# Supplementary material for: Weaning Induces Stress-Dependent DNA Methylation and Transcriptional Changes in Piglet PBMCs
Source: Front Genet. 2021 Feb 5;12:633564. doi: 10.3389/fgene.2021.633564 (PMC7893110; doi:10.3389/fgene.2021.633564)
Supplement: Supplementary file 3 [file Table_1.XLSX]

## Sheet: Sheet1
Table S1. Whole-Genome Bisulfite Sequencig Read Summary
Sample ID	No. Raw Reads	Perc. Trimmed Reads	% Uniquely Mapped	% Low Conversion	% Deduplicated	Global CpG Methylation Rate (%)
98-7_Pre	171913620	99.9232	88.08	0	94.2406	80.8
98-7_Post	148621253	99.9209	88.25	0	93.2783	81.1
98-8_Pre	129793223	95.8	85.946	7	74.9592	79.1233
98-8_Post	146807971	96.8	89.1938	9.1	72.2233	80.1336
98-19_Pre	160226014	96.6	89.1636	9	69.3168	80.5971
98-19_Post	140287192	97.6	88.7509	11.4	72.2354	80.9695
102-1_Pre	136042171	96	88.2028	6.6	74.1721	80.0995
102-1_Post	128217018	97.5	88.766	11.7	73.0938	81.0185
102-7_Pre	173164750	99.9108	87.64	0	93.3812	80.6
102-7_Post	154119196	99.9137	86.76	0	94.662	80.3
102-9_Pre	146145767	96.4786	88.9668	12.4	72.4178	82.8453
102-9_Post	194528096	96.3493	89.2755	6.9	68.4634	79.9347
