# Supplementary material for: Weaning Induces Stress-Dependent DNA Methylation and Transcriptional Changes in Piglet PBMCs
Source: Front Genet. 2021 Feb 5;12:633564. doi: 10.3389/fgene.2021.633564 (PMC7893110; doi:10.3389/fgene.2021.633564)
Supplement: Supplementary file 4 [file Table_2.XLSX]

## Sheet: Sheet1
Table S2. Summary of Differential Methylation Analysis
Chromosome	Start	End	methylation difference all	FDR all	methylation difference low	FDR low	methylation difference high	FDR high	Gene Feature	Gene ID	Gene Name
1	153001	154000	-5.09399	0.0925015	-13.0513	0.00108396	1.04932	0.851418	Gene Body	ENSSSCG00000029697	FAM120B
1	343001	344000	5.0284	0.390202	-3.43919	0.515107	14.023	0.0110301	Intergenic	NA	NA
1	375001	376000	-8.60802	0.0161505	-11.2557	0.0191255	-5.04573	0.456737	Promoter	ENSSSCG00000050193
1	395001	396000	5.47839	0.457909	-2.29156	0.618323	12.1151	0.0246195	Promoter	ENSSSCG00000046031
1	452001	453000	-3.12909	0.361737	5.67158	0.238834	-10.3148	0.00104329	Intergenic	NA	NA
1	508001	509000	7.2275	0.194265	2.33174	0.860267	11.6631	0.0170164	Intergenic	NA	NA
1	541001	542000	-0.141311	0.61858	-10.7401	0.0004661	9.80143	0.0157816	Promoter	ENSSSCG00000004010	ERMARD
1	672001	673000	-6.47355	0.00196893	-0.314287	0.748388	-14.7369	1.23e-10	Gene Body	ENSSSCG00000004008
1	786001	787000	-6.97291	0.00474804	-11.2771	0.0009553	-1.30242	0.668779	Intergenic	NA	NA
1	813001	814000	12.7618	1.66e-06	6.4626	0.391697	20.3643	6.62e-09	Intergenic	NA	NA
1	1042001	1043000	-7.01473	0.00501496	-10.2116	0.0002569	-1.57074	0.763055	Intergenic	NA	NA
1	1377001	1378000	-4.45336	0.188535	-11.0577	0.0368226	-0.0949171	0.898435	Promoter	ENSSSCG00000043714
1	1416001	1417000	-6.0428	0.0369357	-0.743629	0.847858	-12.9957	0.00122396	Gene Body	ENSSSCG00000031703
1	1486001	1487000	-2.93161	0.488695	-11.2066	0.00062949	5.19462	0.200775	Intergenic	NA	NA
1	1521001	1522000	-5.54469	0.27092	-19.0909	0.0057319	1.56814	0.759671	Promoter	ENSSSCG00000049642
1	1543001	1544000	2.84834	0.465018	-6.01347	0.337059	13.4184	0.00326245	Intergenic	NA	NA
1	1562001	1563000	-8.6045	0.0124279	-11.6942	0.00508478	-4.72311	0.505379	Intergenic	NA	NA
1	1576001	1577000	-6.56488	0.00266176	-12.5334	5.08e-05	1.11446	0.802359	Gene Body	ENSSSCG00000004018	AFDN
1	1609001	1610000	9.77191	7.52e-06	6.72417	0.0132715	12.8934	0.00296651	Gene Body	ENSSSCG00000004018	AFDN
1	1629001	1630000	-7.51224	0.00463718	0.501915	0.909002	-16.0903	5.46e-06	Gene Body	ENSSSCG00000004018	AFDN
1	1754001	1755000	-5.51445	0.109144	5.18604	0.781646	-15.5252	0.0028441	Promoter	ENSSSCG00000051018
1	1770001	1771000	-5.11357	0.0236135	-0.504618	0.871755	-12.8245	0.00030187	Gene Body	ENSSSCG00000049134
1	1963001	1964000	-5.24298	0.0142456	-10.4741	0.0060763	0.341634	0.713629	Promoter	ENSSSCG00000051474
1	2007001	2008000	-5.55592	0.0655927	-11.3356	0.00133377	0.74651	0.814271	Intergenic	NA	NA
1	2033001	2034000	-1.25969	0.83254	8.83971	0.0135561	-14.0118	0.00060497	Intergenic	NA	NA
1	2045001	2046000	5.15697	0.0657295	10.3371	0.00526814	-0.308265	0.854207	Intergenic	NA	NA
1	2050001	2051000	-4.26857	0.157817	1.30606	0.839184	-10.1769	0.00933204	Intergenic	NA	NA
1	2084001	2085000	-8.61054	0.00052324	-5.69418	0.065205	-11.746	0.0210675	Intergenic	NA	NA
1	2121001	2122000	-1.00122	0.789881	-11.5966	0.0140993	8.76578	0.0748991	Promoter	ENSSSCG00000043814
1	2153001	2154000	6.3274	0.00166515	10.7301	0.0001757	1.58978	0.634012	Promoter	ENSSSCG00000004024
1	2216001	2217000	-6.79811	0.0932246	-2.14094	0.752541	-10.9845	0.0300169	Gene Body	ENSSSCG00000004022	RPS6KA2
1	2237001	2238000	-6.60189	0.0814249	-15.1045	4.53e-05	3.3422	0.536679	Gene Body	ENSSSCG00000004022	RPS6KA2
1	2239001	2240000	7.64698	0.0387254	14.4599	0.00228616	0.595238	0.865184	Gene Body	ENSSSCG00000004022	RPS6KA2
1	2276001	2277000	6.01729	0.0124966	-4.33741	0.792843	18.6102	0.00022167	Gene Body	ENSSSCG00000004022	RPS6KA2
1	2298001	2299000	4.21555	0.179342	0.319587	0.870328	10.0593	0.0353455	Gene Body	ENSSSCG00000004022	RPS6KA2
1	2349001	2350000	-8.8254	2.88e-05	-11.108	7.7e-05	-4.66932	0.242748	Gene Body	ENSSSCG00000004022	RPS6KA2
1	2357001	2358000	-8.14971	0.00650802	-2.97787	0.709899	-14.1615	0.00079331	Gene Body	ENSSSCG00000004022	RPS6KA2
1	2488001	2489000	-2.69593	0.660903	-12.5408	0.0317126	5.61647	0.245342	Gene Body	ENSSSCG00000004022	RPS6KA2
1	2542001	2543000	6.16984	0.123978	13.9129	0.00909318	-0.0233014	0.889521	Promoter	ENSSSCG00000032916
1	2553001	2554000	-1.05841	0.710178	-11.6283	0.0035248	7.80121	0.101275	Intergenic	NA	NA
1	2566001	2567000	-3.23005	0.34265	-10.5404	0.00780893	2.69815	0.594698	Intergenic	NA	NA
1	2581001	2582000	5.55315	0.086209	2.90523	0.697998	10.3077	0.0121706	Gene Body	ENSSSCG00000004020	SFT2D1
1	2613001	2614000	-7.17684	0.0529237	-10.7501	0.0279872	-3.14221	0.68566	Intergenic	NA	NA
1	2811001	2812000	13.1572	0.00303595	8.57552	0.128597	14.3501	0.0445498	Intergenic	NA	NA
1	2922001	2923000	-6.40796	0.0663248	1.05722	0.69453	-14.3762	0.00014531	Intergenic	NA	NA
1	2964001	2965000	3.65891	0.172056	11.9696	0.0011902	-2.69321	0.556801	Promoter	ENSSSCG00000051306
1	3020001	3021000	6.05857	0.182902	-10.7531	0.0718071	23.0637	5.95e-08	Intergenic	NA	NA
1	3250001	3251000	-7.0083	0.0342123	-3.77868	0.531218	-11.1611	0.0263154	Gene Body	ENSSSCG00000004027	PDE10A
1	3322001	3323000	-13.955	1.14e-06	-18.2784	2.57e-05	-9.94267	0.0512468	Gene Body	ENSSSCG00000004027	PDE10A
1	3324001	3325000	-4.07849	0.164971	0.632468	0.875315	-10.2361	0.013608	Gene Body	ENSSSCG00000004027	PDE10A
1	3396001	3397000	-5.585	0.0215484	-10.3569	0.00110746	-1.41171	0.749982	Intergenic	NA	NA
1	3447001	3448000	3.08969	0.274973	-8.38012	0.36601	14.0143	0.00053764	Intergenic	NA	NA
1	3642001	3643000	3.16989	0.462242	-8.471	0.0535356	14.6248	1.54e-05	Gene Body	ENSSSCG00000044274
1	4230001	4231000	3.81503	0.912736	9.59167	0.153776	-10.34	0.0276921	Intergenic	NA	NA
1	4246001	4247000	3.36989	0.359219	-2.89237	0.695863	10.3204	0.0164859	Intergenic	NA	NA
1	4258001	4259000	3.16605	0.389527	10.9154	0.00595747	-5.85971	0.345258	Gene Body	ENSSSCG00000050396
1	4478001	4479000	-3.94944	0.430264	3.12443	0.684404	-11.096	0.0467625	Intergenic	NA	NA
1	4565001	4566000	-9.09244	0.0207545	-5.20949	0.88555	-13.006	0.00041095	Intergenic	NA	NA
1	4600001	4601000	3.83194	0.421739	-5.94372	0.380675	13.0217	0.00104078	Intergenic	NA	NA
1	4927001	4928000	-4.36947	0.354408	2.54721	0.727639	-11.2445	0.0159009	Promoter	ENSSSCG00000050646
1	4949001	4950000	13.5023	1.06e-05	13.7058	0.0256619	11.7021	0.00125538	Intergenic	NA	NA
1	5464001	5465000	3.49895	0.394059	-5.37098	0.384125	14.3348	0.00085636	Promoter	ENSSSCG00000038153	PACRG
1	5723001	5724000	-8.52516	0.00051538	-4.84519	0.341246	-12.2356	0.00075591	Gene Body	ENSSSCG00000004032	PRKN
1	5744001	5745000	-3.13988	0.426581	3.62829	0.488724	-10.8295	0.00632055	Gene Body	ENSSSCG00000004032	PRKN
1	5993001	5994000	4.27103	0.439094	10.4404	0.0468927	-1.29609	0.84237	Gene Body	ENSSSCG00000004032	PRKN
1	6376001	6377000	1.02665	0.885111	-7.25754	0.0123869	10.5894	0.017713	Gene Body	ENSSSCG00000004032	PRKN
1	6528001	6529000	7.11644	0.119133	3.16866	0.81303	12.2206	0.0305732	Gene Body	ENSSSCG00000004032	PRKN
1	6544001	6545000	-5.75675	0.28502	1.13705	0.893783	-12.8927	0.0474594	Gene Body	ENSSSCG00000004032	PRKN
1	6650001	6651000	10.3747	0.0440865	4.15895	0.726009	14.0896	0.0143502	Gene Body	ENSSSCG00000004032	PRKN
1	6699001	6700000	6.32648	0.2067	13.6909	0.0235705	-3.69401	0.608521	Gene Body	ENSSSCG00000004032	PRKN
1	6705001	6706000	-4.33487	0.494826	-13.6272	0.00988745	6.92996	0.259632	Gene Body	ENSSSCG00000004032	PRKN
1	6972001	6973000	5.63399	0.0317843	2.64913	0.616594	10.5409	0.00953199	Gene Body	ENSSSCG00000004037	MAP3K4
1	6997001	6998000	6.64111	0.0042716	5.21797	0.429778	10.0011	0.00196683	Promoter	ENSSSCG00000004037	MAP3K4
1	7162001	7163000	-5.67406	0.396472	1.26263	0.677064	-12.6844	0.0351525	Gene Body	ENSSSCG00000004039	SLC22A3
1	7197001	7198000	-2.69151	0.151483	1.55513	0.890885	-10.5084	0.027542	Gene Body	ENSSSCG00000004039	SLC22A3
1	7312001	7313000	-4.80322	0.0584298	1.67388	0.830379	-13.8344	0.00012621	Gene Body	ENSSSCG00000004040	SLC22A2
1	7353001	7354000	7.62835	0.032245	4.08705	0.631026	10.9554	0.0187007	Gene Body	ENSSSCG00000004041	SLC22A1
1	7409001	7410000	-3.46413	0.274766	-12.4111	2.49e-06	4.09235	0.148607	Gene Body	ENSSSCG00000004044	IGF2R
1	7416001	7417000	-9.19215	0.00015638	-10.368	0.00588834	-8.29862	0.061569	Gene Body	ENSSSCG00000004044	IGF2R
1	7418001	7419000	-7.32415	0.0150007	-3.7786	0.494035	-11.42	0.0110333	Gene Body	ENSSSCG00000004044	IGF2R
1	7420001	7421000	6.46903	0.0957277	13.3981	0.0353635	-0.259479	0.766718	Gene Body	ENSSSCG00000004044	IGF2R
1	7447001	7448000	14.0404	4.31e-13	-8.04775	0.657892	36.1726	1.89e-28	Gene Body	ENSSSCG00000004044	IGF2R
1	7463001	7464000	10.0989	0.0816196	1.50904	0.789613	14.278	0.0302874	Gene Body	ENSSSCG00000004044	IGF2R
1	7491001	7492000	8.29493	0.00035884	11.8804	0.00010613	4.77797	0.467152	Intergenic	NA	NA
1	7499001	7500000	-12.0721	7.36e-08	-9.4847	0.0143123	-15.9214	1.92e-05	Intergenic	NA	NA
1	7539001	7540000	11.2195	0.00456567	7.12527	0.531435	17.7485	0.00128089	Intergenic	NA	NA
1	7613001	7614000	7.23481	0.197717	6.6313	0.877187	14.2238	0.0217063	Promoter	ENSSSCG00000004049	ACAT2
1	7876001	7877000	5.91106	0.355366	-3.08773	0.794004	12.8194	0.0310452	Intergenic	NA	NA
1	7882001	7883000	7.4987	0.0106914	2.25017	0.681355	12.1366	0.00173616	Promoter	ENSSSCG00000043250
1	7978001	7979000	7.33377	0.0190543	11.8157	0.0244973	-0.0175932	0.661389	Intergenic	NA	NA
1	8045001	8046000	-10.1499	6.05e-05	-11.1002	0.0110181	-8.11338	0.0234436	Gene Body	ENSSSCG00000004052	FNDC1
1	8075001	8076000	10.1071	1.86e-05	8.24007	0.0535774	14.4134	0.0008695	Gene Body	ENSSSCG00000004052	FNDC1
1	8151001	8152000	5.58434	0.011308	11.4067	0.0356415	2.06004	0.338773	Gene Body	ENSSSCG00000045315
1	8167001	8168000	-7.08709	0.0892248	3.50266	0.63834	-18.3953	6.26e-06	Intergenic	NA	NA
1	8168001	8169000	-12.5851	3.39e-05	-10.3257	0.0780551	-15.4721	0.00089992	Promoter	ENSSSCG00000047337
1	8189001	8190000	-2.17933	0.600131	4.90496	0.112295	-10.0095	3.08e-05	Gene Body	ENSSSCG00000047337
1	8212001	8213000	-8.07775	0.113057	0.954451	0.545044	-18.7812	2.9e-05	Promoter	ENSSSCG00000004053	TAGAP
1	8375001	8376000	8.01066	0.0365551	3.2736	0.639997	13.6555	0.0162913	Intergenic	NA	NA
1	8447001	8448000	-5.22566	0.014529	4.53526	0.802638	-16.9598	0.00028639	Gene Body	ENSSSCG00000004058	EZR
1	8490001	8491000	-5.67642	0.221532	-13.7852	0.00226877	4.50218	0.513995	Gene Body	ENSSSCG00000004057	SYTL3
1	8491001	8492000	-3.4375	0.578567	-11.239	0.0201139	7.063	0.205792	Gene Body	ENSSSCG00000004057	SYTL3
1	8496001	8497000	-6.39074	0.171221	-10.8096	0.0452982	-0.684739	0.876463	Gene Body	ENSSSCG00000004057	SYTL3
1	8513001	8514000	11.2264	0.00915907	9.42139	0.410194	15.2546	0.00967205	Gene Body	ENSSSCG00000004057	SYTL3
1	8533001	8534000	-7.13881	0.0268402	-4.63125	0.440913	-10.323	0.0456863	Gene Body	ENSSSCG00000004057	SYTL3
1	8576001	8577000	3.55182	0.443867	-6.13607	0.65893	19.9058	0.00689664	Gene Body	ENSSSCG00000024876	TMEM181
1	8588001	8589000	11.3888	1.46e-08	5.71298	0.00660726	13.9351	9.33e-06	Gene Body	ENSSSCG00000024876	TMEM181
1	8634001	8635000	-2.65055	0.603432	7.05947	0.476286	-13.8732	0.029759	Promoter	ENSSSCG00000024876	TMEM181
1	8846001	8847000	-10.1433	0.00997227	-7.3171	0.173877	-7.65432	0.0734118	Gene Body	ENSSSCG00000043930
1	8901001	8902000	-6.82746	0.00599834	-3.42979	0.579093	-10.7216	0.00310609	Intergenic	NA	NA
1	8948001	8949000	-11.6915	0.00529804	-11.9427	0.038093	-8.61974	0.216837	Promoter	ENSSSCG00000012314	SERAC1
1	9049001	9050000	-8.04717	0.043707	-13.3403	0.00718751	-3.88062	0.777657	Gene Body	ENSSSCG00000012315	SYNJ2
1	9103001	9104000	-5.75343	0.171507	-13.1901	0.011274	5.09755	0.782607	Gene Body	ENSSSCG00000012315	SYNJ2
1	9122001	9123000	-0.0266596	0.735567	-9.52689	0.208958	11.1966	0.0127997	Intergenic	NA	NA
1	9131001	9132000	3.7999	0.146338	11.5716	0.00395867	-2.36632	0.532011	Gene Body	ENSSSCG00000030535	SNX9
1	9150001	9151000	-11.3051	0.017607	-7.94016	0.720097	-15.4884	0.00212836	Gene Body	ENSSSCG00000030535	SNX9
1	9191001	9192000	-9.6968	9.07e-05	-12.7039	0.00053285	-6.40992	0.174498	Promoter	ENSSSCG00000030535	SNX9
1	9231001	9232000	-6.222	0.00870717	0.821468	0.908764	-13.0866	3.04e-05	Gene Body	ENSSSCG00000030535	SNX9
1	9511001	9512000	4.11822	0.298317	-4.98659	0.584579	14.4434	0.00158915	Gene Body	ENSSSCG00000035027	ZDHHC14
1	9780001	9781000	-11.3721	0.0041047	-9.64328	0.491476	-14.8898	0.00525964	Intergenic	NA	NA
1	9785001	9786000	-6.031	0.21366	-1.13126	0.921935	-12.7227	0.023562	Intergenic	NA	NA
1	9986001	9987000	-1.33617	0.701898	-15.0305	0.0120402	11.6918	0.113924	Gene Body	ENSSSCG00000004064	ARID1B
1	10063001	10064000	-9.32227	0.00717474	-18.4627	3.7e-06	3.6038	0.747214	Gene Body	ENSSSCG00000004064	ARID1B
1	10292001	10293000	-3.65121	0.352131	-10.1224	0.0309168	1.07303	0.825151	Promoter	ENSSSCG00000045120
1	10832001	10833000	12.5795	0.00052324	14.09	0.00338873	6.18639	0.240123	Intergenic	NA	NA
1	10871001	10872000	-2.58618	0.699043	-10.7372	0.035169	5.66179	0.337302	Intergenic	NA	NA
1	11486001	11487000	-4.11123	0.580248	2.60811	0.541879	-11.6015	0.0445064	Gene Body	ENSSSCG00000004068	NOX3
1	11667001	11668000	-7.77415	0.0394277	-12.7736	0.017495	-2.39581	0.676113	Gene Body	ENSSSCG00000004065	TIAM2
1	11680001	11681000	-8.00031	0.0184603	-4.42483	0.527742	-12.8679	0.011834	Gene Body	ENSSSCG00000004065	TIAM2
1	11725001	11726000	-8.37813	0.0558133	-10.8419	0.0449884	-4.96756	0.631193	Gene Body	ENSSSCG00000004065	TIAM2
1	12173001	12174000	5.56933	0.190175	11.5659	0.0154589	-0.925808	0.873456	Intergenic	NA	NA
1	12189001	12190000	9.19871	0.0328641	3.03922	0.772512	15.6066	0.00488475	Intergenic	NA	NA
1	12416001	12417000	-6.83459	0.050208	-13.1407	0.0258355	1.69153	0.748016	Intergenic	NA	NA
1	12424001	12425000	-14.5643	1.87e-12	-16.8099	1.46e-07	-12.633	0.00016493	Intergenic	NA	NA
1	12440001	12441000	-2.23637	0.669273	-13.5215	0.00620845	13.3071	0.0433379	Intergenic	NA	NA
1	12520001	12521000	-7.59083	0.0255721	-13.9797	0.0004213	1.85973	0.840747	Intergenic	NA	NA
1	12529001	12530000	-9.13043	0.0700779	-3.41025	0.727002	-14.5118	0.0244288	Promoter	ENSSSCG00000046319
1	12551001	12552000	3.01011	0.354777	0.631999	0.877454	11.1336	0.0492011	Gene Body	ENSSSCG00000046319
1	13075001	13076000	-4.30738	0.216173	2.68697	0.659407	-11.0563	0.00725617	Intergenic	NA	NA
1	13126001	13127000	6.57161	0.429971	13.8641	0.0242059	-2.23162	0.614017	Intergenic	NA	NA
1	13160001	13161000	-6.31459	0.189544	-12.3122	0.0324762	-0.865955	0.894294	Intergenic	NA	NA
1	13316001	13317000	-6.4259	0.162561	-10.6628	0.0420023	-0.881233	0.896563	Intergenic	NA	NA
1	13751001	13752000	-8.03715	0.0572644	-5.19961	0.811472	-13.4924	0.0113192	Gene Body	ENSSSCG00000004081
1	13882001	13883000	-8.32917	0.0182293	-3.98718	0.707265	-13.7928	0.00266762	Gene Body	ENSSSCG00000004081
1	13950001	13951000	-10.2797	0.00303654	-17.6167	0.00026522	-1.47605	0.710761	Intergenic	NA	NA
1	14038001	14039000	-7.64792	7.75e-05	-2.40949	0.660979	-13.8942	4.04e-07	Gene Body	ENSSSCG00000004082
1	14055001	14056000	-7.5836	0.00719018	-2.07749	0.755189	-13.9975	0.00025499	Gene Body	ENSSSCG00000004082
1	14666001	14667000	8.01407	0.0315638	20.5966	0.0201713	4.1757	0.875496	Gene Body	ENSSSCG00000004087	CCDC170
1	14886001	14887000	4.57986	0.050832	-1.60037	0.712215	10.5511	2.1e-05	Gene Body	ENSSSCG00000004090	ZBTB2
1	14909001	14910000	-5.91524	0.267414	1.41137	0.81255	-12.3038	0.0196966	Gene Body	ENSSSCG00000031733	AKAP12
1	14931001	14932000	-13.7942	0.00170638	-10.6718	0.104923	-15.2053	0.031369	Gene Body	ENSSSCG00000031733	AKAP12
1	15104001	15105000	-2.61392	0.351803	1.78506	0.632842	-11.134	0.00374642	Intergenic	NA	NA
1	15115001	15116000	9.12631	0.0735527	15.5449	0.027322	2.76221	0.783588	Intergenic	NA	NA
1	15124001	15125000	-9.72222	0.00033973	-11.501	0.0130517	-8.05241	0.0715321	Intergenic	NA	NA
1	15237001	15238000	-3.01588	0.342537	1.53402	0.637877	-10.6939	0.0229561	Gene Body	ENSSSCG00000004092	MTHFD1L
1	15320001	15321000	6.65561	0.17805	-1.55372	0.834042	15.5355	0.00469436	Promoter	ENSSSCG00000004092	MTHFD1L
1	15491001	15492000	10.0717	0.0955935	6.97975	0.825453	14.6976	0.0179324	Gene Body	ENSSSCG00000032778	PLEKHG1
1	15493001	15494000	7.6995	0.0109204	10.6929	0.0124206	4.66078	0.576826	Gene Body	ENSSSCG00000032778	PLEKHG1
1	15891001	15892000	-6.53659	0.0634155	-2.4588	0.780635	-10.573	0.0144592	Gene Body	ENSSSCG00000004094	PPP1R14C
1	16001001	16002000	6.41852	0.097492	11.8611	0.0197077	1.16896	0.805509	Intergenic	NA	NA
1	16102001	16103000	-6.34545	0.0901696	-1.69589	0.774813	-11.0444	0.0306304	Promoter	ENSSSCG00000041378
1	16133001	16134000	-5.37261	0.165553	-10.02	0.0335642	0.489347	0.886334	Intergenic	NA	NA
1	16157001	16158000	3.52565	0.54017	11.0643	0.0411555	-5.26114	0.438437	Gene Body	ENSSSCG00000004101	LRP11
1	16397001	16398000	-6.75516	0.0502154	-3.51982	0.701234	-10.0833	0.0177504	Intergenic	NA	NA
1	16464001	16465000	-11.5886	0.012884	-9.94662	0.175775	-13.1317	0.10452	Promoter	ENSSSCG00000004109	ZC3H12D
1	16477001	16478000	3.59223	0.120452	10.3221	0.0249917	-1.0746	0.873704	Gene Body	ENSSSCG00000004109	ZC3H12D
1	16482001	16483000	4.09534	0.550976	-5.68166	0.526889	13.5173	0.0484167	Gene Body	ENSSSCG00000004109	ZC3H12D
1	16495001	16496000	8.02425	0.0701047	10.3346	0.0444705	4.44277	0.703191	Gene Body	ENSSSCG00000004109	ZC3H12D
1	16497001	16498000	6.80568	0.120342	-3.03083	0.863691	13.6076	0.00528309	Gene Body	ENSSSCG00000004109	ZC3H12D
1	16520001	16521000	3.85367	0.197041	-3.90787	0.648423	15.5861	0.00011587	Intergenic	NA	NA
1	16683001	16684000	4.90888	0.201761	-1.0328	0.887744	10.9758	0.0189053	Intergenic	NA	NA
1	16855001	16856000	-2.65637	0.507966	-10.7685	0.0211983	6.30744	0.409399	Gene Body	ENSSSCG00000028974	UST
1	17124001	17125000	-7.32026	0.108381	-14.6149	0.0017572	1.09404	0.793652	Gene Body	ENSSSCG00000028974	UST
1	17167001	17168000	-7.77686	0.0239257	-1.12876	0.781584	-13.5681	0.00067189	Intergenic	NA	NA
1	17278001	17279000	1.73696	0.330324	11.694	0.0245361	-6.14496	0.499538	Intergenic	NA	NA
1	17371001	17372000	-6.84305	0.0231292	-3.41549	0.60076	-11.1663	0.00993743	Gene Body	ENSSSCG00000033175	SASH1
1	17391001	17392000	-8.29847	0.00122759	-6.09796	0.357225	-12.1487	0.00189095	Gene Body	ENSSSCG00000033175	SASH1
1	17396001	17397000	-7.02677	0.180251	-1.26245	0.836529	-11.887	0.0423523	Gene Body	ENSSSCG00000033175	SASH1
1	17626001	17627000	-3.95334	0.340134	-12.3266	0.0215201	3.26443	0.674534	Gene Body	ENSSSCG00000033175	SASH1
1	17869001	17870000	3.73755	0.366479	-2.90038	0.777779	10.5513	0.0377194	Intergenic	NA	NA
1	18271001	18272000	5.08025	0.187536	0.356842	0.855188	10.0752	0.0145715	Gene Body	ENSSSCG00000048240	SAMD5
1	18521001	18522000	-9.16295	0.0373112	-4.44956	0.599259	-14.5405	0.0219999	Intergenic	NA	NA
1	19091001	19092000	-10.4231	0.0270207	-16.674	0.00408277	-1.99038	0.789256	Gene Body	ENSSSCG00000004114	RAB32
1	19816001	19817000	-7.89339	0.0150647	-10.8293	0.0366299	-4.63763	0.414426	Gene Body	ENSSSCG00000004121	FBXO30
1	19884001	19885000	-8.78504	0.0109836	-1.60803	0.599108	-16.0994	0.00684429	Gene Body	ENSSSCG00000004121	FBXO30
1	20083001	20084000	7.69049	0.122518	15.8818	0.00626352	-1.12439	0.845836	Intergenic	NA	NA
1	20249001	20250000	5.12728	0.0778141	13.6311	1.89e-05	-3.08911	0.660034	Intergenic	NA	NA
1	20499001	20500000	-6.00989	0.0976281	-1.6077	0.806596	-10.1569	0.020877	Gene Body	ENSSSCG00000051757
1	20639001	20640000	8.24523	0.00883538	10.4419	0.0488452	6.94856	0.264316	Gene Body	ENSSSCG00000004123	UTRN
1	21230001	21231000	9.60832	0.00087974	4.20227	0.59534	17.9105	4.84e-05	Promoter	ENSSSCG00000035578
1	21284001	21285000	-7.01249	0.0594523	-10.2152	0.0297009	-2.92359	0.694607	Intergenic	NA	NA
1	21303001	21304000	7.57884	0.0169748	-2.25787	0.699244	17.2651	5.73e-07	Promoter	ENSSSCG00000004127	PLAGL1
1	21371001	21372000	-5.92097	0.277058	8.4855	0.206186	-22.3415	6.92e-06	Intergenic	NA	NA
1	21855001	21856000	-13.5726	0.00281492	-12.4612	0.191826	-14.0591	0.0212921	Gene Body	ENSSSCG00000048780
1	22163001	22164000	-7.83672	0.00154629	-10.3993	0.00085226	-3.42913	0.55773	Promoter	ENSSSCG00000004136	AIG1
1	22222001	22223000	-13.2353	0.117978	-11.8857	0.857573	-12.7258	0.0163319	Gene Body	ENSSSCG00000043315
1	22300001	22301000	-3.62108	0.697893	-14.4259	0.0291547	10.1013	0.156816	Gene Body	ENSSSCG00000004138	HIVEP2
1	22316001	22317000	-8.32853	0.0449558	-0.43693	0.837771	-17.9576	0.00232258	Gene Body	ENSSSCG00000004138	HIVEP2
1	22369001	22370000	-2.60371	0.280447	-10.6172	0.0311224	7.86184	0.484031	Gene Body	ENSSSCG00000004138	HIVEP2
1	22493001	22494000	5.27013	0.225862	-1.20364	0.866988	10.9622	0.0353073	Intergenic	NA	NA
1	25290001	25291000	-4.92012	0.201068	0.394102	0.889162	-10.9457	0.0195065	Intergenic	NA	NA
1	25480001	25481000	11.6656	6.32e-06	10.4117	0.00629263	18.2234	0.00557971	Promoter	ENSSSCG00000004146	REPS1
1	25532001	25533000	1.51773	0.697714	-9.88375	0.13083	13.668	0.00673312	Gene Body	ENSSSCG00000004146	REPS1
1	25711001	25712000	5.44073	0.0157519	2.96903	0.544196	10.132	0.0114116	Intergenic	NA	NA
1	25800001	25801000	-7.67158	0.0193468	-11.6744	0.042957	-2.88053	0.480986	Gene Body	ENSSSCG00000004149	NHSL1
1	26298001	26299000	-4.84726	0.36701	1.88488	0.804822	-11.5126	0.0399005	Intergenic	NA	NA
1	26393001	26394000	10.2901	0.00014336	7.78633	0.085287	16.2933	0.00341604	Intergenic	NA	NA
1	26445001	26446000	-5.10374	0.0700252	-1.51167	0.727635	-10.3345	0.0255932	Intergenic	NA	NA
1	26463001	26464000	4.53437	0.266707	-0.962235	0.912305	12.6267	0.0367272	Intergenic	NA	NA
1	26486001	26487000	7.62662	0.116223	16.3111	0.00442086	-0.401775	0.78443	Gene Body	ENSSSCG00000004154	TNFAIP3
1	26488001	26489000	8.48643	0.0368593	2.42212	0.818947	16.3693	0.00349789	Promoter	ENSSSCG00000004154	TNFAIP3
1	26636001	26637000	10.3808	0.0488318	7.57506	0.434289	11.1506	0.105597	Gene Body	ENSSSCG00000043500
1	26688001	26689000	13.0243	0.00016339	11.3079	0.0632279	15.0519	0.00680171	Intergenic	NA	NA
1	27075001	27076000	3.53684	0.570622	-3.01894	0.63146	11.0606	0.0373645	Promoter	ENSSSCG00000004158	IL22RA2
1	27138001	27139000	-3.07321	0.547301	-13.7769	0.0245058	12.4045	0.108251	Promoter	ENSSSCG00000004157	IL20RA
1	27247001	27248000	9.55066	0.00166841	-2.12195	0.895566	19.5199	2.3e-06	Gene Body	ENSSSCG00000004159	SLC35D3
1	27251001	27252000	0.861986	0.814267	-4.57271	0.245994	10.4544	0.030995	Promoter	ENSSSCG00000004159	SLC35D3
1	27405001	27406000	-7.91962	0.0863262	-1.72414	0.771314	-14.6195	0.0251653	Gene Body	ENSSSCG00000026041	MAP3K5
1	27450001	27451000	-0.754486	0.762453	-12.2246	0.0333404	11.7791	0.104481	Gene Body	ENSSSCG00000026041	MAP3K5
1	27553001	27554000	4.34331	0.26844	-2.97872	0.698367	13.1355	0.00215713	Gene Body	ENSSSCG00000026041	MAP3K5
1	27577001	27578000	7.92034	0.0743058	12.61	0.0145901	1.31419	0.841406	Gene Body	ENSSSCG00000026041	MAP3K5
1	27641001	27642000	-2.17594	0.502467	-11.2845	0.0196775	4.2885	0.523002	Gene Body	ENSSSCG00000039049	MAP7
1	27711001	27712000	-7.61981	0.110234	-3.33355	0.799511	-14.4084	0.0294038	Gene Body	ENSSSCG00000039049	MAP7
1	28398001	28399000	-5.27106	0.271396	1.37987	0.822356	-12.0826	0.0214125	Intergenic	NA	NA
1	28922001	28923000	9.10875	0.00151921	8.84797	0.167467	11.1412	0.00843078	Intergenic	NA	NA
1	29157001	29158000	8.83031	0.0222641	7.24649	0.422719	11.655	0.0265823	Promoter	ENSSSCG00000048900
1	29229001	29230000	-10.6651	0.00024289	-12.3404	0.00584154	-11.0816	0.106655	Gene Body	ENSSSCG00000049766
1	29231001	29232000	3.78776	0.403892	-3.47112	0.63145	12.7416	0.0151284	Gene Body	ENSSSCG00000049766
1	29438001	29439000	4.85778	0.146922	10.1233	0.0184684	0.398728	0.85996	Intergenic	NA	NA
1	29836001	29837000	4.13554	0.294805	-0.791194	0.881493	11.3363	0.0348413	Promoter	ENSSSCG00000004172	SLC2A12
1	29850001	29851000	-11.0885	0.0388524	-14.1787	0.047755	-6.44281	0.537455	Gene Body	ENSSSCG00000004172	SLC2A12
1	29949001	29950000	-9.33848	0.0164295	-15.181	0.00342154	-3.61637	0.629259	Intergenic	NA	NA
1	30023001	30024000	-5.32464	0.217635	-1.08721	0.868763	-10.6809	0.045411	Intergenic	NA	NA
1	30098001	30099000	4.44909	0.23108	10.8379	0.00723203	-2.04418	0.751923	Intergenic	NA	NA
1	30931001	30932000	-6.44796	0.318488	2.72973	0.814459	-14.5545	0.0465617	Gene Body	ENSSSCG00000004178	SLC18B1
1	30934001	30935000	1.96626	0.67072	-9.01516	0.0197954	14.1172	5.29e-05	Promoter	ENSSSCG00000004178	SLC18B1
1	30955001	30956000	3.14921	0.637773	-4.92334	0.302284	10.1904	0.0227679	Gene Body	ENSSSCG00000004178	SLC18B1
1	30961001	30962000	-5.95621	0.170509	-14.146	0.00160913	4.19792	0.6198	Promoter	ENSSSCG00000004179
1	31021001	31022000	-6.26961	0.28761	-14.2674	0.0343164	1.51515	0.847903	Gene Body	ENSSSCG00000004181	VNN1
1	31184001	31185000	-0.614683	0.889812	-9.85236	0.0477531	12.9723	0.0295737	Promoter	ENSSSCG00000004190	STX7
1	32346001	32347000	-5.38177	0.052883	-1.5237	0.715685	-10.4187	0.00909597	Gene Body	ENSSSCG00000036790	AKAP7
1	32362001	32363000	8.50559	0.0242772	13.6626	0.0364906	2.72741	0.505455	Promoter	ENSSSCG00000036790	AKAP7
1	33033001	33034000	3.17269	0.155163	-2.47542	0.740064	12.3145	0.00070951	Promoter	ENSSSCG00000004201	TMEM200A
1	33306001	33307000	-3.91259	0.278723	2.04692	0.729576	-13.2185	0.00136227	Gene Body	ENSSSCG00000004203	L3MBTL3
1	33319001	33320000	-4.63471	0.249161	4.89602	0.254733	-13.4788	7.58e-05	Promoter	ENSSSCG00000004203	L3MBTL3
1	33424001	33425000	-2.33734	0.419117	3.65069	0.481574	-10.7242	0.0057039	Intergenic	NA	NA
1	33528001	33529000	7.84967	0.141763	2.16082	0.864767	16.0884	0.0238116	Promoter	ENSSSCG00000004205	ARHGAP18
1	33606001	33607000	-12.3766	0.00558477	-10.6442	0.137232	-14.2928	0.0520154	Gene Body	ENSSSCG00000004205	ARHGAP18
1	33639001	33640000	3.84089	0.0469388	18.3333	3.43e-06	-12.4116	0.288742	Gene Body	ENSSSCG00000004205	ARHGAP18
1	34116001	34117000	-5.86654	0.119372	0.780166	0.847499	-16.7122	0.0015291	Gene Body	ENSSSCG00000004207
1	34546001	34547000	-5.93569	0.0987464	-3.67978	0.682394	-10.7555	0.0210925	Intergenic	NA	NA
1	35132001	35133000	-6.85805	0.085681	-2.65	0.841229	-11.6462	0.0109611	Gene Body	ENSSSCG00000004209	PTPRK
1	37002001	37003000	7.00993	0.00064343	3.22693	0.407934	12.0705	0.00021512	Promoter	ENSSSCG00000004220	TRMT11
1	37668001	37669000	6.12971	0.11838	0.231864	0.827034	16.2891	0.00047959	Gene Body	ENSSSCG00000004225	TPD52L1
1	38535001	38536000	4.84087	0.271627	0.748474	0.906495	12.0629	0.0159258	Gene Body	ENSSSCG00000036607	NKAIN2
1	38851001	38852000	0.763615	0.702088	3.87205	0.494469	-10.5512	0.0414613	Gene Body	ENSSSCG00000036607	NKAIN2
1	39039001	39040000	5.63883	0.194399	0.524476	0.911309	11.5627	0.0430673	Promoter	ENSSSCG00000036607	NKAIN2
1	39753001	39754000	-6.1823	0.145744	-10.9984	0.0312235	-1.30398	0.874521	Promoter	ENSSSCG00000004232	CLVS2
1	40883001	40884000	3.80518	0.449731	-2.82805	0.732253	11.4123	0.0469854	Intergenic	NA	NA
1	40893001	40894000	5.57599	0.13557	11.8441	0.00751633	-1.02452	0.833553	Intergenic	NA	NA
1	41612001	41613000	-7.11351	0.0739898	-14.8728	0.00487791	-1.2965	0.785759	Intergenic	NA	NA
1	42317001	42318000	-2.64891	0.501186	-10.1488	0.00611506	4.65008	0.310053	Gene Body	ENSSSCG00000050192
1	43213001	43214000	7.45505	5.05e-07	5.18139	0.117162	11.9251	1.84e-06	Promoter	ENSSSCG00000004247	ASF1A
1	43285001	43286000	-10.3003	4.2e-07	-9.17475	0.00732349	-11.6729	0.00030187	Gene Body	ENSSSCG00000050966
1	43609001	43610000	-8.34853	0.182753	-13.8886	0.0471054	-1.15699	0.893458	Intergenic	NA	NA
1	43803001	43804000	-6.86552	0.0372712	-3.80837	0.659422	-12.4578	0.0332924	Gene Body	ENSSSCG00000004250	SLC35F1
1	44303001	44304000	11.2538	0.00957697	12.7039	0.00495169	8.00953	0.537733	Gene Body	ENSSSCG00000004254	DCBLD1
1	44350001	44351000	0.0115786	0.896231	-9.79845	0.0215485	10.2771	0.0137381	Gene Body	ENSSSCG00000004254	DCBLD1
1	44456001	44457000	11.1979	3.76e-05	5.61791	0.308367	16.9339	7.82e-06	Gene Body	ENSSSCG00000026978	ROS1
1	44551001	44552000	-0.338566	0.833193	-6.62778	0.334719	11.3834	0.0155003	Gene Body	ENSSSCG00000004255	VGLL2
1	44967001	44968000	-6.82445	0.115124	-3.16894	0.723533	-11.8711	0.0375089	Gene Body	ENSSSCG00000004263	ZUP1
1	45093001	45094000	-12.2213	0.00138336	-11.9114	0.0540647	-11.1118	0.0430414	Intergenic	NA	NA
1	45357001	45358000	-11.923	0.00067401	-8.81834	0.18014	-16.611	0.00440045	Intergenic	NA	NA
1	45383001	45384000	-5.33535	0.195586	-10.9281	0.0314612	0.0986477	0.887847	Intergenic	NA	NA
1	45583001	45584000	-3.59841	0.573326	1.7094	0.573982	-10.0329	0.0254224	Intergenic	NA	NA
1	47640001	47641000	-7.54899	0.162032	-1.6835	0.795617	-15.4663	0.0313754	Intergenic	NA	NA
1	48101001	48102000	-5.00857	0.330253	1.02653	0.842027	-12.5712	0.00650163	Intergenic	NA	NA
1	49058001	49059000	8.19946	0.076169	4.80071	0.612272	14.129	0.0329495	Gene Body	ENSSSCG00000004270	ADGRB3
1	49132001	49133000	-7.02712	0.0792719	-11.3434	0.0238835	-1.48382	0.828013	Gene Body	ENSSSCG00000004270	ADGRB3
1	49855001	49856000	-7.50161	0.00311391	-4.32372	0.339803	-11.8429	0.00319805	Intergenic	NA	NA
1	51769001	51770000	-6.16462	0.0131486	-4.87158	0.484185	-14.2926	0.0242121	Intergenic	NA	NA
1	52042001	52043000	-4.43942	0.409095	-10.6449	0.00756048	5.25044	0.235941	Gene Body	ENSSSCG00000004280	RIMS1
1	52282001	52283000	6.58398	0.142978	11.311	0.0320194	1.36949	0.870952	Intergenic	NA	NA
1	52585001	52586000	-15.0659	2.2e-05	-13.9903	0.0141501	-16.4674	0.00745608	Gene Body	ENSSSCG00000004281	KCNQ5
1	52960001	52961000	9.27007	0.0104754	20.8421	6.37e-05	-1.90345	0.874975	Intergenic	NA	NA
1	52987001	52988000	10.5369	0.00011129	2.4025	0.630763	18.6282	7.61e-07	Promoter	ENSSSCG00000004283	DPPA5
1	53282001	53283000	7.03133	0.250494	16.9076	0.0463917	-3.27398	0.853099	Gene Body	ENSSSCG00000026943	MRAP2
1	53591001	53592000	-4.26174	0.377438	-10.5	0.0452571	1.00108	0.843358	Intergenic	NA	NA
1	54208001	54209000	-5.03217	0.140945	-11.9687	0.00156306	3.20945	0.523181	Intergenic	NA	NA
1	54294001	54295000	7.98907	0.0774977	13.6698	0.0368682	3.80172	0.657711	Intergenic	NA	NA
1	54306001	54307000	-3.70963	0.32777	1.40426	0.897408	-11.0818	0.0460352	Intergenic	NA	NA
1	54545001	54546000	3.60721	0.535099	-6.12028	0.354244	11.3351	0.0101733	Promoter	ENSSSCG00000004293	SNX14
1	54920001	54921000	-9.22203	4.68e-06	-11.7824	4.94e-05	-5.56451	0.16531	Intergenic	NA	NA
1	55000001	55001000	-10.1138	0.00024351	-10.2036	0.00454219	-9.82818	0.124109	Intergenic	NA	NA
1	55585001	55586000	-6.6627	0.00950685	-1.87635	0.810048	-14.0283	0.00141761	Intergenic	NA	NA
1	55614001	55615000	0.657943	0.83108	-11.4217	0.0280956	7.26255	0.112579	Intergenic	NA	NA
1	55615001	55616000	-7.37282	0.057311	1.64463	0.800572	-14.7722	0.00014247	Intergenic	NA	NA
1	55753001	55754000	-2.11056	0.895723	-14.3768	0.0197384	15.895	0.0134448	Promoter	ENSSSCG00000004300	SMIM8
1	56052001	56053000	2.96517	0.87494	-3.3046	0.194758	10.591	0.0363971	Gene Body	ENSSSCG00000004307
1	57189001	57190000	7.20839	0.0114495	0.89297	0.548058	10.3865	0.00364377	Promoter	ENSSSCG00000004314	PM20D2
1	57314001	57315000	5.30327	0.210679	-7.99075	0.662924	18.9882	0.00090902	Gene Body	ENSSSCG00000024249	GABRR2
1	57362001	57363000	-6.2012	0.156729	-15.3611	0.00022323	4.07904	0.466452	Promoter	ENSSSCG00000004317	UBE2J1
1	57437001	57438000	2.12439	0.566799	-14.2968	0.108957	20.3058	0.00053425	Promoter	ENSSSCG00000004322	ANKRD6
1	57480001	57481000	-4.24214	0.216597	1.89442	0.908876	-10.0258	0.0179914	Gene Body	ENSSSCG00000004322	ANKRD6
1	58204001	58205000	8.86786	5.24e-06	8.01764	0.0159606	10.0206	0.00152488	Promoter	ENSSSCG00000004332	BACH2
1	58220001	58221000	9.5749	0.115372	3.03571	0.913127	17.6692	0.00311087	Promoter	ENSSSCG00000044269
1	58362001	58363000	-10.8737	0.00163861	-7.71194	0.196254	-15.6112	0.00888653	Intergenic	NA	NA
1	58365001	58366000	-14.1137	0.0181788	-19.4954	0.00364181	2.06114	0.837232	Intergenic	NA	NA
1	58456001	58457000	6.54534	0.0958352	14.2058	0.0154387	-2.89433	0.903911	Intergenic	NA	NA
1	59459001	59460000	4.14363	0.311962	-1.65107	0.792851	11.5729	0.0250437	Intergenic	NA	NA
1	59529001	59530000	-7.3703	0.00770666	-12.8119	0.00254688	-3.22258	0.590663	Intergenic	NA	NA
1	59880001	59881000	-6.14443	0.0497433	-11.3553	0.0192479	-0.28394	0.822843	Intergenic	NA	NA
1	60346001	60347000	-3.25674	0.419211	-14.7729	0.00011922	5.22435	0.565082	Intergenic	NA	NA
1	60441001	60442000	-6.56928	0.282492	0.586887	0.620277	-16.203	0.00192644	Intergenic	NA	NA
1	60851001	60852000	-5.63264	0.106552	0.560032	0.910347	-11.7611	0.0089346	Gene Body	ENSSSCG00000004336	EPHA7
1	63974001	63975000	-8.52524	0.0341206	-14.8897	0.0343801	-6.56378	0.638911	Promoter	ENSSSCG00000035240	GPR63
1	64245001	64246000	-7.32777	0.0454984	-10.6307	0.00793391	-2.81761	0.843774	Gene Body	ENSSSCG00000027002	KLHL32
1	65499001	65500000	-3.60362	0.450184	2.8125	0.526832	-10.0717	0.0120821	Intergenic	NA	NA
1	65934001	65935000	4.96573	0.119413	-4.42107	0.450564	12.3046	0.00032112	Promoter	ENSSSCG00000004347	FBXL4
1	65997001	65998000	-4.38788	0.19563	0.103893	0.900967	-10.9337	0.00837198	Intergenic	NA	NA
1	66500001	66501000	4.76556	0.152647	11.83	0.0204763	-1.0114	0.776874	Promoter	ENSSSCG00000004353	CCNC
1	66717001	66718000	8.61998	0.0313554	14.757	0.00585056	2.3042	0.761146	Intergenic	NA	NA
1	66876001	66877000	5.08763	0.157173	-1.60734	0.770587	18.4393	0.000192	Intergenic	NA	NA
1	67222001	67223000	-6.45435	0.016978	-4.84252	0.502604	-10.8007	0.0178603	Gene Body	ENSSSCG00000004357	SIM1
1	67392001	67393000	-6.67174	0.0020972	1.53433	0.832686	-15.3713	0.00013634	Gene Body	ENSSSCG00000004358	ASCC3
1	68228001	68229000	-4.01684	0.319656	2.079	0.71415	-14.0828	0.00249044	Gene Body	ENSSSCG00000004361	GRIK2
1	68452001	68453000	-5.5688	0.0252898	-1.21901	0.735408	-10.3108	0.00244242	Gene Body	ENSSSCG00000004361	GRIK2
1	69109001	69110000	-0.79329	0.847541	7.38763	0.0198056	-10.7627	0.0258089	Intergenic	NA	NA
1	69634001	69635000	0.419817	0.855712	11.0487	0.0580698	-10.5711	0.0141085	Intergenic	NA	NA
1	70702001	70703000	7.16143	0.178174	13.6977	0.0111555	-4.96075	0.575528	Intergenic	NA	NA
1	70929001	70930000	-7.14883	0.26254	4.30315	0.817482	-13.7908	0.036119	Intergenic	NA	NA
1	71400001	71401000	6.47613	0.135165	-2.07992	0.803243	14.4131	0.00175067	Promoter	ENSSSCG00000004367	POPDC3
1	71593001	71594000	1.8404	0.783747	-4.33821	0.438523	10.5348	0.0197034	Gene Body	ENSSSCG00000004368	PREP
1	71635001	71636000	-4.11187	0.0846959	-11.5418	0.0074272	-0.188386	0.882222	Promoter	ENSSSCG00000004368	PREP
1	71723001	71724000	-6.84024	0.00507809	-10.3914	0.00332271	-4.09444	0.378086	Intergenic	NA	NA
1	72107001	72108000	4.12227	0.39024	-5.87121	0.546029	16.5301	0.00344506	Gene Body	ENSSSCG00000034393
1	72140001	72141000	1.57975	0.776312	12.6372	0.0024601	-10.5838	0.0186073	Gene Body	ENSSSCG00000034393
1	72254001	72255000	-5.14141	0.206292	-11.1671	0.00646546	2.25959	0.642235	Intergenic	NA	NA
1	72256001	72257000	-5.02012	0.0209556	-12.1587	0.00458292	0.897959	0.757704	Intergenic	NA	NA
1	72273001	72274000	5.36367	0.232992	12.7017	0.0195584	-2.81457	0.715516	Gene Body	ENSSSCG00000004370	ATG5
1	72297001	72298000	-5.58895	0.127475	-0.896132	0.843314	-11.5505	0.0212302	Gene Body	ENSSSCG00000004370	ATG5
1	72340001	72341000	5.97714	0.0408018	11.4353	0.00039077	-0.657962	0.814549	Gene Body	ENSSSCG00000004370	ATG5
1	72354001	72355000	-12.1285	4.33e-05	-12.4506	0.0573922	-11.4462	0.00226925	Gene Body	ENSSSCG00000004370	ATG5
1	72519001	72520000	5.12821	0.260207	-0.924872	0.895325	12.3601	0.0318219	Promoter	ENSSSCG00000004370	ATG5
1	72845001	72846000	5.93891	0.112157	1.29106	0.839003	11.6216	0.0193351	Promoter	ENSSSCG00000049906
1	73110001	73111000	-8.51674	0.0675103	-3.17449	0.862856	-17.7656	0.00176123	Intergenic	NA	NA
1	73183001	73184000	-0.870057	0.744588	6.72086	0.369666	-12.7358	0.033867	Intergenic	NA	NA
1	73689001	73690000	-11.0826	0.044539	-11.9235	0.277184	-8.98575	0.1781	Gene Body	ENSSSCG00000004379	SOBP
1	73700001	73701000	7.45696	0.00128037	5.96628	0.549154	15.7633	0.00018766	Promoter	ENSSSCG00000004379	SOBP
1	73841001	73842000	-8.31212	0.0218574	-5.30872	0.559354	-11.9602	0.0092099	Gene Body	ENSSSCG00000033392	SCML4
1	74180001	74181000	5.1879	0.233628	0.731921	0.88779	11.8677	0.0300141	Promoter	ENSSSCG00000004383	OSTM1
1	74224001	74225000	11.4159	0.018919	4.88473	0.198869	15.8305	0.123344	Intergenic	NA	NA
1	74242001	74243000	-7.29974	0.214908	-12.8211	0.0423769	-0.643395	0.889833	Intergenic	NA	NA
1	74349001	74350000	3.8712	0.00068941	10.895	1.94e-05	-3.98765	0.783058	Promoter	ENSSSCG00000004385	SNX3
1	74625001	74626000	-4.46404	0.123573	-12.3235	0.00016613	2.68042	0.657776	Intergenic	NA	NA
1	74674001	74675000	5.69048	0.11256	-0.030327	0.876734	10.7247	0.019811	Gene Body	ENSSSCG00000004387
1	74761001	74762000	-15.8981	0.00170923	-17.9579	0.0562117	-21.1057	0.0668692	Intergenic	NA	NA
1	74814001	74815000	-10.3418	0.00498998	-13.8205	0.00855297	-5.86248	0.402567	Intergenic	NA	NA
1	74852001	74853000	-4.29329	0.387014	-2.79434	0.45602	-13.4007	0.0249959	Intergenic	NA	NA
1	74946001	74947000	8.49563	0.0345031	14.6661	0.011666	0.505247	0.709513	Gene Body	ENSSSCG00000004388	ARMC2
1	74954001	74955000	-10.8681	0.0198649	-15.0495	0.0160047	-5.78536	0.579204	Gene Body	ENSSSCG00000004388	ARMC2
1	75053001	75054000	3.76059	0.194957	10.2859	0.0151281	-0.170835	0.784374	Gene Body	ENSSSCG00000004388	ARMC2
1	75755001	75756000	-5.6602	0.0383116	-12.7571	7.43e-05	4.98339	0.451564	Gene Body	ENSSSCG00000004405	FIG4
1	76576001	76577000	-5.75497	0.0435437	-2.37228	0.825712	-15.6803	0.00578898	Intergenic	NA	NA
1	76911001	76912000	-10.3764	0.0003	-10.9016	0.105376	-9.63194	0.00469821	Intergenic	NA	NA
1	76997001	76998000	-7.30198	0.0285921	-14.281	0.00041762	0.945606	0.882824	Promoter	ENSSSCG00000004419	SLC16A10
1	77506001	77507000	11.507	0.0215393	9.93915	0.379547	13.8598	0.0484167	Gene Body	ENSSSCG00000004420	TRAF3IP2
1	77517001	77518000	4.25555	0.257761	-0.462179	0.895325	10.5495	0.0306995	Gene Body	ENSSSCG00000004420	TRAF3IP2
1	77522001	77523000	-13.6809	0.00034236	-17.773	0.00463188	-7.05128	0.163483	Gene Body	ENSSSCG00000004420	TRAF3IP2
1	77680001	77681000	-9.30467	5.95e-05	1.60164	0.820881	-21.8293	1.75e-09	Gene Body	ENSSSCG00000004421	FYN
1	77690001	77691000	6.75096	0.0897404	3.23851	0.848056	11.4841	0.0153546	Gene Body	ENSSSCG00000004421	FYN
1	77708001	77709000	6.88154	0.443285	-2.42888	0.700688	20.203	0.00482053	Gene Body	ENSSSCG00000004421	FYN
1	77769001	77770000	-9.14741	0.0420746	-13.6951	0.00211684	-2.90158	0.859216	Gene Body	ENSSSCG00000004421	FYN
1	77782001	77783000	-4.21881	0.332673	2.36518	0.797416	-15.4687	0.0168765	Gene Body	ENSSSCG00000004421	FYN
1	77785001	77786000	10.1983	0.00381152	11.2717	0.109776	9.96534	0.0645116	Gene Body	ENSSSCG00000004421	FYN
1	77999001	78000000	6.40861	0.035536	11.5726	0.00065034	-0.402703	0.885671	Intergenic	NA	NA
1	79499001	79500000	-1.07438	0.774317	-14.4993	0.00057596	11.621	0.0136909	Intergenic	NA	NA
1	79743001	79744000	-3.53025	0.462656	1.8304	0.656086	-12.6356	0.0415674	Intergenic	NA	NA
1	80514001	80515000	-5.69291	0.175307	-11.7483	0.0222118	0.413075	0.884741	Gene Body	ENSSSCG00000044366
1	80850001	80851000	-6.74893	0.0922832	-2.88846	0.782767	-10.3688	0.0177779	Intergenic	NA	NA
1	80925001	80926000	-4.58699	0.272734	1.3214	0.809791	-11.3636	0.0185507	Intergenic	NA	NA
1	81108001	81109000	7.75741	0.0378251	12.1854	0.031629	-0.548246	0.722007	Intergenic	NA	NA
1	82431001	82432000	6.75039	0.0564051	2.3398	0.797243	12.4902	0.0107577	Promoter	ENSSSCG00000004451	RIPPLY2
1	82851001	82852000	3.47152	0.323235	10.7541	0.0499698	-2.42718	0.643461	Gene Body	ENSSSCG00000004454	ME1
1	82930001	82931000	-12.157	0.056336	-28.5081	0.00425946	1.00336	0.729413	Gene Body	ENSSSCG00000004454	ME1
1	82974001	82975000	6.39003	0.0532606	13.2189	0.0477654	2.04051	0.645922	Gene Body	ENSSSCG00000004454	ME1
1	83002001	83003000	-4.90662	0.068195	-13.7632	0.00087097	-0.55352	0.855312	Promoter	ENSSSCG00000029129	RWDD2A
1	83004001	83005000	9.40478	0.0109836	10.1192	0.0436208	8.73809	0.25254	Promoter	ENSSSCG00000029129	RWDD2A
1	83136001	83137000	2.82209	0.545711	-4.41156	0.205293	13.8415	0.0012923	Promoter	ENSSSCG00000004457	DOP1A
1	84005001	84006000	-4.42691	0.254753	-12.5779	0.0283159	2.05554	0.866458	Gene Body	ENSSSCG00000004460	IBTK
1	84324001	84325000	-10.113	0.0189924	-9.41045	0.362531	-12.3489	0.0436356	Intergenic	NA	NA
1	84543001	84544000	10.2902	2.51e-05	11.292	0.00763509	12.6589	0.0158561	Promoter	ENSSSCG00000004464	TENT5A
1	84547001	84548000	-6.9351	0.0180447	-10.574	0.0283514	-3.9102	0.43079	Promoter	ENSSSCG00000004464	TENT5A
1	85290001	85291000	4.58038	0.150961	-2.46831	0.872174	12.7681	0.0069571	Intergenic	NA	NA
1	85636001	85637000	-6.47399	0.0147769	-13.3086	0.00229685	-2.6454	0.742783	Gene Body	ENSSSCG00000045384
1	86354001	86355000	-5.80955	0.0948891	-10.9677	0.00267458	2.19199	0.76257	Intergenic	NA	NA
1	86558001	86559000	1.34908	0.367178	-7.58985	0.751068	11.599	0.0253072	Gene Body	ENSSSCG00000004469	LCA5
1	86564001	86565000	-3.37653	0.423003	-11.308	0.0447968	4.72955	0.656039	Gene Body	ENSSSCG00000004469	LCA5
1	87024001	87025000	9.67872	0.00072858	3.04736	0.506963	17.0483	7.84e-05	Intergenic	NA	NA
1	87271001	87272000	9.67445	3.75e-06	-2.42944	0.904934	21.1412	6.07e-14	Intergenic	NA	NA
1	87968001	87969000	-5.17119	0.0238729	-2.7417	0.862426	-14.0167	0.00558835	Intergenic	NA	NA
1	89423001	89424000	-10.6756	0.0059545	-14.177	0.0162466	-7.27666	0.337242	Intergenic	NA	NA
1	90396001	90397000	8.00346	0.0428508	10.9576	0.046224	4.59681	0.532984	Gene Body	ENSSSCG00000004479	FILIP1
1	90697001	90698000	-1.05381	0.686743	-14.1192	5.52e-05	11.4349	0.00914409	Promoter	ENSSSCG00000004480	COX7A2
1	90908001	90909000	-8.8409	0.0275636	-12.8683	0.047411	-5.47196	0.418293	Intergenic	NA	NA
1	91209001	91210000	-7.93586	0.00442099	-4.44061	0.508627	-11.7335	0.00055011	Intergenic	NA	NA
1	92086001	92087000	11.9871	0.134278	1.54374	0.751554	28.0952	0.00501411	Gene Body	ENSSSCG00000004485	CD109
1	92242001	92243000	4.75281	0.270312	-1.9413	0.80152	12.9389	0.0110805	Promoter	ENSSSCG00000004485	CD109
1	92418001	92419000	3.78134	0.105833	-1.13838	0.593637	12.4117	2.37e-05	Intergenic	NA	NA
1	92561001	92562000	-6.55394	0.429903	-15.1481	0.00623935	7.65085	0.342842	Intergenic	NA	NA
1	92846001	92847000	-6.67666	0.343529	4.06413	0.751659	-12.9051	0.00759168	Intergenic	NA	NA
1	94270001	94271000	5.93661	0.0714064	2.67559	0.776281	10.1986	0.00997926	Intergenic	NA	NA
1	95103001	95104000	5.81015	0.031968	0.704851	0.621178	11.1459	0.0178353	Intergenic	NA	NA
1	95417001	95418000	2.74804	0.463495	14.0804	0.0316516	-6.66592	0.622129	Intergenic	NA	NA
1	95486001	95487000	-0.288176	0.463298	11.3927	0.00016183	-15.5022	0.0317833	Gene Body	ENSSSCG00000004493	SIGLEC15
1	95499001	95500000	7.83667	0.0589018	-4.56536	0.890171	21.5848	0.00055232	Gene Body	ENSSSCG00000021072	EPG5
1	95761001	95762000	4.8982	0.181104	-0.360902	0.865144	11.8709	0.00413617	Gene Body	ENSSSCG00000004498	HAUS1
1	95797001	95798000	14.3773	0.0100259	11.3088	0.10885	15.527	0.133744	Intergenic	NA	NA
1	95844001	95845000	-2.07164	0.541146	12.691	0.0176177	-13.0477	0.00576215	Gene Body	ENSSSCG00000004500	C18orf25
1	96206001	96207000	7.74917	0.00373529	3.48136	0.639028	11.3735	0.00119002	Gene Body	ENSSSCG00000004503	LOXHD1
1	96223001	96224000	-6.27255	0.267157	-0.681758	0.88936	-14.8672	0.00754586	Gene Body	ENSSSCG00000004503	LOXHD1
1	96244001	96245000	-9.42096	0.00801939	-8.19102	0.232123	-13.0989	0.0497069	Gene Body	ENSSSCG00000004503	LOXHD1
1	96663001	96664000	-7.53927	0.0262772	-1.78223	0.788428	-12.9401	0.00869921	Gene Body	ENSSSCG00000022643	KATNAL2
1	96733001	96734000	-9.52763	0.0212074	-18.5801	0.00128149	-3.91356	0.845652	Intergenic	NA	NA
1	96883001	96884000	-5.14202	0.318926	0.615953	0.868014	-12.9291	0.0459386	Intergenic	NA	NA
1	97035001	97036000	7.02141	0.057252	3.60762	0.613646	10.961	0.0296602	Intergenic	NA	NA
1	97119001	97120000	-9.01508	0.00186851	-17.0057	0.00089873	-6.47515	0.479692	Intergenic	NA	NA
1	97253001	97254000	6.4805	0.0888046	11.2991	0.013086	1.76061	0.851911	Intergenic	NA	NA
1	97376001	97377000	0.52661	0.715415	-6.02501	0.426646	15.4453	0.0464192	Intergenic	NA	NA
1	97452001	97453000	-9.09216	0.171343	-15.5963	0.0334334	-1.92953	0.880213	Gene Body	ENSSSCG00000004505	SMAD2
1	98006001	98007000	3.7143	0.470206	-3.75913	0.460953	12.1552	0.00514695	Gene Body	ENSSSCG00000028076	ZBTB7C
1	98192001	98193000	-9.39	0.00847591	-6.3185	0.484108	-14.236	0.00724361	Gene Body	ENSSSCG00000004506	CTIF
1	98258001	98259000	8.51849	0.0165158	4.11235	0.594374	10.723	0.0151547	Gene Body	ENSSSCG00000004506	CTIF
1	98378001	98379000	11.64	0.0138919	10.4573	0.162481	12.595	0.122147	Gene Body	ENSSSCG00000004506	CTIF
1	98393001	98394000	-15.9163	0.00107372	-11.3967	0.174763	-18.919	0.00476627	Gene Body	ENSSSCG00000004506	CTIF
1	98489001	98490000	-8.18721	0.0813052	-5.46059	0.635454	-12.1347	0.0453319	Intergenic	NA	NA
1	98517001	98518000	13.4134	0.00085446	13.4745	0.0499031	15.5132	0.0413005	Gene Body	ENSSSCG00000004507	SMAD7
1	98576001	98577000	-3.73274	0.34197	0.986411	0.854378	-11.5709	0.0488883	Intergenic	NA	NA
1	98833001	98834000	-11.058	0.00388924	-16.1073	0.00481063	-5.94036	0.404377	Gene Body	ENSSSCG00000004508	DYM
1	98850001	98851000	-5.24342	0.0380613	-1.44173	0.839033	-15.2632	0.00207143	Gene Body	ENSSSCG00000004508	DYM
1	99262001	99263000	-9.72072	0.00015407	-9.2069	0.0437035	-10.0581	0.0119021	Intergenic	NA	NA
1	99312001	99313000	10.6161	0.0065212	7.44242	0.346842	13.8421	0.0132695	Promoter	ENSSSCG00000004510	ACAA2
1	99541001	99542000	-13.2664	0.00673053	-20.4179	2.58e-05	-4.63756	0.856284	Gene Body	ENSSSCG00000004511
1	99549001	99550000	5.91381	0.102912	10.8674	0.0118048	0.149809	0.898583	Gene Body	ENSSSCG00000004511
1	99765001	99766000	-10.8962	0.0223094	-10.7855	0.114382	-12.053	0.249694	Gene Body	ENSSSCG00000004511
1	99824001	99825000	-5.49004	0.208336	-0.455516	0.920023	-14.0165	0.028756	Intergenic	NA	NA
1	100338001	100339000	-7.04461	0.155738	-1.15961	0.834784	-14.7989	0.0344284	Intergenic	NA	NA
1	100585001	100586000	-2.16282	0.775063	3.97629	0.415664	-11.0418	0.00126059	Gene Body	ENSSSCG00000004524	SMAD4
1	100658001	100659000	-4.93827	0.450829	5.16667	0.522703	-15.9444	0.00141468	Intergenic	NA	NA
1	100740001	100741000	-8.59388	0.00132571	-5.30873	0.302139	-13.3142	0.00103298	Intergenic	NA	NA
1	100744001	100745000	-4.64735	0.648495	3.67518	0.613071	-16.1413	0.0261803	Intergenic	NA	NA
1	102930001	102931000	-9.14898	0.0202534	-14.1975	0.00666634	-3.41145	0.665296	Gene Body	ENSSSCG00000040836	DCC
1	103577001	103578000	6.4704	0.126463	12.5333	0.0465516	-0.379404	0.872648	Intergenic	NA	NA
1	104567001	104568000	-4.56229	0.0926625	-1.43039	0.802953	-10.5118	0.0322447	Gene Body	ENSSSCG00000048492
1	105569001	105570000	-5.45039	0.0682054	-0.670543	0.861463	-10.5931	0.0090066	Intergenic	NA	NA
1	106510001	106511000	0.924489	0.841579	10.7843	0.0328361	-15.9074	0.00467459	Intergenic	NA	NA
1	106650001	106651000	-5.35551	0.21311	-12.2279	0.0183445	1.08616	0.836883	Intergenic	NA	NA
1	106828001	106829000	4.66661	0.239132	13.6339	0.0292662	-1.44377	0.837389	Intergenic	NA	NA
1	106927001	106928000	5.81943	0.124479	-1.27909	0.795949	13.1249	0.00138031	Promoter	ENSSSCG00000004542	NARS1
1	107115001	107116000	-4.76285	0.358934	3.15451	0.590363	-10.0884	0.00118873	Gene Body	ENSSSCG00000004545	ANKDD1A
1	107139001	107140000	8.38135	0.0366965	12.3663	0.0101376	4.05693	0.694382	Promoter	ENSSSCG00000004545	ANKDD1A
1	107146001	107147000	11.783	0.0352108	19.8299	0.00234375	1.55039	0.847093	Gene Body	ENSSSCG00000044010
1	107215001	107216000	6.40624	0.445207	-0.823045	0.826948	17.1917	0.0377253	Gene Body	ENSSSCG00000004547
1	107238001	107239000	-3.5026	0.554463	2.75692	0.660886	-11.3248	0.044079	Intergenic	NA	NA
1	107260001	107261000	-4.19769	0.617411	5.27702	0.517866	-17.8772	0.0142085	Promoter	ENSSSCG00000004549	RBPMS2
1	107312001	107313000	4.43101	0.449222	-3.45343	0.787088	13.257	0.0449954	Intergenic	NA	NA
1	107655001	107656000	-10.2339	0.00484573	-9.71612	0.0524173	-11.3058	0.150943	Promoter	ENSSSCG00000004552	TRIP4
1	107896001	107897000	-7.63825	0.0336982	-4.98481	0.605702	-12.4238	0.0226844	Promoter	ENSSSCG00000037275	SNX22
1	108415001	108416000	7.32036	0.011571	3.34236	0.532759	10.7834	0.00631704	Promoter	ENSSSCG00000040895
1	108721001	108722000	-9.97475	0.0107054	-12.6282	0.00627645	-7.13877	0.593684	Gene Body	ENSSSCG00000032949	APH1B
1	109014001	109015000	12.3015	0.011925	11.9438	0.0749752	13.3562	0.227045	Promoter	ENSSSCG00000004570	TPM1
1	109016001	109017000	7.36117	0.628698	-0.287685	0.202028	16.7295	0.0119655	Promoter	ENSSSCG00000004570	TPM1
1	109443001	109444000	-1.06006	0.759679	7.78995	0.135446	-10.7326	0.0193351	Gene Body	ENSSSCG00000024088	TLN2
1	109599001	109600000	-4.91611	0.0852579	-0.272139	0.915153	-12.124	0.00123066	Gene Body	ENSSSCG00000024088	TLN2
1	109827001	109828000	-3.15516	0.562928	-14.3331	0.00023455	12.6528	0.00707437	Promoter	ENSSSCG00000004572
1	110721001	110722000	8.34858	0.12448	-6.25	0.759358	21.6818	0.00103566	Promoter	ENSSSCG00000004576	RORA
1	110724001	110725000	-4.37423	0.401402	2.49819	0.60771	-11.1802	0.02242	Gene Body	ENSSSCG00000004576	RORA
1	110858001	110859000	-5.4979	0.205728	0.0670526	0.896892	-16.3654	0.0406602	Gene Body	ENSSSCG00000004576	RORA
1	111039001	111040000	-9.02087	0.00844268	-7.04939	0.343803	-13.399	0.0142941	Gene Body	ENSSSCG00000004576	RORA
1	111317001	111318000	-4.54283	0.462927	5.65725	0.60023	-15.3752	0.020488	Gene Body	ENSSSCG00000004576	RORA
1	111590001	111591000	10.9538	0.037345	18.2566	0.0318278	3.26208	0.544464	Promoter	ENSSSCG00000004578	ANXA2
1	112498001	112499000	-10.0089	0.0183414	-8.6504	0.680035	-11.219	0.0115726	Gene Body	ENSSSCG00000004584	GCNT3
1	112520001	112521000	12.4252	0.00187426	11.8586	0.036009	11.4706	0.0973084	Gene Body	ENSSSCG00000004584	GCNT3
1	112566001	112567000	-13.0527	0.00557082	-9.24114	0.29578	-15.1852	0.0177357	Gene Body	ENSSSCG00000004586	FAM81A
1	113084001	113085000	-4.39842	0.0637821	-13.0988	0.00021036	3.24129	0.65379	Promoter	ENSSSCG00000004592	SLTM
1	113509001	113510000	2.4113	0.701355	-6.12913	0.419888	14.0354	0.0160915	Gene Body	ENSSSCG00000004596	LIPC
1	113557001	113558000	4.27868	0.176805	-2.24612	0.901025	16.9392	0.00630996	Gene Body	ENSSSCG00000004596	LIPC
1	114386001	114387000	-4.66546	0.141684	-13.2172	0.00464054	2.93241	0.456403	Promoter	ENSSSCG00000004598
1	114435001	114436000	2.42216	0.464207	-4.87563	0.552129	14.0565	0.0136272	Gene Body	ENSSSCG00000035038	CGNL1
1	114478001	114479000	-5.15118	0.190079	-0.415784	0.894516	-15.5681	0.0238272	Gene Body	ENSSSCG00000035038	CGNL1
1	114599001	114600000	5.69346	0.207669	-1.73167	0.910635	15.044	0.0164981	Promoter	ENSSSCG00000035038	CGNL1
1	114659001	114660000	8.89209	0.00016953	11.6376	0.00043323	6.87018	0.222239	Promoter	ENSSSCG00000043361
1	115040001	115041000	8.84894	0.00688823	0.187011	0.880485	18.6759	7.5e-06	Gene Body	ENSSSCG00000004600	TCF12
1	115079001	115080000	7.85814	0.0865689	1.11709	0.839027	15.7792	0.0129328	Promoter	ENSSSCG00000026960
1	116133001	116134000	2.1109	0.237315	-3.10408	0.673851	13.0593	0.002811	Promoter	ENSSSCG00000035798	PRTG
1	116292001	116293000	5.91162	0.369753	15.0207	0.00192103	-3.68094	0.366224	Promoter	ENSSSCG00000004607	PYGO1
1	116535001	116536000	-6.74796	0.137299	-1.78145	0.858052	-12.1805	0.0326083	Promoter	ENSSSCG00000004612	RAB27A
1	116553001	116554000	5.62486	0.447745	14.7096	0.032271	-1.54828	0.649563	Gene Body	ENSSSCG00000004612	RAB27A
1	116952001	116953000	-11.329	0.107689	-18.812	0.0153341	-3.26075	0.879923	Intergenic	NA	NA
1	117640001	117641000	-10.0759	0.0450417	-16.7157	0.00871353	-2.68468	0.760308	Gene Body	ENSSSCG00000004614	UNC13C
1	117993001	117994000	6.85704	0.00705526	2.97017	0.492692	12.2367	0.00068779	Gene Body	ENSSSCG00000004615	WDR72
1	118577001	118578000	-5.64882	0.0291288	-1.39103	0.78981	-10.7217	0.00162436	Intergenic	NA	NA
1	119022001	119023000	-5.72854	0.101725	-14.5509	0.00025619	4.8923	0.53203	Promoter	ENSSSCG00000004617	FAM214A
1	119052001	119053000	10.4165	0.015249	12.294	0.0937627	8.97134	0.198638	Promoter	ENSSSCG00000004617	FAM214A
1	119932001	119933000	-6.5879	0.0176454	-11.118	0.0100379	-2.05992	0.520787	Gene Body	ENSSSCG00000004626	TMOD3
1	120089001	120090000	3.05135	0.559269	-8.67191	0.0242871	13.5737	1.48e-05	Promoter	ENSSSCG00000004630	SCG3
1	120090001	120091000	7.8689	0.264331	0.497821	0.857475	15.7292	0.0300352	Promoter	ENSSSCG00000004630	SCG3
1	121067001	121068000	-0.0957532	0.582273	-14.6996	0.0001656	7.88908	0.0943607	Promoter	ENSSSCG00000004635	SPPL2A
1	121178001	121179000	-4.15517	0.0723083	1.07895	0.74027	-11.5723	0.0488765	Gene Body	ENSSSCG00000004636	TRPM7
1	121578001	121579000	10.8575	4.45e-07	12.387	0.0001335	10.5351	0.0128598	Promoter	ENSSSCG00000004643	SLC27A2
1	121657001	121658000	-14.5154	1.97e-05	-18.9414	0.00046614	-8.45968	0.0968975	Gene Body	ENSSSCG00000004646	ATP8B4
1	122748001	122749000	6.18226	0.462999	-2.04364	0.479638	11.335	0.0435883	Gene Body	ENSSSCG00000004657	CEP152
1	122811001	122812000	2.30346	0.576052	-6.50128	0.343603	11.6365	0.008957	Promoter	ENSSSCG00000004656
1	124702001	124703000	2.78186	0.62423	-5.1401	0.551115	11.4575	0.0489968	Intergenic	NA	NA
1	126136001	126137000	2.9242	0.55493	-7.61404	0.158928	16.6697	0.00077532	Promoter	ENSSSCG00000004666
1	126185001	126186000	-5.2007	0.68094	-17.0612	0.00955675	10.211	0.0965558	Promoter	ENSSSCG00000037384	BLOC1S6
1	126344001	126345000	-5.28104	0.346271	-13.7011	0.0383672	2.54177	0.759051	Intergenic	NA	NA
1	126361001	126362000	-0.65771	0.705472	-10.4815	0.00146855	9.23788	0.0265963	Promoter	ENSSSCG00000004672	GATM
1	126523001	126524000	-11.3568	0.0486875	-12.7904	0.344004	-5.59108	0.0967659	Intergenic	NA	NA
1	126597001	126598000	6.29075	0.0435254	2.95919	0.613282	11.4477	0.012589	Gene Body	ENSSSCG00000004675	DUOX1
1	126618001	126619000	-3.74028	0.730128	-10.2178	0.0419939	7.84423	0.208611	Promoter	ENSSSCG00000004675	DUOX1
1	126767001	126768000	8.61059	0.0201624	4.04384	0.664551	16.7112	0.00232258	Promoter	ENSSSCG00000004680	TERB2
1	126827001	126828000	6.50333	0.00109192	2.19556	0.647045	10.3142	5.56e-05	Intergenic	NA	NA
1	127929001	127930000	-12.255	0.0002106	-14.5223	0.0102577	-10.5712	0.0604321	Promoter	ENSSSCG00000004705	MAP1A
1	128126001	128127000	3.00296	0.515802	-2.03213	0.439652	10.1372	0.0119061	Promoter	ENSSSCG00000004710	ADAL
1	128188001	128189000	-7.12451	0.0810525	-16.2698	0.0234191	-2.10852	0.788008	Intergenic	NA	NA
1	128319001	128320000	8.31426	0.0346689	0.490196	0.903984	19.0104	0.0002145	Promoter	ENSSSCG00000004717	UBR1
1	128642001	128643000	-13.2964	0.0204705	-14.9742	0.0267392	-7.63557	0.509335	Promoter	ENSSSCG00000004719	CDAN1
1	129053001	129054000	-3.3573	0.355771	-12.9103	0.00362572	5.36232	0.476819	Gene Body	ENSSSCG00000004729
1	129169001	129170000	-8.94711	0.0195822	-5.44069	0.735724	-11.7204	0.0121848	Gene Body	ENSSSCG00000004731	VPS39
1	129378001	129379000	-11.9411	0.00195903	-10.796	0.11447	-13.3861	0.0339614	Gene Body	ENSSSCG00000020666	EHD4
1	129471001	129472000	-12.5133	9.97e-05	-15.416	0.00142878	-7.60161	0.132502	Gene Body	ENSSSCG00000004736	SPTBN5
1	129550001	129551000	4.14906	0.591725	-2.91486	0.659824	16.6667	0.0318532	Gene Body	ENSSSCG00000004738	MAPKBP1
1	129772001	129773000	7.1947	0.0023796	-1.10294	0.847841	17.5505	1.36e-06	Intergenic	NA	NA
1	129784001	129785000	-8.73437	0.0259856	-12.5495	0.0188118	-4.20556	0.589002	Intergenic	NA	NA
1	129861001	129862000	2.95625	0.483367	-7.15134	0.247709	12.8329	0.00062554	Intergenic	NA	NA
1	129882001	129883000	-5.53282	0.226048	-15.6392	0.00659231	4.63525	0.608552	Intergenic	NA	NA
1	130091001	130092000	-6.44842	0.00055139	-10.3548	0.0001146	-1.49371	0.542579	Gene Body	ENSSSCG00000004751	CHP1
1	130093001	130094000	7.48193	0.431619	-4.42025	0.689793	15.8163	0.0480453	Gene Body	ENSSSCG00000004751	CHP1
1	130340001	130341000	-13.6309	0.00097162	-10.0603	0.0677976	-20.2495	0.0126602	Gene Body	ENSSSCG00000004753	INO80
1	130362001	130363000	3.65487	0.519626	-3.92025	0.47398	10.7305	0.0354358	Promoter	ENSSSCG00000038521	CHAC1
1	130384001	130385000	14.5634	1.73e-05	5.98981	0.502681	26.0881	1.87e-07	Promoter	ENSSSCG00000004755	DLL4
1	130389001	130390000	10.7185	0.00467635	7.63907	0.208103	12.1215	0.0330509	Intergenic	NA	NA
1	130410001	130411000	-9.70331	0.00951518	-13.5519	0.0207873	-5.72446	0.362642	Gene Body	ENSSSCG00000004757	VPS18
1	130527001	130528000	13.7039	0.023589	12.9652	0.0339095	15.7059	0.619454	Gene Body	ENSSSCG00000004762	DNAJC17
1	130564001	130565000	11.8315	1.36e-05	17.9148	0.00017674	5.98149	0.129986	Promoter	ENSSSCG00000032022	GCHFR
1	130940001	130941000	-3.71673	0.227076	3.00301	0.616271	-12.3073	0.00123452	Promoter	ENSSSCG00000004774	IVD
1	131511001	131512000	6.23529	0.205877	-0.879177	0.890659	16.0431	0.00924594	Promoter	ENSSSCG00000040418	FSIP1
1	132704001	132705000	-13.4207	0.11033	-14.6013	0.0436208	-12.2093	0.813167	Promoter	ENSSSCG00000004791	RASGRP1
1	132731001	132732000	-10.9865	0.0214146	-11.9274	0.0422429	-6.00733	0.444013	Gene Body	ENSSSCG00000004791	RASGRP1
1	133362001	133363000	-9.05157	0.00493234	-10.7873	0.0259864	-7.29954	0.235909	Intergenic	NA	NA
1	133756001	133757000	-6.24483	0.196253	3.3514	0.664403	-14.9673	0.00481031	Intergenic	NA	NA
1	134242001	134243000	-5.2246	0.277163	2.08145	0.807346	-11.1056	0.0307803	Intergenic	NA	NA
1	134315001	134316000	-6.29654	0.13412	-10.0962	0.03363	0.429583	0.905213	Gene Body	ENSSSCG00000026900	C15orf41
1	135338001	135339000	-4.09929	0.2428	0.936253	0.913776	-12.0722	0.0206792	Intergenic	NA	NA
1	136135001	136136000	9.45818	0.00019294	8.90664	0.0639234	10.2454	0.0074909	Gene Body	ENSSSCG00000004802	AQR
1	136526001	136527000	11.263	0.00513939	15.1952	0.0120674	7.08528	0.332563	Promoter	ENSSSCG00000004807	SCG5
1	137120001	137121000	-15.2711	1.06e-08	-15.5223	0.00046651	-23.5532	0.00022228	Promoter	ENSSSCG00000040466
1	137164001	137165000	11.5085	0.00408857	10.1133	0.169344	13.2556	0.0361145	Intergenic	NA	NA
1	137282001	137283000	7.03567	0.309311	-1.09317	0.728607	14.8447	0.00879815	Gene Body	ENSSSCG00000027232
1	137476001	137477000	-0.0452796	0.883922	-8.50358	0.248439	12.9283	0.04213	Gene Body	ENSSSCG00000030560	IGF1R
1	137545001	137546000	-11.5727	0.00032708	-11.1753	0.0469063	-11.9125	0.0210821	Gene Body	ENSSSCG00000030560	IGF1R
1	137581001	137582000	-3.7562	0.322186	-14.1286	0.00535072	6.69848	0.483722	Gene Body	ENSSSCG00000030560	IGF1R
1	137587001	137588000	1.02688	0.779604	9.5718	0.0899244	-14.7064	0.0440847	Gene Body	ENSSSCG00000030560	IGF1R
1	138257001	138258000	-9.96474	0.00022668	-9.82249	0.0401129	-10.7421	0.011834	Gene Body	ENSSSCG00000042776
1	138258001	138259000	4.39774	0.520413	-8.1136	0.525899	12.5815	0.00271967	Gene Body	ENSSSCG00000042776
1	138267001	138268000	-4.87947	0.243521	0.0899464	0.899464	-10.3644	0.0326083	Intergenic	NA	NA
1	138524001	138525000	7.11063	9.8e-06	3.57608	0.225672	10.2914	9.69e-06	Intergenic	NA	NA
1	138915001	138916000	6.58798	0.00041657	12.5445	1.75e-08	0.458668	0.894779	Gene Body	ENSSSCG00000038452	ADAMTS17
1	138981001	138982000	13.7661	0.00052974	17.6167	0.00171625	10.0001	0.238284	Gene Body	ENSSSCG00000038452	ADAMTS17
1	139190001	139191000	9.65369	0.00289581	11.1807	0.0283112	7.30115	0.170474	Promoter	ENSSSCG00000004820	LINS1
1	139495001	139496000	-2.49113	0.562686	-13.8303	0.0269729	12.7738	0.227157	Promoter	ENSSSCG00000004823	LRRK1
1	139654001	139655000	-10.1926	0.013855	-6.50755	0.480833	-13.4994	0.0164387	Intergenic	NA	NA
1	139659001	139660000	7.42982	0.148715	13.9395	0.0436104	0.0646564	0.905595	Intergenic	NA	NA
1	139809001	139810000	-0.948288	0.862666	-10.4739	0.18229	10.8985	0.0464667	Intergenic	NA	NA
1	139837001	139838000	-2.48688	0.455925	-16.577	0.0106572	8.75632	0.410025	Promoter	ENSSSCG00000004826	SELENOS
1	140672001	140673000	-7.22461	0.0465142	-2.86748	0.719259	-11.33	0.016491	Gene Body	ENSSSCG00000038547	GABRB3
1	141443001	141444000	-4.93778	0.267277	-16.1243	0.00216917	6.19193	0.542064	Intergenic	NA	NA
1	141729001	141730000	-8.59599	0.240475	-2.2326	0.89228	-17.4853	0.0331646	Intergenic	NA	NA
1	141886001	141887000	2.61751	0.571914	-5.80032	0.207854	10.6118	0.00686042	Promoter	ENSSSCG00000004831
1	142278001	142279000	0.0763535	0.896173	-11.1762	0.185995	18.1391	0.0263709	Intergenic	NA	NA
1	142294001	142295000	7.55873	0.193574	14.4732	0.0240064	-6.42042	0.544413	Intergenic	NA	NA
1	142763001	142764000	-4.47364	0.370219	0.346239	0.828564	-10.8013	0.021581	Intergenic	NA	NA
1	142915001	142916000	-4.40823	0.229018	1.91942	0.80421	-11.9233	0.0048878	Gene Body	ENSSSCG00000004839
1	143415001	143416000	-1.88784	0.748037	-10.1312	0.0397687	5.90453	0.203021	Gene Body	ENSSSCG00000004840	OTUD7A
1	143519001	143520000	14.0102	0.00333614	7.57178	0.532325	21.6266	0.00088344	Gene Body	ENSSSCG00000026006	KLF13
1	143595001	143596000	-9.03373	0.0045102	-0.323783	0.902537	-16.4956	0.00081468	Gene Body	ENSSSCG00000048005
1	143627001	143628000	6.74153	0.0631891	-1.08057	0.897357	17.3807	0.00205614	Gene Body	ENSSSCG00000038208
1	143631001	143632000	7.10823	0.269217	-2.56564	0.91174	19.4698	0.0097508	Gene Body	ENSSSCG00000038208
1	143868001	143869000	5.72401	0.0515091	-0.563325	0.885181	14.3529	0.00040762	Promoter	ENSSSCG00000004844	MTMR10
1	143960001	143961000	-5.82292	0.199292	-10.7414	0.00967691	1.4577	0.565329	Promoter	ENSSSCG00000004845	FAN1
1	144316001	144317000	-4.15493	0.394455	0.542727	0.765691	-11.9784	0.0069255	Gene Body	ENSSSCG00000004850	FAM189A1
1	145360001	145361000	6.39346	0.012359	1.751	0.585205	11.9579	0.00483279	Promoter	ENSSSCG00000005782	TM2D3
1	145748001	145749000	2.15875	0.537552	14.3322	0.00032477	-7.28671	0.200905	Promoter	ENSSSCG00000047496
1	145824001	145825000	-10.5349	1.29e-05	-9.70386	0.00988538	-11.709	0.00671788	Intergenic	NA	NA
1	145842001	145843000	6.30891	0.00596246	1.86735	0.713129	10.6231	0.00031536	Intergenic	NA	NA
1	145879001	145880000	6.31795	0.116109	12.8959	0.0138151	0.826409	0.894321	Promoter	ENSSSCG00000037335
1	145915001	145916000	-8.82813	0.00530692	-7.75474	0.182854	-10.6383	0.0423523	Gene Body	ENSSSCG00000004856	NFATC1
1	145978001	145979000	-6.99064	0.314119	-17.2762	0.00564317	3.28407	0.591929	Gene Body	ENSSSCG00000004856	NFATC1
1	146005001	146006000	-10.5143	0.0191761	-7.00947	0.0839774	-15.2968	0.286216	Promoter	ENSSSCG00000004856	NFATC1
1	146016001	146017000	-8.35168	0.0297118	-13.2393	0.00434712	-1.53265	0.837602	Promoter	ENSSSCG00000004856	NFATC1
1	146020001	146021000	6.53437	0.33792	17.4712	0.0330373	-6.81605	0.503954	Intergenic	NA	NA
1	146424001	146425000	-11.3304	0.0256809	-10.6111	0.28502	-14.3796	0.100501	Intergenic	NA	NA
1	146490001	146491000	-6.67626	0.0453903	-3.04425	0.696248	-10.7132	0.0264399	Intergenic	NA	NA
1	146705001	146706000	-7.70495	0.00526996	-4.91299	0.359403	-15.2075	0.00444084	Intergenic	NA	NA
1	146838001	146839000	4.75722	0.205805	-1.1534	0.825712	11.1789	0.00829494	Intergenic	NA	NA
1	146938001	146939000	5.03941	0.0720626	10.0328	0.0403718	0.56769	0.737383	Intergenic	NA	NA
1	146939001	146940000	7.68612	0.045838	4.18405	0.674727	12.6216	0.0100488	Intergenic	NA	NA
1	147039001	147040000	6.60712	0.00695282	10.4768	0.0109125	3.19295	0.334427	Intergenic	NA	NA
1	147579001	147580000	7.37286	0.0289864	2.95533	0.742214	12.6909	0.002811	Gene Body	ENSSSCG00000038767	MBP
1	147589001	147590000	2.49128	0.695066	-7.12481	0.399015	14.1248	0.0181331	Gene Body	ENSSSCG00000038767	MBP
1	147609001	147610000	-7.70443	0.0526975	-16.399	0.0283515	-9.76096	0.76066	Gene Body	ENSSSCG00000038767	MBP
1	147611001	147612000	-12.1349	0.0271366	-7.99529	0.467477	-17.182	0.0344712	Gene Body	ENSSSCG00000038767	MBP
1	147646001	147647000	7.73446	0.170589	-2.92659	0.725341	15.184	0.0182865	Gene Body	ENSSSCG00000038767	MBP
1	147674001	147675000	-7.73257	0.152954	-2.46038	0.828838	-13.8885	0.0458023	Gene Body	ENSSSCG00000038767	MBP
1	147982001	147983000	-5.41201	0.149514	-10.6201	0.0239228	-0.13125	0.883689	Promoter	ENSSSCG00000004859	ZNF516
1	148029001	148030000	-8.04289	0.0405042	-2.43559	0.745678	-13.9924	0.0036042	Gene Body	ENSSSCG00000004859	ZNF516
1	148066001	148067000	-5.27421	0.256533	-14.8013	8.81e-06	7.11904	0.0981565	Gene Body	ENSSSCG00000004859	ZNF516
1	148084001	148085000	-0.0314793	0.781914	10.8451	0.145817	-10.7438	0.0069801	Gene Body	ENSSSCG00000004859	ZNF516
1	148376001	148377000	-9.18227	0.180226	-0.40293	0.900912	-16.2089	0.0312685	Intergenic	NA	NA
1	148663001	148664000	-5.13164	0.151919	-1.4736	0.841119	-10.0173	0.0370501	Intergenic	NA	NA
1	148677001	148678000	-10.6175	0.00039106	-7.88504	0.242906	-13.1478	0.0011634	Promoter	ENSSSCG00000041065
1	148725001	148726000	-6.16809	0.166915	-0.840474	0.889887	-11.542	0.0126287	Intergenic	NA	NA
1	148744001	148745000	-5.77733	0.144695	-0.757779	0.893743	-12.576	0.00955105	Intergenic	NA	NA
1	148998001	148999000	-5.95572	0.198923	-0.306862	0.892506	-11.504	0.0404102	Gene Body	ENSSSCG00000032488	ZADH2
1	149100001	149101000	7.93635	0.037556	6.29371	0.507796	10.2884	0.0439943	Gene Body	ENSSSCG00000033971	ZNF407
1	149550001	149551000	-4.76238	0.0878636	-10.4591	0.00136379	1.18587	0.834345	Promoter	ENSSSCG00000004869	CNDP1
1	150039001	150040000	11.2024	0.00473677	14.8614	0.00704583	6.69516	0.418323	Intergenic	NA	NA
1	150435001	150436000	-5.10822	0.305702	0.790286	0.808261	-13.63	0.0409571	Promoter	ENSSSCG00000041473
1	150976001	150977000	-9.16118	0.0300107	-13.2514	0.0450908	-5.09732	0.456687	Promoter	ENSSSCG00000020859	CBLN2
1	152482001	152483000	9.92784	2.27e-07	4.54732	0.207897	20.2242	1.56e-07	Intergenic	NA	NA
1	152635001	152636000	-4.43186	0.0355617	-10.7978	0.00222333	2.07516	0.835945	Promoter	ENSSSCG00000032214	SOCS6
1	152883001	152884000	-15.7909	0.00697944	-4.49416	0.883621	-23.3645	0.00038098	Promoter	ENSSSCG00000038398	CD226
1	152898001	152899000	6.72192	0.118343	-0.533216	0.882643	16.6831	0.00458561	Gene Body	ENSSSCG00000038398	CD226
1	153186001	153187000	-6.85733	0.0312749	-10.7639	0.0176766	-2.98411	0.635	Gene Body	ENSSSCG00000028977	DOK6
1	153435001	153436000	-9.1262	1.82e-08	-4.06772	0.190903	-14.229	1.36e-08	Intergenic	NA	NA
1	153617001	153618000	-0.852658	0.767007	6.14924	0.281082	-11.7421	0.0248932	Intergenic	NA	NA
1	154828001	154829000	-5.78549	0.0728455	-1.18725	0.778799	-12.0303	0.0181285	Intergenic	NA	NA
1	156329001	156330000	7.98942	0.0593434	11.1198	0.0378527	3.70123	0.669642	Gene Body	ENSSSCG00000004886	CDH7
1	156344001	156345000	-4.99342	0.181943	0.933527	0.756684	-10.5261	0.00266015	Gene Body	ENSSSCG00000004886	CDH7
1	157447001	157448000	4.59163	0.27649	10.964	0.00257084	-3.70148	0.215939	Intergenic	NA	NA
1	158343001	158344000	-7.93744	0.0392127	-3.15525	0.672889	-12.8066	0.00872173	Gene Body	ENSSSCG00000025744	KDSR
1	158416001	158417000	-9.03491	0.144064	-2.45902	0.881806	-16.5271	0.0219663	Gene Body	ENSSSCG00000025744	KDSR
1	158515001	158516000	-5.73341	0.357918	-10.8795	0.0239047	2.65054	0.563623	Gene Body	ENSSSCG00000025744	KDSR
1	159143001	159144000	5.73499	0.275517	11.5739	0.0248225	-2.88492	0.685711	Gene Body	ENSSSCG00000004898	TNFRSF11A
1	159164001	159165000	-5.68981	0.326724	-13.4139	0.0465656	2.67967	0.761765	Gene Body	ENSSSCG00000004898	TNFRSF11A
1	159318001	159319000	12.6756	0.0003949	7.61218	0.387118	17.6871	0.00012487	Promoter	ENSSSCG00000004899	RELCH
1	159529001	159530000	10.0992	0.0543815	4.76905	0.76869	17.7812	0.00755225	Promoter	ENSSSCG00000004902	RNF152
1	159572001	159573000	-6.62302	0.101662	-2.69455	0.726336	-11.2582	0.0433031	Gene Body	ENSSSCG00000004902	RNF152
1	159593001	159594000	5.32865	0.537356	-0.0436414	0.832173	15.4777	0.0324665	Gene Body	ENSSSCG00000004902	RNF152
1	159618001	159619000	-11.6189	0.0425736	-10.2483	0.298204	-13.0352	0.157289	Promoter	ENSSSCG00000034988
1	161206001	161207000	-9.34365	0.0344502	-6.86352	0.614309	-11.8713	0.0332651	Intergenic	NA	NA
1	161322001	161323000	-4.22109	0.250938	-14.6079	0.00211886	4.3512	0.485339	Promoter	ENSSSCG00000004907	CCBE1
1	161768001	161769000	0.240183	0.851741	-8.34555	0.229995	12.6079	0.0434025	Promoter	ENSSSCG00000004912	SEC11C
1	161800001	161801000	-10.2537	0.0464357	-10.0659	0.136916	-11.0405	0.346052	Gene Body	ENSSSCG00000004911
1	162243001	162244000	-2.38095	0.77452	6.31929	0.251057	-12.3676	0.0272991	Gene Body	ENSSSCG00000004918	ALPK2
1	162389001	162390000	-5.04016	0.0768132	-1.21932	0.828255	-11.5982	0.00560451	Gene Body	ENSSSCG00000004919	NEDD4L
1	162465001	162466000	-7.84947	0.0568018	-13.8076	0.00013809	4.05653	0.490228	Gene Body	ENSSSCG00000004919	NEDD4L
1	162485001	162486000	-7.40721	0.057251	-4.19384	0.66654	-10.7728	0.0144264	Gene Body	ENSSSCG00000004919	NEDD4L
1	162535001	162536000	-4.3429	0.0781883	-0.355482	0.896505	-12.8707	0.00108089	Gene Body	ENSSSCG00000004919	NEDD4L
1	162613001	162614000	10.2747	0.0385376	10.8922	0.145507	10.2671	0.305385	Gene Body	ENSSSCG00000004919	NEDD4L
1	162778001	162779000	-6.12491	0.07338	0.379404	0.822938	-10.7505	0.00305632	Intergenic	NA	NA
1	162869001	162870000	6.10985	0.00247641	11.4104	1.92e-05	0.440792	0.845142	Intergenic	NA	NA
1	163525001	163526000	4.68489	0.488898	-3.66154	0.42035	13.139	0.00423442	Promoter	ENSSSCG00000004935	HACD3
1	163718001	163719000	-7.84673	0.112766	-12.0844	0.00307601	-0.114668	0.38203	Gene Body	ENSSSCG00000004938	DENND4A
1	163829001	163830000	1.3053	0.808477	10.0502	0.00863509	-9.93581	0.00695956	Gene Body	ENSSSCG00000044382
1	164194001	164195000	6.47341	0.198221	0.523156	0.88302	11.8432	0.0228006	Gene Body	ENSSSCG00000004939	MEGF11
1	164202001	164203000	-13.5376	0.0236011	-11.3603	0.19101	-12.8277	0.157758	Gene Body	ENSSSCG00000004939	MEGF11
1	164222001	164223000	-6.2726	0.0754617	-11.607	0.0189035	-1.91904	0.771579	Gene Body	ENSSSCG00000004939	MEGF11
1	164311001	164312000	4.63296	0.800156	-3.256	0.216602	13.27	0.0164098	Promoter	ENSSSCG00000004941	DIS3L
1	164369001	164370000	0.950006	0.66516	-8.89306	0.00330671	17.3779	1.06e-06	Promoter	ENSSSCG00000004942	TIPIN
1	164720001	164721000	-4.31095	0.0495627	-11.0166	0.0490353	-2.90386	0.554029	Gene Body	ENSSSCG00000004948	SMAD6
1	164754001	164755000	-7.70026	0.071375	-2.38878	0.732651	-15.5786	0.031141	Gene Body	ENSSSCG00000050768
1	165016001	165017000	-5.47183	0.0392733	1.08765	0.852971	-14.601	0.00020077	Gene Body	ENSSSCG00000004952	SMAD3
1	165043001	165044000	-3.39845	0.10506	6.13971	0.828575	-10.9975	0.0350927	Gene Body	ENSSSCG00000004952	SMAD3
1	165073001	165074000	-6.31318	0.0549262	-12.8055	0.0131467	-0.374504	0.789843	Gene Body	ENSSSCG00000004952	SMAD3
1	165116001	165117000	-9.96473	0.0320449	-14.7729	0.046197	-5.44071	0.509367	Gene Body	ENSSSCG00000004952	SMAD3
1	165193001	165194000	7.28508	0.00884648	-2.57559	0.776024	15.8006	3.78e-07	Promoter	ENSSSCG00000004951	AAGAB
1	165254001	165255000	-5.60203	0.0308996	-1.46705	0.799085	-10.7904	0.00306993	Gene Body	ENSSSCG00000004951	AAGAB
1	165436001	165437000	15.983	1.75e-17	12.9795	0.00013999	19.8648	3.79e-13	Promoter	ENSSSCG00000004951	AAGAB
1	165775001	165776000	4.70523	0.125288	-1.85448	0.918813	15.2061	0.00545151	Intergenic	NA	NA
1	165956001	165957000	7.48499	0.227871	-0.596175	0.824945	17.4137	0.00674337	Promoter	ENSSSCG00000004958	PIAS1
1	166099001	166100000	-9.54383	0.0739097	-5.91133	0.75923	-14.2376	0.0310022	Promoter	ENSSSCG00000026517	CALML4
1	166217001	166218000	11.0924	0.00274528	11.3876	0.0107333	10.4566	0.1812	Gene Body	ENSSSCG00000004961	ITGA11
1	166442001	166443000	-11.8009	0.0064176	-14.8611	0.0231721	-8.2264	0.237895	Intergenic	NA	NA
1	166444001	166445000	-6.24568	0.0114363	-1.43761	0.413073	-21.7187	0.00483215	Intergenic	NA	NA
1	166614001	166615000	-4.26791	0.0823201	0.356757	0.870035	-10.7963	0.00346764	Intergenic	NA	NA
1	166943001	166944000	-4.44106	0.0760376	-10.2934	0.0376879	0.526895	0.761445	Gene Body	ENSSSCG00000040442
1	167036001	167037000	-3.67757	0.523803	6.00639	0.441599	-10.6098	0.0141818	Gene Body	ENSSSCG00000026078	GLCE
1	167177001	167178000	-10.3714	0.0672221	-14.5379	0.0291061	-3.53535	0.774606	Gene Body	ENSSSCG00000004968	PAQR5
1	167239001	167240000	5.15467	0.169613	17.5114	0.00214253	-8.63202	0.586224	Promoter	ENSSSCG00000004969	KIF23
1	167465001	167466000	-11.7312	0.0109016	-8.98826	0.355624	-15.5487	0.0239129	Intergenic	NA	NA
1	167488001	167489000	-11.9337	0.0075655	-5.15712	0.836921	-21.6089	7.3e-05	Intergenic	NA	NA
1	167605001	167606000	7.91155	0.0159707	10.2763	0.0293131	5.68117	0.469789	Gene Body	ENSSSCG00000037389
1	167774001	167775000	-8.15484	0.0334118	0.313615	0.883665	-19.3651	0.00153616	Gene Body	ENSSSCG00000037389
1	167790001	167791000	10.4344	0.00166408	3.17829	0.400784	21.5842	0.00088874	Intergenic	NA	NA
1	167808001	167809000	-9.93848	0.0188183	-6.57191	0.619505	-17.2901	0.00191061	Gene Body	ENSSSCG00000004971	TLE3
1	167904001	167905000	0.810909	0.801595	10.4701	0.0368815	-7.38504	0.195783	Intergenic	NA	NA
1	167944001	167945000	2.41186	0.207445	10.1269	0.0259286	-2.44271	0.499283	Intergenic	NA	NA
1	167971001	167972000	-4.79508	0.140696	1.37426	0.887746	-13.0556	0.0112551	Intergenic	NA	NA
1	167990001	167991000	-7.67536	0.0511562	-6.0682	0.620028	-12.3967	0.0376492	Intergenic	NA	NA
1	167994001	167995000	14.0162	7.08e-06	16.2295	0.00846796	14.3132	0.00379766	Intergenic	NA	NA
1	168071001	168072000	-10.3653	0.00014348	-12.546	0.00269304	-7.75345	0.106655	Promoter	ENSSSCG00000049162
1	168072001	168073000	-11.5492	6.4e-05	-12.515	0.0213457	-10.3258	0.012448	Promoter	ENSSSCG00000049162
1	168123001	168124000	-6.95671	0.0769993	-3.24937	0.703591	-13.0003	0.0452898	Intergenic	NA	NA
1	168226001	168227000	-12.1651	0.0132948	-8.34725	0.0470563	-14.4253	0.307915	Intergenic	NA	NA
1	168377001	168378000	-8.3951	0.0911412	-1.94378	0.864284	-15.5903	0.00668442	Gene Body	ENSSSCG00000004973	UACA
1	168901001	168902000	-2.28842	0.606772	4.02132	0.451491	-10.8141	0.0230449	Gene Body	ENSSSCG00000004980	THSD4
1	169018001	169019000	5.48185	0.110189	-0.833525	0.881406	13.0625	0.00594315	Gene Body	ENSSSCG00000004980	THSD4
1	169178001	169179000	3.97803	0.200367	-0.949909	0.826186	11.0584	0.0393448	Gene Body	ENSSSCG00000004980	THSD4
1	169223001	169224000	-3.79653	0.195059	4.11687	0.718578	-10.5914	0.00266449	Gene Body	ENSSSCG00000004980	THSD4
1	169933001	169934000	7.14701	0.0298433	0.164862	0.865238	12.7123	0.00328828	Intergenic	NA	NA
1	170137001	170138000	6.77952	0.126431	-0.0817448	0.7718	14.3058	0.0412436	Gene Body	ENSSSCG00000041595
1	171267001	171268000	-8.46935	0.0194681	-6.21795	0.289832	-10.7128	0.0409619	Gene Body	ENSSSCG00000044677
1	171953001	171954000	10.0345	0.0197015	5.28761	0.531653	16.6315	0.0109982	Gene Body	ENSSSCG00000004990	LRFN5
1	172206001	172207000	-5.79107	0.0298962	-2.40231	0.63818	-10.5493	0.0252803	Intergenic	NA	NA
1	174041001	174042000	-1.03849	0.750104	8.45752	0.230939	-11.3081	0.0088705	Intergenic	NA	NA
1	174247001	174248000	-4.95606	0.14768	-0.161607	0.885806	-11.2869	0.00436636	Intergenic	NA	NA
1	175145001	175146000	0.599189	0.760175	-11.1587	0.0817018	13.1777	0.00802321	Promoter	ENSSSCG00000030679	C14orf28
1	176883001	176884000	5.68107	0.259166	1.2252	0.873841	13.3077	0.0334884	Gene Body	ENSSSCG00000005002	MDGA2
1	177136001	177137000	6.56954	0.0228181	2.82326	0.647339	10.1274	0.00610366	Gene Body	ENSSSCG00000005002	MDGA2
1	177307001	177308000	-5.38478	0.298091	0.923136	0.813746	-13.1731	0.00292069	Gene Body	ENSSSCG00000005002	MDGA2
1	177343001	177344000	-5.98554	0.00659038	-1.61384	0.691637	-11.7108	0.00036364	Gene Body	ENSSSCG00000005002	MDGA2
1	179381001	179382000	7.88469	0.0748087	20.2748	0.00885773	2.93514	0.893124	Intergenic	NA	NA
1	179491001	179492000	1.69581	0.771728	-8.0576	0.113791	17.8393	0.00537426	Gene Body	ENSSSCG00000005008	DNAAF2
1	179712001	179713000	3.11118	0.090831	-2.84122	0.43163	10.6847	3.73e-05	Promoter	ENSSSCG00000005012	ARF6
1	179810001	179811000	23.1165	2.25e-05	24.179	0.00064978	19.9238	0.106324	Promoter	ENSSSCG00000049234
1	180487001	180488000	7.10898	0.00019341	4.64148	0.247892	10.0103	0.00023795	Gene Body	ENSSSCG00000005022	NIN
1	180698001	180699000	-7.42098	0.00026469	-2.9589	0.622462	-12.5187	1.42e-06	Promoter	ENSSSCG00000005024	PYGL
1	180704001	180705000	10.1829	0.0077991	11.623	0.0447878	7.67936	0.242136	Promoter	ENSSSCG00000005024	PYGL
1	181337001	181338000	6.63578	0.0218306	4.53931	0.457143	13.5752	0.023563	Promoter	ENSSSCG00000005027	FRMD6
1	181486001	181487000	-6.39536	0.11838	-13.1085	0.0489954	0.199752	0.847221	Promoter	ENSSSCG00000028092
1	181662001	181663000	5.12715	0.161374	-1.8517	0.890615	16.5764	0.0099382	Intergenic	NA	NA
1	181996001	181997000	-6.01184	0.172023	9.56263	0.0163975	-20.7816	6.42e-07	Gene Body	ENSSSCG00000021862	PTGER2
1	182979001	182980000	6.06495	0.37213	16.0089	0.0249574	-4.9011	0.465799	Gene Body	ENSSSCG00000051102
1	183641001	183642000	2.87986	0.0254684	0.64682	0.911354	11.5947	0.00041768	Gene Body	ENSSSCG00000005045	BMP4
1	183670001	183671000	7.02572	0.16528	15.5054	0.00499318	-4.11985	0.481681	Gene Body	ENSSSCG00000005045	BMP4
1	183972001	183973000	-10.5039	0.0357849	-1.59146	0.592467	-15.9116	0.0242305	Gene Body	ENSSSCG00000023408	SAMD4A
1	184155001	184156000	-2.06396	0.897678	-25.0036	5.67e-09	25.9062	4.12e-14	Intergenic	NA	NA
1	185748001	185749000	5.83527	0.238213	11.914	0.0152938	-3.41669	0.573524	Intergenic	NA	NA
1	185935001	185936000	-5.72067	0.23851	-11.0205	0.0423034	0.887874	0.840736	Intergenic	NA	NA
1	186183001	186184000	-6.11621	0.0329011	-1.89326	0.733639	-10.5225	0.00758403	Promoter	ENSSSCG00000045874
1	186598001	186599000	-4.35324	0.250106	1.94243	0.767501	-11.1672	0.00756624	Gene Body	ENSSSCG00000005067	CCDC198
1	187260001	187261000	-10.7205	0.00153944	-11.6946	0.025318	-9.88912	0.121634	Promoter	ENSSSCG00000005071	ARMH4
1	187474001	187475000	-3.8326	0.737886	8.75963	0.0505765	-15.7317	0.00458385	Promoter	ENSSSCG00000005075	TOMM20L
1	188485001	188486000	-5.15382	0.088667	1.90499	0.706234	-13.5507	3.3e-05	Gene Body	ENSSSCG00000005078	DAAM1
1	188849001	188850000	-5.12013	0.185686	0.567652	0.868711	-11.4404	0.0324112	Gene Body	ENSSSCG00000025013	RTN1
1	189331001	189332000	-5.64886	0.187075	1.67402	0.917063	-18.67	0.0213679	Gene Body	ENSSSCG00000046502
1	190076001	190077000	4.16563	0.522341	-4.64452	0.509594	13.4444	0.00905196	Gene Body	ENSSSCG00000051207
1	190232001	190233000	-3.50076	0.301111	4.81609	0.441694	-13.207	0.0299894	Gene Body	ENSSSCG00000005095
1	190624001	190625000	-5.02135	0.113057	-11.8929	0.00057782	3.60275	0.642653	Promoter	ENSSSCG00000005096	HIF1A
1	190635001	190636000	-6.41055	0.00599001	-12.8464	0.00010019	-0.923083	0.731499	Gene Body	ENSSSCG00000005096	HIF1A
1	190677001	190678000	6.13011	0.0195025	0.669044	0.901582	11.0407	4.02e-05	Promoter	ENSSSCG00000005097	SNAPC1
1	190735001	190736000	9.99073	0.00120603	8.79369	0.0714727	11.8761	0.0391724	Intergenic	NA	NA
1	190780001	190781000	-4.20513	0.338328	0.665406	0.919076	-10.2317	0.0387555	Intergenic	NA	NA
1	191140001	191141000	-1.47284	0.693655	-13.2014	0.02044	11.0973	0.153556	Intergenic	NA	NA
1	191867001	191868000	7.61854	0.0105877	11.9554	0.00288676	3.6293	0.707494	Gene Body	ENSSSCG00000005106	NTRK3
1	193659001	193660000	-4.79607	0.238705	-0.59793	0.856234	-10.76	0.0344399	Intergenic	NA	NA
1	194438001	194439000	8.85455	0.0234656	4.27016	0.597694	13.9769	0.00866004	Promoter	ENSSSCG00000005112	WDR89
1	198269001	198270000	2.69264	0.744815	12.4948	0.0336245	-4.97884	0.490414	Intergenic	NA	NA
1	199021001	199022000	-9.73201	0.00018863	-11.0981	0.0028325	-8.62096	0.106606	Gene Body	ENSSSCG00000005130	ELAVL2
1	200311001	200312000	4.04283	0.412295	11.2704	0.0317126	-3.75095	0.546946	Intergenic	NA	NA
1	200312001	200313000	8.35961	0.00539021	3.86614	0.587999	15.9358	0.0002389	Intergenic	NA	NA
1	200414001	200415000	6.28392	0.304484	0.261181	0.773996	13.1752	0.044573	Promoter	ENSSSCG00000005131	DMRTA1
1	200842001	200843000	7.34656	0.0646453	14.3325	0.00572337	-0.954269	0.845441	Intergenic	NA	NA
1	201326001	201327000	8.49569	0.0225201	4.93376	0.630849	12.8957	0.00622455	Gene Body	ENSSSCG00000043817
1	201327001	201328000	12.5298	0.00052035	14.7642	0.00974727	9.80206	0.105279	Gene Body	ENSSSCG00000043817
1	201422001	201423000	4.95584	0.221342	-1.2415	0.761285	11.7662	0.00306376	Gene Body	ENSSSCG00000043817
1	201496001	201497000	-12.2251	1.45e-06	-19.4716	6.52e-07	-4.7663	0.396548	Gene Body	ENSSSCG00000043817
1	202259001	202260000	11.189	1.59e-06	3.10576	0.641066	19.9735	1.38e-10	Promoter	ENSSSCG00000028406	FOCAD
1	203094001	203095000	-4.19607	0.492305	3.7464	0.611335	-13.3642	0.0176465	Gene Body	ENSSSCG00000005167	SLC24A2
1	203376001	203377000	6.99852	0.175634	0.432362	0.881421	14.1626	0.035984	Intergenic	NA	NA
1	203420001	203421000	-7.91088	0.100961	-11.1925	0.0275095	-5.23542	0.476279	Intergenic	NA	NA
1	203683001	203684000	4.40761	0.269897	-3.09891	0.473365	13.3249	4.63e-05	Promoter	ENSSSCG00000035863	PLIN2
1	203721001	203722000	4.82284	0.436876	-3.94723	0.722228	13.8054	0.0366435	Promoter	ENSSSCG00000005173	HAUS6
1	203758001	203759000	-7.50531	0.0529015	-12.4204	0.0163019	-1.40394	0.756316	Promoter	ENSSSCG00000020562	SCARNA8
1	204192001	204193000	-6.35696	0.12548	-4.13334	0.861281	-10.8986	0.034019	Gene Body	ENSSSCG00000040366	ADAMTSL1
1	205898001	205899000	2.74296	0.551285	-1.50885	0.792815	11.9742	0.0200507	Intergenic	NA	NA
1	205923001	205924000	-5.00977	0.248989	-15.7739	0.00015213	6.16502	0.332874	Promoter	ENSSSCG00000005180	BNC2
1	205984001	205985000	-6.11111	0.00985028	-1.30185	0.705362	-11.9676	0.00064999	Gene Body	ENSSSCG00000005180	BNC2
1	206026001	206027000	-5.93367	0.0185577	-10.2139	0.0136547	-0.625	0.583698	Gene Body	ENSSSCG00000005180	BNC2
1	206068001	206069000	4.17551	0.674011	-3.57133	0.219619	11.2314	0.029073	Gene Body	ENSSSCG00000005180	BNC2
1	206511001	206512000	-5.02146	0.164341	0.024866	0.921612	-12.1194	0.00350188	Promoter	ENSSSCG00000048914
1	207397001	207398000	-1.78932	0.706133	3.76211	0.395784	-11.7647	0.0002119	Gene Body	ENSSSCG00000005186	TTC39B
1	207439001	207440000	-12.4532	0.00597427	-10.3285	0.151133	-19.4667	0.0433775	Gene Body	ENSSSCG00000005186	TTC39B
1	208706001	208707000	-4.07457	0.164067	0.923584	0.863212	-10.3132	0.020111	Intergenic	NA	NA
1	209074001	209075000	-3.42782	0.476293	3.14248	0.643089	-13.7998	0.00551118	Gene Body	ENSSSCG00000051701
1	209537001	209538000	-3.91484	0.134055	4.80126	0.808151	-11.8943	0.00382818	Intergenic	NA	NA
1	210144001	210145000	-4.74228	0.239132	2.81422	0.824828	-12.8656	0.0169211	Promoter	ENSSSCG00000048974
1	212432001	212433000	7.33416	0.0481914	-1.98298	0.883182	11.9196	0.00091488	Intergenic	NA	NA
1	214230001	214231000	-10.2395	0.0219725	-3.36761	0.833283	-17.7801	0.00095972	Intergenic	NA	NA
1	215001001	215002000	-13.5779	0.0236443	-22.7467	0.00129811	-5.06053	0.734573	Intergenic	NA	NA
1	215066001	215067000	4.88419	0.0856968	11.9674	0.0032782	-2.32343	0.828013	Intergenic	NA	NA
1	216495001	216496000	8.41498	0.0254634	10.8061	0.0495513	5.64136	0.426386	Promoter	ENSSSCG00000005208	RIC1
1	216791001	216792000	-5.46655	0.340235	6.00099	0.727432	-14.6422	0.0446858	Promoter	ENSSSCG00000005211	CD274
1	217236001	217237000	14.8333	0.0003861	20.1581	0.00078669	10.2851	0.26723	Promoter	ENSSSCG00000023595	AK3
1	217300001	217301000	5.44645	0.0493683	-0.51287	0.799871	14.9651	7.84e-05	Promoter	ENSSSCG00000005221	SPATA6L
1	217301001	217302000	8.42272	0.00341487	12.8701	0.00169779	3.92416	0.492881	Promoter	ENSSSCG00000005221	SPATA6L
1	217304001	217305000	4.70915	0.192961	-5.44163	0.612906	10.4587	0.0008393	Promoter	ENSSSCG00000005220	PLPP6
1	219663001	219664000	10.5296	0.0170286	9.0875	0.246595	10.5208	0.0802523	Promoter	ENSSSCG00000005232	SMARCA2
1	219776001	219777000	-9.46973	0.00714249	-12.1378	0.0241567	-6.84434	0.319721	Gene Body	ENSSSCG00000005232	SMARCA2
1	221827001	221828000	-5.068	0.316076	1.98925	0.822421	-11.7742	0.0385404	Gene Body	ENSSSCG00000005243	PGM5
1	222838001	222839000	2.30853	0.459761	12.8218	0.0473517	-16.142	0.156945	Gene Body	ENSSSCG00000005250	APBA1
1	223688001	223689000	1.95767	0.682277	-5.20547	0.698874	20.3002	0.0209092	Intergenic	NA	NA
1	223794001	223795000	7.59555	0.0958799	14.7316	0.00603753	-4.0225	0.715387	Intergenic	NA	NA
1	224715001	224716000	-12.4681	0.0130813	-13.4439	0.079151	-11.7553	0.236408	Gene Body	ENSSSCG00000047530
1	225340001	225341000	-4.27761	0.365364	3.54434	0.745446	-11.0192	0.0313708	Gene Body	ENSSSCG00000031105	C9orf85
1	227224001	227225000	-6.90111	0.00418668	-3.03587	0.553786	-10.9496	0.00179329	Intergenic	NA	NA
1	227661001	227662000	0.0739087	0.829693	-7.53731	0.253967	11.1888	0.0140184	Gene Body	ENSSSCG00000005268	RORB
1	228199001	228200000	5.08749	0.500138	-1.96299	0.525601	11.2137	0.037	Intergenic	NA	NA
1	228537001	228538000	-2.81507	0.563184	3.95527	0.584223	-10.49	0.0498	Intergenic	NA	NA
1	229058001	229059000	-8.73554	0.035696	-12.542	0.0179202	-4.54317	0.643429	Gene Body	ENSSSCG00000023520	PCSK5
1	229428001	229429000	-5.81792	0.0653403	-14.9754	0.00021358	2.6427	0.733948	Promoter	ENSSSCG00000005277	GCNT1
1	233984001	233985000	-5.05423	0.0663295	-1.00392	0.744316	-12.4706	0.0166265	Promoter	ENSSSCG00000046602
1	234330001	234331000	-3.149	0.218495	1.83108	0.667465	-10.2405	0.00367517	Gene Body	ENSSSCG00000005291	TLE1
1	235593001	235594000	6.55702	0.015748	2.37049	0.790647	11.2829	0.00060219	Intergenic	NA	NA
1	235835001	235836000	11.6773	0.00136803	10.5161	0.103002	13.4096	0.0262604	Gene Body	ENSSSCG00000005300	VCP
1	235877001	235878000	3.58621	0.475374	20.3884	0.00010004	-16.7073	0.0160536	Promoter	ENSSSCG00000005300	VCP
1	235888001	235889000	8.38239	0.0401377	1.72091	0.874697	12.9154	0.00309073	Promoter	ENSSSCG00000005303	PIGO
1	236265001	236266000	3.62807	0.646299	-5.3543	0.475985	18.8108	0.020659	Promoter	ENSSSCG00000005308	RUSC2
1	236299001	236300000	4.0602	0.492586	14.6043	0.00892909	-10.87	0.203577	Gene Body	ENSSSCG00000005308	RUSC2
1	236345001	236346000	0.288341	0.655742	-6.13912	0.557865	11.2027	0.0256425	Gene Body	ENSSSCG00000005310	TESK1
1	236351001	236352000	12.0847	0.020063	7.46901	0.427898	14.2744	0.0444745	Promoter	ENSSSCG00000005311
1	236398001	236399000	-7.27741	0.0135784	-4.96534	0.412525	-10.2357	0.0238827	Gene Body	ENSSSCG00000051368	CA9
1	236399001	236400000	-6.84614	0.101217	-2.09018	0.842377	-12.7367	0.0141137	Gene Body	ENSSSCG00000051368	CA9
1	236411001	236412000	8.86088	0.10168	14.222	0.0176196	4.93757	0.848513	Promoter	ENSSSCG00000005316	TPM2
1	236446001	236447000	-4.7247	0.113305	0.156775	0.902283	-11.2481	0.00826494	Gene Body	ENSSSCG00000005317	TLN1
1	236477001	236478000	10.0215	0.00015544	6.43995	0.283227	14.24	0.00011649	Gene Body	ENSSSCG00000005320	RGP1
1	236508001	236509000	7.9697	0.00123224	-0.0759463	0.137671	17.1163	0.0163272	Promoter	ENSSSCG00000005322	NPR2
1	236669001	236670000	-6.02817	0.20361	-13.7426	0.0306305	0.0102402	0.87438	Gene Body	ENSSSCG00000005325
1	236675001	236676000	9.34046	0.00042635	3.33705	0.110486	16.8791	0.00749201	Gene Body	ENSSSCG00000005325
1	236683001	236684000	7.94326	0.132844	-0.0076266	0.822356	22.2564	0.00403903	Gene Body	ENSSSCG00000005325
1	236924001	236925000	-8.10896	0.0722165	-13.4236	0.00939751	-3.06181	0.824166	Promoter	ENSSSCG00000031236	GLIPR2
1	236937001	236938000	-6.5937	0.041187	-1.6935	0.783505	-11.6236	0.00340707	Gene Body	ENSSSCG00000031236	GLIPR2
1	236946001	236947000	-9.46872	0.0165222	-22.9616	4.24e-08	4.52611	0.552045	Promoter	ENSSSCG00000005340	CCIN
1	237060001	237061000	-8.89845	0.022918	-5.44639	0.475933	-12.3318	0.0247792	Gene Body	ENSSSCG00000037468	GNE
1	237239001	237240000	1.53026	0.520734	-4.94705	0.450056	12.3567	0.00566399	Promoter	ENSSSCG00000005343	RNF38
1	237569001	237570000	-7.26513	0.0571631	-3.7432	0.592856	-10.7162	0.0376492	Intergenic	NA	NA
1	237689001	237690000	-7.52728	0.00130779	-19.8666	2.95e-09	2.34804	0.565405	Gene Body	ENSSSCG00000036086	PAX5
1	237754001	237755000	-2.80624	0.0826126	-14.4223	0.00036963	2.77778	0.751012	Gene Body	ENSSSCG00000036086	PAX5
1	237784001	237785000	-4.6839	0.170151	0.359578	0.840538	-10.6859	0.0393287	Promoter	ENSSSCG00000036086	PAX5
1	237930001	237931000	7.75079	0.0261597	5.42785	0.439917	10.494	0.0341971	Gene Body	ENSSSCG00000005346	ZCCHC7
1	238100001	238101000	11.8754	0.0310034	18.5513	0.00742708	1.15562	0.899632	Intergenic	NA	NA
1	238126001	238127000	-9.35671	0.00985028	-3.47491	0.723362	-16.5699	9.97e-06	Intergenic	NA	NA
1	238140001	238141000	21.91	3.89e-09	18.2908	0.0064726	26.0838	7.54e-07	Promoter	ENSSSCG00000005349	GRHPR
1	238402001	238403000	9.79431	0.0739742	3.79966	0.86249	21.0948	0.00190012	Gene Body	ENSSSCG00000005352	FRMPD1
1	238516001	238517000	4.88078	0.0394235	-1.94385	0.870077	12.1819	0.00152978	Promoter	ENSSSCG00000005354	TRMT10B
1	238683001	238684000	-3.17312	0.215982	1.23689	0.921277	-11.2883	0.028868	Gene Body	ENSSSCG00000005358
1	238779001	238780000	-7.53978	0.00310102	-4.80219	0.303876	-10.8573	0.0084614	Gene Body	ENSSSCG00000005358
1	238792001	238793000	-9.79808	0.00538769	-7.47308	0.233889	-12.6932	0.0266429	Gene Body	ENSSSCG00000005358
1	238804001	238805000	-1.40496	0.736714	-11.1644	0.0380623	8.99428	0.16708	Gene Body	ENSSSCG00000005358
1	239109001	239110000	4.30047	0.503036	-3.89521	0.441578	13.1578	0.00670554	Promoter	ENSSSCG00000005361	ALDH1B1
1	239136001	239137000	10.7354	5.58e-05	4.84439	0.899621	16.7556	8.05e-09	Promoter	ENSSSCG00000005360	IGFBPL1
1	239286001	239287000	10.7957	1.59e-05	9.03525	0.0258262	12.9674	0.00281843	Gene Body	ENSSSCG00000045508	CCDC180
1	239336001	239337000	-3.41821	0.489508	-10.2146	0.0333527	3.56075	0.521369	Gene Body	ENSSSCG00000045508	CCDC180
1	239345001	239346000	0.798609	0.88947	11.6886	0.059866	-11.6064	0.017288	Gene Body	ENSSSCG00000045508	CCDC180
1	239403001	239404000	-6.44998	0.134988	-11.4189	0.0250806	0.226451	0.904902	Gene Body	ENSSSCG00000005366	NCBP1
1	239621001	239622000	6.12036	0.165553	0.176931	0.909079	11.3412	0.0216797	Intergenic	NA	NA
1	239901001	239902000	-0.156419	0.81835	9.95926	0.28865	-18.6524	0.0451669	Gene Body	ENSSSCG00000005373	NANS
1	239919001	239920000	6.43933	0.00022653	4.94599	0.150726	10.6812	0.00163724	Gene Body	ENSSSCG00000005373	NANS
1	240042001	240043000	-15.6597	0.00074564	-12.8679	0.117862	-15.6202	0.0131287	Gene Body	ENSSSCG00000005376	TBC1D2
1	240340001	240341000	-3.36904	0.565799	-12.2061	0.012279	2.55624	0.504571	Gene Body	ENSSSCG00000027558	GABBR2
1	240960001	240961000	4.1546	0.331839	14.5786	0.00138002	-8.45362	0.142521	Intergenic	NA	NA
1	241056001	241057000	5.29988	0.46564	-1.10817	0.692291	14.3506	0.0351847	Gene Body	ENSSSCG00000041432
1	241414001	241415000	8.22382	0.0287903	11.4838	0.0124206	4.53869	0.704249	Gene Body	ENSSSCG00000041432
1	241658001	241659000	0.281004	0.817059	-12.6772	0.0157214	18.7583	0.00065946	Promoter	ENSSSCG00000005386	STX17
1	242119001	242120000	11.5198	0.00314723	4.79323	0.590794	18.9576	0.00036658	Promoter	ENSSSCG00000005389	TEX10
1	242214001	242215000	7.34252	0.0617925	12.133	0.014863	2.00208	0.793076	Promoter	ENSSSCG00000005391	MSANTD3-TMEFF1
1	243486001	243487000	-5.11507	0.0341763	1.27697	0.919834	-10.0474	0.00086042	Gene Body	ENSSSCG00000044263
1	244231001	244232000	-7.88895	0.0309432	-12.3219	0.0100264	-2.46653	0.71627	Intergenic	NA	NA
1	244930001	244931000	-5.47222	0.340046	-13.3812	0.0287075	2.59748	0.701506	Intergenic	NA	NA
1	246104001	246105000	-2.48101	0.596866	-11.3317	0.00042305	9.04201	0.0264446	Promoter	ENSSSCG00000005424	NIPSNAP3A
1	246255001	246256000	-3.81356	0.34971	3.62825	0.865817	-11.1267	0.0391608	Gene Body	ENSSSCG00000005423	ABCA1
1	246547001	246548000	-8.88545	0.0023554	-7.87967	0.0971988	-10.3972	0.0485607	Promoter	ENSSSCG00000005425	SLC44A1
1	248092001	248093000	-3.63001	0.346907	2.14832	0.712916	-11.3686	0.00990621	Gene Body	ENSSSCG00000031592	ZNF462
1	248155001	248156000	-5.2349	0.31783	1.25137	0.75716	-12.6411	0.0108801	Gene Body	ENSSSCG00000031592	ZNF462
1	248590001	248591000	-5.449	0.223846	-11.3831	0.0446972	0.682475	0.873095	Intergenic	NA	NA
1	248786001	248787000	0.857972	0.796821	-7.01673	0.235067	10.0793	0.0329315	Intergenic	NA	NA
1	248914001	248915000	-3.41835	0.578201	4.51316	0.440671	-10.2533	0.0478088	Gene Body	ENSSSCG00000043016
1	249906001	249907000	4.69909	0.349073	10.2996	0.0287234	-3.21526	0.644501	Promoter	ENSSSCG00000005440
1	250077001	250078000	0.0641493	0.679808	-11.0449	0.00652376	10.867	0.0598099	Promoter	ENSSSCG00000005444	TMEM245
1	250131001	250132000	-6.09125	0.311323	2.42655	0.555732	-20.7716	0.00117261	Gene Body	ENSSSCG00000005444	TMEM245
1	250512001	250513000	-6.36461	0.0356633	-1.54212	0.85049	-11.6279	0.00246218	Gene Body	ENSSSCG00000005449	PTPN3
1	250590001	250591000	-7.64417	0.00323961	-11.818	0.00211354	-2.30718	0.577445	Intergenic	NA	NA
1	250718001	250719000	-13.5213	2.47e-05	-13.5853	0.00428773	-12.7378	0.0239923	Gene Body	ENSSSCG00000033120	PALM2AKAP2
1	250792001	250793000	10.9692	0.00272211	2.81195	0.440535	17.352	0.00403829	Gene Body	ENSSSCG00000033120	PALM2AKAP2
1	250981001	250982000	-10.5255	0.00565314	-12.8881	0.0185995	-6.19076	0.323325	Gene Body	ENSSSCG00000033120	PALM2AKAP2
1	250987001	250988000	-0.304569	0.786735	-10.3605	0.0670703	11.7442	0.00195131	Gene Body	ENSSSCG00000033120	PALM2AKAP2
1	250995001	250996000	-10.4278	0.00856266	-11.1747	0.134214	-9.91787	0.10111	Gene Body	ENSSSCG00000033120	PALM2AKAP2
1	251122001	251123000	-8.87314	0.0511157	-4.52765	0.637459	-12.4395	0.0282665	Gene Body	ENSSSCG00000033120	PALM2AKAP2
1	251196001	251197000	4.63746	0.233653	0.654071	0.889422	11.1096	0.0326919	Intergenic	NA	NA
1	251218001	251219000	-0.2526	0.61258	10.2701	0.23412	-15.0327	0.00310609	Promoter	ENSSSCG00000005452	C9orf152
1	251276001	251277000	6.79398	8.95e-05	10.5995	1.01e-05	5.34114	0.385705	Promoter	ENSSSCG00000005453
1	251763001	251764000	-8.38712	0.0110886	-3.55335	0.426254	-12.5671	0.00580135	Intergenic	NA	NA
1	251909001	251910000	-5.11241	0.127107	-12.1121	0.00067326	1.95735	0.688974	Gene Body	ENSSSCG00000005457	LPAR1
1	252405001	252406000	-5.57802	0.20886	-10.972	0.0269327	2.20924	0.804598	Intergenic	NA	NA
1	252581001	252582000	-10.1056	0.0032391	-6.47485	0.247809	-15.5741	0.00974254	Intergenic	NA	NA
1	252651001	252652000	5.75973	0.0414251	-0.0695451	0.84443	13.0144	1.85e-05	Promoter	ENSSSCG00000022780	UGCG
1	252666001	252667000	-19.836	0.00064343	-15.5621	0.0564849	-30.6911	0.0178637	Gene Body	ENSSSCG00000022780	UGCG
1	252891001	252892000	-8.24795	0.00987228	-11.943	0.0118476	-1.98855	0.377702	Gene Body	ENSSSCG00000005465	SUSD1
1	252907001	252908000	-8.728	0.0147486	-11.44	0.0383672	-7.03186	0.384097	Gene Body	ENSSSCG00000005465	SUSD1
1	252921001	252922000	-9.34534	0.0131278	-10.1068	0.0126433	-6.97707	0.573376	Gene Body	ENSSSCG00000005465	SUSD1
1	252949001	252950000	-6.73092	0.033559	-0.974955	0.829944	-13.9013	0.00108664	Gene Body	ENSSSCG00000005465	SUSD1
1	252955001	252956000	-9.50785	0.00271761	-1.52282	0.896061	-19.4245	9.7e-07	Promoter	ENSSSCG00000005465	SUSD1
1	253203001	253204000	5.60235	0.0100259	-0.589784	0.698907	11.8309	0.0006491	Promoter	ENSSSCG00000005469	KIAA1958
1	253285001	253286000	2.44669	0.812272	-12.9642	0.0601425	22.2794	0.0468245	Gene Body	ENSSSCG00000005469	KIAA1958
1	253429001	253430000	-6.03552	0.117504	-11.8705	0.0334213	1.11989	0.905184	Promoter	ENSSSCG00000005471	SNX30
1	253490001	253491000	-5.9274	0.0736741	3.02026	0.737268	-19.2497	3.26e-05	Gene Body	ENSSSCG00000005471	SNX30
1	253569001	253570000	6.42502	0.201747	1.42854	0.9185	10.3538	0.038579	Promoter	ENSSSCG00000005472	SLC46A2
1	253593001	253594000	-6.00136	0.234664	-14.5844	0.00209043	5.26282	0.43731	Intergenic	NA	NA
1	253653001	253654000	2.72353	0.122143	-2.3216	0.891033	15.1524	0.0006577	Promoter	ENSSSCG00000044417
1	253813001	253814000	4.61268	0.503956	14.263	0.0197122	-6.20043	0.409411	Gene Body	ENSSSCG00000005477	FKBP15
1	253849001	253850000	-8.1881	0.0524677	-4.53127	0.583416	-12.6655	0.0254571	Gene Body	ENSSSCG00000005477	FKBP15
1	253966001	253967000	9.09256	0.00042326	2.45737	0.69238	16.9186	1.26e-06	Promoter	ENSSSCG00000027688	RNF183
1	254008001	254009000	-10.3773	0.00149034	-21.3932	7.34e-07	-1.72163	0.775809	Promoter	ENSSSCG00000039861	HDHD3
1	254035001	254036000	10.4269	6.72e-05	7.4394	0.181856	12.2955	0.00015238	Promoter	ENSSSCG00000005478
1	254057001	254058000	5.72903	0.158133	11.0234	0.00749884	-1.10042	0.841852	Gene Body	ENSSSCG00000005479	C9orf43
1	254084001	254085000	-4.70466	0.304692	1.21651	0.874341	-10.3797	0.048476	Gene Body	ENSSSCG00000005480	RGS3
1	254114001	254115000	-4.05664	0.161501	-11.4222	0.00568575	4.64644	0.644532	Promoter	ENSSSCG00000005480	RGS3
1	254233001	254234000	-11.2832	0.0391364	-12.7236	0.043565	-11.1678	0.613532	Intergenic	NA	NA
1	254299001	254300000	0.041175	0.870303	10.0375	0.156745	-12.9074	0.0415534	Intergenic	NA	NA
1	254677001	254678000	6.37431	0.0364896	10.6255	0.021178	3.12281	0.658564	Intergenic	NA	NA
1	254723001	254724000	8.01258	0.00956174	5.0044	0.296383	14.1074	0.0283214	Intergenic	NA	NA
1	254753001	254754000	-5.68856	0.00049158	-2.5303	0.438421	-10.6287	9.49e-05	Intergenic	NA	NA
1	254824001	254825000	-4.25226	0.0767204	0.825134	0.848292	-10.5019	0.0109131	Promoter	ENSSSCG00000018765	MIR455
1	254834001	254835000	2.8407	0.440671	-4.84523	0.667465	11.2434	0.0291952	Gene Body	ENSSSCG00000005487	COL27A1
1	255090001	255091000	-5.29399	0.149276	-0.529993	0.918985	-11.1468	0.0145227	Gene Body	ENSSSCG00000005490	WHRN
1	255168001	255169000	6.85633	3.56e-06	10.0395	0.00066933	2.63929	0.0287412	Promoter	ENSSSCG00000032835	ATP6V1G1
1	255215001	255216000	7.18391	0.0944815	11.3097	0.00345628	-1.13374	0.769368	Intergenic	NA	NA
1	255392001	255393000	-7.9552	0.00992716	-2.97492	0.842074	-15.6059	0.00030849	Intergenic	NA	NA
1	255445001	255446000	-8.13256	0.156103	2.35334	0.821439	-20.962	0.00087106	Gene Body	ENSSSCG00000036457	TNFSF8
1	255682001	255683000	19.5222	0.00012053	21.7763	0.00605821	18.1601	0.0505703	Intergenic	NA	NA
1	255718001	255719000	-5.35072	0.311591	-12.7084	0.0322194	2.61144	0.748966	Intergenic	NA	NA
1	255748001	255749000	3.80961	0.470953	13.6856	0.0316376	-8.62304	0.427687	Gene Body	ENSSSCG00000046112
1	255768001	255769000	-7.41247	0.0139941	-12.3644	0.0149818	-2.84129	0.477604	Intergenic	NA	NA
1	256252001	256253000	-8.69296	0.0856729	-3.3338	0.586564	-20.4365	0.0407889	Intergenic	NA	NA
1	256674001	256675000	-7.56479	0.0357717	-4.1618	0.462609	-11.4334	0.0437885	Gene Body	ENSSSCG00000005498	PAPPA
1	256812001	256813000	6.53209	0.097728	3.96016	0.648712	10.5364	0.0481358	Intergenic	NA	NA
1	257178001	257179000	8.52505	0.031968	3.39076	0.657424	13.1685	0.0109695	Gene Body	ENSSSCG00000005502	ASTN2
1	257225001	257226000	-6.18577	0.0948279	-12.9085	0.0491753	-3.7286	0.678661	Gene Body	ENSSSCG00000005502	ASTN2
1	257425001	257426000	-7.20086	0.00333697	-12.1594	0.0151781	-4.83408	0.247568	Gene Body	ENSSSCG00000005502	ASTN2
1	258208001	258209000	-3.95535	0.441281	3.30293	0.701613	-13.7202	0.0418699	Intergenic	NA	NA
1	258915001	258916000	-6.78205	0.32991	-1.0989	0.910207	-22.7625	0.017122	Gene Body	ENSSSCG00000043986
1	259167001	259168000	3.09689	0.502913	-4.61951	0.550248	14.2346	0.0021875	Intergenic	NA	NA
1	259218001	259219000	-3.23115	0.0304103	16.7415	0.921935	-11.9473	0.0277608	Gene Body	ENSSSCG00000048699
1	259377001	259378000	8.04851	0.0920315	0.298466	0.879786	14.9346	0.0104909	Gene Body	ENSSSCG00000005504	BRINP1
1	260018001	260019000	6.50041	0.225659	15.3801	0.0426484	-0.332908	0.892187	Gene Body	ENSSSCG00000041789
1	260647001	260648000	3.67298	0.268175	-2.03573	0.572666	11.0996	0.00126377	Intergenic	NA	NA
1	260949001	260950000	4.19779	0.352611	-2.39376	0.854436	13.5807	0.0408401	Gene Body	ENSSSCG00000005511	TRAF1
1	260955001	260956000	-12.7092	0.0290617	-19.6762	0.00024853	1.76353	0.545991	Gene Body	ENSSSCG00000005511	TRAF1
1	261328001	261329000	3.56896	0.246889	11.4451	0.00251924	-0.856197	0.720872	Promoter	ENSSSCG00000037508	GSN
1	261344001	261345000	-8.66669	0.448723	2.01928	0.271529	-21.554	0.00183109	Promoter	ENSSSCG00000037508	GSN
1	261428001	261429000	-7.9708	0.0202596	-3.06442	0.706833	-13.5715	0.00266762	Intergenic	NA	NA
1	261554001	261555000	-12.6428	0.00191818	-18.6735	0.0001144	-5.4255	0.670733	Gene Body	ENSSSCG00000005518
1	261607001	261608000	-8.6803	0.0127175	-6.8589	0.329618	-10.6104	0.0350406	Intergenic	NA	NA
1	261813001	261814000	6.52045	0.054357	13.0719	0.0279471	0.447145	0.685752	Promoter	ENSSSCG00000005524	DAB2IP
1	262103001	262104000	7.81306	0.128834	-0.406862	0.770174	15.1451	0.00019157	Gene Body	ENSSSCG00000038036	TTLL11
1	262258001	262259000	7.88175	0.00583489	11.7145	0.00152729	3.09121	0.542746	Promoter	ENSSSCG00000005528	NDUFA8
1	262267001	262268000	-8.29736	0.0179414	-5.1841	0.407595	-15.5248	0.0242286	Gene Body	ENSSSCG00000005529
1	262281001	262282000	4.862	0.127243	1.94974	0.729777	15.5814	0.0399374	Gene Body	ENSSSCG00000005529
1	262318001	262319000	-3.98849	0.32761	8.57008	0.607312	-17.8141	0.0383983	Gene Body	ENSSSCG00000005530	LHX6
1	262373001	262374000	5.45989	0.0267359	12.3592	0.0275188	3.03834	0.533783	Gene Body	ENSSSCG00000005532	MRRF
1	264251001	264252000	-6.32097	0.147159	-13.7071	0.00971962	0.804795	0.859871	Gene Body	ENSSSCG00000048111
1	264281001	264282000	1.92986	0.603015	-4.50304	0.240575	15.6758	0.0045593	Gene Body	ENSSSCG00000005584	CRB2
1	264535001	264536000	7.40144	0.00558477	12.1626	0.00241374	1.82602	0.589294	Gene Body	ENSSSCG00000005585	DENND1A
1	264605001	264606000	-7.54907	0.094667	-2.19385	0.808307	-14.7999	0.0168363	Gene Body	ENSSSCG00000005585	DENND1A
1	264885001	264886000	8.38351	5.27e-05	4.79241	0.308309	23.9943	2.72e-05	Intergenic	NA	NA
1	264980001	264981000	-4.76834	0.302057	1.09546	0.77121	-13.2862	0.0215867	Intergenic	NA	NA
1	265040001	265041000	-7.96871	0.00175441	-12.4138	0.00046625	-3.53364	0.476856	Intergenic	NA	NA
1	265043001	265044000	-7.14828	0.0089563	-2.10265	0.770268	-11.2475	0.00017135	Intergenic	NA	NA
1	265046001	265047000	-0.551466	0.0397712	11.7822	0.0004262	-2.80641	0.655205	Intergenic	NA	NA
1	265074001	265075000	-10.4225	0.00027947	-11.743	0.0147028	-8.99454	0.057964	Intergenic	NA	NA
1	265075001	265076000	-0.596214	0.691417	-10.8384	0.00041485	9.25243	0.025271	Promoter	ENSSSCG00000005587	NEK6
1	265187001	265188000	-11.8708	0.00023673	-11.295	0.0811913	-12.0433	0.00803274	Gene Body	ENSSSCG00000005590	PSMB7
1	265191001	265192000	-2.00166	0.417655	5.32297	0.43325	-12.8091	0.00033668	Gene Body	ENSSSCG00000005590	PSMB7
1	265262001	265263000	9.07009	1.43e-05	8.26578	0.0129956	13.363	0.0054387	Promoter	ENSSSCG00000005591	ADGRD2
1	265610001	265611000	-3.45265	0.515914	7.45696	0.376567	-14.5059	0.00916535	Promoter	ENSSSCG00000018128	U6
1	265795001	265796000	9.17635	0.0153048	6.00198	0.521433	12.0981	0.0115285	Gene Body	ENSSSCG00000005598	SCAI
1	265894001	265895000	9.54565	0.0461573	4.38457	0.617276	16.5582	0.0161635	Gene Body	ENSSSCG00000005600	PPP6C
1	265904001	265905000	-6.97565	0.635135	2.62774	0.143537	-15.9175	0.017713	Promoter	ENSSSCG00000005599	RABEPK
1	266070001	266071000	-3.98361	0.088768	2.76911	0.82735	-16.78	0.00607567	Intergenic	NA	NA
1	266074001	266075000	4.85036	0.429257	-11.6692	0.676959	17.727	0.0462744	Intergenic	NA	NA
1	266167001	266168000	8.22833	0.0587985	12.5166	0.0440026	4.22307	0.66256	Gene Body	ENSSSCG00000029169	MAPKAP1
1	266346001	266347000	5.86124	0.356891	-3.6603	0.0799772	15.2133	9.48e-08	Promoter	ENSSSCG00000029169	MAPKAP1
1	266418001	266419000	-8.86387	0.10414	-14.3193	0.00518914	-0.391294	0.783437	Gene Body	ENSSSCG00000005604	PBX3
1	266512001	266513000	5.3911	0.0536159	10.1874	0.00216917	-0.18635	0.853051	Gene Body	ENSSSCG00000005604	PBX3
1	266521001	266522000	-6.90497	0.0386537	-1.26551	0.908386	-11.6356	0.00266786	Gene Body	ENSSSCG00000005604	PBX3
1	266546001	266547000	-6.88834	0.0975167	-11.2353	0.0335252	-1.71741	0.808767	Gene Body	ENSSSCG00000005604	PBX3
1	266673001	266674000	-7.96082	0.0815881	-3.77967	0.616465	-10.4789	0.040254	Intergenic	NA	NA
1	266690001	266691000	-10.0513	0.0379814	-11.1379	0.302874	-10.9034	0.140981	Gene Body	ENSSSCG00000048498
1	267212001	267213000	-2.26064	0.421194	6.67354	0.542019	-11.5531	0.0126538	Gene Body	ENSSSCG00000035968	LMX1B
1	267245001	267246000	-3.13924	0.57626	7.15694	0.544549	-14.4595	0.0246972	Gene Body	ENSSSCG00000035968	LMX1B
1	267363001	267364000	-2.98837	0.501089	5.05563	0.456806	-10.9704	0.00997185	Intergenic	NA	NA
1	267428001	267429000	-6.94455	0.0767968	-3.50548	0.689403	-12.3116	0.0425381	Intergenic	NA	NA
1	267447001	267448000	-11.2915	1.12e-05	-14.7312	5.04e-05	-8.27911	0.0679726	Gene Body	ENSSSCG00000031426	ZBTB34
1	267481001	267482000	-5.38158	0.303637	-10.2013	0.0073521	3.02028	0.696207	Promoter	ENSSSCG00000005607	RALGPS1
1	267604001	267605000	8.47309	0.00284392	6.60874	0.10799	11.9867	0.0477877	Gene Body	ENSSSCG00000005607	RALGPS1
1	267657001	267658000	-8.28549	0.00144721	-1.80903	0.908214	-18.5136	5.7e-06	Gene Body	ENSSSCG00000005607	RALGPS1
1	267792001	267793000	9.35346	0.00748744	5.70526	0.364314	15.9821	0.0109038	Gene Body	ENSSSCG00000005609	GARNL3
1	267974001	267975000	-9.09817	0.00289968	-10.3654	0.0337501	-8.87003	0.15965	Gene Body	ENSSSCG00000005613	LRSAM1
1	268065001	268066000	3.60484	0.171497	11.7431	0.00425866	-2.57323	0.793979	Promoter	ENSSSCG00000005614	NIBAN2
1	268223001	268224000	7.35151	0.0132689	4.54907	0.474366	10.1318	0.0124381	Gene Body	ENSSSCG00000005616	TTC16
1	268303001	268304000	5.91654	0.0439903	15.6569	0.00411487	2.36761	0.815839	Gene Body	ENSSSCG00000005626	FPGS
1	268342001	268343000	7.07472	0.418975	16.0573	0.00236324	-8.19412	0.252326	Promoter	ENSSSCG00000005625	ENG
1	268343001	268344000	14.4088	9.89e-07	8.08199	0.0245544	21.6855	0.00011881	Promoter	ENSSSCG00000005625	ENG
1	268347001	268348000	-3.80121	0.0959352	-12.881	0.00869179	6.05557	0.854992	Intergenic	NA	NA
1	268353001	268354000	-3.89342	0.06902	-0.60926	0.851818	-12.4094	0.00914409	Promoter	ENSSSCG00000047019
1	268390001	268391000	5.15251	0.345977	-6.84807	0.437962	17.9295	0.00081736	Intergenic	NA	NA
1	268431001	268432000	7.55349	0.0229129	-8.46277	0.397269	22.3127	6.39e-08	Gene Body	ENSSSCG00000022295
1	268452001	268453000	-6.66403	0.180524	-17.1166	0.0002684	1.22367	0.27095	Gene Body	ENSSSCG00000022295
1	268455001	268456000	-2.38815	0.868026	-13.1844	0.0562117	16.1757	0.00330463	Gene Body	ENSSSCG00000022295
1	268457001	268458000	-11.2196	0.100512	-15.0744	0.0197842	-2.82542	0.896079	Gene Body	ENSSSCG00000022295
1	268460001	268461000	-12.7512	0.00221727	-10.0559	0.083627	-15.1915	0.055657	Gene Body	ENSSSCG00000022295
1	268503001	268504000	12.342	2.11e-05	10.4057	0.00549486	13.5278	0.017498	Gene Body	ENSSSCG00000022295
1	268507001	268508000	6.60861	0.0784018	2.14148	0.918203	12.7249	0.00071154	Gene Body	ENSSSCG00000022295
1	268514001	268515000	-13.2129	0.0212074	-15.4659	0.299126	-11.1426	0.0822237	Gene Body	ENSSSCG00000022295
1	268530001	268531000	-3.97843	0.187492	3.37126	0.661662	-13.1262	0.00061524	Promoter	ENSSSCG00000005630
1	268692001	268693000	-6.96212	0.19974	-13.0364	0.0445713	1.08239	0.869102	Promoter	ENSSSCG00000019744	MIR199B
1	268696001	268697000	-7.44149	0.00237531	-5.90807	0.169344	-11.6539	0.0191445	Gene Body	ENSSSCG00000005641	DNM1
1	268719001	268720000	9.84705	6.65e-07	16.0041	8.55e-08	3.29071	0.251315	Promoter	ENSSSCG00000005643
1	268721001	268722000	-6.41929	0.0531355	-13.3345	0.00152603	0.873151	0.902291	Promoter	ENSSSCG00000005643
1	268741001	268742000	-13.1122	1.33e-06	-8.36874	0.120106	-20.0399	1.87e-05	Intergenic	NA	NA
1	268757001	268758000	9.03825	0.0367228	0.874304	0.836016	16.2109	0.00015302	Promoter	ENSSSCG00000005645	TRUB2
1	268791001	268792000	-8.67186	0.0327627	-15.6315	0.00296266	-2.09158	0.767683	Intergenic	NA	NA
1	268817001	268818000	0.54406	0.432303	-10.73	0.0175941	5.92298	0.603378	Promoter	ENSSSCG00000027037	MIR219B
1	268886001	268887000	-7.41438	0.0255905	-2.19096	0.669439	-12.5204	0.00917681	Gene Body	ENSSSCG00000005651	ODF2
1	268935001	268936000	3.30073	0.0906504	-1.93371	0.855583	12.0729	0.0121303	Promoter	ENSSSCG00000005654	SPTAN1
1	268954001	268955000	11.9897	3.45e-08	14.881	0.00020491	8.13562	0.00117506	Promoter	ENSSSCG00000005654	SPTAN1
1	269050001	269051000	-7.07135	0.00760299	-2.39436	0.792065	-14.6418	1.34e-05	Promoter	ENSSSCG00000005656
1	269085001	269086000	7.24001	0.433069	15.6341	0.0195805	0.70207	0.582684	Promoter	ENSSSCG00000005659	ZER1
1	269116001	269117000	-2.05329	0.849286	-14.2841	0.0096995	13.8407	0.00673955	Promoter	ENSSSCG00000005659	ZER1
1	269166001	269167000	-5.9155	0.00711559	-14.2404	0.00817259	-6.23702	0.533325	Promoter	ENSSSCG00000005662	SPOUT1
1	269216001	269217000	-1.12861	0.278288	11.0773	0.365779	-15.7612	0.00020138	Gene Body	ENSSSCG00000005664	LRRC8A
1	269225001	269226000	-3.71499	0.415628	-12.7382	0.0283112	9.42841	0.513504	Gene Body	ENSSSCG00000005664	LRRC8A
1	269231001	269232000	3.84827	0.690441	12.1981	0.0226988	-9.98641	0.171523	Promoter	ENSSSCG00000005665	PHYHD1
1	269335001	269336000	2.71114	0.410273	10.6287	1.34e-05	-7.16705	0.0271538	Promoter	ENSSSCG00000005669	MIGA2
1	269391001	269392000	7.90392	0.00449835	18.8928	3.54e-06	-2.6309	0.632185	Gene Body	ENSSSCG00000005671	CRAT
1	269423001	269424000	-5.36512	0.629199	-12.4801	0.0117428	10.685	0.110379	Gene Body	ENSSSCG00000005672	PTPA
1	269544001	269545000	-0.802132	0.865735	-14.9159	0.00652386	14.7467	0.00447351	Intergenic	NA	NA
1	269604001	269605000	-1.92901	0.680289	7.86011	0.565465	-21.7581	0.0415185	Gene Body	ENSSSCG00000043118
1	269605001	269606000	9.98221	0.0095881	12.2383	0.0321355	6.06061	0.331907	Gene Body	ENSSSCG00000043118
1	269642001	269643000	-10.285	0.00872287	-3.54791	0.826344	-15.8576	8.9e-05	Gene Body	ENSSSCG00000043118
1	269674001	269675000	-2.43476	0.566312	2.95081	0.532318	-10.236	0.0272195	Gene Body	ENSSSCG00000043118
1	269710001	269711000	-13.2213	0.00067561	-11.8867	0.0318471	-13.3089	0.055365	Gene Body	ENSSSCG00000043118
1	269711001	269712000	5.87502	0.0829043	16.5541	0.0030053	0.228156	0.872191	Gene Body	ENSSSCG00000043118
1	269726001	269727000	-12.4898	0.00585338	-19.5659	0.0466624	-12.9703	0.163054	Gene Body	ENSSSCG00000043118
1	269781001	269782000	-11.4389	0.0335266	-11.071	0.065205	-6.7204	0.479207	Promoter	ENSSSCG00000050745
1	269806001	269807000	-2.70328	0.434962	1.59763	0.736001	-18.3108	0.0300724	Intergenic	NA	NA
1	269816001	269817000	9.44639	0.00158357	13.4071	0.0155903	4.35085	0.152995	Promoter	ENSSSCG00000032122
1	269882001	269883000	10.763	0.042255	15.187	0.0414476	5.71275	0.507725	Gene Body	ENSSSCG00000005680	PRRX2
1	269914001	269915000	-7.82432	0.0830483	-4.77904	0.717118	-11.8371	0.0152023	Gene Body	ENSSSCG00000005688	PTGES
1	269947001	269948000	-11.7228	0.00935206	-16.772	0.0010538	-2.58469	0.711218	Gene Body	ENSSSCG00000046981
1	269996001	269997000	7.17629	0.046156	3.75262	0.570809	11.6004	0.0420614	Promoter	ENSSSCG00000030426	C9orf78
1	270038001	270039000	0.235789	0.89473	-7.79507	0.0702469	10.5941	0.0459579	Gene Body	ENSSSCG00000024341	USP20
1	270041001	270042000	17.8932	2.94e-11	14.8936	0.00645509	21.094	4.57e-09	Gene Body	ENSSSCG00000024341	USP20
1	270085001	270086000	-8.3037	0.0192649	-3.88031	0.7229	-13.4851	0.00156753	Gene Body	ENSSSCG00000024341	USP20
1	270186001	270187000	-8.18511	0.00512326	-3.04025	0.724436	-18.1413	3.29e-05	Intergenic	NA	NA
1	270212001	270213000	7.73044	0.0695878	2.61561	0.655491	13.3557	0.0384966	Gene Body	ENSSSCG00000038868	GPR107
1	270220001	270221000	9.30465	0.0830492	4.97202	0.607674	17.0486	0.0404971	Gene Body	ENSSSCG00000038868	GPR107
1	270228001	270229000	4.05635	0.210718	-2.50869	0.806433	10.2324	0.0118963	Gene Body	ENSSSCG00000038868	GPR107
1	270257001	270258000	-9.90459	0.00036333	-3.1545	0.735042	-17.3069	1.71e-07	Intergenic	NA	NA
1	270258001	270259000	-15.2955	3.17e-08	-12.7389	0.0116221	-18.2763	7.3e-06	Intergenic	NA	NA
1	270275001	270276000	-7.24084	2.62e-05	-15.3629	0.00229685	-8.02343	0.0484989	Promoter	ENSSSCG00000039311	NCS1
1	270406001	270407000	-4.68654	0.302408	-0.41998	0.777896	-10.1858	0.0106045	Gene Body	ENSSSCG00000005699	HMCN2
1	270436001	270437000	-3.76405	0.202001	-0.849025	0.885171	-10.1791	0.0441839	Gene Body	ENSSSCG00000005699	HMCN2
1	270495001	270496000	6.77907	0.541116	-1.52668	0.408702	13.2137	0.0247639	Gene Body	ENSSSCG00000005699	HMCN2
1	270506001	270507000	-11.0984	0.00016059	-11.0305	0.0252012	-10.8992	0.0225266	Gene Body	ENSSSCG00000005699	HMCN2
1	270581001	270582000	-8.27187	0.0226034	-11.2454	0.014008	-4.83849	0.645673	Gene Body	ENSSSCG00000005701	ASS1
1	270618001	270619000	11.4491	0.00342801	21.7151	5.02e-06	0.417266	0.810604	Intergenic	NA	NA
1	270738001	270739000	5.34258	0.249815	15.5035	0.00043782	-4.62888	0.626752	Gene Body	ENSSSCG00000005703	PRDM12
1	270857001	270858000	-3.97499	0.834982	-19.5002	4.91e-07	14.428	2.67e-06	Promoter	ENSSSCG00000005706	ABL1
1	270896001	270897000	5.5505	0.166143	-1.78957	0.839608	13.915	0.00312115	Gene Body	ENSSSCG00000005706	ABL1
1	271212001	271213000	11.4412	7.82e-06	13.7109	8.34e-06	8.52409	0.239296	Promoter	ENSSSCG00000041350
1	271213001	271214000	9.54345	0.0313888	6.23835	0.764044	11.3741	0.00398098	Promoter	ENSSSCG00000041350
1	271215001	271216000	11.5985	0.00055658	9.37098	0.0390458	11.7243	0.0400295	Promoter	ENSSSCG00000041350
1	271228001	271229000	-4.50942	0.205379	-10.0811	0.00608134	0.854504	0.772109	Intergenic	NA	NA
1	271240001	271241000	3.92273	0.485146	-5.53656	0.662436	15.2429	0.0416897	Promoter	ENSSSCG00000005713	PLPP7
1	271254001	271255000	-3.16039	0.228022	-10.9881	0.00629997	4.3383	0.571634	Gene Body	ENSSSCG00000005713	PLPP7
1	271269001	271270000	10.0735	0.0913991	3.04144	0.911698	12.428	0.00918383	Promoter	ENSSSCG00000005713	PLPP7
1	271330001	271331000	-6.6661	0.246093	-10.7828	0.0455361	3.00486	0.645784	Intergenic	NA	NA
1	271347001	271348000	-11.6167	4.48e-06	-14.6561	0.00028015	-11.6779	0.0374463	Gene Body	ENSSSCG00000005715	PRRC2B
1	271443001	271444000	15.2497	6.62e-12	12.5325	0.00101737	21.1523	3.26e-09	Gene Body	ENSSSCG00000005716	POMT1
1	271462001	271463000	5.7969	0.0183246	1.03351	0.893575	17.8981	6.49e-05	Promoter	ENSSSCG00000031465	PRRT1B
1	271582001	271583000	9.47738	0.0379078	5.47241	0.505065	13.6994	0.0392856	Gene Body	ENSSSCG00000005719	RAPGEF1
1	271602001	271603000	0.384269	0.112972	20.2635	0.00024851	-18.5119	0.291793	Promoter	ENSSSCG00000005719	RAPGEF1
1	271612001	271613000	-8.01035	0.00709005	-10.4368	0.0463811	-9.42431	0.210992	Intergenic	NA	NA
1	271644001	271645000	4.26949	0.159737	-13.2684	0.00398613	24.2404	5.31e-12	Intergenic	NA	NA
1	271689001	271690000	-5.77278	0.24936	-13.4319	0.0419532	0.324567	0.87669	Intergenic	NA	NA
1	271745001	271746000	-1.90974	0.307122	-14.6661	2.7e-05	10.5245	0.0731056	Gene Body	ENSSSCG00000005720	MED27
1	271752001	271753000	3.81241	0.30134	17.2079	4.29e-05	-8.0068	0.186423	Gene Body	ENSSSCG00000005720	MED27
1	271910001	271911000	11.3389	0.00093229	14.7225	0.00268334	7.28819	0.301294	Gene Body	ENSSSCG00000005720	MED27
1	271928001	271929000	5.30961	0.00615209	0.2263	0.706848	15.0595	5.48e-08	Promoter	ENSSSCG00000005720	MED27
1	271987001	271988000	4.4503	0.283458	14.2643	0.025647	-2.709	0.725447	Intergenic	NA	NA
1	271999001	272000000	8.18971	0.108629	3.92157	0.816114	13.6244	0.0227777	Intergenic	NA	NA
1	272016001	272017000	14.1977	3.16e-06	17.3836	0.0050864	15.7918	0.00389416	Gene Body	ENSSSCG00000005723	NTNG2
1	272080001	272081000	-5.08033	0.134737	1.08959	0.905567	-10.667	0.0226931	Intergenic	NA	NA
1	272166001	272167000	-5.63502	0.286396	9.10336	0.0603593	-21.4359	4.8e-08	Gene Body	ENSSSCG00000005724	SETX
1	272183001	272184000	4.57963	0.20039	10.8332	0.00304195	-3.62797	0.557435	Gene Body	ENSSSCG00000005725
1	272196001	272197000	-10.4372	0.00053148	-11.6228	0.00673812	-7.76408	0.152065	Gene Body	ENSSSCG00000005725
1	272218001	272219000	2.67469	0.775469	-8.23088	0.190377	12.9838	0.0412436	Promoter	ENSSSCG00000005727	CFAP77
1	272288001	272289000	7.90326	0.0191984	17.6031	7.03e-05	-1.40914	0.876692	Gene Body	ENSSSCG00000005727	CFAP77
1	272309001	272310000	-5.50178	0.189974	4.44608	0.715578	-14.5492	0.0024985	Gene Body	ENSSSCG00000005727	CFAP77
1	272346001	272347000	-1.17563	0.895366	10.0423	0.0561223	-10.7496	0.0180974	Gene Body	ENSSSCG00000005727	CFAP77
1	272366001	272367000	6.08747	0.298335	-0.586978	0.855763	14.7537	0.0293607	Intergenic	NA	NA
1	272483001	272484000	-6.9129	0.00017875	-4.50469	0.264916	-11.4459	0.00040762	Intergenic	NA	NA
1	272534001	272535000	-5.52188	0.241618	-1.50584	0.917012	-10.8033	0.0414488	Gene Body	ENSSSCG00000039188	AK8
1	272536001	272537000	-7.54192	0.0694915	-17.2007	0.0144148	-1.67134	0.831211	Gene Body	ENSSSCG00000039188	AK8
1	272558001	272559000	8.22072	0.0218357	11.8629	0.0145408	3.27699	0.604457	Gene Body	ENSSSCG00000039188	AK8
1	272564001	272565000	4.79679	0.0786727	12.2329	0.00090862	-1.10376	0.830098	Gene Body	ENSSSCG00000039188	AK8
1	272568001	272569000	6.68829	0.202885	1.79552	0.862934	11.5393	0.0091752	Gene Body	ENSSSCG00000039188	AK8
1	272590001	272591000	8.08987	0.0439085	5.11628	0.53876	11.0107	0.0403461	Gene Body	ENSSSCG00000039188	AK8
1	272618001	272619000	5.08556	0.306561	12.333	0.00457437	-3.02313	0.615429	Gene Body	ENSSSCG00000039188	AK8
1	272620001	272621000	-2.41233	0.515175	4.06618	0.411211	-10.4998	0.0108123	Gene Body	ENSSSCG00000039188	AK8
1	272707001	272708000	-10.31	0.00018554	-7.46921	0.282362	-20.779	0.00012398	Gene Body	ENSSSCG00000005737	GFI1B
1	272724001	272725000	9.48604	0.0617152	2.66922	0.684868	16.8806	0.0216207	Intergenic	NA	NA
1	272737001	272738000	12.6029	1.36e-14	7.94033	0.0533486	19.8418	1.1e-14	Intergenic	NA	NA
1	272759001	272760000	0.362991	0.592355	-9.15154	0.162047	16.903	0.00014289	Gene Body	ENSSSCG00000032110
1	272800001	272801000	-14.3116	6.07e-08	-17.1633	4.93e-06	-15.017	0.0378237	Promoter	ENSSSCG00000005738
1	272814001	272815000	-6.66274	0.00635173	-2.72003	0.620318	-11.3071	0.0020813	Promoter	ENSSSCG00000005738
1	272817001	272818000	-5.22409	0.0631439	-10.0106	0.00986399	2.9764	0.906388	Promoter	ENSSSCG00000005738
1	272820001	272821000	9.43456	0.00156497	6.82602	0.199865	12.7575	0.0109473	Gene Body	ENSSSCG00000005738
1	272823001	272824000	7.49157	0.11806	-8.81997	0.606532	20.5322	6.1e-05	Promoter	ENSSSCG00000005738
1	272877001	272878000	-18.2749	1.87e-13	-16.1998	0.00078425	-22.0597	3.43e-10	Gene Body	ENSSSCG00000035904	RPL7A
1	272955001	272956000	-5.15009	0.0103369	-11.5471	0.00283058	-4.81457	0.599071	Promoter	ENSSSCG00000032106	SURF6
1	273002001	273003000	-4.44961	0.260055	5.90267	0.694497	-22.5411	0.00109868	Gene Body	ENSSSCG00000031407	STKLD1
1	273006001	273007000	11.6426	0.0300093	3.12598	0.872341	18.6279	9.56e-05	Gene Body	ENSSSCG00000031407	STKLD1
1	273022001	273023000	3.48133	0.0321798	-9.17882	0.456088	14.0553	1.41e-07	Promoter	ENSSSCG00000023173	REXO4
1	273024001	273025000	6.65094	0.0139744	1.34876	0.367995	10.9474	0.0308693	Promoter	ENSSSCG00000021241	ADAMTS13
1	273032001	273033000	-6.23172	0.00867204	-11.7392	0.0190175	-1.24662	0.384834	Promoter	ENSSSCG00000040709	CACFD1
1	273071001	273072000	-5.19032	0.216769	-10.8324	0.0191464	1.13017	0.81988	Gene Body	ENSSSCG00000024166	SLC2A6
1	273077001	273078000	-4.26668	0.0446912	1.72854	0.832809	-12.5424	0.00038726	Promoter	ENSSSCG00000024166	SLC2A6
1	273120001	273121000	6.64535	0.00649961	13.4369	8.81e-06	-1.09096	0.86531	Promoter	ENSSSCG00000026425	ADAMTSL2
1	273145001	273146000	-4.37619	0.0499566	-2.57883	0.673908	-10.9626	0.0191271	Gene Body	ENSSSCG00000026425	ADAMTSL2
1	273149001	273150000	-0.947256	0.862433	-15.6065	0.0139466	8.49773	0.0104126	Gene Body	ENSSSCG00000026425	ADAMTSL2
1	273249001	273250000	11.3765	0.0119193	15.0366	0.00725696	5.11698	0.592943	Gene Body	ENSSSCG00000005740	SARDH
1	273277001	273278000	3.65834	0.264484	10.4507	0.00446042	-4.62026	0.540374	Gene Body	ENSSSCG00000005740	SARDH
1	273311001	273312000	6.80072	0.22987	-0.725222	0.819288	14.4964	0.0220278	Gene Body	ENSSSCG00000005743	VAV2
1	273394001	273395000	9.08112	0.11635	-1.49274	0.909184	19.5742	0.00103471	Gene Body	ENSSSCG00000005743	VAV2
1	273435001	273436000	-3.90096	0.406677	1.08242	0.855692	-11.8166	0.0438264	Gene Body	ENSSSCG00000005743	VAV2
1	273497001	273498000	6.31155	0.0312017	-1.71397	0.738736	13.9218	1.22e-05	Promoter	ENSSSCG00000045435
1	273540001	273541000	7.11434	0.0141466	-1.18303	0.794121	14.8839	7.04e-06	Intergenic	NA	NA
1	273596001	273597000	11.9111	6.86e-06	3.68572	0.247441	19.928	4.42e-06	Intergenic	NA	NA
1	273614001	273615000	-5.6615	0.327173	-13.4867	0.0121815	3.65025	0.600923	Promoter	ENSSSCG00000044746
1	273666001	273667000	9.08165	0.00100643	2.94224	0.658367	16.6978	1.2e-05	Promoter	ENSSSCG00000049305
1	273670001	273671000	4.23678	0.253999	-1.45675	0.547007	11.0136	0.0003186	Gene Body	ENSSSCG00000049305
1	273673001	273674000	-4.69765	0.408294	-16.5748	0.00109555	13.5813	0.111807	Gene Body	ENSSSCG00000049305
1	273705001	273706000	6.44219	0.0504467	19.4028	1.88e-06	-9.27275	0.135502	Promoter	ENSSSCG00000038220	RXRA
1	273713001	273714000	10.2851	0.0356541	9.18929	0.00039642	7.15487	0.849005	Promoter	ENSSSCG00000038220	RXRA
1	273714001	273715000	5.10572	0.201061	1.39351	0.864135	10.0593	0.0115679	Promoter	ENSSSCG00000038220	RXRA
1	273720001	273721000	10.3909	0.286349	17.8632	0.01044	2.06822	0.81791	Promoter	ENSSSCG00000038220	RXRA
1	273745001	273746000	-10.2854	0.00054685	-11.2171	0.116499	-11.797	0.011055	Promoter	ENSSSCG00000038220	RXRA
1	273749001	273750000	-6.37415	0.0166053	-10.5473	0.00398613	-3.3371	0.602805	Gene Body	ENSSSCG00000038220	RXRA
1	273754001	273755000	11.1263	0.154275	12.3744	0.0313981	3.66037	0.774163	Promoter	ENSSSCG00000038220	RXRA
1	273758001	273759000	8.51049	0.0100741	13.7901	0.00448357	2.90903	0.540836	Promoter	ENSSSCG00000038220	RXRA
1	273798001	273799000	-6.60588	0.0056943	0.643818	0.564644	-13.6939	0.00323161	Intergenic	NA	NA
1	273799001	273800000	8.15487	0.16727	18.2946	0.00055318	-3.35141	0.580033	Intergenic	NA	NA
1	273818001	273819000	-4.75534	0.0332825	0.207328	0.906814	-11.795	0.00030869	Intergenic	NA	NA
1	273819001	273820000	-9.63922	0.0138416	-15.4354	0.00234	-5.50134	0.647542	Intergenic	NA	NA
1	274144001	274145000	-3.24032	0.231589	-10.0252	0.0233486	3.82206	0.805798	Intergenic	NA	NA
1	274235001	274236000	10.151	0.00255094	6.28554	0.102637	12.6207	0.0501225	Promoter	ENSSSCG00000029715	OLFM1
1	274251001	274252000	-2.89446	0.605314	-13.3132	0.0131617	6.22004	0.269838	Gene Body	ENSSSCG00000029715	OLFM1
1	274276001	274277000	-3.76916	0.59012	-18.6202	0.0125851	10.8105	0.167279	Promoter	ENSSSCG00000041239
1	274285001	274286000	-6.67394	0.198028	-13.7309	0.015575	3.98588	0.755871	Intergenic	NA	NA
1	274290001	274291000	-9.66219	0.00028854	-12.1121	8.04e-05	-7.27388	0.353002	Intergenic	NA	NA
1	274295001	274296000	-12.4509	4.24e-05	-19.7652	0.00504618	-8.83672	0.0328719	Intergenic	NA	NA
1	274302001	274303000	-3.72879	0.551575	-11.7562	0.0139171	4.90358	0.326425	Intergenic	NA	NA
1	274306001	274307000	11.9127	2.43e-09	19.2998	9.14e-12	4.98793	0.317525	Intergenic	NA	NA
1	274309001	274310000	3.7752	0.678265	11.1523	0.0357208	-7.97646	0.231811	Intergenic	NA	NA
2	7001	8000	1.25051	0.779037	-3.495	0.383512	11.4881	0.0187293	Intergenic	NA	NA
2	90001	91000	5.68085	0.112559	27.5519	9.22e-13	-13.6172	0.00320216	Promoter	ENSSSCG00000014561	NLRP6
2	93001	94000	-4.42996	0.856538	5.75271	0.00114677	-18.5512	0.00049861	Gene Body	ENSSSCG00000014565
2	99001	100000	9.25638	0.00305445	4.83076	0.396917	12.6002	0.00519126	Promoter	ENSSSCG00000025023	PGGHG
2	179001	180000	1.99932	0.90563	-6.80154	0.166981	16.0214	0.0403797	Promoter	ENSSSCG00000038005
2	220001	221000	8.95267	0.199578	-1.72524	0.618342	21.5894	0.00072372	Gene Body	ENSSSCG00000027302	PKP3
2	225001	226000	-11.0676	0.0177876	-18.5011	0.0202438	-4.90062	0.516856	Gene Body	ENSSSCG00000024389	SIGIRR
2	232001	233000	-4.02203	0.414025	3.30573	0.795623	-14.7337	0.0489595	Promoter	ENSSSCG00000024389	SIGIRR
2	242001	243000	-1.47563	0.877121	-14.1975	0.00172089	16.4949	0.00023469	Gene Body	ENSSSCG00000024569	ANO9
2	272001	273000	8.41799	0.00023289	11.3959	0.00064454	5.65595	0.216847	Gene Body	ENSSSCG00000037427	PTDSS2
2	288001	289000	9.02955	0.00012904	-2.32674	0.814173	27.2627	2.06e-12	Promoter	ENSSSCG00000032010	RNH1
2	324001	325000	-5.76195	0.00553719	1.60027	0.833258	-14.4443	2.11e-05	Gene Body	ENSSSCG00000030137	LMNTD2
2	330001	331000	5.89234	0.130107	3.11897	0.918191	12.8999	0.017855	Promoter	ENSSSCG00000030137	LMNTD2
2	374001	375000	-7.57607	0.00035886	-13.812	1.94e-05	-2.08597	0.639052	Promoter	ENSSSCG00000012853	IRF7
2	382001	383000	7.63254	0.00096785	13.212	0.00990229	4.41873	0.151386	Promoter	ENSSSCG00000012852	CDHR5
2	435001	436000	12.3573	4.1e-08	-5.42626	0.921872	22.6464	1.09e-13	Promoter	ENSSSCG00000012848	EPS8L2
2	453001	454000	-6.74446	0.686126	3.32059	0.363947	-21.3159	0.0217795	Gene Body	ENSSSCG00000012842	RPLP2
2	495001	496000	-2.51398	0.340103	-10.5784	0.00066725	5.18608	0.281879	Gene Body	ENSSSCG00000012842	RPLP2
2	519001	520000	1.10742	0.33501	-8.55586	0.77982	17.2143	0.0183522	Promoter	ENSSSCG00000023933	CRACR2B
2	521001	522000	12.5121	0.00012464	14.7708	0.00088507	10.4343	0.127001	Promoter	ENSSSCG00000023933	CRACR2B
2	524001	525000	7.59172	0.412261	-0.542328	0.411476	15.3189	0.00721329	Promoter	ENSSSCG00000012840	CD151
2	533001	534000	-0.478922	0.869582	10.2276	0.0443518	-10.6121	0.0679305	Promoter	ENSSSCG00000012838	TSPAN4
2	538001	539000	4.47463	0.536847	16.3441	0.0137317	-7.45236	0.49383	Promoter	ENSSSCG00000012838	TSPAN4
2	540001	541000	-2.57297	0.627983	4.81914	0.157884	-10.8056	0.0111688	Promoter	ENSSSCG00000012838	TSPAN4
2	579001	580000	-4.34334	0.0922773	-11.6075	0.0149258	5.00034	0.841505	Promoter	ENSSSCG00000012836	AP2A2
2	581001	582000	4.35839	0.242699	10.8315	5.12e-05	-3.56682	0.172102	Promoter	ENSSSCG00000012836	AP2A2
2	586001	587000	-6.46592	0.122518	-2.16471	0.866613	-14.1383	0.00381462	Gene Body	ENSSSCG00000012836	AP2A2
2	790001	791000	-0.152284	0.872864	-8.28594	0.117608	10.6804	0.0177483	Gene Body	ENSSSCG00000033382
2	828001	829000	5.71037	0.164124	12.0955	0.00444848	-0.501147	0.776582	Gene Body	ENSSSCG00000033452
2	862001	863000	5.57655	0.162528	14.1296	0.00189561	-4.29926	0.578688	Promoter	ENSSSCG00000033033	TOLLIP
2	871001	872000	1.43618	0.808617	-8.57561	0.157361	12.0292	0.0240463	Intergenic	NA	NA
2	903001	904000	6.24997	0.495605	13.2555	0.021441	1.74794	0.500318	Gene Body	ENSSSCG00000037337	BRSK2
2	1001001	1002000	7.12779	0.0692626	11.1527	0.0107935	0.824727	0.860745	Gene Body	ENSSSCG00000031903	TNNT3
2	1008001	1009000	12.6436	2.39e-09	4.98451	0.302497	20.2697	8.46e-14	Gene Body	ENSSSCG00000031903	TNNT3
2	1013001	1014000	-9.70597	0.0364201	-6.38157	0.59078	-10.2907	0.0296145	Gene Body	ENSSSCG00000031903	TNNT3
2	1076001	1077000	10.249	0.0423495	17.769	0.00315958	1.28924	0.780727	Promoter	ENSSSCG00000036180
2	1093001	1094000	4.29674	0.21112	-3.36623	0.478883	11.2742	0.00033977	Gene Body	ENSSSCG00000031903	TNNT3
2	1146001	1147000	-5.8056	0.0677046	-0.172459	0.718447	-11.8126	0.0291952	Gene Body	ENSSSCG00000031903	TNNT3
2	1174001	1175000	6.51807	0.0347154	1.74795	0.743088	13.7837	0.00213827	Gene Body	ENSSSCG00000031903	TNNT3
2	1201001	1202000	-2.22553	0.200031	3.13089	0.375906	-10.4164	6.9e-05	Gene Body	ENSSSCG00000031903	TNNT3
2	1206001	1207000	-9.05132	0.00032627	-7.93752	0.110958	-11.0735	0.00699217	Gene Body	ENSSSCG00000031903	TNNT3
2	1248001	1249000	9.57882	0.0160499	3.66857	0.613623	15.4686	0.00520947	Promoter	ENSSSCG00000023537	SYT8
2	1273001	1274000	8.6864	0.00085248	4.85138	0.460789	12.1088	0.00012171	Promoter	ENSSSCG00000031487	LSP1
2	1279001	1280000	-8.4183	0.0761008	-11.4615	0.0170333	-5.19644	0.852676	Gene Body	ENSSSCG00000031903	TNNT3
2	1280001	1281000	4.42666	0.504751	12.9967	0.00713484	-8.72814	0.25466	Gene Body	ENSSSCG00000031903	TNNT3
2	1318001	1319000	-9.19098	0.00039028	-8.70169	0.0582647	-10.2145	0.0185524	Intergenic	NA	NA
2	1374001	1375000	4.20229	0.699471	-3.48325	0.421615	12.3089	0.0479758	Intergenic	NA	NA
2	1375001	1376000	-11.6772	2.83e-06	-17.102	5.95e-11	-6.67085	0.227695	Intergenic	NA	NA
2	1384001	1385000	6.04615	0.0150647	-0.983096	0.861488	14.7162	4.28e-05	Promoter	ENSSSCG00000050649
2	1385001	1386000	3.05188	0.866197	-15.6138	0.00276227	12.5752	0.0152043	Promoter	ENSSSCG00000050649
2	1386001	1387000	15.3993	4.03e-13	0.908526	0.529298	31.9827	4.28e-21	Promoter	ENSSSCG00000050649
2	1414001	1415000	-7.31372	0.174196	-3.19917	0.888323	-21.6337	0.0231794	Intergenic	NA	NA
2	1453001	1454000	-3.00334	0.396627	3.10819	0.479665	-10.0195	0.00135867	Intergenic	NA	NA
2	1466001	1467000	-6.16543	0.0956676	-11.6019	0.016995	0.0463541	0.849088	Intergenic	NA	NA
2	1470001	1471000	-4.89007	0.132628	2.50285	0.746038	-12.4686	3.03e-05	Gene Body	ENSSSCG00000035293
2	1484001	1485000	11.3233	0.0953633	6.86415	0.700582	19.8739	0.0224739	Gene Body	ENSSSCG00000035293
2	1491001	1492000	6.56062	0.161777	-0.151989	0.900126	12.7611	0.0173905	Gene Body	ENSSSCG00000035293
2	1520001	1521000	-3.89295	0.539138	7.28923	0.421316	-16.6124	0.00274328	Gene Body	ENSSSCG00000039243	CD81
2	1558001	1559000	11.4093	0.0302472	21.8663	6.26e-05	-4.16446	0.809038	Promoter	ENSSSCG00000033507	ASCL2
2	1561001	1562000	13.1285	0.00012029	20.3375	1.95e-06	4.52409	0.619638	Promoter	ENSSSCG00000033507	ASCL2
2	1562001	1563000	10.6808	0.00656891	10.758	0.0778404	11.1643	0.132336	Promoter	ENSSSCG00000033507	ASCL2
2	1584001	1585000	-9.02383	0.00019924	-6.74702	0.354811	-13.1616	0.00012381	Promoter	ENSSSCG00000033880	TSPAN32
2	1596001	1597000	6.3807	0.188915	0.133251	0.916537	12.9025	0.0189742	Gene Body	ENSSSCG00000039243	CD81
2	1630001	1631000	-0.117329	0.151332	13.469	2.41e-05	-11.9861	0.498652	Gene Body	ENSSSCG00000039243	CD81
2	1646001	1647000	5.60403	0.0803222	-2.21432	0.809909	12.4875	0.0241491	Gene Body	ENSSSCG00000039644
2	1675001	1676000	-7.28498	5.28e-05	-3.62751	0.290282	-10.4928	6.46e-05	Promoter	ENSSSCG00000039556	KCNQ1
2	1684001	1685000	6.57156	0.307619	-4.75904	0.572859	17.7237	0.00050062	Gene Body	ENSSSCG00000039556	KCNQ1
2	1693001	1694000	-10.385	9.02e-08	-9.04848	0.00861669	-12.3991	8.31e-05	Gene Body	ENSSSCG00000039556	KCNQ1
2	1695001	1696000	-10.3517	0.024503	-14.474	0.0252012	-5.99392	0.519143	Gene Body	ENSSSCG00000039556	KCNQ1
2	1714001	1715000	-2.66163	0.346998	7.31578	0.356362	-14.7908	0.00025199	Gene Body	ENSSSCG00000039556	KCNQ1
2	1733001	1734000	10.9585	9.45e-05	8.76648	0.0371359	12.9817	0.00915397	Gene Body	ENSSSCG00000039556	KCNQ1
2	1788001	1789000	8.77453	0.00021406	1.70229	0.830148	16.7828	8.8e-09	Gene Body	ENSSSCG00000039556	KCNQ1
2	1886001	1887000	8.58632	0.108783	11.2464	0.0197718	0.0343819	0.876806	Gene Body	ENSSSCG00000039556	KCNQ1
2	1902001	1903000	-7.72468	0.00954602	-7.41353	0.778839	-11.6151	0.00042337	Gene Body	ENSSSCG00000039556	KCNQ1
2	1913001	1914000	-4.05746	0.179174	2.69759	0.614038	-10.5266	0.00076768	Gene Body	ENSSSCG00000039556	KCNQ1
2	1921001	1922000	-8.88271	8.11e-05	-10.3057	0.0174788	-8.531	0.0163811	Gene Body	ENSSSCG00000039556	KCNQ1
2	1923001	1924000	4.407	0.048379	13.1233	5.64e-05	-3.66219	0.865385	Gene Body	ENSSSCG00000039556	KCNQ1
2	1968001	1969000	-7.66422	0.0127603	-4.39257	0.672755	-11.727	0.00315165	Gene Body	ENSSSCG00000039556	KCNQ1
2	2057001	2058000	5.47598	0.0613392	12.5243	0.00017132	-0.652757	0.826622	Promoter	ENSSSCG00000021597	PHLDA2
2	2084001	2085000	-3.54975	0.335947	2.35365	0.676743	-10.5227	0.0106866	Promoter	ENSSSCG00000032948
2	2118001	2119000	-9.14041	0.0560186	0.25974	0.910475	-17.937	0.00063713	Promoter	ENSSSCG00000012856	NAP1L4
2	2235001	2236000	-8.76385	0.0440326	-4.35463	0.632137	-14.0713	0.0336397	Promoter	ENSSSCG00000012862	OSBPL5
2	2239001	2240000	-5.08212	0.201908	-1.6697	0.871372	-13.0703	0.0396951	Gene Body	ENSSSCG00000012862	OSBPL5
2	2240001	2241000	4.25088	0.580301	-5.00938	0.743693	22.5042	0.0470407	Gene Body	ENSSSCG00000012862	OSBPL5
2	2257001	2258000	-10.2867	0.0480324	-4.9244	0.894757	-17.386	0.00019848	Gene Body	ENSSSCG00000012862	OSBPL5
2	2262001	2263000	16.9213	3.46e-06	29.7608	2.31e-05	8.77656	0.0578434	Promoter	ENSSSCG00000012862	OSBPL5
2	2266001	2267000	6.74548	0.12361	15.1369	8.57e-05	-4.44304	0.364871	Gene Body	ENSSSCG00000012862	OSBPL5
2	2283001	2284000	3.0489	0.280054	-12.7301	0.0117343	13.5843	0.547893	Promoter	ENSSSCG00000012862	OSBPL5
2	2292001	2293000	-4.61764	0.0486447	-14.6372	0.00010775	4.03687	0.75181	Intergenic	NA	NA
2	2296001	2297000	5.21074	0.155163	-0.184515	0.838631	13.4594	0.0219201	Intergenic	NA	NA
2	2303001	2304000	-11.7956	0.0243157	-8.94401	0.235863	-13.3201	0.128318	Intergenic	NA	NA
2	2307001	2308000	-4.70063	0.116267	0	0.895016	-11.0963	0.00190012	Intergenic	NA	NA
2	2308001	2309000	-9.88719	0.0718115	-8.65699	0.744677	-14.7344	0.029911	Intergenic	NA	NA
2	2371001	2372000	7.17118	0.0657178	18.89	7.29e-05	-2.1028	0.817541	Promoter	ENSSSCG00000012859	NADSYN1
2	2547001	2548000	-4.81669	0.0223295	-0.13725	0.920341	-10.636	0.00010357	Gene Body	ENSSSCG00000033043	SHANK2
2	2606001	2607000	-5.49021	0.115627	-0.675932	0.706367	-11.1273	0.0470195	Gene Body	ENSSSCG00000033043	SHANK2
2	2607001	2608000	5.46464	0.107144	4.60632	0.869057	11.0572	0.00579218	Gene Body	ENSSSCG00000033043	SHANK2
2	2609001	2610000	-3.90077	0.312516	6.66561	0.74153	-13.2399	0.0073281	Gene Body	ENSSSCG00000033043	SHANK2
2	2628001	2629000	10.338	0.00061575	12.3877	0.0421289	9.84347	0.039952	Gene Body	ENSSSCG00000033043	SHANK2
2	2629001	2630000	12.8538	0.0050797	-2.78481	0.860078	25.9753	4.83e-07	Gene Body	ENSSSCG00000033043	SHANK2
2	2631001	2632000	5.65485	0.0140649	-0.0132482	0.803354	13.1105	0.00016246	Gene Body	ENSSSCG00000033043	SHANK2
2	2816001	2817000	4.58605	0.20663	-4.23225	0.668043	14.0855	0.00094392	Gene Body	ENSSSCG00000033043	SHANK2
2	2817001	2818000	10.1939	0.0244548	8.02375	0.422107	12.6603	0.0291724	Gene Body	ENSSSCG00000033043	SHANK2
2	2916001	2917000	-7.11346	0.0850572	-17.1773	0.00019766	1.55491	0.774685	Gene Body	ENSSSCG00000033043	SHANK2
2	2978001	2979000	-9.18941	0.523253	-15.2419	0.0465656	0.54065	0.464213	Gene Body	ENSSSCG00000033043	SHANK2
2	3017001	3018000	8.68599	6.7e-05	11.9641	0.00013636	5.35176	0.18473	Intergenic	NA	NA
2	3059001	3060000	-9.30102	0.00183563	-5.05939	0.278295	-14.2361	0.00213557	Promoter	ENSSSCG00000031769	CTTN
2	3137001	3138000	7.38839	0.00470282	2.38178	0.480626	10.3353	0.00442871	Gene Body	ENSSSCG00000037451	PPFIA1
2	3140001	3141000	-9.85986	1.73e-05	-3.70622	0.523003	-20.4883	6.59e-07	Gene Body	ENSSSCG00000037451	PPFIA1
2	3180001	3181000	5.95104	0.0869874	12.3973	0.0126851	-0.726895	0.862905	Promoter	ENSSSCG00000049480
2	3184001	3185000	-5.82074	0.0491061	-10.2815	0.0289633	-2.43468	0.650299	Intergenic	NA	NA
2	3203001	3204000	3.87989	0.79027	-8.87069	0.00413296	16.6026	0.00011688	Gene Body	ENSSSCG00000024158	ANO1
2	3204001	3205000	-5.95229	0.0579587	-11.6404	5.02e-06	0.56909	0.66283	Gene Body	ENSSSCG00000024158	ANO1
2	3245001	3246000	4.35709	0.827553	-1.59347	0.28604	13.5627	0.041364	Gene Body	ENSSSCG00000024158	ANO1
2	3251001	3252000	-5.78228	0.349966	-13.3832	0.00393247	6.14949	0.320197	Gene Body	ENSSSCG00000024158	ANO1
2	3358001	3359000	7.07716	0.0792414	3.20553	0.847564	12.286	0.00919474	Promoter	ENSSSCG00000024158	ANO1
2	3435001	3436000	5.101	0.0626655	2.20779	0.605325	12.2093	0.0401038	Intergenic	NA	NA
2	3452001	3453000	6.40014	0.263896	17.0561	0.0423399	-7.15978	0.810333	Intergenic	NA	NA
2	3526001	3527000	-6.68435	0.00046919	-3.24458	0.0590231	-10.6332	0.0204156	Promoter	ENSSSCG00000012870	FGF4
2	3548001	3549000	8.09762	0.236767	17.2453	0.0409402	-1.42548	0.906388	Intergenic	NA	NA
2	3554001	3555000	-5.19866	0.220701	1.45123	0.920234	-11.6793	0.0257996	Intergenic	NA	NA
2	3562001	3563000	-5.20936	0.133725	-11.8723	0.0403234	0.280319	0.845359	Intergenic	NA	NA
2	3580001	3581000	-8.94106	0.0179013	-12.203	0.0411186	-4.97361	0.404509	Intergenic	NA	NA
2	3597001	3598000	3.65084	0.255237	-4.09951	0.709466	12.2203	0.0108576	Intergenic	NA	NA
2	3625001	3626000	-3.5778	0.0814501	2.97296	0.845291	-11.086	2e-05	Gene Body	ENSSSCG00000037900	CCND1
2	3630001	3631000	-12.4636	2.57e-06	-8.7951	0.177253	-16.0943	5.13e-06	Gene Body	ENSSSCG00000037900	CCND1
2	3785001	3786000	-6.61809	0.151742	0.152537	0.774518	-15.3701	0.00336785	Intergenic	NA	NA
2	3788001	3789000	1.39092	0.521344	-8.50172	0.268417	14.5946	0.00064453	Intergenic	NA	NA
2	3853001	3854000	-5.89181	0.102351	-12.0353	0.00348957	2.14238	0.786658	Intergenic	NA	NA
2	3903001	3904000	-10.1562	0.0164912	-12.0823	0.044901	-4.95535	0.366398	Promoter	ENSSSCG00000048733
2	3909001	3910000	-2.83606	0.336256	-0.769556	0.816929	-11.4549	0.0303069	Intergenic	NA	NA
2	3953001	3954000	4.11855	0.291139	12.5444	0.0192968	-2.67503	0.77518	Promoter	ENSSSCG00000046954
2	3961001	3962000	-3.30993	0.265244	1.28479	0.702528	-11.6366	0.00112657	Gene Body	ENSSSCG00000046917
2	4018001	4019000	11.1465	0.198048	26.9266	0.00113627	-15.7882	0.141284	Intergenic	NA	NA
2	4023001	4024000	-7.90153	0.297815	11.1111	0.467615	-16.1162	0.0301226	Intergenic	NA	NA
2	4034001	4035000	-6.26477	0.107256	-4.48484	0.651605	-12.8506	0.0431993	Intergenic	NA	NA
2	4065001	4066000	-2.05589	0.378544	-11.9351	0.00232285	5.41139	0.502585	Intergenic	NA	NA
2	4066001	4067000	8.51722	0.33854	-5.58998	0.30324	25.9621	1.52e-05	Intergenic	NA	NA
2	4157001	4158000	-6.17006	0.0907988	-10.6437	0.0331667	-1.91816	0.7373	Promoter	ENSSSCG00000042011
2	4207001	4208000	8.56477	0.101305	4.56517	0.771298	11.6164	0.0371193	Intergenic	NA	NA
2	4224001	4225000	15.2283	2.11e-05	6.76435	0.358101	18.8365	3.26e-06	Intergenic	NA	NA
2	4356001	4357000	3.00204	0.470192	12.1391	0.00073243	-5.97588	0.212117	Promoter	ENSSSCG00000012883	GAL
2	4457001	4458000	-5.28648	0.0446016	3.53066	0.838328	-16.7845	3.1e-05	Gene Body	ENSSSCG00000012884	PPP6R3
2	4534001	4535000	-4.26282	0.328914	2.93818	0.803883	-11.4646	0.0367955	Gene Body	ENSSSCG00000012885	LRP5
2	4535001	4536000	6.03683	0.450342	-5.43312	0.378875	19.6294	0.0106609	Gene Body	ENSSSCG00000012885	LRP5
2	4549001	4550000	6.39224	0.342612	-0.631723	0.797731	12.4653	0.0459045	Gene Body	ENSSSCG00000012885	LRP5
2	4574001	4575000	-3.21008	0.166903	-11.8484	0.0164903	-0.318419	0.834624	Gene Body	ENSSSCG00000012885	LRP5
2	4633001	4634000	7.85609	0.188614	2.91287	0.892428	10.6998	0.0320674	Gene Body	ENSSSCG00000012885	LRP5
2	4665001	4666000	3.15749	0.573899	18.1806	0.0021768	-10.8605	0.154306	Gene Body	ENSSSCG00000045506
2	4681001	4682000	12.5018	6.72e-06	12.8984	0.00354549	12.4777	0.0102136	Promoter	ENSSSCG00000012886
2	4682001	4683000	7.31586	0.0399458	1.59828	0.718694	14.0984	0.00446851	Promoter	ENSSSCG00000012886
2	4909001	4910000	-5.14925	0.0361819	-11.5169	0.0302881	1.53827	0.628022	Gene Body	ENSSSCG00000012893	UNC93B1
2	4952001	4953000	9.74989	0.432172	-2.87406	0.634783	15.0989	0.043783	Promoter	ENSSSCG00000035645
2	4974001	4975000	-7.87971	0.0173206	-10.6594	0.0335951	-7.99068	0.406216	Intergenic	NA	NA
2	5009001	5010000	2.86607	0.197321	-10.0138	0.0302431	19.0018	5.89e-11	Promoter	ENSSSCG00000032003
2	5026001	5027000	4.85774	0.443414	12.119	0.0329849	-5.52304	0.492139	Promoter	ENSSSCG00000012902	CDK2AP2
2	5046001	5047000	2.58522	0.41709	-12.2609	0.291563	20.3107	0.00044548	Promoter	ENSSSCG00000012904	AIP
2	5049001	5050000	-10.556	0.00045006	-8.31652	0.140857	-13.4537	0.00560981	Promoter	ENSSSCG00000012904	AIP
2	5090001	5091000	9.17443	2.16e-05	8.33563	0.0883791	11.3401	0.00054661	Gene Body	ENSSSCG00000012910	RPS6KB2
2	5099001	5100000	7.96086	0.249401	-1.84345	0.737611	18.9855	0.00508403	Gene Body	ENSSSCG00000012911	CARNS1
2	5103001	5104000	11.9804	9.88e-05	14.5104	0.0205715	10.8705	0.0186564	Promoter	ENSSSCG00000012911	CARNS1
2	5112001	5113000	-4.79626	0.146659	4.12379	0.893075	-16.8144	0.00261144	Promoter	ENSSSCG00000012911	CARNS1
2	5116001	5117000	3.44136	0.711655	-1.32653	0.335751	10.3261	0.0102426	Promoter	ENSSSCG00000012912	TBC1D10C
2	5125001	5126000	-12.4124	0.00139954	-5.92705	0.565286	-27.6164	2.21e-05	Gene Body	ENSSSCG00000012913	PPP1CA
2	5135001	5136000	5.71847	0.123139	11.2695	0.00156755	-2.05993	0.73802	Intergenic	NA	NA
2	5151001	5152000	1.99464	0.0315378	11.6462	6.04e-05	-6.54269	0.673567	Gene Body	ENSSSCG00000012915
2	5199001	5200000	-2.47061	0.362763	7.09483	0.0370941	-15.0374	3.44e-08	Gene Body	ENSSSCG00000012917	ANKRD13D
2	5224001	5225000	-4.34948	0.16727	4.02643	0.919674	-12.3048	0.0254381	Gene Body	ENSSSCG00000012918	GRK2
2	5362001	5363000	6.27296	0.111994	0.648594	0.886161	11.2861	0.0163305	Intergenic	NA	NA
2	5381001	5382000	-11.4672	0.0006685	-7.31834	0.345056	-15.3878	5.31e-05	Intergenic	NA	NA
2	5382001	5383000	13.1022	0.00419211	18.4924	0.00040894	5.44998	0.834538	Intergenic	NA	NA
2	5407001	5408000	-5.37712	0.103948	-12.0548	0.00910019	1.18567	0.87962	Intergenic	NA	NA
2	5418001	5419000	9.01218	0.013711	5.49224	0.484102	13.7508	0.0205828	Gene Body	ENSSSCG00000024837	SYT12
2	5427001	5428000	-8.27362	0.00838711	-5.85428	0.260116	-11.2803	0.0398373	Gene Body	ENSSSCG00000024837	SYT12
2	5435001	5436000	4.96505	0.236962	10.4446	0.00300185	-1.89688	0.712183	Promoter	ENSSSCG00000024837	SYT12
2	5555001	5556000	-5.69042	0.188535	-12.8852	0.00149739	3.26987	0.498791	Gene Body	ENSSSCG00000012926	PC
2	5571001	5572000	-2.91377	0.456233	-10.5534	0.0225118	4.01227	0.532415	Gene Body	ENSSSCG00000012926	PC
2	5579001	5580000	6.1805	2.33e-09	12.6174	0.00341946	12.0767	1.28e-06	Promoter	ENSSSCG00000039360	LRFN4
2	5592001	5593000	10.1238	0.00871292	7.16394	0.180464	15.4664	0.0724449	Promoter	ENSSSCG00000012927	RCE1
2	5682001	5683000	3.56733	0.289098	-3.30762	0.657773	14.9361	0.00076072	Promoter	ENSSSCG00000029902	C11orf80
2	5704001	5705000	6.80191	0.130306	13.5767	0.00560136	2.61299	0.906388	Gene Body	ENSSSCG00000038508	SPTBN2
2	5706001	5707000	5.28034	0.293696	13.7075	0.0419626	-3.34986	0.79988	Gene Body	ENSSSCG00000038508	SPTBN2
2	5744001	5745000	9.21815	0.00357449	11.8931	0.00582974	6.1489	0.380456	Promoter	ENSSSCG00000038304
2	5776001	5777000	-5.17652	0.096591	-0.746548	0.843421	-11.2939	0.013058	Gene Body	ENSSSCG00000038304
2	5824001	5825000	-9.12898	5.85e-05	-5.67722	0.174644	-12.5806	0.00019658	Gene Body	ENSSSCG00000012934	CCS
2	5844001	5845000	-8.23013	0.0127603	-13.8475	0.00026606	-0.961307	0.897442	Intergenic	NA	NA
2	5958001	5959000	-7.93409	0.0230367	-2.62027	0.766854	-15.4982	0.00239025	Promoter	ENSSSCG00000012944	PELI3
2	6062001	6063000	-0.234253	0.890385	-14.9226	0.0415189	14.5125	0.0221531	Intergenic	NA	NA
2	6068001	6069000	-6.4194	0.0654657	-2.32271	0.843838	-10.6925	0.0151616	Promoter	ENSSSCG00000029949	CD248
2	6076001	6077000	14.9491	1.53e-08	11.0905	0.0232811	22.5293	5.57e-07	Intergenic	NA	NA
2	6098001	6099000	6.48722	0.00221655	12.1673	0.00028885	2.7149	0.531341	Promoter	ENSSSCG00000012953	YIF1A
2	6125001	6126000	-4.78417	0.0442944	-0.297795	0.653399	-10.0202	0.0257226	Promoter	ENSSSCG00000012955	RAB1B
2	6131001	6132000	-9.22903	0.328938	-3.07587	0.898893	-14.8905	0.031618	Intergenic	NA	NA
2	6141001	6142000	2.86916	0.319431	10.289	0.0102441	-3.48487	0.53003	Gene Body	ENSSSCG00000012956	PACS1
2	6247001	6248000	-3.07594	0.630735	-13.1802	0.00223399	6.16579	0.0937791	Intergenic	NA	NA
2	6305001	6306000	2.62328	0.127819	11.0289	2.15e-06	-4.09861	0.475902	Gene Body	ENSSSCG00000028015	GAL3ST3
2	6323001	6324000	5.44933	0.0193268	10.5042	0.00149043	1.60532	0.716492	Promoter	ENSSSCG00000012960	CST6
2	6336001	6337000	-7.98885	0.21988	-0.0436893	0.854341	-19.4503	0.0154713	Promoter	ENSSSCG00000012961
2	6380001	6381000	6.24088	0.176805	-2.28512	0.841535	10.921	0.0147635	Gene Body	ENSSSCG00000012964	TSGA10IP
2	6402001	6403000	9.59204	0.00130203	4.34198	0.289358	15.5475	0.00418721	Intergenic	NA	NA
2	6410001	6411000	-10.3737	0.00311705	-6.91879	0.426968	-16.8936	0.00273576	Promoter	ENSSSCG00000012966	C11orf68
2	6445001	6446000	-10.5489	0.0015284	-11.4094	0.0384828	-8.81963	0.0870268	Gene Body	ENSSSCG00000012969	FIBP
2	6449001	6450000	7.45116	0.00833419	0.150862	0.892768	15.5758	1.63e-06	Promoter	ENSSSCG00000012970	CTSW
2	6457001	6458000	-3.71808	0.100346	-11.097	0.0270918	6.50047	0.870608	Promoter	ENSSSCG00000012971	EFEMP2
2	6489001	6490000	6.75845	0.0473932	-1.40581	0.795329	15.2831	2.96e-05	Promoter	ENSSSCG00000047888
2	6508001	6509000	6.3565	0.113143	13.2107	0.00984025	-0.723965	0.898902	Gene Body	ENSSSCG00000044730
2	6537001	6538000	-6.27611	0.0202258	-2.31348	0.678737	-11.6671	0.00277316	Promoter	ENSSSCG00000027361	OVOL1
2	6548001	6549000	-0.92114	0.628644	9.31028	6.55e-06	-10.8044	0.00233855	Promoter	ENSSSCG00000012978	AP5B1
2	6552001	6553000	-10.2037	0.00044447	-8.67663	0.129571	-11.6329	0.00568231	Gene Body	ENSSSCG00000012978	AP5B1
2	6558001	6559000	9.1514	0.010078	12.5616	0.00508437	4.53814	0.620073	Intergenic	NA	NA
2	6566001	6567000	-9.52403	0.00217761	-3.75308	0.655555	-16.3229	7.44e-05	Gene Body	ENSSSCG00000012980	KAT5
2	6567001	6568000	-10.9089	0.0024661	-11.5968	0.316134	-9.5295	0.00585926	Gene Body	ENSSSCG00000012980	KAT5
2	6572001	6573000	10.9025	3.2e-06	14.2915	2.21e-06	6.81096	0.249923	Promoter	ENSSSCG00000012980	KAT5
2	6604001	6605000	8.68381	5.36e-06	7.85914	0.0094275	11.0762	0.00344058	Intergenic	NA	NA
2	6615001	6616000	-14.7711	1.63e-07	-13.55	0.104109	-18.1033	1.63e-06	Promoter	ENSSSCG00000012982	SIPA1
2	6648001	6649000	-11.233	1.69e-18	-13.7557	2.15e-13	-6.02844	0.00024097	Gene Body	ENSSSCG00000037531	MAP3K11
2	6699001	6700000	-2.21398	0.639973	8.00829	0.341167	-12.0352	0.0232034	Promoter	ENSSSCG00000012985	LTBP3
2	6706001	6707000	-5.99521	0.276316	-11.0248	0.0285149	0.358974	0.767928	Gene Body	ENSSSCG00000012985	LTBP3
2	6717001	6718000	7.04079	0.0279262	11.5868	0.036642	1.57684	0.505645	Gene Body	ENSSSCG00000012985	LTBP3
2	6719001	6720000	-4.68758	0.0798713	0.56035	0.539359	-10.1412	1.92e-05	Gene Body	ENSSSCG00000012985	LTBP3
2	6735001	6736000	-3.71688	0.629431	8.08548	0.540869	-18.0548	0.0401361	Promoter	ENSSSCG00000012984	SCYL1
2	6764001	6765000	5.75952	0.21248	1.43335	0.879771	11.9376	0.044408	Gene Body	ENSSSCG00000041050
2	6810001	6811000	-11.6672	0.0191125	-24.5536	4.26e-05	-1.41908	0.750294	Intergenic	NA	NA
2	6816001	6817000	-1.25703	0.576501	5.99817	0.548339	-10.4789	0.0401619	Intergenic	NA	NA
2	6819001	6820000	13.854	0.0261597	16.3549	0.079151	12.8241	0.36435	Intergenic	NA	NA
2	6996001	6997000	5.62142	0.342014	-8.24756	0.449717	15.2543	0.0105193	Promoter	ENSSSCG00000012998
2	6997001	6998000	5.16275	0.30824	-3.24373	0.754856	20.0535	0.00152382	Promoter	ENSSSCG00000012998
2	6998001	6999000	9.83061	0.00467635	12.6634	0.023293	5.30184	0.262073	Gene Body	ENSSSCG00000012999	CAPN1
2	7064001	7065000	6.13715	0.621461	-4.45261	0.561902	30.3633	0.0207517	Gene Body	ENSSSCG00000012999	CAPN1
2	7076001	7077000	-4.96643	0.0752765	-13.384	0.00028685	2.63243	0.719711	Promoter	ENSSSCG00000013003	ZNHIT2
2	7095001	7096000	-10.4227	0.0313888	-9.15999	0.17509	-11.6073	0.213996	Promoter	ENSSSCG00000013005	VPS51
2	7120001	7121000	-6.06005	0.151789	-17.0006	0.0061149	4.81322	0.752649	Intergenic	NA	NA
2	7133001	7134000	3.4495	0.423876	-8.19269	0.230001	16.199	0.00023087	Gene Body	ENSSSCG00000013010	NAALADL1
2	7167001	7168000	13.0645	3.3e-05	12.7498	0.0364709	14.0484	0.00381501	Promoter	ENSSSCG00000034387	ARL2
2	7254001	7255000	-15.5517	0.00330809	-18.9334	0.012697	-11.4279	0.300484	Promoter	ENSSSCG00000013016	PPP2R5B
2	7255001	7256000	-12.9198	5.42e-06	-13.8611	0.00142928	-24.995	0.0213481	Promoter	ENSSSCG00000013016	PPP2R5B
2	7277001	7278000	3.17694	0.383791	11.7872	0.00162916	-8.32963	0.285998	Gene Body	ENSSSCG00000023890	ATG2A
2	7309001	7310000	8.35316	0.00557024	14.624	0.00235401	2.31481	0.624312	Gene Body	ENSSSCG00000013017	EHD1
2	7312001	7313000	-6.76941	0.166029	-2.69927	0.874235	-12.6142	0.0253838	Gene Body	ENSSSCG00000013017	EHD1
2	7373001	7374000	-8.17414	0.00582553	-5.522	0.32777	-11.4302	0.00902568	Gene Body	ENSSSCG00000013020	MAP4K2
2	7377001	7378000	-7.84832	0.425193	-1.58188	0.56631	-15.2179	0.0371518	Gene Body	ENSSSCG00000013020	MAP4K2
2	7380001	7381000	3.11761	0.542546	-5.21356	0.444289	12.2821	0.0281435	Intergenic	NA	NA
2	7406001	7407000	-5.6588	0.0953897	-10.0112	0.0139319	-2.30196	0.822931	Promoter	ENSSSCG00000013022	PYGM
2	7409001	7410000	-6.88821	0.36513	-17.9903	0.0078022	2.57635	0.614033	Promoter	ENSSSCG00000013022	PYGM
2	7473001	7474000	-8.42486	0.0343352	0.30641	0.874989	-18.1326	0.00076309	Intergenic	NA	NA
2	7492001	7493000	-4.50054	0.264618	0.794764	0.757181	-14.2353	0.00397949	Gene Body	ENSSSCG00000033229
2	7533001	7534000	-6.07119	0.0936673	-2.24561	0.831543	-10.5794	0.0319435	Gene Body	ENSSSCG00000013024
2	7541001	7542000	4.72168	0.188721	10.5455	0.046962	-2.80423	0.783758	Gene Body	ENSSSCG00000013024
2	7620001	7621000	1.28676	0.660412	-8.29494	0.446575	12.9253	0.0437472	Promoter	ENSSSCG00000043801
2	7703001	7704000	13.052	0.00278824	3.92739	0.721547	27.4202	4.55e-06	Intergenic	NA	NA
2	7781001	7782000	-4.41631	0.289171	4.33843	0.454692	-13.8363	0.00049439	Promoter	ENSSSCG00000013042
2	7825001	7826000	-10.8267	0.0379366	-11.0749	0.359494	-13.3108	0.0927208	Promoter	ENSSSCG00000013031	KCNK4
2	7901001	7902000	-8.35007	5.42e-06	-5.23356	0.219983	-11.6579	8.84e-06	Gene Body	ENSSSCG00000013041	FERMT3
2	7907001	7908000	-6.86712	0.0524873	-2.42997	0.623761	-13.1234	0.0330438	Promoter	ENSSSCG00000013041	FERMT3
2	7952001	7953000	-15.7322	3.44e-07	-14.9025	0.00046923	-19.2308	0.00462264	Gene Body	ENSSSCG00000013043	MACROD1
2	8044001	8045000	-2.79457	0.58358	2.97999	0.391849	-13.7398	0.00311756	Gene Body	ENSSSCG00000013043	MACROD1
2	8123001	8124000	3.81592	0.0766654	-0.937828	0.909813	12.7063	0.00029715	Promoter	ENSSSCG00000022687	NAA40
2	8130001	8131000	12.1896	0.00459025	13.1516	0.0422166	8.29044	0.181803	Promoter	ENSSSCG00000022687	NAA40
2	8152001	8153000	3.58767	0.262384	-2.11092	0.919225	11.9869	0.0457791	Gene Body	ENSSSCG00000013049	RCOR2
2	8184001	8185000	-15.9268	0.0132681	-17.7065	0.171994	-18.1806	0.0974534	Gene Body	ENSSSCG00000013050	MARK2
2	8230001	8231000	-3.99685	0.265539	-10.8956	0.0263605	-0.170222	0.806715	Gene Body	ENSSSCG00000013048	SPINDOC
2	8287001	8288000	-6.51957	0.0036747	-0.979397	0.555047	-11.9873	3.63e-09	Gene Body	ENSSSCG00000031666	C11orf95
2	8288001	8289000	6.78061	0.0124279	2.92744	0.324633	10.6722	0.044773	Intergenic	NA	NA
2	8355001	8356000	-6.53927	0.0579727	-11.6836	0.00584154	-1.0832	0.87928	Promoter	ENSSSCG00000013052
2	8437001	8438000	-1.63234	0.488102	4.84569	0.604301	-10.2418	0.0128306	Gene Body	ENSSSCG00000026914	PLAAT3
2	8451001	8452000	-8.03369	0.0252834	-11.7258	0.0334047	-4.2335	0.464491	Intergenic	NA	NA
2	8499001	8500000	-1.60981	0.55227	5.85677	0.541674	-10.1344	0.0124756	Gene Body	ENSSSCG00000021482	PLAAT5
2	8536001	8537000	-10.3237	0.00037623	-7.23859	0.167515	-13.4423	0.00280389	Promoter	ENSSSCG00000027453
2	8743001	8744000	-6.9032	0.01769	-10.1138	0.0120788	-3.33333	0.598167	Gene Body	ENSSSCG00000025413
2	8775001	8776000	10.5498	0.00226485	13.0753	0.035086	7.49767	0.126827	Gene Body	ENSSSCG00000038346
2	8899001	8900000	17.1313	2.47e-14	12.5375	5.31e-05	22.863	2.91e-09	Gene Body	ENSSSCG00000022404	SLC3A2
2	8910001	8911000	15.3044	0.00031939	8.68498	0.116885	17.4095	0.00607391	Promoter	ENSSSCG00000049213	U2
2	8968001	8969000	-5.41645	0.123721	0.618971	0.871352	-11.6005	0.00787258	Promoter	ENSSSCG00000038711	TMEM223
2	9051001	9052000	14.1675	0.0235144	3.16483	0.807594	31.3268	7.61e-05	Promoter	ENSSSCG00000020823	BSCL2
2	9172001	9173000	8.59034	0.0075676	16.9127	0.00011406	-1.06661	0.840197	Gene Body	ENSSSCG00000013064	EEF1G
2	9173001	9174000	7.18463	0.00074556	14.4907	1.52e-05	1.13743	0.834723	Gene Body	ENSSSCG00000013064	EEF1G
2	9178001	9179000	12.0177	0.0492693	8.60223	0.697369	16.5809	0.0224752	Intergenic	NA	NA
2	9183001	9184000	9.21343	0.0446914	16.6065	0.00208337	2.52601	0.743105	Promoter	ENSSSCG00000033010
2	9207001	9208000	-4.67204	0.199338	0.358826	0.872555	-11.1936	0.0244573	Gene Body	ENSSSCG00000033010
2	9286001	9287000	12.8944	5.12e-05	14.0656	0.00654142	11.1192	0.0300107	Gene Body	ENSSSCG00000036669
2	9292001	9293000	-9.52526	0.0442273	-5.54228	0.528247	-14.3665	0.0486948	Intergenic	NA	NA
2	9300001	9301000	-6.81461	0.005983	-10.3291	0.00042157	-1.77899	0.79366	Promoter	ENSSSCG00000013060	SCGB1A1
2	9468001	9469000	-4.967	0.0601643	0.666207	0.871247	-11.6418	0.00880569	Intergenic	NA	NA
2	9490001	9491000	4.00863	0.288932	-3.41411	0.851647	12.2167	0.0233737	Intergenic	NA	NA
2	9501001	9502000	-7.23754	0.0972297	1.27717	0.873338	-19.2346	0.00677898	Intergenic	NA	NA
2	9537001	9538000	-2.09405	0.537269	-14.346	0.00047173	13.7943	0.0274274	Promoter	ENSSSCG00000014540
2	9551001	9552000	8.47859	0.00062135	5.97128	0.27085	12.2513	0.00082314	Promoter	ENSSSCG00000023090	BEST1
2	9629001	9630000	-20.421	7.3e-07	-18.8725	0.00078721	-19.9048	0.00455069	Gene Body	ENSSSCG00000013072	FADS2
2	9632001	9633000	-11.4105	6.77e-05	-10.5987	0.0327459	-14.1222	0.0064441	Gene Body	ENSSSCG00000013072	FADS2
2	9668001	9669000	-7.28034	0.0641596	-19.1667	2.85e-05	2.18495	0.757516	Promoter	ENSSSCG00000013072	FADS2
2	9693001	9694000	4.96954	0.0478416	-3.45136	0.873276	11.5541	0.00877293	Intergenic	NA	NA
2	9770001	9771000	4.81809	0.0315263	4.85163	0.394999	11.9599	0.0408898	Promoter	ENSSSCG00000013078
2	9782001	9783000	7.81806	0.00716101	17.2491	0.00057998	-3.87414	0.766407	Gene Body	ENSSSCG00000013078
2	9795001	9796000	3.3516	0.0653037	-4.90311	0.859223	12.6582	0.00326574	Promoter	ENSSSCG00000013078
2	9810001	9811000	-8.18379	0.127575	-4.46429	0.718394	-17.7318	0.0491154	Gene Body	ENSSSCG00000013079	DAGLA
2	9850001	9851000	10.7363	7.64e-05	4.26913	0.867479	18.8299	1.23e-10	Gene Body	ENSSSCG00000013079	DAGLA
2	9853001	9854000	8.00316	0.0450065	11.857	0.0335749	4.80396	0.589233	Gene Body	ENSSSCG00000013079	DAGLA
2	9867001	9868000	-10.9444	0.00597924	-9.98319	0.255293	-12.475	0.0327088	Intergenic	NA	NA
2	9873001	9874000	-7.58907	0.0559501	2.55086	0.904021	-24.7708	0.00037243	Intergenic	NA	NA
2	9876001	9877000	-9.01461	0.00883538	-5.12281	0.585028	-13.2908	0.00254007	Intergenic	NA	NA
2	9991001	9992000	-9.00922	0.00094434	-6.59033	0.32263	-11.3102	0.00184299	Gene Body	ENSSSCG00000021906	SYT7
2	10000001	10001000	6.5455	0.136811	11.6514	0.0262474	1.52249	0.89404	Gene Body	ENSSSCG00000021906	SYT7
2	10021001	10022000	-5.49377	0.231542	0.46613	0.877447	-14.5946	0.0114382	Intergenic	NA	NA
2	10051001	10052000	0.386551	0.691716	-9.88994	0.278085	13.4762	0.0211573	Intergenic	NA	NA
2	10056001	10057000	-7.29987	0.118377	-2.69018	0.892236	-12.1741	0.0151783	Intergenic	NA	NA
2	10059001	10060000	-11.8439	0.00025738	-9.61078	0.078495	-14.6086	0.00746381	Promoter	ENSSSCG00000043988
2	10088001	10089000	4.81674	0.122856	11.7225	0.00040308	-4.72008	0.472187	Promoter	ENSSSCG00000013082	SDHAF2
2	10131001	10132000	10.8379	1.13e-08	9.99846	0.0122628	11.9403	2.86e-06	Gene Body	ENSSSCG00000037843	TMEM138
2	10137001	10138000	-8.79268	0.00015218	-8.83339	0.0544912	-11.2024	0.0088696	Gene Body	ENSSSCG00000037843	TMEM138
2	10146001	10147000	5.97257	0.271883	-2.39414	0.722348	13.1801	0.0236248	Promoter	ENSSSCG00000013086	CYB561A3
2	10164001	10165000	4.42293	0.0385383	13.8852	0.00479937	-4.41142	0.783015	Promoter	ENSSSCG00000013087	TKFC
2	10205001	10206000	2.79338	0.344336	-6.56504	0.388012	14.0725	0.000316	Promoter	ENSSSCG00000013093	VWCE
2	10599001	10600000	-5.30789	0.135717	1.83132	0.914907	-14.2711	0.0141596	Promoter	ENSSSCG00000013098
2	10623001	10624000	11.9436	0.00135297	8.31211	0.288993	16.4484	0.00171341	Gene Body	ENSSSCG00000028762	VPS37C
2	10676001	10677000	-6.68843	0.114056	0.926782	0.907617	-19.6244	0.00263224	Intergenic	NA	NA
2	10703001	10704000	-8.10375	0.00668717	-0.252348	0.749251	-15.5849	0.00047727	Promoter	ENSSSCG00000044416
2	10714001	10715000	6.16029	0.0617855	1.79825	0.846547	12.5177	0.00480518	Promoter	ENSSSCG00000045898
2	10829001	10830000	3.06615	0.71112	-2.06665	0.614309	10.8025	0.0344751	Gene Body	ENSSSCG00000013110	TMEM109
2	10969001	10970000	-9.16016	0.0137482	-15.8086	3.52e-05	1.12498	0.831436	Promoter	ENSSSCG00000034847	MS4A15
2	10978001	10979000	-3.9568	0.489604	3.72428	0.601598	-11.9918	0.0294335	Intergenic	NA	NA
2	11005001	11006000	-5.39645	0.135165	1.17037	0.792385	-12.7333	0.00279008	Promoter	ENSSSCG00000030879	MS4A8
2	11226001	11227000	8.84258	0.0116515	3.68883	0.620249	14.7638	0.00148089	Promoter	ENSSSCG00000013100
2	11321001	11322000	-8.54061	0.0332461	-6.18953	0.414956	-12.8148	0.0419316	Promoter	ENSSSCG00000013102
2	11329001	11330000	-9.3504	0.0092258	-11.0712	0.0435172	-7.87879	0.260695	Promoter	ENSSSCG00000041746
2	11720001	11721000	7.66772	0.0202485	12.405	0.00249103	2.64027	0.752192	Promoter	ENSSSCG00000013119	STX3
2	12025001	12026000	-0.373966	0.905738	7.64787	0.0373388	-11.0852	0.0441399	Intergenic	NA	NA
2	12263001	12264000	-7.7582	0.507573	-19.4778	0.0248225	7.30928	0.403351	Intergenic	NA	NA
2	12411001	12412000	-6.43294	0.0580636	-10.1558	0.0257257	-3.37919	0.696283	Gene Body	ENSSSCG00000040088
2	12464001	12465000	2.73899	0.44175	-4.10954	0.596986	16.1389	0.00577889	Intergenic	NA	NA
2	12509001	12510000	-6.57148	0.0213503	-2.6858	0.721666	-11.314	0.00346298	Gene Body	ENSSSCG00000013155
2	13269001	13270000	-8.07709	0.0130702	-3.80204	0.472537	-12.6843	0.0157816	Gene Body	ENSSSCG00000013178	ZDHHC5
2	13284001	13285000	-7.78216	0.00380437	-12.679	0.00591768	-5.05957	0.394731	Promoter	ENSSSCG00000031442	CLP1
2	13342001	13343000	-15.4884	1.24e-06	-17.7286	0.00018844	-13.1216	0.0245013	Intergenic	NA	NA
2	13392001	13393000	6.47632	0.0239987	1.0687	0.797598	12.1173	0.00132826	Promoter	ENSSSCG00000039659	TIMM10
2	13420001	13421000	-11.0486	0.00506407	-18.1466	7.96e-05	-4.49353	0.854782	Gene Body	ENSSSCG00000036359	SLC43A1
2	13444001	13445000	4.69861	0.171365	14.3579	0.00069703	-5.92658	0.512271	Gene Body	ENSSSCG00000040919	RTN4RL2
2	13447001	13448000	-5.84378	0.116783	-10.1786	0.0426206	-1.44561	0.750575	Gene Body	ENSSSCG00000040919	RTN4RL2
2	13484001	13485000	-6.59911	0.0717273	0.992867	0.884664	-21.3729	0.00400429	Intergenic	NA	NA
2	13538001	13539000	11.6471	0.00112242	22.1774	5.79e-06	3.94538	0.797218	Gene Body	ENSSSCG00000027553
2	13887001	13888000	-8.27781	0.0160063	-5.47314	0.451236	-11.1515	0.0336671	Intergenic	NA	NA
2	14451001	14452000	-4.57915	0.414089	4.59212	0.583563	-12.4311	0.0208242	Gene Body	ENSSSCG00000031436
2	14507001	14508000	-7.38142	0.188721	1.0582	0.269114	-15.7004	0.00205678	Gene Body	ENSSSCG00000031436
2	14689001	14690000	10.0328	0.00949138	7.09849	0.450246	12.1726	0.0170193	Gene Body	ENSSSCG00000023709	PTPRJ
2	14699001	14700000	-8.9788	0.00267586	-4.88857	0.491926	-15.364	0.00148152	Gene Body	ENSSSCG00000023709	PTPRJ
2	14741001	14742000	-6.05255	0.261506	-0.28743	0.83862	-13.7687	0.0304094	Intergenic	NA	NA
2	14982001	14983000	-5.86345	0.0296544	-12.2822	2.88e-05	3.14631	0.691638	Promoter	ENSSSCG00000013232	MTCH2
2	15022001	15023000	8.77625	0.0650505	27.9667	3.52e-11	-16.6177	0.0167873	Intergenic	NA	NA
2	15068001	15069000	4.37388	0.216566	10.5878	0.0178697	-1.98684	0.758905	Promoter	ENSSSCG00000013233	CELF1
2	15195001	15196000	9.72598	0.00426452	17.7563	0.00328401	3.70144	0.609111	Gene Body	ENSSSCG00000013238	SLC39A13
2	15202001	15203000	-9.52487	0.161225	-12.3423	0.00302128	-3.76812	0.605404	Promoter	ENSSSCG00000013238	SLC39A13
2	15221001	15222000	-10.5812	0.0105586	-2.72288	0.815197	-22.6412	0.00027825	Intergenic	NA	NA
2	15227001	15228000	9.22483	0.0034924	9.51766	0.236972	10.8722	0.0150858	Promoter	ENSSSCG00000013237	SPI1
2	15232001	15233000	8.13286	0.00578527	12.7649	0.00564638	6.45183	0.479923	Promoter	ENSSSCG00000013237	SPI1
2	15343001	15344000	8.06688	0.00028762	4.6838	0.133934	10.5414	0.00503187	Gene Body	ENSSSCG00000013242	ACP2
2	15344001	15345000	-4.70124	0.427439	-12.5812	0.0213374	2.38251	0.576226	Gene Body	ENSSSCG00000013242	ACP2
2	15422001	15423000	-8.71433	0.0109114	-3.00994	0.725016	-13.628	0.00430556	Gene Body	ENSSSCG00000013246	C11orf49
2	15428001	15429000	-6.87635	0.378639	4.75465	0.658508	-21.6276	0.015844	Gene Body	ENSSSCG00000013246	C11orf49
2	15433001	15434000	-4.25537	0.420451	-10.6784	0.0413329	5.76968	0.423908	Gene Body	ENSSSCG00000013246	C11orf49
2	15680001	15681000	6.96575	0.0119531	3.14817	0.684276	12.161	0.0025366	Promoter	ENSSSCG00000013249	CKAP5
2	16145001	16146000	-1.79169	0.663763	12.0556	0.0477412	-11.1111	0.355529	Gene Body	ENSSSCG00000013259	DGKZ
2	16157001	16158000	19.7093	3.34e-11	11.8569	0.0195527	26.5771	2.03e-09	Gene Body	ENSSSCG00000013259	DGKZ
2	16178001	16179000	-7.61197	0.0598805	-0.326435	0.828128	-13.1692	0.00858278	Promoter	ENSSSCG00000013259	DGKZ
2	16458001	16459000	-7.19924	0.229431	-13.4159	0.0318698	2.27344	0.797627	Gene Body	ENSSSCG00000023974	PHF21A
2	16541001	16542000	4.79932	0.330645	12.2804	0.0116766	-4.05657	0.543719	Gene Body	ENSSSCG00000023974	PHF21A
2	16551001	16552000	-8.70976	0.0650907	-5.01024	0.636948	-13.6513	0.0382964	Promoter	ENSSSCG00000013266	LARGE2
2	16573001	16574000	14.7433	0.0111163	5.46161	0.768483	21.1652	0.00037562	Promoter	ENSSSCG00000013269	MAPK8IP1
2	16596001	16597000	9.89738	0.0436521	15.8236	0.0485244	4.32183	0.545691	Gene Body	ENSSSCG00000013270	CRY2
2	16673001	16674000	11.2676	0.00115185	9.36458	0.104563	12.5571	0.0220755	Intergenic	NA	NA
2	16712001	16713000	7.2652	0.138341	-1.55921	0.859469	15.77	0.00373895	Intergenic	NA	NA
2	16714001	16715000	-8.14223	0.0169708	-13.0764	0.00175537	-1.30358	0.805577	Promoter	ENSSSCG00000047584
2	16875001	16876000	-6.2443	0.275195	1.36872	0.763617	-13.8766	0.00769533	Intergenic	NA	NA
2	16945001	16946000	8.40302	0.0756779	-0.653914	0.777569	17.0527	0.00011944	Intergenic	NA	NA
2	16946001	16947000	-6.0293	0.139861	-13.6161	0.0170401	0.49465	0.861958	Intergenic	NA	NA
2	17016001	17017000	-8.02731	0.0817834	1.77465	0.777871	-18.0691	0.00022727	Intergenic	NA	NA
2	17170001	17171000	-2.86173	0.488181	4.54621	0.589112	-12.3133	0.0426226	Promoter	ENSSSCG00000043766
2	17198001	17199000	-8.46002	1.7e-05	0.904245	0.917569	-19.5776	1.09e-10	Gene Body	ENSSSCG00000013276	PRDM11
2	17257001	17258000	-5.60465	0.480449	5.11869	0.467531	-14.744	0.013759	Gene Body	ENSSSCG00000013276	PRDM11
2	17294001	17295000	1.6243	0.543736	-5.04751	0.577485	10.4406	0.034304	Intergenic	NA	NA
2	17421001	17422000	-11.5183	0.00093141	-19.2637	0.00013157	-2.38581	0.55463	Intergenic	NA	NA
2	17447001	17448000	5.60248	0.297607	-0.0100074	0.883447	12.8001	0.0464188	Promoter	ENSSSCG00000031819	TP53I11
2	17453001	17454000	6.58491	0.0766617	-1.49634	0.795231	19.1426	0.0124072	Gene Body	ENSSSCG00000031819	TP53I11
2	17464001	17465000	-6.0948	0.135131	-1.11643	0.856455	-10.8175	0.019098	Gene Body	ENSSSCG00000031819	TP53I11
2	17482001	17483000	-9.59559	3.67e-07	-10.4734	0.00311489	-10.1339	0.00088984	Gene Body	ENSSSCG00000013278	TSPAN18
2	17501001	17502000	2.60432	0.606131	10.5362	0.0138653	-6.59062	0.1633	Gene Body	ENSSSCG00000013278	TSPAN18
2	17504001	17505000	-4.35624	0.044772	-10.5234	0.0105148	2.9774	0.859596	Gene Body	ENSSSCG00000013278	TSPAN18
2	17585001	17586000	12.7969	0.00539833	7.94191	0.763679	19.2434	0.00036334	Gene Body	ENSSSCG00000013278	TSPAN18
2	17718001	17719000	-16.9313	2.13e-07	-14.9081	0.048607	-23.1922	1.11e-05	Intergenic	NA	NA
2	17730001	17731000	7.82435	0.278929	10.5006	0.0459204	-0.157802	0.836054	Intergenic	NA	NA
2	17773001	17774000	-4.73486	0.326457	1.90714	0.861146	-14.1093	0.0449175	Promoter	ENSSSCG00000029521	CD82
2	17774001	17775000	-10.0571	0.00236712	-10.9091	0.108683	-11.5786	0.0414014	Promoter	ENSSSCG00000029521	CD82
2	17795001	17796000	-8.73414	0.00966506	-3.89118	0.532838	-15.1741	0.00378904	Gene Body	ENSSSCG00000029521	CD82
2	17797001	17798000	-18.5552	0.00914058	-15.9408	0.0451589	-20.407	0.291465	Gene Body	ENSSSCG00000029521	CD82
2	17799001	17800000	-14.5328	0.00103139	-13.8913	0.0565037	-15.1521	0.0440135	Gene Body	ENSSSCG00000029521	CD82
2	17852001	17853000	-5.02953	0.199426	-10.6913	0.0177489	1.73802	0.775677	Intergenic	NA	NA
2	17877001	17878000	6.03269	0.162075	16.0211	0.0209738	-2.46706	0.877206	Intergenic	NA	NA
2	17893001	17894000	3.42165	0.253221	-7.74943	0.584105	17.0541	0.00099578	Intergenic	NA	NA
2	18238001	18239000	16.8109	1.64e-06	22.869	2.69e-05	9.17398	0.0820055	Gene Body	ENSSSCG00000013282	ACCS
2	18299001	18300000	-10.002	0.00055209	-3.86893	0.612545	-20.0061	1.79e-05	Gene Body	ENSSSCG00000040937	ACCSL
2	18312001	18313000	6.65046	0.0639996	10.0208	0.0248136	3.1329	0.899759	Gene Body	ENSSSCG00000040937	ACCSL
2	18402001	18403000	-12.3989	0.0232132	-3.46477	0.828788	-18.8103	0.00104984	Gene Body	ENSSSCG00000040937	ACCSL
2	18612001	18613000	11.1288	0.00088767	7.64124	0.238898	14.9409	0.00270436	Promoter	ENSSSCG00000021739	HSD17B12
2	18731001	18732000	-5.30878	0.155895	0.255827	0.84211	-12.1015	0.0297982	Gene Body	ENSSSCG00000048253
2	18770001	18771000	-6.27112	0.0189356	-3.54143	0.585426	-12.5814	0.00572989	Intergenic	NA	NA
2	18968001	18969000	7.87862	0.0142791	13.2337	0.00105513	2.03575	0.891866	Gene Body	ENSSSCG00000013285	API5
2	18994001	18995000	9.22577	4.49e-05	5.70892	0.441121	13.862	5.61e-07	Promoter	ENSSSCG00000013285	API5
2	20534001	20535000	5.43961	0.206641	-0.905226	0.909614	11.4598	0.0311784	Intergenic	NA	NA
2	20968001	20969000	-10.7996	0.043868	-10.7582	0.271159	-10.7639	0.181222	Intergenic	NA	NA
2	21791001	21792000	-6.67198	0.00023427	-3.29511	0.497912	-10.3375	1.41e-05	Intergenic	NA	NA
2	21918001	21919000	-10.5661	0.0504241	-3.69312	0.906674	-19.3861	0.00069055	Gene Body	ENSSSCG00000049735
2	22774001	22775000	-2.30302	0.654145	4.06327	0.503851	-10.2441	0.0391724	Intergenic	NA	NA
2	23348001	23349000	-9.91657	0.00899021	-6.40973	0.721143	-12.9259	0.00318967	Intergenic	NA	NA
2	24260001	24261000	-3.18861	0.444898	1.87135	0.733541	-10.619	0.0364491	Intergenic	NA	NA
2	24409001	24410000	-5.43181	0.11806	2.1223	0.837493	-11.6288	0.00364488	Intergenic	NA	NA
2	24416001	24417000	9.97002	0.0213656	8.8601	0.397661	14.929	0.0401619	Intergenic	NA	NA
2	24573001	24574000	9.73384	0.0147245	5.27448	0.499301	13.4612	0.0117868	Promoter	ENSSSCG00000026145	RAG1
2	24607001	24608000	-1.59484	0.450811	2.93832	0.677306	-11.3095	0.0156976	Gene Body	ENSSSCG00000038082	TRAF6
2	24820001	24821000	4.50291	0.379898	-5.96145	0.63509	14.2566	0.0197273	Promoter	ENSSSCG00000013293	COMMD9
2	24835001	24836000	-3.03131	0.281297	2.57263	0.642443	-10.3066	0.00164152	Gene Body	ENSSSCG00000013293	COMMD9
2	24908001	24909000	1.30741	0.596002	-5.21719	0.527384	10.1579	0.00925131	Gene Body	ENSSSCG00000013294	LDLRAD3
2	25043001	25044000	0.358503	0.835954	-9.2096	0.0285552	16.0406	0.00670251	Gene Body	ENSSSCG00000013294	LDLRAD3
2	25068001	25069000	11.0457	0.00601538	7.27266	0.258486	24.9571	0.0114068	Gene Body	ENSSSCG00000013294	LDLRAD3
2	25133001	25134000	8.3427	0.00215714	11.3742	0.00780265	8.36772	0.302255	Gene Body	ENSSSCG00000013294	LDLRAD3
2	25896001	25897000	-4.23133	0.381239	2.71267	0.771765	-16.2889	0.00236269	Gene Body	ENSSSCG00000044268
2	25903001	25904000	12.6781	0.00239395	13.0793	0.084932	12.3482	0.0579207	Gene Body	ENSSSCG00000044268
2	25973001	25974000	6.56231	0.120483	0.0546822	0.910229	12.3925	0.00773063	Intergenic	NA	NA
2	25977001	25978000	10.4762	0.00139815	12.2175	0.0247266	11.2563	0.124635	Intergenic	NA	NA
2	26298001	26299000	1.4898	0.910594	-11.1671	0.0227657	17.776	0.00228291	Gene Body	ENSSSCG00000013300	EHF
2	26597001	26598000	-3.83403	0.332934	3.13713	0.732209	-11.0098	0.022469	Gene Body	ENSSSCG00000013303	ABTB2
2	26684001	26685000	-8.09955	0.0536159	-4.167	0.75717	-12.0549	0.0175511	Gene Body	ENSSSCG00000013303	ABTB2
2	26735001	26736000	-5.96621	0.0866462	0.352662	0.901674	-11.7481	0.00876104	Gene Body	ENSSSCG00000013303	ABTB2
2	26954001	26955000	-12.1548	0.0104961	-13.5023	0.0415899	-9.25566	0.295715	Gene Body	ENSSSCG00000051171
2	26969001	26970000	-8.54199	0.00447906	-12.0432	0.00365647	-2.50565	0.545338	Gene Body	ENSSSCG00000051171
2	26976001	26977000	-1.7755	0.470945	5.87335	0.408368	-10.2118	0.00350298	Gene Body	ENSSSCG00000051171
2	27022001	27023000	-8.7261	0.0388524	-16.1937	0.00794009	-1.47237	0.710959	Intergenic	NA	NA
2	27132001	27133000	6.83955	0.00066976	10.035	0.00162916	4.92266	0.26725	Intergenic	NA	NA
2	27325001	27326000	-0.269125	0.899475	12.7004	0.00010205	-13.5213	8.82e-05	Gene Body	ENSSSCG00000013311	KIAA1549L
2	27445001	27446000	-6.25245	0.0659987	-2.53918	0.73629	-10.7507	0.0275287	Gene Body	ENSSSCG00000013311	KIAA1549L
2	27453001	27454000	-1.82902	0.74952	8.36316	0.0908444	-13.8814	0.00265518	Gene Body	ENSSSCG00000013311	KIAA1549L
2	27655001	27656000	-7.69732	0.0028254	-4.54875	0.379061	-11.0191	0.00686788	Gene Body	ENSSSCG00000013312	HIPK3
2	27686001	27687000	9.11905	0.00250471	3.18933	0.658327	13.937	0.00018406	Promoter	ENSSSCG00000013312	HIPK3
2	27747001	27748000	7.64982	0.00458163	4.87542	0.357074	10.6292	0.00599412	Intergenic	NA	NA
2	27929001	27930000	-0.715114	0.830276	-12.2807	0.00381767	10.5404	0.0273515	Promoter	ENSSSCG00000030326	TCP11L1
2	28425001	28426000	3.01069	0.591051	-4.84496	0.546347	13.446	0.0242286	Gene Body	ENSSSCG00000013316	WT1
2	28708001	28709000	14.5704	0.00094434	7.6065	0.238353	17.022	0.00602041	Promoter	ENSSSCG00000013318
2	28731001	28732000	3.83474	0.488908	11.3501	0.0305296	-5.54111	0.473501	Gene Body	ENSSSCG00000024950
2	28883001	28884000	-4.46973	0.230964	2.7234	0.78692	-12.8949	0.0109846	Intergenic	NA	NA
2	29702001	29703000	6.11187	0.157048	2.03125	0.886851	11.1579	0.025518	Gene Body	ENSSSCG00000013326
2	29991001	29992000	4.72503	0.287066	-0.76566	0.862579	12.386	0.0211562	Intergenic	NA	NA
2	30246001	30247000	6.63807	0.151034	-5.25204	0.597817	31.9339	4.6e-08	Gene Body	ENSSSCG00000013327	MPPED2
2	30263001	30264000	-2.58899	0.571655	6.84048	0.341363	-10.8169	0.0491104	Gene Body	ENSSSCG00000013327	MPPED2
2	30642001	30643000	-10.2464	0.047169	-5.76327	0.220656	-19.0547	0.183058	Intergenic	NA	NA
2	32212001	32213000	-4.41335	0.325716	4.80778	0.467408	-10.231	0.0269059	Gene Body	ENSSSCG00000013331	METTL15
2	32757001	32758000	6.87241	0.0418951	12.1542	0.0374408	3.28205	0.403154	Gene Body	ENSSSCG00000022806	LIN7C
2	32912001	32913000	-5.86646	0.111053	13.1003	0.828368	-14.0369	0.0120887	Gene Body	ENSSSCG00000013335	LGR4
2	32983001	32984000	1.87634	0.829804	-6.54201	0.142168	12.1287	0.0169766	Promoter	ENSSSCG00000013336	CCDC34
2	33895001	33896000	-9.77356	0.00228109	-10.7234	0.0394104	-8.56653	0.115398	Gene Body	ENSSSCG00000013339	ANO3
2	35257001	35258000	-2.28533	0.763071	3.79902	0.467961	-13.1815	0.0237944	Gene Body	ENSSSCG00000013341	LUZP2
2	35337001	35338000	-9.74113	0.0810999	-1.22291	0.879162	-15.6433	0.0323157	Gene Body	ENSSSCG00000013341	LUZP2
2	35667001	35668000	-3.13766	0.601602	3.5622	0.435308	-10.2567	0.0190364	Intergenic	NA	NA
2	36137001	36138000	2.42753	0.662656	11.5132	0.0356146	-6.79532	0.314337	Intergenic	NA	NA
2	36217001	36218000	-10.8256	0.019564	-11.1166	0.0557664	-10.4147	0.413991	Intergenic	NA	NA
2	37410001	37411000	-4.47209	0.423019	3.63514	0.697967	-12.1875	0.0275326	Intergenic	NA	NA
2	38704001	38705000	-9.06753	0.0429158	-13.4152	0.0202459	-3.39551	0.687625	Gene Body	ENSSSCG00000039940	NELL1
2	38813001	38814000	-1.87798	0.19001	-12.0102	0.0115329	0.87315	0.7569	Gene Body	ENSSSCG00000037705	SLC6A5
2	39052001	39053000	10.6088	0.00443147	7.52067	0.276184	11.3654	0.0112403	Promoter	ENSSSCG00000013349	HTATIP2
2	39359001	39360000	-5.06356	0.405435	-11.5798	0.0309369	3.24926	0.608034	Promoter	ENSSSCG00000013351	NAV2
2	39611001	39612000	-2.70875	0.79304	5.4825	0.403116	-13.8833	0.0473297	Gene Body	ENSSSCG00000013351	NAV2
2	39629001	39630000	-1.3181	0.802598	-9.60471	0.127992	10.0086	0.00812763	Promoter	ENSSSCG00000013351	NAV2
2	39634001	39635000	9.4517	0.0225171	5.92062	0.420683	11.8489	0.0445208	Gene Body	ENSSSCG00000013351	NAV2
2	39863001	39864000	-5.69422	0.415917	-16.5317	0.00959731	8.20463	0.379213	Gene Body	ENSSSCG00000013351	NAV2
2	39885001	39886000	-7.31007	0.0570252	-12.3851	0.00564959	-1.07135	0.853935	Gene Body	ENSSSCG00000013351	NAV2
2	39936001	39937000	7.10484	0.142434	12.3932	0.0443773	-1.21865	0.846441	Gene Body	ENSSSCG00000013351	NAV2
2	40310001	40311000	2.98525	0.261657	11.2121	0.00010147	-4.73475	0.239841	Promoter	ENSSSCG00000021688	ZDHHC13
2	40332001	40333000	-6.66577	0.00234755	-3.10536	0.312764	-10.6242	0.00402661	Intergenic	NA	NA
2	40352001	40353000	11.7763	0.017607	1.96807	0.855926	17.4293	5.46e-05	Intergenic	NA	NA
2	40517001	40518000	8.09487	0.0443777	12.5169	0.0333408	2.89453	0.623735	Promoter	ENSSSCG00000013358	PTPN5
2	40687001	40688000	-5.33013	0.355686	0.853825	0.780507	-13.9494	0.0116645	Intergenic	NA	NA
2	41028001	41029000	8.57201	0.00026959	4.60738	0.60108	13.4058	1.37e-06	Promoter	ENSSSCG00000035393	SAAL1
2	41630001	41631000	-1.10375	0.739449	5.46173	0.376992	-12.8797	0.0145671	Gene Body	ENSSSCG00000013377	USH1C
2	41759001	41760000	-8.42014	0.017948	-6.08334	0.517644	-17.5865	0.003264	Promoter	ENSSSCG00000042162	KCNJ11
2	41779001	41780000	3.28471	0.481624	-3.56428	0.622278	11.3735	0.0174517	Intergenic	NA	NA
2	41854001	41855000	-7.94792	0.0197632	-3.0461	0.576361	-14.6787	0.00780996	Gene Body	ENSSSCG00000025406	PIK3C2A
2	41903001	41904000	-9.54747	0.26827	-4.71445	0.477042	-14.8842	0.0289794	Gene Body	ENSSSCG00000025406	PIK3C2A
2	42107001	42108000	-8.25259	0.0131697	-10.6397	0.0347612	-7.35174	0.356268	Gene Body	ENSSSCG00000013382	PLEKHA7
2	42166001	42167000	-11.4099	0.00098645	-12.7781	0.00153033	-7.19888	0.378093	Promoter	ENSSSCG00000013382	PLEKHA7
2	42211001	42212000	-11.8194	0.00019666	-12.4574	0.00768882	-13.9143	0.067368	Gene Body	ENSSSCG00000013382	PLEKHA7
2	42302001	42303000	-6.71915	0.460207	-17.3982	0.0429863	1.98413	0.660741	Gene Body	ENSSSCG00000013382	PLEKHA7
2	42666001	42667000	-7.2676	0.000779	-11.5455	0.00220354	-4.40645	0.265115	Gene Body	ENSSSCG00000034191	SOX6
2	43188001	43189000	-12.5548	0.00650357	-17.7937	0.00260204	-7.39059	0.490501	Intergenic	NA	NA
2	43381001	43382000	5.68156	0.245593	-0.925154	0.848887	12.3017	0.0208385	Gene Body	ENSSSCG00000044508
2	43875001	43876000	5.09621	0.108135	-0.749559	0.86449	10.2017	0.0215776	Gene Body	ENSSSCG00000013385	INSC
2	43887001	43888000	-6.15603	0.177943	-1.45005	0.81295	-13.8369	0.0420017	Gene Body	ENSSSCG00000013385	INSC
2	43967001	43968000	-5.99385	0.132227	-1.59341	0.808996	-11.4446	0.0273199	Gene Body	ENSSSCG00000013385	INSC
2	44138001	44139000	10.8022	0.00073188	7.90932	0.43749	15.4577	0.00011078	Promoter	ENSSSCG00000013386
2	44249001	44250000	11.2666	0.0428175	25.1802	6.7e-05	2.54761	0.826074	Promoter	ENSSSCG00000013387
2	44250001	44251000	-2.19382	0.112448	-12.0107	0.0105578	-0.737564	0.882356	Promoter	ENSSSCG00000013387
2	44320001	44321000	5.13313	0.474171	2.70412	0.688326	10.5583	0.0493081	Gene Body	ENSSSCG00000035649
2	44367001	44368000	4.04526	0.514504	22.3994	0.00975644	-15.8806	0.0551765	Promoter	ENSSSCG00000035649
2	44376001	44377000	1.44448	0.862045	-9.37695	0.0131897	10.1849	0.0266864	Promoter	ENSSSCG00000013389	CYP2R1
2	44507001	44508000	-3.45589	0.440499	5.95879	0.177433	-13.2525	0.00043815	Gene Body	ENSSSCG00000013388	PDE3B
2	44835001	44836000	-4.4628	0.0987363	-14.4448	0.0211896	1.99367	0.821524	Intergenic	NA	NA
2	44900001	44901000	5.98323	0.0210791	15.0664	9.17e-08	-5.47437	0.344971	Gene Body	ENSSSCG00000033786
2	45794001	45795000	4.59007	0.19098	-3.80476	0.688639	15.585	0.00146951	Promoter	ENSSSCG00000013395	BTBD10
2	46291001	46292000	-7.82374	0.205782	-1.81335	0.852283	-20.8871	0.0109587	Intergenic	NA	NA
2	46364001	46365000	2.82113	0.448976	-1.76611	0.812978	11.1393	0.0473897	Intergenic	NA	NA
2	46398001	46399000	-3.53601	0.508399	2.74276	0.711252	-12.0086	0.0444517	Intergenic	NA	NA
2	46912001	46913000	-2.58225	0.764373	4.84134	0.274286	-13.6346	0.00627592	Gene Body	ENSSSCG00000028827	PARVA
2	47441001	47442000	5.68056	0.0232152	10.7883	0.00317203	1.17521	0.881158	Gene Body	ENSSSCG00000013401	DKK3
2	48525001	48526000	9.25375	0.0455747	14.3487	0.0202964	2.52525	0.816232	Intergenic	NA	NA
2	48546001	48547000	11.1648	0.0286898	11.3306	0.15893	6.65818	0.223902	Intergenic	NA	NA
2	48913001	48914000	6.4461	0.0652365	1.46762	0.858828	12.4246	0.00560569	Gene Body	ENSSSCG00000020720	MRVI1
2	49037001	49038000	-4.60555	0.0399062	3.1936	0.397932	-12.4122	0.00013816	Gene Body	ENSSSCG00000022492	AMPD3
2	49064001	49065000	-9.2177	1.38e-05	-8.06367	0.014063	-11.604	0.00391272	Gene Body	ENSSSCG00000022492	AMPD3
2	49074001	49075000	-8.08396	0.0162599	-3.8352	0.579497	-12.2674	0.0148713	Promoter	ENSSSCG00000022492	AMPD3
2	49127001	49128000	3.10565	0.532129	14.3101	0.0467554	-6.40681	0.378178	Intergenic	NA	NA
2	49839001	49840000	4.67236	0.511682	-1.68194	0.67049	13.161	0.00868054	Intergenic	NA	NA
2	49935001	49936000	-5.95724	0.112117	-0.796433	0.888347	-12.066	0.00588626	Intergenic	NA	NA
2	49946001	49947000	-7.49381	0.062308	-0.629912	0.887611	-15.4291	0.00019459	Intergenic	NA	NA
2	51194001	51195000	2.16717	0.359544	-8.80491	0.448526	13.5121	0.00287833	Gene Body	ENSSSCG00000029870	WNT3A
2	51597001	51598000	9.33259	0.0842591	17.3107	0.00506996	0.600035	0.895681	Intergenic	NA	NA
2	51670001	51671000	-5.79754	0.121024	-0.983581	0.88	-13.7924	0.00198986	Promoter	ENSSSCG00000032994	RNF187
2	51701001	51702000	8.46432	0.027972	-0.364176	0.920073	18.2297	0.00016434	Promoter	ENSSSCG00000045552
2	51732001	51733000	13.4366	0.0113244	5.50214	0.524464	23.2273	0.00549276	Promoter	ENSSSCG00000035985	TRIM11
2	51749001	51750000	-5.82204	0.010205	3.43049	0.790948	-11.5854	0.00093399	Intergenic	NA	NA
2	51914001	51915000	4.52394	0.165846	-4.33119	0.898169	11.6374	0.0465852	Intergenic	NA	NA
2	52288001	52289000	1.66812	0.141158	-4.4099	0.795139	12.5398	0.00162282	Promoter	ENSSSCG00000030672	ZNF692
2	52311001	52312000	11.168	3.26e-05	5.07157	0.318082	13.5986	4.14e-06	Promoter	ENSSSCG00000013978	ZNF672
2	52316001	52317000	5.35492	0.0430832	0.133488	0.908909	12.4158	0.00215478	Intergenic	NA	NA
2	52321001	52322000	-4.68474	0.675502	-10.5817	0.127763	12.8798	0.0352123	Promoter	ENSSSCG00000025900	SH3BP5L
2	52360001	52361000	-8.93925	0.00482847	-11.5147	0.00422893	-4.8865	0.520422	Intergenic	NA	NA
2	52656001	52657000	-4.89796	0.287664	4.18018	0.599413	-15.622	0.00170167	Gene Body	ENSSSCG00000032625
2	53245001	53246000	-4.01652	0.160499	3.83487	0.857052	-17.3714	0.00902633	Intergenic	NA	NA
2	54800001	54801000	5.56607	0.123397	0.515964	0.872438	10.5683	0.0223093	Intergenic	NA	NA
2	55022001	55023000	-8.83333	0.0104105	-7.65218	0.280694	-10.5065	0.0382192	Intergenic	NA	NA
2	55706001	55707000	-10.8201	0.0405377	-19.721	0.0129357	-6.34491	0.71642	Promoter	ENSSSCG00000027225
2	56259001	56260000	-10.2605	0.110103	-16.995	0.00998704	-3.57508	0.883458	Intergenic	NA	NA
2	56658001	56659000	-3.30446	0.752142	-11.655	0.0143882	4.66229	0.189255	Intergenic	NA	NA
2	56923001	56924000	2.52942	0.417723	-15.5492	0.269504	19.8511	0.00019013	Gene Body	ENSSSCG00000013940	NLRP3
2	57030001	57031000	-5.91718	0.203419	-0.060423	0.899801	-12.7583	0.026327	Intergenic	NA	NA
2	57036001	57037000	-8.7353	0.00231925	-17.7452	4.21e-05	-2.44918	0.690166	Intergenic	NA	NA
2	57266001	57267000	-3.48132	0.466892	-10.9013	0.00778326	5.20104	0.189848	Gene Body	ENSSSCG00000035650
2	57267001	57268000	7.08523	0.00466453	14.0348	0.00017302	-0.726542	0.779589	Gene Body	ENSSSCG00000035650
2	57848001	57849000	11.9163	1.46e-05	10.2794	0.0414396	13.6513	0.00107285	Promoter	ENSSSCG00000014539	ZFP62
2	58286001	58287000	8.64524	0.00881846	12.8344	0.0054744	3.99756	0.583401	Promoter	ENSSSCG00000013931	GMIP
2	58297001	58298000	-5.69594	0.0122075	-10.3405	0.00666757	-2.35941	0.50343	Promoter	ENSSSCG00000013932	LPAR2
2	58300001	58301000	-6.45208	0.242632	-2.51666	0.852154	-11.5785	0.0163951	Promoter	ENSSSCG00000013932	LPAR2
2	58367001	58368000	8.68056	0.0387064	2.55635	0.824139	17.6837	0.00222239	Intergenic	NA	NA
2	58375001	58376000	8.24198	0.0172344	16.1595	0.00386932	1.95933	0.657267	Intergenic	NA	NA
2	58388001	58389000	8.36339	0.00044701	-0.117349	0.595073	18.3152	4.93e-06	Gene Body	ENSSSCG00000013934	CILP2
2	58410001	58411000	-1.92517	0.629163	-10.4256	3.06e-07	8.59023	0.00087847	Promoter	ENSSSCG00000013937	TSSK6
2	58528001	58529000	-3.07326	0.29906	2.58291	0.827172	-14.2341	0.014359	Intergenic	NA	NA
2	58623001	58624000	6.78028	0.00359526	11.6663	0.00281748	3.09365	0.495835	Gene Body	ENSSSCG00000034887	HAPLN4
2	58658001	58659000	-3.85885	0.50499	8.67234	0.193205	-16.6235	0.00055232	Gene Body	ENSSSCG00000032131	NCAN
2	58698001	58699000	-9.1442	0.062061	-12.6754	0.0490983	-4.761	0.626439	Gene Body	ENSSSCG00000044084
2	58939001	58940000	10.2331	0.00379535	15.9641	0.0158363	5.32159	0.297643	Gene Body	ENSSSCG00000027840
2	59069001	59070000	12.9452	4.65e-05	9.70263	0.243853	15.6216	5e-05	Gene Body	ENSSSCG00000013915	CRTC1
2	59123001	59124000	-12.9346	0.0373522	-21.1437	0.0116739	-3.25	0.69843	Gene Body	ENSSSCG00000013915	CRTC1
2	59141001	59142000	-8.69815	0.243991	-0.576494	0.874592	-17.4755	0.00925218	Gene Body	ENSSSCG00000013915	CRTC1
2	59171001	59172000	-5.6038	0.0140944	-0.349248	0.695281	-10.0694	0.00094916	Promoter	ENSSSCG00000013913	KLHL26
2	59194001	59195000	16.9059	1.21e-05	8.52641	0.410844	24.3375	7.04e-06	Promoter	ENSSSCG00000013913	KLHL26
2	59223001	59224000	-9.14051	1.26e-06	-5.84501	0.199296	-13.3428	2.38e-07	Promoter	ENSSSCG00000013911	TMEM59L
2	59225001	59226000	16.0568	0.00128037	16.2443	0.0400391	16.1741	0.0724822	Promoter	ENSSSCG00000013911	TMEM59L
2	59368001	59369000	2.39248	0.340044	-11.1769	0.0855418	14.7515	0.00013634	Gene Body	ENSSSCG00000025955	SSBP4
2	59485001	59486000	8.2304	0.092605	3.16734	0.743325	14.5694	0.0227937	Promoter	ENSSSCG00000039684	PGPEP1
2	59530001	59531000	7.09996	0.0269063	0.733595	0.835088	10.8078	2.75e-05	Promoter	ENSSSCG00000031657
2	59587001	59588000	16.0739	8.47e-07	14.2415	0.0726359	20.0521	1.08e-05	Gene Body	ENSSSCG00000036363
2	59601001	59602000	1.18286	0.112183	-13.8069	0.864973	15.7106	0.00422441	Promoter	ENSSSCG00000013897	RAB3A
2	59610001	59611000	-15.1943	0.00147772	-23.946	0.00744689	-3.20204	0.271806	Gene Body	ENSSSCG00000013896	MPV17L2
2	59638001	59639000	-4.57229	0.194921	-14.0627	4.1e-05	4.91223	0.234635	Gene Body	ENSSSCG00000013900
2	59676001	59677000	-6.51723	0.185713	6.05542	0.503276	-24.2319	2.29e-05	Gene Body	ENSSSCG00000013895	MAST3
2	59695001	59696000	12.0081	0.034038	11.0432	0.1681	16.5019	0.227085	Promoter	ENSSSCG00000013895	MAST3
2	59699001	59700000	10.9549	2.64e-05	11.2881	0.0152823	10.1914	0.00801292	Promoter	ENSSSCG00000013895	MAST3
2	59736001	59737000	-11.5467	0.00086551	-16.0544	4.5e-05	-5.57678	0.656664	Gene Body	ENSSSCG00000013894	IL12RB1
2	59816001	59817000	-5.54256	0.0602235	-4.85727	0.792227	-13.5387	0.00123442	Promoter	ENSSSCG00000013892	KCNN1
2	59819001	59820000	-6.62566	0.0435907	-2.134	0.589671	-11.8731	0.0272913	Promoter	ENSSSCG00000013892	KCNN1
2	59832001	59833000	0.825946	0.858439	-12.2134	0.0160563	12.2443	0.0406518	Promoter	ENSSSCG00000013891	CCDC124
2	59872001	59873000	3.65256	0.708484	-3.98858	0.354443	13.0223	0.0314635	Gene Body	ENSSSCG00000013890	SLC5A5
2	59873001	59874000	4.51158	0.474649	-3.84409	0.620461	11.263	0.0462577	Gene Body	ENSSSCG00000013890	SLC5A5
2	59896001	59897000	6.06179	0.00027878	-1.1639	0.569475	17.4348	1.85e-12	Promoter	ENSSSCG00000013889
2	59957001	59958000	-7.42861	0.104657	-14.2458	0.000557	2.38813	0.559055	Intergenic	NA	NA
2	60066001	60067000	6.43486	0.191117	1.19935	0.861807	13.0959	0.0387354	Gene Body	ENSSSCG00000013880
2	60207001	60208000	-7.60217	0.0660571	-1.75234	0.795617	-14.3443	0.00586286	Gene Body	ENSSSCG00000013879	SLC27A1
2	60289001	60290000	-6.69553	0.237359	0.55457	0.820301	-18.0392	0.0198448	Intergenic	NA	NA
2	60354001	60355000	-5.17371	0.0371585	-11.6234	0.00107398	0.638476	0.882552	Promoter	ENSSSCG00000038440	GTPBP3
2	60453001	60454000	12.832	1.89e-05	11.0327	0.00307601	15.4114	0.0287656	Promoter	ENSSSCG00000013875	USE1
2	60581001	60582000	8.0288	0.00461724	11.6123	0.00034543	1.4241	0.903293	Gene Body	ENSSSCG00000036584	HAUS8
2	60736001	60737000	-10.2001	4.43e-09	-3.98208	0.0712471	-16.8509	4.15e-08	Intergenic	NA	NA
2	60962001	60963000	6.5483	0.10815	13.3227	0.00038037	-1.31597	0.806753	Promoter	ENSSSCG00000013865	NWD1
2	61217001	61218000	10.5095	0.00407726	9.54646	0.0583584	10.8948	0.129674	Gene Body	ENSSSCG00000013857	EPS15L1
2	61229001	61230000	5.92776	0.11138	-2.37973	0.690581	16.3606	0.0002764	Gene Body	ENSSSCG00000013857	EPS15L1
2	61231001	61232000	-6.5597	0.0915132	2.64605	0.829276	-18.1574	0.0138062	Gene Body	ENSSSCG00000013857	EPS15L1
2	61251001	61252000	-10.3123	0.0780821	-14.464	0.0118282	-5.02112	0.896764	Intergenic	NA	NA
2	61268001	61269000	-4.39298	0.32007	-10.7933	0.0186054	2.89195	0.663753	Intergenic	NA	NA
2	61269001	61270000	6.31514	0.00176924	3.43237	0.610975	11.8642	0.00012201	Intergenic	NA	NA
2	61321001	61322000	9.93742	0.0117198	12.4293	0.0413959	7.42018	0.292859	Intergenic	NA	NA
2	61332001	61333000	12.9364	0.0165318	7.99531	0.439012	16.7021	0.0306241	Intergenic	NA	NA
2	61985001	61986000	1.92739	0.249651	-9.375	0.60958	10.9091	0.0398373	Promoter	ENSSSCG00000027903
2	62338001	62339000	-5.3243	0.156237	-1.69826	0.911769	-10.0073	0.0426339	Promoter	ENSSSCG00000022227	BRD4
2	62349001	62350000	-6.10003	0.00021396	5.2414	0.687921	-15.9702	4.21e-11	Promoter	ENSSSCG00000028144	EPHX3
2	62354001	62355000	2.9349	0.610701	-7.0014	0.0601706	15.0935	0.00010988	Intergenic	NA	NA
2	64608001	64609000	-8.73531	0.0771971	1.62281	0.879082	-19.4853	0.00138031	Promoter	ENSSSCG00000013786	ZNF333
2	64712001	64713000	-7.03908	0.00151375	-0.997237	0.920529	-13.4831	3.5e-07	Intergenic	NA	NA
2	64715001	64716000	8.73934	0.0751255	12.9895	0.0306305	4.81104	0.70328	Intergenic	NA	NA
2	64718001	64719000	3.65203	0.194638	-5.98204	0.381234	18.2003	7.45e-07	Promoter	ENSSSCG00000013778	NDUFB7
2	64725001	64726000	-5.31116	0.0183414	-0.595626	0.374562	-16.6743	0.0252345	Promoter	ENSSSCG00000031299
2	64732001	64733000	7.11734	0.0221401	1.62556	0.659707	12.124	0.00508403	Promoter	ENSSSCG00000031299
2	64799001	64800000	-7.65497	0.0719901	-5.10546	0.631386	-10.0835	0.0293875	Promoter	ENSSSCG00000013782	PTGER1
2	64800001	64801000	-9.42928	0.00118538	-12.8382	0.00356956	-7.97331	0.301804	Gene Body	ENSSSCG00000013782	PTGER1
2	64891001	64892000	12.1594	3.07e-06	12.0351	0.0178116	14.6744	0.00091939	Promoter	ENSSSCG00000013775	ADGRE5
2	64982001	64983000	-9.72358	0.0441802	-5.44167	0.785487	-13.616	0.00454827	Intergenic	NA	NA
2	64993001	64994000	-3.80625	0.275386	-11.5741	0.0271327	1.63426	0.811904	Intergenic	NA	NA
2	65027001	65028000	10.9856	0.179317	2.14501	0.855298	21.3343	0.0369313	Gene Body	ENSSSCG00000013773	ADGRL1
2	65051001	65052000	-4.0814	0.19309	-0.475488	0.871239	-11.8644	0.00972718	Intergenic	NA	NA
2	65079001	65080000	10.9157	0.0431215	12.1084	0.0208807	12.3232	0.708703	Promoter	ENSSSCG00000013771	PRKACA
2	65110001	65111000	6.54062	0.0788647	3.2262	0.835395	10.4042	0.01452	Promoter	ENSSSCG00000013768
2	65115001	65116000	-5.16238	0.069713	2.50826	0.6985	-13.3316	0.00015293	Promoter	ENSSSCG00000013767	PALM3
2	65272001	65273000	8.39884	0.023616	6.68101	0.360573	11.8184	0.0472038	Gene Body	ENSSSCG00000013760
2	65302001	65303000	0.374673	0.642243	12.4076	0.00538065	-10.5405	0.169142	Intergenic	NA	NA
2	65305001	65306000	-16.0371	2.98e-05	-22.1239	0.00023215	-9.4031	0.170369	Intergenic	NA	NA
2	65659001	65660000	-6.38888	0.038455	-4.32523	0.657846	-10.3896	0.0294699	Gene Body	ENSSSCG00000047920
2	65863001	65864000	-14.5979	0.00400142	-14.0667	0.0540174	-9.7747	0.13009	Intergenic	NA	NA
2	65882001	65883000	13.2877	0.00878326	19.2996	0.00876403	5.46841	0.476843	Intergenic	NA	NA
2	65899001	65900000	13.7082	0.0010003	8.6289	0.160944	18.5736	0.0045593	Intergenic	NA	NA
2	66100001	66101000	-6.98925	0.363699	-0.286416	0.801162	-16.9076	0.0442069	Promoter	ENSSSCG00000013746	CALR
2	66118001	66119000	6.76971	0.189001	-5.56888	0.323941	14.3887	1.63e-05	Gene Body	ENSSSCG00000013745	FARSA
2	66154001	66155000	9.16601	0.0790508	1.98503	0.772128	15.3354	0.00011705	Gene Body	ENSSSCG00000013732	MAST1
2	66171001	66172000	13.4784	0.0003222	13.9638	0.073663	12.1712	0.011079	Gene Body	ENSSSCG00000013732	MAST1
2	66179001	66180000	6.65921	0.246043	0.523839	0.900607	15.3218	0.0164739	Gene Body	ENSSSCG00000013732	MAST1
2	66224001	66225000	1.34026	0.772451	-9.77718	0.00517022	18.057	4.3e-05	Gene Body	ENSSSCG00000013734	HOOK2
2	66253001	66254000	10.7198	0.0224518	4.82369	0.902901	19.3859	0.00175212	Gene Body	ENSSSCG00000038776	GET3
2	66270001	66271000	-8.24711	0.00260047	-13.1778	0.0344811	-6.58336	0.13475	Promoter	ENSSSCG00000013726	TNPO2
2	66371001	66372000	5.64933	0.27514	-2.4186	0.554655	15.1984	0.00116072	Intergenic	NA	NA
2	66420001	66421000	2.36678	0.411138	-11.178	0.0273712	16.5042	2.68e-07	Promoter	ENSSSCG00000029347	ZNF791
2	66432001	66433000	-3.63068	0.40046	3.10278	0.60941	-12.0962	0.0136388	Gene Body	ENSSSCG00000029347	ZNF791
2	66895001	66896000	-9.53626	0.0137525	-10.0526	0.0353291	-7.73329	0.437007	Intergenic	NA	NA
2	66965001	66966000	-5.17135	0.435271	-1.29358	0.748386	-12.7317	0.0476869	Gene Body	ENSSSCG00000045115
2	67163001	67164000	-7.62885	0.0242768	-10.9821	0.031995	-4.10031	0.472306	Intergenic	NA	NA
2	67773001	67774000	-4.313	0.214152	-0.545548	0.89732	-10.0333	0.025701	Intergenic	NA	NA
2	67789001	67790000	7.71903	0.134654	11.1097	0.0409566	1.30299	0.85553	Intergenic	NA	NA
2	68658001	68659000	1.27961	0.647943	-5.90994	0.407722	10.2104	0.0172553	Promoter	ENSSSCG00000044985
2	68796001	68797000	7.63807	0.0160518	12.0796	0.0226458	1.6495	0.487455	Gene Body	ENSSSCG00000027434	OLFM2
2	68806001	68807000	-2.42199	0.410421	6.33194	0.500403	-12.2567	0.00516984	Promoter	ENSSSCG00000027434	OLFM2
2	68834001	68835000	12.8158	0.00012229	8.38613	0.25329	17.2837	0.00015991	Gene Body	ENSSSCG00000013667	COL5A3
2	68835001	68836000	-8.4506	0.0169533	-1.66654	0.756438	-16.3567	0.0012878	Gene Body	ENSSSCG00000013667	COL5A3
2	68868001	68869000	-9.44693	0.00220832	-7.7983	0.295919	-14.6392	0.0023546	Promoter	ENSSSCG00000013667	COL5A3
2	69044001	69045000	-10.031	0.0160632	-15.6005	0.0237818	-6.13854	0.36576	Intergenic	NA	NA
2	69132001	69133000	4.04849	0.290032	11.0636	0.0316686	-1.71374	0.728463	Gene Body	ENSSSCG00000013650
2	69153001	69154000	-14.9351	4.01e-09	-13.9957	0.00022221	-16.9182	0.00021322	Intergenic	NA	NA
2	69184001	69185000	-6.87664	0.0760365	6.64356	0.852186	-14.0579	0.0352696	Promoter	ENSSSCG00000013648	TYK2
2	69194001	69195000	2.58441	0.573559	-4.43425	0.334043	10.222	0.0102481	Intergenic	NA	NA
2	69272001	69273000	-0.127273	0.709519	-6.22043	0.0472757	12.1926	0.00039317	Intergenic	NA	NA
2	69276001	69277000	8.37303	0.123721	11.5244	0.0210091	0.945946	0.90448	Gene Body	ENSSSCG00000023667	KEAP1
2	69294001	69295000	3.80519	0.631732	-6.24678	0.138944	16.8689	0.00085412	Promoter	ENSSSCG00000028460	S1PR5
2	69424001	69425000	-4.87865	0.25648	-0.189342	0.917858	-11.3435	0.0460275	Gene Body	ENSSSCG00000013638	ILF3
2	69448001	69449000	-4.48875	0.0723083	-10.2434	0.031688	0.87797	0.75123	Promoter	ENSSSCG00000013637	QTRT1
2	69598001	69599000	5.88795	0.174248	-0.396166	0.907619	10.3592	0.0316649	Gene Body	ENSSSCG00000013632	C19orf38
2	69727001	69728000	8.44109	0.00423169	2.42279	0.706234	16.8484	1.14e-05	Gene Body	ENSSSCG00000013629	SMARCA4
2	69836001	69837000	-7.96486	0.0194896	-4.75652	0.727629	-15.9785	0.00131752	Promoter	ENSSSCG00000028512	LDLR
2	69925001	69926000	7.06806	0.423011	17.979	0.00305089	-5.18245	0.354589	Promoter	ENSSSCG00000039194	KANK2
2	69971001	69972000	9.6093	0.0652981	3.25478	0.669677	14.7379	0.0118793	Promoter	ENSSSCG00000038604	DOCK6
2	70004001	70005000	0.657121	0.892777	-12.588	0.00674146	12.4317	0.0146941	Gene Body	ENSSSCG00000030693	TSPAN16
2	70006001	70007000	-12.2024	0.00158085	-6.18527	0.652114	-17.8951	7.48e-05	Gene Body	ENSSSCG00000030693	TSPAN16
2	70007001	70008000	3.40751	0.348204	11.0503	0.00319878	-5.6005	0.341984	Gene Body	ENSSSCG00000030693	TSPAN16
2	70188001	70189000	-3.48937	0.277979	1.85724	0.369193	-10.868	0.00089649	Gene Body	ENSSSCG00000013614	CNN1
2	70362001	70363000	7.83706	0.00080663	4.5539	0.608774	14.8024	1.11e-05	Promoter	ENSSSCG00000013717
2	70576001	70577000	6.53339	0.244422	1.0528	0.858267	14.0947	0.0271098	Intergenic	NA	NA
2	70670001	70671000	8.63085	0.0359002	13.5752	0.00492374	2.29745	0.824188	Intergenic	NA	NA
2	70691001	70692000	6.1417	0.12106	2.10706	0.804436	10.8214	0.0199396	Gene Body	ENSSSCG00000046561	LINC01862
2	70757001	70758000	-9.06917	0.074117	1.07611	0.851611	-17.9763	0.0112959	Gene Body	ENSSSCG00000013604	MYO1F
2	70804001	70805000	-9.1629	0.104128	-3.58607	0.816963	-16.149	0.0132878	Promoter	ENSSSCG00000024810	PRAM1
2	70808001	70809000	-15.6797	4.44e-07	-17.6223	0.00011475	-14.8043	0.0127385	Promoter	ENSSSCG00000024810	PRAM1
2	70884001	70885000	-9.40802	0.00726349	-4.72302	0.404713	-11.5638	0.00718751	Gene Body	ENSSSCG00000013600	RAB11B
2	70889001	70890000	12.3779	0.0212074	18.0088	0.0111281	6.89632	0.63341	Gene Body	ENSSSCG00000013600	RAB11B
2	70945001	70946000	9.4923	0.00032218	11.3852	6.45e-05	3.77538	0.538253	Gene Body	ENSSSCG00000013598	KANK3
2	71145001	71146000	-5.59826	0.0798934	-2.15359	0.708072	-10.4273	0.0465953	Gene Body	ENSSSCG00000013594	FBN3
2	71179001	71180000	5.44824	0.281303	0.0263516	0.90219	11.3954	0.0495084	Promoter	ENSSSCG00000013593
2	71180001	71181000	-13.1083	2.44e-05	-13.7731	0.00472294	-12.0333	0.0232345	Promoter	ENSSSCG00000013593
2	71206001	71207000	18.3037	2.05e-20	15.2762	0.00025889	26.5342	3.14e-16	Promoter	ENSSSCG00000013593
2	71325001	71326000	8.88158	0.0184007	12.1527	0.00276283	4.1545	0.757013	Promoter	ENSSSCG00000013584	PRR36
2	71361001	71362000	-5.41946	0.00083631	-2.59855	0.779805	-11.5178	1.86e-06	Promoter	ENSSSCG00000013585	EVI5L
2	71450001	71451000	-5.82199	0.112276	-2.28631	0.808792	-12.1117	0.0296741	Intergenic	NA	NA
2	71480001	71481000	-5.92193	0.0190208	-2.95762	0.635562	-10.7579	0.00382688	Gene Body	ENSSSCG00000037188	PCP2
2	71498001	71499000	-10.8977	0.0250812	-9.94731	0.369011	-11.4369	0.0666591	Gene Body	ENSSSCG00000037188	PCP2
2	71499001	71500000	-10.5672	0.0458525	-12.7597	0.00735307	-8.44958	0.867144	Gene Body	ENSSSCG00000037188	PCP2
2	71546001	71547000	12.1343	0.0365093	22.8382	0.00370949	2.77484	0.711282	Promoter	ENSSSCG00000013583	CAMSAP3
2	71612001	71613000	9.00393	0.0018122	2.29885	0.500258	17.801	0.00057218	Promoter	ENSSSCG00000013570	MCOLN1
2	71627001	71628000	-10.8655	0.00917171	-9.92069	0.23551	-12.1753	0.0489113	Gene Body	ENSSSCG00000013571	TEX45
2	71693001	71694000	-1.44958	0.740279	8.62991	0.223747	-11.6473	0.046681	Gene Body	ENSSSCG00000013568
2	71905001	71906000	-5.93577	0.0492621	-1.9819	0.825109	-12.9846	0.00401214	Gene Body	ENSSSCG00000013566	INSR
2	72321001	72322000	-7.06092	0.193846	-12.7353	0.0468373	1.15248	0.895148	Intergenic	NA	NA
2	72392001	72393000	4.26627	0.333505	13.6887	0.00597141	-4.67016	0.484684	Promoter	ENSSSCG00000013553	VAV1
2	72480001	72481000	-10.5807	0.0193498	-9.81651	0.0558215	-13.9884	0.388534	Promoter	ENSSSCG00000026695	TNFSF14
2	72528001	72529000	-9.84814	0.00881846	-14.2269	0.034316	-7.2067	0.271191	Promoter	ENSSSCG00000031115	CD70
2	72591001	72592000	-7.60446	0.147246	-15.4575	0.00169249	4.23149	0.527249	Intergenic	NA	NA
2	72600001	72601000	-16.6707	3.28e-05	-11.6358	0.110979	-23.5506	0.0002194	Promoter	ENSSSCG00000013545	TUBB4A
2	72780001	72781000	-4.16302	0.518431	-15.2452	0.00997486	6.07905	0.27298	Promoter	ENSSSCG00000013534	MLLT1
2	73039001	73040000	1.12313	0.908157	11.0145	0.0196966	-14.4671	0.0216964	Gene Body	ENSSSCG00000035403	RFX2
2	73110001	73111000	3.58207	0.764562	-1.57573	0.348442	12.2429	0.0323352	Gene Body	ENSSSCG00000013533	RANBP3
2	73139001	73140000	9.43882	0.0311131	16.9908	0.0164051	1.55269	0.791516	Gene Body	ENSSSCG00000013530
2	73158001	73159000	3.68041	0.669522	10.1908	0.0132475	-4.5788	0.424367	Gene Body	ENSSSCG00000013530
2	73179001	73180000	2.19356	0.184244	0.139194	0.791097	12.4764	0.00373895	Promoter	ENSSSCG00000040968
2	73218001	73219000	5.60631	0.170319	10.5306	0.0397976	-1.20136	0.89135	Gene Body	ENSSSCG00000013527	CATSPERD
2	73316001	73317000	-5.15638	0.0913505	-2.72894	0.769297	-11.2193	0.0343747	Gene Body	ENSSSCG00000013522	SAFB
2	73416001	73417000	5.26293	0.177989	0.0916325	0.852881	11.8777	0.0406777	Promoter	ENSSSCG00000049793
2	73593001	73594000	-7.3766	0.0796454	-2.72617	0.683787	-13.5958	0.0271115	Gene Body	ENSSSCG00000028612	PTPRS
2	73670001	73671000	-6.98298	0.00216873	-2.98077	0.547042	-11.3889	0.00166202	Gene Body	ENSSSCG00000028612	PTPRS
2	73673001	73674000	-4.14759	0.448193	-10.44	0.0160292	2.12495	0.481786	Gene Body	ENSSSCG00000028612	PTPRS
2	73890001	73891000	-0.941716	0.448227	-14.2962	0.00033867	4.57824	0.197752	Promoter	ENSSSCG00000024570	KDM4B
2	73937001	73938000	1.22519	0.354566	-9.99289	0.44946	17.3969	0.00153685	Promoter	ENSSSCG00000013517	UHRF1
2	73961001	73962000	11.8782	0.278567	16.8842	0.00694581	-3.18085	0.476794	Intergenic	NA	NA
2	74077001	74078000	15.3207	0.0216137	17.6715	0.10581	12.8714	0.260127	Intergenic	NA	NA
2	74088001	74089000	4.8199	0.158605	13.3215	0.00017626	-4.88818	0.390957	Intergenic	NA	NA
2	74152001	74153000	0.395862	0.78411	14.3971	0.00623935	-15.6739	0.0109131	Gene Body	ENSSSCG00000026063	DPP9
2	74220001	74221000	8.82094	5.1e-05	6.32513	0.131027	11.98	0.00046987	Promoter	ENSSSCG00000034615	TNFAIP8L1
2	74294001	74295000	-11.7785	1.58e-07	-15.3502	2.02e-06	-6.33639	0.0945292	Gene Body	ENSSSCG00000035176	SEMA6B
2	74364001	74365000	5.96146	0.114209	1.50987	0.848841	10.158	0.0238161	Gene Body	ENSSSCG00000013510	UBXN6
2	74417001	74418000	-8.3539	0.187413	-3.88014	0.874294	-11.1111	0.0390518	Gene Body	ENSSSCG00000013508	SH3GL1
2	74438001	74439000	-6.19036	0.199978	-14.4154	0.0198742	1.03552	0.853214	Gene Body	ENSSSCG00000013508	SH3GL1
2	74468001	74469000	-8.49908	0.00444955	-1.05244	0.897397	-17.5443	7.27e-06	Gene Body	ENSSSCG00000013506	STAP2
2	74494001	74495000	-9.98717	4.15e-07	-4.27775	0.408466	-17.6064	6.74e-09	Gene Body	ENSSSCG00000013504
2	74511001	74512000	-10.0897	2.87e-06	-5.9866	0.145702	-18.2924	9.24e-06	Gene Body	ENSSSCG00000013499	YJU2
2	74649001	74650000	-11.556	0.0176848	-3.56159	0.693443	-22.6418	0.00255994	Gene Body	ENSSSCG00000027127	MAP2K2
2	74686001	74687000	3.35635	0.0965638	-1.20618	0.887987	10.3427	0.022812	Promoter	ENSSSCG00000029236	ZBTB7A
2	74730001	74731000	9.87592	1.77e-06	12.9938	7.11e-05	5.50667	0.0685107	Promoter	ENSSSCG00000022066	PIAS4
2	74915001	74916000	-14.8762	0.0572465	-22.8524	0.00976184	-0.775856	0.896522	Gene Body	ENSSSCG00000013495	ZFR2
2	74965001	74966000	5.24115	0.33697	-0.881292	0.862228	14.4507	0.0428296	Gene Body	ENSSSCG00000013491	TJP3
2	75094001	75095000	6.91182	0.0169903	-0.689655	0.878693	10.7189	7.34e-05	Gene Body	ENSSSCG00000040421	HMG20B
2	75160001	75161000	-8.41168	0.12455	-16.638	0.00633654	1.22478	0.844638	Intergenic	NA	NA
2	75227001	75228000	-11.95	0.00487035	0.171311	0.83693	-28.1298	8.31e-05	Gene Body	ENSSSCG00000036537	NFIC
2	75232001	75233000	-5.37153	0.24236	1.25515	0.780651	-14.0428	0.0111635	Gene Body	ENSSSCG00000036537	NFIC
2	75241001	75242000	7.89836	0.580784	-11.6178	0.0329863	18.7999	0.00329381	Gene Body	ENSSSCG00000036537	NFIC
2	75277001	75278000	15.5449	1.83e-06	11.8448	0.00072359	30.2068	0.0155003	Gene Body	ENSSSCG00000036537	NFIC
2	75330001	75331000	7.77309	0.0253376	12.2621	0.0113413	2.7534	0.715801	Gene Body	ENSSSCG00000013476	CELF5
2	75350001	75351000	11.5187	0.0455635	6.47204	0.49725	15.4053	0.0645335	Gene Body	ENSSSCG00000013476	CELF5
2	75496001	75497000	-4.9057	0.0569977	-0.185711	0.708402	-11.0784	0.0333655	Gene Body	ENSSSCG00000032265	TLE5
2	75601001	75602000	-4.62264	0.310539	-10.1971	0.0376708	1.63029	0.72298	Promoter	ENSSSCG00000036792
2	75628001	75629000	1.61731	0.227221	-5.46439	0.876499	10.0079	0.0309313	Intergenic	NA	NA
2	75768001	75769000	6.64254	0.00917171	3.02215	0.662323	10.3037	4.96e-05	Promoter	ENSSSCG00000013471
2	75851001	75852000	11.0331	1.04e-05	6.92705	0.129756	12.8796	2.32e-05	Gene Body	ENSSSCG00000013468	THOP1
2	75930001	75931000	14.2566	0.00649961	19.7002	0.00277692	7.74633	0.539567	Promoter	ENSSSCG00000033949
2	75998001	75999000	1.90803	0.704924	12.0893	0.00189927	-11.243	0.0214299	Gene Body	ENSSSCG00000033949
2	76043001	76044000	7.43978	0.0721225	1.9539	0.795905	13.682	0.0167305	Gene Body	ENSSSCG00000033949
2	76049001	76050000	-1.78463	0.541486	7.7639	0.114627	-11.9353	0.0002232	Gene Body	ENSSSCG00000033949
2	76060001	76061000	5.43169	0.142234	-5.80244	0.249651	18.9039	5.34e-06	Gene Body	ENSSSCG00000033949
2	76082001	76083000	-4.17295	0.482622	9.6094	0.435366	-18.8947	0.0310613	Gene Body	ENSSSCG00000033949
2	76107001	76108000	-7.80192	0.27308	-17.7487	0.0082777	2.21233	0.674815	Gene Body	ENSSSCG00000022689	GADD45B
2	76108001	76109000	-10.9	0.0119195	-10.1488	0.0545912	-10.8008	0.292382	Gene Body	ENSSSCG00000022689	GADD45B
2	76111001	76112000	1.83129	0.256578	-2.63719	0.467615	10.2149	0.00066326	Promoter	ENSSSCG00000022689	GADD45B
2	76148001	76149000	0.700157	0.852961	-14.544	0.00089711	16.5561	7.48e-05	Promoter	ENSSSCG00000022757
2	76276001	76277000	1.48882	0.773467	-9.6347	0.0541905	21.5083	8.94e-06	Gene Body	ENSSSCG00000013462	LINGO3
2	76327001	76328000	8.09607	0.0083055	2.45758	0.605298	14.0281	0.00179329	Intergenic	NA	NA
2	76427001	76428000	1.99518	0.696998	-5.47852	0.38952	11.1251	0.039263	Promoter	ENSSSCG00000040157	AP3D1
2	76430001	76431000	9.63136	0.0512175	13.6688	0.0360317	4.92665	0.707646	Promoter	ENSSSCG00000040157	AP3D1
2	76472001	76473000	-7.99456	0.0869819	-11.2408	0.0456077	-0.89194	0.863503	Gene Body	ENSSSCG00000013455	IZUMO4
2	76480001	76481000	3.17411	0.680957	-7.36246	0.255672	12.9623	0.0122504	Gene Body	ENSSSCG00000032366	MOB3A
2	76483001	76484000	3.80066	0.691796	-4.91432	0.233381	12.7448	0.0173415	Gene Body	ENSSSCG00000032366	MOB3A
2	76622001	76623000	-8.68396	0.00671149	-15.0807	0.00099923	-2.51579	0.577	Gene Body	ENSSSCG00000013446	SCAMP4
2	76688001	76689000	-3.16514	0.828012	7.01149	0.00880293	-12.9475	0.00111749	Gene Body	ENSSSCG00000024672	KLF16
2	76975001	76976000	4.85138	0.282309	0.452972	0.86076	10.007	0.0366996	Gene Body	ENSSSCG00000013433	ADAMTSL5
2	76998001	76999000	3.3434	0.569404	-6.12586	0.187933	11.631	0.00213276	Promoter	ENSSSCG00000022265	C19orf25
2	77030001	77031000	-16.0751	0.00093681	-12.55	0.0126628	-16.7589	0.150772	Promoter	ENSSSCG00000023329	APC2
2	77043001	77044000	-9.36805	0.0251208	-5.5679	0.595976	-15.2012	0.0114584	Promoter	ENSSSCG00000033169	RPS15
2	77049001	77050000	6.30693	0.0723973	2.33133	0.729648	12.3454	0.0272886	Gene Body	ENSSSCG00000013427	DAZAP1
2	77115001	77116000	7.68546	0.119558	2.81304	0.808402	12.5036	0.0389371	Gene Body	ENSSSCG00000013427	DAZAP1
2	77178001	77179000	5.51652	0.110601	10.0758	0.00273045	-1.52266	0.702419	Promoter	ENSSSCG00000038701	EFNA2
2	77219001	77220000	2.81172	0.00610468	-0.025146	0.707839	10.4466	0.0003142	Promoter	ENSSSCG00000035532	ATP5F1D
2	77223001	77224000	14.629	2.11e-06	18.2675	0.00028653	11.8178	0.0209678	Promoter	ENSSSCG00000035532	ATP5F1D
2	77270001	77271000	-3.68386	0.0923579	-0.367338	0.906118	-12.4337	0.00327188	Intergenic	NA	NA
2	77272001	77273000	-2.1804	0.885194	6.39727	0.228651	-13.3143	0.0315652	Intergenic	NA	NA
2	77348001	77349000	-6.58369	0.133841	-16.0507	0.00167688	3.38193	0.748295	Gene Body	ENSSSCG00000027565
2	77354001	77355000	10.1814	0.00012711	5.68221	0.459598	15.5478	0.00010753	Promoter	ENSSSCG00000027565
2	77437001	77438000	7.21606	6.82e-06	13.8671	1.53e-07	1.51744	0.787394	Gene Body	ENSSSCG00000037642	ARID3A
2	77445001	77446000	4.60894	0.151486	-5.9166	0.872887	14.0354	0.0351386	Gene Body	ENSSSCG00000037642	ARID3A
2	77456001	77457000	7.18257	0.185381	-0.418938	0.91022	16.5964	0.0238044	Gene Body	ENSSSCG00000037642	ARID3A
2	77473001	77474000	3.67151	0.0515852	-1.34615	0.819412	10.856	0.00576166	Gene Body	ENSSSCG00000013420	KISS1R
2	77483001	77484000	-6.12215	0.158453	-1.4532	0.894569	-12.8486	0.0304067	Promoter	ENSSSCG00000013419	R3HDM4
2	77513001	77514000	-15.1237	0.00511746	-15.0636	0.012989	-9.47925	0.442611	Promoter	ENSSSCG00000013418	CFD
2	77528001	77529000	-1.80027	0.456995	-10.5143	0.001204	5.56176	0.200015	Intergenic	NA	NA
2	77530001	77531000	-14.5211	0.00053451	-12.7236	0.127857	-15.3213	0.0064468	Gene Body	ENSSSCG00000013415	AZU1
2	77533001	77534000	-6.75777	0.129372	8.75045	0.409615	-26.9075	1.49e-05	Promoter	ENSSSCG00000013415	AZU1
2	77537001	77538000	-4.00044	0.706033	5.87782	0.289346	-14.9687	0.0418471	Promoter	ENSSSCG00000037432	PLPPR3
2	77571001	77572000	-0.270831	0.7572	13.2022	0.045664	-13.2484	0.175463	Gene Body	ENSSSCG00000042865
2	77626001	77627000	5.9711	0.165469	-3.65307	0.625717	20.3644	3.91e-05	Gene Body	ENSSSCG00000039575	PALM
2	77657001	77658000	-2.99055	0.746091	8.90725	0.00655757	-17.7885	0.0280216	Gene Body	ENSSSCG00000037102	FSTL3
2	77736001	77737000	-16.5368	0.00026243	-18.7899	0.00451042	-16.3717	0.139853	Gene Body	ENSSSCG00000027907
2	77749001	77750000	-5.10906	0.206554	-1.0468	0.900287	-10.7721	0.0247848	Intergenic	NA	NA
2	77782001	77783000	7.70375	0.0137241	14.9224	0.00223253	0.7717	0.669184	Promoter	ENSSSCG00000036434	TPGS1
2	77788001	77789000	0.496999	0.893675	-9.83542	0.0854454	10.7155	0.0449057	Promoter	ENSSSCG00000039500
2	77860001	77861000	7.33796	0.0697606	-1.998	0.791275	16.1493	0.00056792	Intergenic	NA	NA
2	77946001	77947000	2.70226	0.108889	-2.65236	0.887117	13.1066	0.0186432	Promoter	ENSSSCG00000014004	PLPP2
2	77966001	77967000	2.30006	0.509836	-4.36685	0.599719	10.4357	0.0186432	Intergenic	NA	NA
2	77967001	77968000	2.80869	0.583631	-4.51149	0.436303	11.2647	0.0223032	Intergenic	NA	NA
2	77990001	77991000	-16.4857	1.38e-05	-12.5	0.0640323	-19.4329	0.00024555	Promoter	ENSSSCG00000051737
2	78076001	78077000	-6.48168	0.0567331	-11.9326	0.0219466	-2.91058	0.722037	Promoter	ENSSSCG00000014007	FLT4
2	78097001	78098000	-7.6254	0.155246	-3.52951	0.773743	-13.0137	0.042172	Gene Body	ENSSSCG00000014007	FLT4
2	78305001	78306000	-6.82756	0.102903	-2.83847	0.763281	-11.5874	0.0206831	Gene Body	ENSSSCG00000014012	GFPT2
2	78729001	78730000	14.8531	4.6e-07	10.2135	0.12001	25.9829	6.52e-07	Promoter	ENSSSCG00000014015
2	78731001	78732000	4.755	0.110906	0.384982	0.830711	10.0857	0.0251577	Promoter	ENSSSCG00000014015
2	78791001	78792000	-6.95652	0.0786727	-1.4126	0.825489	-15.4501	0.00211262	Gene Body	ENSSSCG00000014017	MGAT4B
2	78794001	78795000	-4.41096	0.284042	1.86003	0.795905	-11.1297	0.0189742	Gene Body	ENSSSCG00000014017	MGAT4B
2	78800001	78801000	-11.5355	0.00491867	-4.94487	0.603845	-17.6022	0.00054551	Promoter	ENSSSCG00000028488	LTC4S
2	78868001	78869000	-7.88528	0.00194935	-11.7462	0.00058703	-1.71701	0.538471	Gene Body	ENSSSCG00000014019	MAML1
2	79016001	79017000	2.18361	0.564972	-4.45017	0.118636	10.7705	7.34e-05	Promoter	ENSSSCG00000014023	RUFY1
2	79173001	79174000	-5.19592	0.0844598	3.19665	0.848617	-13.8447	0.0388514	Intergenic	NA	NA
2	79182001	79183000	-14.4284	1.4e-08	-18.6035	4.21e-08	-9.82685	0.149997	Promoter	ENSSSCG00000024043	ADAMTS2
2	79185001	79186000	-9.84396	0.00089756	-3.39063	0.289881	-14.9774	0.00320967	Gene Body	ENSSSCG00000024043	ADAMTS2
2	79298001	79299000	-13.1794	0.0003292	-11.5828	0.12769	-14.6022	0.00512025	Gene Body	ENSSSCG00000024043	ADAMTS2
2	79431001	79432000	11.0689	0.00106872	14.3543	0.00067459	6.60562	0.440822	Promoter	ENSSSCG00000021640	ZNF879
2	79601001	79602000	6.22639	0.0415268	-5.73544	0.532394	21.6939	8.21e-08	Promoter	ENSSSCG00000028295	ZNF354B
2	79812001	79813000	-6.13839	0.0221594	-10.5393	0.00269426	-1.41833	0.756047	Gene Body	ENSSSCG00000014029	COL23A1
2	80224001	80225000	0.38526	0.637289	-7.39063	0.455355	11.4573	0.0300957	Promoter	ENSSSCG00000039635
2	80360001	80361000	-4.23307	0.12864	-15.1244	0.0031351	7.30109	0.703349	Promoter	ENSSSCG00000014035	B4GALT7
2	80395001	80396000	9.74222	0.00062215	8.75975	0.0504312	11.7941	0.0320619	Promoter	ENSSSCG00000014038	FAM193B
2	80442001	80443000	-10.3708	0.0136445	-5.80965	0.518704	-14.6224	0.00339396	Promoter	ENSSSCG00000032642	DDX41
2	80471001	80472000	11.3061	0.0934995	5.68666	0.68456	17.7772	0.0415282	Gene Body	ENSSSCG00000040507	PDLIM7
2	80603001	80604000	-7.97208	0.0335266	-15.2548	3.94e-06	6.69406	0.0148129	Gene Body	ENSSSCG00000014040	LMAN2
2	80607001	80608000	9.87897	0.00118573	4.08971	0.566334	15.8342	0.00012568	Gene Body	ENSSSCG00000014040	LMAN2
2	80799001	80800000	-9.216	0.00043592	-6.56609	0.384139	-13.332	0.00053916	Gene Body	ENSSSCG00000014044	NSD1
2	80826001	80827000	-3.80333	0.517009	4.25385	0.406587	-14.91	0.00085636	Intergenic	NA	NA
2	80880001	80881000	-9.62811	0.0386925	-13.0195	0.0489065	-4.46905	0.554093	Gene Body	ENSSSCG00000014046	ZNF346
2	81191001	81192000	3.7134	0.179596	-1.02851	0.861433	10.4757	0.0109972	Gene Body	ENSSSCG00000043061
2	81206001	81207000	-5.41756	0.094255	-2.23736	0.704817	-10.9984	0.00572852	Gene Body	ENSSSCG00000043061
2	81642001	81643000	5.40471	0.0378251	-5.66592	0.43293	17.6414	8.72e-09	Promoter	ENSSSCG00000014061	THOC3
2	81765001	81766000	-14.2459	0.00233127	-16.5891	0.00542725	-9.23913	0.358338	Gene Body	ENSSSCG00000033682	CPLX2
2	81824001	81825000	2.69994	0.678581	-3.23034	0.553221	10.5665	0.0307965	Intergenic	NA	NA
2	81862001	81863000	5.87695	0.116668	11.9548	0.0188931	-0.142041	0.906388	Intergenic	NA	NA
2	81909001	81910000	8.04533	0.015354	7.80857	0.595828	15.4315	0.00688953	Gene Body	ENSSSCG00000029096	HRH2
2	81932001	81933000	13.6463	4.25e-08	15.3342	0.00070718	12.2973	0.00059227	Promoter	ENSSSCG00000029096	HRH2
2	82019001	82020000	-0.754469	0.842175	-9.92509	0.0399629	12.5694	0.00049639	Intergenic	NA	NA
2	82372001	82373000	2.69106	0.630006	-6.26002	0.46557	12.2365	0.038528	Intergenic	NA	NA
2	82457001	82458000	0.622834	0.706608	-7.17325	0.318571	19.0341	0.0103104	Intergenic	NA	NA
[truncated: 13,947 more rows]
