# Supplementary material for: Weaning Induces Stress-Dependent DNA Methylation and Transcriptional Changes in Piglet PBMCs
Source: Front Genet. 2021 Feb 5;12:633564. doi: 10.3389/fgene.2021.633564 (PMC7893110; doi:10.3389/fgene.2021.633564)
Supplement: Supplementary file 5 [file Table_3.XLSX]

## Sheet: Table S3
Table S3. Summary of Differential Methylation and Differential Expression Analyses
	Hypermethylated Regions	Hypomethylated Regions	Upregulated Genes	Downregulated Genes
Post- vs. Pre-weaning, all animals
Total	1363	1311	721	759
Promoter	504	288
Intragenic	500	646
Intergenic	359	377
Post- vs. Pre-weaning, HS animals
Total	4983	5007	49	13
Promoter	1769	796
Intragenic	1866	2486
Intergenic	1302	1725
Post- vs. Pre-weaning, LS animals
Total	2668	3473	134	42
Promoter	776	945
Intragenic	1108	1519
Intergenic	784	1009
