# Supplementary material for: Weaning Induces Stress-Dependent DNA Methylation and Transcriptional Changes in Piglet PBMCs
Source: Front Genet. 2021 Feb 5;12:633564. doi: 10.3389/fgene.2021.633564 (PMC7893110; doi:10.3389/fgene.2021.633564)
Supplement: Supplementary file 6 [file Table_4.XLSX]

## Sheet: TableS4A
Table S4A. GO Terms enriched among promoter hypomethylated genes in low stress group
GO Term	Description	P-value	FDR q-value	Enrichment	No. Genes	Genes
GO:0045639	positive regulation of myeloid cell differentiation	0.000212	1	3.15	13	[CTNNBIP1 - catenin, beta interacting protein 1, TRIB1 - tribbles homolog 1 (drosophila), GNAS - gnas complex locus, CCR1 - chemokine (c-c motif) receptor 1, ACVR1B - activin a receptor, type ib, INHBA - inhibin, beta a, CASP8 - caspase 8, apoptosis-related cysteine peptidase, FES - feline sarcoma oncogene, SLC9B2 - solute carrier family 9, subfamily b (nha2, cation proton antiporter 2), member 2…
GO:0002924	negative regulation of humoral immune response mediated by circulating immunoglobulin	0.000507	1	14.72	3	[PTPN6 - protein tyrosine phosphatase, non-receptor type 6, C4BPA - complement component 4 binding protein, alpha, FOXJ1 - forkhead box j1]
GO:0043123	positive regulation of I-kappaB kinase/NF-kappaB signaling	0.000673	1	2.34	18	[EEF1D - eukaryotic translation elongation factor 1 delta (guanine nucleotide exchange protein), NEK6 - nima-related kinase 6, BCL10 - b-cell cll/lymphoma 10, CCDC22 - coiled-coil domain containing 22, UNC5CL - unc-5 homolog c (c. elegans)-like, ABL1 - c-abl oncogene 1, non-receptor tyrosine kinase, CASP10 - caspase 10, apoptosis-related cysteine peptidase, IKBKE - inhibitor of kappa light polype…
GO:0002763	positive regulation of myeloid leukocyte differentiation	0.000975	1	3.46	9	[FES - feline sarcoma oncogene, CTNNBIP1 - catenin, beta interacting protein 1, CASP8 - caspase 8, apoptosis-related cysteine peptidase, TNFSF11 - tumor necrosis factor (ligand) superfamily, member 11, SLC9B2 - solute carrier family 9, subfamily b (nha2, cation proton antiporter 2), member 2, TRIB1 - tribbles homolog 1 (drosophila), GNAS - gnas complex locus, CCR1 - chemokine (c-c motif) receptor…
GO:0042105	alpha-beta T cell receptor complex	3.21e-05	0.0611	15.7	4	[PTPN6 - protein tyrosine phosphatase, non-receptor type 6, CD3E - cd3e molecule, epsilon (cd3-tcr complex), CD3G - cd3g molecule, gamma (cd3-tcr complex), CD3D - cd3d molecule, delta (cd3-tcr complex)]

## Sheet: TableS4B
Table S4B. GO Terms enriched among gene body hypermethylated genes in LS group
GO Term	Description	P-value	FDR q-value	Enrichment	No. Genes	Genes
GO:0032502	developmental process	1.42e-09	2.11e-05	1.32	312	[MAPKAP1 - mitogen-activated protein kinase associated protein 1, GFRA2 - gdnf family receptor alpha 2, CASZ1 - castor zinc finger 1, TRAK1 - trafficking protein, kinesin binding 1, RFX2 - regulatory factor x, 2 (influences hla class ii expression), SPOCK1 - sparc/osteonectin, cwcv and kazal-like domains proteoglycan (testican) 1, GRHL2 - grainyhead-like 2 (drosophila), BTD - biotinidase, LIN7A -…
GO:0048856	anatomical structure development	4.26e-09	3.16e-05	1.41	227	[MAPKAP1 - mitogen-activated protein kinase associated protein 1, CASZ1 - castor zinc finger 1, GFRA2 - gdnf family receptor alpha 2, RFX2 - regulatory factor x, 2 (influences hla class ii expression), SPOCK1 - sparc/osteonectin, cwcv and kazal-like domains proteoglycan (testican) 1, GRHL2 - grainyhead-like 2 (drosophila), BTD - biotinidase, LIN7A - lin-7 homolog a (c. elegans), RET - ret proto-o…
GO:0006928	movement of cell or subcellular component	6.37e-08	0.000315	1.66	109	[GFRA2 - gdnf family receptor alpha 2, IL16 - interleukin 16, TRAK1 - trafficking protein, kinesin binding 1, LRRC16A - leucine rich repeat containing 16a, SPOCK1 - sparc/osteonectin, cwcv and kazal-like domains proteoglycan (testican) 1, DOCK5 - dedicator of cytokinesis 5, GAB2 - grb2-associated binding protein 2, FLNA - filamin a, alpha, RET - ret proto-oncogene, APBA1 - amyloid beta (a4) precu…
GO:0032879	regulation of localization	1.09e-06	0.00404	1.38	185	[PARK2 - parkinson protein 2, e3 ubiquitin protein ligase (parkin), KCNAB2 - potassium voltage-gated channel, shaker-related subfamily, beta member 2, PNKD - paroxysmal nonkinesigenic dyskinesia, NCK1 - nck adaptor protein 1, IL16 - interleukin 16, INPP5K - inositol polyphosphate-5-phosphatase k, LRRC16A - leucine rich repeat containing 16a, PLXNC1 - plexin c1, ATP8A2 - atpase, aminophospholipid …
GO:0048870	cell motility	1.57e-06	0.00466	1.73	76	[IL16 - interleukin 16, LRRC16A - leucine rich repeat containing 16a, CATSPERD - catsper channel auxiliary subunit delta, SPOCK1 - sparc/osteonectin, cwcv and kazal-like domains proteoglycan (testican) 1, DOCK5 - dedicator of cytokinesis 5, CCDC40 - coiled-coil domain containing 40, FLNA - filamin a, alpha, SLC16A1 - solute carrier family 16 (monocarboxylate transporter), member 1, RET - ret prot…
GO:0072657	protein localization to membrane	1.75e-06	0.00432	2.1	45	[KCNIP4 - kv channel interacting protein 4, CACNG2 - calcium channel, voltage-dependent, gamma subunit 2, ARL3 - adp-ribosylation factor-like 3, FLOT1 - flotillin 1, MAL - mal, t-cell differentiation protein, NSF - n-ethylmaleimide-sensitive factor, FGF13 - fibroblast growth factor 13, SLC9A3R1 - solute carrier family 9, subfamily a (nhe3, cation proton antiporter 3), member 3 regulator 1, DLG2 -…
GO:0040011	locomotion	2.65e-06	0.0056	1.67	81	[IL16 - interleukin 16, LRRC16A - leucine rich repeat containing 16a, CATSPERD - catsper channel auxiliary subunit delta, SPOCK1 - sparc/osteonectin, cwcv and kazal-like domains proteoglycan (testican) 1, DOCK5 - dedicator of cytokinesis 5, CCDC40 - coiled-coil domain containing 40, FLNA - filamin a, alpha, SLC16A1 - solute carrier family 16 (monocarboxylate transporter), member 1, RET - ret prot…
GO:0120035	regulation of plasma membrane bounded cell projection organization	3.22e-06	0.00597	1.79	64	[RAB17 - rab17, member ras oncogene family, PARK2 - parkinson protein 2, e3 ubiquitin protein ligase (parkin), NCK1 - nck adaptor protein 1, CAMSAP2 - calmodulin regulated spectrin-associated protein family, member 2, LRRC7 - leucine rich repeat containing 7, CAMK1D - calcium/calmodulin-dependent protein kinase id, TRAK1 - trafficking protein, kinesin binding 1, LRRC16A - leucine rich repeat cont…
GO:0048731	system development	3.42e-06	0.00563	1.8	63	[PARK2 - parkinson protein 2, e3 ubiquitin protein ligase (parkin), MAL - mal, t-cell differentiation protein, ZNF423 - zinc finger protein 423, TCOF1 - treacher collins-franceschetti syndrome 1, GFRA2 - gdnf family receptor alpha 2, ARHGAP26 - rho gtpase activating protein 26, SPOCK1 - sparc/osteonectin, cwcv and kazal-like domains proteoglycan (testican) 1, POU6F2 - pou class 6 homeobox 2, ATN1…
GO:1990778	protein localization to cell periphery	3.77e-06	0.00558	2.51	29	[KCNIP4 - kv channel interacting protein 4, FLOT1 - flotillin 1, ARL3 - adp-ribosylation factor-like 3, MAL - mal, t-cell differentiation protein, FGF13 - fibroblast growth factor 13, NSF - n-ethylmaleimide-sensitive factor, SLC9A3R1 - solute carrier family 9, subfamily a (nhe3, cation proton antiporter 3), member 3 regulator 1, DLG2 - discs, large homolog 2 (drosophila), LRRC7 - leucine rich rep…
GO:0031344	regulation of cell projection organization	4.56e-06	0.00615	1.78	64	[RAB17 - rab17, member ras oncogene family, PARK2 - parkinson protein 2, e3 ubiquitin protein ligase (parkin), NCK1 - nck adaptor protein 1, CAMSAP2 - calmodulin regulated spectrin-associated protein family, member 2, LRRC7 - leucine rich repeat containing 7, CAMK1D - calcium/calmodulin-dependent protein kinase id, TRAK1 - trafficking protein, kinesin binding 1, LRRC16A - leucine rich repeat cont…
GO:0098609	cell-cell adhesion	7.95e-06	0.00982	1.98	45	[PKD1 - polycystic kidney disease 1 (autosomal dominant), ITGA5 - integrin, alpha 5 (fibronectin receptor, alpha polypeptide), CADM1 - cell adhesion molecule 1, DLG2 - discs, large homolog 2 (drosophila), LRRC7 - leucine rich repeat containing 7, KIFC3 - kinesin family member c3, GPC6 - glypican 6, IZUMO1 - izumo sperm-egg fusion 1, PTPRM - protein tyrosine phosphatase, receptor type, m, PTPRT - …
GO:0051049	regulation of transport	1.31e-05	0.0149	1.43	128	[PARK2 - parkinson protein 2, e3 ubiquitin protein ligase (parkin), KCNAB2 - potassium voltage-gated channel, shaker-related subfamily, beta member 2, PNKD - paroxysmal nonkinesigenic dyskinesia, IL16 - interleukin 16, INPP5K - inositol polyphosphate-5-phosphatase k, ATP8A2 - atpase, aminophospholipid transporter, class i, type 8a, member 2, GAB2 - grb2-associated binding protein 2, FLNA - filami…
GO:0016477	cell migration	1.37e-05	0.0145	1.69	67	[IL16 - interleukin 16, LRRC16A - leucine rich repeat containing 16a, SPOCK1 - sparc/osteonectin, cwcv and kazal-like domains proteoglycan (testican) 1, DOCK5 - dedicator of cytokinesis 5, FLNA - filamin a, alpha, SLC16A1 - solute carrier family 16 (monocarboxylate transporter), member 1, RET - ret proto-oncogene, MERTK - c-mer proto-oncogene tyrosine kinase, NOTCH1 - notch 1, SEMA3F - sema domai…
GO:0032237	activation of store-operated calcium channel activity	1.5e-05	0.0148	16.04	4	[STIM1 - stromal interaction molecule 1, EFCAB4B - ef-hand calcium binding domain 4b, PLCG2 - phospholipase c, gamma 2 (phosphatidylinositol-specific), STIM2 - stromal interaction molecule 2]
GO:0060372	regulation of atrial cardiac muscle cell membrane repolarization	1.5e-05	0.0139	16.04	4	[FLNA - filamin a, alpha, SCN5A - sodium channel, voltage-gated, type v, alpha subunit, KCNQ1 - potassium voltage-gated channel, kqt-like subfamily, member 1, CACNA1D - calcium channel, voltage-dependent, l type, alpha 1d subunit]
GO:0032148	activation of protein kinase B activity	1.62e-05	0.0142	5.55	9	[PDPK1 - 3-phosphoinositide dependent protein kinase-1, MAPKAP1 - mitogen-activated protein kinase associated protein 1, IL18 - interleukin 18 (interferon-gamma-inducing factor), AKT1 - v-akt murine thymoma viral oncogene homolog 1, PRR5 - proline rich 5 (renal), SRC - v-src avian sarcoma (schmidt-ruppin a-2) viral oncogene homolog, GAS6 - growth arrest-specific 6, NTRK3 - neurotrophic tyrosine k…
GO:0003008	system process	1.65e-05	0.0136	1.52	97	[PARK2 - parkinson protein 2, e3 ubiquitin protein ligase (parkin), AFF2 - af4/fmr2 family, member 2, KCNAB2 - potassium voltage-gated channel, shaker-related subfamily, beta member 2, PNKD - paroxysmal nonkinesigenic dyskinesia, INPP5K - inositol polyphosphate-5-phosphatase k, DDHD2 - ddhd domain containing 2, ATP8A2 - atpase, aminophospholipid transporter, class i, type 8a, member 2, POU6F2 - p…
GO:0010975	regulation of neuron projection development	1.8e-05	0.014	1.85	50	[PARK2 - parkinson protein 2, e3 ubiquitin protein ligase (parkin), RAB17 - rab17, member ras oncogene family, NCK1 - nck adaptor protein 1, CAMSAP2 - calmodulin regulated spectrin-associated protein family, member 2, LRRC7 - leucine rich repeat containing 7, CAMK1D - calcium/calmodulin-dependent protein kinase id, TRAK1 - trafficking protein, kinesin binding 1, PLXNC1 - plexin c1, SPOCK1 - sparc…
GO:0045785	positive regulation of cell adhesion	4.09e-05	0.0303	1.96	39	[ITGA5 - integrin, alpha 5 (fibronectin receptor, alpha polypeptide), FLOT1 - flotillin 1, ALOX15 - arachidonate 15-lipoxygenase, IL18 - interleukin 18 (interferon-gamma-inducing factor), NCK1 - nck adaptor protein 1, LRRC16A - leucine rich repeat containing 16a, UTRN - utrophin, NEDD9 - neural precursor cell expressed, developmentally down-regulated 9, DOCK5 - dedicator of cytokinesis 5, PDPK1 -…
GO:0072659	protein localization to plasma membrane	4.31e-05	0.0304	2.44	24	[RAB3C - rab3c, member ras oncogene family, SLMAP - sarcolemma associated protein, KCNIP4 - kv channel interacting protein 4, FLOT1 - flotillin 1, NSF - n-ethylmaleimide-sensitive factor, FGF13 - fibroblast growth factor 13, SLC9A3R1 - solute carrier family 9, subfamily a (nhe3, cation proton antiporter 3), member 3 regulator 1, MRAP2 - melanocortin 2 receptor accessory protein 2, LRRC7 - leucine…
GO:0060284	regulation of cell development	4.88e-05	0.0329	1.57	76	[RAB17 - rab17, member ras oncogene family, PARK2 - parkinson protein 2, e3 ubiquitin protein ligase (parkin), CAMSAP2 - calmodulin regulated spectrin-associated protein family, member 2, NCK1 - nck adaptor protein 1, CAMK1D - calcium/calmodulin-dependent protein kinase id, LRRC7 - leucine rich repeat containing 7, TRAK1 - trafficking protein, kinesin binding 1, LRRC16A - leucine rich repeat cont…
GO:0098742	cell-cell adhesion via plasma-membrane adhesion molecules	5.22e-05	0.0336	2.36	25	[ITGA5 - integrin, alpha 5 (fibronectin receptor, alpha polypeptide), CADM1 - cell adhesion molecule 1, PKD1 - polycystic kidney disease 1 (autosomal dominant), GPC6 - glypican 6, PTPRM - protein tyrosine phosphatase, receptor type, m, PTPRT - protein tyrosine phosphatase, receptor type, t, CDH23 - cadherin-related 23, RET - ret proto-oncogene, EFNA5 - ephrin-a5, ITGB2 - integrin, beta 2 (complem…
GO:0051239	regulation of multicellular organismal process	6.19e-05	0.0382	1.28	195	[OTUD5 - otu domain containing 5, NCK1 - nck adaptor protein 1, TRAK1 - trafficking protein, kinesin binding 1, SPOCK1 - sparc/osteonectin, cwcv and kazal-like domains proteoglycan (testican) 1, PLXNC1 - plexin c1, LINGO1 - leucine rich repeat and ig domain containing 1, GRHL2 - grainyhead-like 2 (drosophila), DOCK5 - dedicator of cytokinesis 5, SHANK2 - sh3 and multiple ankyrin repeat domains 2,…
GO:0034103	regulation of tissue remodeling	6.55e-05	0.0388	3.47	13	[VDR - vitamin d (1,25- dihydroxyvitamin d3) receptor, PPARGC1B - peroxisome proliferator-activated receptor gamma, coactivator 1 beta, CSF1R - colony stimulating factor 1 receptor, BGLAP - bone gamma-carboxyglutamate (gla) protein, IL18 - interleukin 18 (interferon-gamma-inducing factor), P2RX7 - purinergic receptor p2x, ligand-gated ion channel, 7, AGT - angiotensinogen (serpin peptidase inhibi…
GO:0048468	cell development	6.94e-05	0.0396	1.7	55	[SYN1 - synapsin i, NUP210L - nucleoporin 210kda-like, TCOF1 - treacher collins-franceschetti syndrome 1, RFX2 - regulatory factor x, 2 (influences hla class ii expression), ATP8A2 - atpase, aminophospholipid transporter, class i, type 8a, member 2, CDYL - chromodomain protein, y-like, PBX3 - pre-b-cell leukemia homeobox 3, KEL - kell blood group, metallo-endopeptidase, FLNA - filamin a, alpha, R…
GO:1901341	positive regulation of store-operated calcium channel activity	7.13e-05	0.0392	12.83	4	[EFCAB4B - ef-hand calcium binding domain 4b, STIM1 - stromal interaction molecule 1, STIM2 - stromal interaction molecule 2, PLCG2 - phospholipase c, gamma 2 (phosphatidylinositol-specific)]
GO:0050767	regulation of neurogenesis	7.51e-05	0.0398	1.6	68	[RAB17 - rab17, member ras oncogene family, PARK2 - parkinson protein 2, e3 ubiquitin protein ligase (parkin), CAMSAP2 - calmodulin regulated spectrin-associated protein family, member 2, NCK1 - nck adaptor protein 1, LRRC7 - leucine rich repeat containing 7, CAMK1D - calcium/calmodulin-dependent protein kinase id, TRAK1 - trafficking protein, kinesin binding 1, ATP8A2 - atpase, aminophospholipid…
GO:0048869	cellular developmental process	7.61e-05	0.0389	1.31	171	[TCOF1 - treacher collins-franceschetti syndrome 1, KCNAB2 - potassium voltage-gated channel, shaker-related subfamily, beta member 2, TRAK1 - trafficking protein, kinesin binding 1, RFX2 - regulatory factor x, 2 (influences hla class ii expression), ATP8A2 - atpase, aminophospholipid transporter, class i, type 8a, member 2, SPOCK1 - sparc/osteonectin, cwcv and kazal-like domains proteoglycan (te…
GO:0043269	regulation of ion transport	8.79e-05	0.0435	1.68	56	[KCNK5 - potassium channel, subfamily k, member 5, PARK2 - parkinson protein 2, e3 ubiquitin protein ligase (parkin), KCNAB2 - potassium voltage-gated channel, shaker-related subfamily, beta member 2, IL16 - interleukin 16, KCNQ4 - potassium voltage-gated channel, kqt-like subfamily, member 4, CAPN1 - calpain 1, (mu/i) large subunit, LRRC7 - leucine rich repeat containing 7, INPP5K - inositol pol…
GO:2001135	regulation of endocytic recycling	9.5e-05	0.0454	8.91	5	[SORL1 - sortilin-related receptor, l(dlr class) a repeats containing, RAB11B - rab11b, member ras oncogene family, EHD2 - eh-domain containing 2, EHD1 - eh-domain containing 1, INPP5F - inositol polyphosphate-5-phosphatase f]
GO:0051960	regulation of nervous system development	9.97e-05	0.0462	1.55	74	[RAB17 - rab17, member ras oncogene family, PARK2 - parkinson protein 2, e3 ubiquitin protein ligase (parkin), CAMSAP2 - calmodulin regulated spectrin-associated protein family, member 2, NCK1 - nck adaptor protein 1, LRRC7 - leucine rich repeat containing 7, CAMK1D - calcium/calmodulin-dependent protein kinase id, TRAK1 - trafficking protein, kinesin binding 1, ATP8A2 - atpase, aminophospholipid…
GO:0022610	biological adhesion	0.000106	0.0477	1.58	67	[LRRC7 - leucine rich repeat containing 7, KIFC3 - kinesin family member c3, SPOCK1 - sparc/osteonectin, cwcv and kazal-like domains proteoglycan (testican) 1, PLXNC1 - plexin c1, PTPRM - protein tyrosine phosphatase, receptor type, m, GRHL2 - grainyhead-like 2 (drosophila), PTPRT - protein tyrosine phosphatase, receptor type, t, FLNA - filamin a, alpha, ACE2 - angiotensin i converting enzyme 2, …
GO:0032501	multicellular organismal process	0.000118	0.0515	1.26	198	[CASZ1 - castor zinc finger 1, PHF21A - phd finger protein 21a, LRRC16A - leucine rich repeat containing 16a, GRHL2 - grainyhead-like 2 (drosophila), DOCK5 - dedicator of cytokinesis 5, SHANK2 - sh3 and multiple ankyrin repeat domains 2, RET - ret proto-oncogene, LRP11 - low density lipoprotein receptor-related protein 11, ASIC2 - acid-sensing (proton-gated) ion channel 2, ASIC1 - acid-sensing (p…
GO:0046850	regulation of bone remodeling	0.000128	0.0543	4.01	10	[CSF1R - colony stimulating factor 1 receptor, PPARGC1B - peroxisome proliferator-activated receptor gamma, coactivator 1 beta, BGLAP - bone gamma-carboxyglutamate (gla) protein, P2RX7 - purinergic receptor p2x, ligand-gated ion channel, 7, SIGLEC15 - sialic acid binding ig-like lectin 15, SRC - v-src avian sarcoma (schmidt-ruppin a-2) viral oncogene homolog, TNFAIP3 - tumor necrosis factor, alph…
GO:0031346	positive regulation of cell projection organization	0.000151	0.0621	1.86	38	[PARK2 - parkinson protein 2, e3 ubiquitin protein ligase (parkin), NCK1 - nck adaptor protein 1, RASAL1 - ras protein activator like 1 (gap1 like), LRRC7 - leucine rich repeat containing 7, ROR1 - receptor tyrosine kinase-like orphan receptor 1, CAMK1D - calcium/calmodulin-dependent protein kinase id, TRAK1 - trafficking protein, kinesin binding 1, LRRC16A - leucine rich repeat containing 16a, P…
GO:0045124	regulation of bone resorption	0.000173	0.0695	4.25	9	[CSF1R - colony stimulating factor 1 receptor, PPARGC1B - peroxisome proliferator-activated receptor gamma, coactivator 1 beta, BGLAP - bone gamma-carboxyglutamate (gla) protein, P2RX7 - purinergic receptor p2x, ligand-gated ion channel, 7, SIGLEC15 - sialic acid binding ig-like lectin 15, TNFAIP3 - tumor necrosis factor, alpha-induced protein 3, SRC - v-src avian sarcoma (schmidt-ruppin a-2) vir…
GO:0045664	regulation of neuron differentiation	0.000174	0.068	1.64	56	[PARK2 - parkinson protein 2, e3 ubiquitin protein ligase (parkin), RAB17 - rab17, member ras oncogene family, NCK1 - nck adaptor protein 1, CAMSAP2 - calmodulin regulated spectrin-associated protein family, member 2, LRRC7 - leucine rich repeat containing 7, CAMK1D - calcium/calmodulin-dependent protein kinase id, TRAK1 - trafficking protein, kinesin binding 1, PLXNC1 - plexin c1, SPOCK1 - sparc…
GO:0032271	regulation of protein polymerization	0.000184	0.0701	2.22	24	[PREX1 - phosphatidylinositol-3,4,5-trisphosphate-dependent rac exchange factor 1, ALOX15 - arachidonate 15-lipoxygenase, SNX9 - sorting nexin 9, TTBK1 - tau tubulin kinase 1, EML2 - echinoderm microtubule associated protein like 2, NCK1 - nck adaptor protein 1, CAMSAP2 - calmodulin regulated spectrin-associated protein family, member 2, CAPG - capping protein (actin filament), gelsolin-like, LMO…
GO:0051130	positive regulation of cellular component organization	0.000185	0.0684	1.45	91	[PARK2 - parkinson protein 2, e3 ubiquitin protein ligase (parkin), NCK1 - nck adaptor protein 1, PRDM7 - pr domain containing 7, CAMK1D - calcium/calmodulin-dependent protein kinase id, LRRC7 - leucine rich repeat containing 7, TRAK1 - trafficking protein, kinesin binding 1, LRRC16A - leucine rich repeat containing 16a, DDHD2 - ddhd domain containing 2, WHSC1L1 - wolf-hirschhorn syndrome candida…
GO:0007165	signal transduction	0.000211	0.0764	1.21	249	[MAPKAP1 - mitogen-activated protein kinase associated protein 1, GFRA2 - gdnf family receptor alpha 2, NCK1 - nck adaptor protein 1, PLXNC1 - plexin c1, LIFR - leukemia inhibitory factor receptor alpha, PDIA5 - protein disulfide isomerase family a, member 5, DOCK5 - dedicator of cytokinesis 5, LCP2 - lymphocyte cytosolic protein 2 (sh2 domain containing leukocyte protein of 76kda), CLEC12B - c-t…
GO:0010159	specification of animal organ position	0.000242	0.0853	16.04	3	[TBX3 - t-box 3, HOXA3 - homeobox a3, BMP4 - bone morphogenetic protein 4]
GO:0030001	metal ion transport	0.000252	0.0869	1.64	53	[KCNK5 - potassium channel, subfamily k, member 5, ATP2B2 - atpase, ca++ transporting, plasma membrane 2, TCN2 - transcobalamin ii, KCNAB2 - potassium voltage-gated channel, shaker-related subfamily, beta member 2, SLC39A13 - solute carrier family 39 (zinc transporter), member 13, KCNQ4 - potassium voltage-gated channel, kqt-like subfamily, member 4, SLC9A3 - solute carrier family 9, subfamily a …
GO:0043087	regulation of GTPase activity	0.000265	0.0892	1.77	41	[ARHGAP42 - rho gtpase activating protein 42, AGAP1 - arfgap with gtpase domain, ankyrin repeat and ph domain 1, SNX9 - sorting nexin 9, RASA3 - ras p21 protein activator 3, RASAL1 - ras protein activator like 1 (gap1 like), PTPRN2 - protein tyrosine phosphatase, receptor type, n polypeptide 2, ARHGAP26 - rho gtpase activating protein 26, NEDD9 - neural precursor cell expressed, developmentally d…
GO:0010770	positive regulation of cell morphogenesis involved in differentiation	0.000285	0.0939	2.36	20	[PREX1 - phosphatidylinositol-3,4,5-trisphosphate-dependent rac exchange factor 1, ROBO2 - roundabout, axon guidance receptor, homolog 2 (drosophila), CUX1 - cut-like homeobox 1, LPAR3 - lysophosphatidic acid receptor 3, TRAK1 - trafficking protein, kinesin binding 1, LRRC16A - leucine rich repeat containing 16a, WNT3 - wingless-type mmtv integration site family, member 3, NDEL1 - nude neurodevel…
GO:0050877	nervous system process	0.000304	0.098	1.55	63	[PARK2 - parkinson protein 2, e3 ubiquitin protein ligase (parkin), AFF2 - af4/fmr2 family, member 2, PNKD - paroxysmal nonkinesigenic dyskinesia, EML2 - echinoderm microtubule associated protein like 2, ATP2B2 - atpase, ca++ transporting, plasma membrane 2, KCNAB2 - potassium voltage-gated channel, shaker-related subfamily, beta member 2, KCNQ4 - potassium voltage-gated channel, kqt-like subfami…
GO:0007156	homophilic cell adhesion via plasma membrane adhesion molecules	0.000305	0.0963	2.65	16	[PKD1 - polycystic kidney disease 1 (autosomal dominant), CADM1 - cell adhesion molecule 1, ROBO2 - roundabout, axon guidance receptor, homolog 2 (drosophila), ESAM - endothelial cell adhesion molecule, CD84 - cd84 molecule, PTPRM - protein tyrosine phosphatase, receptor type, m, CDH22 - cadherin 22, type 2, PTPRT - protein tyrosine phosphatase, receptor type, t, IGSF21 - immunoglobin superfamily…
GO:0034762	regulation of transmembrane transport	0.000311	0.0961	1.69	46	[KCNK5 - potassium channel, subfamily k, member 5, KCNIP4 - kv channel interacting protein 4, CACNG2 - calcium channel, voltage-dependent, gamma subunit 2, STIM2 - stromal interaction molecule 2, KCNAB2 - potassium voltage-gated channel, shaker-related subfamily, beta member 2, SLC9A3R1 - solute carrier family 9, subfamily a (nhe3, cation proton antiporter 3), member 3 regulator 1, CAPN1 - calpai…
GO:0060627	regulation of vesicle-mediated transport	0.000333	0.101	1.7	45	[BTBD9 - btb (poz) domain containing 9, SYN1 - synapsin i, PARK2 - parkinson protein 2, e3 ubiquitin protein ligase (parkin), FLOT1 - flotillin 1, ALOX15 - arachidonate 15-lipoxygenase, NSF - n-ethylmaleimide-sensitive factor, CAMK1D - calcium/calmodulin-dependent protein kinase id, RAB26 - rab26, member ras oncogene family, PDPK1 - 3-phosphoinositide dependent protein kinase-1, GAB2 - grb2-assoc…
GO:0022604	regulation of cell morphogenesis	0.000339	0.1	1.71	44	[PARK2 - parkinson protein 2, e3 ubiquitin protein ligase (parkin), FGF13 - fibroblast growth factor 13, SLC9A3R1 - solute carrier family 9, subfamily a (nhe3, cation proton antiporter 3), member 3 regulator 1, RASAL1 - ras protein activator like 1 (gap1 like), TRAK1 - trafficking protein, kinesin binding 1, LRRC16A - leucine rich repeat containing 16a, NEDD9 - neural precursor cell expressed, de…
GO:0048679	regulation of axon regeneration	0.000362	0.105	4.88	7	[STK24 - serine/threonine kinase 24, GRN - granulin, NDEL1 - nude neurodevelopment protein 1-like 1, TNR - tenascin r, INPP5F - inositol polyphosphate-5-phosphatase f, NTRK3 - neurotrophic tyrosine kinase, receptor, type 3, PTPRF - protein tyrosine phosphatase, receptor type, f]
GO:0007417	central nervous system development	0.000397	0.113	2.5	17	[ASIC2 - acid-sensing (proton-gated) ion channel 2, PARK2 - parkinson protein 2, e3 ubiquitin protein ligase (parkin), ROBO2 - roundabout, axon guidance receptor, homolog 2 (drosophila), MAL - mal, t-cell differentiation protein, TRIO - trio rho guanine nucleotide exchange factor, HAPLN4 - hyaluronan and proteoglycan link protein 4, DNER - delta/notch-like egf repeat containing, ZIC3 - zic family…
GO:0051128	regulation of cellular component organization	0.00041	0.115	1.28	160	[PARK2 - parkinson protein 2, e3 ubiquitin protein ligase (parkin), NCK1 - nck adaptor protein 1, CAMSAP2 - calmodulin regulated spectrin-associated protein family, member 2, TRAK1 - trafficking protein, kinesin binding 1, INPP5K - inositol polyphosphate-5-phosphatase k, LRRC16A - leucine rich repeat containing 16a, WHSC1L1 - wolf-hirschhorn syndrome candidate 1-like 1, DDHD2 - ddhd domain contai…
GO:0051240	positive regulation of multicellular organismal process	0.000414	0.114	1.35	115	[PARK2 - parkinson protein 2, e3 ubiquitin protein ligase (parkin), IL18 - interleukin 18 (interferon-gamma-inducing factor), NCK1 - nck adaptor protein 1, TRAK1 - trafficking protein, kinesin binding 1, INPP5K - inositol polyphosphate-5-phosphatase k, ATP8A2 - atpase, aminophospholipid transporter, class i, type 8a, member 2, PLXNC1 - plexin c1, ATP11C - atpase, class vi, type 11c, DOCK5 - dedic…
GO:0010769	regulation of cell morphogenesis involved in differentiation	0.000438	0.118	1.9	31	[FGF13 - fibroblast growth factor 13, TRAK1 - trafficking protein, kinesin binding 1, LRRC16A - leucine rich repeat containing 16a, NEDD9 - neural precursor cell expressed, developmentally down-regulated 9, PLXNC1 - plexin c1, NTRK3 - neurotrophic tyrosine kinase, receptor, type 3, LINGO1 - leucine rich repeat and ig domain containing 1, DOCK5 - dedicator of cytokinesis 5, KEL - kell blood group,…
GO:0007155	cell adhesion	0.000438	0.116	1.53	64	[LRRC7 - leucine rich repeat containing 7, KIFC3 - kinesin family member c3, SPOCK1 - sparc/osteonectin, cwcv and kazal-like domains proteoglycan (testican) 1, PLXNC1 - plexin c1, PTPRM - protein tyrosine phosphatase, receptor type, m, GRHL2 - grainyhead-like 2 (drosophila), PTPRT - protein tyrosine phosphatase, receptor type, t, FLNA - filamin a, alpha, RET - ret proto-oncogene, APBA1 - amyloid …
GO:1901339	regulation of store-operated calcium channel activity	0.000451	0.117	9.16	4	[STIM1 - stromal interaction molecule 1, EFCAB4B - ef-hand calcium binding domain 4b, PLCG2 - phospholipase c, gamma 2 (phosphatidylinositol-specific), STIM2 - stromal interaction molecule 2]
GO:0010720	positive regulation of cell development	0.000455	0.116	1.65	47	[PARK2 - parkinson protein 2, e3 ubiquitin protein ligase (parkin), NCK1 - nck adaptor protein 1, RASAL1 - ras protein activator like 1 (gap1 like), ROR1 - receptor tyrosine kinase-like orphan receptor 1, CAMK1D - calcium/calmodulin-dependent protein kinase id, LRRC7 - leucine rich repeat containing 7, LRP2 - low density lipoprotein receptor-related protein 2, TRAK1 - trafficking protein, kinesin…
GO:0007166	cell surface receptor signaling pathway	0.000458	0.115	1.31	134	[TNFRSF9 - tumor necrosis factor receptor superfamily, member 9, IL18 - interleukin 18 (interferon-gamma-inducing factor), GFRA2 - gdnf family receptor alpha 2, NCK1 - nck adaptor protein 1, IL16 - interleukin 16, CIITA - class ii, major histocompatibility complex, transactivator, FNTA - farnesyltransferase, caax box, alpha, PLXNC1 - plexin c1, LIFR - leukemia inhibitory factor receptor alpha, GA…
GO:0034765	regulation of ion transmembrane transport	0.000464	0.115	1.73	40	[KCNK5 - potassium channel, subfamily k, member 5, KCNIP4 - kv channel interacting protein 4, CACNG2 - calcium channel, voltage-dependent, gamma subunit 2, STIM2 - stromal interaction molecule 2, KCNAB2 - potassium voltage-gated channel, shaker-related subfamily, beta member 2, SLC9A3R1 - solute carrier family 9, subfamily a (nhe3, cation proton antiporter 3), member 3 regulator 1, DLG2 - discs, …
GO:0007411	axon guidance	0.000493	0.12	1.99	27	[GFRA2 - gdnf family receptor alpha 2, KIF5C - kinesin family member 5c, DOK2 - docking protein 2, 56kda, PTPRM - protein tyrosine phosphatase, receptor type, m, GRB2 - growth factor receptor-bound protein 2, GAB2 - grb2-associated binding protein 2, RET - ret proto-oncogene, RAP1GAP - rap1 gtpase activating protein, EFNA5 - ephrin-a5, NCAM1 - neural cell adhesion molecule 1, TNR - tenascin r, SE…
GO:0030168	platelet activation	0.000498	0.119	2.74	14	[PIK3R6 - phosphoinositide-3-kinase, regulatory subunit 6, LCK - lymphocyte-specific protein tyrosine kinase, CD40LG - cd40 ligand, PDPK1 - 3-phosphoinositide dependent protein kinase-1, PTPN6 - protein tyrosine phosphatase, non-receptor type 6, FLNA - filamin a, alpha, PLCG2 - phospholipase c, gamma 2 (phosphatidylinositol-specific), LCP2 - lymphocyte cytosolic protein 2 (sh2 domain containing l…
GO:0010811	positive regulation of cell-substrate adhesion	0.000546	0.128	2.52	16	[ITGA5 - integrin, alpha 5 (fibronectin receptor, alpha polypeptide), PREX1 - phosphatidylinositol-3,4,5-trisphosphate-dependent rac exchange factor 1, ALOX15 - arachidonate 15-lipoxygenase, LRRC16A - leucine rich repeat containing 16a, UTRN - utrophin, DOCK1 - dedicator of cytokinesis 1, NEDD9 - neural precursor cell expressed, developmentally down-regulated 9, DOCK5 - dedicator of cytokinesis 5…
GO:0007605	sensory perception of sound	0.000549	0.127	2.43	17	[ASIC2 - acid-sensing (proton-gated) ion channel 2, SRRM4 - serine/arginine repetitive matrix 4, ATP2B2 - atpase, ca++ transporting, plasma membrane 2, EML2 - echinoderm microtubule associated protein like 2, SLC9A3R1 - solute carrier family 9, subfamily a (nhe3, cation proton antiporter 3), member 3 regulator 1, KCNQ4 - potassium voltage-gated channel, kqt-like subfamily, member 4, ROR1 - recept…
GO:0097485	neuron projection guidance	0.000611	0.139	1.96	27	[GFRA2 - gdnf family receptor alpha 2, KIF5C - kinesin family member 5c, DOK2 - docking protein 2, 56kda, PTPRM - protein tyrosine phosphatase, receptor type, m, GRB2 - growth factor receptor-bound protein 2, GAB2 - grb2-associated binding protein 2, RET - ret proto-oncogene, RAP1GAP - rap1 gtpase activating protein, EFNA5 - ephrin-a5, NCAM1 - neural cell adhesion molecule 1, TNR - tenascin r, SE…
GO:0051347	positive regulation of transferase activity	0.000678	0.152	1.58	52	[MAPKAP1 - mitogen-activated protein kinase associated protein 1, IL18 - interleukin 18 (interferon-gamma-inducing factor), GRHL2 - grainyhead-like 2 (drosophila), MAP2K4 - mitogen-activated protein kinase kinase 4, LCP2 - lymphocyte cytosolic protein 2 (sh2 domain containing leukocyte protein of 76kda), AGT - angiotensinogen (serpin peptidase inhibitor, clade a, member 8), RET - ret proto-oncoge…
GO:0065008	regulation of biological quality	0.00069	0.153	1.21	218	[NCK1 - nck adaptor protein 1, PHF21A - phd finger protein 21a, LRRC16A - leucine rich repeat containing 16a, PLXNC1 - plexin c1, PDIA5 - protein disulfide isomerase family a, member 5, DOCK5 - dedicator of cytokinesis 5, NCOR2 - nuclear receptor corepressor 2, LIN7A - lin-7 homolog a (c. elegans), SHANK2 - sh3 and multiple ankyrin repeat domains 2, RET - ret proto-oncogene, GCK - glucokinase (he…
GO:0055001	muscle cell development	0.000691	0.151	2.92	12	[NEBL - nebulette, KEL - kell blood group, metallo-endopeptidase, MYOM1 - myomesin 1, SMYD3 - set and mynd domain containing 3, TBX3 - t-box 3, SKI - v-ski avian sarcoma viral oncogene homolog, ATG5 - autophagy related 5, NFATC2 - nuclear factor of activated t-cells, cytoplasmic, calcineurin-dependent 2, MYH11 - myosin, heavy chain 11, smooth muscle, DNER - delta/notch-like egf repeat containing,…
GO:0050770	regulation of axonogenesis	0.000694	0.149	2.11	22	[IFRD1 - interferon-related developmental regulator 1, ROBO2 - roundabout, axon guidance receptor, homolog 2 (drosophila), FGF13 - fibroblast growth factor 13, LPAR3 - lysophosphatidic acid receptor 3, TRAK1 - trafficking protein, kinesin binding 1, WNT3 - wingless-type mmtv integration site family, member 3, NDEL1 - nude neurodevelopment protein 1-like 1, PLXNC1 - plexin c1, NTRK3 - neurotrophic…
GO:0010976	positive regulation of neuron projection development	0.000702	0.149	1.89	29	[PARK2 - parkinson protein 2, e3 ubiquitin protein ligase (parkin), NCK1 - nck adaptor protein 1, RASAL1 - ras protein activator like 1 (gap1 like), CAMK1D - calcium/calmodulin-dependent protein kinase id, ROR1 - receptor tyrosine kinase-like orphan receptor 1, LRRC7 - leucine rich repeat containing 7, TRAK1 - trafficking protein, kinesin binding 1, PLXNC1 - plexin c1, ATP8A2 - atpase, aminophosp…
GO:0045597	positive regulation of cell differentiation	0.000712	0.149	1.46	72	[PARK2 - parkinson protein 2, e3 ubiquitin protein ligase (parkin), IL18 - interleukin 18 (interferon-gamma-inducing factor), NCK1 - nck adaptor protein 1, CAMK1D - calcium/calmodulin-dependent protein kinase id, LRRC7 - leucine rich repeat containing 7, TRAK1 - trafficking protein, kinesin binding 1, LRRC16A - leucine rich repeat containing 16a, ATP8A2 - atpase, aminophospholipid transporter, cl…
GO:0030833	regulation of actin filament polymerization	0.000728	0.15	2.31	18	[PREX1 - phosphatidylinositol-3,4,5-trisphosphate-dependent rac exchange factor 1, ALOX15 - arachidonate 15-lipoxygenase, SNX9 - sorting nexin 9, NCK1 - nck adaptor protein 1, CAPG - capping protein (actin filament), gelsolin-like, LMOD1 - leiomodin 1 (smooth muscle), LRRC16A - leucine rich repeat containing 16a, ESAM - endothelial cell adhesion molecule, KANK3 - kn motif and ankyrin repeat domai…
GO:0032147	activation of protein kinase activity	0.000731	0.148	1.84	31	[STK24 - serine/threonine kinase 24, MAPKAP1 - mitogen-activated protein kinase associated protein 1, IL18 - interleukin 18 (interferon-gamma-inducing factor), FGF13 - fibroblast growth factor 13, TP73 - tumor protein p73, NTRK3 - neurotrophic tyrosine kinase, receptor, type 3, PDPK1 - 3-phosphoinositide dependent protein kinase-1, MAP2K4 - mitogen-activated protein kinase kinase 4, RET - ret pro…
GO:0043085	positive regulation of catalytic activity	0.000734	0.147	1.38	94	[MAPKAP1 - mitogen-activated protein kinase associated protein 1, AGAP1 - arfgap with gtpase domain, ankyrin repeat and ph domain 1, IL18 - interleukin 18 (interferon-gamma-inducing factor), FNTA - farnesyltransferase, caax box, alpha, ARHGAP26 - rho gtpase activating protein 26, RGS8 - regulator of g-protein signaling 8, GRHL2 - grainyhead-like 2 (drosophila), DOCK5 - dedicator of cytokinesis 5,…
GO:0014874	response to stimulus involved in regulation of muscle adaptation	0.000786	0.155	6.17	5	[HDAC4 - histone deacetylase 4, SGCA - sarcoglycan, alpha (50kda dystrophin-associated glycoprotein), AGT - angiotensinogen (serpin peptidase inhibitor, clade a, member 8), SCN5A - sodium channel, voltage-gated, type v, alpha subunit, UTRN - utrophin]
GO:0007399	nervous system development	0.000806	0.157	1.92	27	[SRRM4 - serine/arginine repetitive matrix 4, LSAMP - limbic system-associated membrane protein, ZNF423 - zinc finger protein 423, PHOX2A - paired-like homeobox 2a, GFRA2 - gdnf family receptor alpha 2, FGF13 - fibroblast growth factor 13, ROR1 - receptor tyrosine kinase-like orphan receptor 1, ATXN1 - ataxin 1, ARHGAP26 - rho gtpase activating protein 26, SPOCK1 - sparc/osteonectin, cwcv and kaz…
GO:0006897	endocytosis	0.000812	0.156	1.71	38	[CACNG2 - calcium channel, voltage-dependent, gamma subunit 2, ALOX15 - arachidonate 15-lipoxygenase, SNX9 - sorting nexin 9, USP20 - ubiquitin specific peptidase 20, LRP2 - low density lipoprotein receptor-related protein 2, LRRC16A - leucine rich repeat containing 16a, GRB2 - growth factor receptor-bound protein 2, SBSPON - somatomedin b and thrombospondin, type 1 domain containing, PACSIN2 - p…
GO:0070570	regulation of neuron projection regeneration	0.000825	0.157	4.32	7	[STK24 - serine/threonine kinase 24, GRN - granulin, NDEL1 - nude neurodevelopment protein 1-like 1, TNR - tenascin r, INPP5F - inositol polyphosphate-5-phosphatase f, NTRK3 - neurotrophic tyrosine kinase, receptor, type 3, PTPRF - protein tyrosine phosphatase, receptor type, f]
GO:0050954	sensory perception of mechanical stimulus	0.000827	0.155	2.35	17	[ASIC2 - acid-sensing (proton-gated) ion channel 2, SRRM4 - serine/arginine repetitive matrix 4, EML2 - echinoderm microtubule associated protein like 2, ATP2B2 - atpase, ca++ transporting, plasma membrane 2, SLC9A3R1 - solute carrier family 9, subfamily a (nhe3, cation proton antiporter 3), member 3 regulator 1, KCNQ4 - potassium voltage-gated channel, kqt-like subfamily, member 4, ROR1 - recept…
GO:0044406	adhesion of symbiont to host	0.000858	0.159	8.02	4	[SCARB1 - scavenger receptor class b, member 1, ACE2 - angiotensin i converting enzyme 2, GAS6 - growth arrest-specific 6, CD81 - cd81 molecule]
GO:1902339	positive regulation of apoptotic process involved in morphogenesis	0.000921	0.169	12.03	3	[VDR - vitamin d (1,25- dihydroxyvitamin d3) receptor, TNFRSF1B - tumor necrosis factor receptor superfamily, member 1b, NOTCH1 - notch 1]
GO:1904747	positive regulation of apoptotic process involved in development	0.000921	0.167	12.03	3	[VDR - vitamin d (1,25- dihydroxyvitamin d3) receptor, TNFRSF1B - tumor necrosis factor receptor superfamily, member 1b, NOTCH1 - notch 1]
GO:2001137	positive regulation of endocytic recycling	0.000921	0.165	12.03	3	[SORL1 - sortilin-related receptor, l(dlr class) a repeats containing, EHD1 - eh-domain containing 1, EHD2 - eh-domain containing 2]
GO:0046813	receptor-mediated virion attachment to host cell	0.000921	0.163	12.03	3	[ACE2 - angiotensin i converting enzyme 2, GAS6 - growth arrest-specific 6, CD81 - cd81 molecule]
GO:0034613	cellular protein localization	0.000956	0.167	1.44	73	[PARK2 - parkinson protein 2, e3 ubiquitin protein ligase (parkin), CC2D2A - coiled-coil and c2 domain containing 2a, WIPI1 - wd repeat domain, phosphoinositide interacting 1, MAL - mal, t-cell differentiation protein, FNTA - farnesyltransferase, caax box, alpha, LRRC7 - leucine rich repeat containing 7, INPP5K - inositol polyphosphate-5-phosphatase k, DPP6 - dipeptidyl-peptidase 6, LIN7C - lin-7…
GO:0050790	regulation of catalytic activity	0.000982	0.169	1.28	139	[PARK2 - parkinson protein 2, e3 ubiquitin protein ligase (parkin), AGAP1 - arfgap with gtpase domain, ankyrin repeat and ph domain 1, MAPKAP1 - mitogen-activated protein kinase associated protein 1, IL18 - interleukin 18 (interferon-gamma-inducing factor), NCK1 - nck adaptor protein 1, FNTA - farnesyltransferase, caax box, alpha, INPP5K - inositol polyphosphate-5-phosphatase k, PLXNC1 - plexin c…

## Sheet: TableS4C
Table S4C. GO Terms enriched among gene body hypomethylated genes in low stress group
GO Term	Description	P-value	FDR q-value	Enrichment	No. Genes	Genes
GO:0019899	enzyme binding	1.17e-07	0.000501	1.41	198	[BRCA1 - breast cancer 1, early onset, CBX1 - chromobox homolog 1, TRPC5 - transient receptor potential cation channel, subfamily c, member 5, ENSA - endosulfine alpha, IQGAP1 - iq motif containing gtpase activating protein 1, NCOR2 - nuclear receptor corepressor 2, BTG1 - b-cell translocation gene 1, anti-proliferative, DERL1 - derlin 1, IQSEC3 - iq motif and sec7 domain 3, KSR1 - kinase suppres…
GO:0044212	transcription regulatory region DNA binding	1.52e-07	0.000326	1.66	102	[PCGF5 - polycomb group ring finger 5, PARK2 - parkinson protein 2, e3 ubiquitin protein ligase (parkin), PAX2 - paired box 2, ZNF202 - zinc finger protein 202, KLF12 - kruppel-like factor 12, PAX5 - paired box 5, ELF4 - e74-like factor 4 (ets domain transcription factor), BRCA1 - breast cancer 1, early onset, ELK3 - elk3, ets-domain protein (srf accessory protein 2), TCF20 - transcription factor…
GO:0001067	regulatory region nucleic acid binding	1.62e-07	0.000232	1.66	102	[PCGF5 - polycomb group ring finger 5, PARK2 - parkinson protein 2, e3 ubiquitin protein ligase (parkin), ZNF202 - zinc finger protein 202, PAX2 - paired box 2, PAX5 - paired box 5, KLF12 - kruppel-like factor 12, ELF4 - e74-like factor 4 (ets domain transcription factor), BRCA1 - breast cancer 1, early onset, ELK3 - elk3, ets-domain protein (srf accessory protein 2), TCF20 - transcription factor…
GO:0000976	transcription regulatory region sequence-specific DNA binding	5.02e-07	0.000538	1.68	90	[PARK2 - parkinson protein 2, e3 ubiquitin protein ligase (parkin), PCGF5 - polycomb group ring finger 5, MEF2B - myocyte enhancer factor 2b, ZNF202 - zinc finger protein 202, PAX2 - paired box 2, NLRC5 - nlr family, card domain containing 5, KLF12 - kruppel-like factor 12, NKX2-5 - nk2 homeobox 5, PAX5 - paired box 5, IRF2BP1 - interferon regulatory factor 2 binding protein 1, ELF4 - e74-like fa…
GO:0001012	RNA polymerase II regulatory region DNA binding	8.85e-07	0.00076	1.68	86	[PCGF5 - polycomb group ring finger 5, MEF2B - myocyte enhancer factor 2b, ZNF202 - zinc finger protein 202, NLRC5 - nlr family, card domain containing 5, KLF12 - kruppel-like factor 12, PAX5 - paired box 5, NKX2-5 - nk2 homeobox 5, IRF2BP1 - interferon regulatory factor 2 binding protein 1, ELF4 - e74-like factor 4 (ets domain transcription factor), ARID5B - at rich interactive domain 5b (mrf1-l…
GO:1990837	sequence-specific double-stranded DNA binding	8.95e-07	0.00064	1.64	93	[PARK2 - parkinson protein 2, e3 ubiquitin protein ligase (parkin), PCGF5 - polycomb group ring finger 5, MEF2B - myocyte enhancer factor 2b, PAX2 - paired box 2, ZNF202 - zinc finger protein 202, NLRC5 - nlr family, card domain containing 5, NKX2-5 - nk2 homeobox 5, PAX5 - paired box 5, KLF12 - kruppel-like factor 12, IRF2BP1 - interferon regulatory factor 2 binding protein 1, ELF4 - e74-like fa…
GO:0003779	actin binding	1.03e-06	0.00063	1.97	54	[DST - dystonin, PARK2 - parkinson protein 2, e3 ubiquitin protein ligase (parkin), PDLIM5 - pdz and lim domain 5, MAEA - macrophage erythroblast attacher, SPTBN5 - spectrin, beta, non-erythrocytic 5, ABLIM1 - actin binding lim protein 1, MICAL3 - microtubule associated monooxygenase, calponin and lim domain containing 3, TRPC5 - transient receptor potential cation channel, subfamily c, member 5,…
GO:0000977	RNA polymerase II regulatory region sequence-specific DNA binding	1.2e-06	0.000646	1.68	85	[PCGF5 - polycomb group ring finger 5, MEF2B - myocyte enhancer factor 2b, ZNF202 - zinc finger protein 202, NLRC5 - nlr family, card domain containing 5, PAX5 - paired box 5, KLF12 - kruppel-like factor 12, NKX2-5 - nk2 homeobox 5, IRF2BP1 - interferon regulatory factor 2 binding protein 1, ELF4 - e74-like factor 4 (ets domain transcription factor), ARID5B - at rich interactive domain 5b (mrf1-l…
GO:0005085	guanyl-nucleotide exchange factor activity	1.27e-06	0.000606	2.4	34	[ARHGEF28 - rho guanine nucleotide exchange factor (gef) 28, MCF2L - mcf.2 cell line derived transforming sequence-like, DENND3 - denn/madd domain containing 3, DOCK9 - dedicator of cytokinesis 9, DOCK4 - dedicator of cytokinesis 4, DENND5A - denn/madd domain containing 5a, RASGEF1B - rasgef domain family, member 1b, TIAM2 - t-cell lymphoma invasion and metastasis 2, RGL1 - ral guanine nucleotide…
GO:0003690	double-stranded DNA binding	1.94e-06	0.000834	1.59	98	[PCGF5 - polycomb group ring finger 5, PARK2 - parkinson protein 2, e3 ubiquitin protein ligase (parkin), ZNF202 - zinc finger protein 202, PAX2 - paired box 2, PAX5 - paired box 5, KLF12 - kruppel-like factor 12, ELF4 - e74-like factor 4 (ets domain transcription factor), FBXO18 - f-box protein, helicase, 18, ELK3 - elk3, ets-domain protein (srf accessory protein 2), PBX3 - pre-b-cell leukemia h…
GO:0051020	GTPase binding	2.02e-06	0.00079	1.81	64	[ARHGEF28 - rho guanine nucleotide exchange factor (gef) 28, MCF2L - mcf.2 cell line derived transforming sequence-like, DENND3 - denn/madd domain containing 3, DOCK4 - dedicator of cytokinesis 4, MICAL3 - microtubule associated monooxygenase, calponin and lim domain containing 3, DENND5A - denn/madd domain containing 5a, IQGAP1 - iq motif containing gtpase activating protein 1, CYTH3 - cytohesin…
GO:0008092	cytoskeletal protein binding	4.56e-06	0.00163	1.56	99	[PARK2 - parkinson protein 2, e3 ubiquitin protein ligase (parkin), DST - dystonin, PDLIM5 - pdz and lim domain 5, MAEA - macrophage erythroblast attacher, SPTBN5 - spectrin, beta, non-erythrocytic 5, ABLIM1 - actin binding lim protein 1, BRCA1 - breast cancer 1, early onset, TRPC5 - transient receptor potential cation channel, subfamily c, member 5, STMN3 - stathmin-like 3, FLNB - filamin b, bet…
GO:0019904	protein domain specific binding	8.13e-06	0.00268	1.66	74	[PARK2 - parkinson protein 2, e3 ubiquitin protein ligase (parkin), DDX6 - dead (asp-glu-ala-asp) box helicase 6, ATP2B2 - atpase, ca++ transporting, plasma membrane 2, SYK - spleen tyrosine kinase, DOCK4 - dedicator of cytokinesis 4, EHMT1 - euchromatic histone-lysine n-methyltransferase 1, STMN3 - stathmin-like 3, ATF4 - activating transcription factor 4, SHANK3 - sh3 and multiple ankyrin repea…
GO:0017016	Ras GTPase binding	8.41e-06	0.00258	1.86	52	[ARHGEF28 - rho guanine nucleotide exchange factor (gef) 28, MCF2L - mcf.2 cell line derived transforming sequence-like, DENND3 - denn/madd domain containing 3, DOCK4 - dedicator of cytokinesis 4, MICAL3 - microtubule associated monooxygenase, calponin and lim domain containing 3, DENND5A - denn/madd domain containing 5a, IQGAP1 - iq motif containing gtpase activating protein 1, TBC1D22A - tbc1 d…
GO:0000987	proximal promoter sequence-specific DNA binding	1.03e-05	0.00295	1.74	62	[MEF2B - myocyte enhancer factor 2b, ZNF202 - zinc finger protein 202, PAX2 - paired box 2, NLRC5 - nlr family, card domain containing 5, PAX5 - paired box 5, NKX2-5 - nk2 homeobox 5, ELF4 - e74-like factor 4 (ets domain transcription factor), ELK3 - elk3, ets-domain protein (srf accessory protein 2), FLI1 - fli-1 proto-oncogene, ets transcription factor, ATF4 - activating transcription factor 4,…
GO:0000978	RNA polymerase II proximal promoter sequence-specific DNA binding	1.46e-05	0.00391	1.74	60	[MEF2B - myocyte enhancer factor 2b, ZNF202 - zinc finger protein 202, NLRC5 - nlr family, card domain containing 5, PAX5 - paired box 5, NKX2-5 - nk2 homeobox 5, ELF4 - e74-like factor 4 (ets domain transcription factor), ELK3 - elk3, ets-domain protein (srf accessory protein 2), FLI1 - fli-1 proto-oncogene, ets transcription factor, ATF4 - activating transcription factor 4, CREB3L2 - camp respo…
GO:0005515	protein binding	2.16e-05	0.00544	1.08	755	[PCGF5 - polycomb group ring finger 5, ZNF341 - zinc finger protein 341, LGALS3BP - lectin, galactoside-binding, soluble, 3 binding protein, AGAP3 - arfgap with gtpase domain, ankyrin repeat and ph domain 3, PHF21A - phd finger protein 21a, SPTBN5 - spectrin, beta, non-erythrocytic 5, ABLIM1 - actin binding lim protein 1, CBX1 - chromobox homolog 1, FBXO18 - f-box protein, helicase, 18, LIF - leu…
atory factor 8, M1AP - meiosis 1 associated protein, KCNIP1 - kv channel interacting protein 1, NFYC - nuclear transcription factor y, gamma, NFKBIA - nuclear factor of kappa light polypeptide gene enhancer in b-cells inhibitor, alpha, LEPRE1 - leucine proline-enriched proteoglycan (leprecan) 1, AGO2 - argonaute risc catalytic component 2, JAZF1 - jazf zinc finger 1, NAAA - n-acylethanolamine aci…
GO:0031267	small GTPase binding	2.57e-05	0.00614	1.79	52	[ARHGEF28 - rho guanine nucleotide exchange factor (gef) 28, MCF2L - mcf.2 cell line derived transforming sequence-like, DENND3 - denn/madd domain containing 3, DOCK4 - dedicator of cytokinesis 4, MICAL3 - microtubule associated monooxygenase, calponin and lim domain containing 3, DENND5A - denn/madd domain containing 5a, IQGAP1 - iq motif containing gtpase activating protein 1, TBC1D22A - tbc1 d…
GO:0005088	Ras guanyl-nucleotide exchange factor activity	4.22e-05	0.00953	2.47	23	[ARHGEF28 - rho guanine nucleotide exchange factor (gef) 28, PREX1 - phosphatidylinositol-3,4,5-trisphosphate-dependent rac exchange factor 1, MCF2L - mcf.2 cell line derived transforming sequence-like, DENND3 - denn/madd domain containing 3, DENND2A - denn/madd domain containing 2a, RAPGEF3 - rap guanine nucleotide exchange factor (gef) 3, TRIO - trio rho guanine nucleotide exchange factor, ARHG…
GO:0019902	phosphatase binding	4.41e-05	0.00947	2.23	28	[SYK - spleen tyrosine kinase, PHACTR3 - phosphatase and actin regulator 3, SLC9A1 - solute carrier family 9, subfamily a (nhe1, cation proton antiporter 1), member 1, STAT1 - signal transducer and activator of transcription 1, 91kda, STAT3 - signal transducer and activator of transcription 3 (acute-phase response factor), ENSA - endosulfine alpha, RCAN3 - rcan family member 3, EGFR - epidermal g…
GO:0005102	signaling receptor binding	7.53e-05	0.0154	1.39	123	[LRIG2 - leucine-rich repeats and immunoglobulin-like domains 2, PARK2 - parkinson protein 2, e3 ubiquitin protein ligase (parkin), DST - dystonin, SEMA5B - sema domain, seven thrombospondin repeats (type 1 and type 1-like), transmembrane domain (tm) and short cytoplasmic domain, (semaphorin) 5b, SNX25 - sorting nexin 25, FLT3 - fms-related tyrosine kinase 3, UNC93B1 - unc-93 homolog b1 (c. elega…
GO:0001228	DNA-binding transcription activator activity, RNA polymerase II-specific	0.0001	0.0196	1.74	48	[MEF2B - myocyte enhancer factor 2b, BCL11B - b-cell cll/lymphoma 11b (zinc finger protein), STAT2 - signal transducer and activator of transcription 2, 113kda, NKX2-5 - nk2 homeobox 5, LITAF - lipopolysaccharide-induced tnf factor, STAT1 - signal transducer and activator of transcription 1, 91kda, PAX5 - paired box 5, IRF2BP1 - interferon regulatory factor 2 binding protein 1, ELF4 - e74-like fa…
GO:0005509	calcium ion binding	0.000135	0.0252	1.57	66	[DST - dystonin, F10 - coagulation factor x, CRB1 - crumbs homolog 1 (drosophila), SPOCK1 - sparc/osteonectin, cwcv and kazal-like domains proteoglycan (testican) 1, CASQ2 - calsequestrin 2 (cardiac muscle), FSTL4 - follistatin-like 4, ASTN2 - astrotactin 2, SDF4 - stromal cell derived factor 4, IQGAP1 - iq motif containing gtpase activating protein 1, PLCB1 - phospholipase c, beta 1 (phosphoinos…
GO:0000981	DNA-binding transcription factor activity, RNA polymerase II-specific	0.000157	0.0281	1.44	94	[PARK2 - parkinson protein 2, e3 ubiquitin protein ligase (parkin), MEF2B - myocyte enhancer factor 2b, ZNF202 - zinc finger protein 202, PAX2 - paired box 2, PAX5 - paired box 5, KLF12 - kruppel-like factor 12, NKX2-5 - nk2 homeobox 5, ELF4 - e74-like factor 4 (ets domain transcription factor), IRF2BP1 - interferon regulatory factor 2 binding protein 1, ARID5B - at rich interactive domain 5b (mr…
GO:0005516	calmodulin binding	0.000196	0.0337	2.08	27	[KCNQ5 - potassium voltage-gated channel, kqt-like subfamily, member 5, ATP2B2 - atpase, ca++ transporting, plasma membrane 2, KCNQ4 - potassium voltage-gated channel, kqt-like subfamily, member 4, SLC9A1 - solute carrier family 9, subfamily a (nhe1, cation proton antiporter 1), member 1, PHKA2 - phosphorylase kinase, alpha 2 (liver), EGFR - epidermal growth factor receptor, MYH13 - myosin, heavy…
GO:0043565	sequence-specific DNA binding	0.000216	0.0357	1.41	101	[PCGF5 - polycomb group ring finger 5, PARK2 - parkinson protein 2, e3 ubiquitin protein ligase (parkin), PAX2 - paired box 2, ZNF202 - zinc finger protein 202, PAX5 - paired box 5, KLF12 - kruppel-like factor 12, ELF4 - e74-like factor 4 (ets domain transcription factor), ELK3 - elk3, ets-domain protein (srf accessory protein 2), CAMTA1 - calmodulin binding transcription activator 1, PBX3 - pre-…
GO:0022843	voltage-gated cation channel activity	0.000431	0.0685	2.21	21	[KCNK5 - potassium channel, subfamily k, member 5, GRIN2A - glutamate receptor, ionotropic, n-methyl d-aspartate 2a, KCNQ5 - potassium voltage-gated channel, kqt-like subfamily, member 5, TMC2 - transmembrane channel-like 2, KCNK1 - potassium channel, subfamily k, member 1, CACNB4 - calcium channel, voltage-dependent, beta 4 subunit, KCNJ16 - potassium inwardly-rectifying channel, subfamily j, me…
GO:0035259	glucocorticoid receptor binding	0.000456	0.0699	5.33	6	[NCOR2 - nuclear receptor corepressor 2, NR4A2 - nuclear receptor subfamily 4, group a, member 2, ETS2 - v-ets avian erythroblastosis virus e26 oncogene homolog 2, FLT3 - fms-related tyrosine kinase 3, SMAD3 - smad family member 3, STAT3 - signal transducer and activator of transcription 3 (acute-phase response factor)]
GO:1905576	ganglioside GT1b binding	0.000519	0.0768	12.43	3	[MAG - myelin associated glycoprotein, RTN4R - reticulon 4 receptor, PSAP - prosaposin]
GO:0017048	Rho GTPase binding	0.000529	0.0757	2.06	24	[ARHGEF28 - rho guanine nucleotide exchange factor (gef) 28, PREX1 - phosphatidylinositol-3,4,5-trisphosphate-dependent rac exchange factor 1, MCF2L - mcf.2 cell line derived transforming sequence-like, TRIO - trio rho guanine nucleotide exchange factor, ARHGEF4 - rho guanine nucleotide exchange factor (gef) 4, RHOH - ras homolog family member h, DOCK4 - dedicator of cytokinesis 4, DOCK11 - dedic…
GO:0042608	T cell receptor binding	0.000547	0.0757	8.29	4	[CD3E - cd3e molecule, epsilon (cd3-tcr complex), FYN - fyn oncogene related to src, fgr, yes, DOCK2 - dedicator of cytokinesis 2, EPS8L1 - eps8-like 1]
GO:0022832	voltage-gated channel activity	0.000569	0.0763	1.98	26	[KCNK5 - potassium channel, subfamily k, member 5, KCNIP4 - kv channel interacting protein 4, KCNQ5 - potassium voltage-gated channel, kqt-like subfamily, member 5, KCNQ4 - potassium voltage-gated channel, kqt-like subfamily, member 4, KCNG2 - potassium voltage-gated channel, subfamily g, member 2, NALCN - sodium leak channel, non-selective, KCNK9 - potassium channel, subfamily k, member 9, KCNQ2…
GO:0005244	voltage-gated ion channel activity	0.000569	0.0739	1.98	26	[KCNK5 - potassium channel, subfamily k, member 5, KCNIP4 - kv channel interacting protein 4, KCNQ5 - potassium voltage-gated channel, kqt-like subfamily, member 5, KCNQ4 - potassium voltage-gated channel, kqt-like subfamily, member 4, KCNG2 - potassium voltage-gated channel, subfamily g, member 2, NALCN - sodium leak channel, non-selective, KCNK9 - potassium channel, subfamily k, member 9, KCNQ2…
GO:0008134	transcription factor binding	0.000693	0.0875	1.49	65	[MEF2B - myocyte enhancer factor 2b, PAX2 - paired box 2, CXXC5 - cxxc finger protein 5, FLT3 - fms-related tyrosine kinase 3, CRTC3 - creb regulated transcription coactivator 3, NKX2-5 - nk2 homeobox 5, IRF2BP1 - interferon regulatory factor 2 binding protein 1, BRCA1 - breast cancer 1, early onset, ATF4 - activating transcription factor 4, NCOR2 - nuclear receptor corepressor 2, APBB2 - amyloid…
GO:0017124	SH3 domain binding	0.000706	0.0866	2.18	20	[PARK2 - parkinson protein 2, e3 ubiquitin protein ligase (parkin), CRK - v-crk avian sarcoma virus ct10 oncogene homolog, EVL - enah/vasp-like, DOCK4 - dedicator of cytokinesis 4, SH2D2A - sh2 domain containing 2a, LRP2 - low density lipoprotein receptor-related protein 2, SYNJ2 - synaptojanin 2, SYNGAP1 - synaptic ras gtpase activating protein 1, ADAM17 - adam metallopeptidase domain 17, INPP5D…
GO:0048365	Rac GTPase binding	0.000832	0.0993	2.81	12	[PKN1 - protein kinase n1, PREX1 - phosphatidylinositol-3,4,5-trisphosphate-dependent rac exchange factor 1, IQGAP1 - iq motif containing gtpase activating protein 1, ARHGEF4 - rho guanine nucleotide exchange factor (gef) 4, DOCK4 - dedicator of cytokinesis 4, RCC2 - regulator of chromosome condensation 2, FMNL1 - formin-like 1, FARP2 - ferm, rhogef and pleckstrin domain protein 2, DOCK2 - dedica…
GO:0001227	DNA-binding transcription repressor activity, RNA polymerase II-specific	0.000837	0.097	1.86	29	[PARK2 - parkinson protein 2, e3 ubiquitin protein ligase (parkin), ZNF202 - zinc finger protein 202, LRRFIP1 - leucine rich repeat (in flii) interacting protein 1, JARID2 - jumonji, at rich interactive domain 2, KLF12 - kruppel-like factor 12, ARID5B - at rich interactive domain 5b (mrf1-like), ELK3 - elk3, ets-domain protein (srf accessory protein 2), NFATC3 - nuclear factor of activated t-cell…
GO:0030695	GTPase regulator activity	0.000839	0.0947	1.76	34	[AGAP3 - arfgap with gtpase domain, ankyrin repeat and ph domain 3, RASA3 - ras p21 protein activator 3, RHOH - ras homolog family member h, DOCK4 - dedicator of cytokinesis 4, SIPA1L1 - signal-induced proliferation-associated 1 like 1, ARHGAP26 - rho gtpase activating protein 26, SLIT2 - slit homolog 2 (drosophila), RIMS1 - regulating synaptic membrane exocytosis 1, RASAL2 - ras protein activato…
GO:0019838	growth factor binding	0.000918	0.101	2.19	19	[FIBP - fibroblast growth factor (acidic) intracellular binding protein, IGF1R - insulin-like growth factor 1 receptor, FGFR1 - fibroblast growth factor receptor 1, IL2RA - interleukin 2 receptor, alpha, KLB - klotho beta, IGFBP2 - insulin-like growth factor binding protein 2, 36kda, LRP2 - low density lipoprotein receptor-related protein 2, HTRA1 - htra serine peptidase 1, IGF2R - insulin-like g…
GO:0140110	transcription regulator activity	0.000929	0.0997	1.29	132	[PARK2 - parkinson protein 2, e3 ubiquitin protein ligase (parkin), PCGF5 - polycomb group ring finger 5, ZNF341 - zinc finger protein 341, ZNF202 - zinc finger protein 202, PAX2 - paired box 2, KLF12 - kruppel-like factor 12, PAX5 - paired box 5, BRCA1 - breast cancer 1, early onset, ELF4 - e74-like factor 4 (ets domain transcription factor), WHSC1L1 - wolf-hirschhorn syndrome candidate 1-like 1…
GO:0032502	developmental process	3.23e-10	4.79e-06	1.29	393	[ABLIM1 - actin binding lim protein 1, LIF - leukemia inhibitory factor, SPOCK1 - sparc/osteonectin, cwcv and kazal-like domains proteoglycan (testican) 1, ZDHHC15 - zinc finger, dhhc-type containing 15, PMP22 - peripheral myelin protein 22, BRSK1 - br serine/threonine kinase 1, LMX1A - lim homeobox transcription factor 1, alpha, CHD7 - chromodomain helicase dna binding protein 7, MEGF11 - multip…
GO:0007165	signal transduction	1.21e-09	8.95e-06	1.31	348	[DST - dystonin, NCF4 - neutrophil cytosolic factor 4, 40kda, NCBP1 - nuclear cap binding protein subunit 1, 80kda, LGALS3BP - lectin, galactoside-binding, soluble, 3 binding protein, AGAP3 - arfgap with gtpase domain, ankyrin repeat and ph domain 3, CAB39L - calcium binding protein 39-like, UNC93B1 - unc-93 homolog b1 (c. elegans), SPTBN5 - spectrin, beta, non-erythrocytic 5, BRCA1 - breast canc…
GO:0120035	regulation of plasma membrane bounded cell projection organization	1.63e-09	8.04e-06	1.91	88	[LRIG2 - leucine-rich repeats and immunoglobulin-like domains 2, PARK2 - parkinson protein 2, e3 ubiquitin protein ligase (parkin), AP2A1 - adaptor-related protein complex 2, alpha 1 subunit, PDLIM5 - pdz and lim domain 5, PTPRS - protein tyrosine phosphatase, receptor type, s, DSCAM - down syndrome cell adhesion molecule, OLFM1 - olfactomedin 1, DENND5A - denn/madd domain containing 5a, ATP8A2 -…
GO:0031344	regulation of cell projection organization	2.75e-09	1.02e-05	1.89	88	[LRIG2 - leucine-rich repeats and immunoglobulin-like domains 2, PARK2 - parkinson protein 2, e3 ubiquitin protein ligase (parkin), AP2A1 - adaptor-related protein complex 2, alpha 1 subunit, PDLIM5 - pdz and lim domain 5, PTPRS - protein tyrosine phosphatase, receptor type, s, DSCAM - down syndrome cell adhesion molecule, OLFM1 - olfactomedin 1, DENND5A - denn/madd domain containing 5a, ATP8A2 -…
GO:0048522	positive regulation of cellular process	4.58e-09	1.36e-05	1.26	413	[ZNF341 - zinc finger protein 341, BMP2K - bmp2 inducible kinase, PCGF5 - polycomb group ring finger 5, LIF - leukemia inhibitory factor, FBXO18 - f-box protein, helicase, 18, LCP2 - lymphocyte cytosolic protein 2 (sh2 domain containing leukocyte protein of 76kda), LMAN2 - lectin, mannose-binding 2, MAML2 - mastermind-like 2 (drosophila), GCK - glucokinase (hexokinase 4), ZNF346 - zinc finger pro…
GO:0010975	regulation of neuron projection development	5e-09	1.24e-05	2.03	71	[LRIG2 - leucine-rich repeats and immunoglobulin-like domains 2, PARK2 - parkinson protein 2, e3 ubiquitin protein ligase (parkin), AP2A1 - adaptor-related protein complex 2, alpha 1 subunit, PDLIM5 - pdz and lim domain 5, PTPRS - protein tyrosine phosphatase, receptor type, s, DSCAM - down syndrome cell adhesion molecule, OLFM1 - olfactomedin 1, DENND5A - denn/madd domain containing 5a, ATP8A2 -…
GO:0045595	regulation of cell differentiation	8.02e-09	1.7e-05	1.51	174	[LRIG2 - leucine-rich repeats and immunoglobulin-like domains 2, PARK2 - parkinson protein 2, e3 ubiquitin protein ligase (parkin), PDLIM5 - pdz and lim domain 5, DDX6 - dead (asp-glu-ala-asp) box helicase 6, PAX2 - paired box 2, IL12RB1 - interleukin 12 receptor, beta 1, LIF - leukemia inhibitory factor, DENND5A - denn/madd domain containing 5a, PLXNC1 - plexin c1, SPOCK1 - sparc/osteonectin, cw…
GO:0048518	positive regulation of biological process	1.94e-08	3.59e-05	1.22	449	[PCGF5 - polycomb group ring finger 5, ZNF341 - zinc finger protein 341, BMP2K - bmp2 inducible kinase, LIF - leukemia inhibitory factor, FBXO18 - f-box protein, helicase, 18, NCOR2 - nuclear receptor corepressor 2, COL26A1 - collagen, type xxvi, alpha 1, LCP2 - lymphocyte cytosolic protein 2 (sh2 domain containing leukocyte protein of 76kda), LMAN2 - lectin, mannose-binding 2, MAML2 - mastermind…
GO:0045664	regulation of neuron differentiation	2.39e-08	3.93e-05	1.86	82	[LRIG2 - leucine-rich repeats and immunoglobulin-like domains 2, PARK2 - parkinson protein 2, e3 ubiquitin protein ligase (parkin), AP2A1 - adaptor-related protein complex 2, alpha 1 subunit, PDLIM5 - pdz and lim domain 5, DDX6 - dead (asp-glu-ala-asp) box helicase 6, NKX2-5 - nk2 homeobox 5, PTPRS - protein tyrosine phosphatase, receptor type, s, DSCAM - down syndrome cell adhesion molecule, OLF…
GO:0010646	regulation of cell communication	3.95e-08	5.85e-05	1.32	292	[BMP2K - bmp2 inducible kinase, BRCA1 - breast cancer 1, early onset, LIF - leukemia inhibitory factor, FBXO18 - f-box protein, helicase, 18, ENSA - endosulfine alpha, NCOR2 - nuclear receptor corepressor 2, IQGAP1 - iq motif containing gtpase activating protein 1, SHANK2 - sh3 and multiple ankyrin repeat domains 2, MAML2 - mastermind-like 2 (drosophila), GCK - glucokinase (hexokinase 4), IQSEC3 …
GO:0097485	neuron projection guidance	4.13e-08	5.57e-05	2.42	43	[BCL11B - b-cell cll/lymphoma 11b (zinc finger protein), SEMA5B - sema domain, seven thrombospondin repeats (type 1 and type 1-like), transmembrane domain (tm) and short cytoplasmic domain, (semaphorin) 5b, SPTBN5 - spectrin, beta, non-erythrocytic 5, DSCAM - down syndrome cell adhesion molecule, SLIT2 - slit homolog 2 (drosophila), GRB10 - growth factor receptor-bound protein 10, SEMA5A - sema d…
GO:0010769	regulation of cell morphogenesis involved in differentiation	4.93e-08	6.08e-05	2.28	48	[PDLIM5 - pdz and lim domain 5, CRK - v-crk avian sarcoma virus ct10 oncogene homolog, FGF13 - fibroblast growth factor 13, SIPA1L1 - signal-induced proliferation-associated 1 like 1, DSCAM - down syndrome cell adhesion molecule, PTPRS - protein tyrosine phosphatase, receptor type, s, SLIT2 - slit homolog 2 (drosophila), OLFM1 - olfactomedin 1, NEDD9 - neural precursor cell expressed, development…
GO:0023051	regulation of signaling	5.37e-08	6.12e-05	1.31	294	[BMP2K - bmp2 inducible kinase, BRCA1 - breast cancer 1, early onset, LIF - leukemia inhibitory factor, FBXO18 - f-box protein, helicase, 18, ENSA - endosulfine alpha, NCOR2 - nuclear receptor corepressor 2, IQGAP1 - iq motif containing gtpase activating protein 1, SHANK2 - sh3 and multiple ankyrin repeat domains 2, MAML2 - mastermind-like 2 (drosophila), GCK - glucokinase (hexokinase 4), IQSEC3 …
GO:0051239	regulation of multicellular organismal process	5.5e-08	5.82e-05	1.34	263	[BMP2K - bmp2 inducible kinase, OTUD5 - otu domain containing 5, BRCA1 - breast cancer 1, early onset, LIF - leukemia inhibitory factor, PLXNC1 - plexin c1, SPOCK1 - sparc/osteonectin, cwcv and kazal-like domains proteoglycan (testican) 1, TRPC5 - transient receptor potential cation channel, subfamily c, member 5, NRP2 - neuropilin 2, IQGAP1 - iq motif containing gtpase activating protein 1, TRPS…
GO:0022604	regulation of cell morphogenesis	1.02e-07	0.000101	1.96	65	[PARK2 - parkinson protein 2, e3 ubiquitin protein ligase (parkin), PDLIM5 - pdz and lim domain 5, PTPRS - protein tyrosine phosphatase, receptor type, s, DSCAM - down syndrome cell adhesion molecule, OLFM1 - olfactomedin 1, PLXNC1 - plexin c1, TRPC5 - transient receptor potential cation channel, subfamily c, member 5, FSTL4 - follistatin-like 4, SHANK3 - sh3 and multiple ankyrin repeat domains 3…
GO:0048869	cellular developmental process	2.22e-07	0.000206	1.36	229	[MAEA - macrophage erythroblast attacher, ELF4 - e74-like factor 4 (ets domain transcription factor), LIF - leukemia inhibitory factor, SPOCK1 - sparc/osteonectin, cwcv and kazal-like domains proteoglycan (testican) 1, ELK3 - elk3, ets-domain protein (srf accessory protein 2), TRPC5 - transient receptor potential cation channel, subfamily c, member 5, IQGAP1 - iq motif containing gtpase activatin…
GO:0007411	axon guidance	2.24e-07	0.000196	2.34	41	[BCL11B - b-cell cll/lymphoma 11b (zinc finger protein), SPTBN5 - spectrin, beta, non-erythrocytic 5, DSCAM - down syndrome cell adhesion molecule, SLIT2 - slit homolog 2 (drosophila), GRB10 - growth factor receptor-bound protein 10, NRP2 - neuropilin 2, GRB2 - growth factor receptor-bound protein 2, SHANK3 - sh3 and multiple ankyrin repeat domains 3, ENAH - enabled homolog (drosophila), GLI2 - g…
GO:0048856	anatomical structure development	2.34e-07	0.000193	1.31	272	[CASZ1 - castor zinc finger 1, MAEA - macrophage erythroblast attacher, BRCA1 - breast cancer 1, early onset, LIF - leukemia inhibitory factor, SPOCK1 - sparc/osteonectin, cwcv and kazal-like domains proteoglycan (testican) 1, HSD11B1 - hydroxysteroid (11-beta) dehydrogenase 1, TRPC5 - transient receptor potential cation channel, subfamily c, member 5, NRP2 - neuropilin 2, IQGAP1 - iq motif conta…
GO:0050767	regulation of neurogenesis	2.42e-07	0.000189	1.69	93	[LRIG2 - leucine-rich repeats and immunoglobulin-like domains 2, PARK2 - parkinson protein 2, e3 ubiquitin protein ligase (parkin), AP2A1 - adaptor-related protein complex 2, alpha 1 subunit, PDLIM5 - pdz and lim domain 5, DDX6 - dead (asp-glu-ala-asp) box helicase 6, NKX2-5 - nk2 homeobox 5, PTPRS - protein tyrosine phosphatase, receptor type, s, DSCAM - down syndrome cell adhesion molecule, OLF…
GO:0060284	regulation of cell development	3.48e-07	0.000258	1.63	102	[PARK2 - parkinson protein 2, e3 ubiquitin protein ligase (parkin), LRIG2 - leucine-rich repeats and immunoglobulin-like domains 2, PDLIM5 - pdz and lim domain 5, DDX6 - dead (asp-glu-ala-asp) box helicase 6, LIF - leukemia inhibitory factor, SPOCK1 - sparc/osteonectin, cwcv and kazal-like domains proteoglycan (testican) 1, ATP8A2 - atpase, aminophospholipid transporter, class i, type 8a, member …
GO:0051960	regulation of nervous system development	3.66e-07	0.000258	1.64	101	[PARK2 - parkinson protein 2, e3 ubiquitin protein ligase (parkin), LRIG2 - leucine-rich repeats and immunoglobulin-like domains 2, DDX6 - dead (asp-glu-ala-asp) box helicase 6, PDLIM5 - pdz and lim domain 5, PAX2 - paired box 2, LIF - leukemia inhibitory factor, PLXNC1 - plexin c1, ATP8A2 - atpase, aminophospholipid transporter, class i, type 8a, member 2, SPOCK1 - sparc/osteonectin, cwcv and ka…
GO:0065007	biological regulation	4.27e-07	0.000288	1.1	747	[PCGF5 - polycomb group ring finger 5, BMP2K - bmp2 inducible kinase, ZNF341 - zinc finger protein 341, C9orf3 - chromosome 9 open reading frame 3, OTUD5 - otu domain containing 5, LGALS3BP - lectin, galactoside-binding, soluble, 3 binding protein, AGAP3 - arfgap with gtpase domain, ankyrin repeat and ph domain 3, PHF21A - phd finger protein 21a, SPTBN5 - spectrin, beta, non-erythrocytic 5, CBX1 …
ells inhibitor, alpha, LEPRE1 - leucine proline-enriched proteoglycan (leprecan) 1, AGO2 - argonaute risc catalytic component 2, JAZF1 - jazf zinc finger 1, NAAA - n-acylethanolamine acid amidase, CPLX2 - complexin 2, FRMPD4 - ferm and pdz domain containing 4, FOXP2 - forkhead box p2, ZNF536 - zinc finger protein 536, SDCCAG8 - serologically defined colon cancer antigen 8, DAGLB - diacylglycerol …
GO:0007166	cell surface receptor signaling pathway	4.55e-07	0.000293	1.4	185	[NCF4 - neutrophil cytosolic factor 4, 40kda, DST - dystonin, NCBP1 - nuclear cap binding protein subunit 1, 80kda, FLT3 - fms-related tyrosine kinase 3, IL12RB1 - interleukin 12 receptor, beta 1, IL13RA1 - interleukin 13 receptor, alpha 1, MIF - macrophage migration inhibitory factor (glycosylation-inhibiting factor), LIF - leukemia inhibitory factor, PLXNC1 - plexin c1, INHBA - inhibin, beta a,…
GO:0045597	positive regulation of cell differentiation	5.09e-07	0.000314	1.62	103	[PARK2 - parkinson protein 2, e3 ubiquitin protein ligase (parkin), PAX2 - paired box 2, IL12RB1 - interleukin 12 receptor, beta 1, LIF - leukemia inhibitory factor, ATP8A2 - atpase, aminophospholipid transporter, class i, type 8a, member 2, PLXNC1 - plexin c1, TRPC5 - transient receptor potential cation channel, subfamily c, member 5, INHBA - inhibin, beta a, IQGAP1 - iq motif containing gtpase …
GO:0050793	regulation of developmental process	6.06e-07	0.000359	1.35	220	[BMP2K - bmp2 inducible kinase, BRCA1 - breast cancer 1, early onset, LIF - leukemia inhibitory factor, SPOCK1 - sparc/osteonectin, cwcv and kazal-like domains proteoglycan (testican) 1, PLXNC1 - plexin c1, TRPC5 - transient receptor potential cation channel, subfamily c, member 5, IQGAP1 - iq motif containing gtpase activating protein 1, TRPS1 - trichorhinophalangeal syndrome i, SHANK2 - sh3 and…
GO:2000026	regulation of multicellular organismal development	1.06e-06	0.000605	1.39	182	[LRIG2 - leucine-rich repeats and immunoglobulin-like domains 2, BMP2K - bmp2 inducible kinase, PARK2 - parkinson protein 2, e3 ubiquitin protein ligase (parkin), PDLIM5 - pdz and lim domain 5, DDX6 - dead (asp-glu-ala-asp) box helicase 6, PAX2 - paired box 2, IL12RB1 - interleukin 12 receptor, beta 1, BRCA1 - breast cancer 1, early onset, LIF - leukemia inhibitory factor, PLXNC1 - plexin c1, ATP…
GO:0045944	positive regulation of transcription by RNA polymerase II	1.96e-06	0.00108	1.51	119	[PCGF5 - polycomb group ring finger 5, PARK2 - parkinson protein 2, e3 ubiquitin protein ligase (parkin), PAX2 - paired box 2, CRTC3 - creb regulated transcription coactivator 3, PAX5 - paired box 5, KLF12 - kruppel-like factor 12, BRCA1 - breast cancer 1, early onset, ELF4 - e74-like factor 4 (ets domain transcription factor), LIF - leukemia inhibitory factor, ELK3 - elk3, ets-domain protein (sr…
GO:0048523	negative regulation of cellular process	2.22e-06	0.00118	1.23	350	[PHF21A - phd finger protein 21a, CAB39L - calcium binding protein 39-like, MAEA - macrophage erythroblast attacher, SPTBN5 - spectrin, beta, non-erythrocytic 5, BRCA1 - breast cancer 1, early onset, FBXO18 - f-box protein, helicase, 18, CBX1 - chromobox homolog 1, LIF - leukemia inhibitory factor, TSC22D4 - tsc22 domain family, member 4, PLXNC1 - plexin c1, SPOCK1 - sparc/osteonectin, cwcv and k…
GO:0045893	positive regulation of transcription, DNA-templated	5.74e-06	0.00294	1.42	143	[PARK2 - parkinson protein 2, e3 ubiquitin protein ligase (parkin), ZNF341 - zinc finger protein 341, PCGF5 - polycomb group ring finger 5, PAX2 - paired box 2, CASZ1 - castor zinc finger 1, CRTC3 - creb regulated transcription coactivator 3, PAX5 - paired box 5, KLF12 - kruppel-like factor 12, BRCA1 - breast cancer 1, early onset, ELF4 - e74-like factor 4 (ets domain transcription factor), WHSC1…
GO:0032501	multicellular organismal process	6.71e-06	0.00332	1.27	257	[CASZ1 - castor zinc finger 1, PHF21A - phd finger protein 21a, BRCA1 - breast cancer 1, early onset, ABLIM1 - actin binding lim protein 1, LIF - leukemia inhibitory factor, SHANK2 - sh3 and multiple ankyrin repeat domains 2, ASIC1 - acid-sensing (proton-gated) ion channel 1, FTO - fat mass and obesity associated, CELF4 - cugbp, elav-like family member 4, TMC2 - transmembrane channel-like 2, SPRE…
GO:0048584	positive regulation of response to stimulus	8.11e-06	0.00388	1.34	185	[BMP2K - bmp2 inducible kinase, PARK2 - parkinson protein 2, e3 ubiquitin protein ligase (parkin), UNC93B1 - unc-93 homolog b1 (c. elegans), FLT3 - fms-related tyrosine kinase 3, IL12RB1 - interleukin 12 receptor, beta 1, PSAP - prosaposin, BRCA1 - breast cancer 1, early onset, MIF - macrophage migration inhibitory factor (glycosylation-inhibiting factor), LIF - leukemia inhibitory factor, FBXO18…
GO:0050770	regulation of axonogenesis	8.71e-06	0.00404	2.31	31	[FGF13 - fibroblast growth factor 13, SIPA1L1 - signal-induced proliferation-associated 1 like 1, SLIT2 - slit homolog 2 (drosophila), DSCAM - down syndrome cell adhesion molecule, PTPRS - protein tyrosine phosphatase, receptor type, s, OLFM1 - olfactomedin 1, PLXNC1 - plexin c1, TRPC5 - transient receptor potential cation channel, subfamily c, member 5, SEMA5A - sema domain, seven thrombospondin…
GO:0048519	negative regulation of biological process	9.19e-06	0.00413	1.2	377	[NCBP1 - nuclear cap binding protein subunit 1, 80kda, OTUD5 - otu domain containing 5, PHF21A - phd finger protein 21a, CAB39L - calcium binding protein 39-like, MAEA - macrophage erythroblast attacher, SPTBN5 - spectrin, beta, non-erythrocytic 5, BRCA1 - breast cancer 1, early onset, FBXO18 - f-box protein, helicase, 18, CBX1 - chromobox homolog 1, LIF - leukemia inhibitory factor, PLXNC1 - ple…
GO:1903508	positive regulation of nucleic acid-templated transcription	9.83e-06	0.00429	1.4	148	[PARK2 - parkinson protein 2, e3 ubiquitin protein ligase (parkin), ZNF341 - zinc finger protein 341, PCGF5 - polycomb group ring finger 5, PAX2 - paired box 2, CASZ1 - castor zinc finger 1, CRTC3 - creb regulated transcription coactivator 3, KLF12 - kruppel-like factor 12, PAX5 - paired box 5, ELF4 - e74-like factor 4 (ets domain transcription factor), BRCA1 - breast cancer 1, early onset, WHSC1…
GO:1902680	positive regulation of RNA biosynthetic process	1.02e-05	0.00434	1.4	148	[PARK2 - parkinson protein 2, e3 ubiquitin protein ligase (parkin), ZNF341 - zinc finger protein 341, PCGF5 - polycomb group ring finger 5, PAX2 - paired box 2, CASZ1 - castor zinc finger 1, CRTC3 - creb regulated transcription coactivator 3, KLF12 - kruppel-like factor 12, PAX5 - paired box 5, ELF4 - e74-like factor 4 (ets domain transcription factor), BRCA1 - breast cancer 1, early onset, WHSC1…
GO:0001558	regulation of cell growth	1.09e-05	0.00447	1.86	51	[PARK2 - parkinson protein 2, e3 ubiquitin protein ligase (parkin), NCBP1 - nuclear cap binding protein subunit 1, 80kda, SLC9A1 - solute carrier family 9, subfamily a (nhe1, cation proton antiporter 1), member 1, DSCAM - down syndrome cell adhesion molecule, PTPRS - protein tyrosine phosphatase, receptor type, s, OLFM1 - olfactomedin 1, SPOCK1 - sparc/osteonectin, cwcv and kazal-like domains pro…
GO:0001764	neuron migration	1.12e-05	0.00449	2.74	22	[KIRREL3 - kin of irre like 3 (drosophila), CRK - v-crk avian sarcoma virus ct10 oncogene homolog, VEGFA - vascular endothelial growth factor a, FGF13 - fibroblast growth factor 13, DCDC2 - doublecortin domain containing 2, FGFR1 - fibroblast growth factor receptor 1, MATN2 - matrilin 2, DNER - delta/notch-like egf repeat containing, SPOCK1 - sparc/osteonectin, cwcv and kazal-like domains proteog…
GO:0050789	regulation of biological process	1.14e-05	0.00445	1.1	700	[PCGF5 - polycomb group ring finger 5, BMP2K - bmp2 inducible kinase, ZNF341 - zinc finger protein 341, OTUD5 - otu domain containing 5, LGALS3BP - lectin, galactoside-binding, soluble, 3 binding protein, AGAP3 - arfgap with gtpase domain, ankyrin repeat and ph domain 3, PHF21A - phd finger protein 21a, SPTBN5 - spectrin, beta, non-erythrocytic 5, CBX1 - chromobox homolog 1, LIF - leukemia inhibi…
f morphogenesis 2, CMAHP - cytidine monophospho-n-acetylneuraminic acid hydroxylase, pseudogene, KDM1B - lysine (k)-specific demethylase 1b, NFIA - nuclear factor i/a, CELF2 - cugbp, elav-like family member 2, NFATC2 - nuclear factor of activated t-cells, cytoplasmic, calcineurin-dependent 2, TG - thyroglobulin, RARA - retinoic acid receptor, alpha, CHST11 - carbohydrate (chondroitin 4) sulfotran…
GO:0030154	cell differentiation	1.16e-05	0.00441	1.38	156	[DDX6 - dead (asp-glu-ala-asp) box helicase 6, TCOF1 - treacher collins-franceschetti syndrome 1, PAX2 - paired box 2, FLT3 - fms-related tyrosine kinase 3, HTRA1 - htra serine peptidase 1, PAX5 - paired box 5, ELF4 - e74-like factor 4 (ets domain transcription factor), PSAP - prosaposin, NHSL1 - nhs-like 1, LIF - leukemia inhibitory factor, SPOCK1 - sparc/osteonectin, cwcv and kazal-like domains…
GO:0010771	negative regulation of cell morphogenesis involved in differentiation	1.16e-05	0.00431	2.89	20	[FGF13 - fibroblast growth factor 13, MT3 - metallothionein 3, PPP3CA - protein phosphatase 3, catalytic subunit, alpha isozyme, SLIT2 - slit homolog 2 (drosophila), PTPRS - protein tyrosine phosphatase, receptor type, s, SYNGAP1 - synaptic ras gtpase activating protein 1, TRPC5 - transient receptor potential cation channel, subfamily c, member 5, NTN1 - netrin 1, SEMA6B - sema domain, transmembr…
GO:0009966	regulation of signal transduction	1.28e-05	0.00463	1.27	249	[BMP2K - bmp2 inducible kinase, BRCA1 - breast cancer 1, early onset, FBXO18 - f-box protein, helicase, 18, LIF - leukemia inhibitory factor, IQGAP1 - iq motif containing gtpase activating protein 1, NCOR2 - nuclear receptor corepressor 2, SHANK2 - sh3 and multiple ankyrin repeat domains 2, MAML2 - mastermind-like 2 (drosophila), IQSEC3 - iq motif and sec7 domain 3, KSR1 - kinase suppressor of ra…
GO:0099177	regulation of trans-synaptic signaling	1.31e-05	0.00464	1.8	55	[PARK2 - parkinson protein 2, e3 ubiquitin protein ligase (parkin), PNKD - paroxysmal nonkinesigenic dyskinesia, SORCS2 - sortilin-related vps10 domain containing receptor 2, SRGN - serglycin, PTPRS - protein tyrosine phosphatase, receptor type, s, SHANK3 - sh3 and multiple ankyrin repeat domains 3, SHANK2 - sh3 and multiple ankyrin repeat domains 2, PLCB1 - phospholipase c, beta 1 (phosphoinosit…
GO:0050804	modulation of chemical synaptic transmission	1.31e-05	0.00453	1.8	55	[PARK2 - parkinson protein 2, e3 ubiquitin protein ligase (parkin), PNKD - paroxysmal nonkinesigenic dyskinesia, SORCS2 - sortilin-related vps10 domain containing receptor 2, SRGN - serglycin, PTPRS - protein tyrosine phosphatase, receptor type, s, SHANK3 - sh3 and multiple ankyrin repeat domains 3, SHANK2 - sh3 and multiple ankyrin repeat domains 2, PLCB1 - phospholipase c, beta 1 (phosphoinosit…
GO:0051254	positive regulation of RNA metabolic process	1.55e-05	0.00521	1.38	153	[PARK2 - parkinson protein 2, e3 ubiquitin protein ligase (parkin), ZNF341 - zinc finger protein 341, PCGF5 - polycomb group ring finger 5, NCBP1 - nuclear cap binding protein subunit 1, 80kda, PAX2 - paired box 2, CASZ1 - castor zinc finger 1, CRTC3 - creb regulated transcription coactivator 3, KLF12 - kruppel-like factor 12, PAX5 - paired box 5, ELF4 - e74-like factor 4 (ets domain transcriptio…
GO:0000122	negative regulation of transcription by RNA polymerase II	1.57e-05	0.00517	1.57	85	[PARK2 - parkinson protein 2, e3 ubiquitin protein ligase (parkin), ZNF202 - zinc finger protein 202, PHF21A - phd finger protein 21a, EHMT1 - euchromatic histone-lysine n-methyltransferase 1, CXXC5 - cxxc finger protein 5, PAX5 - paired box 5, KLF12 - kruppel-like factor 12, NKX2-5 - nk2 homeobox 5, IRF2BP1 - interferon regulatory factor 2 binding protein 1, ARID5B - at rich interactive domain 5…
GO:0007423	sensory organ development	1.63e-05	0.00526	2.75	21	[SH3PXD2B - sh3 and px domains 2b, VEGFA - vascular endothelial growth factor a, PAX2 - paired box 2, SKI - v-ski avian sarcoma viral oncogene homolog, ADAMTS18 - adam metallopeptidase with thrombospondin type 1 motif, 18, PRDM16 - pr domain containing 16, BCL11B - b-cell cll/lymphoma 11b (zinc finger protein), RXRA - retinoid x receptor, alpha, TRAF3IP1 - tnf receptor-associated factor 3 interac…
GO:0040008	regulation of growth	1.65e-05	0.0052	1.65	71	[PARK2 - parkinson protein 2, e3 ubiquitin protein ligase (parkin), NCBP1 - nuclear cap binding protein subunit 1, 80kda, NKX2-5 - nk2 homeobox 5, SLC9A1 - solute carrier family 9, subfamily a (nhe1, cation proton antiporter 1), member 1, PTPRS - protein tyrosine phosphatase, receptor type, s, DSCAM - down syndrome cell adhesion molecule, OLFM1 - olfactomedin 1, ATP8A2 - atpase, aminophospholipid…
GO:0022603	regulation of anatomical structure morphogenesis	1.69e-05	0.00522	1.49	104	[PARK2 - parkinson protein 2, e3 ubiquitin protein ligase (parkin), PDLIM5 - pdz and lim domain 5, PAX2 - paired box 2, BRCA1 - breast cancer 1, early onset, LIF - leukemia inhibitory factor, PLXNC1 - plexin c1, TRPC5 - transient receptor potential cation channel, subfamily c, member 5, BTG1 - b-cell translocation gene 1, anti-proliferative, DCC - deleted in colorectal carcinoma, IL4R - interleuk…
GO:0048638	regulation of developmental growth	1.77e-05	0.00535	1.94	43	[PARK2 - parkinson protein 2, e3 ubiquitin protein ligase (parkin), FGF13 - fibroblast growth factor 13, FGFR1 - fibroblast growth factor receptor 1, NKX2-5 - nk2 homeobox 5, JARID2 - jumonji, at rich interactive domain 2, PTPRS - protein tyrosine phosphatase, receptor type, s, DSCAM - down syndrome cell adhesion molecule, STAT3 - signal transducer and activator of transcription 3 (acute-phase re…
GO:0035556	intracellular signal transduction	1.87e-05	0.00555	1.39	144	[MCF2L - mcf.2 cell line derived transforming sequence-like, PAX2 - paired box 2, FLT3 - fms-related tyrosine kinase 3, SPTBN5 - spectrin, beta, non-erythrocytic 5, BRCA1 - breast cancer 1, early onset, MIF - macrophage migration inhibitory factor (glycosylation-inhibiting factor), LCP2 - lymphocyte cytosolic protein 2 (sh2 domain containing leukocyte protein of 76kda), PLCB1 - phospholipase c, b…
GO:0051240	positive regulation of multicellular organismal process	2e-05	0.00581	1.37	151	[PARK2 - parkinson protein 2, e3 ubiquitin protein ligase (parkin), PAX2 - paired box 2, IL12RB1 - interleukin 12 receptor, beta 1, BRCA1 - breast cancer 1, early onset, LIF - leukemia inhibitory factor, MIF - macrophage migration inhibitory factor (glycosylation-inhibiting factor), PLXNC1 - plexin c1, ATP8A2 - atpase, aminophospholipid transporter, class i, type 8a, member 2, TRPC5 - transient r…
GO:0050794	regulation of cellular process	2.15e-05	0.00612	1.1	662	[PCGF5 - polycomb group ring finger 5, BMP2K - bmp2 inducible kinase, ZNF341 - zinc finger protein 341, LGALS3BP - lectin, galactoside-binding, soluble, 3 binding protein, AGAP3 - arfgap with gtpase domain, ankyrin repeat and ph domain 3, PHF21A - phd finger protein 21a, SPTBN5 - spectrin, beta, non-erythrocytic 5, CBX1 - chromobox homolog 1, LIF - leukemia inhibitory factor, FBXO18 - f-box prote…
GO:0010647	positive regulation of cell communication	2.4e-05	0.00671	1.36	155	[BMP2K - bmp2 inducible kinase, PARK2 - parkinson protein 2, e3 ubiquitin protein ligase (parkin), FLT3 - fms-related tyrosine kinase 3, PSAP - prosaposin, LIF - leukemia inhibitory factor, FBXO18 - f-box protein, helicase, 18, MIF - macrophage migration inhibitory factor (glycosylation-inhibiting factor), CAMTA1 - calmodulin binding transcription activator 1, INHBA - inhibin, beta a, IQGAP1 - iq…
GO:0050771	negative regulation of axonogenesis	2.69e-05	0.00739	3.16	16	[MT3 - metallothionein 3, FGF13 - fibroblast growth factor 13, PTPRS - protein tyrosine phosphatase, receptor type, s, SLIT2 - slit homolog 2 (drosophila), SYNGAP1 - synaptic ras gtpase activating protein 1, NTN1 - netrin 1, SEMA6B - sema domain, transmembrane domain (tm), and cytoplasmic domain, (semaphorin) 6b, FSTL4 - follistatin-like 4, SEMA5A - sema domain, seven thrombospondin repeats (type…
GO:0006928	movement of cell or subcellular component	2.92e-05	0.00787	1.43	121	[DST - dystonin, SEMA5B - sema domain, seven thrombospondin repeats (type 1 and type 1-like), transmembrane domain (tm) and short cytoplasmic domain, (semaphorin) 5b, SPTBN5 - spectrin, beta, non-erythrocytic 5, MIF - macrophage migration inhibitory factor (glycosylation-inhibiting factor), SPOCK1 - sparc/osteonectin, cwcv and kazal-like domains proteoglycan (testican) 1, NRP2 - neuropilin 2, IQG…
GO:0051094	positive regulation of developmental process	2.96e-05	0.00783	1.42	124	[PARK2 - parkinson protein 2, e3 ubiquitin protein ligase (parkin), PAX2 - paired box 2, IL12RB1 - interleukin 12 receptor, beta 1, BRCA1 - breast cancer 1, early onset, LIF - leukemia inhibitory factor, ATP8A2 - atpase, aminophospholipid transporter, class i, type 8a, member 2, PLXNC1 - plexin c1, TRPC5 - transient receptor potential cation channel, subfamily c, member 5, INHBA - inhibin, beta a…
GO:0023056	positive regulation of signaling	3.12e-05	0.00811	1.36	155	[BMP2K - bmp2 inducible kinase, PARK2 - parkinson protein 2, e3 ubiquitin protein ligase (parkin), FLT3 - fms-related tyrosine kinase 3, PSAP - prosaposin, LIF - leukemia inhibitory factor, FBXO18 - f-box protein, helicase, 18, MIF - macrophage migration inhibitory factor (glycosylation-inhibiting factor), CAMTA1 - calmodulin binding transcription activator 1, INHBA - inhibin, beta a, IQGAP1 - iq…
GO:0010976	positive regulation of neuron projection development	3.13e-05	0.008	1.97	39	[AP2A1 - adaptor-related protein complex 2, alpha 1 subunit, PARK2 - parkinson protein 2, e3 ubiquitin protein ligase (parkin), FGFR1 - fibroblast growth factor receptor 1, ROR1 - receptor tyrosine kinase-like orphan receptor 1, DSCAM - down syndrome cell adhesion molecule, SLIT2 - slit homolog 2 (drosophila), RIMS1 - regulating synaptic membrane exocytosis 1, PLXNC1 - plexin c1, ATP8A2 - atpase,…
GO:0031346	positive regulation of cell projection organization	3.21e-05	0.00807	1.82	48	[AP2A1 - adaptor-related protein complex 2, alpha 1 subunit, PARK2 - parkinson protein 2, e3 ubiquitin protein ligase (parkin), FGFR1 - fibroblast growth factor receptor 1, ROR1 - receptor tyrosine kinase-like orphan receptor 1, DSCAM - down syndrome cell adhesion molecule, SLIT2 - slit homolog 2 (drosophila), RIMS1 - regulating synaptic membrane exocytosis 1, PLXNC1 - plexin c1, ATP8A2 - atpase,…
GO:0045596	negative regulation of cell differentiation	3.22e-05	0.00795	1.62	70	[LRIG2 - leucine-rich repeats and immunoglobulin-like domains 2, DDX6 - dead (asp-glu-ala-asp) box helicase 6, NKX2-5 - nk2 homeobox 5, PTPRS - protein tyrosine phosphatase, receptor type, s, SPOCK1 - sparc/osteonectin, cwcv and kazal-like domains proteoglycan (testican) 1, DENND5A - denn/madd domain containing 5a, TRPC5 - transient receptor potential cation channel, subfamily c, member 5, FSTL4 …
GO:0050773	regulation of dendrite development	3.42e-05	0.00831	2.39	25	[PDLIM5 - pdz and lim domain 5, CRK - v-crk avian sarcoma virus ct10 oncogene homolog, SIPA1L1 - signal-induced proliferation-associated 1 like 1, PTPRS - protein tyrosine phosphatase, receptor type, s, TRPC5 - transient receptor potential cation channel, subfamily c, member 5, FSTL4 - follistatin-like 4, IQGAP1 - iq motif containing gtpase activating protein 1, SHANK3 - sh3 and multiple ankyrin …
GO:0030155	regulation of cell adhesion	3.46e-05	0.00827	1.61	71	[SYK - spleen tyrosine kinase, SLC9A1 - solute carrier family 9, subfamily a (nhe1, cation proton antiporter 1), member 1, IL12RB1 - interleukin 12 receptor, beta 1, DSCAM - down syndrome cell adhesion molecule, SPOCK1 - sparc/osteonectin, cwcv and kazal-like domains proteoglycan (testican) 1, PLXNC1 - plexin c1, IQGAP1 - iq motif containing gtpase activating protein 1, COL26A1 - collagen, type x…
GO:0048468	cell development	3.54e-05	0.00833	1.63	68	[CRB1 - crumbs homolog 1 (drosophila), TCOF1 - treacher collins-franceschetti syndrome 1, MAEA - macrophage erythroblast attacher, NKX2-5 - nk2 homeobox 5, PSAP - prosaposin, PTPRS - protein tyrosine phosphatase, receptor type, s, LIF - leukemia inhibitory factor, ARID5B - at rich interactive domain 5b (mrf1-like), ATP8A2 - atpase, aminophospholipid transporter, class i, type 8a, member 2, FLI1 -…
GO:0061387	regulation of extent of cell growth	3.7e-05	0.00858	2.61	21	[VEGFA - vascular endothelial growth factor a, FGF13 - fibroblast growth factor 13, MT3 - metallothionein 3, DSCAM - down syndrome cell adhesion molecule, PTPRS - protein tyrosine phosphatase, receptor type, s, OLFM1 - olfactomedin 1, PLXNA4 - plexin a4, TRPC5 - transient receptor potential cation channel, subfamily c, member 5, SEMA6B - sema domain, transmembrane domain (tm), and cytoplasmic dom…
GO:0045926	negative regulation of growth	3.7e-05	0.00845	2.09	33	[FGF13 - fibroblast growth factor 13, TCHP - trichoplein, keratin filament binding, JARID2 - jumonji, at rich interactive domain 2, PTPRS - protein tyrosine phosphatase, receptor type, s, SLIT2 - slit homolog 2 (drosophila), SEMA5A - sema domain, seven thrombospondin repeats (type 1 and type 1-like), transmembrane domain (tm) and short cytoplasmic domain, (semaphorin) 5a, FSTL4 - follistatin-like…
GO:0010977	negative regulation of neuron projection development	3.91e-05	0.00878	2.37	25	[LRIG2 - leucine-rich repeats and immunoglobulin-like domains 2, FGF13 - fibroblast growth factor 13, PTPRS - protein tyrosine phosphatase, receptor type, s, SLIT2 - slit homolog 2 (drosophila), SPOCK1 - sparc/osteonectin, cwcv and kazal-like domains proteoglycan (testican) 1, DENND5A - denn/madd domain containing 5a, TRPC5 - transient receptor potential cation channel, subfamily c, member 5, FST…
GO:0031345	negative regulation of cell projection organization	3.91e-05	0.00866	2.25	28	[LRIG2 - leucine-rich repeats and immunoglobulin-like domains 2, FGF13 - fibroblast growth factor 13, TCHP - trichoplein, keratin filament binding, PTPRS - protein tyrosine phosphatase, receptor type, s, SLIT2 - slit homolog 2 (drosophila), DENND5A - denn/madd domain containing 5a, SPOCK1 - sparc/osteonectin, cwcv and kazal-like domains proteoglycan (testican) 1, TRPC5 - transient receptor potent…
GO:0051093	negative regulation of developmental process	4.05e-05	0.00884	1.52	89	[LRIG2 - leucine-rich repeats and immunoglobulin-like domains 2, PARK2 - parkinson protein 2, e3 ubiquitin protein ligase (parkin), AKT3 - v-akt murine thymoma viral oncogene homolog 3, DDX6 - dead (asp-glu-ala-asp) box helicase 6, PAX2 - paired box 2, NKX2-5 - nk2 homeobox 5, PTPRS - protein tyrosine phosphatase, receptor type, s, SRGN - serglycin, TRAF3IP1 - tnf receptor-associated factor 3 int…
GO:0045666	positive regulation of neuron differentiation	4.18e-05	0.00897	1.83	46	[AP2A1 - adaptor-related protein complex 2, alpha 1 subunit, PARK2 - parkinson protein 2, e3 ubiquitin protein ligase (parkin), FGFR1 - fibroblast growth factor receptor 1, ROR1 - receptor tyrosine kinase-like orphan receptor 1, NKX2-5 - nk2 homeobox 5, DSCAM - down syndrome cell adhesion molecule, SLIT2 - slit homolog 2 (drosophila), RIMS1 - regulating synaptic membrane exocytosis 1, PLXNC1 - pl…
GO:0048583	regulation of response to stimulus	4.8e-05	0.0102	1.21	307	[BMP2K - bmp2 inducible kinase, UNC93B1 - unc-93 homolog b1 (c. elegans), BRCA1 - breast cancer 1, early onset, FBXO18 - f-box protein, helicase, 18, LIF - leukemia inhibitory factor, NCOR2 - nuclear receptor corepressor 2, IQGAP1 - iq motif containing gtpase activating protein 1, LCP2 - lymphocyte cytosolic protein 2 (sh2 domain containing leukocyte protein of 76kda), SHANK2 - sh3 and multiple a…
GO:0045935	positive regulation of nucleobase-containing compound metabolic process	4.92e-05	0.0103	1.33	163	[PARK2 - parkinson protein 2, e3 ubiquitin protein ligase (parkin), PCGF5 - polycomb group ring finger 5, ZNF341 - zinc finger protein 341, NCBP1 - nuclear cap binding protein subunit 1, 80kda, PAX2 - paired box 2, CASZ1 - castor zinc finger 1, CRTC3 - creb regulated transcription coactivator 3, PAX5 - paired box 5, KLF12 - kruppel-like factor 12, ELF4 - e74-like factor 4 (ets domain transcriptio…
GO:0043087	regulation of GTPase activity	5.81e-05	0.012	1.74	52	[AGAP3 - arfgap with gtpase domain, ankyrin repeat and ph domain 3, DOCK4 - dedicator of cytokinesis 4, PTPRN2 - protein tyrosine phosphatase, receptor type, n polypeptide 2, ARHGAP26 - rho gtpase activating protein 26, PLXNC1 - plexin c1, RASAL2 - ras protein activator like 2, STMN3 - stathmin-like 3, ARHGAP10 - rho gtpase activating protein 10, ARHGAP24 - rho gtpase activating protein 24, IQGAP…
GO:0002433	immune response-regulating cell surface receptor signaling pathway involved in phagocytosis	5.82e-05	0.0118	3.11	15	[MYO10 - myosin x, CRK - v-crk avian sarcoma virus ct10 oncogene homolog, SYK - spleen tyrosine kinase, MAPK1 - mitogen-activated protein kinase 1, MYO1G - myosin ig, GRB2 - growth factor receptor-bound protein 2, PRKCE - protein kinase c, epsilon, PLCG2 - phospholipase c, gamma 2 (phosphatidylinositol-specific), ACTG1 - actin, gamma 1, FYN - fyn oncogene related to src, fgr, yes, MYO1C - myosin …
GO:0038096	Fc-gamma receptor signaling pathway involved in phagocytosis	5.82e-05	0.0117	3.11	15	[MYO10 - myosin x, CRK - v-crk avian sarcoma virus ct10 oncogene homolog, SYK - spleen tyrosine kinase, MAPK1 - mitogen-activated protein kinase 1, MYO1G - myosin ig, GRB2 - growth factor receptor-bound protein 2, PRKCE - protein kinase c, epsilon, PLCG2 - phospholipase c, gamma 2 (phosphatidylinositol-specific), ACTG1 - actin, gamma 1, MYO1C - myosin ic, FYN - fyn oncogene related to src, fgr, y…
GO:0009893	positive regulation of metabolic process	5.94e-05	0.0117	1.22	275	[PCGF5 - polycomb group ring finger 5, ZNF341 - zinc finger protein 341, NCBP1 - nuclear cap binding protein subunit 1, 80kda, CASZ1 - castor zinc finger 1, BRCA1 - breast cancer 1, early onset, ELF4 - e74-like factor 4 (ets domain transcription factor), LIF - leukemia inhibitory factor, FBXO18 - f-box protein, helicase, 18, WHSC1L1 - wolf-hirschhorn syndrome candidate 1-like 1, ELK3 - elk3, ets-…
GO:0045892	negative regulation of transcription, DNA-templated	6.73e-05	0.0131	1.45	103	[PARK2 - parkinson protein 2, e3 ubiquitin protein ligase (parkin), ZNF202 - zinc finger protein 202, PAX2 - paired box 2, PHF21A - phd finger protein 21a, PAX5 - paired box 5, KLF12 - kruppel-like factor 12, BRCA1 - breast cancer 1, early onset, CBX1 - chromobox homolog 1, TSC22D4 - tsc22 domain family, member 4, ELK3 - elk3, ets-domain protein (srf accessory protein 2), NCOR2 - nuclear receptor…
GO:0038094	Fc-gamma receptor signaling pathway	7.16e-05	0.0138	3.06	15	[MYO10 - myosin x, CRK - v-crk avian sarcoma virus ct10 oncogene homolog, SYK - spleen tyrosine kinase, MAPK1 - mitogen-activated protein kinase 1, MYO1G - myosin ig, GRB2 - growth factor receptor-bound protein 2, PRKCE - protein kinase c, epsilon, PLCG2 - phospholipase c, gamma 2 (phosphatidylinositol-specific), ACTG1 - actin, gamma 1, FYN - fyn oncogene related to src, fgr, yes, MYO1C - myosin …
GO:0045785	positive regulation of cell adhesion	7.25e-05	0.0138	1.79	46	[ITGA5 - integrin, alpha 5 (fibronectin receptor, alpha polypeptide), CRK - v-crk avian sarcoma virus ct10 oncogene homolog, RHOH - ras homolog family member h, SYK - spleen tyrosine kinase, KIF26B - kinesin family member 26b, DYSF - dysferlin, limb girdle muscular dystrophy 2b (autosomal recessive), IL12RB1 - interleukin 12 receptor, beta 1, NEDD9 - neural precursor cell expressed, developmental…
GO:0007169	transmembrane receptor protein tyrosine kinase signaling pathway	7.66e-05	0.0144	1.68	56	[ARHGEF28 - rho guanine nucleotide exchange factor (gef) 28, AP2A1 - adaptor-related protein complex 2, alpha 1 subunit, NCF4 - neutrophil cytosolic factor 4, 40kda, NCBP1 - nuclear cap binding protein subunit 1, 80kda, SYK - spleen tyrosine kinase, FLT3 - fms-related tyrosine kinase 3, ARID5B - at rich interactive domain 5b (mrf1-like), NRP2 - neuropilin 2, IQGAP1 - iq motif containing gtpase ac…
GO:0010628	positive regulation of gene expression	8.22e-05	0.0152	1.31	167	[PCGF5 - polycomb group ring finger 5, ZNF341 - zinc finger protein 341, PARK2 - parkinson protein 2, e3 ubiquitin protein ligase (parkin), NCBP1 - nuclear cap binding protein subunit 1, 80kda, PAX2 - paired box 2, CASZ1 - castor zinc finger 1, CRTC3 - creb regulated transcription coactivator 3, PAX5 - paired box 5, KLF12 - kruppel-like factor 12, BRCA1 - breast cancer 1, early onset, ELF4 - e74-…
GO:0002431	Fc receptor mediated stimulatory signaling pathway	8.75e-05	0.016	3.01	15	[MYO10 - myosin x, CRK - v-crk avian sarcoma virus ct10 oncogene homolog, SYK - spleen tyrosine kinase, MAPK1 - mitogen-activated protein kinase 1, MYO1G - myosin ig, GRB2 - growth factor receptor-bound protein 2, PRKCE - protein kinase c, epsilon, PLCG2 - phospholipase c, gamma 2 (phosphatidylinositol-specific), ACTG1 - actin, gamma 1, FYN - fyn oncogene related to src, fgr, yes, MYO1C - myosin …
GO:0030308	negative regulation of cell growth	9.1e-05	0.0165	2.18	27	[FGF13 - fibroblast growth factor 13, TCHP - trichoplein, keratin filament binding, PTPRS - protein tyrosine phosphatase, receptor type, s, SLIT2 - slit homolog 2 (drosophila), FSTL4 - follistatin-like 4, INHBA - inhibin, beta a, SEMA5A - sema domain, seven thrombospondin repeats (type 1 and type 1-like), transmembrane domain (tm) and short cytoplasmic domain, (semaphorin) 5a, BTG1 - b-cell trans…
GO:0031325	positive regulation of cellular metabolic process	9.46e-05	0.0169	1.23	254	[ZNF341 - zinc finger protein 341, PCGF5 - polycomb group ring finger 5, NCBP1 - nuclear cap binding protein subunit 1, 80kda, CASZ1 - castor zinc finger 1, BRCA1 - breast cancer 1, early onset, ELF4 - e74-like factor 4 (ets domain transcription factor), LIF - leukemia inhibitory factor, FBXO18 - f-box protein, helicase, 18, WHSC1L1 - wolf-hirschhorn syndrome candidate 1-like 1, ELK3 - elk3, ets-…
GO:0009967	positive regulation of signal transduction	0.000109	0.0192	1.35	140	[BMP2K - bmp2 inducible kinase, PARK2 - parkinson protein 2, e3 ubiquitin protein ligase (parkin), FLT3 - fms-related tyrosine kinase 3, PSAP - prosaposin, LIF - leukemia inhibitory factor, FBXO18 - f-box protein, helicase, 18, MIF - macrophage migration inhibitory factor (glycosylation-inhibiting factor), CAMTA1 - calmodulin binding transcription activator 1, INHBA - inhibin, beta a, IQGAP1 - iq…
GO:1903507	negative regulation of nucleic acid-templated transcription	0.000119	0.0207	1.42	105	[PARK2 - parkinson protein 2, e3 ubiquitin protein ligase (parkin), PAX2 - paired box 2, ZNF202 - zinc finger protein 202, PHF21A - phd finger protein 21a, PAX5 - paired box 5, KLF12 - kruppel-like factor 12, BRCA1 - breast cancer 1, early onset, CBX1 - chromobox homolog 1, TSC22D4 - tsc22 domain family, member 4, ELK3 - elk3, ets-domain protein (srf accessory protein 2), NCOR2 - nuclear receptor…
GO:0065008	regulation of biological quality	0.000124	0.0213	1.21	281	[NCF4 - neutrophil cytosolic factor 4, 40kda, C9orf3 - chromosome 9 open reading frame 3, PHF21A - phd finger protein 21a, SPTBN5 - spectrin, beta, non-erythrocytic 5, LIF - leukemia inhibitory factor, PLXNC1 - plexin c1, HSD11B1 - hydroxysteroid (11-beta) dehydrogenase 1, TRPC5 - transient receptor potential cation channel, subfamily c, member 5, ENSA - endosulfine alpha, KCNK9 - potassium chann…
GO:1902679	negative regulation of RNA biosynthetic process	0.000124	0.0211	1.42	105	[PARK2 - parkinson protein 2, e3 ubiquitin protein ligase (parkin), PAX2 - paired box 2, ZNF202 - zinc finger protein 202, PHF21A - phd finger protein 21a, PAX5 - paired box 5, KLF12 - kruppel-like factor 12, BRCA1 - breast cancer 1, early onset, CBX1 - chromobox homolog 1, TSC22D4 - tsc22 domain family, member 4, ELK3 - elk3, ets-domain protein (srf accessory protein 2), NCOR2 - nuclear receptor…
GO:0051128	regulation of cellular component organization	0.000132	0.0222	1.26	204	[BMP2K - bmp2 inducible kinase, NCBP1 - nuclear cap binding protein subunit 1, 80kda, SPTBN5 - spectrin, beta, non-erythrocytic 5, BRCA1 - breast cancer 1, early onset, WHSC1L1 - wolf-hirschhorn syndrome candidate 1-like 1, LIF - leukemia inhibitory factor, SPOCK1 - sparc/osteonectin, cwcv and kazal-like domains proteoglycan (testican) 1, PLXNC1 - plexin c1, TRPC5 - transient receptor potential c…
GO:0010604	positive regulation of macromolecule metabolic process	0.000141	0.0234	1.22	254	[ZNF341 - zinc finger protein 341, PCGF5 - polycomb group ring finger 5, NCBP1 - nuclear cap binding protein subunit 1, 80kda, CASZ1 - castor zinc finger 1, ELF4 - e74-like factor 4 (ets domain transcription factor), BRCA1 - breast cancer 1, early onset, FBXO18 - f-box protein, helicase, 18, WHSC1L1 - wolf-hirschhorn syndrome candidate 1-like 1, LIF - leukemia inhibitory factor, ELK3 - elk3, ets-…
GO:0009887	animal organ morphogenesis	0.000143	0.0236	1.65	55	[PAX2 - paired box 2, SYK - spleen tyrosine kinase, PAX5 - paired box 5, NKX2-5 - nk2 homeobox 5, HTRA1 - htra serine peptidase 1, STK40 - serine/threonine kinase 40, ABLIM1 - actin binding lim protein 1, LIF - leukemia inhibitory factor, ARID5B - at rich interactive domain 5b (mrf1-like), INHBA - inhibin, beta a, FLI1 - fli-1 proto-oncogene, ets transcription factor, NRP2 - neuropilin 2, SHANK3 …
GO:0040007	growth	0.000152	0.0247	1.85	38	[ERCC6 - excision repair cross-complementing rodent repair deficiency, complementation group 6, PDLIM5 - pdz and lim domain 5, SEMA5B - sema domain, seven thrombospondin repeats (type 1 and type 1-like), transmembrane domain (tm) and short cytoplasmic domain, (semaphorin) 5b, DYSF - dysferlin, limb girdle muscular dystrophy 2b (autosomal recessive), KIF26B - kinesin family member 26b, STK40 - ser…
GO:0030516	regulation of axon extension	0.00016	0.0257	2.57	18	[VEGFA - vascular endothelial growth factor a, MT3 - metallothionein 3, DSCAM - down syndrome cell adhesion molecule, PTPRS - protein tyrosine phosphatase, receptor type, s, OLFM1 - olfactomedin 1, PLXNA4 - plexin a4, TRPC5 - transient receptor potential cation channel, subfamily c, member 5, SEMA6B - sema domain, transmembrane domain (tm), and cytoplasmic domain, (semaphorin) 6b, NTN1 - netrin 1…
GO:0016477	cell migration	0.000161	0.0256	1.51	77	[SYK - spleen tyrosine kinase, DOCK4 - dedicator of cytokinesis 4, SLC9A1 - solute carrier family 9, subfamily a (nhe1, cation proton antiporter 1), member 1, MIF - macrophage migration inhibitory factor (glycosylation-inhibiting factor), ARID5B - at rich interactive domain 5b (mrf1-like), SPOCK1 - sparc/osteonectin, cwcv and kazal-like domains proteoglycan (testican) 1, LYST - lysosomal traffick…
GO:0010720	positive regulation of cell development	0.000172	0.0272	1.61	59	[PARK2 - parkinson protein 2, e3 ubiquitin protein ligase (parkin), AP2A1 - adaptor-related protein complex 2, alpha 1 subunit, NKX2-5 - nk2 homeobox 5, DSCAM - down syndrome cell adhesion molecule, LIF - leukemia inhibitory factor, ATP8A2 - atpase, aminophospholipid transporter, class i, type 8a, member 2, PLXNC1 - plexin c1, TRPC5 - transient receptor potential cation channel, subfamily c, memb…
GO:0050769	positive regulation of neurogenesis	0.000177	0.0277	1.66	53	[AP2A1 - adaptor-related protein complex 2, alpha 1 subunit, PARK2 - parkinson protein 2, e3 ubiquitin protein ligase (parkin), NKX2-5 - nk2 homeobox 5, DSCAM - down syndrome cell adhesion molecule, LIF - leukemia inhibitory factor, ATP8A2 - atpase, aminophospholipid transporter, class i, type 8a, member 2, PLXNC1 - plexin c1, TRPC5 - transient receptor potential cation channel, subfamily c, memb…
GO:0048589	developmental growth	0.00018	0.0278	1.85	37	[ERCC6 - excision repair cross-complementing rodent repair deficiency, complementation group 6, PDLIM5 - pdz and lim domain 5, SEMA5B - sema domain, seven thrombospondin repeats (type 1 and type 1-like), transmembrane domain (tm) and short cytoplasmic domain, (semaphorin) 5b, DYSF - dysferlin, limb girdle muscular dystrophy 2b (autosomal recessive), KIF26B - kinesin family member 26b, STK40 - ser…
GO:0043547	positive regulation of GTPase activity	0.000221	0.0338	1.75	43	[CRK - v-crk avian sarcoma virus ct10 oncogene homolog, AGAP3 - arfgap with gtpase domain, ankyrin repeat and ph domain 3, DOCK9 - dedicator of cytokinesis 9, RASA3 - ras p21 protein activator 3, DOCK4 - dedicator of cytokinesis 4, SIPA1L1 - signal-induced proliferation-associated 1 like 1, ARHGAP26 - rho gtpase activating protein 26, NEDD9 - neural precursor cell expressed, developmentally down-…
GO:0044093	positive regulation of molecular function	0.000228	0.0345	1.32	145	[NCF4 - neutrophil cytosolic factor 4, 40kda, PARK2 - parkinson protein 2, e3 ubiquitin protein ligase (parkin), NCBP1 - nuclear cap binding protein subunit 1, 80kda, LMF1 - lipase maturation factor 1, AGAP3 - arfgap with gtpase domain, ankyrin repeat and ph domain 3, FLT3 - fms-related tyrosine kinase 3, CRTC3 - creb regulated transcription coactivator 3, PSAP - prosaposin, MIF - macrophage migr…
GO:0045665	negative regulation of neuron differentiation	0.000236	0.0354	2	29	[LRIG2 - leucine-rich repeats and immunoglobulin-like domains 2, DDX6 - dead (asp-glu-ala-asp) box helicase 6, FGF13 - fibroblast growth factor 13, PTPRS - protein tyrosine phosphatase, receptor type, s, SLIT2 - slit homolog 2 (drosophila), SPOCK1 - sparc/osteonectin, cwcv and kazal-like domains proteoglycan (testican) 1, DENND5A - denn/madd domain containing 5a, TRPC5 - transient receptor potent…
GO:0048640	negative regulation of developmental growth	0.00025	0.037	2.49	18	[TBX5 - t-box 5, MT3 - metallothionein 3, FGF13 - fibroblast growth factor 13, JARID2 - jumonji, at rich interactive domain 2, PTPRS - protein tyrosine phosphatase, receptor type, s, NTN1 - netrin 1, SEMA6B - sema domain, transmembrane domain (tm), and cytoplasmic domain, (semaphorin) 6b, FSTL4 - follistatin-like 4, SEMA5A - sema domain, seven thrombospondin repeats (type 1 and type 1-like), tran…
GO:0010557	positive regulation of macromolecule biosynthetic process	0.00028	0.0411	1.3	157	[PARK2 - parkinson protein 2, e3 ubiquitin protein ligase (parkin), ZNF341 - zinc finger protein 341, PCGF5 - polycomb group ring finger 5, PAX2 - paired box 2, CASZ1 - castor zinc finger 1, CRTC3 - creb regulated transcription coactivator 3, KLF12 - kruppel-like factor 12, PAX5 - paired box 5, ELF4 - e74-like factor 4 (ets domain transcription factor), BRCA1 - breast cancer 1, early onset, WHSC1…
GO:0010629	negative regulation of gene expression	0.000296	0.0431	1.33	134	[PARK2 - parkinson protein 2, e3 ubiquitin protein ligase (parkin), DDX6 - dead (asp-glu-ala-asp) box helicase 6, NCBP1 - nuclear cap binding protein subunit 1, 80kda, ZNF202 - zinc finger protein 202, PAX2 - paired box 2, PHF21A - phd finger protein 21a, PAX5 - paired box 5, KLF12 - kruppel-like factor 12, BRCA1 - breast cancer 1, early onset, CBX1 - chromobox homolog 1, MIF - macrophage migrati…
GO:0048675	axon extension	0.000311	0.0448	3.86	9	[SEMA5A - sema domain, seven thrombospondin repeats (type 1 and type 1-like), transmembrane domain (tm) and short cytoplasmic domain, (semaphorin) 5a, NRP2 - neuropilin 2, AUTS2 - autism susceptibility candidate 2, SEMA5B - sema domain, seven thrombospondin repeats (type 1 and type 1-like), transmembrane domain (tm) and short cytoplasmic domain, (semaphorin) 5b, SLIT3 - slit homolog 3 (drosophila…
GO:0010558	negative regulation of macromolecule biosynthetic process	0.000321	0.0458	1.35	119	[PARK2 - parkinson protein 2, e3 ubiquitin protein ligase (parkin), ZNF202 - zinc finger protein 202, PAX2 - paired box 2, PHF21A - phd finger protein 21a, KLF12 - kruppel-like factor 12, PAX5 - paired box 5, BRCA1 - breast cancer 1, early onset, CBX1 - chromobox homolog 1, FBXO18 - f-box protein, helicase, 18, TSC22D4 - tsc22 domain family, member 4, ELK3 - elk3, ets-domain protein (srf accessor…
GO:0040011	locomotion	0.000366	0.0516	1.42	89	[DST - dystonin, SYK - spleen tyrosine kinase, DOCK4 - dedicator of cytokinesis 4, SLC9A1 - solute carrier family 9, subfamily a (nhe1, cation proton antiporter 1), member 1, MIF - macrophage migration inhibitory factor (glycosylation-inhibiting factor), ARID5B - at rich interactive domain 5b (mrf1-like), SPOCK1 - sparc/osteonectin, cwcv and kazal-like domains proteoglycan (testican) 1, NRP2 - ne…
GO:0051253	negative regulation of RNA metabolic process	0.000385	0.0539	1.37	109	[PARK2 - parkinson protein 2, e3 ubiquitin protein ligase (parkin), PAX2 - paired box 2, ZNF202 - zinc finger protein 202, PHF21A - phd finger protein 21a, KLF12 - kruppel-like factor 12, PAX5 - paired box 5, BRCA1 - breast cancer 1, early onset, CBX1 - chromobox homolog 1, TSC22D4 - tsc22 domain family, member 4, ELK3 - elk3, ets-domain protein (srf accessory protein 2), NCOR2 - nuclear receptor…
GO:0048731	system development	0.00039	0.0541	1.51	68	[PARK2 - parkinson protein 2, e3 ubiquitin protein ligase (parkin), TCOF1 - treacher collins-franceschetti syndrome 1, PAX2 - paired box 2, ZNF423 - zinc finger protein 423, NKX2-5 - nk2 homeobox 5, ARHGAP26 - rho gtpase activating protein 26, DSCAM - down syndrome cell adhesion molecule, LIF - leukemia inhibitory factor, OLFM1 - olfactomedin 1, SPOCK1 - sparc/osteonectin, cwcv and kazal-like dom…
GO:0031328	positive regulation of cellular biosynthetic process	0.000394	0.0541	1.28	163	[PCGF5 - polycomb group ring finger 5, ZNF341 - zinc finger protein 341, PARK2 - parkinson protein 2, e3 ubiquitin protein ligase (parkin), PAX2 - paired box 2, CASZ1 - castor zinc finger 1, CRTC3 - creb regulated transcription coactivator 3, KLF12 - kruppel-like factor 12, PAX5 - paired box 5, BRCA1 - breast cancer 1, early onset, ELF4 - e74-like factor 4 (ets domain transcription factor), LIF -…
GO:0051961	negative regulation of nervous system development	0.000406	0.0552	1.8	36	[LRIG2 - leucine-rich repeats and immunoglobulin-like domains 2, DDX6 - dead (asp-glu-ala-asp) box helicase 6, FGF13 - fibroblast growth factor 13, PTPRS - protein tyrosine phosphatase, receptor type, s, TRAF3IP1 - tnf receptor-associated factor 3 interacting protein 1, SLIT2 - slit homolog 2 (drosophila), STAT3 - signal transducer and activator of transcription 3 (acute-phase response factor), S…
GO:0030949	positive regulation of vascular endothelial growth factor receptor signaling pathway	0.000456	0.0614	5.33	6	[ITGA5 - integrin, alpha 5 (fibronectin receptor, alpha polypeptide), GRB10 - growth factor receptor-bound protein 10, VEGFA - vascular endothelial growth factor a, MT3 - metallothionein 3, PRKCB - protein kinase c, beta, HIF1A - hypoxia inducible factor 1, alpha subunit (basic helix-loop-helix transcription factor)]
GO:0006816	calcium ion transport	0.00046	0.0614	1.86	32	[TRPC7 - transient receptor potential cation channel, subfamily c, member 7, ATP2B2 - atpase, ca++ transporting, plasma membrane 2, RASA3 - ras p21 protein activator 3, PLCH2 - phospholipase c, eta 2, TRPC5 - transient receptor potential cation channel, subfamily c, member 5, NALCN - sodium leak channel, non-selective, CDH23 - cadherin-related 23, CASK - calcium/calmodulin-dependent serine protei…
GO:1903708	positive regulation of hemopoiesis	0.000499	0.0661	2.03	25	[CTNNBIP1 - catenin, beta interacting protein 1, RHOH - ras homolog family member h, SYK - spleen tyrosine kinase, IL12RB1 - interleukin 12 receptor, beta 1, STAT1 - signal transducer and activator of transcription 1, 91kda, STAT3 - signal transducer and activator of transcription 3 (acute-phase response factor), LIF - leukemia inhibitory factor, VNN1 - vanin 1, INHBA - inhibin, beta a, GLI2 - gl…
GO:0038093	Fc receptor signaling pathway	0.000529	0.0694	2.06	24	[MAPK10 - mitogen-activated protein kinase 10, MYO10 - myosin x, GRAP2 - grb2-related adaptor protein 2, CRK - v-crk avian sarcoma virus ct10 oncogene homolog, SYK - spleen tyrosine kinase, PPP3CA - protein phosphatase 3, catalytic subunit, alpha isozyme, MAPK1 - mitogen-activated protein kinase 1, PRKCQ - protein kinase c, theta, MYO1G - myosin ig, GRB2 - growth factor receptor-bound protein 2, …
GO:0046643	regulation of gamma-delta T cell activation	0.000547	0.0711	8.29	4	[SYK - spleen tyrosine kinase, SOX13 - sry (sex determining region y)-box 13, PTPRC - protein tyrosine phosphatase, receptor type, c, NOD2 - nucleotide-binding oligomerization domain containing 2]
GO:0031327	negative regulation of cellular biosynthetic process	0.000552	0.0712	1.33	122	[PARK2 - parkinson protein 2, e3 ubiquitin protein ligase (parkin), PAX2 - paired box 2, ZNF202 - zinc finger protein 202, PHF21A - phd finger protein 21a, MAEA - macrophage erythroblast attacher, KLF12 - kruppel-like factor 12, PAX5 - paired box 5, BRCA1 - breast cancer 1, early onset, CBX1 - chromobox homolog 1, FBXO18 - f-box protein, helicase, 18, TSC22D4 - tsc22 domain family, member 4, ELK3…
GO:0051173	positive regulation of nitrogen compound metabolic process	0.000571	0.0729	1.2	240	[ZNF341 - zinc finger protein 341, PCGF5 - polycomb group ring finger 5, NCBP1 - nuclear cap binding protein subunit 1, 80kda, CASZ1 - castor zinc finger 1, ELF4 - e74-like factor 4 (ets domain transcription factor), BRCA1 - breast cancer 1, early onset, FBXO18 - f-box protein, helicase, 18, WHSC1L1 - wolf-hirschhorn syndrome candidate 1-like 1, LIF - leukemia inhibitory factor, ELK3 - elk3, ets-…
GO:0010810	regulation of cell-substrate adhesion	0.000581	0.0736	1.95	27	[ITGA5 - integrin, alpha 5 (fibronectin receptor, alpha polypeptide), CRK - v-crk avian sarcoma virus ct10 oncogene homolog, SLC9A1 - solute carrier family 9, subfamily a (nhe1, cation proton antiporter 1), member 1, SPOCK1 - sparc/osteonectin, cwcv and kazal-like domains proteoglycan (testican) 1, NEDD9 - neural precursor cell expressed, developmentally down-regulated 9, VWC2 - von willebrand fa…
GO:0007155	cell adhesion	0.000594	0.0746	1.44	78	[DST - dystonin, CRB1 - crumbs homolog 1 (drosophila), PDLIM5 - pdz and lim domain 5, LGALS3BP - lectin, galactoside-binding, soluble, 3 binding protein, SYK - spleen tyrosine kinase, MAEA - macrophage erythroblast attacher, PTPRS - protein tyrosine phosphatase, receptor type, s, DSCAM - down syndrome cell adhesion molecule, SPOCK1 - sparc/osteonectin, cwcv and kazal-like domains proteoglycan (te…
GO:0120039	plasma membrane bounded cell projection morphogenesis	0.000594	0.074	1.9	29	[PAX2 - paired box 2, LRP2 - low density lipoprotein receptor-related protein 2, DSCAM - down syndrome cell adhesion molecule, ATP8A2 - atpase, aminophospholipid transporter, class i, type 8a, member 2, EGFR - epidermal growth factor receptor, GLI2 - gli family zinc finger 2, NR4A2 - nuclear receptor subfamily 4, group a, member 2, SHANK3 - sh3 and multiple ankyrin repeat domains 3, SHANK2 - sh3 …
GO:0051962	positive regulation of nervous system development	0.000596	0.0736	1.55	56	[AP2A1 - adaptor-related protein complex 2, alpha 1 subunit, PARK2 - parkinson protein 2, e3 ubiquitin protein ligase (parkin), PAX2 - paired box 2, NKX2-5 - nk2 homeobox 5, DSCAM - down syndrome cell adhesion molecule, LIF - leukemia inhibitory factor, ATP8A2 - atpase, aminophospholipid transporter, class i, type 8a, member 2, PLXNC1 - plexin c1, TRPC5 - transient receptor potential cation chann…
GO:0030001	metal ion transport	0.000609	0.0747	1.51	63	[KCNK5 - potassium channel, subfamily k, member 5, SLC39A11 - solute carrier family 39, member 11, TRPC7 - transient receptor potential cation channel, subfamily c, member 7, ATP2B2 - atpase, ca++ transporting, plasma membrane 2, KCNQ4 - potassium voltage-gated channel, kqt-like subfamily, member 4, SLC9A1 - solute carrier family 9, subfamily a (nhe1, cation proton antiporter 1), member 1, SLC9A7…
GO:0048870	cell motility	0.000611	0.0742	1.43	81	[DST - dystonin, SYK - spleen tyrosine kinase, DOCK4 - dedicator of cytokinesis 4, SLC9A1 - solute carrier family 9, subfamily a (nhe1, cation proton antiporter 1), member 1, MIF - macrophage migration inhibitory factor (glycosylation-inhibiting factor), ARID5B - at rich interactive domain 5b (mrf1-like), SPOCK1 - sparc/osteonectin, cwcv and kazal-like domains proteoglycan (testican) 1, LYST - ly…
GO:0006813	potassium ion transport	0.00062	0.0747	2.07	23	[KCNK5 - potassium channel, subfamily k, member 5, KCNIP4 - kv channel interacting protein 4, KCNQ5 - potassium voltage-gated channel, kqt-like subfamily, member 5, KCNK1 - potassium channel, subfamily k, member 1, KCNJ16 - potassium inwardly-rectifying channel, subfamily j, member 16, KCNIP1 - kv channel interacting protein 1, KCNJ15 - potassium inwardly-rectifying channel, subfamily j, member 1…
GO:0007167	enzyme linked receptor protein signaling pathway	0.000645	0.0771	1.48	67	[ARHGEF28 - rho guanine nucleotide exchange factor (gef) 28, AP2A1 - adaptor-related protein complex 2, alpha 1 subunit, NCF4 - neutrophil cytosolic factor 4, 40kda, NCBP1 - nuclear cap binding protein subunit 1, 80kda, SYK - spleen tyrosine kinase, FLT3 - fms-related tyrosine kinase 3, LIF - leukemia inhibitory factor, ARID5B - at rich interactive domain 5b (mrf1-like), INHBA - inhibin, beta a, …
GO:0055007	cardiac muscle cell differentiation	0.00065	0.0771	4.35	7	[TBX5 - t-box 5, SLC9A1 - solute carrier family 9, subfamily a (nhe1, cation proton antiporter 1), member 1, NKX2-5 - nk2 homeobox 5, ITGB1 - integrin, beta 1 (fibronectin receptor, beta polypeptide, antigen cd29 includes mdf2, msk12), RXRA - retinoid x receptor, alpha, SOX6 - sry (sex determining region y)-box 6, RARA - retinoic acid receptor, alpha]
GO:0030030	cell projection organization	0.000656	0.0772	1.45	75	[PAX2 - paired box 2, ABLIM1 - actin binding lim protein 1, DSCAM - down syndrome cell adhesion molecule, TRAF3IP1 - tnf receptor-associated factor 3 interacting protein 1, ATP8A2 - atpase, aminophospholipid transporter, class i, type 8a, member 2, CEP164 - centrosomal protein 164kda, STMN3 - stathmin-like 3, SHANK3 - sh3 and multiple ankyrin repeat domains 3, RTN4RL2 - reticulon 4 receptor-like …
GO:0043085	positive regulation of catalytic activity	0.000668	0.078	1.33	117	[NCF4 - neutrophil cytosolic factor 4, 40kda, LMF1 - lipase maturation factor 1, AGAP3 - arfgap with gtpase domain, ankyrin repeat and ph domain 3, FLT3 - fms-related tyrosine kinase 3, PSAP - prosaposin, MIF - macrophage migration inhibitory factor (glycosylation-inhibiting factor), ARHGAP10 - rho gtpase activating protein 10, IQGAP1 - iq motif containing gtpase activating protein 1, LCP2 - lymp…
GO:0001654	eye development	0.00069	0.0799	2.52	15	[SH3PXD2B - sh3 and px domains 2b, VEGFA - vascular endothelial growth factor a, PAX2 - paired box 2, SKI - v-ski avian sarcoma viral oncogene homolog, ADAMTS18 - adam metallopeptidase with thrombospondin type 1 motif, 18, BCL11B - b-cell cll/lymphoma 11b (zinc finger protein), RXRA - retinoid x receptor, alpha, TRAF3IP1 - tnf receptor-associated factor 3 interacting protein 1, FOXP2 - forkhead b…
GO:0022610	biological adhesion	0.000739	0.0849	1.43	78	[DST - dystonin, CRB1 - crumbs homolog 1 (drosophila), PDLIM5 - pdz and lim domain 5, LGALS3BP - lectin, galactoside-binding, soluble, 3 binding protein, SYK - spleen tyrosine kinase, MAEA - macrophage erythroblast attacher, PTPRS - protein tyrosine phosphatase, receptor type, s, DSCAM - down syndrome cell adhesion molecule, SPOCK1 - sparc/osteonectin, cwcv and kazal-like domains proteoglycan (te…
GO:0006357	regulation of transcription by RNA polymerase II	0.00074	0.0843	1.25	175	[PCGF5 - polycomb group ring finger 5, PARK2 - parkinson protein 2, e3 ubiquitin protein ligase (parkin), ZNF202 - zinc finger protein 202, PAX2 - paired box 2, PHF21A - phd finger protein 21a, CRTC3 - creb regulated transcription coactivator 3, HTRA1 - htra serine peptidase 1, PAX5 - paired box 5, KLF12 - kruppel-like factor 12, BRCA1 - breast cancer 1, early onset, ELF4 - e74-like factor 4 (ets…
GO:0009890	negative regulation of biosynthetic process	0.000748	0.0847	1.32	123	[PARK2 - parkinson protein 2, e3 ubiquitin protein ligase (parkin), PAX2 - paired box 2, ZNF202 - zinc finger protein 202, PHF21A - phd finger protein 21a, MAEA - macrophage erythroblast attacher, KLF12 - kruppel-like factor 12, PAX5 - paired box 5, BRCA1 - breast cancer 1, early onset, CBX1 - chromobox homolog 1, FBXO18 - f-box protein, helicase, 18, TSC22D4 - tsc22 domain family, member 4, ELK3…
GO:0009891	positive regulation of biosynthetic process	0.000749	0.0841	1.26	163	[PCGF5 - polycomb group ring finger 5, ZNF341 - zinc finger protein 341, PARK2 - parkinson protein 2, e3 ubiquitin protein ligase (parkin), PAX2 - paired box 2, CASZ1 - castor zinc finger 1, CRTC3 - creb regulated transcription coactivator 3, KLF12 - kruppel-like factor 12, PAX5 - paired box 5, BRCA1 - breast cancer 1, early onset, ELF4 - e74-like factor 4 (ets domain transcription factor), LIF -…
GO:0007009	plasma membrane organization	0.00075	0.0836	2.6	14	[BIN3 - bridging integrator 3, CRB1 - crumbs homolog 1 (drosophila), XKR7 - xk, kell blood group complex subunit-related family, member 7, MTSS1 - metastasis suppressor 1, DYSF - dysferlin, limb girdle muscular dystrophy 2b (autosomal recessive), ANO3 - anoctamin 3, PSAP - prosaposin, XKR6 - xk, kell blood group complex subunit-related family, member 6, EPB41L3 - erythrocyte membrane protein band…
GO:0008360	regulation of cell shape	0.000761	0.0842	2.12	21	[MYO10 - myosin x, CRK - v-crk avian sarcoma virus ct10 oncogene homolog, VEGFA - vascular endothelial growth factor a, SYNE3 - spectrin repeat containing, nuclear envelope family member 3, PALMD - palmdelphin, DAG1 - dystroglycan 1 (dystrophin-associated glycoprotein 1), EPB41L3 - erythrocyte membrane protein band 4.1-like 3, FMNL1 - formin-like 1, PLXNC1 - plexin c1, PLXNA2 - plexin a2, CDC42SE…
GO:0048858	cell projection morphogenesis	0.000769	0.0844	1.87	29	[PAX2 - paired box 2, LRP2 - low density lipoprotein receptor-related protein 2, DSCAM - down syndrome cell adhesion molecule, ATP8A2 - atpase, aminophospholipid transporter, class i, type 8a, member 2, EGFR - epidermal growth factor receptor, SHANK3 - sh3 and multiple ankyrin repeat domains 3, GLI2 - gli family zinc finger 2, NR4A2 - nuclear receptor subfamily 4, group a, member 2, SHANK2 - sh3 …
GO:0050768	negative regulation of neurogenesis	0.000795	0.0867	1.78	33	[LRIG2 - leucine-rich repeats and immunoglobulin-like domains 2, DDX6 - dead (asp-glu-ala-asp) box helicase 6, FGF13 - fibroblast growth factor 13, SLIT2 - slit homolog 2 (drosophila), STAT3 - signal transducer and activator of transcription 3 (acute-phase response factor), PTPRS - protein tyrosine phosphatase, receptor type, s, SPOCK1 - sparc/osteonectin, cwcv and kazal-like domains proteoglycan…
GO:0030517	negative regulation of axon extension	0.000797	0.0863	3.19	10	[SEMA6B - sema domain, transmembrane domain (tm), and cytoplasmic domain, (semaphorin) 6b, NTN1 - netrin 1, SEMA5A - sema domain, seven thrombospondin repeats (type 1 and type 1-like), transmembrane domain (tm) and short cytoplasmic domain, (semaphorin) 5a, SEMA4D - sema domain, immunoglobulin domain (ig), transmembrane domain (tm) and short cytoplasmic domain, (semaphorin) 4d, MAG - myelin assoc…
GO:0030512	negative regulation of transforming growth factor beta receptor signaling pathway	0.0008	0.0859	2.69	13	[SKI - v-ski avian sarcoma viral oncogene homolog, PRDM16 - pr domain containing 16, SNX25 - sorting nexin 25, SMAD2 - smad family member 2, LDLRAD4 - low density lipoprotein receptor class a domain containing 4, HTRA1 - htra serine peptidase 1, ADAMTSL2 - adamts-like 2, ADAM17 - adam metallopeptidase domain 17, SMAD3 - smad family member 3, SMAD6 - smad family member 6, LTBP1 - latent transformi…
GO:0071805	potassium ion transmembrane transport	0.000807	0.086	2.07	22	[KCNK5 - potassium channel, subfamily k, member 5, KCNIP4 - kv channel interacting protein 4, KCNQ5 - potassium voltage-gated channel, kqt-like subfamily, member 5, KCNK1 - potassium channel, subfamily k, member 1, KCNJ16 - potassium inwardly-rectifying channel, subfamily j, member 16, KCNIP1 - kv channel interacting protein 1, KCNJ15 - potassium inwardly-rectifying channel, subfamily j, member 1…
GO:0071804	cellular potassium ion transport	0.000807	0.0854	2.07	22	[KCNK5 - potassium channel, subfamily k, member 5, KCNIP4 - kv channel interacting protein 4, KCNQ5 - potassium voltage-gated channel, kqt-like subfamily, member 5, KCNK1 - potassium channel, subfamily k, member 1, KCNJ16 - potassium inwardly-rectifying channel, subfamily j, member 16, KCNIP1 - kv channel interacting protein 1, KCNJ15 - potassium inwardly-rectifying channel, subfamily j, member 1…
GO:0009653	anatomical structure morphogenesis	0.000852	0.0895	1.32	120	[PAX2 - paired box 2, HTRA1 - htra serine peptidase 1, PAX5 - paired box 5, ABLIM1 - actin binding lim protein 1, STK40 - serine/threonine kinase 40, LIF - leukemia inhibitory factor, ATP8A2 - atpase, aminophospholipid transporter, class i, type 8a, member 2, FLI1 - fli-1 proto-oncogene, ets transcription factor, ASTN2 - astrotactin 2, INHBA - inhibin, beta a, NRP2 - neuropilin 2, FLNB - filamin …
GO:2000113	negative regulation of cellular macromolecule biosynthetic process	0.000862	0.09	1.33	111	[PARK2 - parkinson protein 2, e3 ubiquitin protein ligase (parkin), ZNF202 - zinc finger protein 202, PAX2 - paired box 2, PHF21A - phd finger protein 21a, PAX5 - paired box 5, KLF12 - kruppel-like factor 12, BRCA1 - breast cancer 1, early onset, FBXO18 - f-box protein, helicase, 18, CBX1 - chromobox homolog 1, TSC22D4 - tsc22 domain family, member 4, ELK3 - elk3, ets-domain protein (srf accessor…
GO:0043067	regulation of programmed cell death	0.00091	0.0944	1.31	122	[MCF2L - mcf.2 cell line derived transforming sequence-like, PARK2 - parkinson protein 2, e3 ubiquitin protein ligase (parkin), PAX2 - paired box 2, FLT3 - fms-related tyrosine kinase 3, MAEA - macrophage erythroblast attacher, BRCA1 - breast cancer 1, early onset, STK40 - serine/threonine kinase 40, FBXO18 - f-box protein, helicase, 18, MIF - macrophage migration inhibitory factor (glycosylation…
GO:0045934	negative regulation of nucleobase-containing compound metabolic process	0.000967	0.0996	1.32	116	[PARK2 - parkinson protein 2, e3 ubiquitin protein ligase (parkin), ZNF202 - zinc finger protein 202, PAX2 - paired box 2, PHF21A - phd finger protein 21a, PAX5 - paired box 5, KLF12 - kruppel-like factor 12, BRCA1 - breast cancer 1, early onset, FBXO18 - f-box protein, helicase, 18, CBX1 - chromobox homolog 1, TSC22D4 - tsc22 domain family, member 4, ELK3 - elk3, ets-domain protein (srf accessor…
GO:0009892	negative regulation of metabolic process	0.000975	0.0997	1.22	207	[NCBP1 - nuclear cap binding protein subunit 1, 80kda, PHF21A - phd finger protein 21a, MAEA - macrophage erythroblast attacher, BRCA1 - breast cancer 1, early onset, FBXO18 - f-box protein, helicase, 18, CBX1 - chromobox homolog 1, LIF - leukemia inhibitory factor, SPOCK1 - sparc/osteonectin, cwcv and kazal-like domains proteoglycan (testican) 1, TSC22D4 - tsc22 domain family, member 4, ELK3 - e…
GO:0097035	regulation of membrane lipid distribution	0.000987	0.1	3.11	10	[ATP8B4 - atpase, class i, type 8b, member 4, SLC4A1 - solute carrier family 4 (anion exchanger), member 1, XKR7 - xk, kell blood group complex subunit-related family, member 7, ATP11A - atpase, class vi, type 11a, ANO3 - anoctamin 3, XKR6 - xk, kell blood group complex subunit-related family, member 6, ATP9A - atpase, class ii, type 9a, XKR4 - xk, kell blood group complex subunit-related family,…
GO:0048812	neuron projection morphogenesis	0.000993	0.1	1.86	28	[PAX2 - paired box 2, LRP2 - low density lipoprotein receptor-related protein 2, DSCAM - down syndrome cell adhesion molecule, ATP8A2 - atpase, aminophospholipid transporter, class i, type 8a, member 2, EGFR - epidermal growth factor receptor, GLI2 - gli family zinc finger 2, NR4A2 - nuclear receptor subfamily 4, group a, member 2, SHANK3 - sh3 and multiple ankyrin repeat domains 3, SHANK2 - sh3 …

## Sheet: TableS4D
Table S4D. GO Terms enriched among promoter hypermethylated genes in high stress group
GO Term	Description	P-value	FDR q-value	Enrichment	No. Genes	Genes
GO:0007612	learning	0.000621	1	2.02	24	[PARK2 - parkinson protein 2, e3 ubiquitin protein ligase (parkin), PIAS1 - protein inhibitor of activated stat, 1, PDE1B - phosphodiesterase 1b, calmodulin-dependent, DLG4 - discs, large homolog 4 (drosophila), FGF13 - fibroblast growth factor 13, NDRG4 - ndrg family member 4, SLC7A11 - solute carrier family 7 (anionic amino acid transporter light chain, xc- system), member 11, PPP1R9B - protein…
GO:0006563	L-serine metabolic process	0.000695	1	5.85	5	[PHGDH - phosphoglycerate dehydrogenase, PSPH - phosphoserine phosphatase, SHMT1 - serine hydroxymethyltransferase 1 (soluble), SERINC5 - serine incorporator 5, SHMT2 - serine hydroxymethyltransferase 2 (mitochondrial)]
GO:1901096	regulation of autophagosome maturation	0.000695	1	5.85	5	[UVRAG - uv radiation resistance associated, FYCO1 - fyve and coiled-coil domain containing 1, PHF23 - phd finger protein 23, ADRB2 - adrenoceptor beta 2, surface, UBQLN4 - ubiquilin 4]

## Sheet: TableS4E
Table S4E. GO Terms enriched among promoter hypomethylated genes in high stress group
GO Term	Description	P-value	FDR q-value	Enrichment	No. Genes	Genes
GO:0043300	regulation of leukocyte degranulation	6.23e-05	0.937	5.65	8	[LAMP1 - lysosomal-associated membrane protein 1, IL4R - interleukin 4 receptor, ITGAM - integrin, alpha m (complement component 3 receptor 3 subunit), RAC2 - ras-related c3 botulinum toxin substrate 2 (rho family, small gtp binding protein rac2), GATA2 - gata binding protein 2, PRAM1 - pml-rara regulated adaptor molecule 1, SPHK2 - sphingosine kinase 2, CCR2 - chemokine (c-c motif) receptor 2]
GO:0045321	leukocyte activation	0.000147	1	1.74	47	[CD93 - cd93 molecule, IL18RAP - interleukin 18 receptor accessory protein, BCL11B - b-cell cll/lymphoma 11b (zinc finger protein), ITGAM - integrin, alpha m (complement component 3 receptor 3 subunit), FTL - ferritin, light polypeptide, ITGAL - integrin, alpha l (antigen cd11a (p180), lymphocyte function-associated antigen 1; alpha polypeptide), UBD - ubiquitin d, CMTM7 - cklf-like marvel transm…
GO:0001775	cell activation	0.000256	1	1.66	51	[CD93 - cd93 molecule, IL18RAP - interleukin 18 receptor accessory protein, FTL - ferritin, light polypeptide, GSN - gelsolin, ATP11C - atpase, class vi, type 11c, SEMA4A - sema domain, immunoglobulin domain (ig), transmembrane domain (tm) and short cytoplasmic domain, (semaphorin) 4a, TLR1 - toll-like receptor 1, UNG - uracil-dna glycosylase, ITM2A - integral membrane protein 2a, HDAC5 - histone…
GO:1903305	regulation of regulated secretory pathway	0.000347	1	2.76	15	[IL4R - interleukin 4 receptor, LAMP1 - lysosomal-associated membrane protein 1, FMR1 - fragile x mental retardation 1, ITGAM - integrin, alpha m (complement component 3 receptor 3 subunit), GATA2 - gata binding protein 2, CPLX1 - complexin 1, SPHK2 - sphingosine kinase 2, CCR2 - chemokine (c-c motif) receptor 2, CASK - calcium/calmodulin-dependent serine protein kinase (maguk family), RAC2 - ras…
GO:0010107	potassium ion import	0.000362	1	5.08	7	[SLC12A7 - solute carrier family 12 (potassium/chloride transporter), member 7, KCNJ11 - potassium inwardly-rectifying channel, subfamily j, member 11, SLC12A9 - solute carrier family 12, member 9, ATP12A - atpase, h+/k+ transporting, nongastric, alpha polypeptide, ATP1A1 - atpase, na+/k+ transporting, alpha 1 polypeptide, KCNJ9 - potassium inwardly-rectifying channel, subfamily j, member 9, ATP1…
GO:1990573	potassium ion import across plasma membrane	0.000362	0.907	5.08	7	[SLC12A7 - solute carrier family 12 (potassium/chloride transporter), member 7, KCNJ11 - potassium inwardly-rectifying channel, subfamily j, member 11, SLC12A9 - solute carrier family 12, member 9, ATP12A - atpase, h+/k+ transporting, nongastric, alpha polypeptide, ATP1A1 - atpase, na+/k+ transporting, alpha 1 polypeptide, KCNJ9 - potassium inwardly-rectifying channel, subfamily j, member 9, ATP1…
GO:0002366	leukocyte activation involved in immune response	0.00056	1	1.84	33	[CD93 - cd93 molecule, ITGAM - integrin, alpha m (complement component 3 receptor 3 subunit), FTL - ferritin, light polypeptide, ITGAL - integrin, alpha l (antigen cd11a (p180), lymphocyte function-associated antigen 1; alpha polypeptide), GSN - gelsolin, EPX - eosinophil peroxidase, AZU1 - azurocidin 1, SEMA4A - sema domain, immunoglobulin domain (ig), transmembrane domain (tm) and short cytopla…
GO:0002263	cell activation involved in immune response	0.000605	1	1.83	33	[CD93 - cd93 molecule, ITGAM - integrin, alpha m (complement component 3 receptor 3 subunit), FTL - ferritin, light polypeptide, ITGAL - integrin, alpha l (antigen cd11a (p180), lymphocyte function-associated antigen 1; alpha polypeptide), GSN - gelsolin, EPX - eosinophil peroxidase, AZU1 - azurocidin 1, SEMA4A - sema domain, immunoglobulin domain (ig), transmembrane domain (tm) and short cytopla…
GO:0046339	diacylglycerol metabolic process	0.00068	1	6.69	5	[LIPE - lipase, hormone-sensitive, DGKG - diacylglycerol kinase, gamma 90kda, DGKD - diacylglycerol kinase, delta 130kda, MOGAT2 - monoacylglycerol o-acyltransferase 2, DGKZ - diacylglycerol kinase, zeta]
GO:0043302	positive regulation of leukocyte degranulation	0.000878	1	6.35	5	[IL4R - interleukin 4 receptor, LAMP1 - lysosomal-associated membrane protein 1, ITGAM - integrin, alpha m (complement component 3 receptor 3 subunit), GATA2 - gata binding protein 2, SPHK2 - sphingosine kinase 2]

## Sheet: TableS4F
Table S4F. GO Terms enriched among gene body hypermethylated genes in high stress group
GO Term	Description	P-value	FDR q-value	Enrichment	No. Genes	Genes
GO:0010646	regulation of cell communication	1.33e-08	0.000197	1.31	327	[ZMYND8 - zinc finger, mynd-type containing 8, ARAP1 - arfgap with rhogap domain, ankyrin repeat and ph domain 1, BMP2K - bmp2 inducible kinase, ZFYVE28 - zinc finger, fyve domain containing 28, FBXO18 - f-box protein, helicase, 18, CARD11 - caspase recruitment domain family, member 11, ABL1 - c-abl oncogene 1, non-receptor tyrosine kinase, NCOR2 - nuclear receptor corepressor 2, BST1 - bone marr…
GO:0023051	regulation of signaling	3.07e-08	0.000228	1.3	328	[ZMYND8 - zinc finger, mynd-type containing 8, ARAP1 - arfgap with rhogap domain, ankyrin repeat and ph domain 1, BMP2K - bmp2 inducible kinase, ZFYVE28 - zinc finger, fyve domain containing 28, FBXO18 - f-box protein, helicase, 18, CARD11 - caspase recruitment domain family, member 11, ABL1 - c-abl oncogene 1, non-receptor tyrosine kinase, NCOR2 - nuclear receptor corepressor 2, BST1 - bone marr…
GO:0007165	signal transduction	3.55e-08	0.000175	1.26	378	[ARAP1 - arfgap with rhogap domain, ankyrin repeat and ph domain 1, DST - dystonin, SPTA1 - spectrin, alpha, erythrocytic 1 (elliptocytosis 2), SAMD14 - sterile alpha motif domain containing 14, PLXNC1 - plexin c1, EPG5 - ectopic p-granules autophagy protein 5 homolog (c. elegans), CORO1C - coronin, actin binding protein, 1c, CARD11 - caspase recruitment domain family, member 11, TRPC3 - transien…
GO:0048856	anatomical structure development	1.68e-07	0.000624	1.29	303	[MDGA1 - mam domain containing glycosylphosphatidylinositol anchor 1, SPTA1 - spectrin, alpha, erythrocytic 1 (elliptocytosis 2), CLEC3A - c-type lectin domain family 3, member a, INSC - inscuteable homolog (drosophila), ANKRD11 - ankyrin repeat domain 11, SPOCK1 - sparc/osteonectin, cwcv and kazal-like domains proteoglycan (testican) 1, EML1 - echinoderm microtubule associated protein like 1, PL…
GO:0030155	regulation of cell adhesion	2.39e-07	0.000709	1.73	86	[MDGA1 - mam domain containing glycosylphosphatidylinositol anchor 1, SPTA1 - spectrin, alpha, erythrocytic 1 (elliptocytosis 2), VAV3 - vav 3 guanine nucleotide exchange factor, PLEKHA2 - pleckstrin homology domain containing, family a (phosphoinositide binding specific) member 2, PTPRJ - protein tyrosine phosphatase, receptor type, j, SPOCK1 - sparc/osteonectin, cwcv and kazal-like domains prot…
GO:0032502	developmental process	2.76e-07	0.000682	1.22	419	[MDGA1 - mam domain containing glycosylphosphatidylinositol anchor 1, SPTA1 - spectrin, alpha, erythrocytic 1 (elliptocytosis 2), ABLIM1 - actin binding lim protein 1, SPOCK1 - sparc/osteonectin, cwcv and kazal-like domains proteoglycan (testican) 1, CARD11 - caspase recruitment domain family, member 11, ABL1 - c-abl oncogene 1, non-receptor tyrosine kinase, GCNT2 - glucosaminyl (n-acetyl) transf…
GO:0048518	positive regulation of biological process	5.18e-07	0.0011	1.19	491	[ARAP1 - arfgap with rhogap domain, ankyrin repeat and ph domain 1, ZMYND8 - zinc finger, mynd-type containing 8, PCGF5 - polycomb group ring finger 5, ZNF341 - zinc finger protein 341, BMP2K - bmp2 inducible kinase, SPTA1 - spectrin, alpha, erythrocytic 1 (elliptocytosis 2), FBXO18 - f-box protein, helicase, 18, CORO1C - coronin, actin binding protein, 1c, EPG5 - ectopic p-granules autophagy pro…
GO:0006928	movement of cell or subcellular component	6.08e-07	0.00113	1.48	142	[DST - dystonin, MDGA1 - mam domain containing glycosylphosphatidylinositol anchor 1, RELN - reelin, SPTA1 - spectrin, alpha, erythrocytic 1 (elliptocytosis 2), SPOCK1 - sparc/osteonectin, cwcv and kazal-like domains proteoglycan (testican) 1, CORO1C - coronin, actin binding protein, 1c, ABL1 - c-abl oncogene 1, non-receptor tyrosine kinase, PAK4 - p21 protein (cdc42/rac)-activated kinase 4, DNAA…
GO:0048522	positive regulation of cellular process	1.59e-06	0.00262	1.19	443	[ARAP1 - arfgap with rhogap domain, ankyrin repeat and ph domain 1, ZMYND8 - zinc finger, mynd-type containing 8, PCGF5 - polycomb group ring finger 5, ZNF341 - zinc finger protein 341, BMP2K - bmp2 inducible kinase, SPTA1 - spectrin, alpha, erythrocytic 1 (elliptocytosis 2), FBXO18 - f-box protein, helicase, 18, CORO1C - coronin, actin binding protein, 1c, CARD11 - caspase recruitment domain fam…
GO:0007010	cytoskeleton organization	4.31e-06	0.0064	1.56	98	[DST - dystonin, MAPRE3 - microtubule-associated protein, rp/eb family, member 3, SPECC1 - sperm antigen with calponin homology and coiled-coil domains 1, CAMSAP2 - calmodulin regulated spectrin-associated protein family, member 2, ARHGEF10L - rho guanine nucleotide exchange factor (gef) 10-like, ABLIM1 - actin binding lim protein 1, MID1 - midline 1 (opitz/bbb syndrome), EML1 - echinoderm microt…
GO:0065009	regulation of molecular function	4.58e-06	0.00617	1.28	260	[ARAP1 - arfgap with rhogap domain, ankyrin repeat and ph domain 1, BMP2K - bmp2 inducible kinase, SPTA1 - spectrin, alpha, erythrocytic 1 (elliptocytosis 2), AGAP1 - arfgap with gtpase domain, ankyrin repeat and ph domain 1, ZFYVE28 - zinc finger, fyve domain containing 28, MAPRE3 - microtubule-associated protein, rp/eb family, member 3, FBXO18 - f-box protein, helicase, 18, PLXNC1 - plexin c1, …
GO:0034765	regulation of ion transmembrane transport	6.14e-06	0.00758	1.79	60	[RELN - reelin, OPRM1 - opioid receptor, mu 1, CAPN1 - calpain 1, (mu/i) large subunit, RNF207 - ring finger protein 207, KCNQ4 - potassium voltage-gated channel, kqt-like subfamily, member 4, DPP6 - dipeptidyl-peptidase 6, ABL1 - c-abl oncogene 1, non-receptor tyrosine kinase, SHANK3 - sh3 and multiple ankyrin repeat domains 3, KCNQ3 - potassium voltage-gated channel, kqt-like subfamily, member …
GO:0099177	regulation of trans-synaptic signaling	7.15e-06	0.00815	1.77	61	[SYN1 - synapsin i, ZMYND8 - zinc finger, mynd-type containing 8, GRID2IP - glutamate receptor, ionotropic, delta 2 (grid2) interacting protein, PARK2 - parkinson protein 2, e3 ubiquitin protein ligase (parkin), RELN - reelin, RPL22 - ribosomal protein l22, SORCS2 - sortilin-related vps10 domain containing receptor 2, CAMK2B - calcium/calmodulin-dependent protein kinase ii beta, PICK1 - protein i…
GO:0050804	modulation of chemical synaptic transmission	7.15e-06	0.00757	1.77	61	[SYN1 - synapsin i, ZMYND8 - zinc finger, mynd-type containing 8, GRID2IP - glutamate receptor, ionotropic, delta 2 (grid2) interacting protein, PARK2 - parkinson protein 2, e3 ubiquitin protein ligase (parkin), RELN - reelin, RPL22 - ribosomal protein l22, SORCS2 - sortilin-related vps10 domain containing receptor 2, CAMK2B - calcium/calmodulin-dependent protein kinase ii beta, PICK1 - protein i…
GO:0044093	positive regulation of molecular function	7.18e-06	0.00709	1.37	170	[DHX9 - deah (asp-glu-ala-his) box helicase 9, ARAP1 - arfgap with rhogap domain, ankyrin repeat and ph domain 1, PARK2 - parkinson protein 2, e3 ubiquitin protein ligase (parkin), AGAP1 - arfgap with gtpase domain, ankyrin repeat and ph domain 1, RELN - reelin, SPTA1 - spectrin, alpha, erythrocytic 1 (elliptocytosis 2), MAPRE3 - microtubule-associated protein, rp/eb family, member 3, IKBKG - inh…
GO:0050793	regulation of developmental process	8.52e-06	0.00789	1.29	237	[ZMYND8 - zinc finger, mynd-type containing 8, ARAP1 - arfgap with rhogap domain, ankyrin repeat and ph domain 1, MDGA1 - mam domain containing glycosylphosphatidylinositol anchor 1, BMP2K - bmp2 inducible kinase, SPTA1 - spectrin, alpha, erythrocytic 1 (elliptocytosis 2), PLXNC1 - plexin c1, SPOCK1 - sparc/osteonectin, cwcv and kazal-like domains proteoglycan (testican) 1, PLD6 - phospholipase d…
GO:0009966	regulation of signal transduction	9.41e-06	0.00821	1.25	278	[ZMYND8 - zinc finger, mynd-type containing 8, ARAP1 - arfgap with rhogap domain, ankyrin repeat and ph domain 1, BMP2K - bmp2 inducible kinase, ZFYVE28 - zinc finger, fyve domain containing 28, FBXO18 - f-box protein, helicase, 18, CARD11 - caspase recruitment domain family, member 11, ABL1 - c-abl oncogene 1, non-receptor tyrosine kinase, NCOR2 - nuclear receptor corepressor 2, BST1 - bone marr…
GO:0007411	axon guidance	1.22e-05	0.01	2.02	40	[SPTA1 - spectrin, alpha, erythrocytic 1 (elliptocytosis 2), RELN - reelin, BCL11B - b-cell cll/lymphoma 11b (zinc finger protein), SLIT2 - slit homolog 2 (drosophila), PTCH1 - patched 1, IGSF9 - immunoglobulin superfamily, member 9, NRXN1 - neurexin 1, GLI3 - gli family zinc finger 3, SHANK3 - sh3 and multiple ankyrin repeat domains 3, ENAH - enabled homolog (drosophila), GPC1 - glypican 1, SH3K…
GO:0045664	regulation of neuron differentiation	1.25e-05	0.00978	1.61	80	[TIAM1 - t-cell lymphoma invasion and metastasis 1, ZMYND8 - zinc finger, mynd-type containing 8, PARK2 - parkinson protein 2, e3 ubiquitin protein ligase (parkin), RELN - reelin, CAMSAP2 - calmodulin regulated spectrin-associated protein family, member 2, CAMK1D - calcium/calmodulin-dependent protein kinase id, ZEB1 - zinc finger e-box binding homeobox 1, TCF12 - transcription factor 12, SPOCK1 …
GO:0048869	cellular developmental process	1.36e-05	0.0101	1.27	243	[MDGA1 - mam domain containing glycosylphosphatidylinositol anchor 1, INSC - inscuteable homolog (drosophila), EML1 - echinoderm microtubule associated protein like 1, SPOCK1 - sparc/osteonectin, cwcv and kazal-like domains proteoglycan (testican) 1, PLD6 - phospholipase d family, member 6, CARD11 - caspase recruitment domain family, member 11, ABL1 - c-abl oncogene 1, non-receptor tyrosine kinas…
GO:0050807	regulation of synapse organization	1.41e-05	0.00993	2.1	36	[ZMYND8 - zinc finger, mynd-type containing 8, TIAM1 - t-cell lymphoma invasion and metastasis 1, LRRC4B - leucine rich repeat containing 4b, MDGA1 - mam domain containing glycosylphosphatidylinositol anchor 1, RELN - reelin, GPC6 - glypican 6, IGSF9 - immunoglobulin superfamily, member 9, CAMK2B - calcium/calmodulin-dependent protein kinase ii beta, SEMA4A - sema domain, immunoglobulin domain (i…
GO:0097485	neuron projection guidance	1.7e-05	0.0115	1.99	40	[SPTA1 - spectrin, alpha, erythrocytic 1 (elliptocytosis 2), RELN - reelin, BCL11B - b-cell cll/lymphoma 11b (zinc finger protein), SLIT2 - slit homolog 2 (drosophila), PTCH1 - patched 1, IGSF9 - immunoglobulin superfamily, member 9, NRXN1 - neurexin 1, GLI3 - gli family zinc finger 3, SHANK3 - sh3 and multiple ankyrin repeat domains 3, ENAH - enabled homolog (drosophila), GPC1 - glypican 1, SH3K…
GO:0022610	biological adhesion	1.73e-05	0.0112	1.53	94	[TIAM1 - t-cell lymphoma invasion and metastasis 1, LRRC4B - leucine rich repeat containing 4b, DST - dystonin, RELN - reelin, CRB1 - crumbs homolog 1 (drosophila), COL18A1 - collagen, type xviii, alpha 1, IGSF9 - immunoglobulin superfamily, member 9, SPOCK1 - sparc/osteonectin, cwcv and kazal-like domains proteoglycan (testican) 1, PLXNC1 - plexin c1, PTPRT - protein tyrosine phosphatase, recept…
GO:0031346	positive regulation of cell projection organization	2.15e-05	0.0133	1.79	53	[ZMYND8 - zinc finger, mynd-type containing 8, ARAP1 - arfgap with rhogap domain, ankyrin repeat and ph domain 1, TIAM1 - t-cell lymphoma invasion and metastasis 1, PARK2 - parkinson protein 2, e3 ubiquitin protein ligase (parkin), RELN - reelin, CAMK1D - calcium/calmodulin-dependent protein kinase id, PLXNC1 - plexin c1, FUZ - fuzzy planar cell polarity protein, CAMK2B - calcium/calmodulin-depen…
GO:0045785	positive regulation of cell adhesion	2.19e-05	0.013	1.8	52	[SPTA1 - spectrin, alpha, erythrocytic 1 (elliptocytosis 2), VAV3 - vav 3 guanine nucleotide exchange factor, PLEKHA2 - pleckstrin homology domain containing, family a (phosphoinositide binding specific) member 2, PTPRJ - protein tyrosine phosphatase, receptor type, j, CHRD - chordin, CARD11 - caspase recruitment domain family, member 11, ABL1 - c-abl oncogene 1, non-receptor tyrosine kinase, GCN…
GO:0007155	cell adhesion	2.19e-05	0.0125	1.52	93	[LRRC4B - leucine rich repeat containing 4b, TIAM1 - t-cell lymphoma invasion and metastasis 1, DST - dystonin, RELN - reelin, CRB1 - crumbs homolog 1 (drosophila), COL18A1 - collagen, type xviii, alpha 1, IGSF9 - immunoglobulin superfamily, member 9, SPOCK1 - sparc/osteonectin, cwcv and kazal-like domains proteoglycan (testican) 1, PLXNC1 - plexin c1, PTPRT - protein tyrosine phosphatase, recept…
GO:0065007	biological regulation	2.63e-05	0.0145	1.08	825	[ARAP1 - arfgap with rhogap domain, ankyrin repeat and ph domain 1, BMP2K - bmp2 inducible kinase, AGAP1 - arfgap with gtpase domain, ankyrin repeat and ph domain 1, TMTC2 - transmembrane and tetratricopeptide repeat containing 2, ABL1 - c-abl oncogene 1, non-receptor tyrosine kinase, ABCA4 - atp-binding cassette, sub-family a (abc1), member 4, GCNT2 - glucosaminyl (n-acetyl) transferase 2, i-bra…
l adhesion molecule, EXTL3 - exostosin-like glycosyltransferase 3, LRCH1 - leucine-rich repeats and calponin homology (ch) domain containing 1, VARS - valyl-trna synthetase, VAV2 - vav 2 guanine nucleotide exchange factor, GRAMD4 - gram domain containing 4, CNIH3 - cornichon homolog 3 (drosophila), RANBP9 - ran binding protein 9, NCDN - neurochondrin, DNAJB6 - dnaj (hsp40) homolog, subfamily b, m…
GO:0032879	regulation of localization	2.85e-05	0.0151	1.26	246	[ZMYND8 - zinc finger, mynd-type containing 8, ARAP1 - arfgap with rhogap domain, ankyrin repeat and ph domain 1, BMP2K - bmp2 inducible kinase, PLXNC1 - plexin c1, CORO1C - coronin, actin binding protein, 1c, ABL1 - c-abl oncogene 1, non-receptor tyrosine kinase, TRPC3 - transient receptor potential cation channel, subfamily c, member 3, BST1 - bone marrow stromal cell antigen 1, GCNT2 - glucosa…
GO:0009653	anatomical structure morphogenesis	2.95e-05	0.0151	1.38	142	[RELN - reelin, GCM1 - glial cells missing homolog 1 (drosophila), COL18A1 - collagen, type xviii, alpha 1, ZEB1 - zinc finger e-box binding homeobox 1, ABLIM1 - actin binding lim protein 1, ANKRD11 - ankyrin repeat domain 11, PAX3 - paired box 3, ASTN2 - astrotactin 2, ABL1 - c-abl oncogene 1, non-receptor tyrosine kinase, PBX1 - pre-b-cell leukemia homeobox 1, ZBTB17 - zinc finger and btb domai…
GO:0098609	cell-cell adhesion	2.97e-05	0.0147	1.73	57	[LRRC4B - leucine rich repeat containing 4b, CRB1 - crumbs homolog 1 (drosophila), IGSF9 - immunoglobulin superfamily, member 9, PTPRT - protein tyrosine phosphatase, receptor type, t, VMP1 - vacuole membrane protein 1, WNT7B - wingless-type mmtv integration site family, member 7b, LRFN5 - leucine rich repeat and fibronectin type iii domain containing 5, PAK4 - p21 protein (cdc42/rac)-activated k…
GO:0048167	regulation of synaptic plasticity	3e-05	0.0144	2.16	31	[GRID2IP - glutamate receptor, ionotropic, delta 2 (grid2) interacting protein, RELN - reelin, FGF14 - fibroblast growth factor 14, SORCS2 - sortilin-related vps10 domain containing receptor 2, CAMK2B - calcium/calmodulin-dependent protein kinase ii beta, MECP2 - methyl cpg binding protein 2 (rett syndrome), ABL1 - c-abl oncogene 1, non-receptor tyrosine kinase, PICK1 - protein interacting with p…
GO:0007166	cell surface receptor signaling pathway	3.3e-05	0.0153	1.3	194	[DST - dystonin, PLXNC1 - plexin c1, CARD11 - caspase recruitment domain family, member 11, ABL1 - c-abl oncogene 1, non-receptor tyrosine kinase, GCNT2 - glucosaminyl (n-acetyl) transferase 2, i-branching enzyme (i blood group), CBLC - cbl proto-oncogene c, e3 ubiquitin protein ligase, MAML2 - mastermind-like 2 (drosophila), RELB - v-rel avian reticuloendotheliosis viral oncogene homolog b, SPRE…
GO:0034762	regulation of transmembrane transport	4.06e-05	0.0182	1.64	65	[RELN - reelin, OPRM1 - opioid receptor, mu 1, KCNQ4 - potassium voltage-gated channel, kqt-like subfamily, member 4, CAPN1 - calpain 1, (mu/i) large subunit, RNF207 - ring finger protein 207, DPP6 - dipeptidyl-peptidase 6, ABL1 - c-abl oncogene 1, non-receptor tyrosine kinase, SHANK3 - sh3 and multiple ankyrin repeat domains 3, KCNQ3 - potassium voltage-gated channel, kqt-like subfamily, member …
GO:0030217	T cell differentiation	4.18e-05	0.0182	2.57	21	[CDK6 - cyclin-dependent kinase 6, RPL22 - ribosomal protein l22, BCL11B - b-cell cll/lymphoma 11b (zinc finger protein), GATA3 - gata binding protein 3, RORC - rar-related orphan receptor c, RHOH - ras homolog family member h, PTPN22 - protein tyrosine phosphatase, non-receptor type 22 (lymphoid), CHD7 - chromodomain helicase dna binding protein 7, RUNX2 - runt-related transcription factor 2, TC…
GO:0051094	positive regulation of developmental process	4.8e-05	0.0203	1.38	136	[ZMYND8 - zinc finger, mynd-type containing 8, PARK2 - parkinson protein 2, e3 ubiquitin protein ligase (parkin), RELN - reelin, GCM1 - glial cells missing homolog 1 (drosophila), OPRM1 - opioid receptor, mu 1, ZEB1 - zinc finger e-box binding homeobox 1, TCF12 - transcription factor 12, PLXNC1 - plexin c1, PLD6 - phospholipase d family, member 6, CORO1C - coronin, actin binding protein, 1c, ABL1…
GO:0048870	cell motility	4.83e-05	0.0199	1.48	95	[TIAM1 - t-cell lymphoma invasion and metastasis 1, MDGA1 - mam domain containing glycosylphosphatidylinositol anchor 1, DST - dystonin, RELN - reelin, VAV3 - vav 3 guanine nucleotide exchange factor, SPOCK1 - sparc/osteonectin, cwcv and kazal-like domains proteoglycan (testican) 1, CORO1C - coronin, actin binding protein, 1c, SEMA4A - sema domain, immunoglobulin domain (ig), transmembrane domain…
GO:1900449	regulation of glutamate receptor signaling pathway	4.88e-05	0.0196	3.12	15	[SHISA7 - shisa family member 7, GSG1L - gsg1-like, RELN - reelin, OPRM1 - opioid receptor, mu 1, CAPN1 - calpain 1, (mu/i) large subunit, EPHB2 - eph receptor b2, NETO2 - neuropilin (nrp) and tolloid (tll)-like 2, DAPK1 - death-associated protein kinase 1, SHANK3 - sh3 and multiple ankyrin repeat domains 3, PPARGC1A - peroxisome proliferator-activated receptor gamma, coactivator 1 alpha, MEF2C -…
GO:0045666	positive regulation of neuron differentiation	4.94e-05	0.0193	1.77	50	[ZMYND8 - zinc finger, mynd-type containing 8, TIAM1 - t-cell lymphoma invasion and metastasis 1, PARK2 - parkinson protein 2, e3 ubiquitin protein ligase (parkin), RELN - reelin, CAMK1D - calcium/calmodulin-dependent protein kinase id, ZEB1 - zinc finger e-box binding homeobox 1, TCF12 - transcription factor 12, PLXNC1 - plexin c1, CAMK2B - calcium/calmodulin-dependent protein kinase ii beta, SH…
GO:0045595	regulation of cell differentiation	5.47e-05	0.0208	1.32	172	[ZMYND8 - zinc finger, mynd-type containing 8, PARK2 - parkinson protein 2, e3 ubiquitin protein ligase (parkin), RELN - reelin, GCM1 - glial cells missing homolog 1 (drosophila), OPRM1 - opioid receptor, mu 1, CAMSAP2 - calmodulin regulated spectrin-associated protein family, member 2, ZEB1 - zinc finger e-box binding homeobox 1, TCF12 - transcription factor 12, PLXNC1 - plexin c1, SPOCK1 - spar…
GO:0120035	regulation of plasma membrane bounded cell projection organization	5.47e-05	0.0203	1.54	80	[TIAM1 - t-cell lymphoma invasion and metastasis 1, ARAP1 - arfgap with rhogap domain, ankyrin repeat and ph domain 1, ZMYND8 - zinc finger, mynd-type containing 8, PARK2 - parkinson protein 2, e3 ubiquitin protein ligase (parkin), RELN - reelin, CAMSAP2 - calmodulin regulated spectrin-associated protein family, member 2, CAMK1D - calcium/calmodulin-dependent protein kinase id, FUZ - fuzzy planar…
GO:0048583	regulation of response to stimulus	5.59e-05	0.0202	1.19	342	[ARAP1 - arfgap with rhogap domain, ankyrin repeat and ph domain 1, ZMYND8 - zinc finger, mynd-type containing 8, BMP2K - bmp2 inducible kinase, ZFYVE28 - zinc finger, fyve domain containing 28, FBXO18 - f-box protein, helicase, 18, EPG5 - ectopic p-granules autophagy protein 5 homolog (c. elegans), CARD11 - caspase recruitment domain family, member 11, TRPC3 - transient receptor potential cation…
GO:0022603	regulation of anatomical structure morphogenesis	6.04e-05	0.0213	1.42	112	[ARAP1 - arfgap with rhogap domain, ankyrin repeat and ph domain 1, PARK2 - parkinson protein 2, e3 ubiquitin protein ligase (parkin), RELN - reelin, GCM1 - glial cells missing homolog 1 (drosophila), SPTA1 - spectrin, alpha, erythrocytic 1 (elliptocytosis 2), PLD6 - phospholipase d family, member 6, PLXNC1 - plexin c1, LINGO1 - leucine rich repeat and ig domain containing 1, CORO1C - coronin, ac…
GO:0048513	animal organ development	6.06e-05	0.0209	1.39	125	[MDGA1 - mam domain containing glycosylphosphatidylinositol anchor 1, RELN - reelin, SPTA1 - spectrin, alpha, erythrocytic 1 (elliptocytosis 2), ZEB1 - zinc finger e-box binding homeobox 1, TCF12 - transcription factor 12, PAX3 - paired box 3, ANKRD11 - ankyrin repeat domain 11, EML1 - echinoderm microtubule associated protein like 1, TTC7A - tetratricopeptide repeat domain 7a, ABL1 - c-abl oncog…
GO:0045597	positive regulation of cell differentiation	6.11e-05	0.0206	1.45	104	[ZMYND8 - zinc finger, mynd-type containing 8, PARK2 - parkinson protein 2, e3 ubiquitin protein ligase (parkin), RELN - reelin, OPRM1 - opioid receptor, mu 1, ZEB1 - zinc finger e-box binding homeobox 1, TCF12 - transcription factor 12, PLXNC1 - plexin c1, ABL1 - c-abl oncogene 1, non-receptor tyrosine kinase, GCNT2 - glucosaminyl (n-acetyl) transferase 2, i-branching enzyme (i blood group), CDO…
GO:2000026	regulation of multicellular organismal development	6.25e-05	0.0206	1.29	191	[ZMYND8 - zinc finger, mynd-type containing 8, BMP2K - bmp2 inducible kinase, PARK2 - parkinson protein 2, e3 ubiquitin protein ligase (parkin), MDGA1 - mam domain containing glycosylphosphatidylinositol anchor 1, GCM1 - glial cells missing homolog 1 (drosophila), RELN - reelin, OPRM1 - opioid receptor, mu 1, CAMSAP2 - calmodulin regulated spectrin-associated protein family, member 2, ZEB1 - zinc…
GO:0098698	postsynaptic specialization assembly	6.76e-05	0.0218	11.02	4	[SHANK3 - sh3 and multiple ankyrin repeat domains 3, NTNG2 - netrin g2, SHANK2 - sh3 and multiple ankyrin repeat domains 2, NLGN1 - neuroligin 1]
GO:0007162	negative regulation of cell adhesion	7.11e-05	0.0224	1.91	38	[ADAMTS18 - adam metallopeptidase with thrombospondin type 1 motif, 18, PLXNC1 - plexin c1, SPOCK1 - sparc/osteonectin, cwcv and kazal-like domains proteoglycan (testican) 1, CORO1C - coronin, actin binding protein, 1c, SH2B3 - sh2b adaptor protein 3, LOXL3 - lysyl oxidase-like 3, GLI3 - gli family zinc finger 3, ABL1 - c-abl oncogene 1, non-receptor tyrosine kinase, GCNT2 - glucosaminyl (n-acety…
GO:0031344	regulation of cell projection organization	7.84e-05	0.0242	1.52	80	[TIAM1 - t-cell lymphoma invasion and metastasis 1, ARAP1 - arfgap with rhogap domain, ankyrin repeat and ph domain 1, ZMYND8 - zinc finger, mynd-type containing 8, PARK2 - parkinson protein 2, e3 ubiquitin protein ligase (parkin), RELN - reelin, CAMSAP2 - calmodulin regulated spectrin-associated protein family, member 2, CAMK1D - calcium/calmodulin-dependent protein kinase id, FUZ - fuzzy planar…
GO:0048731	system development	8.27e-05	0.025	1.53	78	[PARK2 - parkinson protein 2, e3 ubiquitin protein ligase (parkin), RELN - reelin, ZNF423 - zinc finger protein 423, CLEC3A - c-type lectin domain family 3, member a, ZEB1 - zinc finger e-box binding homeobox 1, INSC - inscuteable homolog (drosophila), PAX3 - paired box 3, FBXW7 - f-box and wd repeat domain containing 7, e3 ubiquitin protein ligase, SPOCK1 - sparc/osteonectin, cwcv and kazal-like…
GO:0032501	multicellular organismal process	8.29e-05	0.0246	1.22	278	[CLEC3A - c-type lectin domain family 3, member a, PNLIPRP2 - pancreatic lipase-related protein 2, ABLIM1 - actin binding lim protein 1, ANKRD11 - ankyrin repeat domain 11, ABL1 - c-abl oncogene 1, non-receptor tyrosine kinase, ABCA4 - atp-binding cassette, sub-family a (abc1), member 4, GCNT2 - glucosaminyl (n-acetyl) transferase 2, i-branching enzyme (i blood group), HRH2 - histamine receptor h…
GO:0072358	cardiovascular system development	8.42e-05	0.0245	6.61	6	[ABL1 - c-abl oncogene 1, non-receptor tyrosine kinase, MYLK - myosin light chain kinase, CRB2 - crumbs homolog 2 (drosophila), KCNQ1 - potassium voltage-gated channel, kqt-like subfamily, member 1, HSPG2 - heparan sulfate proteoglycan 2, NXN - nucleoredoxin]
GO:0030098	lymphocyte differentiation	8.55e-05	0.0244	2.08	30	[MSH2 - muts homolog 2, colon cancer, nonpolyposis type 1 (e. coli), RPL22 - ribosomal protein l22, BCL11B - b-cell cll/lymphoma 11b (zinc finger protein), RHOH - ras homolog family member h, PTPRJ - protein tyrosine phosphatase, receptor type, j, CARD11 - caspase recruitment domain family, member 11, SEMA4A - sema domain, immunoglobulin domain (ig), transmembrane domain (tm) and short cytoplasmi…
GO:0016477	cell migration	9.25e-05	0.0259	1.49	86	[TIAM1 - t-cell lymphoma invasion and metastasis 1, MDGA1 - mam domain containing glycosylphosphatidylinositol anchor 1, RELN - reelin, VAV3 - vav 3 guanine nucleotide exchange factor, SPOCK1 - sparc/osteonectin, cwcv and kazal-like domains proteoglycan (testican) 1, CORO1C - coronin, actin binding protein, 1c, SEMA4A - sema domain, immunoglobulin domain (ig), transmembrane domain (tm) and short …
GO:0045668	negative regulation of osteoblast differentiation	9.73e-05	0.0267	3.67	11	[CDK6 - cyclin-dependent kinase 6, SEMA4D - sema domain, immunoglobulin domain (ig), transmembrane domain (tm) and short cytoplasmic domain, (semaphorin) 4d, HDAC4 - histone deacetylase 4, SFRP1 - secreted frizzled-related protein 1, SKI - v-ski avian sarcoma viral oncogene homolog, RORB - rar-related orphan receptor b, PTCH1 - patched 1, IGFBP5 - insulin-like growth factor binding protein 5, NOT…
GO:0046632	alpha-beta T cell differentiation	9.73e-05	0.0262	3.67	11	[TCF7 - transcription factor 7 (t-cell specific, hmg-box), SEMA4A - sema domain, immunoglobulin domain (ig), transmembrane domain (tm) and short cytoplasmic domain, (semaphorin) 4a, ABL1 - c-abl oncogene 1, non-receptor tyrosine kinase, SATB1 - satb homeobox 1, BCL11B - b-cell cll/lymphoma 11b (zinc finger protein), RPL22 - ribosomal protein l22, RORC - rar-related orphan receptor c, GATA3 - gata…
GO:0030279	negative regulation of ossification	9.86e-05	0.0261	3.08	14	[CDK6 - cyclin-dependent kinase 6, HDAC4 - histone deacetylase 4, SFRP1 - secreted frizzled-related protein 1, SKI - v-ski avian sarcoma viral oncogene homolog, RORB - rar-related orphan receptor b, PTCH1 - patched 1, IGFBP5 - insulin-like growth factor binding protein 5, LRP5 - low density lipoprotein receptor-related protein 5, SMURF1 - smad specific e3 ubiquitin protein ligase 1, CHRD - chordi…
GO:0042127	regulation of cell proliferation	9.93e-05	0.0258	1.34	149	[DHX9 - deah (asp-glu-ala-his) box helicase 9, SPTA1 - spectrin, alpha, erythrocytic 1 (elliptocytosis 2), OPRM1 - opioid receptor, mu 1, COL18A1 - collagen, type xviii, alpha 1, ZEB1 - zinc finger e-box binding homeobox 1, CARD11 - caspase recruitment domain family, member 11, ABL1 - c-abl oncogene 1, non-receptor tyrosine kinase, PBX1 - pre-b-cell leukemia homeobox 1, BST1 - bone marrow stromal…
GO:0050853	B cell receptor signaling pathway	0.000104	0.0267	3.93	10	[ABL1 - c-abl oncogene 1, non-receptor tyrosine kinase, VAV3 - vav 3 guanine nucleotide exchange factor, TRDC - t cell receptor delta constant, MEF2C - myocyte enhancer factor 2c, PRKCB - protein kinase c, beta, RFTN1 - raftlin, lipid raft linker 1, ITK - il2-inducible t-cell kinase, BLK - b lymphoid tyrosine kinase, PTPRC - protein tyrosine phosphatase, receptor type, c, NFATC2 - nuclear factor …
GO:0045667	regulation of osteoblast differentiation	0.000111	0.0278	2.48	20	[CDK6 - cyclin-dependent kinase 6, SFRP1 - secreted frizzled-related protein 1, HDAC4 - histone deacetylase 4, SKI - v-ski avian sarcoma viral oncogene homolog, RORB - rar-related orphan receptor b, ZHX3 - zinc fingers and homeoboxes 3, PDLIM7 - pdz and lim domain 7 (enigma), GNAS - gnas complex locus, PTCH1 - patched 1, IGFBP5 - insulin-like growth factor binding protein 5, RUNX2 - runt-related …
GO:0051960	regulation of nervous system development	0.000112	0.0276	1.44	100	[ZMYND8 - zinc finger, mynd-type containing 8, PARK2 - parkinson protein 2, e3 ubiquitin protein ligase (parkin), MDGA1 - mam domain containing glycosylphosphatidylinositol anchor 1, RELN - reelin, OPRM1 - opioid receptor, mu 1, CAMSAP2 - calmodulin regulated spectrin-associated protein family, member 2, ZEB1 - zinc finger e-box binding homeobox 1, TCF12 - transcription factor 12, SPOCK1 - sparc/…
GO:0040011	locomotion	0.000116	0.0282	1.43	101	[DST - dystonin, MDGA1 - mam domain containing glycosylphosphatidylinositol anchor 1, RELN - reelin, SPOCK1 - sparc/osteonectin, cwcv and kazal-like domains proteoglycan (testican) 1, CORO1C - coronin, actin binding protein, 1c, ABL1 - c-abl oncogene 1, non-receptor tyrosine kinase, DNAAF2 - dynein, axonemal, assembly factor 2, PAK4 - p21 protein (cdc42/rac)-activated kinase 4, BTG1 - b-cell tran…
GO:0032989	cellular component morphogenesis	0.000117	0.0279	1.64	57	[RELN - reelin, ABI1 - abl-interactor 1, COL18A1 - collagen, type xviii, alpha 1, SEMA4A - sema domain, immunoglobulin domain (ig), transmembrane domain (tm) and short cytoplasmic domain, (semaphorin) 4a, ABL1 - c-abl oncogene 1, non-receptor tyrosine kinase, WNT7B - wingless-type mmtv integration site family, member 7b, SHANK3 - sh3 and multiple ankyrin repeat domains 3, HRH2 - histamine recepto…
GO:0042326	negative regulation of phosphorylation	0.000137	0.0322	1.67	53	[PARK2 - parkinson protein 2, e3 ubiquitin protein ligase (parkin), ZFYVE28 - zinc finger, fyve domain containing 28, ZMYND11 - zinc finger, mynd-type containing 11, PTPRJ - protein tyrosine phosphatase, receptor type, j, CORO1C - coronin, actin binding protein, 1c, SH2B3 - sh2b adaptor protein 3, ABL1 - c-abl oncogene 1, non-receptor tyrosine kinase, MAPT - microtubule-associated protein tau, SE…
GO:0051239	regulation of multicellular organismal process	0.000152	0.0352	1.21	269	[ZMYND8 - zinc finger, mynd-type containing 8, MDGA1 - mam domain containing glycosylphosphatidylinositol anchor 1, BMP2K - bmp2 inducible kinase, PLXNC1 - plexin c1, SPOCK1 - sparc/osteonectin, cwcv and kazal-like domains proteoglycan (testican) 1, LINGO1 - leucine rich repeat and ig domain containing 1, CORO1C - coronin, actin binding protein, 1c, CARD11 - caspase recruitment domain family, mem…
GO:0072657	protein localization to membrane	0.000165	0.0376	1.67	52	[TIAM1 - t-cell lymphoma invasion and metastasis 1, RELN - reelin, RPL22 - ribosomal protein l22, MICALL1 - mical-like 1, VPS37C - vacuolar protein sorting 37 homolog c (s. cerevisiae), TTC7A - tetratricopeptide repeat domain 7a, DPP6 - dipeptidyl-peptidase 6, PICK1 - protein interacting with prkca 1, RPL7A - ribosomal protein l7a, SHANK3 - sh3 and multiple ankyrin repeat domains 3, LIN7A - lin-7…
GO:0051962	positive regulation of nervous system development	0.000165	0.0371	1.57	64	[LRRC4B - leucine rich repeat containing 4b, TIAM1 - t-cell lymphoma invasion and metastasis 1, ZMYND8 - zinc finger, mynd-type containing 8, PARK2 - parkinson protein 2, e3 ubiquitin protein ligase (parkin), RELN - reelin, OPRM1 - opioid receptor, mu 1, CAMK1D - calcium/calmodulin-dependent protein kinase id, ZEB1 - zinc finger e-box binding homeobox 1, TCF12 - transcription factor 12, PLXNC1 - …
GO:0009887	animal organ morphogenesis	0.000177	0.0391	1.6	60	[COL18A1 - collagen, type xviii, alpha 1, ZEB1 - zinc finger e-box binding homeobox 1, ABLIM1 - actin binding lim protein 1, PAX3 - paired box 3, ANKRD11 - ankyrin repeat domain 11, FUZ - fuzzy planar cell polarity protein, SHANK3 - sh3 and multiple ankyrin repeat domains 3, WNT7B - wingless-type mmtv integration site family, member 7b, SEMA6A - sema domain, transmembrane domain (tm), and cytopla…
GO:0010769	regulation of cell morphogenesis involved in differentiation	0.000192	0.0418	1.77	42	[TIAM1 - t-cell lymphoma invasion and metastasis 1, RELN - reelin, CRK - v-crk avian sarcoma virus ct10 oncogene homolog, FGF13 - fibroblast growth factor 13, ANKRD27 - ankyrin repeat domain 27 (vps9 domain), SLIT2 - slit homolog 2 (drosophila), NEDD9 - neural precursor cell expressed, developmentally down-regulated 9, PLXNC1 - plexin c1, CAMK2B - calcium/calmodulin-dependent protein kinase ii be…
GO:0050769	positive regulation of neurogenesis	0.000194	0.0418	1.61	58	[TIAM1 - t-cell lymphoma invasion and metastasis 1, ZMYND8 - zinc finger, mynd-type containing 8, PARK2 - parkinson protein 2, e3 ubiquitin protein ligase (parkin), RELN - reelin, OPRM1 - opioid receptor, mu 1, CAMK1D - calcium/calmodulin-dependent protein kinase id, ZEB1 - zinc finger e-box binding homeobox 1, TCF12 - transcription factor 12, PLXNC1 - plexin c1, CAMK2B - calcium/calmodulin-depen…
GO:0008285	negative regulation of cell proliferation	0.000198	0.0419	1.51	73	[OPRM1 - opioid receptor, mu 1, ABI1 - abl-interactor 1, COL18A1 - collagen, type xviii, alpha 1, ZEB1 - zinc finger e-box binding homeobox 1, FBXW7 - f-box and wd repeat domain containing 7, e3 ubiquitin protein ligase, PTPRJ - protein tyrosine phosphatase, receptor type, j, FUZ - fuzzy planar cell polarity protein, SH2B3 - sh2b adaptor protein 3, ZBTB17 - zinc finger and btb domain containing 1…
GO:0010770	positive regulation of cell morphogenesis involved in differentiation	0.000199	0.0415	2.11	26	[TIAM1 - t-cell lymphoma invasion and metastasis 1, RELN - reelin, CRK - v-crk avian sarcoma virus ct10 oncogene homolog, ANKRD27 - ankyrin repeat domain 27 (vps9 domain), SLIT2 - slit homolog 2 (drosophila), PLXNC1 - plexin c1, NEDD9 - neural precursor cell expressed, developmentally down-regulated 9, CAMK2B - calcium/calmodulin-dependent protein kinase ii beta, ABL1 - c-abl oncogene 1, non-rece…
GO:0006468	protein phosphorylation	0.0002	0.0413	1.41	100	[BMP2K - bmp2 inducible kinase, SPTA1 - spectrin, alpha, erythrocytic 1 (elliptocytosis 2), RELN - reelin, IKBKG - inhibitor of kappa light polypeptide gene enhancer in b-cells, kinase gamma, ABL1 - c-abl oncogene 1, non-receptor tyrosine kinase, PAK4 - p21 protein (cdc42/rac)-activated kinase 4, KSR1 - kinase suppressor of ras 1, P2RX7 - purinergic receptor p2x, ligand-gated ion channel, 7, BRSK…
GO:0016310	phosphorylation	0.000203	0.0412	1.37	118	[BMP2K - bmp2 inducible kinase, RELN - reelin, SPTA1 - spectrin, alpha, erythrocytic 1 (elliptocytosis 2), IKBKG - inhibitor of kappa light polypeptide gene enhancer in b-cells, kinase gamma, CIITA - class ii, major histocompatibility complex, transactivator, TTC7A - tetratricopeptide repeat domain 7a, ABL1 - c-abl oncogene 1, non-receptor tyrosine kinase, PAK4 - p21 protein (cdc42/rac)-activated…
GO:0010975	regulation of neuron projection development	0.000208	0.0417	1.57	62	[TIAM1 - t-cell lymphoma invasion and metastasis 1, ZMYND8 - zinc finger, mynd-type containing 8, PARK2 - parkinson protein 2, e3 ubiquitin protein ligase (parkin), RELN - reelin, CAMSAP2 - calmodulin regulated spectrin-associated protein family, member 2, CAMK1D - calcium/calmodulin-dependent protein kinase id, SPOCK1 - sparc/osteonectin, cwcv and kazal-like domains proteoglycan (testican) 1, PL…
GO:0001764	neuron migration	0.000209	0.0413	2.31	21	[MDGA1 - mam domain containing glycosylphosphatidylinositol anchor 1, RELN - reelin, KIRREL3 - kin of irre like 3 (drosophila), CRK - v-crk avian sarcoma virus ct10 oncogene homolog, FGF13 - fibroblast growth factor 13, GATA3 - gata binding protein 3, FGFR1 - fibroblast growth factor receptor 1, NDEL1 - nude neurodevelopment protein 1-like 1, SPOCK1 - sparc/osteonectin, cwcv and kazal-like domain…
GO:0051130	positive regulation of cellular component organization	0.000228	0.0444	1.35	124	[ARAP1 - arfgap with rhogap domain, ankyrin repeat and ph domain 1, ZMYND8 - zinc finger, mynd-type containing 8, PARK2 - parkinson protein 2, e3 ubiquitin protein ligase (parkin), RELN - reelin, GCM1 - glial cells missing homolog 1 (drosophila), PARN - poly(a)-specific ribonuclease, ARHGEF10L - rho guanine nucleotide exchange factor (gef) 10-like, PLD6 - phospholipase d family, member 6, PLXNC1 …
GO:0007269	neurotransmitter secretion	0.00025	0.0482	2.98	13	[SYN1 - synapsin i, SLC6A9 - solute carrier family 6 (neurotransmitter transporter, glycine), member 9, DGKI - diacylglycerol kinase, iota, BRSK1 - br serine/threonine kinase 1, PTPRN2 - protein tyrosine phosphatase, receptor type, n polypeptide 2, PPFIA3 - protein tyrosine phosphatase, receptor type, f polypeptide (ptprf), interacting protein (liprin), alpha 3, NRXN1 - neurexin 1, DOC2B - double…
GO:0007009	plasma membrane organization	0.000251	0.0478	2.63	16	[SPTA1 - spectrin, alpha, erythrocytic 1 (elliptocytosis 2), CRB1 - crumbs homolog 1 (drosophila), P2RX7 - purinergic receptor p2x, ligand-gated ion channel, 7, TLCD2 - tlc domain containing 2, MICALL1 - mical-like 1, BAIAP2L1 - bai1-associated protein 2-like 1, DYSF - dysferlin, limb girdle muscular dystrophy 2b (autosomal recessive), PSAP - prosaposin, XKR6 - xk, kell blood group complex subuni…
GO:0030278	regulation of ossification	0.000267	0.05	2.04	27	[BMP2K - bmp2 inducible kinase, OSR1 - odd-skipped related 1 (drosophila), PTCH1 - patched 1, LRP5 - low density lipoprotein receptor-related protein 5, CHRD - chordin, GLI3 - gli family zinc finger 3, PBX1 - pre-b-cell leukemia homeobox 1, WNT7B - wingless-type mmtv integration site family, member 7b, MEF2C - myocyte enhancer factor 2c, PTK2 - protein tyrosine kinase 2, NOTCH1 - notch 1, ZBTB16 …
GO:0010720	positive regulation of cell development	0.000273	0.0506	1.55	64	[TIAM1 - t-cell lymphoma invasion and metastasis 1, ZMYND8 - zinc finger, mynd-type containing 8, PARK2 - parkinson protein 2, e3 ubiquitin protein ligase (parkin), RELN - reelin, OPRM1 - opioid receptor, mu 1, CAMK1D - calcium/calmodulin-dependent protein kinase id, ZEB1 - zinc finger e-box binding homeobox 1, TCF12 - transcription factor 12, PLXNC1 - plexin c1, CAMK2B - calcium/calmodulin-depen…
GO:0048858	cell projection morphogenesis	0.000275	0.0503	1.88	33	[ABI1 - abl-interactor 1, ANKRD27 - ankyrin repeat domain 27 (vps9 domain), SEMA4A - sema domain, immunoglobulin domain (ig), transmembrane domain (tm) and short cytoplasmic domain, (semaphorin) 4a, EGFR - epidermal growth factor receptor, WNT7B - wingless-type mmtv integration site family, member 7b, ADARB1 - adenosine deaminase, rna-specific, b1, SHANK3 - sh3 and multiple ankyrin repeat domains…
GO:0051049	regulation of transport	0.0003	0.0543	1.28	167	[DHX9 - deah (asp-glu-ala-his) box helicase 9, PARK2 - parkinson protein 2, e3 ubiquitin protein ligase (parkin), BMP2K - bmp2 inducible kinase, RELN - reelin, OPRM1 - opioid receptor, mu 1, TRPC3 - transient receptor potential cation channel, subfamily c, member 3, ABL1 - c-abl oncogene 1, non-receptor tyrosine kinase, LMAN2 - lectin, mannose-binding 2, ABR - active bcr-related, SHANK2 - sh3 and…
GO:2000311	regulation of AMPA receptor activity	0.000312	0.0557	4.2	8	[GSG1L - gsg1-like, SHISA7 - shisa family member 7, RELN - reelin, SHANK3 - sh3 and multiple ankyrin repeat domains 3, MEF2C - myocyte enhancer factor 2c, SHANK2 - sh3 and multiple ankyrin repeat domains 2, CNIH3 - cornichon homolog 3 (drosophila), NLGN1 - neuroligin 1]
GO:0045794	negative regulation of cell volume	0.000313	0.0553	8.81	4	[CLCN3 - chloride channel, voltage-sensitive 3, P2RX7 - purinergic receptor p2x, ligand-gated ion channel, 7, SHANK3 - sh3 and multiple ankyrin repeat domains 3, KCNMA1 - potassium large conductance calcium-activated channel, subfamily m, alpha member 1]
GO:0048812	neuron projection morphogenesis	0.000333	0.058	1.89	32	[ABI1 - abl-interactor 1, ANKRD27 - ankyrin repeat domain 27 (vps9 domain), SEMA4A - sema domain, immunoglobulin domain (ig), transmembrane domain (tm) and short cytoplasmic domain, (semaphorin) 4a, EGFR - epidermal growth factor receptor, ADARB1 - adenosine deaminase, rna-specific, b1, WNT7B - wingless-type mmtv integration site family, member 7b, SHANK3 - sh3 and multiple ankyrin repeat domains…
GO:0001933	negative regulation of protein phosphorylation	0.000348	0.0599	1.65	48	[PRKAG2 - protein kinase, amp-activated, gamma 2 non-catalytic subunit, PARK2 - parkinson protein 2, e3 ubiquitin protein ligase (parkin), ZFYVE28 - zinc finger, fyve domain containing 28, LDLRAD4 - low density lipoprotein receptor class a domain containing 4, SLIT2 - slit homolog 2 (drosophila), PTPRJ - protein tyrosine phosphatase, receptor type, j, ZMYND11 - zinc finger, mynd-type containing 1…
GO:1904062	regulation of cation transmembrane transport	0.000361	0.0615	1.74	40	[GSG1L - gsg1-like, RELN - reelin, OPRM1 - opioid receptor, mu 1, OSR1 - odd-skipped related 1 (drosophila), FGF14 - fibroblast growth factor 14, RNF207 - ring finger protein 207, CAPN1 - calpain 1, (mu/i) large subunit, DYSF - dysferlin, limb girdle muscular dystrophy 2b (autosomal recessive), DPP6 - dipeptidyl-peptidase 6, ABL1 - c-abl oncogene 1, non-receptor tyrosine kinase, SHANK3 - sh3 and …
GO:0032412	regulation of ion transmembrane transporter activity	0.000367	0.0618	1.88	32	[GSG1L - gsg1-like, RELN - reelin, OPRM1 - opioid receptor, mu 1, OSR1 - odd-skipped related 1 (drosophila), FGF14 - fibroblast growth factor 14, CAPN1 - calpain 1, (mu/i) large subunit, RNF207 - ring finger protein 207, DYSF - dysferlin, limb girdle muscular dystrophy 2b (autosomal recessive), PPARGC1A - peroxisome proliferator-activated receptor gamma, coactivator 1 alpha, SHANK3 - sh3 and mult…
GO:0030030	cell projection organization	0.00039	0.065	1.44	84	[RELN - reelin, VAV3 - vav 3 guanine nucleotide exchange factor, TSGA10IP - testis specific, 10 interacting protein, ABI1 - abl-interactor 1, ARMC9 - armadillo repeat containing 9, MICALL1 - mical-like 1, CAMSAP2 - calmodulin regulated spectrin-associated protein family, member 2, TMEM138 - transmembrane protein 138, ABLIM1 - actin binding lim protein 1, SAMD14 - sterile alpha motif domain contai…
GO:0010976	positive regulation of neuron projection development	0.000402	0.0662	1.75	39	[TIAM1 - t-cell lymphoma invasion and metastasis 1, ZMYND8 - zinc finger, mynd-type containing 8, PARK2 - parkinson protein 2, e3 ubiquitin protein ligase (parkin), RELN - reelin, ANKRD27 - ankyrin repeat domain 27 (vps9 domain), FGFR1 - fibroblast growth factor receptor 1, CAMK1D - calcium/calmodulin-dependent protein kinase id, ROR1 - receptor tyrosine kinase-like orphan receptor 1, AVIL - advi…
GO:0002429	immune response-activating cell surface receptor signaling pathway	0.000428	0.0697	1.79	36	[CRK - v-crk avian sarcoma virus ct10 oncogene homolog, VAV3 - vav 3 guanine nucleotide exchange factor, TRDC - t cell receptor delta constant, ABI1 - abl-interactor 1, ICAM2 - intercellular adhesion molecule 2, IKBKG - inhibitor of kappa light polypeptide gene enhancer in b-cells, kinase gamma, PTPRJ - protein tyrosine phosphatase, receptor type, j, CARD11 - caspase recruitment domain family, me…
GO:0045944	positive regulation of transcription by RNA polymerase II	0.000436	0.0702	1.34	119	[DHX9 - deah (asp-glu-ala-his) box helicase 9, PARK2 - parkinson protein 2, e3 ubiquitin protein ligase (parkin), PCGF5 - polycomb group ring finger 5, GCM1 - glial cells missing homolog 1 (drosophila), IKBKG - inhibitor of kappa light polypeptide gene enhancer in b-cells, kinase gamma, CIITA - class ii, major histocompatibility complex, transactivator, CRTC3 - creb regulated transcription coacti…
GO:0061138	morphogenesis of a branching epithelium	0.000436	0.0696	2.11	23	[PKD1 - polycystic kidney disease 1 (autosomal dominant), SFRP1 - secreted frizzled-related protein 1, GCM1 - glial cells missing homolog 1 (drosophila), PLXND1 - plexin d1, GPC3 - glypican 3, SOX10 - sry (sex determining region y)-box 10, FGFR1 - fibroblast growth factor receptor 1, TGM2 - transglutaminase 2, SLIT2 - slit homolog 2 (drosophila), PTCH1 - patched 1, LRP5 - low density lipoprotein …
GO:0120039	plasma membrane bounded cell projection morphogenesis	0.000445	0.0702	1.86	32	[ABI1 - abl-interactor 1, ANKRD27 - ankyrin repeat domain 27 (vps9 domain), SEMA4A - sema domain, immunoglobulin domain (ig), transmembrane domain (tm) and short cytoplasmic domain, (semaphorin) 4a, EGFR - epidermal growth factor receptor, ADARB1 - adenosine deaminase, rna-specific, b1, SHANK3 - sh3 and multiple ankyrin repeat domains 3, WNT7B - wingless-type mmtv integration site family, member …
GO:0009888	tissue development	0.000467	0.0729	1.5	67	[WDR72 - wd repeat domain 72, KLK7 - kallikrein-related peptidase 7, LOXL3 - lysyl oxidase-like 3, MTHFD1 - methylenetetrahydrofolate dehydrogenase (nadp+ dependent) 1, methenyltetrahydrofolate cyclohydrolase, formyltetrahydrofolate synthetase, ZBTB17 - zinc finger and btb domain containing 17, WNT7B - wingless-type mmtv integration site family, member 7b, EIF2AK3 - eukaryotic translation initiat…
GO:0048585	negative regulation of response to stimulus	0.000479	0.0739	1.29	150	[PARK2 - parkinson protein 2, e3 ubiquitin protein ligase (parkin), OPRM1 - opioid receptor, mu 1, ZFYVE28 - zinc finger, fyve domain containing 28, RNF152 - ring finger protein 152, CRTC3 - creb regulated transcription coactivator 3, PSAP - prosaposin, NLRX1 - nlr family member x1, FBXO18 - f-box protein, helicase, 18, ABL1 - c-abl oncogene 1, non-receptor tyrosine kinase, NCOR2 - nuclear recept…
GO:2001257	regulation of cation channel activity	0.000486	0.0743	2.03	25	[GSG1L - gsg1-like, RELN - reelin, OPRM1 - opioid receptor, mu 1, FGF14 - fibroblast growth factor 14, CAPN1 - calpain 1, (mu/i) large subunit, RNF207 - ring finger protein 207, DYSF - dysferlin, limb girdle muscular dystrophy 2b (autosomal recessive), PPARGC1A - peroxisome proliferator-activated receptor gamma, coactivator 1 alpha, SHANK3 - sh3 and multiple ankyrin repeat domains 3, MEF2C - myoc…
GO:0030097	hemopoiesis	0.000507	0.0766	2.48	16	[TPO - thyroid peroxidase, RUNX3 - runt-related transcription factor 3, SPTA1 - spectrin, alpha, erythrocytic 1 (elliptocytosis 2), ADD2 - adducin 2 (beta), KIRREL3 - kin of irre like 3 (drosophila), GATA3 - gata binding protein 3, RUNX2 - runt-related transcription factor 2, TTC7A - tetratricopeptide repeat domain 7a, TGFBR3 - transforming growth factor, beta receptor iii, RUNX1 - runt-related t…
GO:0046631	alpha-beta T cell activation	0.000507	0.076	3.11	11	[TCF7 - transcription factor 7 (t-cell specific, hmg-box), SEMA4A - sema domain, immunoglobulin domain (ig), transmembrane domain (tm) and short cytoplasmic domain, (semaphorin) 4a, ABL1 - c-abl oncogene 1, non-receptor tyrosine kinase, SATB1 - satb homeobox 1, RPL22 - ribosomal protein l22, BCL11B - b-cell cll/lymphoma 11b (zinc finger protein), GATA3 - gata binding protein 3, RORC - rar-related…
GO:0050794	regulation of cellular process	0.000512	0.0759	1.08	730	[ZMYND8 - zinc finger, mynd-type containing 8, ARAP1 - arfgap with rhogap domain, ankyrin repeat and ph domain 1, PCGF5 - polycomb group ring finger 5, BMP2K - bmp2 inducible kinase, MAD2L1BP - mad2l1 binding protein, ZNF341 - zinc finger protein 341, MDGA1 - mam domain containing glycosylphosphatidylinositol anchor 1, SPTA1 - spectrin, alpha, erythrocytic 1 (elliptocytosis 2), ZFYVE28 - zinc fin…
homolog (chlamydomonas), SPRED3 - sprouty-related, evh1 domain containing 3, RAC2 - ras-related c3 botulinum toxin substrate 2 (rho family, small gtp binding protein rac2), DISC1 - disrupted in schizophrenia 1, MAD1L1 - mad1 mitotic arrest deficient-like 1 (yeast), EHD2 - eh-domain containing 2, VSTM2A - v-set and transmembrane domain containing 2a, LTBP4 - latent transforming growth factor beta …
GO:0022604	regulation of cell morphogenesis	0.000512	0.0752	1.55	58	[TIAM1 - t-cell lymphoma invasion and metastasis 1, ARAP1 - arfgap with rhogap domain, ankyrin repeat and ph domain 1, PARK2 - parkinson protein 2, e3 ubiquitin protein ligase (parkin), SPTA1 - spectrin, alpha, erythrocytic 1 (elliptocytosis 2), RELN - reelin, PLXNC1 - plexin c1, CAMK2B - calcium/calmodulin-dependent protein kinase ii beta, LINGO1 - leucine rich repeat and ig domain containing 1,…
GO:0051963	regulation of synapse assembly	0.000513	0.0746	2.28	19	[LRRC4B - leucine rich repeat containing 4b, ASIC2 - acid-sensing (proton-gated) ion channel 2, MDGA1 - mam domain containing glycosylphosphatidylinositol anchor 1, NTNG2 - netrin g2, EPHB2 - eph receptor b2, GPC6 - glypican 6, SLIT1 - slit homolog 1 (drosophila), SEMA4A - sema domain, immunoglobulin domain (ig), transmembrane domain (tm) and short cytoplasmic domain, (semaphorin) 4a, NTN1 - netr…
GO:0050851	antigen receptor-mediated signaling pathway	0.000519	0.0746	1.96	27	[TRDC - t cell receptor delta constant, VAV3 - vav 3 guanine nucleotide exchange factor, IKBKG - inhibitor of kappa light polypeptide gene enhancer in b-cells, kinase gamma, PTPRJ - protein tyrosine phosphatase, receptor type, j, CARD11 - caspase recruitment domain family, member 11, ABL1 - c-abl oncogene 1, non-receptor tyrosine kinase, MEF2C - myocyte enhancer factor 2c, RFTN1 - raftlin, lipid …
GO:0050790	regulation of catalytic activity	0.00053	0.0755	1.24	196	[ARAP1 - arfgap with rhogap domain, ankyrin repeat and ph domain 1, BMP2K - bmp2 inducible kinase, AGAP1 - arfgap with gtpase domain, ankyrin repeat and ph domain 1, MAPRE3 - microtubule-associated protein, rp/eb family, member 3, ZFYVE28 - zinc finger, fyve domain containing 28, SPOCK1 - sparc/osteonectin, cwcv and kazal-like domains proteoglycan (testican) 1, PLXNC1 - plexin c1, CORO1C - coroni…
GO:0010563	negative regulation of phosphorus metabolic process	0.000553	0.0781	1.52	61	[PARK2 - parkinson protein 2, e3 ubiquitin protein ligase (parkin), ZFYVE28 - zinc finger, fyve domain containing 28, ZMYND11 - zinc finger, mynd-type containing 11, PTPRJ - protein tyrosine phosphatase, receptor type, j, CORO1C - coronin, actin binding protein, 1c, SH2B3 - sh2b adaptor protein 3, ABL1 - c-abl oncogene 1, non-receptor tyrosine kinase, MAPT - microtubule-associated protein tau, SE…
GO:0045936	negative regulation of phosphate metabolic process	0.000553	0.0773	1.52	61	[PARK2 - parkinson protein 2, e3 ubiquitin protein ligase (parkin), ZFYVE28 - zinc finger, fyve domain containing 28, PTPRJ - protein tyrosine phosphatase, receptor type, j, ZMYND11 - zinc finger, mynd-type containing 11, CORO1C - coronin, actin binding protein, 1c, SH2B3 - sh2b adaptor protein 3, ABL1 - c-abl oncogene 1, non-receptor tyrosine kinase, MAPT - microtubule-associated protein tau, SE…
GO:0002521	leukocyte differentiation	0.000554	0.0768	1.76	36	[MSH2 - muts homolog 2, colon cancer, nonpolyposis type 1 (e. coli), RPL22 - ribosomal protein l22, BCL11B - b-cell cll/lymphoma 11b (zinc finger protein), RHOH - ras homolog family member h, PTPRJ - protein tyrosine phosphatase, receptor type, j, SEMA4A - sema domain, immunoglobulin domain (ig), transmembrane domain (tm) and short cytoplasmic domain, (semaphorin) 4a, CARD11 - caspase recruitment…
GO:0043586	tongue development	0.000564	0.0774	6.12	5	[EGFR - epidermal growth factor receptor, GLI3 - gli family zinc finger 3, PRDM16 - pr domain containing 16, WNT10A - wingless-type mmtv integration site family, member 10a, BNC2 - basonuclin 2]
GO:0010648	negative regulation of cell communication	0.000573	0.0779	1.32	128	[PARK2 - parkinson protein 2, e3 ubiquitin protein ligase (parkin), OPRM1 - opioid receptor, mu 1, ZFYVE28 - zinc finger, fyve domain containing 28, RNF152 - ring finger protein 152, CRTC3 - creb regulated transcription coactivator 3, NLRX1 - nlr family member x1, ABL1 - c-abl oncogene 1, non-receptor tyrosine kinase, NCOR2 - nuclear receptor corepressor 2, SHANK2 - sh3 and multiple ankyrin repea…
GO:0051271	negative regulation of cellular component movement	0.000574	0.0773	1.73	38	[ZMYND8 - zinc finger, mynd-type containing 8, STK24 - serine/threonine kinase 24, CRK - v-crk avian sarcoma virus ct10 oncogene homolog, LDLRAD4 - low density lipoprotein receptor class a domain containing 4, SLIT2 - slit homolog 2 (drosophila), PTPRJ - protein tyrosine phosphatase, receptor type, j, FUZ - fuzzy planar cell polarity protein, JUP - junction plakoglobin, CHRD - chordin, CORO1C - c…
GO:0051240	positive regulation of multicellular organismal process	0.000589	0.0786	1.27	158	[ZMYND8 - zinc finger, mynd-type containing 8, DHX9 - deah (asp-glu-ala-his) box helicase 9, PARK2 - parkinson protein 2, e3 ubiquitin protein ligase (parkin), RELN - reelin, OPRM1 - opioid receptor, mu 1, ZEB1 - zinc finger e-box binding homeobox 1, TCF12 - transcription factor 12, PLXNC1 - plexin c1, PLEKHM1 - pleckstrin homology domain containing, family m (with run domain) member 1, CARD11 - …
GO:0022898	regulation of transmembrane transporter activity	0.000589	0.078	1.83	32	[GSG1L - gsg1-like, RELN - reelin, OPRM1 - opioid receptor, mu 1, OSR1 - odd-skipped related 1 (drosophila), FGF14 - fibroblast growth factor 14, CAPN1 - calpain 1, (mu/i) large subunit, RNF207 - ring finger protein 207, DYSF - dysferlin, limb girdle muscular dystrophy 2b (autosomal recessive), SHANK3 - sh3 and multiple ankyrin repeat domains 3, PPARGC1A - peroxisome proliferator-activated recept…
GO:0045619	regulation of lymphocyte differentiation	0.000609	0.0799	2	25	[RHOH - ras homolog family member h, ZEB1 - zinc finger e-box binding homeobox 1, CARD11 - caspase recruitment domain family, member 11, GLI3 - gli family zinc finger 3, ABL1 - c-abl oncogene 1, non-receptor tyrosine kinase, LOXL3 - lysyl oxidase-like 3, NLRP3 - nlr family, pyrin domain containing 3, NDFIP1 - nedd4 family interacting protein 1, NFATC2 - nuclear factor of activated t-cells, cytopl…
GO:0050789	regulation of biological process	0.000629	0.0818	1.07	770	[ARAP1 - arfgap with rhogap domain, ankyrin repeat and ph domain 1, BMP2K - bmp2 inducible kinase, ABL1 - c-abl oncogene 1, non-receptor tyrosine kinase, ABCA4 - atp-binding cassette, sub-family a (abc1), member 4, GCNT2 - glucosaminyl (n-acetyl) transferase 2, i-branching enzyme (i blood group), LMAN2 - lectin, mannose-binding 2, ABR - active bcr-related, ACADM - acyl-coa dehydrogenase, c-4 to c…
ional regulating factor 1, DOK5 - docking protein 5, ODC1 - ornithine decarboxylase 1, SRCIN1 - src kinase signaling inhibitor 1, PLCD3 - phospholipase c, delta 3, WWC1 - ww and c2 domain containing 1, SMG6 - smg6 nonsense mediated mrna decay factor, CENPJ - centromere protein j, FBXW11 - f-box and wd repeat domain containing 11, ASCC1 - activating signal cointegrator 1 complex subunit 1, GDF7 - …
GO:0072164	mesonephric tubule development	0.00063	0.0812	3.24	10	[PKD1 - polycystic kidney disease 1 (autosomal dominant), SFRP1 - secreted frizzled-related protein 1, OSR1 - odd-skipped related 1 (drosophila), FGFR1 - fibroblast growth factor receptor 1, SPRY1 - sprouty homolog 1, antagonist of fgf signaling (drosophila), SLIT2 - slit homolog 2 (drosophila), SMAD7 - smad family member 7, BMP4 - bone morphogenetic protein 4, RARA - retinoic acid receptor, alph…
GO:0035556	intracellular signal transduction	0.00063	0.0805	1.28	150	[MCF2L - mcf.2 cell line derived transforming sequence-like, SPTA1 - spectrin, alpha, erythrocytic 1 (elliptocytosis 2), OPRM1 - opioid receptor, mu 1, IKBKG - inhibitor of kappa light polypeptide gene enhancer in b-cells, kinase gamma, SAMD14 - sterile alpha motif domain containing 14, NLRX1 - nlr family member x1, PLEKHM1 - pleckstrin homology domain containing, family m (with run domain) membe…
GO:0042325	regulation of phosphorylation	0.000631	0.08	1.29	144	[PARK2 - parkinson protein 2, e3 ubiquitin protein ligase (parkin), RELN - reelin, OPRM1 - opioid receptor, mu 1, MAPRE3 - microtubule-associated protein, rp/eb family, member 3, ZFYVE28 - zinc finger, fyve domain containing 28, IKBKG - inhibitor of kappa light polypeptide gene enhancer in b-cells, kinase gamma, PSAP - prosaposin, FBXO18 - f-box protein, helicase, 18, MID1 - midline 1 (opitz/bbb …
GO:0050855	regulation of B cell receptor signaling pathway	0.000637	0.0801	3.83	8	[ELF1 - e74-like factor 1 (ets domain transcription factor), PRKCB - protein kinase c, beta, PTPN22 - protein tyrosine phosphatase, non-receptor type 22 (lymphoid), FOXP1 - forkhead box p1, BLK - b lymphoid tyrosine kinase, PLCL2 - phospholipase c-like 2, CD81 - cd81 molecule, RUNX1 - runt-related transcription factor 1]
GO:1900273	positive regulation of long-term synaptic potentiation	0.000647	0.0806	4.28	7	[CRTC1 - creb regulated transcription coactivator 1, SHISA7 - shisa family member 7, RELN - reelin, SHANK3 - sh3 and multiple ankyrin repeat domains 3, EPHB2 - eph receptor b2, ADCY8 - adenylate cyclase 8 (brain), ADCY1 - adenylate cyclase 1 (brain)]
GO:0007221	positive regulation of transcription of Notch receptor target	0.000647	0.0799	4.28	7	[WWC1 - ww and c2 domain containing 1, PBX1 - pre-b-cell leukemia homeobox 1, MAML3 - mastermind-like 3 (drosophila), PLXND1 - plexin d1, MAML2 - mastermind-like 2 (drosophila), KAT2B - k(lysine) acetyltransferase 2b, NOTCH1 - notch 1]
GO:0009968	negative regulation of signal transduction	0.000654	0.0801	1.33	120	[PARK2 - parkinson protein 2, e3 ubiquitin protein ligase (parkin), OPRM1 - opioid receptor, mu 1, ZFYVE28 - zinc finger, fyve domain containing 28, RNF152 - ring finger protein 152, CRTC3 - creb regulated transcription coactivator 3, NLRX1 - nlr family member x1, ABL1 - c-abl oncogene 1, non-receptor tyrosine kinase, NCOR2 - nuclear receptor corepressor 2, CBLC - cbl proto-oncogene c, e3 ubiquit…
GO:0023057	negative regulation of signaling	0.000664	0.0807	1.31	128	[PARK2 - parkinson protein 2, e3 ubiquitin protein ligase (parkin), OPRM1 - opioid receptor, mu 1, ZFYVE28 - zinc finger, fyve domain containing 28, RNF152 - ring finger protein 152, CRTC3 - creb regulated transcription coactivator 3, NLRX1 - nlr family member x1, ABL1 - c-abl oncogene 1, non-receptor tyrosine kinase, NCOR2 - nuclear receptor corepressor 2, SHANK2 - sh3 and multiple ankyrin repea…
GO:0002768	immune response-regulating cell surface receptor signaling pathway	0.000674	0.0812	1.72	38	[CRK - v-crk avian sarcoma virus ct10 oncogene homolog, VAV3 - vav 3 guanine nucleotide exchange factor, TRDC - t cell receptor delta constant, ABI1 - abl-interactor 1, ICAM2 - intercellular adhesion molecule 2, IKBKG - inhibitor of kappa light polypeptide gene enhancer in b-cells, kinase gamma, PTPRJ - protein tyrosine phosphatase, receptor type, j, CARD11 - caspase recruitment domain family, me…
GO:0032990	cell part morphogenesis	0.000685	0.0819	1.78	34	[ABI1 - abl-interactor 1, ANKRD27 - ankyrin repeat domain 27 (vps9 domain), SEMA4A - sema domain, immunoglobulin domain (ig), transmembrane domain (tm) and short cytoplasmic domain, (semaphorin) 4a, EGFR - epidermal growth factor receptor, WNT7B - wingless-type mmtv integration site family, member 7b, SHANK3 - sh3 and multiple ankyrin repeat domains 3, ADARB1 - adenosine deaminase, rna-specific, …
GO:0048468	cell development	0.000718	0.0852	1.47	69	[SYN1 - synapsin i, CRB1 - crumbs homolog 1 (drosophila), ABI1 - abl-interactor 1, PSAP - prosaposin, PLD6 - phospholipase d family, member 6, SH2B3 - sh2b adaptor protein 3, PICK1 - protein interacting with prkca 1, MAPT - microtubule-associated protein tau, WNT7B - wingless-type mmtv integration site family, member 7b, EIF2AK3 - eukaryotic translation initiation factor 2-alpha kinase 3, NOTCH1 …
GO:0050798	activated T cell proliferation	0.000746	0.0878	11.02	3	[ABL1 - c-abl oncogene 1, non-receptor tyrosine kinase, SATB1 - satb homeobox 1, FYN - fyn oncogene related to src, fgr, yes]
GO:0032409	regulation of transporter activity	0.000761	0.0889	1.78	33	[GSG1L - gsg1-like, RELN - reelin, OPRM1 - opioid receptor, mu 1, OSR1 - odd-skipped related 1 (drosophila), FGF14 - fibroblast growth factor 14, RNF207 - ring finger protein 207, CAPN1 - calpain 1, (mu/i) large subunit, DYSF - dysferlin, limb girdle muscular dystrophy 2b (autosomal recessive), SHANK3 - sh3 and multiple ankyrin repeat domains 3, PPARGC1A - peroxisome proliferator-activated recept…
GO:0038083	peptidyl-tyrosine autophosphorylation	0.000761	0.0882	3.42	9	[ABL1 - c-abl oncogene 1, non-receptor tyrosine kinase, EGFR - epidermal growth factor receptor, IGF1R - insulin-like growth factor 1 receptor, ROS1 - c-ros oncogene 1 , receptor tyrosine kinase, ITK - il2-inducible t-cell kinase, FYN - fyn oncogene related to src, fgr, yes, BLK - b lymphoid tyrosine kinase, SRMS - src-related kinase lacking c-terminal regulatory tyrosine and n-terminal myristyla…
GO:0048523	negative regulation of cellular process	0.000763	0.0877	1.15	369	[ARAP1 - arfgap with rhogap domain, ankyrin repeat and ph domain 1, ZMYND8 - zinc finger, mynd-type containing 8, MAD2L1BP - mad2l1 binding protein, SPTA1 - spectrin, alpha, erythrocytic 1 (elliptocytosis 2), ZFYVE28 - zinc finger, fyve domain containing 28, FBXO18 - f-box protein, helicase, 18, PLXNC1 - plexin c1, SPOCK1 - sparc/osteonectin, cwcv and kazal-like domains proteoglycan (testican) 1,…
GO:0099601	regulation of neurotransmitter receptor activity	0.000772	0.0881	2.57	14	[SHISA7 - shisa family member 7, GSG1L - gsg1-like, RELN - reelin, OPRM1 - opioid receptor, mu 1, CAPN1 - calpain 1, (mu/i) large subunit, EPHB2 - eph receptor b2, NETO2 - neuropilin (nrp) and tolloid (tll)-like 2, DAPK1 - death-associated protein kinase 1, SHANK3 - sh3 and multiple ankyrin repeat domains 3, PPARGC1A - peroxisome proliferator-activated receptor gamma, coactivator 1 alpha, MEF2C -…
GO:0051128	regulation of cellular component organization	0.000785	0.0889	1.21	221	[ZMYND8 - zinc finger, mynd-type containing 8, ARAP1 - arfgap with rhogap domain, ankyrin repeat and ph domain 1, MDGA1 - mam domain containing glycosylphosphatidylinositol anchor 1, BMP2K - bmp2 inducible kinase, MAD2L1BP - mad2l1 binding protein, SPTA1 - spectrin, alpha, erythrocytic 1 (elliptocytosis 2), MAPRE3 - microtubule-associated protein, rp/eb family, member 3, PLXNC1 - plexin c1, SPOCK…
GO:0010810	regulation of cell-substrate adhesion	0.000793	0.089	1.86	29	[CRK - v-crk avian sarcoma virus ct10 oncogene homolog, PLEKHA2 - pleckstrin homology domain containing, family a (phosphoinositide binding specific) member 2, PTPRJ - protein tyrosine phosphatase, receptor type, j, SPOCK1 - sparc/osteonectin, cwcv and kazal-like domains proteoglycan (testican) 1, JUP - junction plakoglobin, NEDD9 - neural precursor cell expressed, developmentally down-regulated …
GO:0051056	regulation of small GTPase mediated signal transduction	0.000794	0.0885	1.65	42	[TIAM1 - t-cell lymphoma invasion and metastasis 1, ARAP1 - arfgap with rhogap domain, ankyrin repeat and ph domain 1, MCF2L - mcf.2 cell line derived transforming sequence-like, RELN - reelin, VAV3 - vav 3 guanine nucleotide exchange factor, CRK - v-crk avian sarcoma virus ct10 oncogene homolog, RHOH - ras homolog family member h, ARHGEF10L - rho guanine nucleotide exchange factor (gef) 10-like,…
GO:0072163	mesonephric epithelium development	0.000811	0.0898	3.15	10	[PKD1 - polycystic kidney disease 1 (autosomal dominant), SFRP1 - secreted frizzled-related protein 1, OSR1 - odd-skipped related 1 (drosophila), FGFR1 - fibroblast growth factor receptor 1, SPRY1 - sprouty homolog 1, antagonist of fgf signaling (drosophila), SLIT2 - slit homolog 2 (drosophila), BMP4 - bone morphogenetic protein 4, SMAD7 - smad family member 7, RARA - retinoic acid receptor, alph…
GO:0050772	positive regulation of axonogenesis	0.000819	0.0899	2.31	17	[TIAM1 - t-cell lymphoma invasion and metastasis 1, PLXND1 - plexin d1, NIN - ninein (gsk3b interacting protein), SLIT2 - slit homolog 2 (drosophila), NDEL1 - nude neurodevelopment protein 1-like 1, PLXNC1 - plexin c1, PLXNA2 - plexin a2, TUBB2B - tubulin, beta 2b class iib, PLXNA4 - plexin a4, NTN1 - netrin 1, CDH4 - cadherin 4, type 1, r-cadherin (retinal), SEMA4D - sema domain, immunoglobulin …
GO:0051179	localization	0.000852	0.0929	1.14	384	[TMEM163 - transmembrane protein 163, DST - dystonin, SPTA1 - spectrin, alpha, erythrocytic 1 (elliptocytosis 2), AGAP1 - arfgap with gtpase domain, ankyrin repeat and ph domain 1, SLC39A11 - solute carrier family 39, member 11, MAPRE3 - microtubule-associated protein, rp/eb family, member 3, GPR107 - g protein-coupled receptor 107, EPG5 - ectopic p-granules autophagy protein 5 homolog (c. elegan…
GO:0006793	phosphorus metabolic process	0.000869	0.094	1.24	186	[BMP2K - bmp2 inducible kinase, RELN - reelin, SPTA1 - spectrin, alpha, erythrocytic 1 (elliptocytosis 2), IKBKG - inhibitor of kappa light polypeptide gene enhancer in b-cells, kinase gamma, CIITA - class ii, major histocompatibility complex, transactivator, PNLIPRP2 - pancreatic lipase-related protein 2, PLD6 - phospholipase d family, member 6, TTC7A - tetratricopeptide repeat domain 7a, CARD11…
GO:0010171	body morphogenesis	0.000872	0.0937	7.34	4	[CDON - cell adhesion associated, oncogene regulated, GPC3 - glypican 3, GNAS - gnas complex locus, FUZ - fuzzy planar cell polarity protein]
GO:0070841	inclusion body assembly	0.000872	0.093	7.34	4	[PARK2 - parkinson protein 2, e3 ubiquitin protein ligase (parkin), MAPT - microtubule-associated protein tau, BAG3 - bcl2-associated athanogene 3, VCP - valosin containing protein]
GO:0061061	muscle structure development	0.000947	0.1	2.28	17	[COL6A3 - collagen, type vi, alpha 3, EVC - ellis van creveld syndrome, PDLIM7 - pdz and lim domain 7 (enigma), TCF12 - transcription factor 12, PAX3 - paired box 3, CACNA1H - calcium channel, voltage-dependent, t type, alpha 1h subunit, DISP1 - dispatched homolog 1 (drosophila), NEB - nebulin, DMD - dystrophin, MYOM1 - myomesin 1, MEF2C - myocyte enhancer factor 2c, SGCD - sarcoglycan, delta (35…
GO:0060284	regulation of cell development	0.000948	0.0996	1.36	96	[TIAM1 - t-cell lymphoma invasion and metastasis 1, ZMYND8 - zinc finger, mynd-type containing 8, PARK2 - parkinson protein 2, e3 ubiquitin protein ligase (parkin), RELN - reelin, OPRM1 - opioid receptor, mu 1, CAMSAP2 - calmodulin regulated spectrin-associated protein family, member 2, CAMK1D - calcium/calmodulin-dependent protein kinase id, ZEB1 - zinc finger e-box binding homeobox 1, TCF12 - t…

## Sheet: TableS4G
Table S4G. GO Terms enriched among gene body hypomethylated genes in high stress group
GO Term	Description	P-value	FDR q-value	Enrichment	No. Genes	Genes
GO:0051239	regulation of multicellular organismal process	2.5e-12	3.71e-08	1.34	410	[MDGA1 - mam domain containing glycosylphosphatidylinositol anchor 1, AKAP12 - a kinase (prka) anchor protein 12, SPOCK1 - sparc/osteonectin, cwcv and kazal-like domains proteoglycan (testican) 1, ABCA1 - atp-binding cassette, sub-family a (abc1), member 1, LINGO1 - leucine rich repeat and ig domain containing 1, DOCK5 - dedicator of cytokinesis 5, CARD11 - caspase recruitment domain family, memb…
GO:0007165	signal transduction	3.93e-10	2.91e-06	1.25	515	[GFRA1 - gdnf family receptor alpha 1, GFRA2 - gdnf family receptor alpha 2, AGAP3 - arfgap with gtpase domain, ankyrin repeat and ph domain 3, AKAP12 - a kinase (prka) anchor protein 12, ABCA1 - atp-binding cassette, sub-family a (abc1), member 1, LIFR - leukemia inhibitory factor receptor alpha, GEM - gtp binding protein overexpressed in skeletal muscle, PDIA5 - protein disulfide isomerase fami…
GO:0023051	regulation of signaling	8.14e-10	4.02e-06	1.27	444	[ZFYVE28 - zinc finger, fyve domain containing 28, FBXO18 - f-box protein, helicase, 18, AKAP12 - a kinase (prka) anchor protein 12, ABCA1 - atp-binding cassette, sub-family a (abc1), member 1, LIFR - leukemia inhibitory factor receptor alpha, CARD11 - caspase recruitment domain family, member 11, GCNT2 - glucosaminyl (n-acetyl) transferase 2, i-branching enzyme (i blood group), NCOR2 - nuclear r…
GO:0010646	regulation of cell communication	1.09e-09	4.06e-06	1.27	439	[ZFYVE28 - zinc finger, fyve domain containing 28, FBXO18 - f-box protein, helicase, 18, AKAP12 - a kinase (prka) anchor protein 12, ABCA1 - atp-binding cassette, sub-family a (abc1), member 1, LIFR - leukemia inhibitory factor receptor alpha, CARD11 - caspase recruitment domain family, member 11, GCNT2 - glucosaminyl (n-acetyl) transferase 2, i-branching enzyme (i blood group), NCOR2 - nuclear r…
GO:0022610	biological adhesion	3.53e-09	1.05e-05	1.62	137	[EMP2 - epithelial membrane protein 2, RELN - reelin, CTNNA3 - catenin (cadherin-associated protein), alpha 3, MAEA - macrophage erythroblast attacher, CDH3 - cadherin 3, type 1, p-cadherin (placental), SPOCK1 - sparc/osteonectin, cwcv and kazal-like domains proteoglycan (testican) 1, PLXNC1 - plexin c1, VMP1 - vacuole membrane protein 1, NTM - neurotrimin, PSEN1 - presenilin 1, PPFIA1 - protein …
GO:0051240	positive regulation of multicellular organismal process	8.83e-09	2.18e-05	1.4	239	[IL18R1 - interleukin 18 receptor 1, TRAK1 - trafficking protein, kinesin binding 1, AKAP12 - a kinase (prka) anchor protein 12, ABCA1 - atp-binding cassette, sub-family a (abc1), member 1, PLXNC1 - plexin c1, DOCK5 - dedicator of cytokinesis 5, CARD11 - caspase recruitment domain family, member 11, VSTM5 - v-set and transmembrane domain containing 5, IQGAP1 - iq motif containing gtpase activatin…
GO:0007155	cell adhesion	1.38e-08	2.93e-05	1.59	134	[EMP2 - epithelial membrane protein 2, RELN - reelin, CTNNA3 - catenin (cadherin-associated protein), alpha 3, MAEA - macrophage erythroblast attacher, CDH3 - cadherin 3, type 1, p-cadherin (placental), SPOCK1 - sparc/osteonectin, cwcv and kazal-like domains proteoglycan (testican) 1, PLXNC1 - plexin c1, VMP1 - vacuole membrane protein 1, NTM - neurotrimin, PPFIA1 - protein tyrosine phosphatase, …
GO:0097485	neuron projection guidance	1.17e-07	0.000217	2.03	56	[RELN - reelin, GFRA1 - gdnf family receptor alpha 1, GFRA2 - gdnf family receptor alpha 2, PTPRO - protein tyrosine phosphatase, receptor type, o, LGR6 - leucine-rich repeat containing g protein-coupled receptor 6, DSCAM - down syndrome cell adhesion molecule, IGSF9 - immunoglobulin superfamily, member 9, PTPRM - protein tyrosine phosphatase, receptor type, m, ENAH - enabled homolog (drosophila)…
GO:0007411	axon guidance	1.77e-07	0.000292	2.02	55	[RELN - reelin, GFRA1 - gdnf family receptor alpha 1, GFRA2 - gdnf family receptor alpha 2, PTPRO - protein tyrosine phosphatase, receptor type, o, LGR6 - leucine-rich repeat containing g protein-coupled receptor 6, DSCAM - down syndrome cell adhesion molecule, IGSF9 - immunoglobulin superfamily, member 9, PTPRM - protein tyrosine phosphatase, receptor type, m, ENAH - enabled homolog (drosophila)…
GO:2000026	regulation of multicellular organismal development	2.04e-07	0.000303	1.32	269	[MDGA1 - mam domain containing glycosylphosphatidylinositol anchor 1, EMP2 - epithelial membrane protein 2, SEMA4C - sema domain, immunoglobulin domain (ig), transmembrane domain (tm) and short cytoplasmic domain, (semaphorin) 4c, TRAK1 - trafficking protein, kinesin binding 1, PLXNC1 - plexin c1, SPOCK1 - sparc/osteonectin, cwcv and kazal-like domains proteoglycan (testican) 1, ABI2 - abl-intera…
GO:0007166	cell surface receptor signaling pathway	2.68e-07	0.000361	1.32	270	[NCF2 - neutrophil cytosolic factor 2, IL18R1 - interleukin 18 receptor 1, GFRA1 - gdnf family receptor alpha 1, NDP - norrie disease (pseudoglioma), GFRA2 - gdnf family receptor alpha 2, SEMA4C - sema domain, immunoglobulin domain (ig), transmembrane domain (tm) and short cytoplasmic domain, (semaphorin) 4c, PLXNC1 - plexin c1, BLNK - b-cell linker, LIFR - leukemia inhibitory factor receptor alp…
GO:0009966	regulation of signal transduction	4.93e-07	0.000609	1.24	379	[EMP2 - epithelial membrane protein 2, IL18R1 - interleukin 18 receptor 1, FAM13A - family with sequence similarity 13, member a, ZFYVE28 - zinc finger, fyve domain containing 28, SEMA4C - sema domain, immunoglobulin domain (ig), transmembrane domain (tm) and short cytoplasmic domain, (semaphorin) 4c, AKAP12 - a kinase (prka) anchor protein 12, FBXO18 - f-box protein, helicase, 18, BLNK - b-cell …
GO:0032502	developmental process	5.46e-07	0.000623	1.18	557	[MDGA1 - mam domain containing glycosylphosphatidylinositol anchor 1, GFRA1 - gdnf family receptor alpha 1, GFRA2 - gdnf family receptor alpha 2, SPOCK1 - sparc/osteonectin, cwcv and kazal-like domains proteoglycan (testican) 1, LIG1 - ligase i, dna, atp-dependent, CARD11 - caspase recruitment domain family, member 11, GCNT2 - glucosaminyl (n-acetyl) transferase 2, i-branching enzyme (i blood gro…
GO:0050793	regulation of developmental process	8e-07	0.000847	1.27	321	[MDGA1 - mam domain containing glycosylphosphatidylinositol anchor 1, EMP2 - epithelial membrane protein 2, SEMA4C - sema domain, immunoglobulin domain (ig), transmembrane domain (tm) and short cytoplasmic domain, (semaphorin) 4c, TRAK1 - trafficking protein, kinesin binding 1, PLXNC1 - plexin c1, ABCA1 - atp-binding cassette, sub-family a (abc1), member 1, SPOCK1 - sparc/osteonectin, cwcv and ka…
GO:0045664	regulation of neuron differentiation	1.24e-06	0.00123	1.56	107	[PARK2 - parkinson protein 2, e3 ubiquitin protein ligase (parkin), LRIG2 - leucine-rich repeats and immunoglobulin-like domains 2, RELN - reelin, MAGI2 - membrane associated guanylate kinase, ww and pdz domain containing 2, SEMA4C - sema domain, immunoglobulin domain (ig), transmembrane domain (tm) and short cytoplasmic domain, (semaphorin) 4c, TRAK1 - trafficking protein, kinesin binding 1, PLX…
GO:0048856	anatomical structure development	1.66e-06	0.00154	1.22	394	[MDGA1 - mam domain containing glycosylphosphatidylinositol anchor 1, GFRA1 - gdnf family receptor alpha 1, GFRA2 - gdnf family receptor alpha 2, SPOCK1 - sparc/osteonectin, cwcv and kazal-like domains proteoglycan (testican) 1, GCNT2 - glucosaminyl (n-acetyl) transferase 2, i-branching enzyme (i blood group), ABR - active bcr-related, CELSR1 - cadherin, egf lag seven-pass g-type receptor 1, PMP2…
GO:0045595	regulation of cell differentiation	2.26e-06	0.00197	1.31	236	[EMP2 - epithelial membrane protein 2, SEMA4C - sema domain, immunoglobulin domain (ig), transmembrane domain (tm) and short cytoplasmic domain, (semaphorin) 4c, TRAK1 - trafficking protein, kinesin binding 1, ABCA1 - atp-binding cassette, sub-family a (abc1), member 1, SPOCK1 - sparc/osteonectin, cwcv and kazal-like domains proteoglycan (testican) 1, PLXNC1 - plexin c1, LINGO1 - leucine rich rep…
GO:0065008	regulation of biological quality	2.73e-06	0.00225	1.2	434	[C9orf3 - chromosome 9 open reading frame 3, TMTC2 - transmembrane and tetratricopeptide repeat containing 2, STARD3 - star-related lipid transfer (start) domain containing 3, AKAP12 - a kinase (prka) anchor protein 12, ABCA1 - atp-binding cassette, sub-family a (abc1), member 1, PDIA5 - protein disulfide isomerase family a, member 5, DOCK5 - dedicator of cytokinesis 5, CARD11 - caspase recruitme…
GO:0019932	second-messenger-mediated signaling	2.94e-06	0.0023	1.87	54	[RCAN1 - regulator of calcineurin 1, PTPRJ - protein tyrosine phosphatase, receptor type, j, CAMK2D - calcium/calmodulin-dependent protein kinase ii delta, ABCA1 - atp-binding cassette, sub-family a (abc1), member 1, CASQ2 - calsequestrin 2 (cardiac muscle), LRRK2 - leucine-rich repeat kinase 2, HRC - histidine rich calcium binding protein, HRH1 - histamine receptor h1, NOS3 - nitric oxide syntha…
GO:0120035	regulation of plasma membrane bounded cell projection organization	2.98e-06	0.00221	1.53	109	[PARK2 - parkinson protein 2, e3 ubiquitin protein ligase (parkin), LRIG2 - leucine-rich repeats and immunoglobulin-like domains 2, MAGI2 - membrane associated guanylate kinase, ww and pdz domain containing 2, RELN - reelin, SEMA4C - sema domain, immunoglobulin domain (ig), transmembrane domain (tm) and short cytoplasmic domain, (semaphorin) 4c, TRAK1 - trafficking protein, kinesin binding 1, SPO…
GO:0035556	intracellular signal transduction	3.39e-06	0.00239	1.33	214	[GFRA1 - gdnf family receptor alpha 1, GFRA2 - gdnf family receptor alpha 2, ABCA1 - atp-binding cassette, sub-family a (abc1), member 1, BLNK - b-cell linker, ABI2 - abl-interactor 2, DOCK5 - dedicator of cytokinesis 5, CARD11 - caspase recruitment domain family, member 11, LCP2 - lymphocyte cytosolic protein 2 (sh2 domain containing leukocyte protein of 76kda), ABR - active bcr-related, RDX - r…
GO:0051960	regulation of nervous system development	3.81e-06	0.00257	1.44	138	[LRIG2 - leucine-rich repeats and immunoglobulin-like domains 2, PARK2 - parkinson protein 2, e3 ubiquitin protein ligase (parkin), MDGA1 - mam domain containing glycosylphosphatidylinositol anchor 1, MAGI2 - membrane associated guanylate kinase, ww and pdz domain containing 2, RELN - reelin, PAX2 - paired box 2, SEMA4C - sema domain, immunoglobulin domain (ig), transmembrane domain (tm) and shor…
GO:0010975	regulation of neuron projection development	3.91e-06	0.00252	1.6	87	[TIAM1 - t-cell lymphoma invasion and metastasis 1, LRIG2 - leucine-rich repeats and immunoglobulin-like domains 2, PARK2 - parkinson protein 2, e3 ubiquitin protein ligase (parkin), RELN - reelin, MAGI2 - membrane associated guanylate kinase, ww and pdz domain containing 2, SEMA4C - sema domain, immunoglobulin domain (ig), transmembrane domain (tm) and short cytoplasmic domain, (semaphorin) 4c, …
GO:0043087	regulation of GTPase activity	4.14e-06	0.00256	1.66	77	[TIAM1 - t-cell lymphoma invasion and metastasis 1, TBC1D20 - tbc1 domain family, member 20, RABEP1 - rabaptin, rab gtpase binding effector protein 1, AGAP1 - arfgap with gtpase domain, ankyrin repeat and ph domain 1, IQGAP2 - iq motif containing gtpase activating protein 2, VAV3 - vav 3 guanine nucleotide exchange factor, FAM13A - family with sequence similarity 13, member a, AGAP3 - arfgap with…
GO:0031344	regulation of cell projection organization	4.9e-06	0.00291	1.51	109	[PARK2 - parkinson protein 2, e3 ubiquitin protein ligase (parkin), LRIG2 - leucine-rich repeats and immunoglobulin-like domains 2, MAGI2 - membrane associated guanylate kinase, ww and pdz domain containing 2, RELN - reelin, SEMA4C - sema domain, immunoglobulin domain (ig), transmembrane domain (tm) and short cytoplasmic domain, (semaphorin) 4c, TRAK1 - trafficking protein, kinesin binding 1, SPO…
GO:0099177	regulation of trans-synaptic signaling	4.98e-06	0.00284	1.64	78	[SYN1 - synapsin i, PARK2 - parkinson protein 2, e3 ubiquitin protein ligase (parkin), RELN - reelin, PNKD - paroxysmal nonkinesigenic dyskinesia, SORCS2 - sortilin-related vps10 domain containing receptor 2, SLC6A4 - solute carrier family 6 (neurotransmitter transporter), member 4, PTPRS - protein tyrosine phosphatase, receptor type, s, AKAP12 - a kinase (prka) anchor protein 12, CAMK2B - calciu…
GO:0050804	modulation of chemical synaptic transmission	4.98e-06	0.00274	1.64	78	[SYN1 - synapsin i, PARK2 - parkinson protein 2, e3 ubiquitin protein ligase (parkin), RELN - reelin, PNKD - paroxysmal nonkinesigenic dyskinesia, SORCS2 - sortilin-related vps10 domain containing receptor 2, SLC6A4 - solute carrier family 6 (neurotransmitter transporter), member 4, PTPRS - protein tyrosine phosphatase, receptor type, s, AKAP12 - a kinase (prka) anchor protein 12, CAMK2B - calciu…
GO:0043547	positive regulation of GTPase activity	9.64e-06	0.0051	1.7	65	[TIAM1 - t-cell lymphoma invasion and metastasis 1, TBC1D20 - tbc1 domain family, member 20, RABEP1 - rabaptin, rab gtpase binding effector protein 1, AGAP1 - arfgap with gtpase domain, ankyrin repeat and ph domain 1, VAV3 - vav 3 guanine nucleotide exchange factor, FAM13A - family with sequence similarity 13, member a, AGAP3 - arfgap with gtpase domain, ankyrin repeat and ph domain 3, DOCK4 - de…
GO:0007167	enzyme linked receptor protein signaling pathway	1.03e-05	0.00527	1.5	105	[NCF2 - neutrophil cytosolic factor 2, GFRA1 - gdnf family receptor alpha 1, GFRA2 - gdnf family receptor alpha 2, FLT3 - fms-related tyrosine kinase 3, FLT1 - fms-related tyrosine kinase 1, FLT4 - fms-related tyrosine kinase 4, LIFR - leukemia inhibitory factor receptor alpha, BLNK - b-cell linker, GCNT2 - glucosaminyl (n-acetyl) transferase 2, i-branching enzyme (i blood group), IQGAP1 - iq mot…
GO:0098609	cell-cell adhesion	1.24e-05	0.0061	1.63	74	[CTNNA3 - catenin (cadherin-associated protein), alpha 3, KIFC3 - kinesin family member c3, CDH3 - cadherin 3, type 1, p-cadherin (placental), DSCAM - down syndrome cell adhesion molecule, PTPRS - protein tyrosine phosphatase, receptor type, s, IGSF9 - immunoglobulin superfamily, member 9, PTPRM - protein tyrosine phosphatase, receptor type, m, PTPRT - protein tyrosine phosphatase, receptor type,…
GO:0048583	regulation of response to stimulus	1.55e-05	0.00741	1.17	463	[ZFYVE28 - zinc finger, fyve domain containing 28, AKAP12 - a kinase (prka) anchor protein 12, FBXO18 - f-box protein, helicase, 18, LIFR - leukemia inhibitory factor receptor alpha, ABCA1 - atp-binding cassette, sub-family a (abc1), member 1, CARD11 - caspase recruitment domain family, member 11, NCOR2 - nuclear receptor corepressor 2, GCNT2 - glucosaminyl (n-acetyl) transferase 2, i-branching e…
GO:0022603	regulation of anatomical structure morphogenesis	1.91e-05	0.00883	1.38	149	[EMP2 - epithelial membrane protein 2, PARK2 - parkinson protein 2, e3 ubiquitin protein ligase (parkin), MAGI2 - membrane associated guanylate kinase, ww and pdz domain containing 2, RELN - reelin, GCM1 - glial cells missing homolog 1 (drosophila), PAX2 - paired box 2, SEMA4C - sema domain, immunoglobulin domain (ig), transmembrane domain (tm) and short cytoplasmic domain, (semaphorin) 4c, FLT1 …
GO:0006897	endocytosis	1.94e-05	0.0087	1.62	72	[AP2A2 - adaptor-related protein complex 2, alpha 2 subunit, NCF2 - neutrophil cytosolic factor 2, RABEP1 - rabaptin, rab gtpase binding effector protein 1, EPN2 - epsin 2, LOXL4 - lysyl oxidase-like 4, FCHSD2 - fch and double sh3 domains 2, ADRBK1 - adrenergic, beta, receptor kinase 1, RIN2 - ras and rab interactor 2, DENND1B - denn/madd domain containing 1b, LRRK2 - leucine-rich repeat kinase 2…
GO:0007169	transmembrane receptor protein tyrosine kinase signaling pathway	2.13e-05	0.00927	1.57	81	[TIAM1 - t-cell lymphoma invasion and metastasis 1, ARHGEF28 - rho guanine nucleotide exchange factor (gef) 28, AP2A2 - adaptor-related protein complex 2, alpha 2 subunit, NCF2 - neutrophil cytosolic factor 2, VAV3 - vav 3 guanine nucleotide exchange factor, GFRA1 - gdnf family receptor alpha 1, GFRA2 - gdnf family receptor alpha 2, FLT3 - fms-related tyrosine kinase 3, FLT1 - fms-related tyrosin…
GO:0043085	positive regulation of catalytic activity	2.46e-05	0.0104	1.33	181	[NCF2 - neutrophil cytosolic factor 2, SLC27A1 - solute carrier family 27 (fatty acid transporter), member 1, EMP2 - epithelial membrane protein 2, TBC1D20 - tbc1 domain family, member 20, MAGI2 - membrane associated guanylate kinase, ww and pdz domain containing 2, AGAP1 - arfgap with gtpase domain, ankyrin repeat and ph domain 1, RELN - reelin, FAM13A - family with sequence similarity 13, membe…
GO:0007605	sensory perception of sound	3.19e-05	0.0131	2.14	30	[LRIG2 - leucine-rich repeats and immunoglobulin-like domains 2, SRRM4 - serine/arginine repetitive matrix 4, TECTA - tectorin alpha, SLC9A3R1 - solute carrier family 9, subfamily a (nhe3, cation proton antiporter 3), member 3 regulator 1, KCNQ4 - potassium voltage-gated channel, kqt-like subfamily, member 4, ROR1 - receptor tyrosine kinase-like orphan receptor 1, LRP2 - low density lipoprotein r…
GO:0050767	regulation of neurogenesis	3.2e-05	0.0128	1.42	121	[PARK2 - parkinson protein 2, e3 ubiquitin protein ligase (parkin), LRIG2 - leucine-rich repeats and immunoglobulin-like domains 2, RELN - reelin, MAGI2 - membrane associated guanylate kinase, ww and pdz domain containing 2, SEMA4C - sema domain, immunoglobulin domain (ig), transmembrane domain (tm) and short cytoplasmic domain, (semaphorin) 4c, TRAK1 - trafficking protein, kinesin binding 1, SPO…
GO:0045597	positive regulation of cell differentiation	3.21e-05	0.0125	1.38	137	[PARK2 - parkinson protein 2, e3 ubiquitin protein ligase (parkin), MAGI2 - membrane associated guanylate kinase, ww and pdz domain containing 2, RELN - reelin, PAX2 - paired box 2, TRAK1 - trafficking protein, kinesin binding 1, PLXNC1 - plexin c1, ATP8A2 - atpase, aminophospholipid transporter, class i, type 8a, member 2, DOCK5 - dedicator of cytokinesis 5, DCT - dopachrome tautomerase, IQGAP1 …
GO:0065007	biological regulation	3.26e-05	0.0124	1.07	1121	[AGAP1 - arfgap with gtpase domain, ankyrin repeat and ph domain 1, GFRA1 - gdnf family receptor alpha 1, GFRA2 - gdnf family receptor alpha 2, TMTC2 - transmembrane and tetratricopeptide repeat containing 2, AGAP3 - arfgap with gtpase domain, ankyrin repeat and ph domain 3, STARD3 - star-related lipid transfer (start) domain containing 3, ABCA1 - atp-binding cassette, sub-family a (abc1), member…
cytohesin 3, NOL11 - nucleolar protein 11, ZNF81 - zinc finger protein 81, BRIP1 - brca1 interacting protein c-terminal helicase 1, STRA8 - stimulated by retinoic acid 8, RPS6KA5 - ribosomal protein s6 kinase, 90kda, polypeptide 5, NCALD - neurocalcin delta, MAPKAPK2 - mitogen-activated protein kinase-activated protein kinase 2, CCL4 - chemokine (c-c motif) ligand 4, KLHL13 - kelch-like family me…
GO:0007156	homophilic cell adhesion via plasma membrane adhesion molecules	3.75e-05	0.0139	2.23	27	[CADM1 - cell adhesion molecule 1, CDH3 - cadherin 3, type 1, p-cadherin (placental), DSCAM - down syndrome cell adhesion molecule, IGSF9 - immunoglobulin superfamily, member 9, IGSF9B - immunoglobulin superfamily, member 9b, PTPRM - protein tyrosine phosphatase, receptor type, m, PTPRT - protein tyrosine phosphatase, receptor type, t, CDH23 - cadherin-related 23, CELSR1 - cadherin, egf lag seven…
GO:0030168	platelet activation	4.1e-05	0.0148	2.34	24	[PIK3R6 - phosphoinositide-3-kinase, regulatory subunit 6, DGKI - diacylglycerol kinase, iota, VAV3 - vav 3 guanine nucleotide exchange factor, TRPC7 - transient receptor potential cation channel, subfamily c, member 7, DGKK - diacylglycerol kinase, kappa, GNB1 - guanine nucleotide binding protein (g protein), beta polypeptide 1, MAPK1 - mitogen-activated protein kinase 1, ARRB2 - arrestin, beta …
GO:0044093	positive regulation of molecular function	4.49e-05	0.0159	1.28	218	[NCF2 - neutrophil cytosolic factor 2, TBC1D20 - tbc1 domain family, member 20, EMP2 - epithelial membrane protein 2, AGAP1 - arfgap with gtpase domain, ankyrin repeat and ph domain 1, IL18R1 - interleukin 18 receptor 1, FAM13A - family with sequence similarity 13, member a, AGAP3 - arfgap with gtpase domain, ankyrin repeat and ph domain 3, NDP - norrie disease (pseudoglioma), DOCK5 - dedicator o…
GO:1905114	cell surface receptor signaling pathway involved in cell-cell signaling	5.26e-05	0.0181	1.65	60	[AP2A2 - adaptor-related protein complex 2, alpha 2 subunit, TIAM1 - t-cell lymphoma invasion and metastasis 1, MAGI2 - membrane associated guanylate kinase, ww and pdz domain containing 2, NDP - norrie disease (pseudoglioma), AES - amino-terminal enhancer of split, CDH3 - cadherin 3, type 1, p-cadherin (placental), NKD1 - naked cuticle homolog 1 (drosophila), LGR6 - leucine-rich repeat containin…
GO:0050954	sensory perception of mechanical stimulus	6.52e-05	0.022	2.07	30	[LRIG2 - leucine-rich repeats and immunoglobulin-like domains 2, SRRM4 - serine/arginine repetitive matrix 4, TECTA - tectorin alpha, SLC9A3R1 - solute carrier family 9, subfamily a (nhe3, cation proton antiporter 3), member 3 regulator 1, KCNQ4 - potassium voltage-gated channel, kqt-like subfamily, member 4, ROR1 - receptor tyrosine kinase-like orphan receptor 1, LRP2 - low density lipoprotein r…
GO:0006816	calcium ion transport	6.81e-05	0.0224	1.76	47	[TRPM7 - transient receptor potential cation channel, subfamily m, member 7, PKD2 - polycystic kidney disease 2 (autosomal dominant), CACNG2 - calcium channel, voltage-dependent, gamma subunit 2, CCR7 - chemokine (c-c motif) receptor 7, ATP2B1 - atpase, ca++ transporting, plasma membrane 1, MCU - mitochondrial calcium uniporter, TRPC7 - transient receptor potential cation channel, subfamily c, me…
GO:0032793	positive regulation of CREB transcription factor activity	6.88e-05	0.0222	4.24	9	[CRTC1 - creb regulated transcription coactivator 1, RELN - reelin, RPS6KA5 - ribosomal protein s6 kinase, 90kda, polypeptide 5, VEGFA - vascular endothelial growth factor a, CAMK1D - calcium/calmodulin-dependent protein kinase id, ADCY8 - adenylate cyclase 8 (brain), LRP8 - low density lipoprotein receptor-related protein 8, apolipoprotein e receptor, ADCY1 - adenylate cyclase 1 (brain), PRKD1 -…
GO:0048731	system development	7.64e-05	0.0241	1.44	101	[PARK2 - parkinson protein 2, e3 ubiquitin protein ligase (parkin), RELN - reelin, PAX2 - paired box 2, GFRA1 - gdnf family receptor alpha 1, GFRA2 - gdnf family receptor alpha 2, NDP - norrie disease (pseudoglioma), INSC - inscuteable homolog (drosophila), FLT4 - fms-related tyrosine kinase 4, SPOCK1 - sparc/osteonectin, cwcv and kazal-like domains proteoglycan (testican) 1, POU6F2 - pou class 6…
GO:0090066	regulation of anatomical structure size	7.82e-05	0.0242	1.6	64	[FHOD3 - formin homology 2 domain containing 3, DEPTOR - dep domain containing mtor-interacting protein, VAV3 - vav 3 guanine nucleotide exchange factor, IQGAP2 - iq motif containing gtpase activating protein 2, PAX2 - paired box 2, ATP2B1 - atpase, ca++ transporting, plasma membrane 1, SLC6A4 - solute carrier family 6 (neurotransmitter transporter), member 4, DOCK4 - dedicator of cytokinesis 4, …
GO:0003008	system process	8.16e-05	0.0247	1.31	168	[LRIG2 - leucine-rich repeats and immunoglobulin-like domains 2, EMP2 - epithelial membrane protein 2, PARK2 - parkinson protein 2, e3 ubiquitin protein ligase (parkin), AFF2 - af4/fmr2 family, member 2, RELN - reelin, PAX2 - paired box 2, NDP - norrie disease (pseudoglioma), PNKD - paroxysmal nonkinesigenic dyskinesia, FLT4 - fms-related tyrosine kinase 4, STK40 - serine/threonine kinase 40, CDH…
GO:0010976	positive regulation of neuron projection development	8.33e-05	0.0247	1.69	52	[TIAM1 - t-cell lymphoma invasion and metastasis 1, PARK2 - parkinson protein 2, e3 ubiquitin protein ligase (parkin), RELN - reelin, MAGI2 - membrane associated guanylate kinase, ww and pdz domain containing 2, CAMK1D - calcium/calmodulin-dependent protein kinase id, TRAK1 - trafficking protein, kinesin binding 1, DSCAM - down syndrome cell adhesion molecule, PLXNC1 - plexin c1, ATP8A2 - atpase,…
GO:0016055	Wnt signaling pathway	9.19e-05	0.0267	1.63	58	[AP2A2 - adaptor-related protein complex 2, alpha 2 subunit, TIAM1 - t-cell lymphoma invasion and metastasis 1, MAGI2 - membrane associated guanylate kinase, ww and pdz domain containing 2, NDP - norrie disease (pseudoglioma), AES - amino-terminal enhancer of split, CDH3 - cadherin 3, type 1, p-cadherin (placental), NKD1 - naked cuticle homolog 1 (drosophila), LGR6 - leucine-rich repeat containin…
GO:0006928	movement of cell or subcellular component	9.4e-05	0.0268	1.3	172	[EMP2 - epithelial membrane protein 2, MDGA1 - mam domain containing glycosylphosphatidylinositol anchor 1, RELN - reelin, GFRA1 - gdnf family receptor alpha 1, GFRA2 - gdnf family receptor alpha 2, SEMA4C - sema domain, immunoglobulin domain (ig), transmembrane domain (tm) and short cytoplasmic domain, (semaphorin) 4c, AP3M2 - adaptor-related protein complex 3, mu 2 subunit, FLT1 - fms-related t…
GO:0060284	regulation of cell development	9.89e-05	0.0277	1.36	132	[LRIG2 - leucine-rich repeats and immunoglobulin-like domains 2, PARK2 - parkinson protein 2, e3 ubiquitin protein ligase (parkin), MAGI2 - membrane associated guanylate kinase, ww and pdz domain containing 2, RELN - reelin, SEMA4C - sema domain, immunoglobulin domain (ig), transmembrane domain (tm) and short cytoplasmic domain, (semaphorin) 4c, TRAK1 - trafficking protein, kinesin binding 1, DEN…
GO:0051094	positive regulation of developmental process	0.000113	0.031	1.3	176	[PARK2 - parkinson protein 2, e3 ubiquitin protein ligase (parkin), MAGI2 - membrane associated guanylate kinase, ww and pdz domain containing 2, GCM1 - glial cells missing homolog 1 (drosophila), RELN - reelin, PAX2 - paired box 2, FLT1 - fms-related tyrosine kinase 1, TRAK1 - trafficking protein, kinesin binding 1, PLXNC1 - plexin c1, ATP8A2 - atpase, aminophospholipid transporter, class i, typ…
GO:0019722	calcium-mediated signaling	0.000118	0.0317	2.04	29	[HPCA - hippocalcin, CCR7 - chemokine (c-c motif) receptor 7, MCU - mitochondrial calcium uniporter, RCAN1 - regulator of calcineurin 1, PTPRJ - protein tyrosine phosphatase, receptor type, j, CAMK2D - calcium/calmodulin-dependent protein kinase ii delta, AZU1 - azurocidin 1, CASQ2 - calsequestrin 2 (cardiac muscle), RCAN2 - regulator of calcineurin 2, EGFR - epidermal growth factor receptor, LRR…
GO:0050807	regulation of synapse organization	0.000123	0.0326	1.78	42	[TIAM1 - t-cell lymphoma invasion and metastasis 1, MDGA1 - mam domain containing glycosylphosphatidylinositol anchor 1, RELN - reelin, EEF2K - eukaryotic elongation factor-2 kinase, SLITRK5 - slit and ntrk-like family, member 5, SIPA1L1 - signal-induced proliferation-associated 1 like 1, GPC6 - glypican 6, PTPRO - protein tyrosine phosphatase, receptor type, o, PTPRS - protein tyrosine phosphata…
GO:0051962	positive regulation of nervous system development	0.000124	0.0323	1.48	83	[TIAM1 - t-cell lymphoma invasion and metastasis 1, PARK2 - parkinson protein 2, e3 ubiquitin protein ligase (parkin), MAGI2 - membrane associated guanylate kinase, ww and pdz domain containing 2, RELN - reelin, PAX2 - paired box 2, CAMK1D - calcium/calmodulin-dependent protein kinase id, TRAK1 - trafficking protein, kinesin binding 1, DSCAM - down syndrome cell adhesion molecule, ATP8A2 - atpase…
GO:0098657	import into cell	0.000128	0.0327	1.48	84	[AP2A2 - adaptor-related protein complex 2, alpha 2 subunit, NCF2 - neutrophil cytosolic factor 2, PARK2 - parkinson protein 2, e3 ubiquitin protein ligase (parkin), RABEP1 - rabaptin, rab gtpase binding effector protein 1, LOXL4 - lysyl oxidase-like 4, EPN2 - epsin 2, SLC6A4 - solute carrier family 6 (neurotransmitter transporter), member 4, FCHSD2 - fch and double sh3 domains 2, ADRBK1 - adrene…
GO:0065009	regulation of molecular function	0.000132	0.0332	1.19	333	[NCF2 - neutrophil cytosolic factor 2, TBC1D20 - tbc1 domain family, member 20, EMP2 - epithelial membrane protein 2, IL18R1 - interleukin 18 receptor 1, AGAP1 - arfgap with gtpase domain, ankyrin repeat and ph domain 1, FAM13A - family with sequence similarity 13, member a, ZFYVE28 - zinc finger, fyve domain containing 28, NDP - norrie disease (pseudoglioma), AGAP3 - arfgap with gtpase domain, a…
GO:0048468	cell development	0.000162	0.0399	1.44	93	[SYN1 - synapsin i, MAGI2 - membrane associated guanylate kinase, ww and pdz domain containing 2, MAEA - macrophage erythroblast attacher, XK - x-linked kx blood group (mcleod syndrome), PTPRS - protein tyrosine phosphatase, receptor type, s, ARID5B - at rich interactive domain 5b (mrf1-like), RFX2 - regulatory factor x, 2 (influences hla class ii expression), ATP8A2 - atpase, aminophospholipid t…
GO:0016310	phosphorylation	0.000194	0.0472	1.31	155	[RELN - reelin, GFRA1 - gdnf family receptor alpha 1, GFRA2 - gdnf family receptor alpha 2, FLT3 - fms-related tyrosine kinase 3, FLT1 - fms-related tyrosine kinase 1, FLT4 - fms-related tyrosine kinase 4, STK40 - serine/threonine kinase 40, ABI2 - abl-interactor 2, NCAM1 - neural cell adhesion molecule 1, GCK - glucokinase (hexokinase 4), ILF3 - interleukin enhancer binding factor 3, 90kda, KSR1…
GO:0050789	regulation of biological process	0.000205	0.0489	1.06	1054	[GFRA1 - gdnf family receptor alpha 1, GFRA2 - gdnf family receptor alpha 2, AGAP3 - arfgap with gtpase domain, ankyrin repeat and ph domain 3, ABCA1 - atp-binding cassette, sub-family a (abc1), member 1, GEM - gtp binding protein overexpressed in skeletal muscle, PDIA5 - protein disulfide isomerase family a, member 5, DOCK5 - dedicator of cytokinesis 5, GCNT2 - glucosaminyl (n-acetyl) transferas…
YDE2 - synapse defective 1, rho gtpase, homolog 2 (c. elegans), IL1RL1 - interleukin 1 receptor-like 1, LRRTM3 - leucine rich repeat transmembrane neuronal 3, PPP1R1B - protein phosphatase 1, regulatory (inhibitor) subunit 1b, TUBB2B - tubulin, beta 2b class iib, TPCN1 - two pore segment channel 1, CLIC5 - chloride intracellular channel 5, DAB1 - dab, reelin signal transducer, homolog 1 (drosophi…
GO:0051056	regulation of small GTPase mediated signal transduction	0.000214	0.0503	1.6	56	[TIAM1 - t-cell lymphoma invasion and metastasis 1, ARHGEF28 - rho guanine nucleotide exchange factor (gef) 28, MCF2L - mcf.2 cell line derived transforming sequence-like, RELN - reelin, VAV3 - vav 3 guanine nucleotide exchange factor, FAM13A - family with sequence similarity 13, member a, ARHGAP26 - rho gtpase activating protein 26, ABCA1 - atp-binding cassette, sub-family a (abc1), member 1, AR…
GO:0048518	positive regulation of biological process	0.000241	0.0557	1.11	633	[CREB5 - camp responsive element binding protein 5, AKAP12 - a kinase (prka) anchor protein 12, FBXO18 - f-box protein, helicase, 18, ABCA1 - atp-binding cassette, sub-family a (abc1), member 1, LIFR - leukemia inhibitory factor receptor alpha, CARD11 - caspase recruitment domain family, member 11, DOCK5 - dedicator of cytokinesis 5, NCOR2 - nuclear receptor corepressor 2, GCNT2 - glucosaminyl (n…
GO:0051122	hepoxilin biosynthetic process	0.000243	0.0554	8	4	[ALOX15B - arachidonate 15-lipoxygenase, type b, ALOXE3 - arachidonate lipoxygenase 3, ALOX15 - arachidonate 15-lipoxygenase, ALOX12B - arachidonate 12-lipoxygenase, 12r type]
GO:0051121	hepoxilin metabolic process	0.000243	0.0546	8	4	[ALOXE3 - arachidonate lipoxygenase 3, ALOX15B - arachidonate 15-lipoxygenase, type b, ALOX15 - arachidonate 15-lipoxygenase, ALOX12B - arachidonate 12-lipoxygenase, 12r type]
GO:0050773	regulation of dendrite development	0.000249	0.055	1.91	31	[TIAM1 - t-cell lymphoma invasion and metastasis 1, RELN - reelin, EEF2K - eukaryotic elongation factor-2 kinase, ANKRD27 - ankyrin repeat domain 27 (vps9 domain), SIPA1L1 - signal-induced proliferation-associated 1 like 1, CAMK1D - calcium/calmodulin-dependent protein kinase id, PTPRS - protein tyrosine phosphatase, receptor type, s, CAMK2B - calcium/calmodulin-dependent protein kinase ii beta, …
GO:0050769	positive regulation of neurogenesis	0.000254	0.0554	1.49	74	[TIAM1 - t-cell lymphoma invasion and metastasis 1, PARK2 - parkinson protein 2, e3 ubiquitin protein ligase (parkin), MAGI2 - membrane associated guanylate kinase, ww and pdz domain containing 2, RELN - reelin, CAMK1D - calcium/calmodulin-dependent protein kinase id, TRAK1 - trafficking protein, kinesin binding 1, DSCAM - down syndrome cell adhesion molecule, ATP8A2 - atpase, aminophospholipid t…
GO:0060998	regulation of dendritic spine development	0.000258	0.0553	2.34	19	[TIAM1 - t-cell lymphoma invasion and metastasis 1, RELN - reelin, EEF2K - eukaryotic elongation factor-2 kinase, SIPA1L1 - signal-induced proliferation-associated 1 like 1, PTPRS - protein tyrosine phosphatase, receptor type, s, SRCIN1 - src kinase signaling inhibitor 1, ARHGAP44 - rho gtpase activating protein 44, CAMK2B - calcium/calmodulin-dependent protein kinase ii beta, ABI2 - abl-interact…
GO:0031346	positive regulation of cell projection organization	0.000266	0.0563	1.54	63	[TIAM1 - t-cell lymphoma invasion and metastasis 1, PARK2 - parkinson protein 2, e3 ubiquitin protein ligase (parkin), RELN - reelin, MAGI2 - membrane associated guanylate kinase, ww and pdz domain containing 2, CAMK1D - calcium/calmodulin-dependent protein kinase id, TRAK1 - trafficking protein, kinesin binding 1, DSCAM - down syndrome cell adhesion molecule, PLXNC1 - plexin c1, ATP8A2 - atpase,…
GO:0048869	cellular developmental process	0.00032	0.0668	1.19	311	[MDGA1 - mam domain containing glycosylphosphatidylinositol anchor 1, TBC1D20 - tbc1 domain family, member 20, IL18R1 - interleukin 18 receptor 1, MAEA - macrophage erythroblast attacher, SEMA4C - sema domain, immunoglobulin domain (ig), transmembrane domain (tm) and short cytoplasmic domain, (semaphorin) 4c, INSC - inscuteable homolog (drosophila), TRAK1 - trafficking protein, kinesin binding 1,…
GO:0006468	protein phosphorylation	0.000381	0.0785	1.33	129	[RELN - reelin, GFRA1 - gdnf family receptor alpha 1, GFRA2 - gdnf family receptor alpha 2, FLT3 - fms-related tyrosine kinase 3, FLT1 - fms-related tyrosine kinase 1, FLT4 - fms-related tyrosine kinase 4, STK40 - serine/threonine kinase 40, ABI2 - abl-interactor 2, NCAM1 - neural cell adhesion molecule 1, ILF3 - interleukin enhancer binding factor 3, 90kda, CAMKK2 - calcium/calmodulin-dependent …
GO:0045666	positive regulation of neuron differentiation	0.000387	0.0786	1.54	60	[TIAM1 - t-cell lymphoma invasion and metastasis 1, PARK2 - parkinson protein 2, e3 ubiquitin protein ligase (parkin), RELN - reelin, MAGI2 - membrane associated guanylate kinase, ww and pdz domain containing 2, CAMK1D - calcium/calmodulin-dependent protein kinase id, TRAK1 - trafficking protein, kinesin binding 1, DSCAM - down syndrome cell adhesion molecule, PLXNC1 - plexin c1, ATP8A2 - atpase,…
GO:0070838	divalent metal ion transport	0.000401	0.0804	1.6	51	[TMEM163 - transmembrane protein 163, TRPC7 - transient receptor potential cation channel, subfamily c, member 7, ATP2B1 - atpase, ca++ transporting, plasma membrane 1, ATP2A3 - atpase, ca++ transporting, ubiquitous, SLC24A2 - solute carrier family 24 (sodium/potassium/calcium exchanger), member 2, PSEN1 - presenilin 1, GCK - glucokinase (hexokinase 4), VDR - vitamin d (1,25- dihydroxyvitamin d3)…
GO:0050790	regulation of catalytic activity	0.000402	0.0795	1.2	262	[NCF2 - neutrophil cytosolic factor 2, TBC1D20 - tbc1 domain family, member 20, EMP2 - epithelial membrane protein 2, AGAP1 - arfgap with gtpase domain, ankyrin repeat and ph domain 1, FAM13A - family with sequence similarity 13, member a, ZFYVE28 - zinc finger, fyve domain containing 28, AGAP3 - arfgap with gtpase domain, ankyrin repeat and ph domain 3, PLXNC1 - plexin c1, SPOCK1 - sparc/osteone…
GO:0006002	fructose 6-phosphate metabolic process	0.000405	0.079	4.31	7	[PFKL - phosphofructokinase, liver, GFPT2 - glutamine-fructose-6-phosphate transaminase 2, PFKM - phosphofructokinase, muscle, HK1 - hexokinase 1, PFKP - phosphofructokinase, platelet, HK2 - hexokinase 2, TALDO1 - transaldolase 1]
GO:0032879	regulation of localization	0.000406	0.0782	1.18	317	[TBC1D20 - tbc1 domain family, member 20, EMP2 - epithelial membrane protein 2, CTNNA3 - catenin (cadherin-associated protein), alpha 3, SEMA4C - sema domain, immunoglobulin domain (ig), transmembrane domain (tm) and short cytoplasmic domain, (semaphorin) 4c, AKAP12 - a kinase (prka) anchor protein 12, PLXNC1 - plexin c1, ABCA1 - atp-binding cassette, sub-family a (abc1), member 1, GEM - gtp bind…
GO:0048522	positive regulation of cellular process	0.000416	0.079	1.12	570	[CREB5 - camp responsive element binding protein 5, AKAP12 - a kinase (prka) anchor protein 12, FBXO18 - f-box protein, helicase, 18, ABCA1 - atp-binding cassette, sub-family a (abc1), member 1, LIFR - leukemia inhibitory factor receptor alpha, CARD11 - caspase recruitment domain family, member 11, DOCK5 - dedicator of cytokinesis 5, GCNT2 - glucosaminyl (n-acetyl) transferase 2, i-branching enzy…
GO:0010769	regulation of cell morphogenesis involved in differentiation	0.000428	0.0804	1.59	52	[TIAM1 - t-cell lymphoma invasion and metastasis 1, RELN - reelin, SEMA4C - sema domain, immunoglobulin domain (ig), transmembrane domain (tm) and short cytoplasmic domain, (semaphorin) 4c, PTPRO - protein tyrosine phosphatase, receptor type, o, TRAK1 - trafficking protein, kinesin binding 1, XK - x-linked kx blood group (mcleod syndrome), DSCAM - down syndrome cell adhesion molecule, PTPRS - pro…
GO:0006796	phosphate-containing compound metabolic process	0.000464	0.0859	1.21	247	[ELOVL2 - elovl fatty acid elongase 2, GFRA1 - gdnf family receptor alpha 1, GFRA2 - gdnf family receptor alpha 2, ABI2 - abl-interactor 2, CARD11 - caspase recruitment domain family, member 11, INPP4B - inositol polyphosphate-4-phosphatase, type ii, 105kda, SLC25A13 - solute carrier family 25 (aspartate/glutamate carrier), member 13, NCAM1 - neural cell adhesion molecule 1, AGPAT3 - 1-acylglycer…
GO:0048167	regulation of synaptic plasticity	0.000465	0.085	1.77	35	[RELN - reelin, SORCS2 - sortilin-related vps10 domain containing receptor 2, SIPA1L1 - signal-induced proliferation-associated 1 like 1, CAMK2B - calcium/calmodulin-dependent protein kinase ii beta, NTRK2 - neurotrophic tyrosine kinase, receptor, type 2, ITPR3 - inositol 1,4,5-trisphosphate receptor, type 3, PICK1 - protein interacting with prkca 1, SHANK3 - sh3 and multiple ankyrin repeat domai…
GO:0098742	cell-cell adhesion via plasma-membrane adhesion molecules	0.000466	0.0843	1.74	37	[CADM1 - cell adhesion molecule 1, GPC6 - glypican 6, CDH3 - cadherin 3, type 1, p-cadherin (placental), PTPRS - protein tyrosine phosphatase, receptor type, s, DSCAM - down syndrome cell adhesion molecule, IGSF9 - immunoglobulin superfamily, member 9, PTPRM - protein tyrosine phosphatase, receptor type, m, IGSF9B - immunoglobulin superfamily, member 9b, CLDN16 - claudin 16, PTPRT - protein tyros…
GO:0009653	anatomical structure morphogenesis	0.000496	0.0886	1.26	178	[TBC1D20 - tbc1 domain family, member 20, RELN - reelin, GCM1 - glial cells missing homolog 1 (drosophila), PAX2 - paired box 2, NDP - norrie disease (pseudoglioma), FLT1 - fms-related tyrosine kinase 1, FLT4 - fms-related tyrosine kinase 4, TRAK1 - trafficking protein, kinesin binding 1, STK40 - serine/threonine kinase 40, CDH3 - cadherin 3, type 1, p-cadherin (placental), ANKRD11 - ankyrin repe…
GO:0097061	dendritic spine organization	0.000497	0.0877	3.2	10	[PICK1 - protein interacting with prkca 1, SHANK3 - sh3 and multiple ankyrin repeat domains 3, IGF1R - insulin-like growth factor 1 receptor, INSR - insulin receptor, SHANK2 - sh3 and multiple ankyrin repeat domains 2, EPHB2 - eph receptor b2, FYN - fyn oncogene related to src, fgr, yes, EPHB1 - eph receptor b1, CTNND2 - catenin (cadherin-associated protein), delta 2, PAK3 - p21 protein (cdc42/ra…
GO:0050805	negative regulation of synaptic transmission	0.000521	0.0909	2.42	16	[PARK2 - parkinson protein 2, e3 ubiquitin protein ligase (parkin), ASIC1 - acid-sensing (proton-gated) ion channel 1, CD38 - cd38 molecule, CELF4 - cugbp, elav-like family member 4, GRIK2 - glutamate receptor, ionotropic, kainate 2, PNKD - paroxysmal nonkinesigenic dyskinesia, GRIK3 - glutamate receptor, ionotropic, kainate 3, SORCS2 - sortilin-related vps10 domain containing receptor 2, SLC6A4 …
GO:0048013	ephrin receptor signaling pathway	0.000524	0.0904	2.13	21	[ARHGEF28 - rho guanine nucleotide exchange factor (gef) 28, TIAM1 - t-cell lymphoma invasion and metastasis 1, AP2A2 - adaptor-related protein complex 2, alpha 2 subunit, EPHA6 - eph receptor a6, GRIN2B - glutamate receptor, ionotropic, n-methyl d-aspartate 2b, VAV3 - vav 3 guanine nucleotide exchange factor, EPHB2 - eph receptor b2, SIPA1L1 - signal-induced proliferation-associated 1 like 1, EP…
GO:0035249	synaptic transmission, glutamatergic	0.000539	0.0919	2.82	12	[NAPB - n-ethylmaleimide-sensitive factor attachment protein, beta, PARK2 - parkinson protein 2, e3 ubiquitin protein ligase (parkin), GRIN2B - glutamate receptor, ionotropic, n-methyl d-aspartate 2b, ADORA2A - adenosine a2a receptor, GRIK2 - glutamate receptor, ionotropic, kainate 2, CDH8 - cadherin 8, type 2, GRIK3 - glutamate receptor, ionotropic, kainate 3, GRID1 - glutamate receptor, ionotro…
GO:0051345	positive regulation of hydrolase activity	0.000572	0.0964	1.37	99	[TBC1D20 - tbc1 domain family, member 20, AGAP1 - arfgap with gtpase domain, ankyrin repeat and ph domain 1, MAGI2 - membrane associated guanylate kinase, ww and pdz domain containing 2, FAM13A - family with sequence similarity 13, member a, AGAP3 - arfgap with gtpase domain, ankyrin repeat and ph domain 3, FLT1 - fms-related tyrosine kinase 1, RIN2 - ras and rab interactor 2, DOCK5 - dedicator o…
GO:0051049	regulation of transport	0.00058	0.0967	1.22	219	[TBC1D20 - tbc1 domain family, member 20, AKAP12 - a kinase (prka) anchor protein 12, ABCA1 - atp-binding cassette, sub-family a (abc1), member 1, GEM - gtp binding protein overexpressed in skeletal muscle, ABR - active bcr-related, HRC - histidine rich calcium binding protein, RDX - radixin, SHANK2 - sh3 and multiple ankyrin repeat domains 2, REST - re1-silencing transcription factor, GCK - gluc…
GO:0072511	divalent inorganic cation transport	0.000586	0.0965	1.58	51	[TMEM163 - transmembrane protein 163, TRPC7 - transient receptor potential cation channel, subfamily c, member 7, ATP2B1 - atpase, ca++ transporting, plasma membrane 1, ATP2A3 - atpase, ca++ transporting, ubiquitous, SLC24A2 - solute carrier family 24 (sodium/potassium/calcium exchanger), member 2, PSEN1 - presenilin 1, GCK - glucokinase (hexokinase 4), VDR - vitamin d (1,25- dihydroxyvitamin d3)…
GO:0006793	phosphorus metabolic process	0.000626	0.102	1.2	249	[ELOVL2 - elovl fatty acid elongase 2, GFRA1 - gdnf family receptor alpha 1, GFRA2 - gdnf family receptor alpha 2, ABI2 - abl-interactor 2, CARD11 - caspase recruitment domain family, member 11, INPP4B - inositol polyphosphate-4-phosphatase, type ii, 105kda, SLC25A13 - solute carrier family 25 (aspartate/glutamate carrier), member 13, NCAM1 - neural cell adhesion molecule 1, AGPAT3 - 1-acylglycer…
GO:0070588	calcium ion transmembrane transport	0.000662	0.107	1.71	37	[TRPM7 - transient receptor potential cation channel, subfamily m, member 7, CACNG2 - calcium channel, voltage-dependent, gamma subunit 2, PKD2 - polycystic kidney disease 2 (autosomal dominant), CCR7 - chemokine (c-c motif) receptor 7, MCU - mitochondrial calcium uniporter, TRPC7 - transient receptor potential cation channel, subfamily c, member 7, RASA3 - ras p21 protein activator 3, ATP2A3 - a…
GO:0051270	regulation of cellular component movement	0.000682	0.109	1.31	127	[LRIG2 - leucine-rich repeats and immunoglobulin-like domains 2, EMP2 - epithelial membrane protein 2, MAGI2 - membrane associated guanylate kinase, ww and pdz domain containing 2, RELN - reelin, CTNNA3 - catenin (cadherin-associated protein), alpha 3, SEMA4C - sema domain, immunoglobulin domain (ig), transmembrane domain (tm) and short cytoplasmic domain, (semaphorin) 4c, FLT1 - fms-related tyro…
GO:0044087	regulation of cellular component biogenesis	0.000722	0.114	1.31	124	[PARK2 - parkinson protein 2, e3 ubiquitin protein ligase (parkin), MDGA1 - mam domain containing glycosylphosphatidylinositol anchor 1, SPIRE1 - spire actin nucleation factor 1, FCHSD2 - fch and double sh3 domains 2, ELN - elastin, ABCA1 - atp-binding cassette, sub-family a (abc1), member 1, ABI2 - abl-interactor 2, PLEKHM1 - pleckstrin homology domain containing, family m (with run domain) memb…
GO:0099173	postsynapse organization	0.000728	0.114	2.74	12	[PICK1 - protein interacting with prkca 1, SHANK3 - sh3 and multiple ankyrin repeat domains 3, ACTN1 - actinin, alpha 1, IGF1R - insulin-like growth factor 1 receptor, CNKSR2 - connector enhancer of kinase suppressor of ras 2, INSR - insulin receptor, SHANK2 - sh3 and multiple ankyrin repeat domains 2, EPHB2 - eph receptor b2, FYN - fyn oncogene related to src, fgr, yes, EPHB1 - eph receptor b1, …
GO:0050794	regulation of cellular process	0.000755	0.117	1.06	991	[GFRA1 - gdnf family receptor alpha 1, AGAP3 - arfgap with gtpase domain, ankyrin repeat and ph domain 3, GFRA2 - gdnf family receptor alpha 2, ABCA1 - atp-binding cassette, sub-family a (abc1), member 1, GEM - gtp binding protein overexpressed in skeletal muscle, PDIA5 - protein disulfide isomerase family a, member 5, DOCK5 - dedicator of cytokinesis 5, ABCA4 - atp-binding cassette, sub-family a…
- mutated in colorectal cancers, HELZ2 - helicase with zinc finger 2, transcriptional coactivator, SYT7 - synaptotagmin vii, GSG1L - gsg1-like, IL34 - interleukin 34, DLG2 - discs, large homolog 2 (drosophila), KCNG2 - potassium voltage-gated channel, subfamily g, member 2, SH2D2A - sh2 domain containing 2a, LRP2 - low density lipoprotein receptor-related protein 2, ZFAT - zinc finger and at hook…
GO:0022604	regulation of cell morphogenesis	0.000776	0.119	1.43	74	[TIAM1 - t-cell lymphoma invasion and metastasis 1, PARK2 - parkinson protein 2, e3 ubiquitin protein ligase (parkin), RELN - reelin, SEMA4C - sema domain, immunoglobulin domain (ig), transmembrane domain (tm) and short cytoplasmic domain, (semaphorin) 4c, PTPRO - protein tyrosine phosphatase, receptor type, o, XK - x-linked kx blood group (mcleod syndrome), TRAK1 - trafficking protein, kinesin b…
GO:0007205	protein kinase C-activating G protein-coupled receptor signaling pathway	0.000784	0.119	3.27	9	[PARD3 - par-3 partitioning defective 3 homolog (c. elegans), DGKH - diacylglycerol kinase, eta, PICK1 - protein interacting with prkca 1, DGKI - diacylglycerol kinase, iota, ADORA2A - adenosine a2a receptor, DGKK - diacylglycerol kinase, kappa, GAP43 - growth associated protein 43, DGKD - diacylglycerol kinase, delta 130kda, AZU1 - azurocidin 1]
GO:0021795	cerebral cortex cell migration	0.0008	0.12	3.56	8	[ARX - aristaless related homeobox, EGFR - epidermal growth factor receptor, RELN - reelin, FGF13 - fibroblast growth factor 13, PSEN1 - presenilin 1, LHX6 - lim homeobox 6, DISC1 - disrupted in schizophrenia 1, EFHC1 - ef-hand domain (c-terminal) containing 1]
GO:0001775	cell activation	0.000805	0.119	1.31	121	[IL18R1 - interleukin 18 receptor 1, FLT3 - fms-related tyrosine kinase 3, ELF4 - e74-like factor 4 (ets domain transcription factor), AKAP12 - a kinase (prka) anchor protein 12, BLNK - b-cell linker, BPI - bactericidal/permeability-increasing protein, CARD11 - caspase recruitment domain family, member 11, IQGAP1 - iq motif containing gtpase activating protein 1, LCP2 - lymphocyte cytosolic prote…
GO:0051128	regulation of cellular component organization	0.000832	0.122	1.18	295	[MDGA1 - mam domain containing glycosylphosphatidylinositol anchor 1, SEMA4C - sema domain, immunoglobulin domain (ig), transmembrane domain (tm) and short cytoplasmic domain, (semaphorin) 4c, SPIRE1 - spire actin nucleation factor 1, TRAK1 - trafficking protein, kinesin binding 1, ELN - elastin, PLXNC1 - plexin c1, SPOCK1 - sparc/osteonectin, cwcv and kazal-like domains proteoglycan (testican) 1…
GO:0034329	cell junction assembly	0.000852	0.124	1.77	32	[ACTN1 - actinin, alpha 1, PTPRO - protein tyrosine phosphatase, receptor type, o, CDH3 - cadherin 3, type 1, p-cadherin (placental), PTPRK - protein tyrosine phosphatase, receptor type, k, VMP1 - vacuole membrane protein 1, TLN1 - talin 1, CDH23 - cadherin-related 23, JAM3 - junctional adhesion molecule 3, CD9 - cd9 molecule, NFASC - neurofascin, CTNND2 - catenin (cadherin-associated protein), d…
GO:0007399	nervous system development	0.000855	0.123	1.6	45	[LSAMP - limbic system-associated membrane protein, SRRM4 - serine/arginine repetitive matrix 4, ZNF423 - zinc finger protein 423, GFRA1 - gdnf family receptor alpha 1, GFRA2 - gdnf family receptor alpha 2, NDP - norrie disease (pseudoglioma), FGF13 - fibroblast growth factor 13, POFUT1 - protein o-fucosyltransferase 1, ROR1 - receptor tyrosine kinase-like orphan receptor 1, ATXN1 - ataxin 1, INS…
GO:0006636	unsaturated fatty acid biosynthetic process	0.000868	0.124	2.84	11	[ELOVL2 - elovl fatty acid elongase 2, ALOXE3 - arachidonate lipoxygenase 3, ALOX15B - arachidonate 15-lipoxygenase, type b, ALOX15 - arachidonate 15-lipoxygenase, ALOX5 - arachidonate 5-lipoxygenase, FADS2 - fatty acid desaturase 2, ALOX12B - arachidonate 12-lipoxygenase, 12r type, DEGS1 - delta(4)-desaturase, sphingolipid 1, PTGDS - prostaglandin d2 synthase 21kda (brain), ELOVL6 - elovl fatty …
GO:0106027	neuron projection organization	0.000868	0.123	2.84	11	[PICK1 - protein interacting with prkca 1, SHANK3 - sh3 and multiple ankyrin repeat domains 3, IGF1R - insulin-like growth factor 1 receptor, INSR - insulin receptor, PSEN1 - presenilin 1, SHANK2 - sh3 and multiple ankyrin repeat domains 2, EPHB2 - eph receptor b2, FYN - fyn oncogene related to src, fgr, yes, EPHB1 - eph receptor b1, CTNND2 - catenin (cadherin-associated protein), delta 2, PAK3 -…
GO:0051241	negative regulation of multicellular organismal process	0.000908	0.127	1.27	148	[LRIG2 - leucine-rich repeats and immunoglobulin-like domains 2, IL18R1 - interleukin 18 receptor 1, PAX2 - paired box 2, SEMA4C - sema domain, immunoglobulin domain (ig), transmembrane domain (tm) and short cytoplasmic domain, (semaphorin) 4c, CDH3 - cadherin 3, type 1, p-cadherin (placental), DENND5A - denn/madd domain containing 5a, BPI - bactericidal/permeability-increasing protein, SPOCK1 - …
GO:0019220	regulation of phosphate metabolic process	0.00092	0.127	1.22	210	[EMP2 - epithelial membrane protein 2, ZFYVE28 - zinc finger, fyve domain containing 28, GFRA2 - gdnf family receptor alpha 2, SEMA4C - sema domain, immunoglobulin domain (ig), transmembrane domain (tm) and short cytoplasmic domain, (semaphorin) 4c, AKAP12 - a kinase (prka) anchor protein 12, FBXO18 - f-box protein, helicase, 18, IQGAP1 - iq motif containing gtpase activating protein 1, GCNT2 - g…
GO:0097553	calcium ion transmembrane import into cytosol	0.000925	0.127	2.18	18	[PKD2 - polycystic kidney disease 2 (autosomal dominant), RYR2 - ryanodine receptor 2 (cardiac), CCR7 - chemokine (c-c motif) receptor 7, GRIN2B - glutamate receptor, ionotropic, n-methyl d-aspartate 2b, RASA3 - ras p21 protein activator 3, CACNA2D1 - calcium channel, voltage-dependent, alpha 2/delta subunit 1, FAM155A - family with sequence similarity 155, member a, PLCE1 - phospholipase c, epsi…
GO:0016477	cell migration	0.000942	0.128	1.34	106	[MDGA1 - mam domain containing glycosylphosphatidylinositol anchor 1, EMP2 - epithelial membrane protein 2, RELN - reelin, SEMA4C - sema domain, immunoglobulin domain (ig), transmembrane domain (tm) and short cytoplasmic domain, (semaphorin) 4c, FLT1 - fms-related tyrosine kinase 1, SPOCK1 - sparc/osteonectin, cwcv and kazal-like domains proteoglycan (testican) 1, ABI2 - abl-interactor 2, DOCK5 -…
GO:0003013	circulatory system process	0.00095	0.128	1.71	35	[CRP - c-reactive protein, pentraxin-related, CTNNBIP1 - catenin, beta interacting protein 1, ATP2B1 - atpase, ca++ transporting, plasma membrane 1, DOCK4 - dedicator of cytokinesis 4, SLC6A4 - solute carrier family 6 (neurotransmitter transporter), member 4, RCAN1 - regulator of calcineurin 1, PTPRJ - protein tyrosine phosphatase, receptor type, j, AKAP12 - a kinase (prka) anchor protein 12, ELN…
GO:0051174	regulation of phosphorus metabolic process	0.000955	0.128	1.22	210	[EMP2 - epithelial membrane protein 2, ZFYVE28 - zinc finger, fyve domain containing 28, GFRA2 - gdnf family receptor alpha 2, SEMA4C - sema domain, immunoglobulin domain (ig), transmembrane domain (tm) and short cytoplasmic domain, (semaphorin) 4c, AKAP12 - a kinase (prka) anchor protein 12, FBXO18 - f-box protein, helicase, 18, IQGAP1 - iq motif containing gtpase activating protein 1, GCNT2 - g…
