# Supplementary material for: Weaning Induces Stress-Dependent DNA Methylation and Transcriptional Changes in Piglet PBMCs
Source: Front Genet. 2021 Feb 5;12:633564. doi: 10.3389/fgene.2021.633564 (PMC7893110; doi:10.3389/fgene.2021.633564)
Supplement: Supplementary file 7 [file Table_5.XLSX]

## Sheet: TableS5
Table S5. PBMC RNA-Sequencing Read Summary
Sample ID	No. Raw Reads	% Trimmed	% Uniquely Aligned
98-8_Pre	108119016	99.9839	51.9713
98-8_Post	69009261	99.9885	52.7178
98-19_Pre	85203141	99.9877	52.857
98-19_Post	95056244	99.9866	49.2671
102-1_Pre	75870039	99.9878	55.7452
102-1_Post	95187993	99.9846	52.3307
102-9_Pre	95458301	99.9861	51.1282
102-9_Post	75575119	99.987	52.213
98-7_Pre	64258319	99.9744	64.8994
98-7_Post	72477865	99.9889	67.3836
98-9_Pre	75632223	99.9781	63.5972
98-9_Post	61798005	99.9758	62.7221
102-6_Pre	62488241	99.9821	66.593
102-6_Post	65092215	99.9745	60.1018
102-7_Pre	72732496	99.9854	53.9962
102-7_Post	64944140	99.9809	64.0561
102-8_Pre	107578353	99.9171	69.2695
102-8_Post	62706578	99.9871	64.5689
