# Supplementary material for: Weaning Induces Stress-Dependent DNA Methylation and Transcriptional Changes in Piglet PBMCs
Source: Front Genet. 2021 Feb 5;12:633564. doi: 10.3389/fgene.2021.633564 (PMC7893110; doi:10.3389/fgene.2021.633564)
Supplement: Supplementary file 8 [file Table_6.XLSX]

## Sheet: TableS6
Table S6. Differential Expression Analysis results (post- versus pre-weaning) for all animals, LS animals, HS animals, and animals with methylation data
		All Animals						LS Animals						HS Animals						Methylation Animals
Gene ID	Gene Name	baseMean	log2FoldChange	lfcSE	stat	pvalue	FDR	baseMean	log2FoldChange	lfcSE	stat	pvalue	FDR	baseMean	log2FoldChange	lfcSE	stat	pvalue	FDR	baseMean	log2FoldChange	lfcSE	stat	pvalue	FDR
ENSSSCG00000000002		31.3112	-0.588679	0.215392	-2.73306	0.00627483	0.0539132	32.8734	-0.311108	0.460992	-0.674867	0.49976	0.989825	31.4599	-0.494337	0.598764	-0.825595	0.409034	0.930669	32.185	-0.397296	0.295875	-1.34278	0.179342	0.599303
ENSSSCG00000000003	TTC38	789.563	0.0726288	0.0786494	0.92345	0.355773	0.614605	736.823	0.0722368	0.183622	0.3934	0.694024	0.995655	771.665	0.0816468	0.20619	0.395979	0.69212	0.979182	753.18	0.0841245	0.120193	0.699914	0.483981	0.83036
ENSSSCG00000000005	CDPF1	93.8151	-0.0664124	0.215045	-0.308829	0.757451	0.883745	73.4499	-0.176901	0.409214	-0.432295	0.665527	0.995655	71.1402	0.678057	0.510627	1.32789	0.184214	0.82845	72.3342	0.152988	0.329447	0.464378	0.642377	0.90275
ENSSSCG00000000006	PPARA	54.3933	0.125748	0.196234	0.640809	0.521647	0.741883	44.0555	0.294281	0.536773	0.548241	0.583526	0.993215	45.4692	0.0204418	0.421736	0.0484707	0.961341	0.998498	44.7155	0.213133	0.322314	0.66126	0.508446	0.842947
ENSSSCG00000000007	TRMU	138.146	-0.0648208	0.123919	-0.523088	0.600913	0.793763	140.15	0.0755222	0.26961	0.280117	0.779388	0.995655	132.685	-0.0814633	0.275191	-0.296025	0.767211	0.986341	136.563	0.0016752	0.149548	0.0112018	0.991062	0.998039
ENSSSCG00000000010	FBLN1	71.1959	0.038091	0.352402	0.10809	0.913925	0.960175	46.4218	-0.172557	0.412339	-0.418483	0.675594	0.995655	88.976	-1.25725	0.69546	-1.8078	0.0706381	0.682026	66.6713	-0.748499	0.435142	-1.72013	0.0854094	0.455139
ENSSSCG00000000014	FAM118A	17.0723	-0.0195663	0.330872	-0.0591354	0.952844	0.976474	14.5243	-1.01674	0.69399	-1.46506	0.142903	0.842923	14.5325	0.567971	0.920386	0.617101	0.537168	0.962346	14.5269	-0.251635	0.515883	-0.487775	0.625709	0.897246
ENSSSCG00000000018	KIAA0930	2353.77	0.00489939	0.175947	0.0278458	0.977785	0.988099	1763.11	-0.049213	0.222399	-0.221282	0.824873	0.99681	2239.82	-0.444138	0.27813	-1.59688	0.110294	0.744567	1989.17	-0.258733	0.174035	-1.48667	0.137103	0.540233
ENSSSCG00000000019	NUP50	14284.5	0.0414023	0.151309	0.273628	0.784371	0.896462	14153	0.0239423	0.263878	0.0907324	0.927705	0.998795	13913.8	0.575549	0.40249	1.42997	0.152726	0.808746	14036.3	0.280734	0.250765	1.11951	0.262922	0.679205
ENSSSCG00000000022	RTL6	575.454	-0.253964	0.127297	-1.99505	0.046037	0.195419	421.213	-0.334692	0.351381	-0.952504	0.340841	0.967942	429.13	-0.179211	0.417302	-0.429451	0.667595	0.978874	424.817	-0.257172	0.265708	-0.967876	0.333107	0.737508
ENSSSCG00000000024	PARVB	7147.58	0.388949	0.27898	1.39418	0.163263	0.408648	5802.43	0.0534473	0.168882	0.316476	0.751641	0.995655	7200.33	-0.341207	0.37337	-0.913856	0.360793	0.920068	6466.95	-0.157366	0.205646	-0.76523	0.444135	0.80712
ENSSSCG00000000025		3093.21	-0.039793	0.0847257	-0.469668	0.638592	0.815003	2860.49	-0.158299	0.167622	-0.944381	0.344975	0.967942	2839.4	0.0727137	0.201369	0.361097	0.718027	0.983197	2849.85	-0.0478799	0.112108	-0.427086	0.669317	0.91149
ENSSSCG00000000031	MCAT	91.9555	-0.047607	0.152419	-0.312342	0.754781	0.882798	104.349	0.16633	0.30694	0.541898	0.587889	0.993215	87.6408	0.0778319	0.324111	0.24014	0.810222	0.988618	96.373	0.117668	0.201483	0.584009	0.559214	0.866609
ENSSSCG00000000033	TSPO	2125.87	0.310388	0.126585	2.45201	0.014206	0.0935084	2470.15	0.108507	0.303733	0.357243	0.72091	0.995655	2046.49	0.496431	0.347655	1.42794	0.153309	0.809276	2268.39	0.295796	0.282928	1.04548	0.2958	0.7067
ENSSSCG00000000034	TTLL12	1403.23	0.119704	0.0834901	1.43375	0.151645	0.392392	1299.41	0.163809	0.174393	0.939311	0.347571	0.967942	1265.77	0.0946261	0.205456	0.460567	0.645109	0.976787	1283.13	0.132522	0.111962	1.18364	0.236557	0.656118
ENSSSCG00000000035	TTLL1	207.244	0.0641514	0.146326	0.438413	0.661087	0.828443	218.007	0.348696	0.448984	0.776635	0.437374	0.983944	197.936	0.154029	0.411324	0.374471	0.708054	0.981374	208.424	0.253925	0.385348	0.658951	0.509927	0.843973
ENSSSCG00000000036	PACSIN2	2033.09	0.0490851	0.0907269	0.54102	0.588494	0.785767	1805.24	0.234279	0.184728	1.26824	0.204713	0.908711	2139.33	0.0315036	0.203786	0.154591	0.877143	0.99083	1963.79	0.128073	0.148813	0.860633	0.38944	0.776233
ENSSSCG00000000037	ARFGAP3	1483.23	-0.0575985	0.0847133	-0.679923	0.496553	0.723511	1125.09	-0.123532	0.184846	-0.668298	0.503943	0.989825	1158.54	-0.0959305	0.204986	-0.467984	0.639796	0.976787	1140.66	-0.10738	0.11435	-0.939043	0.347709	0.747686
ENSSSCG00000000038	CYB5R3	487.023	0.0559693	0.116979	0.478457	0.632325	0.811921	387.344	-0.00164952	0.22515	-0.00732632	0.994154	0.999052	419.068	-0.136223	0.364252	-0.373981	0.708419	0.981374	402.383	-0.072362	0.190155	-0.380543	0.703543	0.925485
ENSSSCG00000000039	POLDIP3	2278.84	-0.0582355	0.0592661	-0.98261	0.325799	0.588692	1977.28	-0.00738708	0.177054	-0.0417222	0.96672	0.998818	2201.43	-0.119083	0.18425	-0.646312	0.518077	0.959218	2083.37	-0.0627398	0.0903946	-0.694066	0.487641	0.832644
ENSSSCG00000000040	SEPTIN3	1273.44	0.20464	0.17516	1.1683	0.242685	0.50772	842.243	0.212962	0.239473	0.889294	0.373845	0.973266	974.256	0.283562	0.41814	0.67815	0.497677	0.955397	904.915	0.248692	0.228614	1.08783	0.276671	0.691244
ENSSSCG00000000045	NDUFA6	232.653	0.00177748	0.142067	0.0125116	0.990017	0.993899	252.272	0.0336546	0.215972	0.155829	0.876168	0.998795	261.426	0.151	0.267498	0.564488	0.572422	0.966659	256.562	0.0926455	0.126297	0.733551	0.463222	0.818305
ENSSSCG00000000046	CYP2D25	63.3585	0.0925664	0.25695	0.360251	0.718659	0.863052	57.4668	-0.198013	0.396131	-0.499867	0.617169	0.99491	63.5082	0.318515	0.64218	0.49599	0.619901	0.971782	60.3293	0.0505279	0.342996	0.147314	0.882884	0.979118
ENSSSCG00000000050	NAGA	1287.25	0.177779	0.0794548	2.23748	0.0252549	0.133609	1148.75	0.119191	0.177695	0.670766	0.50237	0.989825	1308.8	0.250392	0.228584	1.09541	0.273339	0.899985	1224.64	0.187583	0.109945	1.70616	0.0879786	0.461458
ENSSSCG00000000058	SNU13	2930.85	-0.0162962	0.115931	-0.140567	0.888212	0.948421	2724.51	-0.145383	0.164705	-0.882683	0.377407	0.974862	2732.63	0.110899	0.238328	0.465322	0.641701	0.976787	2727.55	-0.0231511	0.125937	-0.18383	0.854147	0.971925
ENSSSCG00000000059	XRCC6	603.522	0.0876892	0.123201	0.711757	0.476615	0.710627	553.695	0.00346365	0.231178	0.0149826	0.988046	0.999052	597.669	-0.100771	0.263245	-0.382802	0.701867	0.980743	574.403	-0.0467121	0.165451	-0.282331	0.77769	0.948666
ENSSSCG00000000061	PMM1	212.025	0.0970968	0.15544	0.624658	0.532196	0.749579	201.31	0.0953772	0.269048	0.354499	0.722965	0.995655	227.506	-0.16556	0.333358	-0.496644	0.61944	0.971782	213.746	-0.0202071	0.187219	-0.107933	0.914049	0.986306
ENSSSCG00000000062	CSDC2	33.878	0.356568	0.293003	1.21695	0.223625	0.48714	38.6565	0.476487	0.511259	0.931988	0.351343	0.967942	47.7092	0.0430102	0.986264	0.0436092	0.965216	0.998768	42.9625	0.315508	0.57219	0.551405	0.581356	0.875531
ENSSSCG00000000063	POLR3H	114.588	0.194416	0.15977	1.21685	0.223661	0.48714	142.868	0.130163	0.291161	0.447047	0.654841	0.995655	98.8707	0.454718	0.43815	1.03781	0.299356	0.903854	121.9	0.251999	0.295766	0.852022	0.394202	0.779151
ENSSSCG00000000064	ACO2	5087.34	0.036168	0.115847	0.312205	0.754885	0.882843	4831.13	-0.0648352	0.194943	-0.332585	0.739447	0.995655	4443.19	0.0970256	0.186974	0.518925	0.603813	0.967921	4645.27	0.0102351	0.13637	0.075054	0.940172	0.991758
ENSSSCG00000000066	L3MBTL2	868.214	-0.0428942	0.0921314	-0.465577	0.641519	0.816695	830.96	0.146755	0.164172	0.893911	0.37137	0.973186	791.361	-0.0663345	0.205751	-0.322403	0.747148	0.983832	811.928	0.0474816	0.116192	0.408649	0.682797	0.917213
ENSSSCG00000000067	CHADL	23.7564	0.30191	0.281344	1.0731	0.283227	0.548377	23.3768	-0.27465	0.758468	-0.362111	0.717269	0.995655	22.0002	1.08808	0.597475	1.82114	0.068586	0.676093	22.7174	0.319682	0.47503	0.672972	0.500965	0.838488
ENSSSCG00000000068	EP300	7820.68	0.0530028	0.109148	0.485605	0.627247	0.809863	5126.47	0.0758793	0.193821	0.391492	0.695434	0.995655	5972.41	0.284293	0.201836	1.40854	0.158972	0.810357	5528.03	0.184769	0.121359	1.5225	0.127884	0.527776
ENSSSCG00000000071	ST13	26118	0.104589	0.138967	0.752617	0.45168	0.689682	24640.5	-0.070323	0.23614	-0.297802	0.765854	0.995655	25726.8	0.619229	0.284035	2.18012	0.0292486	0.520663	25153	0.259737	0.198075	1.31131	0.189754	0.611504
ENSSSCG00000000072	SLC25A17	330.072	0.0667689	0.105822	0.630955	0.52807	0.746711	309.6	0.143015	0.256548	0.557461	0.577212	0.993215	348.975	0.127699	0.240827	0.53025	0.595939	0.966821	328.253	0.137082	0.138953	0.986536	0.32387	0.730928
ENSSSCG00000000075	MRTFA	2774.73	0.00218248	0.110433	0.019763	0.984232	0.990951	1895.45	-0.0464432	0.19901	-0.233371	0.815473	0.99681	1996.87	0.179454	0.218581	0.820995	0.411649	0.930669	1943.32	0.0609434	0.1261	0.483293	0.628888	0.897926
ENSSSCG00000000076	SGSM3	784.75	0.442132	0.253571	1.74363	0.0812243	0.272439	802.756	0.144669	0.200608	0.721156	0.470814	0.98867	873.603	-0.095684	0.347008	-0.27574	0.782748	0.987961	836.42	0.0114257	0.216126	0.0528656	0.957839	0.99439
ENSSSCG00000000077	ADSL	1463.51	-0.19696	0.0623693	-3.15797	0.00158872	0.0210706	1226.86	-0.198852	0.189068	-1.05175	0.292915	0.960911	1515.04	-0.150529	0.186032	-0.809156	0.418426	0.932385	1363.63	-0.172262	0.109142	-1.57833	0.11449	0.507927
ENSSSCG00000000078	TNRC6B	12772	-0.339635	0.136749	-2.48364	0.0130047	0.088533	9815.13	-0.453971	0.21258	-2.13553	0.032718	0.510664	10497.3	0.083905	0.224126	0.374365	0.708132	0.981374	10137.7	-0.186284	0.154221	-1.2079	0.227086	0.647075
ENSSSCG00000000079	FAM83F	32.2478	-0.316268	0.397363	-0.795917	0.42608	0.67195	20.1728	0.224049	0.671892	0.333461	0.738787	0.995655	34.2273	-1.06538	0.63512	-1.67745	0.0934547	0.718625	26.8397	-0.534744	0.442856	-1.20749	0.227244	0.647075
ENSSSCG00000000080	GRAP2	32.2803	-1.11763	0.401025	-2.78694	0.00532076	0.0483354	20.4698	0.061694	0.635959	0.0970094	0.922719	0.998795	27.9885	-1.51093	0.852786	-1.77176	0.0764341	0.688574	24.036	-0.734573	0.491844	-1.49351	0.135304	0.53899
ENSSSCG00000000082	CACNA1I	44.6024	0.0324575	0.238526	0.136076	0.891762	0.949185	35.5438	0.429933	0.500432	0.859123	0.390273	0.981685	54.3859	-0.28332	0.486935	-0.581843	0.560672	0.96456	44.506	0.0157113	0.343044	0.0457997	0.96347	0.994712
ENSSSCG00000000084	ATF4	26432.1	0.00871044	0.120394	0.0723492	0.942324	0.971274	24731.7	-0.039895	0.134564	-0.296477	0.766866	0.995655	24661	0.331177	0.287326	1.15262	0.249068	0.880565	24692.4	0.134688	0.157108	0.857296	0.391281	0.777184
ENSSSCG00000000087	TAB1	459.549	0.300807	0.110842	2.71382	0.00665118	0.0557193	503.717	0.153463	0.195039	0.786832	0.43138	0.983944	417.413	0.479238	0.215015	2.22886	0.0258231	0.501228	462.563	0.290648	0.173886	1.67148	0.0946268	0.478178
ENSSSCG00000000091	APOBEC3B	789.879	0.161082	0.114782	1.40338	0.160505	0.40465	722.111	0.284339	0.189345	1.5017	0.133175	0.827519	712.037	0.0628913	0.264026	0.238201	0.811725	0.988618	717.174	0.182302	0.145766	1.25065	0.211063	0.633639
ENSSSCG00000000093	DNAL4	53.5817	0.295318	0.211491	1.39636	0.162605	0.40778	29.7305	-0.254067	0.547563	-0.463996	0.64265	0.995655	46.8044	0.866691	0.443647	1.95356	0.0507531	0.617309	37.8488	0.38334	0.33014	1.16114	0.245584	0.66413
ENSSSCG00000000094	SUN2	6642.61	0.10641	0.0856252	1.24274	0.213964	0.475491	5519.7	0.0744871	0.176578	0.421838	0.673143	0.995655	5711.17	0.179433	0.223835	0.801632	0.422766	0.936471	5609.51	0.12691	0.115017	1.1034	0.269852	0.686635
ENSSSCG00000000095	GTPBP1	3239.7	0.0179981	0.112294	0.160277	0.872663	0.941403	2737.27	0.0322872	0.177435	0.181966	0.855609	0.998795	2734	0.0740291	0.199415	0.371232	0.710465	0.981374	2734.96	0.0522762	0.107574	0.485957	0.626998	0.897699
ENSSSCG00000000097		3088.01	-0.0901624	0.0911216	-0.989473	0.322432	0.586517	3157.09	-0.167747	0.183577	-0.91377	0.360838	0.967942	3498.25	-0.0433964	0.240298	-0.180594	0.856686	0.99083	3318.45	-0.104866	0.12168	-0.861813	0.388791	0.775511
ENSSSCG00000000104	DDX17	16920.6	0.0667601	0.0915152	0.729498	0.465697	0.702052	14952.5	0.0376969	0.164798	0.228746	0.819067	0.99681	17699.6	-0.0696672	0.189231	-0.368159	0.712755	0.982129	16256.3	-0.0162178	0.0998721	-0.162386	0.871002	0.975951
ENSSSCG00000000107		2186.2	-0.105911	0.0938979	-1.12793	0.259348	0.524391	1833.2	-0.241139	0.260813	-0.924566	0.355191	0.967942	1902.89	-0.0204756	0.261236	-0.0783796	0.937526	0.99836	1865.77	-0.133048	0.176045	-0.755766	0.44979	0.80985
ENSSSCG00000000108	TMEM184B	485.532	-0.176711	0.139007	-1.27124	0.203643	0.461803	351.005	0.0194668	0.24034	0.0809972	0.935444	0.998795	316.128	-0.11866	0.261503	-0.453762	0.65	0.977132	334.322	-0.0504251	0.157603	-0.31995	0.749007	0.941287
ENSSSCG00000000110	PLA2G6	183.631	-0.0290104	0.130232	-0.222759	0.823723	0.916808	173.198	0.0479692	0.253839	0.188975	0.850112	0.998795	171.37	0.0726652	0.283766	0.256075	0.797893	0.988618	172.284	0.0618584	0.144116	0.429225	0.667759	0.910861
ENSSSCG00000000114	PICK1	256.814	-0.0722437	0.118097	-0.611733	0.540714	0.754891	260.164	-0.148775	0.203494	-0.731102	0.464717	0.98867	239.795	-0.200514	0.305392	-0.656579	0.511451	0.958922	250.404	-0.168971	0.155499	-1.08663	0.277198	0.691263
ENSSSCG00000000116	POLR2F	461.09	0.39153	0.155661	2.51528	0.0118939	0.0831824	535.656	0.496961	0.303382	1.63807	0.101407	0.771969	445.562	0.468917	0.347043	1.35118	0.176639	0.823279	492.603	0.475014	0.239549	1.98295	0.0473734	0.348948
ENSSSCG00000000118	MICALL1	890.087	0.330313	0.104982	3.14639	0.00165301	0.0215799	627.118	0.317283	0.175052	1.81251	0.0699082	0.681403	650.451	0.127507	0.218862	0.58259	0.560169	0.96456	638.074	0.221389	0.112183	1.97346	0.0484433	0.351383
ENSSSCG00000000119	EIF3L	5693.09	0.156353	0.113133	1.38203	0.166963	0.413172	5288.82	0.0573392	0.211327	0.271329	0.786138	0.995655	5115.18	0.100252	0.176235	0.568854	0.569455	0.96598	5205.01	0.0749394	0.129771	0.577473	0.56362	0.86873
ENSSSCG00000000120	ANKRD54	173.729	-0.0452931	0.129667	-0.349302	0.726863	0.86783	186.618	-0.0285511	0.2529	-0.112895	0.910114	0.998795	170.145	0.101675	0.257698	0.394551	0.693174	0.979182	178.723	0.0330255	0.155426	0.212484	0.83173	0.966267
ENSSSCG00000000130	CYTH4	1603.55	-0.100362	0.263502	-0.380879	0.703293	0.853312	1339.41	-0.395314	0.331664	-1.19191	0.233296	0.929272	1457.16	0.517118	0.442005	1.16994	0.242027	0.87626	1394.94	0.0317257	0.306859	0.103389	0.917654	0.987026
ENSSSCG00000000133	TST	82.6997	-0.118576	0.192549	-0.615821	0.538012	0.752777	78.7232	-0.210521	0.398194	-0.528689	0.597021	0.994088	107.322	0.199686	0.513074	0.389195	0.697132	0.979188	92.3253	0.00990356	0.306596	0.0323017	0.974231	0.995128
ENSSSCG00000000135	KCTD17	12.175	0.209799	0.369336	0.568044	0.570005	0.772853	11.3153	1.10629	0.825331	1.34043	0.180107	0.892289	8.72086	-0.660179	0.826297	-0.798962	0.424313	0.937576	10.0763	0.377305	0.512621	0.73603	0.461712	0.817459
ENSSSCG00000000136	CSF2RB	4939.8	0.493152	0.155836	3.16456	0.00155317	0.0207027	3105.38	0.381454	0.245413	1.55433	0.120105	0.806879	3868.06	0.479456	0.270567	1.77204	0.0763873	0.688574	3467.71	0.434505	0.175763	2.47211	0.0134317	0.183032
ENSSSCG00000000137	NCF4	1764.54	0.237074	0.0922041	2.57119	0.0101351	0.0739907	1771.32	0.158118	0.206958	0.764012	0.44486	0.986921	1865.74	0.355907	0.264478	1.3457	0.1784	0.826308	1815.96	0.255924	0.17036	1.50225	0.133031	0.535503
ENSSSCG00000000139	IFT27	174.341	0.549191	0.279242	1.96672	0.0492154	0.203607	193.741	0.163366	0.258572	0.631801	0.527517	0.993041	182.625	0.0993976	0.463365	0.214512	0.830148	0.989698	188.438	0.123863	0.294124	0.421125	0.673664	0.91371
ENSSSCG00000000141	EIF3D	12338.9	0.16914	0.106708	1.58507	0.11295	0.330704	13609.9	0.130228	0.236292	0.551134	0.581542	0.993215	11545	0.223977	0.189032	1.18486	0.236073	0.875585	12625.2	0.167641	0.181757	0.922335	0.356354	0.752638
ENSSSCG00000000142	FOXRED2	107.535	0.0685039	0.235799	0.290518	0.77142	0.889678	74.4423	-0.535496	0.440582	-1.21543	0.224202	0.924714	88.2906	0.693909	0.463772	1.49623	0.134594	0.781276	81.0076	0.0399108	0.316819	0.125973	0.899753	0.982496
ENSSSCG00000000144	TXN2	573.185	0.104031	0.0902341	1.1529	0.248951	0.51436	479.119	0.173496	0.202876	0.855184	0.392449	0.98258	524.949	0.183223	0.197945	0.925626	0.35464	0.920068	500.828	0.176566	0.0964645	1.83037	0.0671941	0.409392
ENSSSCG00000000145		12732.6	0.0706121	0.178084	0.39651	0.691729	0.84676	8488.03	-0.0493482	0.216472	-0.227966	0.819673	0.99681	10712.8	-0.286302	0.303047	-0.944744	0.34479	0.917844	9544.95	-0.174687	0.177587	-0.983669	0.325278	0.732076
ENSSSCG00000000146	MYH11	20.7973	0.190084	0.321184	0.591821	0.553971	0.764147	20.3322	-0.284237	0.738383	-0.384945	0.700278	0.995655	27.6206	0.295089	0.607868	0.48545	0.627357	0.973996	23.7929	0.0439007	0.414304	0.105963	0.915612	0.986866
ENSSSCG00000000148		1011.55	-0.117481	0.121462	-0.967227	0.33343	0.595185	1003.27	0.134532	0.195441	0.688353	0.49123	0.989825	1112.14	-0.251694	0.310001	-0.811913	0.416842	0.932385	1054.68	-0.0762017	0.177966	-0.428181	0.668519	0.910892
ENSSSCG00000000156	FBXO7	6139.67	0.165788	0.165861	0.999557	0.317525	0.581549	6277.5	0.210915	0.2018	1.04517	0.295947	0.960992	7415.18	0.610581	0.344846	1.77059	0.0766287	0.688574	6817.64	0.424997	0.207026	2.05286	0.0400859	0.32272
ENSSSCG00000000158	RTCB	743.918	0.109474	0.122539	0.893379	0.371654	0.628517	726.476	0.341263	0.17226	1.98109	0.0475812	0.588122	750.816	-0.264415	0.218091	-1.21241	0.225356	0.868682	737.829	0.0482867	0.139023	0.347327	0.728345	0.934185
ENSSSCG00000000160	PRDM4	660.261	-0.0519549	0.100463	-0.517153	0.60505	0.79662	569.906	0.0140485	0.175797	0.0799134	0.936306	0.998795	588.517	0.0328725	0.255165	0.128828	0.897494	0.992395	578.644	0.0193115	0.119444	0.161678	0.871559	0.975987
ENSSSCG00000000161	PWP1	322.677	-0.197698	0.0859349	-2.30056	0.0214165	0.122186	256.364	-0.0941363	0.214775	-0.438301	0.661168	0.995655	282.574	-0.328366	0.274438	-1.1965	0.231501	0.873496	268.759	-0.208177	0.129286	-1.6102	0.107353	0.497353
ENSSSCG00000000162	BTBD11	1764.26	0.0729642	0.104467	0.698439	0.484902	0.71577	1347.45	0.104678	0.295986	0.353659	0.723594	0.995655	1771.59	0.221824	0.257129	0.862696	0.388304	0.923864	1549	0.164228	0.201891	0.813446	0.415962	0.79068
ENSSSCG00000000164	CRY1	807.677	-0.279677	0.085513	-3.27058	0.00107329	0.0159507	688.523	-0.339471	0.223815	-1.51675	0.12933	0.821017	770.431	-0.258224	0.298322	-0.865589	0.386716	0.923864	727.25	-0.295708	0.159254	-1.85683	0.0633357	0.400621
ENSSSCG00000000167	RIC8B	1431.51	-0.602275	0.186621	-3.22726	0.00124983	0.0178188	1102.46	-0.855069	0.300046	-2.8498	0.00437471	0.182145	1326.91	-0.293797	0.324836	-0.904449	0.365757	0.920068	1208.87	-0.564403	0.24683	-2.28661	0.0222186	0.240514
ENSSSCG00000000169	POLR3B	109.551	-0.089496	0.131162	-0.682333	0.495028	0.722389	93.3772	0.00752901	0.338982	0.0222106	0.98228	0.998917	99.4482	-0.230278	0.332957	-0.691615	0.489179	0.953989	96.2336	-0.111729	0.182444	-0.6124	0.540273	0.856788
ENSSSCG00000000171	CKAP4	123.325	0.575408	0.162518	3.54059	0.000399238	0.0079704	93.2586	0.772842	0.56134	1.37678	0.16858	0.876907	150.22	0.50505	0.381743	1.32301	0.185832	0.828848	120.332	0.611571	0.362601	1.68662	0.0916759	0.470961
ENSSSCG00000000175	ADCY6	743.591	0.30215	0.422236	0.715596	0.474241	0.70892	631.647	0.017527	0.213682	0.0820237	0.934628	0.998795	828.611	-0.396519	0.374908	-1.05764	0.290218	0.900008	725.293	-0.209823	0.216921	-0.967276	0.333406	0.737508
ENSSSCG00000000176	DDX23	981.087	-0.0770433	0.117545	-0.655436	0.512187	0.735896	833.388	0.15839	0.200145	0.791375	0.428725	0.983944	980.586	-0.36096	0.37296	-0.967824	0.333132	0.914521	903.06	-0.107862	0.210212	-0.513111	0.607874	0.888732
ENSSSCG00000000182	WNT10B	18.012	-0.659665	0.369415	-1.7857	0.0741477	0.257929	14.5673	-0.623118	0.900284	-0.692135	0.488852	0.988843	20.3921	-0.731415	0.719209	-1.01697	0.309167	0.907225	17.3399	-0.676546	0.481496	-1.40509	0.159994	0.576379
ENSSSCG00000000185	PRKAG1	395.918	-0.00835741	0.104312	-0.0801193	0.936142	0.968764	364.614	-0.0452308	0.212355	-0.212996	0.83133	0.997841	408.27	0.0527213	0.210981	0.249887	0.802675	0.988618	385.29	0.00249457	0.105617	0.0236189	0.981157	0.996079
ENSSSCG00000000186	RHEBL1	12.6816	-0.159036	0.403183	-0.394453	0.693247	0.847528	14.1959	1.12745	0.773885	1.45687	0.145152	0.845831	9.98146	-0.985217	0.793654	-1.24137	0.21447	0.856482	12.1865	0.184433	0.530935	0.347374	0.72831	0.934185
ENSSSCG00000000189	LMBR1L	1392.37	-0.0490626	0.0766101	-0.64042	0.5219	0.742084	1252.27	-0.106466	0.192584	-0.552831	0.580379	0.993215	1352.79	0.039534	0.215763	0.183228	0.854619	0.99083	1299.8	-0.0293269	0.114248	-0.256694	0.797415	0.955398
ENSSSCG00000000190	TUBA1B	24719.5	-0.0527899	0.17552	-0.300764	0.763595	0.886456	26905.5	-0.129823	0.186904	-0.694598	0.487307	0.988754	31048.5	-0.560032	0.213096	-2.62808	0.00858688	0.327223	28867.7	-0.356423	0.157993	-2.25594	0.0240747	0.252556
ENSSSCG00000000194		1333.43	-0.101012	0.165766	-0.609368	0.542281	0.756045	1630.27	0.00975702	1.31742	0.00740614	0.994091	0.999052	1804.99	-0.786498	1.2644	-0.622034	0.53392	0.962346	1713.36	-0.324743	0.824416	-0.393906	0.69365	0.922653
ENSSSCG00000000198	DNAJC22	68.563	0.588607	0.277276	2.12282	0.0337692	0.160712	64.493	0.0871146	0.543437	0.160303	0.872642	0.998795	87.1302	1.28948	0.5936	2.17231	0.0298323	0.524762	75.2509	0.787906	0.426797	1.84609	0.0648793	0.404372
ENSSSCG00000000199	SPATS2	716.859	-0.0771238	0.10779	-0.715501	0.474299	0.70892	597.007	-0.0492054	0.176706	-0.27846	0.78066	0.995655	751.075	-0.310927	0.229353	-1.35567	0.175204	0.821911	670.166	-0.192192	0.131563	-1.46083	0.144062	0.551856
ENSSSCG00000000202	MCRS1	1788.88	-0.0738377	0.0776204	-0.951267	0.341469	0.602628	1685.32	-0.0586177	0.177109	-0.33097	0.740667	0.995655	1907.57	0.00199032	0.198623	0.0100206	0.992005	0.998817	1790.63	-0.0219638	0.105235	-0.208711	0.834674	0.967607
ENSSSCG00000000204	PRPF40B	56.5095	-0.468092	0.294365	-1.59018	0.111795	0.328511	48.4921	0.162556	0.633156	0.256739	0.79738	0.995655	60.6213	-0.288573	0.779324	-0.370286	0.71117	0.981404	54.2588	-0.0778339	0.491389	-0.158396	0.874145	0.976612
ENSSSCG00000000207		366127	0.203402	0.130154	1.56277	0.118106	0.339749	312743	0.0864889	0.190699	0.453535	0.650163	0.995655	369340	0.629647	0.405967	1.55098	0.120907	0.763951	339631	0.365863	0.228496	1.60118	0.109338	0.500533
ENSSSCG00000000209	NCKAP5L	393.227	-0.0995746	0.119829	-0.830972	0.40599	0.656246	257.471	-0.146663	0.263654	-0.556271	0.578026	0.993215	284.267	0.00252462	0.323764	0.00779771	0.993778	0.999327	270.149	-0.0723286	0.173158	-0.417704	0.676163	0.914294
ENSSSCG00000000214	GPD1	192.962	-0.217084	0.1333	-1.62853	0.103412	0.31339	187.563	-0.106613	0.255913	-0.416598	0.676972	0.995655	187.348	0.00927468	0.261243	0.0355021	0.971679	0.998768	187.405	-0.0496726	0.138724	-0.358066	0.720294	0.931536
ENSSSCG00000000215	SMARCD1	1026.34	-0.337666	0.124943	-2.70256	0.00688073	0.0568605	663.259	-0.325811	0.249804	-1.30427	0.192143	0.901207	745.978	-0.432411	0.393171	-1.0998	0.271417	0.898955	702.413	-0.380991	0.21954	-1.73541	0.0826685	0.445293
ENSSSCG00000000217	RACGAP1	567.165	-0.061673	0.110286	-0.559212	0.576017	0.778341	518.112	0.130295	0.17281	0.753978	0.450862	0.988598	545.756	-0.248991	0.295196	-0.843476	0.398962	0.928571	531.062	-0.0579984	0.164632	-0.352291	0.72462	0.933169
ENSSSCG00000000220	POU6F1	80.4753	0.279625	0.214196	1.30546	0.191735	0.447057	57.2932	0.836422	0.584783	1.43031	0.152627	0.854058	40.4005	0.0349408	0.734096	0.047597	0.962037	0.998521	49.2351	0.496505	0.474502	1.04637	0.295389	0.706471
ENSSSCG00000000223	BIN2	2006.33	0.262908	0.117135	2.24449	0.0248007	0.132363	1688.37	0.327014	0.165557	1.97523	0.0482421	0.590704	1755.24	0.0667806	0.262015	0.254873	0.798821	0.988618	1719.9	0.206976	0.179058	1.15591	0.247716	0.665166
ENSSSCG00000000228	SCN8A	18.6064	-0.736229	0.339654	-2.16758	0.0301905	0.14956	15.656	-0.422482	0.896978	-0.471006	0.637636	0.995655	13.2992	-1.57407	0.758149	-2.0762	0.0378756	0.559205	14.5288	-0.999333	0.563711	-1.77278	0.0762659	0.433503
ENSSSCG00000000232	ACVRL1	342.375	-0.0943186	0.199893	-0.471846	0.637037	0.814434	374.649	0.292172	0.376539	0.775942	0.437783	0.983944	302.469	-0.475511	0.524796	-0.906087	0.36489	0.920068	340.256	0.0575511	0.363976	0.158118	0.874364	0.976612
ENSSSCG00000000233	ACVR1B	51.4557	0.555268	0.249874	2.22219	0.0262706	0.137184	41.581	-0.355606	0.459025	-0.774699	0.438518	0.983944	49.1851	1.03036	0.589548	1.74772	0.080513	0.697202	45.1924	0.320169	0.365554	0.875844	0.381115	0.770635
ENSSSCG00000000234	GRASP	84.1284	-0.265903	0.201829	-1.31746	0.187683	0.442569	69.4246	-0.75321	0.607565	-1.23972	0.215079	0.91771	97.3582	0.222377	0.412003	0.539745	0.589373	0.966821	82.684	-0.21625	0.387029	-0.558745	0.576336	0.873942
ENSSSCG00000000240	KRT85	42.3803	0.3505	0.281796	1.24381	0.213571	0.474882	52.0335	-0.238974	0.471934	-0.506372	0.612595	0.994186	46.6542	0.212184	0.579014	0.366457	0.714024	0.982631	49.4644	0.0029678	0.401266	0.00739609	0.994099	0.998928
ENSSSCG00000000257	ITGB7	10591.4	0.164792	0.114284	1.44195	0.149316	0.388871	10329.5	0.207553	0.140635	1.47583	0.13999	0.839946	10592.6	0.0950401	0.295056	0.322108	0.747371	0.983832	10453.5	0.154598	0.158317	0.976508	0.328813	0.734121
ENSSSCG00000000258	RARG	298.398	0.13635	0.145538	0.936869	0.348826	0.608617	254.959	0.408212	0.254018	1.60702	0.108049	0.784913	229.027	0.1593	0.371631	0.428651	0.668177	0.978874	242.569	0.287577	0.230017	1.25024	0.21121	0.633639
ENSSSCG00000000259	CSAD	133.535	-0.0869683	0.153872	-0.5652	0.571938	0.774763	107.791	-0.141623	0.402487	-0.351869	0.724936	0.995655	128.291	-0.288818	0.36025	-0.801716	0.422717	0.936471	117.506	-0.214477	0.235631	-0.910226	0.362704	0.757384
ENSSSCG00000000262	SPRYD3	739.868	0.0233226	0.0796602	0.292777	0.769693	0.889272	647.794	0.0135307	0.17979	0.0752588	0.940009	0.998795	794.444	0.0525451	0.211374	0.248588	0.803679	0.988618	717.413	0.0344488	0.110741	0.311076	0.755743	0.944293
ENSSSCG00000000264	MFSD5	385.577	-0.216774	0.119291	-1.81719	0.0691876	0.247754	328.632	-0.0308909	0.211959	-0.14574	0.884127	0.998795	358.729	-0.367308	0.280891	-1.30765	0.190992	0.836247	342.828	-0.194385	0.143423	-1.35533	0.175313	0.596032
ENSSSCG00000000265	ESPL1	387.545	-0.189864	0.149241	-1.27219	0.203305	0.461324	377.829	-0.0169807	0.280974	-0.0604352	0.951809	0.998795	377.039	-0.351981	0.316823	-1.11097	0.266581	0.894734	377.272	-0.166334	0.205533	-0.80928	0.418354	0.792579
ENSSSCG00000000267	C12orf10	494.543	0.146286	0.0930763	1.57168	0.116025	0.336306	560.728	-0.0633964	0.181598	-0.349103	0.727012	0.995655	512.719	0.246434	0.216971	1.13579	0.256044	0.886555	537.768	0.0743945	0.155037	0.479851	0.631334	0.899422
ENSSSCG00000000268	AAAS	376.955	0.0394196	0.130194	0.302776	0.762061	0.885652	368.323	0.268233	0.203654	1.3171	0.187805	0.901207	392.794	-0.361153	0.254691	-1.41801	0.156189	0.809912	379.831	-0.0418242	0.176236	-0.237319	0.81241	0.959148
ENSSSCG00000000271	AMHR2	136.898	-0.301912	0.175611	-1.71921	0.0855766	0.280882	83.7057	0.239536	0.519119	0.461428	0.644491	0.995655	107.301	-0.473566	0.386996	-1.2237	0.221066	0.864417	94.914	-0.15329	0.337115	-0.454712	0.649317	0.904735
ENSSSCG00000000272	SP1	3282.46	0.0723984	0.0990321	0.73106	0.464743	0.701248	2692.24	0.0527902	0.180806	0.291971	0.770309	0.995655	2976.68	-0.0403537	0.322348	-0.125187	0.900376	0.992731	2826.86	0.00801819	0.165111	0.0485624	0.961268	0.99439
ENSSSCG00000000273	PRR13	1407.76	0.0744719	0.0766319	0.971813	0.331144	0.593394	1014.3	-0.0554808	0.17444	-0.31805	0.750447	0.995655	1088.86	0.135045	0.191106	0.706652	0.479783	0.951783	1049.5	0.0438799	0.0899116	0.488033	0.625526	0.897246
ENSSSCG00000000274	PCBP2	25706.3	-0.0490991	0.183685	-0.2673	0.789238	0.898324	14016.7	-0.142283	0.323045	-0.440444	0.659616	0.995655	15477.2	0.085954	0.295077	0.291294	0.770827	0.986962	14708.4	-0.020449	0.222472	-0.0919174	0.926764	0.989063
ENSSSCG00000000275	MAP3K12	322.548	0.188506	0.217665	0.86604	0.386468	0.641033	319.011	0.276992	0.262449	1.05541	0.291237	0.960579	307.463	-0.0313671	0.45037	-0.0696474	0.944474	0.998416	313.476	0.12467	0.250282	0.498118	0.618401	0.893747
ENSSSCG00000000276	TARBP2	454.652	0.0574412	0.108101	0.531364	0.595167	0.790232	442.902	0.0630905	0.22753	0.277284	0.781562	0.995655	507.314	-0.0135685	0.210421	-0.0644825	0.948586	0.998416	473.429	0.0315989	0.126953	0.248903	0.803436	0.957029
ENSSSCG00000000277	NPFF	38.6158	-0.758557	0.226521	-3.34873	0.000811831	0.0131353	34.3378	-0.557553	0.60364	-0.923652	0.355668	0.967942	38.469	-0.639509	0.445763	-1.43464	0.15139	0.807312	36.292	-0.625767	0.317208	-1.97273	0.0485261	0.351795
ENSSSCG00000000278		921.457	-0.0386265	0.1479	-0.261165	0.793965	0.900088	554.114	0.0241856	0.288552	0.083817	0.933202	0.998795	662.532	-0.0819445	0.363676	-0.225323	0.821728	0.989273	605.568	-0.0324357	0.2149	-0.150934	0.880028	0.977913
ENSSSCG00000000288	HNRNPA1	10617.8	-0.125015	0.0629642	-1.98549	0.0470903	0.198059	9520.9	-0.135417	0.144712	-0.935767	0.349393	0.967942	10590.3	-0.118933	0.241321	-0.49284	0.622126	0.972139	10026.5	-0.126849	0.107266	-1.18256	0.236982	0.656156
ENSSSCG00000000289	NFE2	7278.12	0.181855	0.145019	1.254	0.209841	0.470331	8984.82	0.301576	0.331863	0.908736	0.36349	0.967942	6751.28	0.438218	0.501992	0.872959	0.382686	0.9223	7920.21	0.35133	0.335104	1.04842	0.294444	0.706195
ENSSSCG00000000290	COPZ1	1753.39	0.0648127	0.0721493	0.898313	0.369019	0.626221	1667.31	0.109	0.174196	0.625735	0.531489	0.993041	1740.34	-0.0322676	0.177186	-0.182112	0.855495	0.99083	1701.63	0.0401024	0.0891497	0.449832	0.652832	0.905313
ENSSSCG00000000291		6150.98	1.55113	0.418802	3.70375	0.000212439	0.00495671	4363.36	1.66263	0.341986	4.8617	1.16382e-06	0.000487028	5406.72	1.97456	0.44897	4.39798	1.09263e-05	0.00775768	4859.15	1.82094	0.296368	6.14417	8.03809e-10	9.84812e-07
ENSSSCG00000000292	ZNF385A	106.799	-0.0419611	0.194021	-0.216271	0.828776	0.919301	52.5787	-0.151902	0.608243	-0.249739	0.802789	0.995655	87.7296	0.104123	0.398604	0.261219	0.793923	0.988618	69.2912	-0.00271736	0.349018	-0.00778573	0.993788	0.998843
ENSSSCG00000000293	ITGA5	7658.06	0.183847	0.159669	1.15143	0.249556	0.514941	5419.25	-0.108895	0.315309	-0.34536	0.729824	0.995655	7135.55	0.519643	0.251301	2.06781	0.0386578	0.566225	6234.69	0.232203	0.226785	1.02389	0.305887	0.716837
ENSSSCG00000000295	NCKAP1L	12216.1	-0.0185495	0.0522197	-0.35522	0.722424	0.865479	10986.9	-0.00776337	0.15711	-0.0494136	0.96059	0.998818	12403.8	-0.0269383	0.170879	-0.157646	0.874736	0.99083	11658.3	-0.0172511	0.0740438	-0.232985	0.815773	0.960707
ENSSSCG00000000297	PDE1B	578.869	-0.5831	0.0974356	-5.98446	2.17104e-09	6.72315e-07	500.628	-0.455415	0.25774	-1.76696	0.0772349	0.70118	618.811	-0.532993	0.2503	-2.12942	0.0332197	0.54007	556.74	-0.493667	0.163238	-3.02421	0.00249285	0.0685692
ENSSSCG00000000299	TESPA1	605.549	-0.370693	0.157097	-2.35964	0.0182928	0.109625	453.443	-0.114106	0.257409	-0.443287	0.657558	0.995655	694.031	-0.760148	0.447555	-1.69844	0.0894239	0.713228	567.633	-0.484001	0.283778	-1.70556	0.0880892	0.461527
ENSSSCG00000000359		279.694	0.234631	0.0897038	2.61562	0.00890649	0.0680039	315.229	0.299479	0.206815	1.44805	0.147602	0.846799	271.695	0.169296	0.241274	0.701674	0.482883	0.952351	294.435	0.234477	0.15627	1.50046	0.133495	0.536171
ENSSSCG00000000361	CD63	4093.8	0.363642	0.163756	2.22064	0.0263753	0.137308	3631.39	0.0467111	0.169951	0.27485	0.783432	0.995655	4615.61	0.13568	0.299548	0.45295	0.650585	0.977132	4098.89	0.0926613	0.161273	0.57456	0.565589	0.869369
ENSSSCG00000000363	GDF11	40.1256	-0.264708	0.282444	-0.937207	0.348652	0.608473	27.1629	0.107873	0.686053	0.157237	0.875058	0.998795	34.6429	-0.459071	0.656502	-0.699268	0.484385	0.952351	30.7073	-0.154764	0.429563	-0.360282	0.718636	0.931345
ENSSSCG00000000364	SARNP	320.135	-0.241549	0.136182	-1.77372	0.0761101	0.26191	262.924	0.0277484	0.278595	0.0996013	0.920661	0.998795	285.383	-0.416331	0.294433	-1.41401	0.157359	0.809912	273.507	-0.192665	0.180578	-1.06694	0.286	0.699888
ENSSSCG00000000365	ORMDL2	742.213	0.232016	0.0674116	3.44179	0.000577884	0.0103421	656.213	0.280311	0.165369	1.69506	0.0900635	0.735128	814.45	0.156498	0.24045	0.650852	0.515142	0.958922	731.372	0.214454	0.121627	1.76322	0.077864	0.435703
ENSSSCG00000000366	DNAJC14	2049.66	-0.0284105	0.0855148	-0.332229	0.739716	0.874329	1933.91	-0.0739251	0.180519	-0.409514	0.682162	0.995655	2197.85	-0.111456	0.23236	-0.47967	0.631462	0.974982	2058.81	-0.0941735	0.120637	-0.780633	0.435018	0.803164
ENSSSCG00000000367		108.196	0.0148882	0.16606	0.0896557	0.928561	0.965715	100.929	0.385746	0.351296	1.09807	0.272176	0.952738	104.626	-0.0780873	0.401379	-0.194548	0.845747	0.99083	102.659	0.152599	0.232113	0.657437	0.5109	0.843973
ENSSSCG00000000368	MMP19	65.1413	0.814014	0.358631	2.26978	0.0232208	0.127866	54.5425	0.323716	0.407869	0.793678	0.427383	0.983944	81.4194	0.0960186	0.568061	0.169029	0.865774	0.99083	67.3278	0.0926089	0.374015	0.247607	0.804438	0.957029
ENSSSCG00000000370	DGKA	1714.42	0.0641527	0.142663	0.449679	0.652942	0.823638	1299.82	0.198843	0.202266	0.983072	0.325572	0.967458	1432.28	-0.153572	0.375337	-0.409158	0.682423	0.979182	1362.51	0.0223522	0.201878	0.110722	0.911837	0.985809
ENSSSCG00000000371	PMEL	165.179	0.946967	0.496288	1.9081	0.0563784	0.219321	169.8	0.513953	0.279512	1.83875	0.0659515	0.667148	118.294	-0.0287015	0.655194	-0.0438062	0.965059	0.998768	145.28	0.298099	0.386097	0.772083	0.440065	0.804934
ENSSSCG00000000376	SUOX	876.923	-0.03949	0.116642	-0.338558	0.734942	0.872494	809.68	0.0528656	0.213333	0.247808	0.804283	0.995655	919.687	-0.290763	0.299979	-0.969279	0.332406	0.914521	861.69	-0.118581	0.189684	-0.625152	0.531871	0.852018
ENSSSCG00000000377	PA2G4	2905.46	0.0213676	0.0981472	0.21771	0.827655	0.918844	2755.25	0.133477	0.18739	0.712296	0.476281	0.98867	3016.64	-0.21529	0.24717	-0.871021	0.383743	0.922432	2878.61	-0.0380037	0.13957	-0.272291	0.785398	0.950921
ENSSSCG00000000379	ESYT1	6774.81	0.0723191	0.0992566	0.728607	0.466242	0.702396	5836.34	0.0561538	0.145605	0.385659	0.699749	0.995655	6240.03	-0.0337688	0.244075	-0.138354	0.889961	0.991578	6027.18	0.0124585	0.11121	0.112027	0.910802	0.985697
ENSSSCG00000000382	SMARCC2	3398.54	-0.174413	0.0832154	-2.09592	0.0360894	0.167562	2445.69	-0.194519	0.18386	-1.05797	0.290069	0.960579	2726.51	-0.146512	0.3224	-0.454441	0.649512	0.977132	2578.62	-0.169043	0.163837	-1.03177	0.302178	0.713046
ENSSSCG00000000383	RNF41	559.986	0.23192	0.0929907	2.49401	0.0126309	0.0871309	528.824	0.204101	0.190233	1.0729	0.283317	0.956837	563.042	0.139803	0.234957	0.595013	0.551835	0.96456	544.966	0.175325	0.109029	1.60806	0.107822	0.498635
ENSSSCG00000000384	NABP2	323.165	0.0525267	0.122467	0.428904	0.667993	0.833099	322.05	0.105192	0.240773	0.436892	0.662189	0.995655	341.521	-0.190658	0.237599	-0.802434	0.422302	0.936471	331.225	-0.0387749	0.137038	-0.282951	0.777215	0.948666
ENSSSCG00000000385	SLC39A5	13.1627	-0.882498	0.476983	-1.85017	0.0642896	0.236617	12.2667	-2.08217	0.819759	-2.53997	0.0110861	0.306458	13.9396	-0.627227	1.06592	-0.588437	0.556239	0.96456	13.0568	-1.13842	0.629625	-1.80809	0.0705932	0.417961
ENSSSCG00000000386	ANKRD52	865.399	-0.0873334	0.116194	-0.751617	0.452282	0.690267	601.145	0.193037	0.192488	1.00285	0.315932	0.962516	623.371	-0.144917	0.319629	-0.453392	0.650266	0.977132	611.571	0.0308828	0.162106	0.19051	0.848909	0.970916
ENSSSCG00000000393	PAN2	2662.74	-0.100539	0.0648548	-1.55021	0.12109	0.344392	2363.8	-0.0332128	0.15115	-0.219734	0.826078	0.99681	2697.37	-0.0454154	0.208044	-0.218297	0.827197	0.989698	2521.85	-0.0362727	0.0954099	-0.380178	0.703814	0.925485
ENSSSCG00000000394		371.372	0.21383	0.104395	2.04828	0.0405322	0.18039	384.752	0.150849	0.187183	0.805888	0.420307	0.983944	423.845	0.0819417	0.24889	0.329228	0.741983	0.983405	403.248	0.118494	0.111107	1.06648	0.286205	0.699888
ENSSSCG00000000396	STAT2	2870.5	0.651146	0.106722	6.10132	1.05193e-09	3.68619e-07	3017.49	0.89775	0.237979	3.77239	0.000161694	0.017631	2709.11	0.666355	0.288837	2.30702	0.0210534	0.463941	2870.16	0.792787	0.187335	4.23192	2.3171e-05	0.00306152
ENSSSCG00000000398	APOF	9.98356	-0.32931	0.433785	-0.759155	0.44776	0.687436	6.8689	0.00771421	0.966856	0.00797865	0.993634	NA	17.0947	-0.41268	0.793398	-0.520142	0.602964	0.967871	11.7294	-0.161554	0.567617	-0.284617	0.775938	0.948666
ENSSSCG00000000399	TIMELESS	297.338	-0.410897	0.157858	-2.60295	0.00924264	0.0695339	259.744	-0.30934	0.251919	-1.22793	0.219472	0.922308	309.334	-0.890037	0.519453	-1.71341	0.0866369	0.710366	283.162	-0.615694	0.296999	-2.07305	0.0381673	0.314182
ENSSSCG00000000402	RBMS2	157.663	-0.470034	0.16662	-2.82099	0.00478753	0.0453458	123.193	-0.414793	0.362939	-1.14287	0.253092	0.943664	144.99	-0.758453	0.451478	-1.67993	0.09297	0.718625	133.505	-0.574431	0.268045	-2.14304	0.03211	0.287922
ENSSSCG00000000403	BAZ2A	5074.39	-0.0242263	0.119835	-0.202164	0.839788	0.925262	3267.03	0.191467	0.202659	0.944773	0.344775	0.967942	3626.91	0.0241512	0.269643	0.0895673	0.928631	0.997528	3437.51	0.105144	0.153632	0.684387	0.493731	0.835302
ENSSSCG00000000405		7423.69	0.091422	0.0826833	1.10569	0.268861	0.534272	7323.76	0.16433	0.15816	1.03901	0.298801	0.960992	7954.5	-0.0516815	0.187371	-0.275824	0.782683	0.987961	7621.78	0.0579047	0.0976851	0.592768	0.553336	0.863315
ENSSSCG00000000406	PTGES3	2245.82	-0.024995	0.0893015	-0.279895	0.779558	0.894108	1868.74	-0.112938	0.169094	-0.667903	0.504195	0.989825	1849.5	0.172213	0.246218	0.699431	0.484282	0.952351	1859.14	0.0218337	0.134702	0.162089	0.871235	0.975987
ENSSSCG00000000411	NAB2	173.769	0.32086	0.206198	1.55607	0.119691	0.342532	150.622	0.0272091	0.322851	0.0842776	0.932836	0.998795	161.57	0.692486	0.37299	1.85658	0.0633709	0.656081	155.794	0.340401	0.23361	1.45713	0.14508	0.553125
ENSSSCG00000000413	MYO1A	42.7379	0.0563785	0.23617	0.23872	0.811323	0.910772	51.4168	0.0772772	0.456184	0.169399	0.865483	0.998795	40.3355	0.530788	0.493729	1.07506	0.282348	0.899985	46.1318	0.247455	0.309263	0.800144	0.423627	0.796313
ENSSSCG00000000419	RDH16	40.4723	-0.554601	0.273637	-2.02678	0.0426852	0.186543	29.8016	-0.346196	0.599578	-0.5774	0.56367	0.993215	35.7273	-0.663947	0.559281	-1.18714	0.23517	0.875585	32.6087	-0.493801	0.334416	-1.47661	0.139781	0.54461
ENSSSCG00000000431	MBD6	563.312	-0.275595	0.144284	-1.91009	0.0561222	0.218964	292.745	0.0539391	0.237446	0.227164	0.820296	0.99681	384.267	-0.674161	0.47331	-1.42435	0.154344	0.809912	336.207	-0.305034	0.262536	-1.16188	0.245285	0.66413
ENSSSCG00000000433	B4GALNT1	184.858	0.148236	0.191805	0.77285	0.439611	0.681394	187.219	0.147937	0.347902	0.425228	0.670671	0.995655	203.644	0.135917	0.357998	0.379659	0.704199	0.981374	195.006	0.148962	0.235309	0.633047	0.526703	0.849184
ENSSSCG00000000436	PIP4K2C	39.0228	0.173654	0.206132	0.842438	0.399543	0.65202	38.1457	0.0628866	0.419912	0.149762	0.880953	0.998795	40.4229	-0.0216045	0.554549	-0.0389587	0.968923	0.998768	39.2133	0.0296657	0.277805	0.106786	0.914959	0.986813
ENSSSCG00000000437	ARHGAP9	1773.14	0.0133788	0.116588	0.114752	0.908642	0.957843	1378.87	-0.0353657	0.161778	-0.218606	0.826957	0.99681	1369.14	0.0102311	0.341943	0.0299204	0.976131	0.998768	1373.9	-0.00617935	0.174617	-0.0353881	0.97177	0.99484
ENSSSCG00000000439	KIF5A	71.5628	-0.585453	0.250067	-2.34118	0.0192227	0.113736	51.2003	-0.0793018	0.46911	-0.169048	0.865759	0.998795	87.5062	-0.909643	0.51153	-1.77828	0.0753581	0.686717	68.4284	-0.587269	0.359538	-1.6334	0.102385	0.492273
ENSSSCG00000000444	DCTN2	1897.2	0.0216404	0.081871	0.264324	0.791531	0.899411	1771.48	0.0367265	0.168805	0.217567	0.827767	0.996826	1926.15	-0.116334	0.177827	-0.6542	0.512983	0.958922	1844.62	-0.0383316	0.0832343	-0.460526	0.645139	0.903422
ENSSSCG00000000449	DTX3	1400.38	0.0182826	0.0742825	0.246123	0.805587	0.907262	1397.93	0.114096	0.177097	0.644254	0.51941	0.993041	1431.48	-0.00655024	0.187117	-0.0350061	0.972075	0.998768	1413.48	0.0562277	0.0956508	0.587844	0.556637	0.865414
ENSSSCG00000000453	ATP23	127.666	0.119644	0.152635	0.783853	0.433126	0.676912	123.321	0.0407371	0.295784	0.137726	0.890457	0.998795	139.51	0.300263	0.358747	0.836977	0.402605	0.928877	130.991	0.149254	0.194963	0.765553	0.443942	0.807083
ENSSSCG00000000455	LRIG3	11.4508	-0.929782	0.500504	-1.85769	0.063213	0.234305	5.06445	-0.504723	1.15303	-0.437735	0.661578	NA	19.8171	-2.02511	0.827874	-2.44616	0.0144387	0.401603	12.0706	-1.60991	0.679024	-2.37091	0.0177442	0.212756
ENSSSCG00000000456	SLC16A7	123.226	0.335655	0.263452	1.27407	0.20264	0.460738	96.6089	-0.132318	0.296274	-0.446605	0.65516	0.995655	174.867	0.276487	0.456874	0.605171	0.545066	0.96456	133.799	0.121472	0.307645	0.394843	0.692958	0.922554
ENSSSCG00000000457	USP15	5512.9	0.154043	0.112563	1.3685	0.171154	0.419337	5365.49	0.0714388	0.232762	0.306918	0.758906	0.995655	5918.27	0.452621	0.306206	1.47816	0.139364	0.789927	5627.44	0.261675	0.189296	1.38236	0.166862	0.584049
ENSSSCG00000000458	MON2	1976.39	-0.0135391	0.0722189	-0.187473	0.851289	0.930694	1748.26	-0.0850571	0.161677	-0.526094	0.598823	0.994088	2019.92	0.0970702	0.188354	0.51536	0.606301	0.967921	1877.14	0.00888188	0.089078	0.099709	0.920575	0.988022
ENSSSCG00000000462	RXYLT1	67.1508	-0.425984	0.183698	-2.31893	0.0203987	0.118505	66.9363	-0.578986	0.436791	-1.32554	0.184991	0.899939	57.5043	-0.632714	0.484433	-1.30609	0.191521	0.836666	62.4222	-0.600944	0.290403	-2.06934	0.0385139	0.315341
ENSSSCG00000000466	XPOT	386.193	-0.0882435	0.142502	-0.619245	0.535755	0.751355	318.878	0.0655322	0.262212	0.24992	0.802649	0.995655	317.864	-0.294932	0.329963	-0.893835	0.37141	0.920068	318.305	-0.107027	0.197262	-0.542562	0.587431	0.877944
ENSSSCG00000000469	LEMD3	1393.19	0.103394	0.0855585	1.20846	0.226871	0.490583	1225.13	-0.0618993	0.158152	-0.39139	0.695509	0.995655	1471.9	0.246928	0.227715	1.08437	0.278199	0.899985	1342.25	0.0995031	0.118337	0.840845	0.400435	0.78157
ENSSSCG00000000473		390.36	-0.0571048	0.127814	-0.446782	0.655032	0.824036	311.822	-0.0100403	0.27363	-0.0366929	0.97073	0.998818	414.71	-0.0685471	0.243234	-0.281815	0.778085	0.986962	360.672	-0.0416095	0.171399	-0.242764	0.808188	0.957977
ENSSSCG00000000475	IRAK3	1454.97	0.303064	0.164341	1.84412	0.0651657	0.238783	977.609	0.0952132	0.324705	0.29323	0.769346	0.995655	1128.92	0.504473	0.208142	2.42369	0.0153636	0.410407	1049.43	0.320436	0.266876	1.20069	0.229872	0.649482
ENSSSCG00000000477	HELB	507.576	-0.0739431	0.100349	-0.736859	0.461208	0.698052	441.852	-0.259943	0.185963	-1.39783	0.162166	0.865077	509.998	-0.0377845	0.200013	-0.18891	0.850163	0.99083	474.169	-0.145539	0.0969521	-1.50115	0.133317	0.536169
ENSSSCG00000000483	MDM1	234.13	0.0631694	0.115221	0.548246	0.583523	0.782655	217.869	-0.0674084	0.240681	-0.280074	0.779421	0.995655	273.57	0.127675	0.323942	0.394129	0.693486	0.979182	244.309	0.038505	0.185111	0.20801	0.835221	0.967607
ENSSSCG00000000486	NUP107	1445.44	-0.00279093	0.0935227	-0.0298423	0.976193	0.987165	1325.87	0.0810136	0.217272	0.372868	0.709247	0.995655	1572.46	-0.0767958	0.20676	-0.371425	0.710321	0.981374	1442.82	0.000734976	0.128236	0.00573142	0.995427	0.999021
ENSSSCG00000000487	SLC35E3	235.893	0.241282	0.129617	1.86151	0.0626726	0.233411	206.657	0.281087	0.236121	1.19044	0.233874	0.929748	232.827	0.398383	0.327154	1.21772	0.22333	0.867317	219.061	0.353811	0.172783	2.04772	0.0405874	0.323858
ENSSSCG00000000488	MDM2	1428.14	0.00020142	0.0858606	0.00234589	0.998128	0.998681	1342.91	0.0613405	0.154258	0.397648	0.69089	0.995655	1473.6	-0.0156829	0.208067	-0.0753743	0.939917	0.998416	1404.81	0.0223529	0.0867249	0.257745	0.796603	0.95523
ENSSSCG00000000493	FRS2	321.46	-0.00183555	0.176578	-0.0103951	0.991706	0.995144	241.433	0.352291	0.296272	1.18908	0.234409	0.930205	283.016	-0.208584	0.379241	-0.550003	0.582317	0.966659	261.183	0.0605795	0.228998	0.264542	0.791363	0.953782
ENSSSCG00000000496	CCT2	97.9712	-0.308518	0.161834	-1.90638	0.0566005	0.219662	90.4226	-0.312453	0.352922	-0.885333	0.375977	0.974844	86.3002	0.0288731	0.376055	0.076779	0.938799	0.998416	88.4415	-0.138836	0.254054	-0.546484	0.584733	0.877047
ENSSSCG00000000500		910.192	0.00611383	0.167817	0.0364315	0.970938	0.984618	754.874	-0.0620548	0.218252	-0.284326	0.77616	0.995655	909.19	0.14251	0.382756	0.372326	0.70965	0.981374	828.189	0.0422898	0.207992	0.203324	0.838882	0.968294
ENSSSCG00000000502	CNOT2	2266.8	-0.0678033	0.0735533	-0.921825	0.35662	0.615376	2145.72	-0.0827897	0.158528	-0.52224	0.601503	0.994088	2407.26	-0.0467519	0.216281	-0.216163	0.828861	0.989698	2269.54	-0.0619452	0.101869	-0.608087	0.54313	0.858019
ENSSSCG00000000509	ZFC3H1	2718.23	-0.122412	0.0887577	-1.37917	0.167842	0.414161	2421.51	-0.0966803	0.189971	-0.508921	0.610807	0.994088	2739.13	-0.0458423	0.205029	-0.223589	0.823077	0.989273	2572.11	-0.0705403	0.108012	-0.653081	0.513704	0.844478
ENSSSCG00000000510	TMEM19	3043.18	-0.0514826	0.100545	-0.512037	0.608625	0.79902	2523.14	-0.238065	0.149445	-1.59299	0.111161	0.790795	3092.3	0.239354	0.257514	0.92948	0.352641	0.920068	2793.35	0.0127588	0.148749	0.0857743	0.931646	0.9898
ENSSSCG00000000512	TBC1D15	2414.05	0.00184139	0.117645	0.0156521	0.987512	0.99325	2341.79	-0.109885	0.249291	-0.440792	0.659363	0.995655	2446.42	0.27043	0.225954	1.19684	0.23137	0.873496	2391.05	0.0714637	0.166789	0.428468	0.668311	0.910861
ENSSSCG00000000517	CAPS2	11.188	0.504648	0.411709	1.22574	0.220297	0.48262	9.62498	0.450866	0.880102	0.512288	0.60845	0.994088	11.9899	-0.230097	0.853096	-0.26972	0.787376	0.988618	10.7501	-0.0851099	0.565022	-0.150631	0.880267	0.978018
ENSSSCG00000000519	GLIPR1	856.931	0.0594331	0.106645	0.557298	0.577324	0.779127	907.897	0.127818	0.172019	0.743045	0.457454	0.98867	828.309	-0.146279	0.224399	-0.651868	0.514486	0.958922	869.813	0.00798869	0.177313	0.0450543	0.964064	0.994712
ENSSSCG00000000521	PHLDA1	14.6501	-0.197191	0.555524	-0.354965	0.722616	0.865504	12.1586	-0.347349	1.02034	-0.340426	0.733536	0.995655	15.4673	1.9573	0.900638	2.17324	0.0297626	0.524762	13.729	0.751651	0.708089	1.06152	0.288453	0.701792
ENSSSCG00000000522	NAP1L1	9029.15	0.0146183	0.0777884	0.187924	0.850936	0.930606	8541.61	-0.13398	0.157172	-0.852439	0.39397	0.982935	9280.2	0.0293316	0.1908	0.153729	0.877823	0.99083	8891.22	-0.0530849	0.0929844	-0.570901	0.568067	0.870872
ENSSSCG00000000523	BBS10	58.6312	-0.314045	0.243679	-1.28876	0.19748	0.453934	41.2112	-0.837259	0.449703	-1.8618	0.0626309	0.656161	54.9062	-0.0265715	0.557968	-0.047622	0.962018	0.998521	47.7087	-0.379972	0.339198	-1.12021	0.262626	0.679132
ENSSSCG00000000528	PKP2	48.9708	-0.26066	0.249277	-1.04566	0.295717	0.560617	46.7671	-0.0624114	0.450796	-0.138447	0.889887	0.998795	33.8734	-0.22555	0.632604	-0.356542	0.721435	0.983197	40.6306	-0.148975	0.417503	-0.356825	0.721223	0.931536
ENSSSCG00000000530		1908.73	-0.0214758	0.124445	-0.172572	0.862988	0.936786	1638.4	-0.0296868	0.238865	-0.124283	0.901091	0.998795	2060.6	-0.127357	0.222397	-0.572657	0.566877	0.96543	1838.95	-0.0733576	0.160568	-0.456863	0.647769	0.904193
ENSSSCG00000000531	BICD1	12.0658	-0.0210992	0.334789	-0.0630223	0.949749	0.975079	5.10153	-0.18469	1.18163	-0.156301	0.875796	NA	10.9911	0.215541	0.821782	0.262285	0.793102	0.988618	7.90298	0.0526908	0.567753	0.092806	0.926058	NA
ENSSSCG00000000534	IPO8	1181.42	0.0319196	0.102949	0.310052	0.756521	0.883397	958.572	0.0705413	0.180315	0.391211	0.695642	0.995655	1053.19	-0.0952753	0.218801	-0.435444	0.66324	0.978874	1003.38	-0.0121228	0.105952	-0.114418	0.908907	0.985386
ENSSSCG00000000536	ERGIC2	743.132	0.0324522	0.105743	0.306896	0.758922	0.884225	687.028	-0.0104465	0.223426	-0.0467562	0.962708	0.998818	801.042	-0.0477903	0.232856	-0.205235	0.837389	0.990719	741.108	-0.0367647	0.134512	-0.27332	0.784607	0.950743
ENSSSCG00000000541	FAR2	253.905	0.134856	0.129781	1.03911	0.298756	0.563569	222.676	0.164378	0.257826	0.637554	0.523764	0.993041	249.35	0.330483	0.289971	1.13971	0.254407	0.886075	235.321	0.245864	0.158802	1.54824	0.121564	0.520188
ENSSSCG00000000545	KLHL42	72.9483	-0.134466	0.138424	-0.971412	0.331343	0.593592	58.6692	-0.032385	0.395268	-0.0819318	0.934701	0.998795	68.9833	-0.316602	0.452989	-0.698917	0.484604	0.952351	63.5543	-0.175458	0.245193	-0.715591	0.474244	0.824203
ENSSSCG00000000547	MRPS35	280.934	-0.157347	0.120883	-1.30165	0.193038	0.449229	241.743	-0.308543	0.224609	-1.37369	0.169538	0.877617	280.676	-0.248235	0.247977	-1.00104	0.316806	0.911283	260.204	-0.277915	0.12308	-2.25799	0.023946	0.252155
ENSSSCG00000000549	PPFIBP1	71.5246	-0.0503162	0.324699	-0.154963	0.876851	0.942944	62.446	-0.586161	0.7646	-0.766625	0.443305	0.986209	84.9084	-0.578708	0.506724	-1.14206	0.25343	0.884775	73.1149	-0.502658	0.487809	-1.03044	0.302804	0.713637
ENSSSCG00000000553	TM7SF3	3445.46	0.291013	0.245533	1.18523	0.235927	0.500335	3314.37	0.0772903	0.174077	0.444002	0.657041	0.995655	4133.73	-0.243255	0.278511	-0.873413	0.382438	0.9223	3703.63	-0.0944211	0.160872	-0.586934	0.557248	0.865414
ENSSSCG00000000554	FGFR1OP2	6059.44	0.378551	0.140293	2.69829	0.0069696	0.0573414	6434.2	0.360782	0.195119	1.84904	0.064452	0.665741	6634.48	0.62498	0.411126	1.52017	0.128469	0.77393	6528.49	0.479866	0.227842	2.10613	0.0351926	0.30187
ENSSSCG00000000555	ITPR2	5739.23	-0.227893	0.118115	-1.92942	0.0536788	0.213752	4278.79	-0.307498	0.238256	-1.29062	0.196836	0.902748	5225.63	-0.286933	0.196747	-1.45839	0.144734	0.796679	4728.36	-0.29593	0.153296	-1.93045	0.0535516	0.369554
ENSSSCG00000000559	RASSF8	75.3777	-0.0550234	0.233965	-0.235178	0.81407	0.911857	65.6361	-0.000381159	0.514497	-0.000740838	0.999409	0.999779	98.702	-0.0317601	0.385528	-0.0823808	0.934344	0.998093	81.3495	-0.0243001	0.310428	-0.0782794	0.937606	0.991223
ENSSSCG00000000563		1739.7	-0.0643136	0.0912475	-0.704826	0.480919	0.712972	1476.43	-0.00327126	0.197557	-0.0165585	0.986789	0.999052	1720.67	-0.0761638	0.214027	-0.35586	0.721946	0.983197	1592.17	-0.0488231	0.134632	-0.362642	0.716873	0.930848
ENSSSCG00000000567	SOX5	226.196	-0.777601	0.18456	-4.21327	2.51697e-05	0.00100048	219.6	-1.23152	0.31741	-3.87991	0.000104493	0.0132982	187.855	-0.64704	0.371246	-1.74289	0.0813537	0.699465	204.411	-0.931114	0.25849	-3.60213	0.000315624	0.0190748
ENSSSCG00000000570	C2CD5	2483.22	0.0420403	0.0822907	0.510876	0.609438	0.799377	2279.83	0.00493504	0.19092	0.0258487	0.979378	0.998818	2487.87	0.0356946	0.194829	0.18321	0.854633	0.99083	2378.36	0.0209986	0.104247	0.20143	0.840362	0.968907
ENSSSCG00000000576		1980.15	0.271855	0.105704	2.57185	0.0101157	0.0739907	1635.32	0.118882	0.185829	0.639736	0.522344	0.993041	1849.74	0.209024	0.214803	0.973095	0.330506	0.914316	1736.96	0.157182	0.115663	1.35897	0.174158	0.594458
ENSSSCG00000000579	GOLT1B	450.006	-0.229381	0.113317	-2.02424	0.0429455	0.18725	394.325	-0.1545	0.244335	-0.632328	0.527173	0.993041	442.174	-0.187133	0.243467	-0.768619	0.442119	0.942955	416.967	-0.175189	0.137885	-1.27055	0.20389	0.6275
ENSSSCG00000000580	RECQL	784.881	-0.144616	0.105686	-1.36836	0.1712	0.41935	717.867	-0.0874593	0.181271	-0.482478	0.629466	0.995655	831.652	-0.207393	0.203234	-1.02046	0.307509	0.906681	771.803	-0.150052	0.0957065	-1.56783	0.116921	0.513312
ENSSSCG00000000583	PYROXD1	283.814	-0.0375913	0.14988	-0.250809	0.801962	0.904916	246.66	-0.155306	0.247526	-0.627432	0.530376	0.993041	278.98	0.141809	0.281826	0.503178	0.614839	0.969622	261.97	-0.00429107	0.152735	-0.0280948	0.977587	0.996079
ENSSSCG00000000587	AEBP2	1054.56	-0.120599	0.099757	-1.20893	0.226691	0.490449	859.677	-0.285761	0.209225	-1.36581	0.171999	0.879232	1042.35	-0.132263	0.184791	-0.715742	0.474151	0.951327	946.391	-0.203861	0.130921	-1.55712	0.119441	0.517749
ENSSSCG00000000588	PLEKHA5	31.5259	-0.521569	0.395741	-1.31795	0.187519	0.442418	24.1893	-1.61877	0.674455	-2.40011	0.0163902	0.369689	39.5343	-0.794262	0.555622	-1.4295	0.15286	0.808746	31.4728	-1.11928	0.416419	-2.68788	0.0071908	0.128019
ENSSSCG00000000599	DERA	826.839	0.0895807	0.110048	0.814016	0.415636	0.663393	699.173	0.201269	0.200136	1.00566	0.314579	0.961608	795.155	-0.0877581	0.200091	-0.438591	0.660958	0.977667	744.679	0.0564215	0.114622	0.492238	0.622551	0.895935
ENSSSCG00000000600	EPS8	88.5928	0.230949	0.224124	1.03045	0.302799	0.567738	58.7467	0.631428	0.520879	1.21224	0.225422	0.924928	124.981	-0.00495485	0.414348	-0.0119582	0.990459	0.998768	90.2598	0.194599	0.399157	0.487524	0.625887	0.897349
ENSSSCG00000000601	PTPRO	198.666	0.603187	0.24232	2.48922	0.0128025	0.0877458	290.406	1.46613	0.337109	4.34913	1.36682e-05	0.00292672	167.482	-0.083862	0.469777	-0.178514	0.858319	0.99083	231.882	0.895256	0.40258	2.2238	0.0261619	0.263713
ENSSSCG00000000605	ERP27	25.9279	-0.186191	0.353712	-0.526393	0.598615	0.792359	18.1338	0.778076	0.698989	1.11315	0.265646	0.950817	24.2555	-0.527123	0.576133	-0.914932	0.360227	0.920068	21.04	0.0512122	0.394759	0.12973	0.89678	0.981633
ENSSSCG00000000607	ART4	95.0157	-0.0252532	0.267321	-0.0944674	0.924738	0.96405	95.2373	-0.343566	0.34111	-1.0072	0.313839	0.960992	92.5486	1.03273	0.578035	1.78662	0.0739984	0.683725	93.9427	0.278931	0.362307	0.769874	0.441374	0.80558
ENSSSCG00000000611		3059.25	-0.262451	0.108082	-2.42826	0.0151716	0.097791	2400.32	-0.479514	0.215073	-2.22954	0.0257782	0.455554	2248.93	-0.0172855	0.204204	-0.0846479	0.932541	0.997528	2327.7	-0.261733	0.157644	-1.66028	0.096858	0.483107
ENSSSCG00000000612	ATF7IP	5189.58	0.201371	0.0895967	2.24753	0.0246061	0.131857	4430.23	0.178267	0.183396	0.972032	0.331035	0.967942	5231.9	0.327752	0.18209	1.79994	0.0718694	0.682083	4810.76	0.258668	0.109816	2.35546	0.0184996	0.218264
ENSSSCG00000000614	GRIN2B	12.2739	0.0514885	0.43192	0.119209	0.90511	0.956651	8.89282	0.176207	0.888235	0.198379	0.842749	0.997873	17.2129	0.257099	0.898944	0.286001	0.774877	0.986962	12.8436	0.247888	0.550734	0.450104	0.652636	0.905313
ENSSSCG00000000619	FAM234B	267.871	0.310892	0.155021	2.00548	0.0449113	0.191925	285.574	0.266312	0.244924	1.08732	0.276894	0.955745	285.628	0.419133	0.460634	0.909905	0.362873	0.920068	285.551	0.327229	0.247578	1.32172	0.186261	0.606019
ENSSSCG00000000623	BCL2L14	64.8896	1.25071	0.183703	6.80831	9.87488e-12	6.92073e-09	80.5176	1.30962	0.480946	2.72302	0.00646886	0.229042	55.0111	0.971665	0.549808	1.76728	0.0771812	0.690975	68.3629	1.15155	0.375096	3.07	0.00214058	0.06204
ENSSSCG00000000625	LRP6	207.972	0.116992	0.132029	0.88611	0.375558	0.631999	166.911	-0.230353	0.279614	-0.823825	0.410039	0.983944	206.819	0.234529	0.300962	0.779263	0.435825	0.942458	185.875	0.0115363	0.233484	0.0494095	0.960593	0.99439
ENSSSCG00000000633	YBX3	12366.3	0.320325	0.11757	2.72454	0.00643914	0.0547045	10768.5	0.0851857	0.145859	0.584029	0.559201	0.993215	12148.2	0.253224	0.346328	0.73117	0.464675	0.948063	11423.6	0.170704	0.173446	0.984191	0.325021	0.732076
ENSSSCG00000000634	STYK1	6.65216	0.347518	0.500406	0.694471	0.487387	NA	6.05777	1.68773	1.08811	1.55105	0.120889	NA	9.64432	-0.369339	0.864897	-0.427032	0.669356	0.978874	7.76285	0.436805	0.586836	0.744339	0.456671	NA
ENSSSCG00000000635	MAGOHB	181.43	-0.293893	0.150955	-1.94689	0.0515481	0.208866	139.071	-0.11137	0.294529	-0.37813	0.705334	0.995655	187.489	-0.356388	0.347231	-1.02637	0.304717	0.906202	162.036	-0.261138	0.22835	-1.14359	0.252795	0.671124
ENSSSCG00000000636		89.8141	-0.469001	0.203402	-2.30578	0.0211228	0.121342	65.2946	-0.570771	0.503473	-1.13367	0.256934	0.9448	75.1322	-0.148104	0.372339	-0.397767	0.690802	0.979182	69.9561	-0.390174	0.291281	-1.33951	0.180404	0.600173
ENSSSCG00000000639		93.0678	-0.446106	0.266677	-1.67283	0.0943598	0.297414	56.5943	-1.20358	0.628625	-1.91462	0.0555406	0.629087	129.228	0.0381151	0.46845	0.0813643	0.935152	0.998093	91.1103	-0.575866	0.498258	-1.15576	0.24778	0.665204
ENSSSCG00000000640		98.9031	-0.711308	0.272502	-2.61028	0.00904669	0.0685904	80.2888	-0.344602	0.407192	-0.846289	0.397391	0.983636	67.4451	-0.98974	0.537201	-1.8424	0.0654164	0.666765	74.1625	-0.674596	0.36998	-1.82333	0.0682537	0.412743
ENSSSCG00000000642	KLRD1	29.2699	-0.448645	0.323045	-1.3888	0.164893	0.410645	18.7502	-0.168523	0.731833	-0.230275	0.817878	0.99681	25.3108	0.170996	0.634759	0.269388	0.787631	0.988618	21.868	-0.0257613	0.411996	-0.0625279	0.950142	0.992949
ENSSSCG00000000645	GABARAPL1	13139	0.0554078	0.137554	0.402807	0.68709	0.844342	10309.2	0.00434229	0.194013	0.0223815	0.982144	0.998917	12243	0.249221	0.344687	0.723035	0.469658	0.949076	11227.5	0.112498	0.209529	0.53691	0.59133	0.87991
ENSSSCG00000000647	OLR1	1223.43	1.582	0.276705	5.71729	1.08234e-08	2.35275e-06	738.6	1.22035	0.342822	3.55972	0.000371254	0.0333882	913.792	1.94947	0.533325	3.6553	0.000256877	0.054115	821.788	1.6194	0.336834	4.80769	1.52685e-06	0.000489936
ENSSSCG00000000648	CLEC7A	270.924	1.03463	0.184717	5.60119	2.12881e-08	4.23093e-06	270.171	0.994119	0.247535	4.01607	5.91756e-05	0.00886976	303.357	0.691172	0.410583	1.68339	0.0922992	0.718625	285.94	0.84303	0.219632	3.83838	0.00012385	0.00980203
ENSSSCG00000000649	CLEC1A	30.9989	0.832151	0.393203	2.11634	0.0343159	0.162244	30.3222	0.295428	0.516944	0.571489	0.567668	0.993215	37.1361	0.539796	0.494494	1.09161	0.275003	0.899985	33.5587	0.426414	0.348567	1.22334	0.221203	0.641798
ENSSSCG00000000650	CLEC1B	2560.96	0.497375	0.441826	1.12573	0.260282	0.524761	3035.18	0.135657	0.254978	0.532033	0.594703	0.993504	3021.4	-0.316652	0.429147	-0.737863	0.460598	0.948063	3028.37	-0.081304	0.252983	-0.321381	0.747921	0.940976
ENSSSCG00000000651	CLEC12B	210.773	0.17335	0.488551	0.354825	0.722721	0.865504	217.098	-0.159058	0.225874	-0.70419	0.481315	0.98867	264.352	-0.45225	0.291178	-1.55317	0.120382	0.763493	239.506	-0.334498	0.266883	-1.25335	0.210078	0.632817
ENSSSCG00000000653	CD69	8858.73	0.531481	0.168329	3.1574	0.00159184	0.0210706	9495.48	0.737317	0.302626	2.43639	0.0148346	0.355661	8923.83	0.709499	0.239614	2.96101	0.0030663	0.211043	9222.28	0.725276	0.202316	3.58487	0.000337243	0.0202001
ENSSSCG00000000656	CLEC2B	350.11	0.160738	0.147452	1.0901	0.275668	0.541752	342.666	0.318908	0.249065	1.28042	0.200397	0.903134	362.29	0.43661	0.378858	1.15244	0.249141	0.880565	351.939	0.36964	0.209116	1.76763	0.0771234	0.434158
ENSSSCG00000000657		7126.06	0.505503	0.106012	4.76837	1.85718e-06	0.000131544	7334.78	0.601162	0.215263	2.79268	0.00522729	0.203119	7759.31	0.404412	0.220118	1.83725	0.066173	0.670588	7535.48	0.510235	0.140156	3.64048	0.000272134	0.0175481
ENSSSCG00000000660	A2M	379.951	0.489212	0.230538	2.12205	0.0338336	0.160788	231.849	-0.322781	0.264624	-1.21977	0.222551	0.924201	543.57	0.68501	0.386712	1.77137	0.0764991	0.688574	380.087	0.335734	0.37092	0.905139	0.365392	0.758531
ENSSSCG00000000661	PHC1	480.739	-0.190422	0.105283	-1.80866	0.0705033	0.249965	283.745	-0.285704	0.335814	-0.85078	0.394891	0.98314	375.889	-0.229941	0.30313	-0.758558	0.448117	0.944547	327.498	-0.263275	0.215997	-1.21889	0.222887	0.643774
ENSSSCG00000000663	KLRG1	412.527	-0.335197	0.157874	-2.12319	0.0337379	0.160677	314.273	-0.444479	0.336913	-1.31927	0.187079	0.901207	462.501	-0.100181	0.296107	-0.338327	0.735117	0.983291	384.667	-0.244917	0.243743	-1.00482	0.314985	0.723461
ENSSSCG00000000683	CDCA3	214.691	0.0623102	0.152824	0.407725	0.683476	0.842804	237.04	0.461417	0.242273	1.90453	0.0568411	0.634672	248.255	-0.216154	0.294202	-0.734714	0.462514	0.948063	242.286	0.141877	0.223167	0.635742	0.524945	0.848847
ENSSSCG00000000684	USP5	2111.35	0.0415072	0.101129	0.410438	0.681485	0.841726	2027.83	0.108468	0.184456	0.588045	0.556502	0.993215	2046.42	-0.168716	0.213833	-0.789006	0.430109	0.93928	2036.13	-0.0261832	0.128201	-0.204235	0.83817	0.968119
ENSSSCG00000000685	TPI1	3678.63	4.3955e-05	0.0919712	0.000477921	0.999619	0.999619	3569.45	0.00660646	0.175107	0.0377282	0.969904	0.998818	3732.44	-0.186379	0.207518	-0.898134	0.369114	0.920068	3646.07	-0.0865384	0.109737	-0.788595	0.430349	0.800438
ENSSSCG00000000687	CD4	899.001	-0.121696	0.12256	-0.992945	0.320737	0.584898	549.351	-0.142708	0.221598	-0.643993	0.51958	0.993041	810.582	-0.387396	0.370132	-1.04664	0.295265	0.903528	673.392	-0.283749	0.232298	-1.22149	0.221901	0.642301
ENSSSCG00000000688	LAG3	52.9899	0.224198	0.287492	0.779843	0.435483	0.67853	49.8241	0.862753	0.442631	1.94915	0.0512778	0.60732	42.1648	0.203512	0.672517	0.302613	0.762185	0.98534	46.1728	0.568395	0.36608	1.55265	0.120506	0.519165
ENSSSCG00000000690	MLF2	1619.95	0.00496233	0.0839456	0.0591137	0.952862	0.976474	1364.91	-0.0319696	0.224974	-0.142103	0.886998	0.998795	1446.06	0.0173888	0.198903	0.0874234	0.930335	0.997528	1403.19	-0.00558355	0.126767	-0.0440456	0.964868	0.994712
ENSSSCG00000000691	COPS7A	331.317	0.188774	0.0964005	1.95823	0.0502033	0.205694	315.723	0.375271	0.210074	1.78637	0.0740387	0.69408	344.833	0.0146861	0.214008	0.068624	0.945289	0.998416	329.505	0.195396	0.140885	1.38692	0.165466	0.582272
ENSSSCG00000000693	NCAPD2	1697.19	-0.26079	0.0992583	-2.62739	0.00860436	0.0663822	1515.23	-0.0956913	0.195175	-0.490286	0.623932	0.99491	1744.75	-0.381837	0.268968	-1.41964	0.155712	0.809912	1623.76	-0.231329	0.160184	-1.44414	0.148699	0.557602
ENSSSCG00000000694	GAPDH	55670.7	0.00605494	0.119417	0.0507042	0.959561	0.979177	61034.9	-0.199712	0.181072	-1.10294	0.270053	0.952738	64283.9	0.101022	0.177868	0.567958	0.570064	0.96598	62565.2	-0.0495498	0.11174	-0.443437	0.65745	0.906093
ENSSSCG00000000695	IFFO1	380.698	-0.0288167	0.109136	-0.264043	0.791747	0.899411	316.403	-0.0974715	0.19749	-0.493552	0.621623	0.99491	300.652	0.255218	0.282878	0.90222	0.36694	0.920068	308.847	0.0650803	0.156651	0.415447	0.677815	0.915046
ENSSSCG00000000696		579.706	0.0236091	0.088824	0.265796	0.790396	0.899029	479.421	0.0180593	0.238206	0.0758136	0.939567	0.998795	555.797	0.103182	0.234069	0.440819	0.659344	0.977229	515.618	0.0747136	0.181813	0.410937	0.681119	0.916359
ENSSSCG00000000697		6466.81	-0.0319146	0.0786888	-0.40558	0.685051	0.843532	5012.36	-0.0199247	0.184744	-0.10785	0.914115	0.998795	5496.71	-0.179704	0.290285	-0.619062	0.535876	0.962346	5241.17	-0.101202	0.155461	-0.650984	0.515057	0.844729
ENSSSCG00000000699	LPAR5	113.077	-0.908383	0.272682	-3.33129	0.000864442	0.0137336	66.5866	-1.40999	0.479721	-2.93918	0.00329082	0.149331	59.0519	-0.800622	0.567687	-1.41032	0.158445	0.810357	62.9837	-1.08757	0.348521	-3.12053	0.00180526	0.0567121
ENSSSCG00000000700	ACRBP	147.835	-0.174162	0.14423	-1.20753	0.227227	0.491035	125.541	-0.101967	0.304225	-0.33517	0.737496	0.995655	148.658	-0.112337	0.300502	-0.37383	0.708531	0.981374	136.508	-0.122343	0.180591	-0.677459	0.498115	0.836438
ENSSSCG00000000702	ZNF384	1282.87	-0.0199299	0.0902672	-0.220788	0.825258	0.9172	1072.95	0.0375277	0.185465	0.202344	0.839648	0.997873	1095.33	-0.174962	0.249508	-0.701226	0.483162	0.952351	1083.31	-0.0615566	0.132976	-0.462914	0.643426	0.902959
ENSSSCG00000000703		1222.01	-0.377186	0.135975	-2.77394	0.00553825	0.0498292	966.982	-0.115851	0.21173	-0.547164	0.584266	0.993215	1078.83	-0.366277	0.260358	-1.40682	0.159481	0.810357	1019.99	-0.248023	0.148593	-1.66914	0.0950894	0.479588
ENSSSCG00000000704	TAPBPL	493.842	-0.169026	0.148171	-1.14075	0.253975	0.519643	335.467	-0.0738177	0.264659	-0.278916	0.780309	0.995655	427.722	-0.49017	0.477928	-1.02562	0.305073	0.906226	379.213	-0.310271	0.279157	-1.11146	0.266371	0.682914
ENSSSCG00000000705	CD27	548.726	-0.33738	0.1086	-3.10662	0.00189241	0.0240302	446.081	-0.302374	0.23802	-1.27037	0.203951	0.908321	487.512	-0.419541	0.279181	-1.50275	0.132903	0.777138	465.647	-0.358298	0.152658	-2.34706	0.018922	0.220408
ENSSSCG00000000706	LTBR	60.4734	0.00491986	0.377859	0.0130204	0.989612	0.99376	83.9411	0.370663	0.52494	0.706104	0.480123	0.98867	45.5039	-1.00124	0.731841	-1.36812	0.171275	0.81901	65.6457	0.25661	0.556316	0.461268	0.644607	0.902959
ENSSSCG00000000708	TNFRSF1A	796.348	0.379376	0.133479	2.84222	0.00448001	0.043608	572.536	0.558567	0.21307	2.62152	0.00875394	0.273906	683.432	0.31534	0.374064	0.843011	0.399222	0.928571	625.117	0.442842	0.20221	2.19001	0.0285232	0.274773
ENSSSCG00000000712	VWF	14055	0.580342	0.487707	1.18994	0.23407	0.4987	11608.8	0.0461092	0.302589	0.152382	0.878885	0.998795	13272.4	-0.390069	0.563312	-0.692456	0.488651	0.953818	12399.7	-0.177623	0.339955	-0.52249	0.601329	0.886126
ENSSSCG00000000719	NDUFA9	610.349	0.148256	0.0833026	1.77973	0.07512	0.259615	613.759	0.226987	0.171585	1.32288	0.185874	0.901207	620.518	0.0403842	0.194944	0.207158	0.835887	0.989827	616.813	0.140001	0.105075	1.33239	0.182732	0.60235
ENSSSCG00000000720	AKAP3	172.592	-0.272126	0.196618	-1.38404	0.166347	0.41295	160.405	-0.0900706	0.253716	-0.355006	0.722585	0.995655	149.225	-0.744071	0.356527	-2.087	0.0368882	0.556814	155.044	-0.388007	0.229752	-1.68881	0.0912555	0.470556
ENSSSCG00000000721	DYRK4	32.4892	-0.373679	0.290612	-1.28584	0.198501	0.455024	37.3117	0.345734	0.543487	0.63614	0.524685	0.993041	28.2523	-0.627913	0.766847	-0.818824	0.412887	0.930669	32.9918	-0.105882	0.489194	-0.216442	0.828643	0.965343
ENSSSCG00000000722	RAD51AP1	47.8817	-0.263911	0.263812	-1.00037	0.31713	0.581549	39.3987	-0.307682	0.503909	-0.61059	0.541471	0.993215	54.9544	-0.844129	0.44895	-1.88023	0.0600769	0.647242	46.7775	-0.560397	0.311502	-1.79902	0.0720159	0.420884
ENSSSCG00000000723	C12orf4	800.446	0.0797153	0.0943641	0.844763	0.398243	0.650835	771.566	0.19221	0.183506	1.04743	0.294901	0.960992	931.462	0.0934694	0.226022	0.41354	0.679211	0.979182	847.479	0.146898	0.116881	1.25681	0.208821	0.631325
ENSSSCG00000000728	PARP11	202.121	0.716951	0.237781	3.01517	0.00256834	0.0295082	199.024	1.14573	0.340279	3.36703	0.000759829	0.055108	197.088	0.878927	0.54537	1.61161	0.107046	0.73981	198.044	0.9843	0.318482	3.0906	0.00199753	0.0592966
ENSSSCG00000000732	CRACR2A	317.894	0.0929315	0.173782	0.534758	0.592817	0.788525	228.603	0.479823	0.267691	1.79245	0.0730609	0.691158	261.085	0.225535	0.334025	0.675204	0.499546	0.95618	244.014	0.345625	0.184693	1.87135	0.0612969	0.394093
ENSSSCG00000000734	TSPAN11	22.5723	0.431877	0.382123	1.13021	0.258389	0.523967	18.0506	0.00889122	0.86425	0.0102878	0.991792	0.999052	21.742	0.97795	0.757706	1.29067	0.196817	0.839763	19.7978	0.485936	0.536415	0.905897	0.36499	0.758418
ENSSSCG00000000735	TSPAN9	1185.82	0.338853	0.410263	0.82594	0.408838	0.658875	875.992	0.0225322	0.257884	0.0873732	0.930375	0.998795	1329.62	-0.493518	0.357319	-1.38117	0.167227	0.814712	1091.76	-0.274028	0.248243	-1.10387	0.26965	0.686635
ENSSSCG00000000737	TULP3	9.5087	0.126609	0.443906	0.285216	0.775478	NA	7.08201	-0.219364	1.14143	-0.192184	0.847598	0.998699	16.6463	0.356172	0.675339	0.527397	0.597918	0.966831	11.6309	0.0501744	0.597668	0.0839504	0.933096	0.990886
ENSSSCG00000000738	RHNO1	219.382	-0.282346	0.172886	-1.63313	0.102442	0.311448	214.675	-0.064069	0.326966	-0.19595	0.844649	0.997873	243.997	-0.530756	0.425345	-1.24783	0.212095	0.852551	228.501	-0.288863	0.25946	-1.11332	0.26557	0.681996
ENSSSCG00000000739	FOXM1	737.685	0.12598	0.145489	0.865907	0.386541	0.641062	799.133	0.242093	0.259387	0.933326	0.350652	0.967942	872.307	0.40009	0.189685	2.10924	0.0349243	0.549549	833.782	0.33986	0.164208	2.0697	0.0384809	0.315341
ENSSSCG00000000742	ITFG2	421.863	-0.202822	0.133973	-1.5139	0.13005	0.359157	378.748	-0.534392	0.233199	-2.29157	0.0219306	0.427521	416.099	-0.0508654	0.223224	-0.227868	0.819749	0.989273	396.397	-0.286582	0.144364	-1.98513	0.0471299	0.348793
ENSSSCG00000000743	FKBP4	1936.12	-0.230339	0.0853134	-2.69992	0.00693571	0.057151	2093.72	-0.155014	0.163417	-0.948579	0.342835	0.967942	2129.47	-0.309685	0.248427	-1.24658	0.212551	0.853875	2109.98	-0.22842	0.124594	-1.83332	0.0667552	0.408379
ENSSSCG00000000744		12.1787	-0.134632	0.405755	-0.331805	0.740036	0.874329	14.0469	-0.34898	0.785881	-0.444062	0.656998	0.995655	9.04286	0.630433	0.860956	0.732248	0.464017	0.948063	11.6647	-0.0239208	0.537576	-0.0444976	0.964508	0.994712
ENSSSCG00000000745	DDX11	486.119	-0.207368	0.0914756	-2.26692	0.0233952	0.128413	409.02	-0.0728313	0.18839	-0.386599	0.699053	0.995655	393.06	-0.221969	0.220294	-1.0076	0.313646	0.911283	401.302	-0.134137	0.144069	-0.931066	0.351819	0.749939
ENSSSCG00000000746	WASHC1	754.093	0.00606931	0.0987999	0.0614303	0.951016	0.97571	724.61	0.10789	0.179093	0.602421	0.546894	0.993215	813.237	-0.0398048	0.237369	-0.167692	0.866826	0.99083	766.604	0.0331385	0.111598	0.296946	0.766508	0.946852
ENSSSCG00000000749	SLC6A12	26.4923	0.261209	0.36289	0.719802	0.471647	0.707023	8.47132	0.294536	1.00151	0.294091	0.768688	0.995655	10.0773	0.202597	0.960405	0.21095	0.832926	0.989698	9.23254	0.291517	0.564052	0.516826	0.605277	0.887645
ENSSSCG00000000751	CCDC77	181.484	-0.100861	0.118977	-0.847729	0.396589	0.649494	179.56	-0.129612	0.247277	-0.524158	0.600168	0.994088	206.967	-0.104663	0.29022	-0.360633	0.718373	0.983197	192.553	-0.113875	0.141992	-0.80198	0.422565	0.795378
ENSSSCG00000000753	WNK1	9427.68	-0.0802573	0.103896	-0.772474	0.439834	0.681505	7257.55	-0.133129	0.159521	-0.834552	0.40397	0.983944	8068.39	0.188991	0.191465	0.987081	0.323603	0.911283	7641.84	0.0347002	0.120838	0.287162	0.773988	0.94819
ENSSSCG00000000754	RAD52	421.025	0.105414	0.117055	0.900553	0.367826	0.625779	339.393	0.0463217	0.241637	0.1917	0.847977	0.998709	438.594	-0.0406007	0.221864	-0.182998	0.854799	0.99083	386.496	-0.00329698	0.146366	-0.0225255	0.982029	0.99627
ENSSSCG00000000755	ERC1	2247.2	-0.0499628	0.0798085	-0.626034	0.531293	0.749042	1802.14	-0.134704	0.171556	-0.785192	0.432341	0.983944	2256.44	0.0131073	0.193088	0.0678829	0.945879	0.998416	2017.91	-0.0545162	0.112685	-0.483791	0.628534	0.897926
ENSSSCG00000000757	ADIPOR2	1343.86	0.165983	0.0764024	2.17249	0.0298187	0.148192	1026.02	0.0453357	0.156164	0.290309	0.77158	0.995655	1268.3	0.178632	0.190589	0.937263	0.348623	0.920052	1141.05	0.11653	0.0964846	1.20776	0.227141	0.647075
ENSSSCG00000000759	WNT5B	143.898	0.301008	0.286049	1.0523	0.292664	0.557287	202.545	0.625335	0.359319	1.74033	0.0818005	0.712848	117.035	0.0968972	0.488393	0.1984	0.842732	0.99083	161.83	0.599109	0.392507	1.52636	0.126919	0.526265
ENSSSCG00000000764	HDHD5	63.5818	-0.0477065	0.165853	-0.287644	0.773619	0.890749	56.5519	-0.278028	0.400136	-0.694832	0.487161	0.988754	58.4086	-0.00877306	0.414134	-0.0211841	0.983099	0.998768	57.4169	-0.144013	0.222061	-0.648531	0.516642	0.844895
ENSSSCG00000000765	IL17RA	3335.99	0.125285	0.132525	0.945364	0.344473	0.604826	2588.22	-0.0645505	0.246782	-0.261569	0.793654	0.995655	2624.82	0.371529	0.214334	1.73341	0.0830224	0.703942	2605.15	0.143349	0.163941	0.874397	0.381902	0.771167
ENSSSCG00000000766	CECR2	175.713	-0.123548	0.187621	-0.658501	0.510216	0.734888	134.499	0.0700339	0.378144	0.185204	0.853069	0.998795	120.04	-0.380589	0.406904	-0.935328	0.349619	0.920068	127.597	-0.161997	0.267014	-0.6067	0.54405	0.858142
ENSSSCG00000000767	ATP6V1E1	18578.9	0.0533183	0.121596	0.438487	0.661033	0.828443	19009.1	-0.0669566	0.21549	-0.310718	0.756015	0.995655	20210.5	0.421944	0.293694	1.43668	0.150809	0.806777	19576.8	0.171784	0.18003	0.954196	0.339984	0.741783
ENSSSCG00000000769		1484.67	0.0402572	0.147362	0.273186	0.78471	0.896773	1185.08	0.189091	0.181613	1.04117	0.297795	0.960992	1432.92	0.214278	0.326502	0.656283	0.511642	0.958922	1302.63	0.212606	0.171223	1.24169	0.21435	0.637704
ENSSSCG00000000770	MICAL3	222.067	-0.00860885	0.130096	-0.0661731	0.94724	0.974035	174.186	0.0966133	0.275174	0.351099	0.725514	0.995655	202.857	0.00285308	0.344568	0.00828014	0.993393	0.999327	187.778	0.0436155	0.180265	0.241953	0.808817	0.957977
ENSSSCG00000000774	USP18	401.887	0.714763	0.297	2.40661	0.0161014	0.101422	377.694	1.42257	0.31668	4.49215	7.05078e-06	0.00175144	453.829	0.974693	0.610537	1.59645	0.110388	0.744567	413.759	1.16367	0.360432	3.22855	0.00124418	0.0454412
ENSSSCG00000000783	SLC2A13	34.1171	0.324173	0.216285	1.49882	0.13392	0.364699	27.6074	0.390973	0.588444	0.664419	0.506422	0.989825	37.0205	0.549745	0.508598	1.0809	0.279741	0.899985	32.0836	0.473821	0.313682	1.51052	0.130912	0.532931
ENSSSCG00000000784	LRRK2	6603.59	0.0785828	0.164251	0.47843	0.632344	0.811921	5721.29	-0.0531483	0.294261	-0.180616	0.856669	0.998795	6227.67	0.207268	0.274231	0.755814	0.449761	0.945205	5961.45	0.0684275	0.198191	0.345261	0.729898	0.934617
ENSSSCG00000000793	PPHLN1	4426.24	-0.0910391	0.0992346	-0.917413	0.358926	0.616864	4225.53	-0.238821	0.193368	-1.23506	0.216809	0.920149	4639.92	0.22037	0.221193	0.996281	0.319113	0.911283	4421.69	-0.0085182	0.137682	-0.0618685	0.950668	0.993058
ENSSSCG00000000798	TWF1	6257.15	0.304649	0.360845	0.844265	0.398521	0.65113	6081.83	0.00919536	0.161196	0.0570446	0.95451	0.998801	6291.25	-0.336834	0.281377	-1.19709	0.23127	0.873496	6180.62	-0.15741	0.149802	-1.05079	0.293353	0.70509
ENSSSCG00000000799	IRAK4	451.17	0.0388483	0.113905	0.341058	0.73306	0.871478	425.066	0.168138	0.230094	0.730737	0.46494	0.98867	456.327	-0.171566	0.225937	-0.759354	0.447641	0.944547	439.853	0.00947675	0.142679	0.0664201	0.947043	0.99279
ENSSSCG00000000800	PUS7L	305.593	-0.0147356	0.103935	-0.141778	0.887255	0.948245	320.173	0.0982388	0.210446	0.466813	0.640634	0.995655	311.856	-0.214848	0.24082	-0.892154	0.372311	0.920068	316.135	-0.0433451	0.163431	-0.26522	0.79084	0.953603
ENSSSCG00000000801	TMEM117	248.607	0.329243	0.60792	0.541589	0.588102	0.78555	234.041	-0.0402394	0.269582	-0.149266	0.881344	0.998795	278.548	-0.357507	0.413416	-0.864762	0.387169	0.923864	255.185	-0.222779	0.241643	-0.921938	0.356561	0.752682
ENSSSCG00000000804	ANO6	5899.41	0.25195	0.241224	1.04447	0.296269	0.561104	4492.34	0.0297989	0.172629	0.172618	0.862952	0.998795	6030.19	-0.31272	0.300787	-1.03967	0.298493	0.903854	5223.54	-0.157748	0.177212	-0.890165	0.373377	0.765018
ENSSSCG00000000806	SCAF11	4173.28	-0.0685334	0.108531	-0.631463	0.527738	0.746479	3382.28	-0.136692	0.183765	-0.743837	0.456975	0.98867	3954.83	-0.172721	0.229508	-0.752568	0.451709	0.945262	3653.89	-0.157789	0.127671	-1.2359	0.216496	0.64013
ENSSSCG00000000807		1311.48	-0.305395	0.089555	-3.41015	0.000649283	0.0111848	1035.88	-0.45571	0.178304	-2.5558	0.0105943	0.30279	1208.27	-0.094098	0.188865	-0.498229	0.618322	0.971288	1117.61	-0.263336	0.123484	-2.13255	0.032962	0.292256
ENSSSCG00000000808	SLC38A2	11317.3	-0.172499	0.092026	-1.87446	0.0608665	0.229213	9526.29	-0.205674	0.146585	-1.40311	0.160586	0.862648	11341.5	-0.0318659	0.231927	-0.137396	0.890718	0.991671	10386.7	-0.11492	0.142784	-0.804849	0.420907	0.794032
ENSSSCG00000000810	AMIGO2	672.864	0.43106	0.150955	2.85555	0.0042962	0.0424393	438.471	0.285079	0.322132	0.884975	0.37617	0.974844	638.895	0.600722	0.275425	2.18107	0.0291782	0.520663	533.698	0.461596	0.227095	2.03261	0.0420916	0.329807
ENSSSCG00000000811	PCED1B	2485.48	0.152448	0.165274	0.922396	0.356322	0.615087	1625.02	-0.0705846	0.216586	-0.325896	0.744503	0.995655	1882.31	0.543343	0.211655	2.56712	0.0102548	0.351766	1747.03	0.251531	0.163515	1.53828	0.123981	0.522806
ENSSSCG00000000816	SENP1	741.58	-0.0442682	0.111072	-0.398556	0.690221	0.845925	712.369	0.0430049	0.249454	0.172396	0.863126	0.998795	792.498	-0.0891725	0.218858	-0.407445	0.683682	0.979182	750.284	-0.0222486	0.141226	-0.157539	0.87482	0.976798
ENSSSCG00000000837	CHST11	2497.49	0.0614063	0.0900546	0.681879	0.495316	0.72257	1642.55	0.111055	0.198598	0.559195	0.576029	0.993215	2076.39	0.0565336	0.230629	0.245128	0.806357	0.988618	1848.58	0.0845128	0.133811	0.631586	0.527658	0.849184
ENSSSCG00000000838	SLC41A2	156.6	0.132216	0.141842	0.93213	0.351269	0.61049	152.542	0.280228	0.296453	0.94527	0.344521	0.967942	136.461	0.203557	0.28372	0.71746	0.47309	0.950793	144.857	0.219283	0.223705	0.980233	0.326971	0.732966
ENSSSCG00000000839	ALDH1L2	583.014	0.391576	0.116823	3.35188	0.000802634	0.0130659	493.802	0.54161	0.249251	2.17295	0.0297843	0.48782	597.703	0.224049	0.234807	0.954183	0.339991	0.915486	543.115	0.374845	0.156701	2.3921	0.0167524	0.205849
ENSSSCG00000000840	WASHC4	2274.91	0.165626	0.0966217	1.71417	0.086497	0.282753	2128.59	0.248915	0.203652	1.22226	0.221611	0.923093	2382.48	0.051525	0.205448	0.250794	0.801974	0.988618	2248.96	0.148941	0.119285	1.24861	0.211807	0.634337
ENSSSCG00000000841	APPL2	999.709	-0.0604033	0.115343	-0.523686	0.600497	0.793591	722.432	0.0598404	0.29098	0.205651	0.837063	0.997873	1230.69	-0.0471933	0.231503	-0.203856	0.838466	0.990719	964.061	-0.0111112	0.246149	-0.04514	0.963996	0.994712
ENSSSCG00000000842	KANSL2	1317.85	-0.248563	0.0721896	-3.4432	0.000574879	0.0103308	1042.45	-0.252631	0.16488	-1.53221	0.12547	0.810743	1399.12	-0.171815	0.209873	-0.818662	0.412979	0.930669	1211.84	-0.204036	0.143587	-1.42099	0.155319	0.568494
ENSSSCG00000000843	TXNRD1	1307.99	0.286195	0.137646	2.07921	0.0375978	0.171809	1074.89	0.0807859	0.159258	0.507266	0.611968	0.994186	1413.42	0.543619	0.333259	1.63122	0.102844	0.734257	1235.66	0.334603	0.19622	1.70525	0.088148	0.461527
ENSSSCG00000000844	NFYB	448.752	0.107679	0.109209	0.985991	0.324138	0.587455	420.023	0.13943	0.211665	0.658729	0.51007	0.990567	473.939	0.0427987	0.271542	0.157613	0.874762	0.99083	445.516	0.0912263	0.135879	0.67138	0.501979	0.838891
ENSSSCG00000000846	HCFC2	582.536	0.0183739	0.104883	0.175185	0.860934	0.935395	493.133	-0.0971703	0.197572	-0.491822	0.622845	0.99491	639.062	0.0702682	0.200635	0.350229	0.726167	0.983197	562.44	-0.0107776	0.142316	-0.0757298	0.939634	0.991567
ENSSSCG00000000847	TDG	1348.32	-0.0965707	0.103661	-0.931599	0.351544	0.610639	1243.72	-0.221876	0.223527	-0.992611	0.3209	0.965849	1401.77	-0.0574944	0.250723	-0.229315	0.818624	0.989273	1318.45	-0.146044	0.157558	-0.926923	0.353966	0.7516
ENSSSCG00000000848	GLT8D2	12.0989	-0.579049	0.360358	-1.60687	0.108083	0.32176	9.68487	-0.780242	0.800735	-0.974408	0.329854	0.967942	16.9928	-0.685463	0.772559	-0.887263	0.374937	0.920068	13.1548	-0.723729	0.460943	-1.57011	0.116391	0.512021
ENSSSCG00000000849	HSP90B1	6093.61	0.367249	0.0767073	4.78767	1.68728e-06	0.000124821	6037.97	0.361025	0.18131	1.9912	0.0464593	0.585188	6810.74	0.342002	0.229697	1.48893	0.136506	0.786617	6404.47	0.336048	0.152487	2.20378	0.0275397	0.270295
ENSSSCG00000000853	NT5DC3	351.673	-0.0136843	0.10065	-0.135959	0.891854	0.949185	290.142	-0.0539681	0.217625	-0.247987	0.804145	0.995655	319.874	0.0993934	0.251267	0.395569	0.692423	0.979182	304.211	0.0239573	0.125861	0.190347	0.849037	0.970916
ENSSSCG00000000854		68.0946	0.183531	0.372695	0.492442	0.622407	0.807306	59.5588	-0.379171	0.553449	-0.685105	0.493278	0.989825	63.6055	-0.291314	0.540875	-0.538598	0.590164	0.966821	61.4775	-0.34301	0.354651	-0.967176	0.333456	0.737508
ENSSSCG00000000859	PARPBP	889.804	0.222731	0.0935178	2.3817	0.0172328	0.105787	844.247	0.123529	0.204043	0.605409	0.544907	0.993215	1033.04	0.492102	0.263856	1.86504	0.062176	0.653425	933.896	0.313954	0.153045	2.05139	0.0402293	0.32272
ENSSSCG00000000860	NUP37	146.872	0.0742112	0.125004	0.593673	0.552731	0.763494	141.196	0.0867282	0.266511	0.32542	0.744863	0.995655	159.385	-0.138783	0.296877	-0.467476	0.640159	0.976787	149.822	-0.0278894	0.163665	-0.170405	0.864692	0.974775
ENSSSCG00000000862	GNPTAB	1775.03	-0.00857561	0.0794536	-0.107932	0.914049	0.960175	1637.7	-0.13294	0.160354	-0.829038	0.407083	0.983944	1687.2	0.109098	0.225944	0.482854	0.6292	0.974383	1660.92	-0.0152796	0.11328	-0.134884	0.892704	0.981045
ENSSSCG00000000864	CHPT1	145.42	0.745695	0.175981	4.23735	2.26174e-05	0.000923644	134.31	0.458227	0.500586	0.915382	0.359991	0.967942	161.984	0.835925	0.49833	1.67745	0.0934543	0.718625	147.454	0.624891	0.365379	1.71025	0.0872191	0.45934
ENSSSCG00000000867	SPIC	11.222	-0.309776	0.507162	-0.610802	0.541331	0.755399	9.8736	0.212354	1.13622	0.186895	0.851743	0.998795	11.8946	-0.749463	0.882883	-0.848882	0.395947	0.927123	10.8277	-0.544239	0.658202	-0.826857	0.408318	0.787028
ENSSSCG00000000869	UTP20	789.222	-0.00616036	0.090889	-0.0677789	0.945962	0.973073	751.494	0.0733809	0.223812	0.327868	0.743011	0.995655	763.436	0.00133703	0.230595	0.00579815	0.995374	0.999429	756.996	0.0355608	0.147136	0.241687	0.809023	0.957996
ENSSSCG00000000870	ARL1	367.424	0.0394476	0.118744	0.332206	0.739734	0.874329	370.282	0.15138	0.19033	0.795356	0.426407	0.983944	385.083	-0.2643	0.276141	-0.957117	0.338508	0.915468	377.217	-0.0507198	0.167967	-0.301962	0.762681	0.945576
ENSSSCG00000000874	GAS2L3	195.727	-0.0525736	0.127841	-0.411243	0.680894	0.841075	172.163	-0.0523683	0.248065	-0.211107	0.832804	0.997873	222.323	0.135979	0.314664	0.432139	0.66564	0.978874	195.98	0.0441731	0.172913	0.255464	0.798365	0.955398
ENSSSCG00000000877	SCYL2	3482.46	-0.183917	0.10492	-1.75293	0.0796144	0.268975	2730.06	-0.408615	0.196258	-2.08203	0.0373393	0.539879	3255.54	-0.0884279	0.312428	-0.283035	0.77715	0.986962	2979.68	-0.240801	0.173731	-1.38605	0.165731	0.582272
ENSSSCG00000000884	APAF1	2238.62	-0.0690241	0.0754292	-0.915084	0.360147	0.618324	1833.96	-0.147315	0.169256	-0.870368	0.384099	0.977046	2200.18	-0.0979215	0.176689	-0.554201	0.579441	0.966659	2007.74	-0.122545	0.104624	-1.17129	0.241484	0.660596
ENSSSCG00000000886	SLC25A3	4489.93	0.068784	0.0880758	0.780964	0.434824	0.678317	3808.46	-0.031674	0.155149	-0.204152	0.838235	0.997873	4109.06	0.167053	0.186406	0.896178	0.370158	0.920068	3950.41	0.0677926	0.0884172	0.766736	0.443239	0.806391
ENSSSCG00000000887		101.601	0.118716	0.207692	0.571597	0.567595	0.771458	73.0468	0.253253	0.3559	0.711584	0.476722	0.98867	117.878	-0.268773	0.820726	-0.327482	0.743303	0.983405	94.3921	-0.0770708	0.473768	-0.162676	0.870773	0.975837
ENSSSCG00000000890	NEDD1	828.498	-0.0419679	0.112032	-0.374608	0.707952	0.856627	702.546	-0.0400947	0.193917	-0.206762	0.836196	0.997873	907.278	-0.140747	0.255592	-0.550671	0.581859	0.966659	799.75	-0.0914767	0.146025	-0.626445	0.531023	0.851368
ENSSSCG00000000891	LTA4H	1085.29	-0.0825566	0.122855	-0.671984	0.501594	0.727822	1085.77	-0.147643	0.19032	-0.775764	0.437888	0.983944	1262.5	-0.375576	0.20676	-1.81648	0.0692965	0.676908	1169.5	-0.263228	0.116216	-2.26499	0.0235134	0.250111
ENSSSCG00000000895	SNRPF	802.286	-0.285394	0.107996	-2.64264	0.00822622	0.0641713	886.734	-0.160125	0.191435	-0.836447	0.402904	0.983944	1042.73	-0.412465	0.241732	-1.70629	0.0879539	0.711513	960.606	-0.289208	0.128789	-2.2456	0.0247297	0.255193
ENSSSCG00000000896	NTN4	16.3922	-0.209369	0.309815	-0.675788	0.499175	0.725895	16.7693	-0.315437	0.765285	-0.412183	0.680205	0.995655	13.5809	-0.477745	0.812478	-0.588011	0.556525	0.96456	15.246	-0.372809	0.608186	-0.612985	0.539886	0.856788
ENSSSCG00000000900	VEZT	381.239	-0.076822	0.0984602	-0.780234	0.435253	0.67853	362.659	-0.18354	0.209129	-0.877644	0.380137	0.976796	441.322	-0.14358	0.205245	-0.699553	0.484207	0.952351	399.987	-0.162625	0.108936	-1.49286	0.135475	0.53899
ENSSSCG00000000901	FGD6	48.6212	-0.159149	0.20243	-0.786195	0.431753	0.67591	40.2895	-0.0716438	0.487437	-0.146981	0.883147	0.998795	50.5374	-0.465578	0.485771	-0.958433	0.337845	0.915165	45.1458	-0.289849	0.287875	-1.00686	0.314004	0.723188
ENSSSCG00000000902	NR2C1	1334.47	0.264358	0.0874857	3.02173	0.00251338	0.0290775	1200.55	0.1609	0.171987	0.935539	0.34951	0.967942	1388.46	0.468205	0.21099	2.21909	0.0264809	0.506706	1289.71	0.321042	0.114935	2.79326	0.00521805	0.105433
ENSSSCG00000000905		1061.91	0.0952725	0.0879262	1.08355	0.278564	0.544114	1021.89	0.0853661	0.238444	0.358013	0.720333	0.995655	933.867	0.247238	0.243037	1.01729	0.309017	0.907211	979.761	0.145917	0.189889	0.768437	0.442228	0.805768
ENSSSCG00000000906	TMCC3	15.9228	-0.0969657	0.361365	-0.268332	0.788444	0.898151	13.7208	0.252439	0.706507	0.357306	0.720862	0.995655	12.8889	-0.646205	0.773964	-0.834929	0.403758	0.929509	13.3199	-0.178764	0.405973	-0.440335	0.659695	0.906555
ENSSSCG00000000907	PLXNC1	3729.14	0.265969	0.135142	1.96807	0.0490605	0.203264	2805.28	0.250953	0.214476	1.17008	0.24197	0.93476	3896.64	0.119271	0.225045	0.529985	0.596122	0.966821	3324.12	0.18648	0.174046	1.07144	0.283971	0.698343
ENSSSCG00000000908	UBE2NL	1313.84	-0.102456	0.0847102	-1.20949	0.226473	0.490356	1189.19	-0.0906787	0.159917	-0.567037	0.570689	0.993215	1375.32	-0.223551	0.216769	-1.03128	0.302408	0.90394	1277.41	-0.157861	0.0967638	-1.6314	0.102805	0.493062
ENSSSCG00000000910	CRADD	388.477	0.0791733	0.0903532	0.876264	0.380886	0.636806	341.228	0.0676489	0.191554	0.353159	0.72397	0.995655	442.595	0.0675679	0.252438	0.267662	0.78896	0.988618	389.382	0.0636675	0.137015	0.464676	0.642164	0.90275
ENSSSCG00000000920	POC1B	586.175	-0.0418994	0.0819439	-0.511318	0.609128	0.799072	522.873	-0.0992295	0.198922	-0.498835	0.617896	0.99491	611.121	-0.0406526	0.213436	-0.190468	0.848943	0.99083	564.705	-0.0637262	0.118169	-0.539281	0.589693	0.878639
ENSSSCG00000000925	C12orf29	402.503	0.0676992	0.135884	0.498212	0.618335	0.804765	342.694	0.181456	0.251507	0.721476	0.470617	0.98867	437.882	0.0221056	0.264882	0.0834545	0.93349	0.997892	387.878	0.0956276	0.163509	0.584846	0.558652	0.866591
ENSSSCG00000000926	CEP290	307.607	-0.452884	0.179858	-2.518	0.0118023	0.0827587	285.022	-0.547844	0.298076	-1.83794	0.0660718	0.667148	365.997	-0.290458	0.246843	-1.17669	0.239319	0.875654	323.454	-0.405574	0.184976	-2.19258	0.0283379	0.27377
ENSSSCG00000000927	TMTC3	705.571	-0.168659	0.0758853	-2.22255	0.0262462	0.137164	586.129	-0.204059	0.28032	-0.727952	0.466643	0.98867	730.114	-0.0688966	0.29397	-0.234366	0.814701	0.988618	654.475	-0.130777	0.190715	-0.685722	0.492889	0.834627
ENSSSCG00000000939	ACSS3	128.275	-0.860624	0.320424	-2.6859	0.00723357	0.0589257	64.5266	-0.775911	0.499924	-1.55206	0.120648	0.807849	160.32	-1.36685	0.54675	-2.49995	0.0124211	0.379555	110.035	-1.19235	0.454188	-2.62524	0.00865879	0.14314
ENSSSCG00000000941	METTL25	569.173	-0.0570173	0.146558	-0.389043	0.697245	0.849838	449.072	-0.073449	0.224467	-0.327215	0.743505	0.995655	572.298	-0.0468218	0.273479	-0.171208	0.86406	0.99083	507.647	-0.0591087	0.156744	-0.377104	0.706096	0.926253
ENSSSCG00000000943	OTOGL	15.4803	-0.123648	0.412095	-0.300049	0.76414	0.88678	16.9082	-0.312947	0.832934	-0.375717	0.707128	0.995655	17.4107	0.604003	0.831434	0.726459	0.467558	0.948914	17.1393	-0.0383127	0.570135	-0.0671994	0.946423	0.992578
ENSSSCG00000000950	E2F7	262.586	-0.420934	0.219748	-1.91553	0.0554247	0.217197	217.403	-0.115665	0.32855	-0.352046	0.724804	0.995655	245.89	-1.07825	0.550248	-1.95957	0.0500463	0.616463	230.808	-0.610275	0.344672	-1.7706	0.076628	0.433914
ENSSSCG00000000952	ZDHHC17	824.205	-0.131394	0.120551	-1.08995	0.275736	0.541752	641.086	-0.0647288	0.198611	-0.325907	0.744494	0.995655	843.713	-0.261098	0.232765	-1.12172	0.26198	0.892386	737.317	-0.171025	0.143916	-1.18837	0.234688	0.654437
ENSSSCG00000000955	TBC1D22A	934.032	0.227334	0.0919938	2.47119	0.0134665	0.0902951	908.502	0.192177	0.174354	1.10223	0.270363	0.952738	897.97	0.240441	0.192338	1.2501	0.211264	0.851901	903.277	0.214315	0.102218	2.09664	0.0360255	0.306126
ENSSSCG00000000958	DYRK2	3954.63	-0.0486523	0.0994194	-0.489364	0.624584	0.808477	3157.26	0.0472959	0.228894	0.206628	0.836301	0.997873	3595.76	-0.233791	0.24851	-0.94077	0.346823	0.918822	3365	-0.0972037	0.157996	-0.615229	0.538403	0.856375
ENSSSCG00000000959	LARGE1	90.31	0.238671	0.300215	0.795	0.426613	0.672245	68.883	0.417313	1.74859	0.238656	0.811372	0.996517	182.132	0.459455	1.30651	0.351665	0.725089	0.983197	122.776	0.103139	1.25099	0.0824459	0.934292	0.991029
ENSSSCG00000000964	LMF2	516.317	0.157986	0.132937	1.18843	0.234664	0.499172	500.783	0.11659	0.254273	0.458524	0.646576	0.995655	518.739	0.285269	0.25658	1.11181	0.26622	0.894734	509.153	0.198937	0.156093	1.27448	0.202494	0.62538
ENSSSCG00000000965	NCAPH2	703.771	-0.0561976	0.13151	-0.427325	0.669142	0.834063	702.508	-0.0476945	0.244012	-0.195459	0.845033	0.997873	718.22	-0.157602	0.261696	-0.602231	0.54702	0.96456	709.71	-0.106138	0.163752	-0.648167	0.516877	0.844972
ENSSSCG00000000968	SBF1	5851.98	0.124172	0.0968413	1.28222	0.199767	0.45651	5038.47	0.0456677	0.140696	0.324583	0.745496	0.995655	4735.86	0.3119	0.176919	1.76295	0.0779085	0.691546	4893.39	0.167029	0.122126	1.36768	0.171411	0.590671
ENSSSCG00000000970	PPP6R2	2201.21	0.0581167	0.0897068	0.647852	0.517081	0.738861	2125.6	0.0597864	0.150116	0.398267	0.690433	0.995655	2008.72	0.255696	0.174621	1.46429	0.143115	0.794335	2069.54	0.153007	0.109216	1.40097	0.161224	0.577607
ENSSSCG00000000971	HDAC10	568.344	-0.0297171	0.120753	-0.246099	0.805606	0.907262	562.191	0.160806	0.240834	0.667708	0.50432	0.989825	518.662	-0.110809	0.28206	-0.392855	0.694427	0.979182	541.274	0.039664	0.176608	0.224588	0.8223	0.963329
ENSSSCG00000000972	TUBGCP6	917.79	-0.0477392	0.0964018	-0.495211	0.620451	0.806121	837.006	0.1418	0.178364	0.795006	0.42661	0.983944	824.075	-0.135895	0.256002	-0.530837	0.595532	0.966821	830.601	0.0116929	0.135785	0.0861137	0.931376	0.989738
ENSSSCG00000000973	SELENOO	549.665	0.216994	0.173866	1.24805	0.212012	0.473295	582.768	-0.12799	0.259844	-0.492566	0.622319	0.99491	554.776	-0.0656104	0.248232	-0.264311	0.791541	0.988618	569.347	-0.0979787	0.177473	-0.552077	0.580895	0.875207
ENSSSCG00000000974	TRABD	407.035	0.260556	0.127714	2.04016	0.0413348	0.182591	451.155	0.189727	0.202751	0.93576	0.349397	0.967942	376.298	0.598063	0.232723	2.56984	0.0101744	0.351766	415.466	0.366713	0.179954	2.03781	0.0415685	0.327231
ENSSSCG00000000980	ALG12	306.232	0.275372	0.121394	2.26842	0.0233038	0.128123	244.899	0.357749	0.239546	1.49345	0.13532	0.831586	264.704	0.353586	0.253434	1.39518	0.162962	0.811098	254.275	0.352875	0.144189	2.44732	0.0143924	0.190163
ENSSSCG00000000981	CRELD2	238.7	0.562998	0.14374	3.91677	8.97418e-05	0.00258658	257.356	0.696832	0.275176	2.53231	0.0113313	0.308807	223.971	0.663736	0.389199	1.70539	0.0881214	0.711529	241.421	0.676097	0.241977	2.79405	0.0052052	0.105331
ENSSSCG00000000985	EXOC2	7148.77	-0.100033	0.0673511	-1.48525	0.137478	0.370504	6658.56	-0.05422	0.143653	-0.377438	0.705848	0.995655	6595.7	-0.0049838	0.204843	-0.0243298	0.98059	0.998768	6626.95	-0.0281341	0.113128	-0.248692	0.803599	0.957029
ENSSSCG00000000994	GMDS	509.886	0.0981946	0.129544	0.758001	0.44845	0.68773	483.38	0.193876	0.274425	0.706482	0.479888	0.98867	476.918	0.0899901	0.201361	0.446909	0.654941	0.977132	480.163	0.151513	0.157276	0.96336	0.335367	0.738632
ENSSSCG00000000998	RPP40	238.856	-0.0343315	0.117422	-0.292376	0.769999	0.889272	185.386	0.00412827	0.300672	0.0137302	0.989045	0.999052	219.461	0.080802	0.242622	0.333036	0.739107	0.983405	201.551	0.0437597	0.155939	0.280621	0.779001	0.948666
ENSSSCG00000000999	CDYL	753.887	0.292564	0.154615	1.89222	0.0584622	0.224291	754.673	0.188341	0.177262	1.0625	0.288009	0.96026	866.983	0.7755	0.226026	3.43102	0.000601314	0.0921788	808.021	0.480087	0.162783	2.94925	0.00318546	0.0789162
ENSSSCG00000001000	ECI2	120.279	0.34106	0.199467	1.70985	0.0872929	0.284342	152.062	0.546348	0.359869	1.51819	0.128967	0.819873	110.779	-0.133839	0.415617	-0.322024	0.747434	0.983832	132.398	0.271774	0.301298	0.90201	0.367052	0.759924
ENSSSCG00000001002	PRPF4B	3892.97	-0.325184	0.0767538	-4.23671	2.26819e-05	0.000923644	3298.24	-0.158405	0.155987	-1.0155	0.309869	0.960992	3767	-0.375966	0.234509	-1.6032	0.10889	0.741756	3520.17	-0.270412	0.116219	-2.32676	0.0199781	0.227018
ENSSSCG00000001004	SLC22A23	1282.26	0.290034	0.119949	2.41798	0.0156068	0.0993881	1082.82	-0.0113676	0.217015	-0.0523814	0.958225	0.998818	1219	0.477163	0.349212	1.3664	0.171814	0.81901	1147.44	0.235082	0.198716	1.18301	0.236806	0.656156
ENSSSCG00000001008	BPHL	456.079	-0.00995096	0.0853821	-0.116546	0.90722	0.957027	428.888	0.0159503	0.19838	0.080403	0.935917	0.998795	445.149	0.0687346	0.242117	0.28389	0.776495	0.986962	436.517	0.0461404	0.118734	0.388602	0.697571	0.923646
ENSSSCG00000001009	RIPK1	2805.69	0.0454134	0.0816303	0.556329	0.577986	0.779526	2483.94	0.0960316	0.145796	0.658673	0.510106	0.990567	2496.21	0.186152	0.210048	0.886237	0.37549	0.920068	2489.21	0.139613	0.104012	1.34228	0.179507	0.599409
ENSSSCG00000001010	WRNIP1	1249.66	0.0920934	0.0955209	0.964118	0.334987	0.596659	1187.28	0.127048	0.186648	0.680681	0.496073	0.989825	1151.55	0.0573465	0.196103	0.292431	0.769957	0.986962	1169.95	0.095272	0.114529	0.831859	0.405488	0.785329
ENSSSCG00000001011	SERPINB1	7560.95	0.264408	0.140118	1.88704	0.0591553	0.22577	6000.66	-0.0267187	0.18477	-0.144605	0.885023	0.998795	7312.28	0.257116	0.270004	0.952269	0.34096	0.915486	6623.53	0.122209	0.150566	0.811666	0.416983	0.791393
ENSSSCG00000001021		231.414	-0.226062	0.136962	-1.65054	0.0988324	0.304989	159.652	-0.237115	0.321041	-0.73858	0.460162	0.98867	139.25	-0.142246	0.277869	-0.511917	0.608709	0.967921	149.904	-0.188548	0.195864	-0.962651	0.335723	0.738632
ENSSSCG00000001022	SSR1	2729.47	-0.020264	0.0687993	-0.294538	0.768347	0.88852	1994.21	0.00324351	0.228505	0.0141945	0.988675	0.999052	2250.04	0.0140466	0.18861	0.0744741	0.940633	0.998416	2115.43	0.00987592	0.125084	0.078954	0.937069	0.991029
ENSSSCG00000001024	RIOK1	647.137	-0.165586	0.08684	-1.9068	0.0565468	0.219611	563.798	-0.0457824	0.183719	-0.249199	0.803207	0.995655	619.111	-0.134206	0.231621	-0.57942	0.562306	0.964586	589.944	-0.0826025	0.143867	-0.574158	0.565861	0.869369
ENSSSCG00000001033	SLC35B3	353.367	0.220668	0.129206	1.70787	0.0876599	0.284789	287.297	0.286222	0.230765	1.24032	0.214857	0.91771	348.479	-0.00106123	0.266049	-0.00398887	0.996817	0.999429	316.322	0.125903	0.150959	0.83402	0.40427	0.784339
ENSSSCG00000001038		3416.73	0.168867	0.103971	1.62417	0.10434	0.315126	3227.74	0.0478428	0.22543	0.212229	0.831929	0.997841	3347.33	0.427725	0.315568	1.35542	0.175285	0.821911	3284.04	0.218087	0.211727	1.03004	0.302993	0.713637
ENSSSCG00000001041	PAK1IP1	449.507	-0.219503	0.080263	-2.7348	0.00624179	0.0537643	479.132	-0.0825084	0.182293	-0.452613	0.650827	0.995655	525.704	-0.266086	0.221639	-1.20054	0.229932	0.872333	501.164	-0.175757	0.101868	-1.72533	0.0844674	0.4524
ENSSSCG00000001045	ELOVL2	10.3433	-0.171445	0.395465	-0.433528	0.664631	0.83054	5.12793	-0.440592	1.23554	-0.356598	0.721393	NA	15.2527	-0.310533	0.671692	-0.462315	0.643855	0.976787	9.94398	-0.461899	0.633772	-0.72881	0.466118	0.819646
ENSSSCG00000001049	HIVEP1	1470.87	0.0160738	0.143248	0.112209	0.910657	0.958792	927.655	0.000242789	0.264309	0.000918581	0.999267	0.999723	1027.88	0.160198	0.293333	0.546131	0.584976	0.966821	975.155	0.0856499	0.182375	0.469636	0.638615	0.901994
ENSSSCG00000001052	PHACTR1	6157.82	0.09604	0.183188	0.524269	0.600092	0.793527	4808.62	-0.0200316	0.180824	-0.110779	0.911791	0.998795	5437.56	0.387191	0.329387	1.17549	0.239799	0.875654	5106.75	0.177103	0.197763	0.895533	0.370502	0.762581
ENSSSCG00000001053	TBC1D7	217.844	-0.150248	0.126642	-1.1864	0.235464	0.500086	185.028	-0.279629	0.266147	-1.05066	0.293415	0.960992	185.217	0.0866035	0.279931	0.309375	0.757036	0.984862	185.062	-0.104974	0.160042	-0.655917	0.511878	0.843973
ENSSSCG00000001056	RANBP9	2741.81	-0.0945108	0.0851453	-1.10999	0.267002	0.532723	2205.99	-0.137181	0.172957	-0.793151	0.42769	0.983944	2643.65	0.0704725	0.171691	0.410461	0.681468	0.979182	2413.67	-0.0325234	0.112994	-0.287833	0.773475	0.947992
ENSSSCG00000001057	MCUR1	738.284	-0.386148	0.0826055	-4.67461	2.94512e-06	0.000186749	578.936	-0.384653	0.183732	-2.09356	0.0362996	0.533422	653.736	-0.216768	0.242679	-0.893231	0.371733	0.920068	614.339	-0.29377	0.153617	-1.91236	0.0558302	0.375274
ENSSSCG00000001061	JARID2	3700.82	-0.24175	0.115207	-2.09839	0.0358707	0.166895	3096.84	-0.349606	0.181454	-1.92669	0.0540184	0.620705	3167.8	0.0391342	0.192505	0.20329	0.838909	0.990806	3129.89	-0.161223	0.124075	-1.2994	0.193807	0.61611
ENSSSCG00000001062	DTNBP1	294.244	0.105964	0.102467	1.03413	0.301075	0.565381	289.148	0.388937	0.200212	1.94263	0.0520614	0.60918	313.5	-0.00414792	0.216445	-0.0191639	0.98471	0.998768	300.671	0.190309	0.113614	1.67505	0.0939248	0.476591
ENSSSCG00000001063	MYLIP	2376.09	0.0839783	0.125671	0.668241	0.50398	0.729464	1840.68	0.176969	0.289675	0.610924	0.54125	0.993215	2256.26	0.088746	0.360569	0.246127	0.805584	0.988618	2037.96	0.134358	0.22627	0.593796	0.552648	0.862835
ENSSSCG00000001064		2750.11	0.188281	0.229804	0.819313	0.412608	0.660847	2973.08	-0.0153639	0.204986	-0.0749512	0.940254	0.998795	3023.77	-0.347399	0.293287	-1.1845	0.236215	0.875585	2996.79	-0.195539	0.192127	-1.01776	0.308792	0.719874
ENSSSCG00000001065	ATXN1	412.019	0.375948	0.172356	2.18123	0.0291663	0.146481	282.697	0.13206	0.276317	0.477928	0.632701	0.995655	338.509	0.483257	0.359252	1.34518	0.178568	0.826308	309.223	0.29693	0.213401	1.39142	0.164099	0.580386
ENSSSCG00000001070	FAM8A1	328.102	-0.44428	0.121778	-3.64829	0.000263987	0.00583929	251.167	-0.603422	0.229411	-2.63031	0.00853081	0.26888	336.455	-0.30272	0.315432	-0.959701	0.337206	0.914536	291.653	-0.434215	0.188416	-2.30455	0.0211917	0.233334
ENSSSCG00000001073	TPMT	226.4	1.33354	0.22067	6.04315	1.51139e-09	4.79181e-07	182.215	0.761514	0.234477	3.24771	0.00116337	0.0713357	336.767	1.79071	0.518244	3.45534	0.000549591	0.0852182	255.736	1.32908	0.331278	4.01198	6.02107e-05	0.00583784
ENSSSCG00000001074	KDM1B	1496.9	0.231175	0.0910139	2.53999	0.0110855	0.0790648	1351.71	0.0421255	0.152582	0.276085	0.782483	0.995655	1521.39	0.384601	0.215806	1.78216	0.0747229	0.685145	1432.21	0.216611	0.108666	1.99336	0.0462218	0.344939
ENSSSCG00000001075	DEK	20900.2	0.432718	0.115396	3.74986	0.000176932	0.00435495	22210.4	0.429337	0.26592	1.61453	0.106411	0.779926	25495	0.703728	0.270216	2.60432	0.00920566	0.338377	23768.9	0.565415	0.185199	3.05301	0.00226558	0.0641454
ENSSSCG00000001076	RNF144B	253.704	0.426974	0.24302	1.75695	0.0789261	0.267493	220.607	0.725436	0.28637	2.53321	0.0113022	0.308636	204.247	0.508871	0.511705	0.994461	0.319998	0.911283	212.762	0.627955	0.282234	2.22494	0.026085	0.263134
ENSSSCG00000001078	MBOAT1	4420.42	0.332128	0.135886	2.44416	0.014519	0.0948214	3977.46	0.266976	0.161268	1.65548	0.097827	0.761065	4359.28	0.707588	0.289616	2.4432	0.0145578	0.401605	4158.47	0.482975	0.165543	2.91753	0.00352818	0.0840093
ENSSSCG00000001080	CDKAL1	832.478	-0.156739	0.0951284	-1.64766	0.099423	0.305966	734.106	-0.243685	0.198743	-1.22613	0.220151	0.922308	820.04	-0.117411	0.199355	-0.588956	0.555891	0.96456	774.808	-0.179248	0.107592	-1.666	0.0957135	0.480289
ENSSSCG00000001087	MRS2	547.282	0.0546291	0.105208	0.519247	0.603589	0.795702	452.235	-0.137139	0.195003	-0.703268	0.481889	0.98867	576.244	0.163039	0.213978	0.761941	0.446095	0.94386	511.119	0.0232513	0.127634	0.182171	0.855449	0.972127
ENSSSCG00000001090	ALDH5A1	267.999	-0.0374525	0.124582	-0.300626	0.7637	0.886456	210.442	0.0915194	0.475148	0.192612	0.847262	0.998477	237.018	-0.046343	0.289837	-0.159893	0.872965	0.99083	223.035	0.0373568	0.346208	0.107903	0.914073	0.986306
ENSSSCG00000001092	TDP2	663.695	-0.40604	0.117152	-3.46591	0.000528432	0.00966566	556.583	-0.707393	0.184006	-3.84439	0.000120851	0.0149567	621.44	-0.0781632	0.244035	-0.320295	0.748745	0.983832	587.272	-0.383244	0.159435	-2.40377	0.016227	0.202152
ENSSSCG00000001095	GMNN	630.087	-0.356093	0.127387	-2.79535	0.00518429	0.0473693	534.752	-0.400906	0.217253	-1.84534	0.0649882	0.667148	678.436	-0.315447	0.318129	-0.991568	0.321408	0.911283	602.862	-0.385742	0.200651	-1.92245	0.0545486	0.37204
ENSSSCG00000001096	ARMH2	80.7204	0.350265	0.296521	1.18125	0.237504	0.502453	56.1175	0.0549071	0.56906	0.0964875	0.923133	0.998795	65.7014	0.988582	0.661008	1.49557	0.134766	0.781276	60.6678	0.65082	0.442609	1.47042	0.141449	0.547159
ENSSSCG00000001097		22531	0.241936	0.0979646	2.46963	0.0135254	0.0904216	20747.1	0.226119	0.140482	1.6096	0.107486	0.783602	20991.3	0.149981	0.243128	0.616881	0.537313	0.962346	20859.5	0.190342	0.115381	1.64969	0.0990071	0.487721
ENSSSCG00000001098		100.703	0.457753	0.263054	1.74015	0.0818325	0.273583	84.4246	0.132314	0.44721	0.295864	0.767334	0.995655	62.3334	1.3111	0.584867	2.2417	0.0249807	0.495146	73.8992	0.513582	0.410471	1.2512	0.210861	0.633639
ENSSSCG00000001099	CMAH	1566.03	0.202928	0.12565	1.61503	0.106305	0.318317	1438.55	0.314853	0.15181	2.07399	0.0380804	0.545874	1652.24	0.195456	0.2892	0.675849	0.499136	0.95618	1540.04	0.254367	0.137606	1.84851	0.0645284	0.403291
ENSSSCG00000001100	CARMIL1	125.995	0.139522	0.358914	0.388735	0.697472	0.849932	99.7021	-0.275497	0.324273	-0.849585	0.395556	0.98314	156.466	-0.647253	0.428811	-1.50942	0.131193	0.775246	126.708	-0.502281	0.277634	-1.80915	0.0704282	0.417581
ENSSSCG00000001131	BTN2A2	232.714	-0.196925	0.138358	-1.4233	0.154649	0.396153	206.578	-0.055239	0.29583	-0.186726	0.851876	0.998795	220.476	-0.0223844	0.255113	-0.0877429	0.930081	0.997528	213.135	-0.0310844	0.169589	-0.183293	0.854568	0.971925
ENSSSCG00000001132	BTN1A1	93.2479	0.180933	0.25446	0.711047	0.477055	0.710766	67.9553	0.122639	0.536866	0.228436	0.819307	0.99681	61.0436	0.437869	0.71365	0.613563	0.539504	0.962593	64.6559	0.18075	0.494437	0.365566	0.714689	0.930076
ENSSSCG00000001137	HIST1H1D	13800.1	-0.135306	0.190678	-0.709602	0.477951	0.711185	13423.3	-0.0212581	0.251623	-0.0844841	0.932672	0.998795	17075.2	0.302769	0.302939	0.999438	0.317583	0.911283	15155	0.164487	0.209213	0.786218	0.43174	0.801454
ENSSSCG00000001156	ZNF322	227.542	0.355102	0.144993	2.44909	0.0143217	0.0940376	184.074	0.583575	0.244219	2.38956	0.0168687	0.376107	219.305	0.31257	0.30275	1.03244	0.301867	0.903854	200.809	0.438161	0.159042	2.755	0.00586922	0.111608
ENSSSCG00000001164	ZNF184	401.338	-0.111018	0.0890301	-1.24697	0.21241	0.473698	384.312	-0.101961	0.184617	-0.552285	0.580753	0.993215	461.43	-0.191611	0.268641	-0.71326	0.475685	0.951562	420.856	-0.150949	0.135994	-1.10997	0.267012	0.683091
ENSSSCG00000001197	ZNF165	12.4557	-0.487153	0.368696	-1.32129	0.186406	0.440884	12.1143	-0.189452	0.764043	-0.24796	0.804165	0.995655	16.4954	-0.441111	0.890278	-0.495476	0.620264	0.97183	14.198	-0.325913	0.486169	-0.670371	0.502622	0.839177
ENSSSCG00000001201	ZKSCAN8	207.271	-0.212668	0.157344	-1.35161	0.176499	0.426911	142.118	-0.172984	0.307218	-0.563065	0.573391	0.993215	154.874	-0.530699	0.381284	-1.39187	0.163961	0.811173	148.143	-0.341123	0.204843	-1.66529	0.0958548	0.480601
ENSSSCG00000001202		234.603	0.0661817	0.108856	0.607973	0.543205	0.75679	223.706	-0.0761653	0.221308	-0.34416	0.730726	0.995655	231.04	0.0485677	0.2694	0.180281	0.856932	0.99083	227.139	-0.0128577	0.126762	-0.101432	0.919208	0.987574
ENSSSCG00000001204	ZKSCAN4	12.6645	-0.369244	0.486811	-0.758496	0.448154	0.687673	12.3303	0.601929	0.902209	0.667173	0.504662	0.989825	12.9279	-0.936618	0.90655	-1.03317	0.301526	0.903854	12.6131	-0.220914	0.567255	-0.389444	0.696948	0.923646
ENSSSCG00000001205	NKAPL	9.46634	0.288147	0.549104	0.524757	0.599752	NA	9.67389	0.664046	1.06152	0.625561	0.531603	0.993041	11.6033	0.258774	1.03386	0.2503	0.802355	0.988618	10.5833	0.422002	0.641399	0.657939	0.510577	0.843973
ENSSSCG00000001206	ZSCAN26	177.356	-0.251185	0.162589	-1.5449	0.12237	0.34655	160.72	0.0136053	0.289988	0.0469169	0.962579	0.998818	195.98	-0.540507	0.384245	-1.40667	0.159524	0.810357	177.417	-0.291348	0.228103	-1.27727	0.201508	0.624024
ENSSSCG00000001207	PGBD1	46.1422	-0.171561	0.200605	-0.855218	0.39243	0.646173	27.8548	-0.337435	0.611416	-0.551891	0.581023	0.993215	47.1883	-0.329977	0.427601	-0.771694	0.440296	0.942472	37.042	-0.351917	0.365197	-0.963637	0.335228	0.738576
ENSSSCG00000001209	ZSCAN12	363.87	-0.2958	0.128463	-2.30261	0.021301	0.121736	311.376	-0.306352	0.247638	-1.2371	0.216051	0.919471	370.371	-0.433223	0.268844	-1.61143	0.107087	0.73981	339.319	-0.372246	0.149076	-2.49702	0.0125241	0.176187
ENSSSCG00000001219	TRIM27	563.46	0.202238	0.105086	1.9245	0.0542915	0.214715	503.091	0.149707	0.223178	0.670797	0.50235	0.989825	573.589	0.0997013	0.259791	0.383775	0.701145	0.980252	536.481	0.126279	0.148886	0.848162	0.396348	0.77971
ENSSSCG00000001229		36466.7	0.283659	0.0807811	3.51145	0.000445669	0.00864647	36198	0.365948	0.156709	2.3352	0.0195331	0.405684	37812.3	0.291045	0.281643	1.03338	0.301425	0.903854	36960.8	0.336829	0.169564	1.98644	0.0469845	0.348684
ENSSSCG00000001232		21.8216	-0.364402	0.336525	-1.08284	0.278881	0.544114	24.5347	-1.12237	0.570903	-1.96595	0.049304	0.599272	24.5881	-0.0228827	0.656744	-0.0348426	0.972205	0.998768	24.5559	-0.569335	0.38773	-1.46838	0.142	0.548507
ENSSSCG00000001233	TRIM26	2806.47	0.441196	0.10875	4.05699	4.97095e-05	0.00164789	2540.08	0.436312	0.177022	2.46473	0.0137117	0.341905	2673.68	0.593682	0.28307	2.09729	0.0359675	0.554644	2603.06	0.512044	0.144108	3.5532	0.000380571	0.0219383
ENSSSCG00000001234	TRIM10	3352.89	-0.140923	0.180759	-0.779617	0.435617	0.67853	3512.5	-0.0715313	0.319809	-0.223669	0.823015	0.99681	3501.42	0.464596	0.524083	0.886493	0.375352	0.920068	3506.49	0.178246	0.322656	0.552435	0.58065	0.875033
ENSSSCG00000001235	TRIM15	30.2697	0.122159	0.245924	0.496734	0.619377	0.80551	32.3838	-0.40925	0.497389	-0.822796	0.410624	0.983944	30.3561	0.518244	0.614426	0.84346	0.398971	0.928571	31.4156	-0.0251372	0.379666	-0.0662087	0.947212	0.992812
ENSSSCG00000001242	GABBR1	1711	-0.312091	0.0815373	-3.82759	0.000129404	0.00341217	1285.11	-0.257261	0.162943	-1.57884	0.114373	0.796772	1285.1	-0.204447	0.207576	-0.98493	0.324659	0.911283	1284.79	-0.227868	0.099199	-2.29709	0.0216139	0.236314
ENSSSCG00000001245	ZNRD1	195.387	-0.0735277	0.131359	-0.559748	0.575651	0.777973	208.141	0.223171	0.232438	0.960133	0.336988	0.967942	213.732	-0.243214	0.29213	-0.832554	0.405096	0.930012	210.744	-0.00121154	0.155987	-0.00776698	0.993803	0.998843
ENSSSCG00000001247	ZFP57	57.4905	0.0264748	0.194364	0.136212	0.891654	0.949185	44.0771	0.341502	0.624117	0.547176	0.584258	0.993215	56.6965	-0.344342	0.442327	-0.778477	0.436288	0.942458	50.0675	-0.031001	0.358662	-0.086435	0.931121	0.989738
ENSSSCG00000001252	UBD	2502.09	0.556213	0.174765	3.18263	0.00145944	0.0198711	3658.54	0.788347	0.604736	1.30362	0.192363	0.901207	2227.65	0.0578928	0.486825	0.118919	0.905339	0.993875	2977.38	0.554363	0.557627	0.994146	0.320152	0.728101
ENSSSCG00000001341		29816.8	0.354249	0.0980831	3.61172	0.000304168	0.00644952	28625.9	0.370835	0.166433	2.22813	0.025872	0.456227	35196.6	0.129556	0.262319	0.493887	0.621386	0.972049	31747.1	0.235616	0.152991	1.54006	0.123545	0.5219
ENSSSCG00000001342	TRIM39	289.038	-0.0209444	0.117398	-0.178405	0.858405	0.934064	257.631	-0.0671817	0.204804	-0.328029	0.74289	0.995655	300.5	0.206694	0.297891	0.693858	0.487772	0.953818	277.959	0.0651157	0.147289	0.442094	0.658421	0.90634
ENSSSCG00000001346	ABCF1	1064.82	0.146859	0.105622	1.39042	0.164401	0.410207	1026.98	0.186666	0.211029	0.884552	0.376398	0.974844	1049.82	0.120289	0.227387	0.529007	0.596801	0.966821	1037.52	0.154454	0.127912	1.2075	0.22724	0.647075
ENSSSCG00000001347	PPP1R10	4432.49	-0.366613	0.120722	-3.03685	0.00239068	0.0281719	3372.18	-0.277457	0.166711	-1.6643	0.0960534	0.754666	3870.9	-0.123752	0.210137	-0.58891	0.555922	0.96456	3608.52	-0.199182	0.108399	-1.83748	0.0661385	0.407932
ENSSSCG00000001362	MDC1	774.022	-0.11659	0.0874945	-1.33254	0.182684	0.436268	503.919	-0.21975	0.326812	-0.672403	0.501327	0.989825	579.701	0.0291083	0.34751	0.0837627	0.933245	0.997819	539.863	-0.0817908	0.232681	-0.351514	0.725203	0.933341
ENSSSCG00000001372	GNL1	703.034	-0.148583	0.123886	-1.19935	0.230391	0.494124	598.026	-0.365683	0.234065	-1.56232	0.118214	0.802549	648.626	0.0488243	0.267081	0.182807	0.85495	0.99083	621.92	-0.162675	0.167362	-0.971995	0.331053	0.735742
ENSSSCG00000001376	DHX16	555.695	0.00760544	0.0921777	0.0825085	0.934242	0.968405	556.123	0.133282	0.176136	0.756703	0.449228	0.988535	573.281	-0.0978493	0.235033	-0.416322	0.677175	0.979182	564.169	0.0258046	0.115778	0.222879	0.823629	0.963797
ENSSSCG00000001379	TUBB	10452.9	-0.202073	0.1502	-1.34536	0.178508	0.430069	9647.49	-0.0185362	0.278731	-0.0665021	0.946978	0.998795	10240.7	-0.672701	0.342813	-1.9623	0.049728	0.614877	9925.06	-0.333771	0.230463	-1.44826	0.147544	0.556105
ENSSSCG00000001382	DDR1	21.2852	0.106203	0.313054	0.339247	0.734424	0.87224	16.3264	0.890705	0.764376	1.16527	0.24391	0.937534	19.5181	-0.14861	0.630139	-0.235836	0.81356	0.988618	17.8374	0.339963	0.413273	0.822612	0.410728	0.787849
ENSSSCG00000001384	VARS2	886.958	0.12888	0.109772	1.17406	0.24037	0.505578	846.445	0.0960655	0.188036	0.510889	0.609428	0.994088	840.352	0.0391939	0.248815	0.157522	0.874834	0.99083	843.374	0.0634332	0.132262	0.479601	0.631511	0.899422
ENSSSCG00000001391	CCHCR1	36.4273	0.138542	0.255679	0.541858	0.587916	0.785461	37.6235	0.180944	0.561886	0.32203	0.74743	0.995655	45.9598	-0.136994	0.4486	-0.305382	0.760075	0.985148	41.5769	0.0149439	0.301041	0.0496409	0.960409	0.99439
ENSSSCG00000001392	TCF19	131.722	-0.0752253	0.157307	-0.478208	0.632502	0.811942	137.046	0.190084	0.296407	0.641293	0.521332	0.993041	142.563	-0.477998	0.352757	-1.35504	0.175406	0.821911	139.62	-0.139084	0.212768	-0.653689	0.513312	0.844478
ENSSSCG00000001394		135.179	0.570733	0.17839	3.19935	0.00137738	0.0190064	162.691	0.743249	0.302819	2.45444	0.0141106	0.34602	158.016	0.813673	0.389144	2.09093	0.0365341	0.556814	160.425	0.783639	0.224211	3.49509	0.000473898	0.0243478
ENSSSCG00000001395		56.5962	0.484839	0.21611	2.24348	0.024866	0.132456	47.5728	0.400283	0.393857	1.01632	0.309479	0.960992	78.8804	0.690728	0.467157	1.47858	0.139254	0.789927	62.467	0.570798	0.291839	1.95586	0.0504811	0.359579
ENSSSCG00000001396		3081.19	0.257206	0.0849279	3.02852	0.00245751	0.0286781	3253.02	0.315288	0.160648	1.96261	0.0496916	0.601201	2878.36	0.252331	0.213306	1.18296	0.236826	0.875585	3074.24	0.287405	0.137867	2.08465	0.0371008	0.309794
ENSSSCG00000001398		2728.47	0.343904	0.104829	3.28061	0.00103581	0.0155278	2182.87	0.421166	0.231613	1.8184	0.0690025	0.67963	2151.13	0.342705	0.205526	1.66746	0.0954239	0.718673	2167.33	0.38493	0.141883	2.71301	0.00666748	0.121429
ENSSSCG00000001400	DDX39B	9029.65	-0.211064	0.0736992	-2.86386	0.00418511	0.0417133	7140.2	-0.139354	0.162178	-0.859268	0.390193	0.981668	7501.93	-0.264772	0.270878	-0.977457	0.328343	0.91265	7310.07	-0.197364	0.141302	-1.39676	0.162487	0.579169
ENSSSCG00000001401	ATP6V1G2-DDX39B	23.6207	-0.807309	0.270357	-2.98609	0.00282573	0.0313823	20.053	-0.733236	0.622579	-1.17774	0.2389	0.932254	20.1631	-0.529695	0.625068	-0.847419	0.396762	0.927551	20.1013	-0.612398	0.319432	-1.91714	0.0552196	0.374343
ENSSSCG00000001402	NFKBIL1	341.075	0.0324486	0.114859	0.282509	0.777553	0.892653	370.928	-0.0750051	0.243152	-0.308469	0.757725	0.995655	361.033	0.0462319	0.293078	0.157746	0.874657	0.99083	366.134	-0.0166716	0.165824	-0.100538	0.919917	0.988022
ENSSSCG00000001404	TNF	1478.77	-0.395728	0.3917	-1.01028	0.31236	0.577212	1637.87	0.475484	0.338326	1.4054	0.159902	0.86111	1352.57	-0.597125	0.552462	-1.08084	0.279767	0.899985	1501.98	0.0899351	0.37533	0.239616	0.810628	0.958405
ENSSSCG00000001407		38.355	0.107135	0.272503	0.393152	0.694208	0.847903	35.2999	0.413532	0.442883	0.933727	0.350445	0.967942	21.5544	0.674869	0.626739	1.07679	0.281572	0.899985	28.751	0.513157	0.364133	1.40926	0.158759	0.574642
ENSSSCG00000001409	PRRC2A	6072.05	-0.0717837	0.0819237	-0.876226	0.380907	0.636806	4104.92	-0.092804	0.190931	-0.48606	0.626925	0.995552	4144.76	0.0138623	0.213839	0.0648258	0.948313	0.998416	4122.8	-0.0397613	0.11872	-0.334918	0.737687	0.937464
ENSSSCG00000001410	BAG6	8429.76	-0.0445438	0.102279	-0.435514	0.663189	0.830005	7607.22	-0.177337	0.154577	-1.14724	0.251284	0.941877	6753.11	0.121133	0.208216	0.581766	0.560725	0.96456	7198.98	-0.0364171	0.148142	-0.245826	0.805817	0.957029
ENSSSCG00000001411	APOM	88.0072	-0.502429	0.150165	-3.34584	0.000820329	0.0132406	71.2317	-0.638479	0.32802	-1.94647	0.0515988	0.608233	109.379	-0.330784	0.335944	-0.984641	0.324801	0.911283	89.3578	-0.450282	0.237963	-1.89223	0.0584603	0.385832
ENSSSCG00000001413	GPANK1	1335.35	0.103945	0.0669376	1.55286	0.120457	0.343717	1445.78	0.141539	0.152036	0.930954	0.351878	0.967942	1502.08	0.0751419	0.200315	0.375119	0.707572	0.981374	1472.18	0.109527	0.0931516	1.17579	0.239678	0.658607
ENSSSCG00000001414		1611.19	-0.0908729	0.121802	-0.746072	0.455624	0.693223	1042.79	-0.0731577	0.203494	-0.359508	0.719215	0.995655	1134.18	-0.2163	0.314594	-0.687555	0.491733	0.95501	1086	-0.143355	0.162581	-0.881742	0.377917	0.76837
ENSSSCG00000001418	NEU1	167.812	0.433269	0.148378	2.92004	0.00349985	0.0366091	143.236	0.790196	0.251343	3.1439	0.00166713	0.0910509	143.752	0.0656454	0.26997	0.243158	0.807883	0.988618	143.449	0.435423	0.165696	2.62784	0.00859293	0.142349
ENSSSCG00000001419	SLC44A4	22.4169	-0.514585	0.363112	-1.41715	0.156438	0.398711	11.5602	-0.0691281	0.867283	-0.0797065	0.936471	0.998795	18.6724	-0.510856	0.777757	-0.656832	0.511289	0.958922	14.9417	-0.314712	0.48344	-0.650984	0.515057	0.844729
ENSSSCG00000001420	EHMT2	1329.19	0.0157939	0.115933	0.136232	0.891638	0.949185	1242.5	0.202027	0.169724	1.19032	0.233919	0.929748	1276.51	-0.249739	0.300273	-0.831704	0.405576	0.93048	1258.23	-0.0121854	0.163769	-0.0744058	0.940688	0.991912
ENSSSCG00000001421	ZBTB12	56.6636	-0.06269	0.200558	-0.312578	0.754602	0.882684	53.0888	-0.468618	0.407329	-1.15047	0.249952	0.94144	75.2862	-0.0247923	0.579309	-0.0427964	0.965864	0.998768	63.6223	-0.210209	0.332632	-0.631956	0.527416	0.849184
ENSSSCG00000001422	C2	118.725	0.947331	0.197069	4.80709	1.53141e-06	0.000114563	145.283	1.33772	0.349356	3.82911	0.00012861	0.0156301	122.71	0.96266	0.709735	1.35637	0.174983	0.821718	134.526	1.17104	0.400649	2.92285	0.00346842	0.0830265
ENSSSCG00000001423	NELFE	542.722	-0.0718873	0.0879506	-0.81736	0.413723	0.661837	458.702	-0.105986	0.245243	-0.432167	0.66562	0.995655	580.184	-0.0706605	0.201957	-0.349879	0.72643	0.983197	516.369	-0.0876297	0.141049	-0.621269	0.534423	0.85315
ENSSSCG00000001424	SKIV2L	2012.49	0.0558674	0.0729587	0.765741	0.443831	0.68435	1809.19	0.090859	0.178212	0.509836	0.610166	0.994088	1810.89	0.0315076	0.198433	0.158782	0.87384	0.99083	1809.54	0.0625579	0.108328	0.577487	0.563611	0.86873
ENSSSCG00000001425	DXO	394.684	-0.122899	0.113461	-1.08318	0.278727	0.544114	333.419	-0.129521	0.248157	-0.521933	0.601717	0.994088	381.755	-0.233212	0.22486	-1.03714	0.29967	0.903854	356.333	-0.183963	0.132331	-1.39017	0.164476	0.580882
ENSSSCG00000001426	STK19	394.635	-0.138854	0.102737	-1.35154	0.176523	0.426911	402.105	-0.0957396	0.199116	-0.480824	0.630642	0.995655	413.841	0.0263462	0.230678	0.114212	0.90907	0.994191	407.566	-0.0328962	0.116881	-0.28145	0.778365	0.948666
ENSSSCG00000001427	C4A	50.3685	-0.328049	0.173635	-1.8893	0.0588513	0.225326	39.7045	-0.324793	0.455545	-0.712976	0.475861	0.98867	48.9939	-0.25483	0.400938	-0.635584	0.525048	0.959739	44.1111	-0.309005	0.241952	-1.27713	0.201556	0.624024
ENSSSCG00000001430	ATF6B	1512.71	0.052754	0.0776418	0.679454	0.49685	0.723858	1393.88	0.109927	0.165331	0.664891	0.50612	0.989825	1481.78	-0.00948447	0.229619	-0.0413052	0.967053	0.998768	1435.35	0.050396	0.107326	0.469562	0.638668	0.901994
ENSSSCG00000001431	FKBPL	91.9893	-0.418862	0.20594	-2.03391	0.041961	0.18429	96.604	-0.367063	0.361737	-1.01472	0.310238	0.960992	110.725	-0.697654	0.418948	-1.66525	0.0958625	0.719412	103.264	-0.521431	0.295458	-1.76482	0.0775935	0.435357
ENSSSCG00000001433	PPT2	263.893	0.0405152	0.111891	0.362096	0.71728	0.862342	245.395	-0.096631	0.309548	-0.312168	0.754913	0.995655	252.858	-0.0579666	0.274811	-0.210933	0.83294	0.989698	248.876	-0.0762502	0.179904	-0.423838	0.671684	0.912455
ENSSSCG00000001434	EGFL8	536.386	0.368117	0.183458	2.00654	0.0447982	0.191626	612.803	0.174711	0.218645	0.799061	0.424255	0.983944	599.412	-0.0124919	0.303147	-0.0412073	0.967131	0.998768	606.335	0.0721197	0.183871	0.392229	0.694889	0.923224
ENSSSCG00000001435	AGPAT1	1007.31	0.234426	0.209839	1.11717	0.26392	0.528793	501.527	0.177726	0.315275	0.563717	0.572946	0.993215	961.022	-0.143134	0.372711	-0.384035	0.700952	0.980185	720.094	-0.0271525	0.289496	-0.0937922	0.925274	0.988951
ENSSSCG00000001436	RNF5	552.089	-0.0156054	0.116307	-0.134174	0.893265	0.949452	600.626	0.0486465	0.2027	0.239993	0.810335	0.996517	660.9	-0.266469	0.258832	-1.0295	0.303243	0.90491	629.11	-0.110826	0.139793	-0.792785	0.427903	0.79922
ENSSSCG00000001437	AGER	238.884	0.231107	0.160753	1.43765	0.150533	0.390512	205.498	0.100523	0.339454	0.296132	0.76713	0.995655	239.273	-0.0907773	0.269734	-0.336544	0.736461	0.983405	221.515	0.0136818	0.23445	0.0583571	0.953464	0.993601
ENSSSCG00000001438	PBX2	100.091	0.0321474	0.215444	0.149215	0.881384	0.945706	83.2869	-0.185863	0.343569	-0.540976	0.588524	0.993215	106.404	-0.303269	0.401642	-0.755071	0.450206	0.945262	94.2564	-0.2392	0.258367	-0.925817	0.354541	0.751818
ENSSSCG00000001439	GPSM3	1272.98	0.246435	0.111494	2.2103	0.0270843	0.139411	936.352	0.194221	0.235274	0.825513	0.40908	0.983944	1038.81	0.216301	0.310896	0.695733	0.486596	0.952351	984.887	0.201801	0.175382	1.15064	0.249882	0.668339
ENSSSCG00000001440	NOTCH4	86.839	-0.143641	0.154279	-0.931045	0.35183	0.610977	92.9568	-0.115144	0.469441	-0.245279	0.806241	0.995897	74.2149	-0.0461874	0.429624	-0.107506	0.914387	0.994971	84.018	-0.042775	0.338308	-0.126438	0.899385	0.982496
ENSSSCG00000001453	HLA-DRA	17012.6	0.142263	0.0773213	1.83989	0.0657841	0.24039	20228.4	0.198169	0.164471	1.20489	0.228248	0.927707	16797.8	0.0927745	0.269044	0.344831	0.730222	0.983197	18592.7	0.149268	0.193884	0.769881	0.44137	0.80558
ENSSSCG00000001455		2089.35	0.25242	0.173632	1.45376	0.146012	0.383565	2995.45	0.134539	0.178695	0.752897	0.451512	0.98867	1911.56	0.329504	0.384757	0.856393	0.39178	0.926769	2479.38	0.193716	0.355693	0.544616	0.586018	0.877652
ENSSSCG00000001456		8662.78	-0.0806909	0.0779526	-1.03513	0.30061	0.564989	8870.41	-0.120061	0.138711	-0.865545	0.38674	0.979457	9661.34	-0.029358	0.209215	-0.140324	0.888404	0.991578	9244.51	-0.0766339	0.117008	-0.654943	0.512504	0.844478
ENSSSCG00000001457	SLA-DQB1	4253.65	0.0579443	0.0868295	0.667334	0.504559	0.72969	4408.25	0.0312986	0.145961	0.214431	0.830211	0.997452	4080.59	0.0465863	0.277747	0.167729	0.866796	0.99083	4251.45	0.0362216	0.158372	0.228712	0.819093	0.962249
ENSSSCG00000001458		15.9871	0.344059	0.411898	0.835301	0.403548	0.654764	9.89886	-0.70528	1.12554	-0.626616	0.530911	0.993041	22.9147	0.458817	0.673486	0.681256	0.495709	0.95501	16.0886	0.134024	0.62839	0.213282	0.831107	0.966255
ENSSSCG00000001459	HLA-DOB	796.507	0.0685206	0.0898123	0.762931	0.445505	0.685515	849.653	0.0164414	0.262663	0.062595	0.950089	0.998795	588.188	0.0647236	0.238004	0.271943	0.785666	0.988618	725.067	0.0527029	0.291469	0.180818	0.85651	0.972529
ENSSSCG00000001463	PSMB9	1470.2	0.407961	0.110821	3.68125	0.000232097	0.00529212	1841.61	0.67907	0.177741	3.82057	0.000133146	0.0158583	1491.16	0.286099	0.221908	1.28927	0.197306	0.840433	1674.53	0.511457	0.170028	3.00808	0.00262906	0.0710365
ENSSSCG00000001469	SLA-DMB	2118.99	0.174057	0.110132	1.58043	0.114007	0.33265	2559.02	0.326388	0.167765	1.94551	0.0517137	0.608233	2029.05	-0.0325554	0.356996	-0.0911925	0.92734	0.997528	2306.57	0.176099	0.226744	0.776642	0.43737	0.803824
ENSSSCG00000001470	SLA-DMA	1372.44	0.146032	0.110512	1.32141	0.186364	0.440884	1217.14	0.155551	0.221631	0.701848	0.482774	0.98867	997.919	0.0515475	0.27421	0.187985	0.850888	0.99083	1112.56	0.110628	0.188207	0.587801	0.556666	0.865414
ENSSSCG00000001471	BRD2	11560	-0.151333	0.0714235	-2.11882	0.0341059	0.161506	9607.33	-0.167369	0.139417	-1.2005	0.229947	0.928722	10202	-0.0541959	0.21676	-0.250028	0.802566	0.988618	9887.45	-0.111944	0.106176	-1.05433	0.291733	0.70437
ENSSSCG00000001472	SLA-DOA	563.307	-0.0413491	0.141317	-0.292599	0.769829	0.889272	630.233	-0.0768017	0.174885	-0.439155	0.66055	0.995655	513.488	0.0574389	0.29335	0.195803	0.844764	0.99083	574.569	-0.00671521	0.273315	-0.0245694	0.980398	0.996079
ENSSSCG00000001474	RXRB	460.997	0.118657	0.0922554	1.28618	0.198379	0.454903	385.117	0.152411	0.227251	0.670673	0.502429	0.989825	418.002	0.0729925	0.286674	0.254618	0.799018	0.988618	400.678	0.115573	0.14617	0.790677	0.429133	0.800016
ENSSSCG00000001475	SLC39A7	452.504	0.0804367	0.103589	0.7765	0.437454	0.679791	466.848	0.231081	0.191637	1.20583	0.227885	0.927071	346.118	-0.0672744	0.298604	-0.225296	0.821749	0.989273	409.254	0.117671	0.227053	0.518251	0.604283	0.887621
ENSSSCG00000001476	HSD17B8	321.719	0.153608	0.111332	1.37973	0.16767	0.413999	327.988	0.189248	0.229126	0.825956	0.408829	0.983944	373.341	0.0970581	0.248901	0.389946	0.696576	0.979188	349.47	0.143658	0.145404	0.987988	0.323159	0.730617
ENSSSCG00000001477	RING1	867.601	-0.177318	0.0813751	-2.17903	0.0293298	0.147046	810.06	-0.054638	0.177666	-0.307532	0.758438	0.995655	870.111	-0.270655	0.255864	-1.05781	0.290143	0.899985	838.33	-0.160176	0.123748	-1.29437	0.195537	0.616847
ENSSSCG00000001486	LRRC1	252.782	-0.124248	0.0958156	-1.29674	0.194721	0.451243	198.331	-0.114413	0.223418	-0.512102	0.608579	0.994088	267.904	-0.233593	0.250961	-0.930795	0.35196	0.920068	231.372	-0.177755	0.152172	-1.16812	0.242759	0.661851
ENSSSCG00000001488	GCLC	831.795	-0.190301	0.13125	-1.44992	0.147081	0.38516	738.445	-0.0994139	0.243547	-0.408191	0.683133	0.995655	856.944	-0.13749	0.227211	-0.60512	0.545099	0.96456	794.588	-0.128761	0.148034	-0.869811	0.384404	0.772134
ENSSSCG00000001493	PRIM2	480.188	-0.0935508	0.154859	-0.604105	0.545774	0.758532	460.57	-0.0971922	0.244957	-0.396773	0.691535	0.995655	505.585	-0.496216	0.301165	-1.64766	0.0994234	0.727536	481.775	-0.296175	0.184441	-1.6058	0.108318	0.499249
ENSSSCG00000001497	ZNF451	955.99	-0.164476	0.0869095	-1.8925	0.0584246	0.224267	827.235	-0.0968524	0.180552	-0.536424	0.591666	0.993215	939.784	-0.218359	0.242367	-0.900945	0.367618	0.920068	880.521	-0.154831	0.121501	-1.27432	0.202551	0.62538
ENSSSCG00000001499	DST	97.6642	-0.807358	0.22599	-3.57254	0.000353535	0.00726463	61.9209	-1.11379	0.527096	-2.11307	0.0345952	0.522955	99.8691	-0.956104	0.52788	-1.81121	0.0701079	0.679422	79.9575	-0.932522	0.430041	-2.16845	0.0301244	0.280959
ENSSSCG00000001501	VPS52	651.536	-0.075557	0.09531	-0.79275	0.427923	0.672984	584.129	0.0214222	0.204803	0.104599	0.916694	0.998795	641.986	-0.0928424	0.235765	-0.393792	0.693734	0.979182	611.547	-0.0352571	0.121033	-0.291302	0.770821	0.947322
ENSSSCG00000001502	RPS18	15141.3	-0.0306054	0.137391	-0.222761	0.823722	0.916808	16672.2	-0.18403	0.230883	-0.797067	0.425412	0.983944	17729.6	-0.0604249	0.26102	-0.231495	0.81693	0.98881	17170.3	-0.123287	0.157452	-0.78301	0.433621	0.802618
ENSSSCG00000001503	B3GALT4	89.7561	-0.403634	0.151492	-2.6644	0.00771268	0.0613998	71.6364	-0.623166	0.328378	-1.89771	0.0577342	0.638427	91.3037	-0.571629	0.317103	-1.80266	0.0714414	0.682026	80.9658	-0.597538	0.191616	-3.11842	0.00181826	0.0568553
ENSSSCG00000001504	WDR46	4.74036	-0.0523733	0.510598	-0.102572	0.918302	NA	3.55909	-0.285118	1.30901	-0.217812	0.827575	NA	3.53077	-0.526077	1.33257	-0.394784	0.693003	NA	3.54437	-0.326576	0.694676	-0.470113	0.638274	NA
ENSSSCG00000001505	PFDN6	391.332	-0.0396505	0.107812	-0.367775	0.713041	0.85973	497.901	-0.154223	0.261161	-0.590528	0.554837	0.993215	477.57	0.094813	0.252598	0.375352	0.707399	0.981374	488.06	-0.0467072	0.186954	-0.249833	0.802717	0.956984
ENSSSCG00000001506	RGL2	546.889	-0.0681092	0.0818327	-0.832299	0.40524	0.655991	482.82	-0.0881423	0.174385	-0.505447	0.613245	0.994186	544.054	-0.0458368	0.221091	-0.207321	0.83576	0.989763	511.813	-0.0632741	0.0988576	-0.640053	0.522138	0.847568
ENSSSCG00000001507	ZBTB22	4437.35	0.214416	0.0924657	2.31887	0.020402	0.118505	3236.31	0.281715	0.181178	1.55491	0.119967	0.806879	3194.21	0.246491	0.220573	1.1175	0.26378	0.893266	3215.44	0.266124	0.126564	2.10269	0.0354932	0.303563
ENSSSCG00000001509	DAXX	1286.42	0.686463	0.143598	4.78044	1.74912e-06	0.00012745	1234.4	0.888702	0.200361	4.4355	9.18603e-06	0.00213654	1133.44	0.837061	0.329987	2.53665	0.0111919	0.361194	1186.02	0.867462	0.187615	4.62362	3.77093e-06	0.000842767
ENSSSCG00000001510	KIFC1	24.9589	-0.735691	0.274531	-2.67981	0.00736648	0.0595232	17.8937	0.039142	0.646363	0.0605572	0.951712	0.998795	19.9486	-1.48614	0.689609	-2.15505	0.0311578	0.5323	18.8636	-0.750696	0.415168	-1.80818	0.0705793	0.417961
ENSSSCG00000001511	PHF1	420.345	0.0658427	0.0967196	0.680759	0.496024	0.723069	351.522	0.192917	0.231827	0.832162	0.405317	0.983944	402.388	-0.0339652	0.277828	-0.122252	0.902699	0.993328	375.629	0.0800813	0.148195	0.540377	0.588937	0.878463
ENSSSCG00000001512	CUTA	883.771	0.280877	0.0944131	2.97498	0.00293005	0.0321654	898.94	0.228016	0.173671	1.31292	0.189209	0.901207	857.684	0.292048	0.205588	1.42055	0.155448	0.809912	879.137	0.256792	0.116978	2.19521	0.0281484	0.272608
ENSSSCG00000001513	SYNGAP1	546.057	-0.377203	0.131634	-2.86555	0.00416287	0.0415227	309.288	-0.396888	0.278663	-1.42426	0.154372	0.85645	412.597	-0.324658	0.289199	-1.12261	0.261604	0.892386	358.392	-0.354789	0.190283	-1.86453	0.0622474	0.397139
ENSSSCG00000001516		1017.29	0.510686	0.101578	5.02754	4.96806e-07	4.93691e-05	1086.3	0.745729	0.169258	4.40586	1.05363e-05	0.00233008	1045.47	0.333825	0.201245	1.6588	0.0971558	0.723307	1066.63	0.5458	0.131861	4.13919	3.48529e-05	0.00418461
ENSSSCG00000001517		37.0031	-0.000928454	0.28147	-0.00329859	0.997368	0.998343	38.0761	0.40544	0.491936	0.824173	0.409841	0.983944	34.6922	-0.0778657	0.536801	-0.145055	0.884668	0.99083	36.4626	0.18211	0.318104	0.572487	0.566992	0.870314
ENSSSCG00000001518	ITPR3	2852.79	0.0699112	0.145778	0.479574	0.631531	0.811802	2466.17	0.00229668	0.203178	0.0113038	0.990981	0.999052	2183.14	0.206907	0.330144	0.626716	0.530845	0.961868	2331.1	0.10282	0.197831	0.519737	0.603247	0.88697
ENSSSCG00000001520	LEMD2	1203.57	0.0972243	0.089841	1.08218	0.279172	0.544481	1158.46	0.242323	0.16941	1.43039	0.152604	0.854058	1305.76	0.0347525	0.207803	0.167238	0.867183	0.99083	1228.27	0.137939	0.0986151	1.39876	0.161884	0.578333
ENSSSCG00000001527	ILRUN	5364.65	0.120373	0.0631216	1.90701	0.0565196	0.219611	4431.62	0.143642	0.169188	0.849005	0.395879	0.98314	5182.21	0.0670485	0.225848	0.296874	0.766562	0.985988	4787.71	0.104915	0.111965	0.937037	0.34874	0.748254
ENSSSCG00000001531	SNRPC	711.128	-0.0660666	0.090779	-0.727775	0.466751	0.702805	739.032	-0.0257855	0.186572	-0.138206	0.890077	0.998795	712.8	-0.0875323	0.226302	-0.386794	0.698908	0.979358	726.306	-0.0538334	0.124858	-0.431156	0.666355	0.910078
ENSSSCG00000001532	UHRF1BP1	550.019	-0.174812	0.0971017	-1.80029	0.0718141	0.252716	453.26	-0.171656	0.207695	-0.826481	0.408531	0.983944	427.47	-0.0370841	0.223836	-0.165675	0.868412	0.99083	440.877	-0.107205	0.13162	-0.814505	0.415355	0.790084
ENSSSCG00000001533	TAF11	480.688	-0.151589	0.0843702	-1.79671	0.0723816	0.254176	447.496	-0.119109	0.25147	-0.473652	0.635748	0.995655	520.193	-0.128863	0.266956	-0.482713	0.629299	0.974383	481.92	-0.121745	0.15633	-0.778766	0.436117	0.803218
ENSSSCG00000001534	ANKS1A	653.733	-0.167435	0.0837543	-1.99912	0.0455952	0.193914	549.739	-0.0928384	0.189777	-0.489197	0.624702	0.99491	558.636	-0.0806476	0.209426	-0.385088	0.700172	0.980009	553.842	-0.0841366	0.117437	-0.71644	0.473719	0.823996
ENSSSCG00000001535	TCP11	71.0292	-0.199808	0.180475	-1.10712	0.26824	0.533857	57.9036	-0.0138693	0.398467	-0.0348067	0.972234	0.998818	78.9792	-0.0186268	0.37498	-0.0496741	0.960382	0.998416	67.9057	-0.0135325	0.232774	-0.0581359	0.95364	0.993601
ENSSSCG00000001537	ZNF76	134.28	-0.1591	0.153288	-1.03791	0.29931	0.564215	133.811	-0.01255	0.299078	-0.0419624	0.966529	0.998818	124.407	-0.091176	0.302524	-0.301385	0.763121	0.98534	129.287	-0.0509885	0.174712	-0.291843	0.770407	0.947322
ENSSSCG00000001538	DEF6	23.1792	-0.414242	0.250373	-1.65449	0.098027	0.303565	15.8124	-0.504164	0.764448	-0.659514	0.509566	0.990567	26.2418	-0.496286	0.542152	-0.915399	0.359982	0.920068	20.7693	-0.480597	0.37839	-1.27011	0.204045	0.627608
ENSSSCG00000001539	PPARD	1331.64	0.223707	0.136114	1.64353	0.100273	0.307588	911.073	0.151882	0.176437	0.860827	0.389333	0.980602	1057.08	0.511511	0.213562	2.39514	0.016614	0.426902	980.325	0.333758	0.11365	2.93672	0.00331707	0.0803814
ENSSSCG00000001543		1941.33	0.00259324	0.1953	0.0132782	0.989406	0.993659	1604.63	-0.222043	0.32003	-0.693818	0.487796	0.988754	1614.07	0.23417	0.402834	0.581307	0.561034	0.96456	1608.5	-0.00599751	0.262697	-0.0228305	0.981785	0.9962
ENSSSCG00000001544	TEAD3	55.4861	-1.21475	0.392507	-3.09485	0.0019691	0.024508	37.0189	-1.66067	0.710685	-2.33672	0.0194536	0.404983	36.7766	-0.137189	0.811388	-0.169079	0.865735	0.99083	36.8846	-0.807911	0.585411	-1.38008	0.167563	0.584282
ENSSSCG00000001546	FANCE	100.393	0.0111162	0.151344	0.0734499	0.941448	0.971189	86.9988	0.243016	0.30663	0.792538	0.428047	0.983944	105.284	-0.0342605	0.353192	-0.0970024	0.922724	0.995919	95.6666	0.0938728	0.179972	0.521596	0.601952	0.886126
ENSSSCG00000001549	FKBP5	3619.54	-0.334475	0.17323	-1.93081	0.0535066	0.213636	2444.69	-0.032927	0.198624	-0.165776	0.868333	0.998795	3455.2	-0.598294	0.399938	-1.49597	0.134662	0.781276	2924.5	-0.343921	0.24646	-1.39544	0.162882	0.579607
ENSSSCG00000001550	ARMC12	89.6439	-0.424009	0.231331	-1.83291	0.0668159	0.242664	54.9852	0.105422	0.476593	0.2212	0.824937	0.99681	86.996	-0.466785	0.426417	-1.09467	0.273662	0.899985	70.2009	-0.24421	0.335844	-0.727152	0.467133	0.819946
ENSSSCG00000001554	SRPK1	3661.91	0.0225954	0.0816845	0.276618	0.782073	0.895296	3525.55	0.0184142	0.164973	0.11162	0.911125	0.998795	4022.81	-0.00863253	0.189931	-0.045451	0.963748	0.998768	3761.14	0.00522257	0.0868134	0.0601586	0.952029	0.993359
ENSSSCG00000001555	SLC26A8	90.2561	-0.252993	0.179291	-1.41108	0.158222	0.401838	97.457	0.028845	0.304538	0.094717	0.92454	0.998795	94.4295	-0.123412	0.328088	-0.376156	0.706801	0.981374	95.9894	-0.0476303	0.170018	-0.280148	0.779364	0.948879
ENSSSCG00000001556	MAPK14	2566.81	0.189585	0.111531	1.69984	0.0891612	0.287197	2230.43	0.290589	0.214202	1.35661	0.174905	0.884025	2914.65	-0.0795773	0.176459	-0.450967	0.652014	0.977132	2555.48	0.0911761	0.177729	0.513007	0.607946	0.888732
ENSSSCG00000001560	BNIP5	36.045	0.551465	0.385168	1.43175	0.152214	0.393393	39.3946	1.06559	0.615438	1.73144	0.083374	0.71834	39.2221	0.149448	0.804232	0.185827	0.85258	0.99083	39.3059	0.880404	0.541763	1.62507	0.104147	0.493875
ENSSSCG00000001561	ETV7	251.867	1.33547	0.340656	3.92029	8.84407e-05	0.00255461	387.915	2.20835	0.7238	3.05104	0.00228049	0.114364	176.684	1.46754	0.706704	2.0766	0.0378389	0.559205	287.374	1.9558	0.630323	3.10285	0.00191668	0.0581781
ENSSSCG00000001562	KCTD20	1566.96	-0.0428907	0.0673076	-0.637235	0.523972	0.743681	1401.65	-0.00317477	0.155836	-0.0203726	0.983746	0.999052	1523.23	-0.0965864	0.184481	-0.523556	0.600587	0.967434	1459.12	-0.0500966	0.0760783	-0.658488	0.510225	0.843973
ENSSSCG00000001563	STK38	6407.82	0.209524	0.103211	2.03006	0.0423507	0.185507	5096.58	0.173891	0.167065	1.04086	0.29794	0.960992	5694.66	0.188151	0.237922	0.79081	0.429055	0.93928	5380.23	0.181982	0.113258	1.60679	0.108101	0.499101
ENSSSCG00000001564	SRSF3	5446.89	-0.198775	0.0885872	-2.24384	0.0248427	0.132428	4582.66	-0.306093	0.162071	-1.88863	0.0589418	0.645803	5146.65	-0.0807911	0.222928	-0.362409	0.717046	0.983197	4849.53	-0.194365	0.113313	-1.7153	0.0862907	0.45803
ENSSSCG00000001565	CDKN1A	1275.99	0.269657	0.160002	1.68533	0.0919248	0.29298	747.74	0.14901	0.227835	0.654028	0.513094	0.990802	1135.83	0.181601	0.199734	0.909218	0.363235	0.920068	932.247	0.174105	0.16973	1.02578	0.304997	0.715731
ENSSSCG00000001570	PI16	20.3463	-0.394013	0.373221	-1.05571	0.291101	0.55606	18.6194	-0.382822	0.6953	-0.550585	0.581918	0.993215	26.2092	-0.783882	0.739095	-1.0606	0.288873	0.899985	22.2149	-0.767293	0.507135	-1.51299	0.130281	0.532524
ENSSSCG00000001571	MTCH1	4258.89	0.225855	0.230601	0.979419	0.327373	0.589891	3492.26	0.102876	0.160249	0.641978	0.520887	0.993041	4514.9	-0.411338	0.28041	-1.46692	0.142398	0.792796	3978.28	-0.189596	0.196109	-0.96679	0.333649	0.737508
ENSSSCG00000001572	FGD2	436.29	0.320934	0.114963	2.79162	0.00524448	0.0478653	444.039	0.490319	0.240254	2.04083	0.0412674	0.562791	468.124	0.259043	0.298543	0.867693	0.385563	0.923351	455.428	0.375364	0.16988	2.20957	0.0271347	0.267908
ENSSSCG00000001573	PIM1	17014.6	0.291868	0.139426	2.09335	0.0363178	0.168328	15042	0.277139	0.144941	1.91208	0.0558658	0.63118	15885.7	0.618886	0.289935	2.13457	0.0327965	0.54007	15440.3	0.448529	0.166456	2.69457	0.00704785	0.125973
ENSSSCG00000001577	TBC1D22B	354.953	0.0939968	0.140921	0.66702	0.504759	0.72987	312.972	0.0942989	0.20653	0.456587	0.647968	0.995655	323.381	0.241433	0.355034	0.680028	0.496487	0.95501	317.861	0.145042	0.180727	0.802547	0.422237	0.795071
ENSSSCG00000001578	CMTR1	2904.37	0.0457158	0.118951	0.384325	0.700737	0.851983	2824.76	0.17385	0.15574	1.11629	0.264299	0.950467	2881.53	0.200561	0.287932	0.696558	0.48608	0.952351	2851.03	0.191564	0.143797	1.33218	0.182801	0.60235
ENSSSCG00000001595	DAAM2	6.76169	-0.387994	0.457816	-0.847489	0.396723	NA	6.98428	-0.591433	1.05321	-0.561551	0.574422	0.993215	3.97578	-0.515162	1.31183	-0.392705	0.694537	NA	5.55193	-0.608499	0.665926	-0.913763	0.360841	NA
ENSSSCG00000001596	MOCS1	133.607	0.309265	0.232315	1.33123	0.183112	0.437054	94.4929	0.216501	0.389376	0.55602	0.578197	0.993215	101.711	0.414169	0.543019	0.762716	0.445633	0.943734	97.9182	0.295477	0.307773	0.960051	0.337029	0.739402
ENSSSCG00000001597	LRFN2	63.9089	0.0944203	0.218123	0.432876	0.665105	0.830664	38.9961	0.444685	0.440163	1.01027	0.312364	0.960992	53.4002	-0.249691	0.550826	-0.453303	0.65033	0.977132	45.836	0.0561054	0.314262	0.17853	0.858306	0.973165
ENSSSCG00000001611	NFYA	954.15	0.0870139	0.0837314	1.0392	0.29871	0.563569	760.932	0.0544385	0.195843	0.277971	0.781035	0.995655	946.874	0.147422	0.221395	0.665877	0.50549	0.956278	849.238	0.106818	0.124635	0.857042	0.391421	0.777249
ENSSSCG00000001612		27.4711	-0.471518	0.308984	-1.52603	0.127003	0.354396	22.5068	-0.974227	0.627663	-1.55215	0.120627	0.807849	32.6084	-0.643024	0.567621	-1.13284	0.257281	0.887688	27.2976	-0.772526	0.350826	-2.20202	0.027664	0.270753
ENSSSCG00000001613	TREML1	3368.99	0.410797	0.502952	0.816771	0.414059	0.661978	3392.28	-0.122425	0.165616	-0.739212	0.459778	0.98867	3541.66	-0.265557	0.358953	-0.73981	0.459415	0.947367	3463.01	-0.200936	0.187581	-1.07119	0.284082	0.698343
ENSSSCG00000001616	TREML2	984.27	0.146237	0.1085	1.34781	0.177719	0.429025	841.913	0.170376	0.202912	0.839653	0.401103	0.983944	1018.67	0.328279	0.234877	1.39767	0.162213	0.811098	925.91	0.254691	0.161113	1.58082	0.113919	0.507927
ENSSSCG00000001619	FOXP4	355.676	-0.0597399	0.168368	-0.354818	0.722726	0.865504	204.088	-0.0640675	0.342259	-0.18719	0.851512	0.998795	229.493	-0.0645534	0.359967	-0.179331	0.857677	0.99083	216.13	-0.055646	0.218142	-0.255091	0.798653	0.955398
ENSSSCG00000001621	TFEB	283.441	0.0744182	0.121293	0.61354	0.539519	0.754014	264.963	0.145817	0.210649	0.69223	0.488793	0.988843	230.668	0.120331	0.291115	0.413346	0.679353	0.979182	248.587	0.12926	0.181574	0.711888	0.476534	0.825509
ENSSSCG00000001624	FRS3	23.3038	-0.607218	0.309925	-1.95924	0.0500848	0.205335	13.6008	0.360951	0.723567	0.498849	0.617886	0.99491	18.7316	-1.12704	0.627744	-1.79538	0.0725935	0.682083	16.0365	-0.441716	0.406372	-1.08698	0.277047	0.691244
ENSSSCG00000001629	USP49	63.1952	-0.754662	0.214565	-3.51717	0.000436166	0.00854116	49.9434	-0.667209	0.520804	-1.28111	0.200154	0.902971	62.719	-1.04991	0.490933	-2.1386	0.0324677	0.54007	55.9881	-0.831243	0.339871	-2.44576	0.0144547	0.190613
ENSSSCG00000001638	MRPS10	752.412	-0.107292	0.0886857	-1.2098	0.226357	0.490356	648.713	-0.152735	0.194954	-0.78344	0.433369	0.983944	760.666	-0.123331	0.218483	-0.564488	0.572422	0.966659	701.755	-0.136616	0.126038	-1.08393	0.278398	0.692178
ENSSSCG00000001639	TRERF1	1808.2	-0.30206	0.0996813	-3.03026	0.00244343	0.0286414	943.105	-0.178909	0.233008	-0.767824	0.442592	0.985892	1448.58	-0.215543	0.19096	-1.12873	0.259011	0.890523	1183.41	-0.202418	0.166779	-1.21369	0.224868	0.645185
ENSSSCG00000001641	UBR2	5056.49	-0.0597287	0.0714027	-0.836504	0.402871	0.654384	4156.42	-0.0660715	0.166476	-0.396884	0.691453	0.995655	4892.75	0.0562312	0.166658	0.337405	0.735812	0.983405	4505.8	-0.0020566	0.086412	-0.0237999	0.981012	0.996079
ENSSSCG00000001646	BICRAL	2568.07	-0.00409388	0.112325	-0.0364468	0.970926	0.984618	1619	0.0223314	0.18816	0.118683	0.905526	0.998795	2169.18	0.230179	0.28638	0.803752	0.42154	0.935754	1880.34	0.137199	0.169698	0.808491	0.418808	0.792676
ENSSSCG00000001651	CNPY3	312.922	-0.024307	0.128832	-0.188672	0.85035	0.930228	326.187	0.112206	0.245975	0.456169	0.648268	0.995655	307.081	-0.217672	0.296943	-0.733041	0.463533	0.948063	317.025	-0.0356349	0.176481	-0.201919	0.83998	0.968568
ENSSSCG00000001653	PEX6	286.112	0.09434	0.104768	0.900462	0.367875	0.625781	234.771	0.249629	0.216924	1.15077	0.249828	0.94144	292.29	0.0121385	0.22327	0.0543668	0.956643	0.998416	262.083	0.122975	0.125073	0.983229	0.325495	0.732076
ENSSSCG00000001654	PPP2R5D	827.794	-0.0345705	0.0939194	-0.368087	0.712808	0.859705	569.588	0.069647	0.20848	0.33407	0.738327	0.995655	615.737	-0.21063	0.287318	-0.733091	0.463503	0.948063	591.373	-0.0710886	0.150678	-0.471792	0.637076	0.901994
ENSSSCG00000001655	MEA1	922.655	0.103367	0.109169	0.94685	0.343715	0.604427	1110.34	0.0907842	0.170616	0.532096	0.59466	0.993504	1144.51	-0.152059	0.221434	-0.686702	0.49227	0.95501	1126.24	-0.0273405	0.11073	-0.24691	0.804978	0.957029
ENSSSCG00000001656	RRP36	352.45	0.0856854	0.117491	0.729295	0.465821	0.70208	329.772	0.0377335	0.232323	0.162418	0.870976	0.998795	374.174	0.130566	0.31537	0.414009	0.678868	0.979182	350.798	0.0537013	0.247261	0.217185	0.828064	0.965127
ENSSSCG00000001657	CUL7	240.855	-0.348874	0.159816	-2.18298	0.0290375	0.146187	184.756	-0.0138208	0.282457	-0.0489305	0.960975	0.998818	229.309	-0.731218	0.315528	-2.31745	0.0204795	0.463941	205.889	-0.385888	0.212646	-1.81469	0.0695712	0.415531
ENSSSCG00000001658	MRPL2	215.439	-0.0681569	0.144686	-0.471067	0.637593	0.814563	214.125	0.00506649	0.226169	0.0224013	0.982128	0.998917	235.499	-0.326829	0.28807	-1.13455	0.256564	0.886555	224.23	-0.16019	0.149236	-1.0734	0.283091	0.698072
ENSSSCG00000001659	KLC4	722.286	0.120856	0.0840144	1.43852	0.150286	0.390251	597.663	0.156824	0.187239	0.837564	0.402276	0.983944	701.346	0.183134	0.221467	0.826912	0.408287	0.930669	646.85	0.172467	0.106944	1.61268	0.106813	0.496388
ENSSSCG00000001660	PTK7	9.32852	-0.0582942	0.418788	-0.139198	0.889294	NA	5.71675	0.207281	1.07105	0.193531	0.846543	NA	13.371	-0.107492	0.800631	-0.134259	0.893198	0.991707	9.35695	-0.0124016	0.561264	-0.0220959	0.982371	0.996399
ENSSSCG00000001661	SRF	718.116	0.0865153	0.126636	0.683183	0.494492	0.722065	657.959	0.162857	0.215147	0.756955	0.449077	0.988535	709.587	0.051755	0.282172	0.183417	0.854471	0.99083	682.309	0.100489	0.155484	0.646301	0.518084	0.84554
ENSSSCG00000001664	TTBK1	20.1457	0.410403	0.367271	1.11744	0.263807	0.528646	13.7239	0.545646	0.7436	0.73379	0.463077	0.98867	20.3127	1.39507	0.740457	1.88406	0.0595566	0.64714	16.8565	1.03022	0.436496	2.3602	0.018265	0.216878
ENSSSCG00000001667	ZNF318	2181.9	-0.292551	0.0915093	-3.19696	0.00138885	0.0191085	1805.32	-0.44152	0.227142	-1.94381	0.0519184	0.609009	1682.34	-0.271977	0.234576	-1.15944	0.246278	0.879246	1746.33	-0.372062	0.193488	-1.92292	0.0544905	0.371832
ENSSSCG00000001672	CRIP3	115.775	-0.210638	0.195935	-1.07504	0.282355	0.547921	117.63	-0.523322	0.420633	-1.24413	0.213452	0.916444	89.926	-0.194022	0.460714	-0.421134	0.673658	0.979182	104.432	-0.366369	0.337505	-1.08552	0.277692	0.691764
ENSSSCG00000001679	XPO5	2480.67	0.00175301	0.0900449	0.0194682	0.984468	0.990951	2044	0.0795263	0.172087	0.462128	0.643989	0.995655	2313.1	-0.0919972	0.225965	-0.40713	0.683912	0.979182	2171.39	-0.00932288	0.127069	-0.0733686	0.941513	0.992085
ENSSSCG00000001680	ABCC10	1180.66	-0.109027	0.109465	-0.995997	0.319252	0.583416	843.109	-0.056962	0.174764	-0.325936	0.744473	0.995655	902.919	0.139215	0.261184	0.533015	0.594023	0.966821	871.398	0.0332017	0.140212	0.236797	0.812814	0.959148
ENSSSCG00000001683	POLH	772.028	-0.0817179	0.10169	-0.803594	0.421632	0.667946	646.847	-0.144085	0.199852	-0.720958	0.470936	0.98867	808.641	-0.232294	0.269515	-0.861894	0.388746	0.923864	723.579	-0.184138	0.151695	-1.21387	0.224797	0.645185
ENSSSCG00000001688	TJAP1	369.608	0.0220095	0.114548	0.192143	0.84763	0.928711	329.352	-0.0126037	0.260325	-0.0484154	0.961385	0.998818	390.266	0.0983775	0.243876	0.403391	0.68666	0.979182	358.229	0.0445062	0.147741	0.301245	0.763227	0.945618
ENSSSCG00000001689	GTPBP2	2224.87	0.106562	0.0881112	1.2094	0.226508	0.490356	2039.69	0.0365137	0.179714	0.203177	0.838997	0.997873	2431.16	0.216059	0.306479	0.704972	0.480827	0.952162	2225.55	0.125272	0.171533	0.730304	0.465204	0.819646
ENSSSCG00000001691	RSPH9	1597.46	0.0567848	0.157258	0.361092	0.718031	0.862699	1582.81	-0.236162	0.241337	-0.978556	0.327799	0.967942	1982.16	0.52321	0.37197	1.40659	0.159548	0.810357	1772.57	0.161744	0.242992	0.665636	0.505644	0.841097
ENSSSCG00000001692	MRPS18A	1399.98	-0.0925231	0.0832818	-1.11096	0.266584	0.532416	1173.31	-0.0269702	0.162913	-0.16555	0.868511	0.998795	1114.92	-0.0149234	0.272397	-0.0547854	0.956309	0.998416	1145.25	-0.0274131	0.148299	-0.18485	0.853347	0.971925
ENSSSCG00000001695	VEGFA	256.565	0.419588	0.173724	2.41526	0.0157241	0.0998959	207.602	-0.0457388	0.234752	-0.194839	0.845519	0.997873	310.638	0.58219	0.352622	1.65103	0.0987319	0.727536	256.592	0.311448	0.225863	1.37892	0.167919	0.58522
ENSSSCG00000001696		465.178	-0.0117187	0.100564	-0.116529	0.907233	0.957027	472.972	-0.0403045	0.244718	-0.164698	0.869182	0.998795	531.213	0.174119	0.291207	0.597923	0.549891	0.96456	500.545	0.0681646	0.163764	0.416237	0.677236	0.914733
ENSSSCG00000001697	TMEM63B	756.315	-0.0604196	0.17152	-0.352259	0.724644	0.866501	681.267	-0.247849	0.187678	-1.32061	0.186632	0.901207	748.231	0.559447	0.323087	1.73156	0.0833512	0.704075	713.011	0.172199	0.224059	0.768545	0.442164	0.805768
ENSSSCG00000001698	CAPN11	564.865	0.0343034	0.149822	0.228961	0.8189	0.914393	598.932	-0.0862335	0.256114	-0.3367	0.736343	0.995655	631.273	0.577358	0.426313	1.35431	0.175638	0.821911	614.213	0.216292	0.321903	0.671918	0.501636	0.838891
ENSSSCG00000001700	SLC29A1	882.857	-0.247732	0.171375	-1.44556	0.148302	0.387213	757.1	0.0397524	0.26441	0.150344	0.880493	0.998795	988.772	-0.627436	0.406613	-1.54308	0.122812	0.766875	866.78	-0.313273	0.26227	-1.19447	0.232294	0.651401
ENSSSCG00000001701	HSP90AB1	26740.4	0.0307093	0.0912927	0.336383	0.736582	0.872915	25648.3	0.00058619	0.172763	0.00339303	0.997293	0.999052	25433.4	0.0149199	0.178901	0.0833972	0.933536	0.997892	25538.9	0.0077625	0.101651	0.0763646	0.939129	0.991567
ENSSSCG00000001702	SLC35B2	508.841	0.186277	0.136016	1.36952	0.170836	0.419244	438.794	0.178084	0.18586	0.958163	0.337981	0.967942	537.835	0.378359	0.271805	1.39202	0.163916	0.811173	485.815	0.287934	0.138767	2.07494	0.037992	0.313471
ENSSSCG00000001703	NFKBIE	1648.61	0.500583	0.183306	2.73087	0.00631683	0.0541007	1514.78	0.594655	0.177521	3.34978	0.000808769	0.0568244	1590.29	0.757197	0.415043	1.82438	0.0680946	0.675715	1550.44	0.674204	0.216614	3.11246	0.00185534	0.0571558
ENSSSCG00000001706	AARS2	364.081	-0.0191155	0.112375	-0.170105	0.864927	0.937591	356.782	0.200205	0.220172	0.909313	0.363185	0.967942	326.486	-0.151528	0.238857	-0.634388	0.525828	0.959739	342.28	0.0494452	0.181514	0.272405	0.785311	0.950921
ENSSSCG00000001708	CDC5L	3008.85	-0.0137417	0.0584287	-0.235188	0.814063	0.911857	2944.57	0.0209827	0.154988	0.135382	0.89231	0.998795	3487.96	-0.015613	0.207815	-0.075129	0.940112	0.998416	3202.31	-0.000622854	0.105326	-0.00591358	0.995282	0.999021
ENSSSCG00000001709	SUPT3H	715.177	-0.149284	0.156177	-0.955868	0.339139	0.600368	498.876	-0.299108	0.302856	-0.987624	0.323337	0.967458	570.203	-0.0639338	0.314922	-0.203015	0.839124	0.99083	532.724	-0.158956	0.219883	-0.722911	0.469734	0.821298
ENSSSCG00000001710	RUNX2	1266.93	-0.391378	0.144469	-2.70907	0.00674715	0.05635	674.057	-0.505596	0.344122	-1.46924	0.141769	0.841395	991.255	-0.287422	0.274811	-1.04589	0.295611	0.903528	824.798	-0.38198	0.266914	-1.4311	0.152402	0.563658
ENSSSCG00000001718	CYP39A1	55.4792	-0.0969986	0.236813	-0.4096	0.682099	0.842173	49.6533	-0.00161991	0.4364	-0.00371197	0.997038	0.999052	63.0302	-0.421223	0.63602	-0.66228	0.507792	0.956997	55.9828	-0.233428	0.367348	-0.63544	0.525141	0.848847
ENSSSCG00000001720	SLC25A27	94.7092	-0.00506852	0.164891	-0.0307386	0.975478	0.986741	84.5236	-0.169373	0.434313	-0.389979	0.696552	0.995655	86.885	0.0964929	0.347987	0.277289	0.781558	0.987961	85.6201	-0.0146896	0.259877	-0.056525	0.954924	0.993746
ENSSSCG00000001723	PLA2G7	52.6553	-0.61796	0.263726	-2.34319	0.0191194	0.113304	39.5515	-0.305585	0.527849	-0.578926	0.562639	0.993215	64.9697	-0.976804	0.515918	-1.89333	0.0583139	0.64692	51.6394	-0.686618	0.367327	-1.86923	0.0615912	0.39483
ENSSSCG00000001727	TNFRSF21	589.348	0.202261	0.167731	1.20587	0.227868	0.491665	357.545	-0.0274288	0.249547	-0.109914	0.912477	0.998795	614.109	0.225453	0.326667	0.690161	0.490093	0.954444	479.57	0.129913	0.269408	0.482216	0.629652	0.898371
ENSSSCG00000001731	CENPQ	63.9098	-0.36706	0.178116	-2.06079	0.0393229	0.17684	52.3143	-0.11533	0.438254	-0.263158	0.792428	0.995655	80.6171	-0.61309	0.402262	-1.52411	0.127482	0.772422	65.7547	-0.414733	0.281595	-1.4728	0.140805	0.546111
ENSSSCG00000001732	MMUT	1225.78	0.0415546	0.0756078	0.549608	0.582588	0.782202	1234.55	0.0134382	0.152482	0.08813	0.929773	0.998795	1236.19	0.13195	0.207915	0.634634	0.525667	0.959739	1235.03	0.0739313	0.120228	0.614928	0.538602	0.856388
ENSSSCG00000001735	RHAG	10143	0.0918339	0.136382	0.673357	0.50072	0.727339	10875.3	0.0250358	0.274503	0.0912042	0.92733	0.998795	11494.7	0.561093	0.402872	1.39273	0.163701	0.811173	11167.9	0.284056	0.249038	1.14061	0.254032	0.671704
ENSSSCG00000001736	CRISP2	167.934	0.1072	0.218911	0.489699	0.624347	0.808343	145.421	0.332551	0.366969	0.906211	0.364824	0.968314	163.542	0.740119	0.31722	2.33314	0.0196409	0.457166	154.038	0.415421	0.979709	0.424025	0.671548	0.912455
ENSSSCG00000001750	PAQR8	382.117	0.187947	0.165349	1.13667	0.255677	0.52162	315.331	0.474636	0.26016	1.8244	0.0680922	0.677936	327.804	0.0718448	0.295551	0.243088	0.807938	0.988618	321.205	0.278539	0.208074	1.33865	0.180684	0.600494
ENSSSCG00000001755	HYKK	45.4114	-0.126535	0.232819	-0.54349	0.586793	0.784634	44.5067	0.318173	0.468263	0.679476	0.496837	0.989825	33.4554	-0.232335	0.624435	-0.372072	0.70984	0.981374	39.2408	0.0887158	0.371798	0.238613	0.811406	0.958733
ENSSSCG00000001756	IREB2	1700.2	-0.0488402	0.0854023	-0.571883	0.567401	0.771458	1419.76	-0.00892848	0.159778	-0.0558807	0.955437	0.998818	1722.55	-0.095148	0.207139	-0.459343	0.645988	0.976787	1563.4	-0.0520709	0.101641	-0.512301	0.608441	0.888814
ENSSSCG00000001757	WDR61	1146.96	-0.0811528	0.0732314	-1.10817	0.267789	0.533574	1068.93	-0.13684	0.158628	-0.862646	0.388332	0.979551	1125.68	-0.0946833	0.203969	-0.464203	0.642502	0.976787	1095.67	-0.114259	0.08601	-1.32844	0.184032	0.603895
ENSSSCG00000001765	ADAMTS7	22.1692	0.240118	0.359402	0.668103	0.504068	0.729464	18.1294	1.07762	0.756397	1.42468	0.15425	0.856309	12.6028	0.426166	0.808163	0.527326	0.597967	0.966831	15.498	0.844791	0.515994	1.63721	0.101586	0.491061
ENSSSCG00000001769	MORF4L1	6154.86	-0.155822	0.069681	-2.23622	0.0253377	0.133805	5485.79	-0.285656	0.146919	-1.9443	0.0518587	0.609009	6235.43	-0.174163	0.186651	-0.933095	0.350771	0.920068	5840.86	-0.229034	0.0833402	-2.74819	0.00599261	0.113158
ENSSSCG00000001770	CTSH	2473.48	0.337303	0.0990578	3.40512	0.000661358	0.0113342	2550.03	0.14468	0.152048	0.951539	0.341331	0.967942	2441.57	0.454431	0.211356	2.15007	0.0315494	0.533795	2497.88	0.295096	0.142414	2.0721	0.0382557	0.314182
ENSSSCG00000001773	TMED3	177.293	0.320098	0.146771	2.18094	0.0291877	0.146499	175.502	0.261658	0.269454	0.971067	0.331515	0.967942	186.002	0.122414	0.309596	0.3954	0.692547	0.979182	180.455	0.186581	0.162886	1.14547	0.252014	0.671092
ENSSSCG00000001779	ZFAND6	3553.31	0.0986897	0.10432	0.946026	0.344135	0.604653	3338.52	-0.0193145	0.22323	-0.0865229	0.931051	0.998795	3644.03	0.342652	0.319026	1.07406	0.282797	0.899985	3483.13	0.161396	0.194796	0.828537	0.407366	0.786419
ENSSSCG00000001780	FAH	101.867	0.235546	0.190914	1.23378	0.217284	0.478795	63.4107	0.0422209	0.370946	0.11382	0.909381	0.998795	128.595	0.435486	0.497556	0.87525	0.381438	0.9223	94.4041	0.287289	0.357796	0.802941	0.422009	0.795071
ENSSSCG00000001782	ABHD17C	212.161	0.51984	0.231748	2.24312	0.0248889	0.132462	81.6784	-0.324288	0.321639	-1.00824	0.313341	0.960992	218.581	0.98886	0.476928	2.0734	0.0381354	0.5604	146.801	0.640503	0.468933	1.36587	0.171979	0.591423
ENSSSCG00000001787	IL16	2673.56	-0.00960493	0.100391	-0.0956756	0.923778	0.963632	2323.04	-0.0490241	0.19654	-0.249435	0.803024	0.995655	2448.39	0.0396897	0.21345	0.185943	0.852489	0.99083	2382	-0.00424298	0.124052	-0.0342032	0.972715	0.99484
ENSSSCG00000001788	STARD5	60.1329	-0.459273	0.242984	-1.89014	0.0587394	0.225086	51.7018	-0.465655	0.712735	-0.653336	0.513539	0.990802	61.1878	-0.293504	0.489694	-0.599362	0.548932	0.96456	56.2078	-0.420415	0.424455	-0.990483	0.321938	0.729501
ENSSSCG00000001792	EFL1	715.66	0.0592206	0.0932234	0.635255	0.525262	0.744559	622.743	0.103806	0.192925	0.538067	0.590531	0.993215	636.233	-0.0201015	0.309269	-0.0649967	0.948177	0.998416	629.006	0.0507151	0.160916	0.315165	0.752636	0.942859
ENSSSCG00000001795	SH3GL3	22.5069	-0.406937	0.559173	-0.727749	0.466767	0.702805	17.2724	0.223872	0.696594	0.321381	0.747921	0.995655	22.6655	-2.47057	0.790573	-3.12504	0.0017778	0.171074	19.8375	-0.933465	0.524715	-1.77899	0.0752409	0.430184
ENSSSCG00000001800	TM6SF1	390.251	-0.0201219	0.120556	-0.166908	0.867442	0.939094	303.023	0.0943237	0.198433	0.475343	0.634542	0.995655	393.931	-0.395875	0.233293	-1.6969	0.0897159	0.713436	346.217	-0.160051	0.198392	-0.806741	0.419816	0.7931
ENSSSCG00000001801	BTBD1	722.261	0.0286723	0.109038	0.262956	0.792585	0.899672	626.051	0.0370343	0.179435	0.206394	0.836483	0.997873	769.725	-0.195501	0.217679	-0.898115	0.369124	0.920068	694.276	-0.0826564	0.12394	-0.666909	0.50483	0.840781
ENSSSCG00000001804	HOMER2	144.38	0.333343	0.180583	1.84593	0.0649027	0.238122	127.031	0.412068	0.292313	1.40968	0.158633	0.857428	131.198	0.0404206	0.377454	0.107088	0.914719	0.99507	128.99	0.251907	0.206335	1.22086	0.222139	0.6428
ENSSSCG00000001805	WHAMM	1165.69	-0.310511	0.118659	-2.61683	0.008875	0.0678024	917.197	-0.207587	0.182385	-1.13818	0.255044	0.943907	967.473	-0.203226	0.248374	-0.818224	0.413229	0.930669	940.851	-0.205432	0.123127	-1.66846	0.0952246	0.479588
ENSSSCG00000001807	AP3B2	35.9635	-0.159154	0.282336	-0.563704	0.572955	0.775481	46.1513	-0.0586944	0.518795	-0.113136	0.909923	0.998795	29.8213	0.428401	0.693362	0.61786	0.536668	0.962346	38.372	0.130304	0.429238	0.303571	0.761455	0.945576
ENSSSCG00000001808	CPEB1	5.51818	-1.34103	0.525321	-2.55278	0.0106868	NA	4.68272	-0.527472	1.1328	-0.465636	0.641476	NA	5.92631	-1.06515	1.12609	-0.945889	0.344205	NA	5.27275	-0.924011	0.625311	-1.47768	0.139493	NA
ENSSSCG00000001810	PDE8A	1365.65	-0.248987	0.114263	-2.17907	0.0293268	0.147046	1126.01	-0.306004	0.231167	-1.32373	0.185592	0.901207	1282.57	0.0423237	0.239041	0.177057	0.859464	0.99083	1200.21	-0.131027	0.169787	-0.771715	0.440283	0.804941
ENSSSCG00000001814	IQGAP1	32040.4	0.0936423	0.101311	0.924307	0.355326	0.614325	27420.5	-0.013811	0.143083	-0.0965249	0.923104	0.998795	34523.6	-0.0603808	0.180508	-0.334506	0.737998	0.983405	30794.4	-0.0382781	0.0993376	-0.385333	0.699991	0.923646
ENSSSCG00000001816	BLM	955.12	0.16398	0.0809784	2.02498	0.0428692	0.18704	919.572	0.0854728	0.15805	0.540797	0.588647	0.993215	1078.04	0.323551	0.231442	1.39798	0.162119	0.811098	994.715	0.201384	0.162754	1.23735	0.215956	0.639516
ENSSSCG00000001817	FURIN	2259.27	0.210848	0.167615	1.25793	0.208417	0.468236	1580.23	-0.184653	0.27034	-0.683039	0.494582	0.989825	2073	0.628744	0.286327	2.19589	0.0280995	0.517139	1814.23	0.266525	0.234855	1.13485	0.256439	0.674598
ENSSSCG00000001818	FES	1191	0.142307	0.110895	1.28327	0.199399	0.456059	1215.29	0.0678906	0.217088	0.312732	0.754484	0.995655	1427.72	0.241984	0.360341	0.67154	0.501876	0.956278	1316.25	0.161581	0.19827	0.814953	0.415099	0.790042
ENSSSCG00000001819	MAN2A2	566.928	0.215889	0.0945395	2.28358	0.0223961	0.125095	531.533	0.257437	0.206453	1.24695	0.212415	0.915908	502.624	0.32328	0.216256	1.49489	0.134942	0.781276	517.695	0.286817	0.133324	2.15127	0.031455	0.28501
ENSSSCG00000001820	HDDC3	237.524	0.10605	0.176337	0.601402	0.547572	0.759607	227.402	-0.0147982	0.2351	-0.0629441	0.949811	0.998795	260.982	-0.0886739	0.329809	-0.268864	0.788034	0.988618	243.328	-0.0493407	0.162779	-0.303115	0.761803	0.945576
ENSSSCG00000001821	UNC45A	330.233	0.0341779	0.0914625	0.373682	0.708641	0.856829	306.193	0.0212339	0.205667	0.103244	0.91777	0.998795	341.82	-0.0577023	0.23866	-0.241776	0.808954	0.988618	323.068	-0.0159129	0.107088	-0.148597	0.881872	0.978719
ENSSSCG00000001822	RCCD1	148.508	-0.0864838	0.159263	-0.543025	0.587113	0.78486	128.635	0.222862	0.328823	0.677758	0.497925	0.989825	127.66	-0.305308	0.321904	-0.948445	0.342903	0.916384	128.146	-0.0109473	0.20944	-0.0522694	0.958314	0.99439
ENSSSCG00000001823	UROC1	9.83494	0.0828292	0.458027	0.180839	0.856494	0.93293	7.1088	0.700619	1.0101	0.69361	0.487927	0.988754	10.9688	0.585719	0.905326	0.646971	0.517651	0.959148	8.94548	0.561864	0.544213	1.03243	0.301869	0.712859
ENSSSCG00000001824	ZXDC	1225.01	-0.0755744	0.0935768	-0.807619	0.41931	0.666252	1125.01	0.0720283	0.192036	0.375076	0.707604	0.995655	1142.73	-0.20969	0.217579	-0.963741	0.335176	0.914536	1133.14	-0.0599172	0.130733	-0.458318	0.646724	0.903764
ENSSSCG00000001825	SLC41A3	268.624	-0.208373	0.0926536	-2.24895	0.024516	0.131634	245.871	-0.10241	0.243862	-0.419952	0.674521	0.995655	278.882	-0.295357	0.297565	-0.99258	0.320915	0.911283	261.493	-0.198275	0.153256	-1.29375	0.195752	0.616847
ENSSSCG00000001834	MFGE8	258.801	0.00402478	0.130148	0.0309247	0.97533	0.986741	179.784	-0.162011	0.298073	-0.543527	0.586767	0.993215	227.547	0.0882543	0.249618	0.353557	0.723671	0.983197	202.455	-0.0348219	0.171219	-0.203377	0.83884	0.968294
ENSSSCG00000001835	ABHD2	1553.58	0.311291	0.150486	2.06857	0.0385864	0.174887	1232.38	0.305401	0.1702	1.79437	0.0727549	0.690189	1441.77	0.542016	0.338317	1.60209	0.109135	0.74176	1331.67	0.426918	0.171741	2.48582	0.0129253	0.179814
ENSSSCG00000001837	FANCI	364.504	-0.137803	0.133015	-1.03599	0.300205	0.564921	321.699	0.0831396	0.193563	0.429522	0.667544	0.995655	376.241	-0.598535	0.299106	-2.00108	0.0453838	0.593243	347.51	-0.264705	0.173466	-1.52598	0.127015	0.52638
ENSSSCG00000001838	POLG	1622.1	-0.016493	0.0743866	-0.22172	0.824532	0.9172	1502.58	0.0163861	0.174239	0.0940438	0.925074	0.998795	1538.63	-0.0598469	0.215993	-0.277078	0.78172	0.987961	1519.27	-0.0207303	0.108066	-0.191831	0.847875	0.970845
ENSSSCG00000001840	KIF7	95.3628	-0.45858	0.193298	-2.3724	0.0176728	0.107619	92.9151	-0.297736	0.36804	-0.808977	0.418528	0.983944	83.2351	-0.531036	0.462536	-1.1481	0.250929	0.881335	88.2705	-0.39264	0.270774	-1.45006	0.147041	0.556023
ENSSSCG00000001844	PLIN1	11.9034	-0.303137	0.381408	-0.794782	0.42674	0.672262	10.8947	-0.0437165	0.797191	-0.0548382	0.956267	0.998818	7.59501	-1.28106	1.24034	-1.03283	0.301684	NA	9.32044	-0.512645	0.61806	-0.829442	0.406854	0.785944
ENSSSCG00000001848	MESP2	23.635	-0.366131	0.438816	-0.834362	0.404077	0.655143	18.2728	-0.609181	0.624252	-0.975857	0.329135	0.967942	30.8465	-0.948926	0.59109	-1.60538	0.10841	0.741118	24.2543	-0.841315	0.414954	-2.02749	0.0426122	0.332127
ENSSSCG00000001849	ANPEP	94.2699	0.189179	0.42721	0.442826	0.657892	0.825994	38.8687	-0.446209	0.491739	-0.907411	0.36419	0.967942	129.783	-0.0723491	0.715919	-0.101058	0.919505	0.99565	82.1312	-0.291019	0.502818	-0.578777	0.56274	0.868435
ENSSSCG00000001850		150.506	0.209949	0.226707	0.92608	0.354404	0.613367	141.896	0.101014	0.385387	0.26211	0.793237	0.995655	162.967	-0.455602	0.385797	-1.18094	0.237628	0.875585	151.899	-0.186711	0.26764	-0.697619	0.485416	0.831145
ENSSSCG00000001852	IDH2	2310.61	0.240183	0.081057	2.96313	0.00304525	0.0329948	2468.67	0.321595	0.160363	2.00542	0.0449178	0.581406	2312.15	0.109646	0.253531	0.432477	0.665395	0.978874	2393.79	0.222797	0.142512	1.56336	0.117969	0.514353
ENSSSCG00000001858	CIB1	2622.63	0.20164	0.181369	1.11176	0.26624	0.53208	2467.72	0.00159686	0.17341	0.00920858	0.992653	0.999052	2686.62	-0.247938	0.309275	-0.801676	0.42274	0.936471	2571.47	-0.129323	0.17736	-0.729158	0.465905	0.819646
ENSSSCG00000001862	ETFA	708.692	0.126046	0.0975351	1.29231	0.19625	0.452708	734.474	0.0353983	0.222052	0.159415	0.873342	0.998795	791.971	0.14483	0.189118	0.765817	0.443785	0.943036	761.655	0.0905663	0.115348	0.785159	0.43236	0.801833
ENSSSCG00000001865	SCAPER	857.64	-0.32706	0.093154	-3.51096	0.000446492	0.00864647	755.659	-0.357797	0.175187	-2.04237	0.0411148	0.562514	933.772	-0.423406	0.301783	-1.40301	0.160613	0.811098	840.114	-0.391785	0.162699	-2.40803	0.0160387	0.201073
ENSSSCG00000001866	RCN2	901.548	-0.0496674	0.104338	-0.476024	0.634057	0.812433	829.197	-0.0641687	0.225943	-0.284004	0.776407	0.995655	912.973	-0.0615729	0.197846	-0.311217	0.755636	0.984711	868.86	-0.0616879	0.119993	-0.514094	0.607186	0.888496
ENSSSCG00000001867	PSTPIP1	1136.67	0.18654	0.10116	1.844	0.065183	0.238783	1079.51	0.363969	0.173237	2.10099	0.0356421	0.529412	1164.71	0.119576	0.22351	0.534993	0.592655	0.966821	1119.85	0.24341	0.109505	2.22282	0.0262283	0.263979
ENSSSCG00000001868	TSPAN3	1370.83	-0.402914	0.0609521	-6.61034	3.83439e-11	2.21994e-08	1122.69	-0.388378	0.156722	-2.47814	0.0132069	0.334261	1274.87	-0.381518	0.269852	-1.4138	0.15742	0.809912	1194.68	-0.385718	0.142553	-2.70579	0.00681422	0.123434
ENSSSCG00000001869	PEAK1	484.932	0.0671923	0.147781	0.454675	0.649343	0.821242	316.635	-0.170442	0.287382	-0.593085	0.553124	0.993215	405.171	0.410666	0.294476	1.39457	0.163147	0.811173	358.692	0.155905	0.209777	0.743196	0.457363	0.814682
ENSSSCG00000001871	HMG20A	1400.99	-0.212609	0.0744219	-2.8568	0.0042793	0.0423352	1126.8	-0.153859	0.16438	-0.935995	0.349276	0.967942	1197.26	-0.256445	0.272196	-0.942132	0.346125	0.918597	1159.96	-0.201903	0.127328	-1.5857	0.112808	0.505701
ENSSSCG00000001877	SNUPN	113.054	-0.0292165	0.163306	-0.178906	0.858011	0.933819	104.307	0.269514	0.326701	0.824958	0.409396	0.983944	130.107	-0.434982	0.326376	-1.33277	0.182609	0.827741	116.546	-0.112268	0.213605	-0.525588	0.599174	0.884358
ENSSSCG00000001878	PTPN9	653.894	-0.035858	0.0897053	-0.399731	0.689355	0.845565	473.393	-0.117548	0.249154	-0.471788	0.637078	0.995655	675.825	-0.0177569	0.22527	-0.078825	0.937172	0.998228	569.557	-0.0591957	0.180146	-0.328598	0.742459	0.939374
ENSSSCG00000001880	SIN3A	3105.94	0.0236195	0.0928863	0.254283	0.799277	0.903418	2359.76	0.0811647	0.192171	0.422357	0.672764	0.995655	2628.29	-0.0313367	0.227637	-0.13766	0.890509	0.991578	2487	0.0262558	0.128238	0.204742	0.837773	0.967993
ENSSSCG00000001881	MAN2C1	548.138	-0.156369	0.0855377	-1.82807	0.067539	0.244256	446.657	-0.0780712	0.200272	-0.389826	0.696665	0.995655	523.264	-0.199396	0.213628	-0.933382	0.350623	0.920068	482.97	-0.135454	0.106805	-1.26823	0.204715	0.628602
ENSSSCG00000001882	NEIL1	255.725	-0.419108	0.180077	-2.32738	0.0199449	0.116587	223.498	-0.0764538	0.309075	-0.247363	0.804627	0.995818	283.164	-1.06456	0.559499	-1.9027	0.0570797	0.642742	251.72	-0.592715	0.34037	-1.74139	0.0816158	0.443602
ENSSSCG00000001884	COMMD4	205.848	0.103272	0.117976	0.875361	0.381378	0.637273	212.476	0.261302	0.24777	1.05461	0.291602	0.960579	214.179	-0.226488	0.330776	-0.684715	0.493524	0.95501	213.206	0.0234458	0.183842	0.127532	0.898519	0.982024
ENSSSCG00000001885	C15orf39	465.148	-0.269607	0.137254	-1.96428	0.0494973	0.204052	300.658	-0.314977	0.302008	-1.04294	0.296975	0.960992	265.529	-0.176159	0.248042	-0.710196	0.477582	0.951667	283.847	-0.23773	0.190654	-1.24692	0.212427	0.635206
ENSSSCG00000001887	SCAMP5	147.255	-0.173049	0.14996	-1.15397	0.248512	0.514048	112.351	0.113693	0.328154	0.346461	0.728996	0.995655	127.567	-0.591214	0.38666	-1.52903	0.126258	0.770338	119.554	-0.229808	0.228238	-1.00688	0.313994	0.723188
ENSSSCG00000001888	RPP25	13.7714	-0.466367	0.397911	-1.17204	0.241181	0.505838	14.5335	-0.937587	0.737775	-1.27083	0.203789	0.908321	15.1328	0.250158	1.08716	0.230102	0.818012	0.989241	14.8164	-0.318692	0.603659	-0.527934	0.597545	0.883574
ENSSSCG00000001892	SCAMP2	1270.69	0.0753029	0.0877547	0.858107	0.390833	0.645059	1118.83	0.178861	0.151741	1.17872	0.238508	0.932254	1197.66	0.0721707	0.191186	0.377489	0.70581	0.981374	1156.06	0.125767	0.0736678	1.70722	0.0877816	0.461221
ENSSSCG00000001898	ULK3	1035.71	-0.012337	0.0826999	-0.149178	0.881413	0.945706	988.619	0.142808	0.163767	0.872021	0.383197	0.977046	1044.58	-0.0906684	0.23062	-0.39315	0.694209	0.979182	1014.98	0.0269329	0.110115	0.24459	0.806774	0.95729
ENSSSCG00000001899	LMAN1L	46.7775	-0.554622	0.231463	-2.39616	0.0165678	0.103092	28.2764	0.108926	0.572797	0.190166	0.849179	0.998795	43.2802	-0.95735	0.557833	-1.7162	0.0861261	0.710366	35.4093	-0.458071	0.369411	-1.24	0.214974	0.638431
ENSSSCG00000001900	CSK	3921.61	0.199406	0.108103	1.84459	0.0650969	0.238599	3088.69	0.202336	0.184929	1.09413	0.273898	0.954011	3291.28	0.0579312	0.230017	0.251856	0.801153	0.988618	3184.43	0.132058	0.119085	1.10894	0.267458	0.683682
ENSSSCG00000001903	EDC3	1724.57	0.143414	0.0672412	2.13282	0.0329391	0.158542	1559.34	0.158407	0.154484	1.02539	0.305178	0.960992	1732.49	0.175374	0.202219	0.867252	0.385804	0.923657	1641.39	0.167486	0.0817681	2.04831	0.04053	0.323802
ENSSSCG00000001904	CLK3	2368.22	-0.105368	0.0746008	-1.41243	0.157824	0.401295	2083.44	-0.0614049	0.172821	-0.35531	0.722357	0.995655	2381.72	-0.148824	0.243353	-0.611555	0.540832	0.962808	2224.73	-0.104914	0.117964	-0.889373	0.373803	0.765018
ENSSSCG00000001905	ARID3B	858.895	-0.0957932	0.0923955	-1.03677	0.299841	0.564657	593.133	-0.0658803	0.189711	-0.347268	0.72839	0.995655	754.786	-0.0511528	0.259232	-0.197324	0.843574	0.99083	669.902	-0.0646569	0.138034	-0.468413	0.63949	0.901994
ENSSSCG00000001907	UBL7	1424.02	0.123163	0.141314	0.871558	0.383449	0.639434	1470.82	-0.155839	0.204451	-0.76223	0.445923	0.987437	1385.39	0.497285	0.417423	1.19132	0.233527	0.87498	1429.89	0.142863	0.248061	0.575919	0.56467	0.869077
ENSSSCG00000001912	PML	3853.36	0.564712	0.141793	3.98265	6.81512e-05	0.00210688	2822.45	0.772247	0.155653	4.96133	7.00106e-07	0.00032567	2460.88	0.784475	0.356435	2.20089	0.0277439	0.514808	2649.57	0.778187	0.194445	4.00209	6.27859e-05	0.00595891
ENSSSCG00000001913	STOML1	424.565	0.0908539	0.153021	0.593734	0.55269	0.763494	455.848	0.293753	0.242765	1.21003	0.226266	0.926648	396.76	0.134172	0.392825	0.341556	0.732685	0.983197	427.607	0.228282	0.230381	0.990891	0.321739	0.729501
ENSSSCG00000001917	CD276	80.7626	-0.0166334	0.165298	-0.100626	0.919847	0.962841	63.5705	0.168133	0.439822	0.382275	0.702257	0.995655	76.337	-0.212327	0.400359	-0.530341	0.595876	0.966821	69.6195	-0.01565	0.259397	-0.0603323	0.951891	0.993359
ENSSSCG00000001918	NPTN	2956.43	0.158652	0.143279	1.1073	0.268165	0.533857	2690.55	0.0242937	0.202622	0.119897	0.904565	0.998795	2996.94	-0.0191436	0.266517	-0.0718287	0.942738	0.998416	2835.81	-0.00569664	0.162475	-0.0350617	0.972031	0.99484
ENSSSCG00000001921	NEO1	35.2924	0.436872	0.218964	1.99518	0.0460232	0.195419	39.3684	0.557192	0.548411	1.01601	0.309624	0.960992	35.039	0.178648	0.514728	0.347073	0.728537	0.983197	37.3	0.405729	0.335591	1.209	0.226664	0.647075
ENSSSCG00000001924		2344.95	-0.190053	0.0587669	-3.23401	0.00122065	0.0175584	1907.53	-0.251354	0.14738	-1.70548	0.0881055	0.731412	2257.18	-0.120627	0.176255	-0.684392	0.493727	0.95501	2073.37	-0.182813	0.0791196	-2.31058	0.0208559	0.232304
ENSSSCG00000001925	ADPGK	638.82	0.244487	0.087189	2.8041	0.00504575	0.0466068	569.875	0.287669	0.176549	1.6294	0.103228	0.773419	602.875	0.239673	0.195524	1.2258	0.220273	0.864417	585.447	0.261069	0.0915213	2.85255	0.00433703	0.0950409
ENSSSCG00000001927		1110.69	0.25051	0.0952333	2.63049	0.00852616	0.0659822	1004.88	0.216589	0.19544	1.10821	0.267771	0.951757	1172.47	0.0753845	0.247778	0.304243	0.760943	0.98534	1084.39	0.144033	0.129345	1.11356	0.26547	0.681996
ENSSSCG00000001930		12409.3	0.14623	0.11482	1.27356	0.202819	0.460858	9892.53	0.10497	0.162744	0.645004	0.518924	0.993041	10965.6	-0.10401	0.212026	-0.490556	0.623741	0.97241	10400.7	0.00122142	0.104197	0.0117222	0.990647	0.998039
ENSSSCG00000001934	SEC23A	439.077	0.0992113	0.10449	0.949485	0.342374	0.603383	379.372	-0.0483741	0.193351	-0.250187	0.802442	0.995655	437.065	0.0480566	0.230803	0.208215	0.835061	0.989698	406.736	0.00411772	0.104926	0.0392441	0.968696	0.99484
ENSSSCG00000001946	MBIP	859.571	-0.265719	0.0929949	-2.85735	0.0042719	0.0422934	695.393	-0.228398	0.180329	-1.26656	0.205311	0.909254	816.817	-0.192523	0.264857	-0.726895	0.46729	0.948914	752.978	-0.213621	0.139146	-1.53523	0.124727	0.523331
ENSSSCG00000001947	BRMS1L	45.3508	-0.153052	0.219516	-0.697224	0.485662	0.716352	41.9431	-0.122518	0.559459	-0.218993	0.826655	0.99681	44.9004	-0.0795241	0.433716	-0.183355	0.854519	0.99083	43.3401	-0.119077	0.298481	-0.398942	0.689936	0.921637
ENSSSCG00000001950	PSMA6	5189.33	0.147864	0.119727	1.23501	0.216826	0.478093	5293.55	0.0560119	0.184776	0.303134	0.761788	0.995655	5843.79	-0.076916	0.242689	-0.316932	0.751295	0.984711	5553.93	-0.0135253	0.137319	-0.0984954	0.921539	0.98845
ENSSSCG00000001952	NFKBIA	27263.1	0.640635	0.219117	2.92371	0.00345884	0.0363233	25145.6	0.629893	0.250002	2.51955	0.0117505	0.315597	27221.8	0.870706	0.404826	2.15082	0.0314907	0.533795	26130.7	0.760552	0.236786	3.21198	0.00131824	0.0472498
ENSSSCG00000001955	SRP54	947.912	0.0557517	0.0947166	0.588616	0.556119	0.765337	855.958	-0.142663	0.185982	-0.767082	0.443033	0.986209	1001.62	0.176697	0.197887	0.892918	0.371901	0.920068	925.032	0.016753	0.126134	0.13282	0.894336	0.981248
ENSSSCG00000001958	BAZ1A	5242.74	0.20364	0.0890624	2.28649	0.0222259	0.124878	5147.92	0.0521886	0.179428	0.29086	0.771158	0.995655	5864.54	0.413959	0.213303	1.94071	0.0522938	0.625137	5488.01	0.233897	0.1232	1.89852	0.057628	0.382776
ENSSSCG00000001959	CFL2	137.374	-0.156509	0.144457	-1.08343	0.278619	0.544114	112.345	-0.406265	0.346913	-1.17109	0.241564	0.934603	133.231	-0.122939	0.352517	-0.348745	0.72728	0.983197	122.252	-0.257421	0.208626	-1.23389	0.217245	0.640144
ENSSSCG00000001960	EAPP	416.487	0.093917	0.10614	0.88484	0.376243	0.632422	412.819	0.0850203	0.215519	0.394492	0.693218	0.995655	463.905	0.221841	0.235445	0.94222	0.34608	0.918597	437.002	0.153424	0.120341	1.27491	0.202341	0.625304
ENSSSCG00000001963	EGLN3	2748.15	0.28653	0.212956	1.34548	0.178469	0.430056	2412.85	0.113852	0.22974	0.495569	0.620198	0.99491	2773.28	-0.29109	0.290089	-1.00345	0.315643	0.911283	2583.96	-0.0962292	0.213299	-0.451148	0.651883	0.904871
ENSSSCG00000001966	ARHGAP5	363.692	-1.20097	0.188119	-6.38409	1.72422e-10	7.17492e-08	318.103	-1.61798	0.231868	-6.97802	2.99368e-12	1.34616e-08	416.507	-1.26842	0.372641	-3.40386	0.000664411	0.0963754	364.749	-1.43636	0.22133	-6.48965	8.60387e-11	1.93257e-07
ENSSSCG00000001968	NUBPL	398.731	0.020224	0.108348	0.186657	0.851929	0.931081	362.514	-0.0462634	0.268923	-0.172032	0.863412	0.998795	429.511	0.210038	0.290519	0.722975	0.469695	0.949076	394.302	0.0761104	0.193461	0.393414	0.694013	0.922904
ENSSSCG00000001970		177.853	-0.188243	0.12919	-1.4571	0.14509	0.382245	168.408	-0.1852	0.301793	-0.613666	0.539436	0.993215	171.543	-0.194608	0.340789	-0.571051	0.567965	0.96598	169.874	-0.177672	0.202895	-0.875682	0.381203	0.770636
ENSSSCG00000001971	HECTD1	5717.46	-0.156573	0.0548636	-2.85385	0.00431929	0.0425412	4824.08	-0.188878	0.150765	-1.2528	0.210278	0.914584	5768.34	-0.156213	0.179703	-0.869281	0.384694	0.923149	5272	-0.172826	0.0905464	-1.9087	0.0563003	0.376555
ENSSSCG00000001972	AP4S1	280.489	-0.218842	0.105211	-2.08002	0.0375238	0.171648	223.864	-0.270607	0.260683	-1.03807	0.299238	0.960992	268.471	-0.214245	0.267213	-0.801776	0.422682	0.936471	245.036	-0.241527	0.156724	-1.5411	0.123293	0.5219
ENSSSCG00000001973	SCFD1	761.327	-0.117603	0.0894621	-1.31456	0.188657	0.444002	646.21	-0.164126	0.216832	-0.756926	0.449094	0.988535	789.535	-0.093036	0.222664	-0.417831	0.67607	0.979182	714.254	-0.123897	0.139872	-0.885787	0.375732	0.766666
ENSSSCG00000001974	G2E3	859.983	-0.0885007	0.101054	-0.875775	0.381152	0.637056	679.728	-0.0725787	0.198008	-0.366544	0.713959	0.995655	890.154	-0.105795	0.254258	-0.416093	0.677342	0.979182	779.669	-0.0879283	0.166328	-0.528645	0.597052	0.883063
ENSSSCG00000001978	GZMH	1802.1	0.0875133	0.176889	0.494735	0.620787	0.806321	1552.08	0.406617	0.673435	0.603795	0.54598	0.993215	2192.44	0.396065	0.313743	1.26239	0.20681	0.85014	1856.27	0.308224	0.333118	0.925272	0.354824	0.751818
ENSSSCG00000001979		48.6839	-0.629371	0.321749	-1.95609	0.0504541	0.206257	38.1488	-1.02892	0.650728	-1.58118	0.113837	0.794859	70.9867	-0.931061	0.544459	-1.71007	0.0872536	0.710366	53.7369	-0.976678	0.50217	-1.94492	0.051785	0.363748
ENSSSCG00000001982		20.5085	0.491859	0.346042	1.42139	0.155205	0.396833	12.4133	0.769676	0.892245	0.862628	0.388342	0.979551	24.3026	0.266564	0.768355	0.346928	0.728646	0.983197	18.0632	0.441087	0.557797	0.790766	0.429081	0.800016
ENSSSCG00000001983	SDR39U1	28.222	-0.150499	0.25777	-0.583848	0.559322	0.767151	27.2303	-0.422527	0.566068	-0.746425	0.455411	0.98867	33.7688	-0.410144	0.50122	-0.818293	0.41319	0.930669	30.3308	-0.410867	0.294058	-1.39723	0.162344	0.578965
ENSSSCG00000001984	KHNYN	3264.29	0.353981	0.0767447	4.61245	3.97953e-06	0.0002387	2957.5	0.407912	0.156861	2.60046	0.00930987	0.284348	3118.06	0.409085	0.235616	1.73624	0.0825222	0.70329	3033.24	0.409927	0.109313	3.75002	0.000176822	0.0126086
ENSSSCG00000001985	CBLN3	64.5223	0.115808	0.215858	0.5365	0.591613	0.787841	60.7902	0.496048	0.442407	1.12125	0.262182	0.949233	59.7756	0.144625	0.576018	0.251077	0.801755	0.988618	60.2926	0.354981	0.327448	1.08408	0.278328	0.692178
ENSSSCG00000001987	RIPK3	81.4298	0.269112	0.183464	1.46684	0.142421	0.378344	79.2379	0.576809	0.383811	1.50285	0.132879	0.827519	72.9749	-0.0456305	0.40697	-0.112122	0.910726	0.994685	76.2472	0.308478	0.25534	1.20811	0.227006	0.647075
ENSSSCG00000001988	ADCY4	47.1308	0.0980367	0.256372	0.3824	0.702164	0.852887	47.6187	0.445332	0.454693	0.979412	0.327376	0.967942	36.041	-0.0717701	0.606153	-0.118403	0.905749	0.993927	42.1031	0.332625	0.38662	0.860341	0.389601	0.776233
ENSSSCG00000001989	CIDEB	2032.18	0.55726	0.432935	1.28717	0.198036	0.454462	2363.6	0.143959	0.162963	0.883382	0.37703	0.974844	2080.37	-0.204343	0.399356	-0.511682	0.608874	0.967921	2228.52	-0.040437	0.251189	-0.160982	0.872107	0.976033
ENSSSCG00000001990	NOP9	148.949	-0.150541	0.146947	-1.02446	0.305616	0.57109	132.768	-0.0577561	0.310531	-0.185991	0.852452	0.998795	138.302	-0.444703	0.31008	-1.43415	0.151528	0.807312	135.351	-0.256758	0.190169	-1.35016	0.176965	0.597742
ENSSSCG00000001991	DHRS1	476.664	0.137776	0.0792213	1.73912	0.082013	0.273843	376.364	0.18495	0.191053	0.968058	0.333016	0.967942	427.852	0.0527066	0.218585	0.241126	0.809458	0.988618	400.765	0.113456	0.12486	0.908666	0.363527	0.757928
ENSSSCG00000001992	RABGGTA	77.9116	-0.316223	0.2194	-1.44131	0.149498	0.389091	73.5608	-0.391215	0.477258	-0.819714	0.412379	0.983944	78.4884	-0.121528	0.442156	-0.274853	0.783429	0.988045	75.885	-0.244392	0.294294	-0.830432	0.406294	0.78563
ENSSSCG00000001993	TGM1	366.503	0.833232	0.439298	1.89674	0.0578629	0.222817	345.161	1.39662	0.418087	3.34049	0.000836293	0.0572322	338.618	1.4805	0.513811	2.8814	0.00395913	0.23528	342.015	1.46799	0.344806	4.25742	2.06799e-05	0.00293372
ENSSSCG00000001994	TINF2	3128.5	-0.0617357	0.0926282	-0.666489	0.505098	0.730202	2664.3	-0.127634	0.21222	-0.601425	0.547557	0.993215	2869.8	0.0440327	0.177845	0.24759	0.804452	0.988618	2761.54	-0.0414219	0.116175	-0.356547	0.721431	0.931536
ENSSSCG00000002000	IPO4	2470.71	0.313027	0.0856695	3.65389	0.000258299	0.00574209	2452.42	0.481756	0.156483	3.07865	0.00207942	0.107066	2354.02	0.263686	0.202844	1.29995	0.193619	0.838473	2405.19	0.376016	0.117518	3.19965	0.00137596	0.0487514
ENSSSCG00000002001	REC8	584.178	0.0250888	0.167379	0.149893	0.880849	0.945461	487.591	0.277303	0.179434	1.54543	0.122242	0.80807	477.753	0.249592	0.372553	0.66995	0.50289	0.956278	482.793	0.244755	0.198265	1.23448	0.217022	0.640144
ENSSSCG00000002002	IRF9	868.144	0.392839	0.185233	2.12078	0.03394	0.161007	871.107	0.957717	0.268538	3.5664	0.000361913	0.032998	772.776	0.444369	0.332683	1.33571	0.181643	0.827741	824.125	0.720083	0.231087	3.11607	0.00183281	0.0571558
ENSSSCG00000002003		1234.27	0.215757	0.0929369	2.32154	0.0202578	0.118054	1252.76	0.473633	0.197626	2.39662	0.0165473	0.371197	1139.96	0.0872686	0.214796	0.406286	0.684532	0.979182	1198.77	0.296365	0.151019	1.96243	0.049712	0.356556
ENSSSCG00000002004	PSME2	2600.9	0.306552	0.102149	3.00104	0.00269062	0.0303147	3241.2	0.54945	0.166162	3.30671	0.000943978	0.0627304	2785.43	0.129955	0.245512	0.529322	0.596582	0.966821	3023.76	0.365577	0.162481	2.24996	0.0244515	0.255064
ENSSSCG00000002005	EMC9	141.945	0.0652129	0.15099	0.431903	0.665812	0.831313	152.099	0.278717	0.288448	0.966263	0.333913	0.967942	166.234	-0.0435694	0.309965	-0.140562	0.888216	0.991578	158.768	0.109623	0.172567	0.635246	0.525268	0.848892
ENSSSCG00000002006	PSME1	755.418	0.32839	0.0754639	4.35162	1.35138e-05	0.000629197	651.032	0.40742	0.167709	2.42932	0.015127	0.358634	617.028	0.228373	0.195731	1.16677	0.243302	0.876853	634.71	0.325311	0.108568	2.99638	0.00273208	0.0727674
ENSSSCG00000002008		2015.46	0.178544	0.0804076	2.22049	0.0263854	0.137308	1718.03	0.165573	0.158392	1.04534	0.295867	0.960992	1948.51	0.154839	0.19892	0.778397	0.436335	0.942458	1827.2	0.162105	0.0855401	1.89507	0.0580826	0.384319
ENSSSCG00000002009	PCK2	919.608	0.0775335	0.15979	0.485221	0.62752	0.809863	952.232	-0.12486	0.209614	-0.595667	0.551398	0.993215	845.319	0.115287	0.323636	0.356226	0.721672	0.983197	901.212	-0.020013	0.193952	-0.103186	0.917816	0.987026
ENSSSCG00000002012	CARMIL3	27.3825	-0.278701	0.234499	-1.1885	0.234637	0.499172	19.5183	0.372953	0.649606	0.574122	0.565885	0.993215	28.2533	-0.52466	0.644273	-0.814344	0.415448	0.932385	23.6622	-0.147258	0.406175	-0.362549	0.716942	0.930848
ENSSSCG00000002013	DHRS4	2670.91	0.327661	0.125032	2.62061	0.00877731	0.0673264	3301.09	0.247198	0.309029	0.799918	0.423758	0.983944	3269.73	0.691433	0.275862	2.50645	0.012195	0.377318	3285.53	0.44181	0.245252	1.80146	0.071631	0.420295
ENSSSCG00000002014	JPH4	39.0805	-0.160668	0.214936	-0.747518	0.454751	0.692291	36.9005	-0.141416	0.568762	-0.248639	0.80364	0.995655	34.8547	-0.136168	0.458751	-0.296824	0.766601	0.985988	35.9194	-0.123968	0.300828	-0.412088	0.680275	0.915799
ENSSSCG00000002015	AP1G2	117.94	0.137922	0.169928	0.81165	0.416992	0.664268	118.958	0.264371	0.331315	0.797945	0.424903	0.983944	122.477	0.0556566	0.373555	0.148992	0.88156	0.99083	120.623	0.147858	0.230813	0.640596	0.521785	0.847505
ENSSSCG00000002016	THTPA	279.752	-0.021822	0.136416	-0.159966	0.872907	0.941403	220.088	0.237081	0.224405	1.05649	0.290745	0.960579	248.228	-0.205304	0.534565	-0.384058	0.700935	0.980185	233.41	0.0189356	0.287184	0.0659355	0.947429	0.992826
ENSSSCG00000002020		580.068	-0.298653	0.102235	-2.92123	0.00348657	0.0365568	570.762	-0.428615	0.212813	-2.01405	0.0440046	0.578466	676.271	-0.198871	0.254041	-0.782831	0.433726	0.94085	620.773	-0.314232	0.143935	-2.18315	0.0290246	0.276685
ENSSSCG00000002023	PABPN1	1992.33	-0.110145	0.0885696	-1.2436	0.213646	0.474882	1624.39	0.136493	0.153463	0.889421	0.373777	0.973266	1829.29	-0.256552	0.262634	-0.976842	0.328647	0.912671	1721.36	-0.0612958	0.134057	-0.457237	0.647501	0.904137
ENSSSCG00000002025	SLC22A17	376.047	0.181052	0.119928	1.50968	0.131125	0.360161	340.956	0.262263	0.254703	1.02968	0.303161	0.960992	363.263	0.119643	0.237426	0.503918	0.614319	0.969486	351.477	0.185446	0.1503	1.23384	0.217263	0.640144
ENSSSCG00000002028	CMTM5	572.429	0.1318	0.415235	0.31741	0.750933	0.880992	485.12	-0.15941	0.235592	-0.676635	0.498637	0.989825	743.815	-0.66698	0.42581	-1.56638	0.11726	0.75686	608.194	-0.456722	0.283491	-1.61106	0.107166	0.496824
ENSSSCG00000002034	ACIN1	5053.26	-0.117494	0.0703041	-1.67123	0.0946764	0.29787	3981.79	-0.0525959	0.169168	-0.310909	0.75587	0.995655	4568.2	-0.0780232	0.239525	-0.325741	0.74462	0.983659	4259.72	-0.0652111	0.126651	-0.514889	0.606631	0.888069
ENSSSCG00000002035	C14orf119	535.936	0.0927725	0.0827277	1.12142	0.262109	0.526615	507.658	0.00319276	0.181735	0.0175682	0.985983	0.999052	581.85	0.144679	0.216966	0.666831	0.50488	0.956278	542.836	0.0760911	0.0979079	0.77717	0.437058	0.803824
ENSSSCG00000002037	CDH24	324.465	-0.452307	0.124974	-3.61921	0.000295509	0.00630608	221.134	-0.400179	0.326373	-1.22614	0.220145	0.922308	281.718	-0.522848	0.591457	-0.884	0.376696	0.920695	249.846	-0.4648	0.338266	-1.37407	0.169421	0.587566
ENSSSCG00000002039	MMP14	218.415	1.92971	0.324146	5.95322	2.62924e-09	7.29396e-07	148.064	0.900746	0.4433	2.03191	0.0421626	0.565991	255.038	2.20768	0.387366	5.6992	1.2037e-08	2.6912e-05	198.927	1.80909	0.39488	4.58136	4.61957e-06	0.00097278
ENSSSCG00000002040	MRPL52	143.863	0.107673	0.145806	0.738466	0.460231	0.697365	140.878	-0.210637	0.263788	-0.79851	0.424575	0.983944	169.676	0.273354	0.315625	0.866072	0.386451	0.923864	154.534	0.044684	0.18158	0.246085	0.805617	0.957029
ENSSSCG00000002041	SLC7A7	476.246	0.441045	0.170332	2.58933	0.00961638	0.0715031	341.98	0.0876383	0.262428	0.333952	0.738416	0.995655	445.569	0.605872	0.24866	2.43655	0.014828	0.403292	391.209	0.380978	0.186871	2.03872	0.0414783	0.327231
ENSSSCG00000002042	OXA1L	8145.9	0.205018	0.13275	1.54439	0.122493	0.346751	7975.11	0.0333886	0.201299	0.165865	0.868263	0.998795	7400.32	0.476392	0.285365	1.66941	0.0950354	0.718625	7700.17	0.231703	0.18437	1.25673	0.208852	0.631325
ENSSSCG00000002045		8378.04	0.250651	0.108487	2.31043	0.0208643	0.12022	8144.46	0.138616	0.203594	0.680846	0.495969	0.989825	8230.13	0.282454	0.202418	1.3954	0.162896	0.811098	8183.39	0.204033	0.137679	1.48195	0.138353	0.54304
ENSSSCG00000002050	DAD1	671.006	-0.0561097	0.109028	-0.514635	0.606808	0.797814	623.645	-0.0314667	0.229949	-0.136842	0.891156	0.998795	748.624	-0.241465	0.203985	-1.18374	0.236516	0.875585	682.878	-0.144524	0.150517	-0.960187	0.336961	0.739402
ENSSSCG00000002051	ABHD4	50.8438	-0.256954	0.258124	-0.995465	0.31951	0.583701	33.9582	-0.138815	0.612824	-0.226517	0.8208	0.99681	50.928	-0.301587	0.41766	-0.722087	0.470241	0.949076	42.0145	-0.208997	0.331209	-0.631014	0.528031	0.849309
ENSSSCG00000002077		53.4902	0.184756	0.23413	0.789117	0.430044	0.674671	46.1292	-0.199014	0.488652	-0.407271	0.683809	0.995655	50.149	0.845611	0.54844	1.54185	0.123111	0.766875	48.0357	0.280297	0.409807	0.683973	0.493992	0.835324
ENSSSCG00000002078		28.4404	0.258587	0.280616	0.921499	0.35679	0.615496	17.9009	-0.0733496	0.688506	-0.106534	0.915158	0.998795	30.2008	0.296849	0.667564	0.444675	0.656554	0.977132	23.7514	0.147617	0.433447	0.340565	0.733431	0.936116
ENSSSCG00000002081		27.3099	0.389284	0.3573	1.08952	0.275927	0.541764	18.4755	0.0591674	0.734311	0.0805754	0.93578	0.998795	32.9143	0.402995	0.981586	0.410555	0.681399	0.979182	25.3345	0.238821	0.632652	0.377492	0.705808	0.926119
ENSSSCG00000002099		163.247	0.36303	0.192946	1.88151	0.0599027	0.227069	134.769	0.260323	0.339939	0.765794	0.443799	0.986464	168.346	0.133855	0.451119	0.296718	0.766682	0.985988	150.722	0.197161	0.260521	0.756795	0.449173	0.809817
ENSSSCG00000002127	CHD8	5412.98	-0.0777944	0.0672098	-1.15748	0.247074	0.512787	4522.36	-0.0676796	0.179904	-0.376199	0.706769	0.995655	5379.48	-0.128407	0.28561	-0.449589	0.653007	0.977132	4928.79	-0.0978499	0.149245	-0.655631	0.512061	0.844041
ENSSSCG00000002135	PNP	2451.11	0.304031	0.39223	0.775136	0.438259	0.680646	1469.59	0.0237265	0.162213	0.146268	0.88371	0.998795	3013.73	1.03409	0.367467	2.81411	0.00489122	0.265215	2203.77	0.654045	0.366546	1.78435	0.0743672	0.42886
ENSSSCG00000002138	OSGEP	404.84	-0.358028	0.115618	-3.09663	0.00195733	0.0244649	360.67	-0.32061	0.230502	-1.39092	0.16425	0.868172	376.871	-0.388432	0.256113	-1.51665	0.129356	0.774788	368.238	-0.351748	0.160236	-2.19518	0.0281503	0.272608
ENSSSCG00000002142	TEP1	1123.22	0.0400683	0.102423	0.391205	0.695646	0.848824	815.01	0.0569654	0.164291	0.346735	0.728791	0.995655	939.533	0.0989416	0.264017	0.374755	0.707842	0.981374	874.081	0.0781435	0.133753	0.584237	0.559061	0.866609
ENSSSCG00000002143	PARP2	555.884	-0.0585288	0.107161	-0.546176	0.584945	0.783536	551.48	0.0556523	0.324664	0.171415	0.863898	0.998795	737.369	0.0612131	0.249367	0.245474	0.806089	0.988618	639.766	0.05845	0.219521	0.266262	0.790038	0.953123
ENSSSCG00000002144	CCNB1IP1	1609.62	-0.22709	0.120762	-1.88047	0.0600437	0.227216	1614.52	-0.378833	0.20448	-1.85267	0.0639302	0.663556	1963.57	-0.0455107	0.245542	-0.185348	0.852956	0.99083	1780.25	-0.207251	0.147224	-1.40773	0.15921	0.575558
ENSSSCG00000002145	TTC5	121.523	-0.146823	0.135359	-1.08469	0.278057	0.543781	118.508	0.0406968	0.263378	0.154519	0.877201	0.998795	129.803	-0.14169	0.439881	-0.322109	0.74737	0.983832	123.848	-0.0457149	0.209943	-0.217749	0.827625	0.965074
ENSSSCG00000002235	LPCAT4	357.952	-0.0440668	0.120857	-0.364619	0.715396	0.860854	259.097	0.0647543	0.237686	0.272437	0.785286	0.995655	277.256	-0.11393	0.415538	-0.274174	0.783951	0.988045	267.657	-0.0222565	0.211517	-0.105223	0.916199	0.986924
ENSSSCG00000002243	SLC12A6	6376.45	-0.0726743	0.0642506	-1.13111	0.25801	0.523649	5201.56	-0.143031	0.150655	-0.949394	0.34242	0.967942	6444.02	0.0291267	0.170021	0.171312	0.863978	0.99083	5791.46	-0.0480876	0.113882	-0.422258	0.672837	0.913295
ENSSSCG00000002245	KATNBL1	782.56	0.145392	0.0866502	1.67792	0.0933626	0.295652	704.72	0.0336529	0.253326	0.132844	0.894317	0.998795	719.715	0.186298	0.257165	0.724428	0.468803	0.949076	711.668	0.107442	0.160351	0.670042	0.502831	0.839318
ENSSSCG00000002252	ARRDC4	2174.56	0.944669	0.272301	3.46921	0.000521985	0.00958724	2375.62	1.29088	0.292092	4.41945	9.89547e-06	0.00226254	2016.36	0.906637	0.446196	2.03193	0.0421612	0.581648	2204.35	1.136	0.279055	4.07089	4.6833e-05	0.00489278
ENSSSCG00000002257	MCTP2	765.282	0.548363	0.222835	2.46085	0.0138609	0.0920466	627.856	0.358555	0.326621	1.09777	0.272305	0.952738	729.228	0.95857	0.233825	4.09952	4.1401e-05	0.0174531	676.016	0.658401	0.210452	3.1285	0.00175699	0.0563148
ENSSSCG00000002259		8551.59	-0.00520777	0.0880832	-0.0591233	0.952854	0.976474	6397.75	-0.0803015	0.182809	-0.439264	0.66047	0.995655	7537.04	0.102514	0.189703	0.54039	0.588928	0.966821	6938.58	0.0150642	0.108186	0.139244	0.889257	0.980162
ENSSSCG00000002260		741.062	-0.0705806	0.123485	-0.571572	0.567612	0.771458	592.806	-0.203413	0.219771	-0.925565	0.354672	0.967942	654.613	0.0125988	0.250316	0.0503314	0.959858	0.998416	622.115	-0.0951428	0.137582	-0.691536	0.489229	0.833123
ENSSSCG00000002263	SLCO3A1	650.639	-0.0793026	0.114524	-0.692451	0.488654	0.718558	364.38	0.173156	0.24484	0.707222	0.479429	0.98867	628.307	-0.232951	0.232213	-1.00318	0.315774	0.911283	489.873	-0.0686936	0.214298	-0.320552	0.74855	0.941155
ENSSSCG00000002266		15186.6	-0.0846126	0.102149	-0.828326	0.407486	0.657987	14156	-0.112963	0.183813	-0.614554	0.538849	0.993215	17860.2	0.169964	0.199881	0.850326	0.395144	0.927011	15915.3	0.0384444	0.129834	0.296104	0.767151	0.947069
ENSSSCG00000002268	AKAP5	148.436	-0.126639	0.183193	-0.691284	0.489387	0.718573	139.363	0.0064243	0.29915	0.0214752	0.982867	0.998917	156.793	-0.470235	0.313524	-1.49984	0.133656	0.778918	147.599	-0.213108	0.257571	-0.827376	0.408024	0.7869
ENSSSCG00000002269	MTHFD1	1217.83	-0.00589236	0.130984	-0.0449853	0.964119	0.981983	1212.35	0.22582	0.18664	1.20992	0.226309	0.926648	1161.66	-0.427055	0.266254	-1.60394	0.108728	0.741525	1187.8	-0.0753684	0.177517	-0.424571	0.671149	0.912354
ENSSSCG00000002276	PLEKHG3	867.655	-0.0104743	0.175867	-0.0595583	0.952507	0.976474	715.308	0.101239	0.203802	0.496753	0.619363	0.99491	796.684	-0.088904	0.419564	-0.211896	0.832188	0.989698	753.823	0.0243543	0.221147	0.110127	0.912309	0.985809
ENSSSCG00000002277	SPTB	17434.1	0.100803	0.193461	0.52105	0.602332	0.794843	15418.5	-0.117327	0.20926	-0.560676	0.575018	0.993215	13770.5	0.729891	0.422991	1.72555	0.0844287	0.7103	14632	0.255772	0.269847	0.947838	0.343212	0.744042
ENSSSCG00000002280	RAB15	20.8828	-0.551155	0.32818	-1.67943	0.0930679	0.295034	20.8213	-0.688865	0.627883	-1.09712	0.272588	0.952738	27.9219	-0.821555	0.864421	-0.95041	0.341904	0.915486	24.1776	-0.823083	0.497873	-1.6532	0.0982903	0.487181
ENSSSCG00000002281		222.521	-0.0599779	0.12721	-0.471486	0.637294	0.814434	170.465	-0.176659	0.37859	-0.466622	0.64077	0.995655	208.795	-0.0707669	0.404605	-0.174904	0.861155	0.99083	188.659	-0.116727	0.258117	-0.452222	0.651109	0.904871
ENSSSCG00000002283	FUT8	1619.37	0.00858774	0.148184	0.0579532	0.953786	0.97682	1450.3	0.121454	0.175052	0.693815	0.487798	0.988754	1839.16	-0.42927	0.277948	-1.54443	0.122485	0.766385	1634.8	-0.17339	0.171184	-1.01289	0.311112	0.721661
ENSSSCG00000002285	GPHN	182.593	-0.214799	0.17067	-1.25856	0.208188	0.468123	134.358	-0.330974	0.353323	-0.936747	0.348889	0.967942	192.027	-0.514853	0.342581	-1.50286	0.132874	0.777138	161.738	-0.438553	0.239644	-1.83002	0.0672475	0.409414
ENSSSCG00000002287	MPP5	216.33	-0.36918	0.152778	-2.41645	0.0156727	0.0996807	180.027	-0.332104	0.264839	-1.25398	0.209848	0.913471	246.702	-0.166703	0.324564	-0.51362	0.607518	0.967921	211.689	-0.245306	0.203104	-1.20779	0.227128	0.647075
ENSSSCG00000002290	PLEK2	303.114	0.052028	0.177487	0.293137	0.769418	0.889272	236.105	0.069984	0.269511	0.25967	0.795118	0.995655	352.392	0.589435	0.317066	1.85903	0.0630227	0.654621	291.407	0.347857	0.243191	1.43039	0.152607	0.563782
ENSSSCG00000002292	PLEKHH1	1146.42	-0.0298102	0.151132	-0.197246	0.843635	0.92671	768.701	0.229992	0.240938	0.954572	0.339794	0.967942	1169.83	-0.0430784	0.383201	-0.112417	0.910493	0.994685	959.475	0.0276519	0.269429	0.102631	0.918255	0.987026
ENSSSCG00000002294	ARG2	321.672	0.789804	0.276077	2.86081	0.00422561	0.0419912	202.337	0.610938	0.352929	1.73105	0.0834425	0.71834	385.728	1.53063	0.431692	3.54566	0.00039163	0.0644279	289.584	1.17264	0.333769	3.51334	0.000442518	0.0235724
ENSSSCG00000002295	VTI1B	778.615	-0.0635438	0.0985269	-0.644939	0.518967	0.740206	670.227	0.00205271	0.205654	0.0099814	0.992036	0.999052	771.894	0.0185495	0.208203	0.0890935	0.929008	0.997528	718.412	0.0112239	0.122222	0.0918324	0.926831	0.989063
ENSSSCG00000002296		672.473	-0.202605	0.149727	-1.35316	0.176004	0.426431	570.074	-0.141146	0.205217	-0.687788	0.491586	0.989825	764.944	-0.316677	0.363245	-0.871801	0.383317	0.9223	662.51	-0.228626	0.204652	-1.11715	0.263931	0.680114
ENSSSCG00000002298	ZFYVE26	1200.34	-0.0645759	0.0999881	-0.645836	0.518386	0.739651	860.798	0.0205947	0.187055	0.110099	0.91233	0.998795	959.709	-0.121165	0.250605	-0.483489	0.628749	0.974383	907.67	-0.048602	0.123896	-0.39228	0.694851	0.923224
ENSSSCG00000002305	EXD2	227.619	-0.0816087	0.144614	-0.564322	0.572535	0.775382	159.917	0.0427262	0.315239	0.135536	0.892188	0.998795	224.338	-0.377719	0.263529	-1.43331	0.15177	0.807428	190.528	-0.192222	0.201478	-0.95406	0.340053	0.74181
ENSSSCG00000002307	ERH	595.467	-0.0252278	0.124835	-0.20209	0.839847	0.925262	533.935	0.0621539	0.218172	0.284885	0.775732	0.995655	588.164	-0.186833	0.260563	-0.717035	0.473352	0.950793	559.552	-0.0677364	0.145867	-0.464372	0.642382	0.90275
ENSSSCG00000002311	SUSD6	2904.07	0.307693	0.143184	2.14892	0.0316404	0.154501	2062.7	0.190781	0.231783	0.823102	0.41045	0.983944	2067.31	0.555907	0.216075	2.57275	0.0100893	0.351766	2064.47	0.371592	0.153943	2.41383	0.0157859	0.198785
ENSSSCG00000002315	SLC8A3	45.056	-0.138295	0.280823	-0.492462	0.622392	0.807306	8.54119	-1.22764	1.0171	-1.20701	0.227429	0.926895	66.8997	-0.120787	0.625694	-0.193045	0.846923	0.99083	36.3116	-0.295995	0.780722	-0.37913	0.704591	0.925767
ENSSSCG00000002316	COX16	56.6102	0.235859	0.192468	1.22545	0.220406	0.482719	51.1358	0.300681	0.407173	0.73846	0.460235	0.98867	54.6805	0.0903661	0.460353	0.196297	0.844377	0.99083	52.8079	0.145801	0.256273	0.568928	0.569405	0.871646
ENSSSCG00000002329	MAP3K9	340.28	-0.199984	0.202078	-0.989638	0.322351	0.586482	251.183	-0.608351	0.288462	-2.10895	0.0349489	0.522955	245.592	0.330334	0.277965	1.1884	0.234676	0.875585	248.486	-0.153404	0.220802	-0.69476	0.487206	0.832413
ENSSSCG00000002330	PCNX1	4116.89	0.104791	0.146279	0.716378	0.473758	0.708853	3224.07	-0.0239039	0.234487	-0.101941	0.918803	0.998795	4214.1	0.290253	0.237811	1.22052	0.222267	0.866084	3694.62	0.152799	0.17613	0.867538	0.385647	0.773303
ENSSSCG00000002332	SIPA1L1	1869.24	-0.0351277	0.121401	-0.289353	0.772311	0.890321	1411.62	0.147931	0.250639	0.590214	0.555047	0.993215	1571.85	-0.043007	0.180333	-0.238487	0.811503	0.988618	1487.56	0.0531609	0.139593	0.380828	0.703331	0.925482
ENSSSCG00000002333	DPF3	261.43	-0.440517	0.117094	-3.76207	0.000168511	0.00421783	212.791	-0.429882	0.289553	-1.48464	0.13764	0.835249	239.005	-0.472503	0.3052	-1.54818	0.12158	0.763951	225.187	-0.439447	0.193446	-2.27168	0.0231059	0.247928
ENSSSCG00000002337	ZFYVE1	705.272	0.146402	0.092778	1.57798	0.114571	0.333398	573.726	0.185457	0.180167	1.02936	0.303308	0.960992	683.828	0.134695	0.207414	0.6494	0.51608	0.958922	625.978	0.156765	0.0992973	1.57875	0.114394	0.507927
ENSSSCG00000002340	PSEN1	2060.09	0.176796	0.104321	1.69474	0.0901251	0.289039	1675.25	0.112	0.163517	0.684944	0.493379	0.989825	2016.45	0.237662	0.234785	1.01225	0.311417	0.909903	1837.18	0.179373	0.126049	1.42305	0.154723	0.567401
ENSSSCG00000002344	RIOX1	573.49	0.0375648	0.106506	0.3527	0.724313	0.866339	489.932	0.137603	0.217621	0.632304	0.527188	0.993041	521.801	0.0372263	0.24415	0.152474	0.878813	0.99083	504.95	0.0853653	0.139951	0.609963	0.541886	0.857361
ENSSSCG00000002349	ACOT4	207.982	-0.278678	0.156072	-1.78557	0.0741689	0.257935	190.6	-0.208542	0.275858	-0.755975	0.449664	0.988535	189.332	-0.312738	0.543409	-0.575512	0.564945	0.964819	189.91	-0.252256	0.29293	-0.861147	0.389157	0.775839
ENSSSCG00000002350	ELMSAN1	2742.94	-0.295567	0.139314	-2.12158	0.0338727	0.160859	2128.12	-0.17761	0.217639	-0.816075	0.414457	0.983944	1884.47	-0.0680122	0.220386	-0.308605	0.757622	0.984862	2011.73	-0.129401	0.153812	-0.841293	0.400184	0.781474
ENSSSCG00000002351		29.5952	-0.00679555	0.313871	-0.0216507	0.982727	0.990351	33.8861	0.568496	0.484798	1.17265	0.240938	0.933979	29.3155	-0.192948	0.531995	-0.362687	0.716838	0.983197	31.6979	0.227378	0.300425	0.756853	0.449138	0.809817
ENSSSCG00000002352	ZNF410	479.342	-0.108532	0.0868462	-1.2497	0.211408	0.472585	408.656	-0.174427	0.196686	-0.886827	0.375172	0.97422	468.703	-0.0328008	0.215138	-0.152464	0.878821	0.99083	437.098	-0.0984683	0.102099	-0.964439	0.334826	0.738344
ENSSSCG00000002354	COQ6	97.3093	0.0385202	0.168642	0.228414	0.819324	0.914393	96.0782	0.0640175	0.370947	0.172579	0.862983	0.998795	94.9853	-0.0356789	0.543526	-0.0656435	0.947662	0.998416	95.5197	0.0201221	0.298417	0.0674296	0.94624	0.992488
ENSSSCG00000002355	ENTPD5	110.448	-0.291617	0.167404	-1.742	0.0815084	0.272842	76.7671	-0.484752	0.370813	-1.30727	0.191121	0.901207	100.082	-0.382178	0.345026	-1.10768	0.268001	0.895993	87.8406	-0.402783	0.217941	-1.84813	0.0645832	0.403291
ENSSSCG00000002357	ALDH6A1	164.495	-0.0788007	0.164303	-0.479607	0.631507	0.811802	136.214	-0.0972743	0.330624	-0.294214	0.768595	0.995655	154.939	-0.381597	0.297176	-1.28408	0.199115	0.843349	145.081	-0.242763	0.187121	-1.29736	0.194508	0.616496
ENSSSCG00000002366	NPC2	1709.63	0.338698	0.147974	2.28891	0.0220848	0.124561	1695.88	0.153733	0.231364	0.664463	0.506394	0.989825	1737.42	0.00996017	0.256566	0.038821	0.969033	0.998768	1715.27	0.0779471	0.172044	0.453066	0.650501	0.904793
ENSSSCG00000002367	ISCA2	165.808	-0.126996	0.125803	-1.00948	0.312744	0.57768	162.663	-0.161293	0.269884	-0.597639	0.550081	0.993215	145.816	-0.0233706	0.332241	-0.0703423	0.943921	0.998416	154.595	-0.0950141	0.190707	-0.498221	0.618328	0.893747
ENSSSCG00000002368	LTBP2	58.8978	-0.332849	0.248856	-1.33752	0.181054	0.433916	52.7438	-0.264906	0.373366	-0.709508	0.478009	0.98867	57.8813	-0.31003	0.605797	-0.511772	0.60881	0.967921	55.1865	-0.364522	0.394337	-0.924391	0.355283	0.751818
ENSSSCG00000002370	AREL1	1576	0.21859	0.102114	2.14065	0.0323024	0.156697	1317.72	0.318032	0.205422	1.54819	0.121576	0.80807	1359.91	0.236653	0.199274	1.18758	0.235	0.875585	1337.5	0.281241	0.115127	2.44288	0.0145706	0.19102
ENSSSCG00000002372	YLPM1	1776.8	-0.151777	0.157324	-0.964742	0.334674	0.596315	1169.29	-0.134442	0.262749	-0.511674	0.60888	0.994088	1212.49	-0.172521	0.31959	-0.53982	0.589321	0.966821	1189.6	-0.153953	0.195654	-0.786866	0.43136	0.801086
ENSSSCG00000002374	DLST	1569.26	0.105621	0.0914018	1.15556	0.247859	0.513503	1319.81	0.0611164	0.162597	0.375877	0.707008	0.995655	1393.04	0.0108724	0.226079	0.0480913	0.961643	0.998505	1354.38	0.0386102	0.107206	0.36015	0.718735	0.931372
ENSSSCG00000002375	RPS6KL1	27.5816	-0.512663	0.262245	-1.9549	0.0505952	0.206601	31.3106	-1.16623	0.603161	-1.93354	0.0531701	0.614733	21.8183	-0.358896	0.64974	-0.552369	0.580696	0.966659	26.7829	-0.912463	0.461986	-1.97509	0.0482584	0.351366
ENSSSCG00000002377	EIF2B2	807.169	0.0841494	0.107385	0.783626	0.43326	0.676912	789.68	0.0103603	0.210401	0.0492406	0.960728	0.998818	729.774	0.0625168	0.2437	0.256532	0.79754	0.988618	760.929	0.0323052	0.153221	0.21084	0.833012	0.966885
ENSSSCG00000002378	MLH3	421.975	-0.176144	0.131236	-1.3422	0.179531	0.431328	360.298	-0.0255126	0.217266	-0.117425	0.906523	0.998795	451.216	-0.132456	0.326181	-0.406082	0.684682	0.979182	403.467	-0.0791421	0.176929	-0.447311	0.654651	0.905801
ENSSSCG00000002379	ACYP1	33.2246	-0.101168	0.215061	-0.470414	0.638059	0.814871	29.7747	0.303308	0.502804	0.603234	0.546353	0.993215	30.2634	-0.126305	0.481164	-0.262498	0.792937	0.988618	30.0003	0.0711461	0.25996	0.273681	0.78433	0.950743
ENSSSCG00000002381	NEK9	2825.68	-0.0793699	0.0716832	-1.10723	0.268194	0.533857	2077.45	-0.0414302	0.158772	-0.260942	0.794137	0.995655	2386.21	-0.122789	0.2623	-0.468125	0.639695	0.976787	2223.79	-0.0814777	0.124646	-0.653674	0.513322	0.844478
ENSSSCG00000002383	FOS	2211.03	0.560899	0.236534	2.37133	0.0177243	0.107781	1739.57	-0.101443	0.282714	-0.358819	0.719731	0.995655	1883.14	1.38286	0.29162	4.74199	2.11625e-06	0.00217343	1807.54	0.613101	0.316604	1.93649	0.0528071	0.367255
ENSSSCG00000002385	TGFB3	11.3542	-0.864299	0.467785	-1.84764	0.0646544	0.2375	9.59142	-1.09409	1.05299	-1.03904	0.298788	0.960992	10.0362	-1.01141	0.974624	-1.03774	0.299391	0.903854	9.79694	-1.04828	0.643317	-1.6295	0.103208	0.493556
ENSSSCG00000002386		31.0324	-0.0945861	0.297872	-0.31754	0.750834	0.880968	34.4255	-0.179552	0.56729	-0.316508	0.751617	0.995655	29.7755	-0.20231	0.507137	-0.398927	0.689947	0.979182	32.2003	-0.166011	0.324066	-0.512275	0.608458	0.888814
ENSSSCG00000002387	GPATCH2L	503.424	-0.0973786	0.0864909	-1.12588	0.260215	0.524761	433.92	-0.271348	0.187323	-1.44855	0.147462	0.846799	496.813	0.043179	0.22989	0.187824	0.851014	0.99083	463.719	-0.108143	0.113213	-0.955212	0.339471	0.741739
ENSSSCG00000002389	VASH1	313.105	0.0750867	0.10656	0.704642	0.481033	0.712983	321.145	-0.0575042	0.31821	-0.180711	0.856594	0.998795	327.774	0.0906099	0.416211	0.217702	0.827662	0.989698	324.216	0.017614	0.250539	0.0703043	0.943951	0.992442
ENSSSCG00000002390	ANGEL1	227.119	0.0258016	0.166921	0.154573	0.877158	0.942986	186.887	0.126671	0.299996	0.422243	0.672848	0.995655	179.508	0.0182153	0.3407	0.0534645	0.957362	0.998416	183.342	0.0788638	0.204859	0.384967	0.700262	0.923675
ENSSSCG00000002392		358.012	0.178333	0.14975	1.19088	0.233703	0.498316	218.563	0.0110743	0.268679	0.0412175	0.967122	0.998818	244.04	0.548921	0.306025	1.79372	0.0728587	0.682083	230.631	0.274663	0.180092	1.52513	0.127227	0.52678
ENSSSCG00000002396	GSTZ1	156.936	-0.233102	0.141068	-1.6524	0.0984528	0.304332	143.909	0.135445	0.262702	0.515583	0.606146	0.994088	180.155	-0.518476	0.270882	-1.91403	0.0556168	0.635803	161.115	-0.222673	0.191385	-1.16348	0.244633	0.663957
ENSSSCG00000002397	POMT2	277.962	-0.209239	0.13129	-1.59371	0.111	0.327323	214.937	0.0813728	0.217198	0.374649	0.707922	0.995655	263.858	-0.238793	0.34825	-0.685696	0.492905	0.95501	238.167	-0.0846736	0.179993	-0.470428	0.638049	0.901994
ENSSSCG00000002400		34.83	-0.989414	0.295309	-3.35044	0.000806833	0.0130862	41.8811	-0.674521	0.487078	-1.38483	0.166104	0.871822	36.0385	-1.04053	0.646004	-1.61072	0.10724	0.73981	39.0968	-0.787602	0.369959	-2.12889	0.0332633	0.293191
ENSSSCG00000002403	VIPAS39	216.545	-0.0244721	0.130362	-0.187723	0.851094	0.930694	229.733	0.0758455	0.262516	0.288918	0.772644	0.995655	225.353	-0.193441	0.309968	-0.624067	0.532583	0.962346	227.589	-0.0420057	0.181968	-0.23084	0.817439	0.961563
ENSSSCG00000002404	SPTLC2	3463.01	0.357252	0.10029	3.5622	0.00036776	0.00745243	2834.25	0.244087	0.146884	1.66177	0.0965581	0.757465	3236.72	0.250814	0.208631	1.20219	0.22929	0.872039	3025.21	0.249699	0.103059	2.42287	0.0153984	0.195688
ENSSSCG00000002406	AHSA1	1872.72	-0.213917	0.110658	-1.93314	0.0532195	0.213198	1721.4	-0.343566	0.182415	-1.88343	0.059642	0.647244	1735.39	0.0267276	0.201011	0.132966	0.89422	0.991958	1727.65	-0.166542	0.124064	-1.34239	0.179469	0.599409
ENSSSCG00000002408	ADCK1	123.37	0.184159	0.160558	1.147	0.251383	0.516279	83.4171	0.305172	0.358862	0.850389	0.395109	0.98314	102.15	0.0198723	0.351049	0.0566085	0.954857	0.998416	92.3095	0.147279	0.202034	0.728982	0.466013	0.819646
ENSSSCG00000002410	CEP128	2409.71	0.0794936	0.115268	0.689639	0.490421	0.718875	2846.67	0.0363922	0.214063	0.170007	0.865005	0.998795	3313.6	0.425222	0.258003	1.64813	0.0993265	0.727536	3068.24	0.226982	0.171496	1.32354	0.185655	0.605003
ENSSSCG00000002411	GTF2A1	1414.86	0.0534961	0.0803561	0.665738	0.505579	0.73042	1311.89	0.0738853	0.168489	0.438517	0.661011	0.995655	1569.95	0.0781225	0.217746	0.358778	0.719761	0.983197	1434.26	0.0736403	0.108606	0.678049	0.49774	0.836438
ENSSSCG00000002412	STON2	701.435	0.233325	0.205717	1.13421	0.256708	0.522678	512.494	0.138285	0.279497	0.494765	0.620766	0.99491	757.474	-0.277894	0.317784	-0.874475	0.38186	0.9223	628.981	-0.102939	0.22975	-0.448048	0.654118	0.905801
ENSSSCG00000002414	SEL1L	1504.77	-0.105932	0.0837873	-1.2643	0.206122	0.46505	1172.96	-0.228029	0.171961	-1.32605	0.184822	0.899939	1294.75	-0.0372605	0.219607	-0.169669	0.86527	0.99083	1230.68	-0.131207	0.106685	-1.22985	0.218753	0.640144
ENSSSCG00000002424	SPATA7	39.6915	-0.0717753	0.215545	-0.332995	0.739138	0.8741	41.0116	0.211419	0.432781	0.488513	0.625186	0.995017	39.2162	-0.106375	0.496298	-0.214336	0.830285	0.989698	40.1505	0.0315232	0.272246	0.115789	0.907819	0.985158
ENSSSCG00000002426	ZC3H14	3302.86	-0.0547131	0.0721309	-0.758525	0.448137	0.687673	3056.43	-0.0942081	0.156578	-0.60167	0.547394	0.993215	3681.69	-0.113068	0.189659	-0.596164	0.551066	0.96456	3352.97	-0.110357	0.126112	-0.875068	0.381537	0.771113
ENSSSCG00000002429	FOXN3	2508.94	-0.139384	0.0732573	-1.90266	0.0570849	0.220779	1988.55	-0.176203	0.166592	-1.05769	0.290196	0.960579	2139.23	-0.136206	0.220445	-0.617869	0.536662	0.962346	2059.6	-0.15346	0.101428	-1.51299	0.130281	0.532524
ENSSSCG00000002430	EFCAB11	105.952	0.0431604	0.181053	0.238386	0.811582	0.910832	95.5417	0.306147	0.356569	0.858591	0.390566	0.982155	113.103	-0.00263254	0.3148	-0.00836259	0.993328	0.999327	103.865	0.142679	0.194241	0.734547	0.462615	0.817769
ENSSSCG00000002431	TDP1	237.135	0.160043	0.142526	1.1229	0.261481	0.525963	210.733	0.143695	0.250237	0.574234	0.565809	0.993215	253.213	0.0546234	0.275123	0.198541	0.842621	0.99083	230.866	0.106673	0.159333	0.6695	0.503176	0.839519
ENSSSCG00000002433	PSMC1	1182.15	-0.246272	0.0959503	-2.56666	0.0102683	0.0746766	1141.46	-0.368595	0.167198	-2.20454	0.0274864	0.467949	1155.38	-0.182083	0.196283	-0.927654	0.353587	0.920068	1147.71	-0.276845	0.101396	-2.73032	0.00632722	0.116811
ENSSSCG00000002434	NRDE2	918.288	-0.29104	0.0845535	-3.44208	0.000577257	0.0103421	758.821	-0.271779	0.17868	-1.52104	0.128249	0.817234	858.729	-0.175368	0.298639	-0.587223	0.557054	0.96456	806.114	-0.218752	0.145836	-1.49999	0.133617	0.536171
ENSSSCG00000002436	TTC7B	1932.77	0.350313	0.261846	1.33786	0.180941	0.433738	1248.17	0.0451708	0.187999	0.240271	0.81012	0.996517	1736.35	-0.142722	0.34714	-0.411137	0.680972	0.979182	1480.29	-0.0620516	0.198703	-0.312284	0.754825	0.944238
ENSSSCG00000002440	CCDC88C	2414.86	-0.196344	0.102496	-1.91563	0.0554116	0.217197	2021.87	-0.201939	0.158895	-1.27089	0.203767	0.908321	1968.36	0.0526517	0.221454	0.237755	0.812071	0.988618	1995.88	-0.0797208	0.123332	-0.646392	0.518026	0.84554
ENSSSCG00000002441	PPP4R3A	5291.1	-0.126021	0.0620472	-2.03105	0.0422502	0.185189	4305.13	-0.14409	0.167066	-0.862477	0.388425	0.979551	5001.79	-0.0979177	0.212966	-0.459781	0.645674	0.976787	4635.43	-0.123141	0.112537	-1.09422	0.273857	0.689091
ENSSSCG00000002443	TC2N	530.921	0.548701	0.238241	2.30314	0.0212712	0.121686	434.28	0.495637	0.320061	1.54857	0.121485	0.80807	466.124	0.442875	0.440766	1.00479	0.315	0.911283	449.401	0.427457	0.275283	1.55279	0.120473	0.519165
ENSSSCG00000002445	TRIP11	993.11	0.132883	0.108868	1.22058	0.222245	0.485333	934.086	0.0449148	0.210242	0.213634	0.830832	0.997591	1121.56	0.161528	0.187263	0.862574	0.388372	0.923864	1023.07	0.106286	0.115944	0.916702	0.359299	0.754835
ENSSSCG00000002446		1070.7	-0.0906959	0.101404	-0.894406	0.371105	0.628271	915.014	-0.0759382	0.204341	-0.371624	0.710173	0.995655	1162.53	0.105073	0.2542	0.413346	0.679353	0.979182	1032.51	0.0216701	0.157954	0.137193	0.890879	0.980216
ENSSSCG00000002447	CPSF2	2036.64	-0.0603976	0.0991923	-0.608894	0.542595	0.756327	1903.23	-0.0651901	0.182995	-0.356241	0.72166	0.995655	2072.17	0.131648	0.25211	0.522186	0.601541	0.967434	1983.12	0.031549	0.12895	0.244661	0.806719	0.95729
ENSSSCG00000002449		324.741	0.193566	0.128907	1.5016	0.133202	0.363446	319.639	-0.0775966	0.202462	-0.383264	0.701524	0.995655	333.711	0.404494	0.435215	0.92941	0.352677	0.920068	326.289	0.153599	0.231006	0.664913	0.506106	0.841344
ENSSSCG00000002450	SLC24A4	53.6214	-0.111007	0.184315	-0.602267	0.546996	0.759369	35.9949	-0.0913392	0.524337	-0.174199	0.861709	0.998795	47.252	0.139807	0.4219	0.331374	0.740362	0.983405	41.3415	0.0413812	0.280647	0.147449	0.882778	0.979118
ENSSSCG00000002451	RIN3	1291.77	0.0149732	0.144108	0.103903	0.917247	0.961888	803.721	-0.269803	0.217127	-1.2426	0.214014	0.917358	729.207	0.39233	0.249077	1.57514	0.115225	0.751745	768.069	0.0394512	0.180841	0.218154	0.827309	0.964962
ENSSSCG00000002452	LGMN	685.299	0.997494	0.112072	8.90045	5.56195e-19	1.85157e-15	583.037	0.809661	0.193745	4.17901	2.92781e-05	0.00548558	751.2	1.0388	0.288319	3.60296	0.000314609	0.0589454	662.952	0.929594	0.156319	5.94677	2.73481e-09	3.07142e-06
ENSSSCG00000002455	GOLGA5	1054.76	-0.017048	0.0844712	-0.201821	0.840057	0.925262	1055.08	0.111901	0.157163	0.712002	0.476464	0.98867	1195.97	-0.0213232	0.203151	-0.104962	0.916406	0.995436	1121.82	0.0500997	0.0990422	0.505842	0.612967	0.890356
ENSSSCG00000002457	ITPK1	625.565	0.0165879	0.113269	0.146447	0.883569	0.946582	542.063	-0.124869	0.175985	-0.709544	0.477987	0.98867	523.741	0.033822	0.278832	0.121299	0.903454	0.993328	533.243	-0.0489769	0.142793	-0.342993	0.731604	0.935142
ENSSSCG00000002458	TMEM251	335.752	-0.0588121	0.126087	-0.466441	0.6409	0.81636	297.21	-0.0221083	0.210004	-0.105275	0.916157	0.998795	334.356	0.0371429	0.29124	0.127534	0.898518	0.992395	314.769	0.00712462	0.1497	0.0475926	0.962041	0.994671
ENSSSCG00000002459		153.116	0.0403474	0.133099	0.303138	0.761785	0.885623	168.474	-0.103598	0.319914	-0.323832	0.746065	0.995655	170.245	0.344384	0.265923	1.29505	0.195302	0.839153	169.286	0.111085	0.187532	0.59235	0.553616	0.863352
ENSSSCG00000002460		830.387	-0.085172	0.124527	-0.683962	0.493999	0.721836	759.962	-0.0499087	0.206236	-0.241998	0.808782	0.996517	780.679	-0.260569	0.308523	-0.844569	0.398352	0.928571	769.482	-0.156498	0.179349	-0.872588	0.382887	0.771254
ENSSSCG00000002461	BTBD7	1396.01	-0.157965	0.101779	-1.55203	0.120655	0.344028	1086.01	-0.162485	0.162449	-1.00022	0.317204	0.963758	1364.4	-0.188252	0.191637	-0.982336	0.325935	0.911941	1218.21	-0.174983	0.103165	-1.69614	0.0898586	0.467036
ENSSSCG00000002467	ASB2	16.9694	-0.334431	0.340468	-0.982269	0.325967	0.588772	13.8014	-1.13636	0.777051	-1.46241	0.14363	0.843884	12.2764	-0.32846	0.719251	-0.456669	0.647909	0.977132	13.07	-0.766104	0.427185	-1.79338	0.0729122	0.424425
ENSSSCG00000002469	OTUB2	52.0369	-0.0295845	0.402285	-0.073541	0.941376	0.971189	29.7209	0.117393	0.72119	0.162778	0.870694	0.998795	45.2717	0.639829	0.690641	0.926428	0.354224	0.920068	37.1134	0.380538	0.47734	0.797205	0.425332	0.797246
ENSSSCG00000002470	DDX24	1393.93	-0.275749	0.089624	-3.07673	0.00209285	0.0254972	1218.45	-0.283208	0.201343	-1.4066	0.159547	0.860329	1479.46	-0.411029	0.294469	-1.39583	0.162765	0.811098	1342.08	-0.350153	0.164751	-2.12535	0.0335575	0.294534
ENSSSCG00000002495	SYNE3	2348.63	-0.0377847	0.112979	-0.334441	0.738047	0.873459	1762.13	-0.109384	0.194123	-0.563477	0.57311	0.993215	1934.54	0.175238	0.242173	0.723606	0.469308	0.949076	1843.63	0.0408508	0.147553	0.276855	0.781892	0.949855
ENSSSCG00000002496	GLRX5	3041.33	0.207825	0.14812	1.40309	0.160591	0.404699	3625.99	0.0173552	0.258018	0.0672636	0.946372	0.998795	3171.68	0.709002	0.412492	1.71883	0.0856462	0.710366	3409.06	0.319638	0.270265	1.18268	0.236934	0.656156
ENSSSCG00000002502	ATG2B	1797.43	-0.0970673	0.0727148	-1.3349	0.181908	0.435192	1482.87	-0.0857202	0.160244	-0.534936	0.592694	0.993227	1821.19	-0.129501	0.201921	-0.641342	0.521301	0.9597	1643.52	-0.109305	0.102077	-1.07081	0.284256	0.698343
ENSSSCG00000002504	AK7	19.4245	0.111807	0.421859	0.265033	0.790984	0.899235	15.1424	0.153977	0.872529	0.176473	0.859923	0.998795	20.0262	0.484117	0.87931	0.550564	0.581932	0.966659	17.4629	0.46539	0.561204	0.829271	0.406951	0.785967
ENSSSCG00000002505	PAPOLA	4458.04	0.058216	0.0716112	0.812945	0.41625	0.663568	3986.54	-0.0207741	0.161969	-0.12826	0.897943	0.998795	4824.68	0.132055	0.168909	0.781812	0.434325	0.941017	4384.42	0.0598804	0.0932135	0.6424	0.520613	0.846869
ENSSSCG00000002506	VRK1	2450.27	0.136216	0.0876947	1.5533	0.120352	0.343717	2373.22	0.0196676	0.196638	0.100019	0.920329	0.998795	2808.9	0.309714	0.222807	1.39006	0.164511	0.811247	2580.04	0.17171	0.132054	1.3003	0.193497	0.615909
ENSSSCG00000002507	BCL11B	1068.52	0.2527	0.119246	2.11915	0.034078	0.161489	784.972	0.41662	0.196457	2.12067	0.0339495	0.518342	801.198	0.0555003	0.380693	0.145788	0.884089	0.99083	792.429	0.248526	0.211516	1.17498	0.240003	0.658628
ENSSSCG00000002508	SETD3	3416.52	0.0683162	0.0694543	0.983614	0.325305	0.588315	3006.83	0.0357529	0.145483	0.245754	0.805873	0.995897	3550.36	-0.0270467	0.180157	-0.150128	0.880663	0.99083	3264.77	0.00116754	0.0930027	0.0125538	0.989984	0.998039
ENSSSCG00000002509	CCNK	588.034	-0.120758	0.105466	-1.14499	0.252213	0.517085	363.134	-0.221109	0.229268	-0.964414	0.334839	0.967942	414.792	-0.175397	0.318705	-0.550344	0.582084	0.966659	387.621	-0.197773	0.156528	-1.2635	0.206408	0.629745
ENSSSCG00000002515	SLC25A47	6.07631	0.305893	0.467337	0.654546	0.51276	NA	6.80495	0.567851	0.992677	0.57204	0.567295	NA	4.67832	0.134785	1.20243	0.112094	0.910749	NA	5.79232	0.490405	0.640013	0.766242	0.443532	NA
ENSSSCG00000002516	WARS	2726.04	-0.148052	0.125327	-1.18132	0.237475	0.502453	3244.43	-0.16759	0.239925	-0.698511	0.484857	0.988754	2052.05	-0.184007	0.33623	-0.547264	0.584198	0.966821	2676.54	-0.187898	0.299113	-0.628184	0.529883	0.850148
ENSSSCG00000002517	WDR25	139.913	0.0872631	0.134366	0.649441	0.516053	0.738503	117.669	-0.0493395	0.287746	-0.171469	0.863855	0.998795	122.623	0.173792	0.368897	0.471113	0.63756	0.976453	120.009	0.0583712	0.189157	0.308585	0.757637	0.945013
ENSSSCG00000002520	SLC25A29	57.7671	0.0708285	0.287654	0.246228	0.805506	0.907262	52.1821	0.0369997	0.474974	0.0778985	0.937909	0.998795	63.9507	0.0394775	0.490817	0.0804322	0.935894	0.998093	57.7635	0.0523479	0.337757	0.154987	0.876832	0.977219
ENSSSCG00000002523	CDC42BPB	511.118	0.335124	0.412005	0.813397	0.415991	0.663393	374.073	-0.0863691	0.252499	-0.342057	0.732308	0.995655	495.916	-0.360365	0.32506	-1.10861	0.267598	0.895851	431.988	-0.241352	0.195705	-1.23324	0.217485	0.640144
ENSSSCG00000002525	TRAF3	1493.24	0.198748	0.112205	1.7713	0.0765108	0.262382	1273.44	0.395062	0.17365	2.27505	0.0229027	0.436763	1200.95	0.332928	0.204213	1.6303	0.103038	0.734277	1238.68	0.365213	0.118738	3.0758	0.00209942	0.0612422
ENSSSCG00000002526	RCOR1	1187.71	-0.0733925	0.127423	-0.575974	0.564633	0.770009	762.133	-0.123462	0.185857	-0.664284	0.506509	0.989825	1007.59	-0.151205	0.317091	-0.47685	0.633469	0.975396	878.788	-0.141949	0.174249	-0.814631	0.415283	0.790084
ENSSSCG00000002528		177.375	0.103888	0.113114	0.918436	0.358391	0.616708	146.435	-0.0288215	0.249099	-0.115703	0.907888	0.998795	174.945	0.0534576	0.279805	0.191053	0.848484	0.99083	159.974	0.010512	0.169622	0.0619732	0.950584	0.993058
ENSSSCG00000002529		64246.9	0.33547	0.122045	2.74875	0.00598232	0.0523925	77407.4	0.265472	0.235735	1.12615	0.260103	0.94599	65818.3	0.598014	0.366743	1.63061	0.102974	0.734257	71882.2	0.396055	0.249489	1.58746	0.112408	0.505701
ENSSSCG00000002530	CINP	716.877	0.238907	0.0970889	2.4607	0.0138664	0.0920466	774.88	0.219873	0.178306	1.23313	0.217528	0.920149	745.555	0.331255	0.203787	1.6255	0.104057	0.734891	760.762	0.272629	0.128216	2.12632	0.0334768	0.294534
ENSSSCG00000002532		254.194	-0.174119	0.12718	-1.36908	0.170975	0.419244	243.91	-0.154947	0.262683	-0.589862	0.555283	0.993215	243.566	-0.0436544	0.313319	-0.139329	0.88919	0.991578	243.681	-0.113325	0.181642	-0.62389	0.5327	0.852415
ENSSSCG00000002533	WDR20	425.645	-0.0579069	0.0907944	-0.63778	0.523617	0.743335	383.03	-0.221408	0.276188	-0.801657	0.422751	0.983944	419.1	0.0337913	0.27562	0.122601	0.902423	0.993328	400.096	-0.0947754	0.182739	-0.518638	0.604013	0.887611
ENSSSCG00000002535	HSP90AA1	10343.8	-0.266654	0.08297	-3.21386	0.00130965	0.0184153	8069.79	-0.264834	0.147084	-1.80056	0.0717725	0.687798	9673.53	-0.367483	0.259365	-1.41685	0.156526	0.809912	8829.79	-0.316209	0.125095	-2.52774	0.0114798	0.166002
ENSSSCG00000002540	PPP2R5C	7215.93	0.109819	0.0904406	1.21427	0.224646	0.488269	6338.57	0.0566912	0.180685	0.313757	0.753706	0.995655	7321.66	0.302506	0.172281	1.75589	0.0791079	0.693374	6805.19	0.184296	0.104827	1.7581	0.0787311	0.437657
ENSSSCG00000002544	PPP1R13B	436.199	0.203004	0.149585	1.35711	0.174746	0.425012	279.445	-0.0846668	0.264832	-0.3197	0.749196	0.995655	354.178	0.476804	0.291168	1.63756	0.101515	0.728715	314.947	0.229848	0.206657	1.11222	0.266044	0.682876
ENSSSCG00000002546	XRCC3	71.1083	0.275464	0.206458	1.33424	0.182127	0.43556	65.8074	0.286428	0.374339	0.765158	0.444178	0.986526	59.4116	0.60927	0.445068	1.36894	0.171018	0.81901	62.7469	0.441975	0.266063	1.66117	0.0966797	0.482932
ENSSSCG00000002547		3222.03	-0.00167724	0.0708356	-0.0236779	0.981109	0.989383	2971.46	0.000505217	0.157044	0.00321703	0.997433	0.999052	3209.26	0.0840699	0.189521	0.443592	0.657337	0.977132	3083.93	0.0418844	0.0816943	0.512696	0.608164	0.888732
ENSSSCG00000002554	PLD4	721.131	0.238553	0.13171	1.81119	0.0701114	0.24956	672.044	0.166934	0.179365	0.930696	0.352011	0.967942	556.081	0.258946	0.335543	0.771723	0.440279	0.942472	616.743	0.204302	0.20421	1.00045	0.317093	0.725194
ENSSSCG00000002557	NUDT14	16.2657	0.26248	0.405612	0.647121	0.517553	0.739147	19.466	-0.367372	0.627071	-0.585854	0.557974	0.993215	13.2474	-0.340445	1.08271	-0.314437	0.753189	0.984711	16.5083	-0.277102	0.576466	-0.480692	0.630736	0.899037
ENSSSCG00000002558	CEP170B	38.8419	-0.0158672	0.239972	-0.0661211	0.947281	0.974035	35.0153	0.0409941	0.499028	0.0821478	0.934529	0.998795	23.763	0.459899	0.51748	0.888727	0.37415	0.920068	29.6553	0.207422	0.333913	0.621187	0.534477	0.85315
ENSSSCG00000002559	CDCA4	104.792	-0.303303	0.251918	-1.20398	0.228598	0.492415	85.2416	0.0380005	0.462827	0.0821053	0.934563	0.998795	65.4635	-0.684201	0.486201	-1.40724	0.159357	0.810357	75.8087	-0.225236	0.35606	-0.632578	0.527009	0.849184
ENSSSCG00000002620	EFHC1	185.307	0.237429	0.248964	0.953671	0.34025	0.601536	121.313	0.333942	0.3914	0.8532	0.393548	0.982935	247.888	-0.181437	0.559867	-0.324072	0.745884	0.983832	181.53	0.201703	0.492484	0.409563	0.682126	0.917024
ENSSSCG00000002622	TMEM14A	373.599	-0.149489	0.117623	-1.27092	0.203757	0.461904	358.861	-0.215744	0.276014	-0.781641	0.434426	0.983944	388.493	-0.19504	0.272557	-0.715596	0.474241	0.951327	372.838	-0.203008	0.164993	-1.23041	0.218544	0.640144
ENSSSCG00000002627	GSTA4	663.802	-0.196733	0.11773	-1.67105	0.094712	0.29787	481.054	-0.16994	0.248706	-0.683296	0.49442	0.989825	742.432	-0.329019	0.32831	-1.00216	0.316266	0.911283	605.187	-0.255085	0.254294	-1.00311	0.315808	0.724449
ENSSSCG00000002628	ICK	1470.64	-0.171581	0.104853	-1.6364	0.101756	0.31042	1055.58	-0.196164	0.191981	-1.02179	0.306882	0.960992	1131.31	0.00949119	0.244819	0.0387681	0.969075	0.998768	1091.28	-0.105227	0.226368	-0.46485	0.642039	0.90275
ENSSSCG00000002629	FBXO9	26390.6	0.0550203	0.165786	0.331875	0.739984	0.874329	28572.3	-0.0603945	0.212224	-0.284579	0.775967	0.995655	30363.1	0.582705	0.348106	1.67393	0.0941449	0.718625	29417.2	0.248083	0.233126	1.06416	0.287256	0.700951
ENSSSCG00000002633	GAS8	143.21	0.0480623	0.176581	0.272182	0.785482	0.896962	138.489	-0.189364	0.355879	-0.532103	0.594655	0.993504	140.388	-0.0112329	0.336602	-0.0333715	0.973378	0.998768	139.351	-0.102717	0.21192	-0.484695	0.627893	0.897926
ENSSSCG00000002635	SPIRE2	64.9173	0.425395	0.364838	1.16598	0.243621	0.508552	62.4944	-0.469255	0.452681	-1.03661	0.299916	0.960992	63.0059	-0.139076	0.703717	-0.197631	0.843334	0.99083	62.7387	-0.354827	0.421567	-0.841687	0.399963	0.781451
ENSSSCG00000002640	DEF8	820.509	0.0131466	0.098459	0.133523	0.89378	0.949514	632.852	0.045549	0.228199	0.199602	0.841792	0.997873	704.996	0.19051	0.220581	0.863672	0.387768	0.923864	667.015	0.118839	0.127406	0.932755	0.350946	0.749939
ENSSSCG00000002645	GALNS	1098.69	0.124365	0.0932367	1.33386	0.182249	0.435617	1095.89	0.0977754	0.198339	0.492972	0.622032	0.99491	1005.41	0.23479	0.269277	0.871928	0.383248	0.9223	1052.68	0.148478	0.192612	0.770866	0.440787	0.80527
ENSSSCG00000002646	TRAPPC2L	1118.77	-0.0288316	0.0823366	-0.350167	0.726213	0.867287	1129.44	0.080653	0.167718	0.480884	0.630599	0.995655	1108.44	-0.166088	0.182319	-0.910975	0.362309	0.920068	1119.15	-0.0381679	0.107548	-0.354893	0.72267	0.932004
ENSSSCG00000002648	CBFA2T3	211.867	0.0097841	0.217202	0.0450461	0.964071	0.981983	135.677	-0.075895	0.304193	-0.249496	0.802977	0.995655	103.534	0.391969	0.461576	0.849197	0.395772	0.927123	120.354	0.15238	0.295262	0.516084	0.605796	0.887645
ENSSSCG00000002650		356.593	0.486512	0.12389	3.92697	8.60227e-05	0.00249939	427.934	0.645588	0.202971	3.18069	0.00146927	0.0825852	372.797	0.644134	0.426062	1.51183	0.130576	0.775246	401.63	0.647677	0.232732	2.78293	0.00538706	0.106698
ENSSSCG00000002651		178.687	-0.215917	0.211663	-1.0201	0.307683	0.573102	200.323	0.05868	0.257654	0.227747	0.819843	0.99681	153.698	-0.48055	0.433676	-1.10808	0.267826	0.895851	178.045	-0.170214	0.292327	-0.582274	0.560382	0.866609
ENSSSCG00000002652	KLHDC4	1196.45	-0.0983141	0.0904518	-1.08692	0.277071	0.542557	1194.11	-0.00597729	0.158734	-0.037656	0.969962	0.998818	1068.38	-0.132006	0.202324	-0.652448	0.514112	0.958922	1133.96	-0.0604148	0.136725	-0.441869	0.658584	0.90634
ENSSSCG00000002654	FBXO31	970.658	0.0881527	0.114694	0.76859	0.442137	0.683384	875.651	-0.068356	0.18669	-0.366148	0.714255	0.995655	875.084	0.370626	0.247903	1.49504	0.134903	0.781276	875.138	0.141889	0.146117	0.971064	0.331516	0.735936
ENSSSCG00000002655	MAP1LC3B	11614.5	0.0751072	0.15329	0.489966	0.624158	0.808255	10227.9	0.0646638	0.331999	0.194771	0.845572	0.997873	10358.3	0.664211	0.433488	1.53225	0.125461	0.770338	10287.4	0.347055	0.289148	1.20027	0.230036	0.649482
ENSSSCG00000002656	ZCCHC14	432.261	-0.164034	0.143739	-1.14119	0.253791	0.519467	284.449	-0.413725	0.260767	-1.58657	0.112611	0.790795	354.205	0.173968	0.261555	0.665128	0.505969	0.956278	317.586	-0.0985877	0.179676	-0.548696	0.583214	0.876352
ENSSSCG00000002660	MTHFSD	622.632	0.240536	0.12257	1.96243	0.0497127	0.204526	756.264	0.14872	0.287037	0.51812	0.604375	0.994088	559.487	0.567199	0.457533	1.23969	0.21509	0.857271	662.509	0.316896	0.306777	1.03299	0.30161	0.712552
ENSSSCG00000002664	GSE1	1575.39	-0.263462	0.122709	-2.14704	0.03179	0.15489	1119.27	-0.345057	0.220897	-1.56207	0.11827	0.802549	1220.78	-0.287567	0.329473	-0.872809	0.382767	0.9223	1167.17	-0.304615	0.181824	-1.67533	0.0938705	0.476591
ENSSSCG00000002666	KIAA0513	697.497	0.388509	0.15136	2.56679	0.0102645	0.0746766	491.443	0.0840493	0.24591	0.34179	0.732509	0.995655	603.448	0.638826	0.338682	1.88621	0.0592668	0.64714	544.649	0.378149	0.209749	1.80287	0.071409	0.42006
ENSSSCG00000002667	ZDHHC7	792.724	0.0896515	0.0810763	1.10577	0.268827	0.534272	733.946	0.0487679	0.174757	0.279062	0.780197	0.995655	662.953	0.205454	0.204899	1.00271	0.316002	0.911283	700.014	0.11993	0.132363	0.90607	0.364899	0.758418
ENSSSCG00000002669	CRISPLD2	740.896	0.98238	0.475348	2.06666	0.0387666	0.175465	331.164	0.888311	0.444768	1.99725	0.0457985	0.584667	493.694	1.67627	0.514254	3.25962	0.0011156	0.132298	408.388	1.2291	0.41297	2.97626	0.0029179	0.0756182
ENSSSCG00000002670	USP10	1408.68	0.205935	0.10475	1.96597	0.0493025	0.203623	1128.01	0.100638	0.16857	0.597009	0.550501	0.993215	1089.44	0.444646	0.217145	2.04769	0.0405906	0.577119	1109.42	0.263879	0.128448	2.05437	0.0399399	0.322669
ENSSSCG00000002672	MEAK7	48.7024	-0.0809801	0.240617	-0.336552	0.736455	0.872915	41.325	-0.228848	0.413568	-0.553351	0.580023	0.993215	44.982	0.710766	0.441977	1.60815	0.107802	0.73981	43.059	0.239158	0.253036	0.945154	0.34458	0.745296
ENSSSCG00000002680	TAF1C	192.289	0.0605026	0.196593	0.307755	0.758268	0.884136	197.01	-0.0159574	0.35678	-0.044726	0.964326	0.998818	144.133	0.290576	0.316331	0.918581	0.358315	0.920068	171.815	0.112896	0.272314	0.414581	0.678449	0.915482
ENSSSCG00000002681	HSDL1	511.933	-0.00537873	0.159504	-0.0337217	0.973099	0.985758	471.672	-0.287149	0.182387	-1.5744	0.115395	0.798877	588.493	-0.133003	0.324558	-0.409797	0.681955	0.979182	527.13	-0.223532	0.217897	-1.02586	0.304956	0.715731
ENSSSCG00000002682	MBTPS1	1670.07	-0.0132985	0.0684915	-0.194163	0.846048	0.928157	1462.86	0.0878881	0.151856	0.578759	0.562752	0.993215	1504.42	-0.0117179	0.18021	-0.0650239	0.948155	0.998416	1482.3	0.0398203	0.0795962	0.500279	0.616878	0.893175
ENSSSCG00000002684	CDH13	292.205	-0.0354122	0.155459	-0.227791	0.819808	0.914481	308.582	0.336328	0.300315	1.11992	0.26275	0.949333	274.896	-0.320432	0.314877	-1.01764	0.308848	0.906913	292.48	0.0687346	0.251202	0.273623	0.784375	0.950743
ENSSSCG00000002688	PLCG2	4030	-0.061237	0.136173	-0.449702	0.652925	0.823638	3158.19	-0.10534	0.27636	-0.381169	0.703078	0.995655	2999.41	-0.155585	0.297188	-0.523526	0.600609	0.967434	3081.97	-0.146924	0.217693	-0.674916	0.499729	0.837598
ENSSSCG00000002689	CMIP	1695.2	0.09977	0.125992	0.791877	0.428432	0.673187	1089.84	-0.135396	0.164795	-0.821602	0.411303	0.983944	1465.4	0.0810144	0.235119	0.344568	0.730419	0.983197	1268.34	-0.0329935	0.15016	-0.219723	0.826087	0.964555
ENSSSCG00000002690	GAN	571.268	0.148965	0.131787	1.13035	0.258329	0.523967	494.601	-0.0754547	0.190702	-0.395668	0.69235	0.995655	559.099	0.10711	0.286132	0.374337	0.708153	0.981374	525.227	0.0120054	0.150004	0.0800341	0.93621	0.991029
ENSSSCG00000002697	NUDT7	117.699	0.0565418	0.22581	0.250396	0.802281	0.9052	115.302	-0.201888	0.307023	-0.657567	0.510816	0.990567	120.613	-0.323934	0.322632	-1.00403	0.315362	0.911283	117.804	-0.242079	0.193496	-1.25108	0.210904	0.633639
ENSSSCG00000002700		11.0444	-0.255021	0.39888	-0.639342	0.522601	0.742764	7.20949	-0.76951	0.97783	-0.786957	0.431307	0.983944	15.6111	-0.317004	0.735727	-0.430872	0.666561	0.978874	11.1997	-0.440864	0.520742	-0.846609	0.397213	0.780683
ENSSSCG00000002701	MON1B	1250.95	-0.151847	0.0834551	-1.81951	0.0688341	0.247316	1034.21	-0.21708	0.166362	-1.30486	0.191939	0.901207	1054.57	0.0422472	0.208168	0.202947	0.839176	0.99083	1043.64	-0.0892889	0.113812	-0.784529	0.43273	0.802042
ENSSSCG00000002703	TERF2IP	1206.74	-0.0921726	0.0959253	-0.960879	0.336613	0.598434	1169.59	0.00464729	0.181023	0.0256723	0.979519	0.998818	1280.87	-0.254148	0.240405	-1.05717	0.290435	0.9002	1222.09	-0.123805	0.122524	-1.01046	0.312274	0.72212
ENSSSCG00000002704	KARS	15453.4	0.0417645	0.123617	0.337853	0.735474	0.872694	15879.5	-0.056515	0.234131	-0.241381	0.809259	0.996517	14175.8	0.0984492	0.293575	0.335346	0.737364	0.983405	15065.9	0.00785754	0.201868	0.0389242	0.968951	0.99484
ENSSSCG00000002706	ADAT1	126.523	0.0906611	0.18812	0.481933	0.629854	0.811191	125.01	0.258668	0.356756	0.725055	0.468418	0.98867	134.977	-0.193231	0.353848	-0.546086	0.585007	0.966821	129.739	0.02951	0.223217	0.132203	0.894823	0.981248
ENSSSCG00000002707		115089	0.101144	0.146789	0.689045	0.490795	0.71894	90589.3	0.0919457	0.231158	0.397762	0.690806	0.995655	97965.6	0.609145	0.335083	1.81789	0.0690809	0.676271	94078.7	0.348743	0.203499	1.71373	0.0865776	0.45845
ENSSSCG00000002708	TMEM231	191.206	-0.0776679	0.133254	-0.582857	0.55999	0.767192	207.379	-0.291535	0.224619	-1.29791	0.19432	0.90134	168.263	0.132173	0.487898	0.270903	0.786466	0.988618	188.728	-0.125724	0.29253	-0.429781	0.667355	0.910779
ENSSSCG00000002709		6.33594	0.511028	0.507588	1.00678	0.314042	NA	6.12025	1.11235	1.12354	0.990035	0.322157	NA	4.55014	0.374892	1.22315	0.306498	0.759225	NA	5.37296	0.761156	0.664039	1.14625	0.25169	NA
ENSSSCG00000002712	LDHD	61.9389	-0.324528	0.240014	-1.35212	0.176337	0.426911	41.0934	-0.367081	0.464316	-0.790585	0.429186	0.983944	72.9468	-0.706082	0.448288	-1.57506	0.115242	0.751745	56.228	-0.612526	0.359041	-1.70601	0.0880067	0.461458
ENSSSCG00000002714	WDR59	308.377	-0.0141929	0.104174	-0.136243	0.891629	0.949185	250.99	0.0913994	0.217959	0.419342	0.674966	0.995655	307.574	-0.254971	0.295323	-0.863363	0.387938	0.923864	277.826	-0.090735	0.156234	-0.580762	0.561401	0.86715
ENSSSCG00000002715	RFWD3	938.72	-0.21187	0.109671	-1.93188	0.0533742	0.213505	796.718	-0.0890659	0.195112	-0.456485	0.648041	0.995655	868.153	-0.51351	0.293973	-1.74679	0.080673	0.697202	830.373	-0.297752	0.183212	-1.62517	0.104126	0.493875
ENSSSCG00000002716	MLKL	107.625	0.714804	0.167515	4.26711	1.98017e-05	0.00083443	116.5	0.95878	0.36934	2.59593	0.00943358	0.284846	105.137	0.602163	0.507841	1.18573	0.235728	0.875585	111.079	0.812046	0.301225	2.69581	0.0070218	0.125842
ENSSSCG00000002719	EXOSC6	65.0921	0.267676	0.231944	1.15405	0.248479	0.514048	71.5792	0.0576643	0.380697	0.151471	0.879605	0.998795	66.3445	0.680762	0.465033	1.4639	0.143221	0.794335	69.061	0.372691	0.288101	1.29361	0.195799	0.616847
ENSSSCG00000002722	DDX19B	1759.1	0.0404554	0.0738872	0.54753	0.584015	0.783156	1658.9	0.116312	0.170989	0.680231	0.496358	0.989825	1796.29	-0.0437161	0.201854	-0.216573	0.828541	0.989698	1723.76	0.0375745	0.105056	0.35766	0.720598	0.931536
ENSSSCG00000002723	AARS	3462.32	-0.469825	0.125084	-3.75606	0.000172609	0.0042802	3365.96	-0.729005	0.212147	-3.43631	0.000589687	0.0462493	2767.68	-0.20283	0.253779	-0.79924	0.424151	0.937386	3080.55	-0.505777	0.198102	-2.55311	0.0106765	0.15974
ENSSSCG00000002724	PDPR	642.452	0.174284	0.118726	1.46795	0.142118	0.378034	484.593	0.194174	0.233978	0.829883	0.406605	0.983944	588.084	0.0136706	0.216089	0.0632637	0.949556	0.998416	533.702	0.10365	0.139165	0.744799	0.456393	0.813941
ENSSSCG00000002729		835.777	0.0894693	0.0914061	0.978811	0.327673	0.590113	741.419	0.203343	0.182063	1.11688	0.264045	0.950467	708.738	0.0368851	0.234149	0.157529	0.874828	0.99083	725.691	0.124871	0.129063	0.967518	0.333285	0.737508
ENSSSCG00000002737	CHST4	7.67569	0.87226	0.539797	1.61591	0.106115	NA	8.39898	0.218221	1.12109	0.194651	0.845666	0.997873	7.83703	1.46815	1.01022	1.4533	0.146142	NA	8.13062	0.803484	0.678703	1.18385	0.236472	0.656017
ENSSSCG00000002738	ZNF23	41.5927	0.0422782	0.213879	0.197674	0.8433	0.92658	31.8516	0.148855	0.627326	0.237285	0.812436	0.996517	42.1392	-0.186454	0.471672	-0.395305	0.692618	0.979182	36.7412	-0.0305848	0.333421	-0.0917303	0.926912	0.989063
ENSSSCG00000002739	PHLPP2	454.379	0.522083	0.103834	5.02807	4.9543e-07	4.93691e-05	439.103	0.661074	0.339782	1.94558	0.0517053	0.608233	433.931	0.526564	0.372259	1.41451	0.157213	0.809912	436.566	0.597597	0.247075	2.41869	0.0155767	0.197115
ENSSSCG00000002740	AP1G1	2227.05	-0.161957	0.0854486	-1.89537	0.0580438	0.223385	1761.18	-0.168557	0.179235	-0.940421	0.347002	0.967942	2060.46	-0.27064	0.193754	-1.39682	0.162467	0.811098	1903.09	-0.219877	0.117397	-1.87293	0.0610778	0.393983
ENSSSCG00000002741	ZNF821	35.5781	-0.124669	0.251795	-0.49512	0.620515	0.806124	33.9298	-0.173079	0.5618	-0.30808	0.758022	0.995655	36.5039	0.0119584	0.523932	0.0228243	0.98179	0.998768	35.1504	-0.119381	0.356247	-0.335107	0.737545	0.93746
ENSSSCG00000002743	IST1	2174.75	0.0961776	0.0615386	1.56288	0.11808	0.339749	1894.51	0.11123	0.147022	0.756556	0.449316	0.988535	2363.89	0.0345422	0.172354	0.200414	0.841157	0.99083	2117.36	0.0713258	0.0910119	0.783697	0.433218	0.802319
ENSSSCG00000002746	DHODH	60.6851	0.20834	0.165403	1.25959	0.207818	0.46753	68.7119	0.279423	0.358178	0.780125	0.435317	0.983944	66.9672	0.2563	0.439074	0.583729	0.559403	0.96456	67.8725	0.268635	0.243263	1.1043	0.269465	0.686498
ENSSSCG00000002747	PMFBP1	52.775	0.161458	0.248254	0.650373	0.515451	0.738262	51.7173	-0.332937	0.462082	-0.720514	0.471208	0.98867	72.3569	0.687436	0.375664	1.82992	0.0672617	0.674353	61.5339	0.229738	0.289591	0.793319	0.427592	0.799037
ENSSSCG00000002748	DHX38	1208.49	-0.235865	0.0668014	-3.53084	0.000414236	0.0081961	1095.99	-0.150578	0.163011	-0.923724	0.35563	0.967942	1184.34	-0.240083	0.268153	-0.895319	0.370616	0.920068	1137.66	-0.192964	0.126153	-1.5296	0.126116	0.525539
ENSSSCG00000002749		97.3436	0.128634	0.235352	0.54656	0.584681	0.783261	93.2634	-0.453027	0.374973	-1.20816	0.226986	0.926787	114.526	0.809638	0.450677	1.79649	0.0724163	0.682083	103.342	0.207691	0.307688	0.675004	0.499673	0.837598
ENSSSCG00000002752	ZFHX3	1640.89	0.28341	0.170076	1.66637	0.095639	0.299469	1063.08	-0.0275866	0.166408	-0.165777	0.868333	0.998795	1409.26	0.27866	0.317854	0.876692	0.380654	0.922287	1227.59	0.145376	0.186238	0.780592	0.435042	0.803164
ENSSSCG00000002753	NOB1	542.961	-0.0328269	0.0876744	-0.374418	0.708093	0.856634	498.223	0.0513225	0.182581	0.281095	0.778638	0.995655	487.431	-0.0314203	0.232302	-0.135257	0.892409	0.991674	492.955	0.0147376	0.119629	0.123194	0.901953	0.983485
ENSSSCG00000002754	NQO1	380.451	0.475939	0.414126	1.14926	0.250448	0.515508	334.415	0.226555	0.308149	0.735215	0.462208	0.98867	410.53	-0.269086	0.385388	-0.698221	0.485039	0.952351	370.575	-0.0524327	0.255013	-0.205608	0.837097	0.967959
ENSSSCG00000002755	NFAT5	2219.49	0.00421762	0.10648	0.0396094	0.968405	0.983563	1583.02	-0.00140184	0.214757	-0.00652757	0.994792	0.999052	2058.33	0.101429	0.246502	0.411476	0.680724	0.979182	1808.9	0.0560882	0.154731	0.362488	0.716987	0.930848
ENSSSCG00000002759		499.295	-0.0172004	0.126001	-0.13651	0.891418	0.949185	491.004	0.125577	0.21636	0.580408	0.561639	0.993215	499.3	-0.0401887	0.276104	-0.145556	0.884272	0.99083	494.789	0.0471461	0.146673	0.321438	0.747879	0.940976
ENSSSCG00000002762	TERF2	900.883	-0.0678357	0.0979908	-0.692266	0.48877	0.718558	725.885	-0.0393523	0.203972	-0.19293	0.847014	0.998437	888.545	-0.223371	0.289347	-0.771984	0.440124	0.942472	803.032	-0.136811	0.166552	-0.821431	0.411401	0.788113
ENSSSCG00000002763	PRMT7	873.481	-0.0493033	0.0922269	-0.534587	0.592936	0.788528	831.583	-0.00658662	0.166594	-0.0395369	0.968462	0.998818	901.107	-0.100393	0.199847	-0.502349	0.615422	0.96981	864.458	-0.0519677	0.0862883	-0.602257	0.547003	0.860607
ENSSSCG00000002764	SMPD3	78.3927	0.2181	0.259043	0.841945	0.399819	0.65202	93.8569	0.114127	0.298845	0.381893	0.702541	0.995655	50.5699	0.782042	0.612445	1.27692	0.201631	0.845159	73.228	0.31528	0.417443	0.755264	0.450091	0.810079
ENSSSCG00000002768	CENPT	156.452	-1.00169	0.211456	-4.73711	2.16783e-06	0.00014728	131.957	-0.702341	0.395936	-1.77388	0.0760836	0.698879	217.924	-1.41624	0.512792	-2.76183	0.00574786	0.281959	172.703	-1.08407	0.362132	-2.99358	0.00275721	0.0732365
ENSSSCG00000002769	THAP11	973.262	0.343442	0.123234	2.78691	0.0053214	0.0483354	989.277	0.375926	0.200279	1.87701	0.0605167	0.648427	958.207	-0.00601541	0.224373	-0.0268099	0.978611	0.998768	974.3	0.189973	0.151358	1.25512	0.209436	0.631851
ENSSSCG00000002774	RIPOR1	672.215	-0.430722	0.145907	-2.95203	0.00315695	0.0339838	391.973	-0.405	0.25287	-1.60161	0.109242	0.788242	479.083	-0.682319	0.393056	-1.73594	0.0825753	0.70329	433.261	-0.582577	0.301471	-1.93245	0.0533042	0.369158
ENSSSCG00000002776	ATP6V0D1	1141.11	0.265841	0.108191	2.45715	0.0140045	0.0927293	1083.7	0.0958073	0.193351	0.49551	0.62024	0.99491	1035.96	0.179979	0.292352	0.615625	0.538142	0.962506	1060.78	0.126884	0.167211	0.758825	0.447957	0.809769
ENSSSCG00000002779	LRRC36	10.7385	-0.251934	0.497871	-0.506023	0.612841	0.80174	13.2884	-0.0493687	0.67728	-0.0728926	0.941892	0.998795	11.6595	-2.12119	1.21268	-1.74917	0.0802621	0.696449	12.5148	-0.83974	0.65491	-1.28222	0.199765	0.621384
ENSSSCG00000002783	SLC9A5	109.898	0.21215	0.203687	1.04155	0.297621	0.562224	88.4028	-0.202287	0.379212	-0.533439	0.593729	0.99323	100.802	0.538994	0.395929	1.36134	0.173406	0.821192	94.282	0.188723	0.247789	0.761629	0.446282	0.808974
ENSSSCG00000002786	ELMO3	47.3031	0.12049	0.210213	0.573181	0.566522	0.770877	52.1797	0.321813	0.36763	0.875372	0.381371	0.976796	52.4478	0.491994	0.435453	1.12985	0.258541	0.889725	52.2973	0.410193	0.214472	1.91257	0.0558034	0.375274
ENSSSCG00000002787	E2F4	4889.67	0.0492098	0.142802	0.344603	0.730393	0.869861	4429.71	-0.0552721	0.186818	-0.295861	0.767336	0.995655	4009.82	0.392884	0.253806	1.54797	0.121631	0.763951	4228.88	0.148894	0.174163	0.854912	0.3926	0.778325
ENSSSCG00000002790	TMEM208	366.606	-0.00527418	0.100475	-0.0524924	0.958136	0.978416	320.903	0.0167898	0.229645	0.0731121	0.941717	0.998795	377.622	-0.051759	0.231385	-0.223692	0.822997	0.989273	347.802	-0.0198192	0.122504	-0.161785	0.871475	0.975987
ENSSSCG00000002792	HSF4	45.2914	-0.433866	0.209283	-2.07311	0.0381622	0.173649	44.3353	-0.843672	0.479441	-1.7597	0.0784592	0.704076	52.7895	-0.352095	0.495569	-0.710487	0.477402	0.951667	48.3338	-0.565866	0.315765	-1.79205	0.073125	0.42497
ENSSSCG00000002793		8.53055	0.825783	0.415966	1.98522	0.0471201	NA	12.4114	0.570646	0.781139	0.730531	0.465066	0.98867	3.88706	0.422077	1.23209	0.342571	0.731921	NA	8.35332	0.648525	0.684375	0.947616	0.343325	0.744042
ENSSSCG00000002799	CNOT1	10391	-0.0663346	0.0704577	-0.941481	0.346459	0.606394	8799.81	-0.0307501	0.169749	-0.18115	0.856249	0.998795	9767.55	-0.0891134	0.184129	-0.483973	0.628405	0.974383	9258.12	-0.0604477	0.0960436	-0.629378	0.529102	0.849788
ENSSSCG00000002802	GINS3	117.743	-0.597706	0.217165	-2.75232	0.00591754	0.0520525	107.097	0.029097	0.32347	0.0899529	0.928325	0.998795	127.988	-1.25712	0.4357	-2.8853	0.00391041	0.234451	116.972	-0.611764	0.303525	-2.01553	0.0438488	0.336459
ENSSSCG00000002804	CSNK2A2	2206.76	-0.140832	0.105576	-1.33393	0.182225	0.435617	1741.95	-0.124969	0.230041	-0.543247	0.58696	0.993215	2010.8	-0.277255	0.303705	-0.912909	0.36129	0.920068	1869.38	-0.201421	0.176135	-1.14357	0.252804	0.671124
ENSSSCG00000002805	CFAP20	213.215	0.0374643	0.116451	0.321718	0.747667	0.879318	212.134	0.236287	0.22977	1.02836	0.303779	0.960992	222.652	0.108465	0.240545	0.450913	0.652052	0.977132	217.078	0.171923	0.113325	1.51708	0.129246	0.530998
ENSSSCG00000002807	USB1	146.466	0.291976	0.132323	2.20653	0.0273469	0.140212	140.861	0.459853	0.285225	1.61225	0.106908	0.781638	163.248	0.223016	0.257315	0.866704	0.386104	0.923864	151.481	0.340312	0.146806	2.31811	0.0204432	0.230555
ENSSSCG00000002808	ZNF319	213.337	-0.0886991	0.169176	-0.524301	0.600069	0.793527	151.026	-0.0503937	0.341437	-0.147593	0.882664	0.998795	165.945	-0.139355	0.40236	-0.346345	0.729084	0.983197	158.077	-0.0887335	0.229374	-0.386851	0.698867	0.923646
ENSSSCG00000002811		25.5566	-0.173121	0.294726	-0.587396	0.556938	0.765893	32.2334	-0.0620739	0.675275	-0.0919238	0.926759	0.998795	24.3302	0.0498341	0.699116	0.0712816	0.943174	0.998416	28.47	-0.150317	0.715307	-0.210143	0.833556	0.967267
ENSSSCG00000002812	KIFC3	17.2634	-0.0713401	0.368214	-0.193747	0.846374	0.928182	19.4975	0.262748	0.728372	0.360732	0.7183	0.995655	14.336	-0.508156	0.912146	-0.557099	0.57746	0.966659	17.0351	0.226628	0.55707	0.406822	0.684139	0.917952
ENSSSCG00000002813	KATNB1	310.859	0.208698	0.143146	1.45794	0.144856	0.381945	327.668	0.310924	0.255995	1.21457	0.224531	0.924714	273.751	0.07457	0.295041	0.252744	0.800466	0.988618	301.952	0.193564	0.204386	0.947052	0.343612	0.744118
ENSSSCG00000002814	ADGRG3	201.808	0.21392	0.302415	0.707371	0.479336	0.712052	111.407	-0.18386	0.409302	-0.449202	0.653286	0.995655	207.419	1.0225	0.430395	2.37572	0.0175146	0.439167	157.058	0.559604	0.361313	1.54881	0.121428	0.520188
ENSSSCG00000002815	ADGRG1	4078.24	-0.170988	0.162788	-1.05037	0.293547	0.558167	2575.31	-0.227982	0.249877	-0.912375	0.361572	0.967942	3071.05	-0.0235961	0.494429	-0.047724	0.961936	0.998521	2810.27	-0.136199	0.285345	-0.477314	0.633138	0.900451
ENSSSCG00000002817	DRC7	6.63988	-0.169176	0.475956	-0.355444	0.722257	NA	4.62392	0.108198	1.30803	0.0827185	0.934075	NA	7.93092	0.149459	1.03933	0.143804	0.885655	NA	6.19604	0.213719	0.701958	0.304461	0.760777	NA
ENSSSCG00000002819	ARL2BP	10411.1	0.0856838	0.155996	0.549269	0.582821	0.782229	9225.58	0.0290112	0.233636	0.124173	0.901178	0.998795	9892.25	0.675326	0.307935	2.19308	0.0283019	0.517753	9541.65	0.369194	0.311698	1.18446	0.236231	0.656017
ENSSSCG00000002820	RSPRY1	894.97	-0.0569079	0.114281	-0.497965	0.618508	0.804765	772.269	-0.24884	0.225257	-1.10469	0.269294	0.952633	765.778	0.21233	0.196242	1.08198	0.279261	0.899985	769.044	-0.0343226	0.181372	-0.189239	0.849906	0.970916
ENSSSCG00000002822	AMFR	1626.5	-0.116436	0.0755547	-1.54108	0.123298	0.348214	1429.29	-0.0870383	0.179368	-0.485249	0.6275	0.995655	1601.69	-0.137467	0.228312	-0.602101	0.547107	0.96456	1510.87	-0.112922	0.111157	-1.01587	0.309691	0.720933
ENSSSCG00000002828	LPCAT2	1050.91	0.382853	0.210022	1.82292	0.0683159	0.245996	1090.54	0.775931	0.305437	2.54039	0.0110729	0.306458	962.635	0.373706	0.359936	1.03826	0.299151	0.903854	1029.52	0.620353	0.243452	2.54816	0.0108293	0.160458
ENSSSCG00000002829	MMP2	19.0441	-0.203134	0.407613	-0.49835	0.618237	0.804765	16.4938	-0.560549	0.768684	-0.729232	0.465859	0.98867	11.0803	0.0887203	1.02339	0.0866924	0.930916	0.997528	13.9114	-0.327219	0.564834	-0.579318	0.562375	0.868071
ENSSSCG00000002841	N4BP1	3210.06	0.291975	0.104239	2.80101	0.00509425	0.0468594	2625.56	0.250796	0.151808	1.65206	0.0985231	0.764813	3412.14	0.476827	0.259362	1.83846	0.0659947	0.669879	2999.16	0.374356	0.142925	2.61925	0.00881233	0.143984
ENSSSCG00000002844	PHKB	6007.81	0.103179	0.188699	0.546793	0.584521	0.783261	5468.38	-0.0683642	0.153466	-0.445469	0.655981	0.995655	6726.1	-0.337809	0.297832	-1.13423	0.2567	0.886555	6065.89	-0.221259	0.17779	-1.2445	0.213317	0.636034
ENSSSCG00000002846	DNAJA2	2328.93	0.012098	0.0633165	0.191071	0.84847	0.928977	2068.96	-0.050231	0.183745	-0.273373	0.784566	0.995655	2301.84	0.0698537	0.182478	0.382806	0.701864	0.980743	2179.24	0.00780375	0.112129	0.0695964	0.944515	0.992488
ENSSSCG00000002847	GPT2	138.399	0.0649114	0.206478	0.314374	0.753237	0.882155	109.062	-0.228282	0.591756	-0.385771	0.699666	0.995655	125.19	0.384152	0.354403	1.08394	0.278391	0.899985	116.71	0.0885849	0.358331	0.247215	0.804742	0.957029
ENSSSCG00000002849	SHCBP1	440.865	-0.154502	0.090211	-1.71268	0.0867714	0.283337	427.253	-0.0607648	0.194635	-0.312198	0.75489	0.995655	449.825	-0.175479	0.226735	-0.773941	0.438966	0.942472	437.855	-0.109835	0.15357	-0.715214	0.474477	0.82431
ENSSSCG00000002850		1050.56	0.445555	0.147144	3.02802	0.00246163	0.0286781	428.423	0.460009	0.291332	1.57899	0.114339	0.796772	679.017	0.605388	0.323477	1.8715	0.0612753	0.651373	547.534	0.481648	0.300887	1.60076	0.109429	0.500533
ENSSSCG00000002852	PLEKHF1	225.484	-0.385245	0.187565	-2.05393	0.0399824	0.178719	193.003	0.0497569	0.369467	0.134672	0.892871	0.998795	208.154	-0.601042	0.433565	-1.38628	0.165662	0.813831	200.115	-0.277676	0.29165	-0.952086	0.341053	0.74273
ENSSSCG00000002854	POP4	308.935	-0.369767	0.126967	-2.9123	0.00358775	0.0372075	271.246	-0.156195	0.302274	-0.516733	0.605343	0.994088	307.658	-0.50136	0.251219	-1.99571	0.0459657	0.594513	288.463	-0.330005	0.175533	-1.88002	0.0601057	0.391383
ENSSSCG00000002855		109.878	-0.3618	0.150527	-2.40355	0.0162367	0.10164	89.7042	-0.0220029	0.31261	-0.0703844	0.943888	0.998795	99.952	-0.522438	0.419235	-1.24617	0.212702	0.853973	94.5319	-0.270367	0.247007	-1.09457	0.273704	0.689089
ENSSSCG00000002857		77.7351	-0.497302	0.240478	-2.06797	0.0386426	0.175022	50.2754	-0.806138	0.501883	-1.60623	0.108224	0.78508	91.0397	-0.599592	0.569502	-1.05284	0.292416	0.901475	69.6203	-0.657684	0.401086	-1.63976	0.101055	0.490077
ENSSSCG00000002859	ANKRD27	1899.82	0.0717883	0.0707515	1.01465	0.310271	0.575347	1406.44	0.0817321	0.180446	0.452945	0.650588	0.995655	1811.97	0.0423756	0.180082	0.235312	0.813966	0.988618	1599.07	0.0660239	0.161145	0.409717	0.682014	0.917024
ENSSSCG00000002860	PDCD5	240.568	-0.113668	0.129146	-0.880149	0.378778	0.635641	224.318	0.0241435	0.259553	0.0930197	0.925888	0.998795	259.043	-0.214074	0.2974	-0.719818	0.471637	0.950567	240.752	-0.0888281	0.174053	-0.510349	0.609807	0.889048
ENSSSCG00000002862		9.42015	-0.89842	0.522264	-1.72024	0.0853885	NA	13.0801	-1.83513	0.808026	-2.27112	0.0231395	0.438415	6.16335	-1.41096	1.06677	-1.32265	0.185952	NA	9.78255	-1.64208	0.598361	-2.7443	0.00606397	0.11414
ENSSSCG00000002865	GPATCH1	296.553	-0.125611	0.111004	-1.13159	0.257808	0.523502	220.034	-0.171037	0.292491	-0.58476	0.558709	0.993215	242.73	-0.0672056	0.430987	-0.155934	0.876085	0.99083	230.756	-0.108772	0.237263	-0.458447	0.646631	0.903764
ENSSSCG00000002866	CEBPA	21.1044	0.516245	0.354615	1.45579	0.145451	0.382394	17.03	0.0160007	0.841827	0.0190071	0.984835	0.999052	19.6315	0.522083	0.882288	0.591737	0.554026	0.96456	18.2671	0.295469	0.549519	0.537687	0.590793	0.879598
ENSSSCG00000002867	CEBPG	523.355	-0.115754	0.0848731	-1.36385	0.172614	0.421783	450.087	0.0017727	0.183652	0.00965253	0.992299	0.999052	487.025	-0.158051	0.231183	-0.683662	0.494189	0.95501	467.543	-0.075437	0.103988	-0.725439	0.468183	0.820044
ENSSSCG00000002868	PEPD	393.241	0.211532	0.0944527	2.23956	0.0251196	0.133264	395.617	0.22158	0.22976	0.964399	0.334846	0.967942	380.533	0.28816	0.251977	1.14359	0.252792	0.884464	388.34	0.250835	0.147441	1.70126	0.088894	0.464187
ENSSSCG00000002869	LSM14A	6415.15	0.0106436	0.0779542	0.136537	0.891397	0.949185	5709.81	-0.0386307	0.142982	-0.270178	0.787023	0.995655	6614.62	-0.103077	0.183312	-0.562304	0.573909	0.966659	6138.76	-0.0708999	0.074214	-0.955344	0.339404	0.741739
ENSSSCG00000002872	KIAA0355	281.42	-0.170844	0.103875	-1.6447	0.100032	0.307201	192.611	-0.0534215	0.272918	-0.195742	0.844812	0.997873	246.128	-0.168075	0.24991	-0.672542	0.501238	0.956278	218.04	-0.113883	0.160197	-0.710894	0.47715	0.825509
ENSSSCG00000002873	GPI	3389.91	0.183381	0.0914048	2.00625	0.0448296	0.191669	2963.36	0.231329	0.160533	1.441	0.149584	0.849091	3270.99	0.00696732	0.20419	0.0341218	0.97278	0.998768	3109.07	0.118396	0.0984064	1.20313	0.228927	0.649482
ENSSSCG00000002875		67.8069	0.317898	0.205216	1.54909	0.121361	0.344939	61.2301	0.473298	0.468477	1.01029	0.312357	0.960992	73.0289	0.104382	0.430271	0.242595	0.808319	0.988618	66.8198	0.278833	0.276004	1.01025	0.312376	0.722182
ENSSSCG00000002877		188.994	-0.06279	0.220673	-0.284539	0.775998	0.891637	183.317	-0.15197	0.264478	-0.574602	0.56556	0.993215	208.737	-0.454398	0.289617	-1.56896	0.116657	0.75633	195.348	-0.293696	0.166148	-1.76768	0.0771145	0.434158
ENSSSCG00000002879	GRAMD1A	1385.79	0.00496185	0.113365	0.0437689	0.965089	0.982038	1217.22	0.0589896	0.210327	0.280467	0.77912	0.995655	1278.57	-0.143507	0.349088	-0.411091	0.681006	0.979182	1245.97	-0.0326865	0.188799	-0.173129	0.86255	0.974328
ENSSSCG00000002885	USF2	4525.95	0.277069	0.140273	1.97522	0.0482436	0.201068	4073.61	0.133262	0.182076	0.731902	0.464228	0.98867	3694.9	0.683791	0.256815	2.66258	0.00775441	0.309488	3892.64	0.381122	0.192503	1.97982	0.0477238	0.349741
ENSSSCG00000002887	MAG	6.92829	0.783965	0.465722	1.68333	0.0923108	NA	5.58297	0.78137	1.24511	0.627552	0.530298	NA	5.30706	1.18192	1.06204	1.11288	0.265759	NA	5.45228	0.973389	0.650846	1.49557	0.134765	NA
ENSSSCG00000002891		50.9373	-0.386496	0.301573	-1.2816	0.199983	0.45685	49.376	-0.237987	0.589625	-0.403624	0.686489	0.995655	41.3808	-1.19195	0.561604	-2.12239	0.0338046	0.545184	45.5668	-0.633865	0.408443	-1.5519	0.120685	0.519165
ENSSSCG00000002893	CD22	1260.99	0.135531	0.140361	0.965591	0.334249	0.595911	1267.21	0.134535	0.184211	0.730333	0.465187	0.98867	1041.28	-0.0155173	0.299687	-0.0517783	0.958705	0.998416	1159.47	0.0745809	0.196584	0.379385	0.704402	0.925767
ENSSSCG00000002895	KMT2B	1720.55	-0.0652753	0.069574	-0.938213	0.348135	0.607887	1187.16	-0.116239	0.211379	-0.549905	0.582385	0.993215	1320.78	0.03656	0.343822	0.106334	0.915317	0.99522	1250.4	-0.0359991	0.183972	-0.195677	0.844863	0.969287
ENSSSCG00000002898	LIN37	278.05	0.0935617	0.0927599	1.00864	0.313145	0.578066	261.849	0.12025	0.217722	0.552309	0.580737	0.993215	306.09	0.0709032	0.315707	0.224586	0.822302	0.989273	282.827	0.0966004	0.153429	0.629611	0.528949	0.84966
ENSSSCG00000002904	HAUS5	534.435	-0.275988	0.12567	-2.19613	0.0280825	0.142674	494.241	-0.147932	0.259422	-0.570237	0.568517	0.993215	590.873	-0.4753	0.329921	-1.44065	0.149684	0.805121	539.956	-0.316628	0.197846	-1.60037	0.109516	0.500533
ENSSSCG00000002905	RBM42	1854.58	0.00606409	0.100042	0.0606152	0.951666	0.976	1815.98	-0.0519061	0.15897	-0.326515	0.744034	0.995655	1544.52	0.0951206	0.201415	0.472261	0.63674	0.976453	1686.35	0.0139125	0.148789	0.0935053	0.925502	0.988951
ENSSSCG00000002906	ETV2	53.3009	0.0707561	0.188123	0.376116	0.706831	0.855748	59.005	-0.0877691	0.48861	-0.17963	0.857443	0.998795	57.6258	0.235674	0.621581	0.379152	0.704575	0.981374	58.3288	0.0669651	0.364145	0.183897	0.854094	0.971925
ENSSSCG00000002907		2073.61	0.0040836	0.103393	0.0394959	0.968495	0.983563	2465.74	-0.00447124	0.189067	-0.023649	0.981133	0.998917	2373.14	0.0973543	0.282902	0.344127	0.730751	0.983197	2421.15	0.0431127	0.155961	0.276432	0.782216	0.949855
ENSSSCG00000002908	ZBTB32	243.641	0.0308617	0.199906	0.154381	0.877309	0.94303	183.525	0.531017	0.278587	1.9061	0.0566367	0.63396	177.055	-0.300797	0.442634	-0.679561	0.496782	0.95501	180.397	0.105871	0.276869	0.382385	0.702176	0.924685
ENSSSCG00000002910	ALKBH6	139.128	-0.262417	0.158752	-1.65301	0.0983295	0.304289	115.156	-0.597712	0.340675	-1.7545	0.0793457	0.706984	127.514	-0.209689	0.295048	-0.710696	0.477273	0.951667	121.005	-0.365171	0.201354	-1.81357	0.0697433	0.415531
ENSSSCG00000002917	NFKBID	628.227	0.334119	0.213984	1.56142	0.118426	0.340375	549.351	0.379633	0.23511	1.6147	0.106376	0.779926	567.474	0.385946	0.310841	1.24162	0.214377	0.856482	557.869	0.388723	0.169782	2.28954	0.0220478	0.239821
ENSSSCG00000002918		500.83	0.0935841	0.17728	0.527889	0.597576	0.791608	426.394	-0.00324239	0.387814	-0.00836069	0.993329	0.999052	481.167	0.0263757	0.436059	0.0604864	0.951768	0.998416	452.327	0.0101784	0.288834	0.0352394	0.971889	0.99484
ENSSSCG00000002919	TYROBP	2531.15	0.582873	0.161551	3.60797	0.000308599	0.00647143	2672.05	0.494372	0.232915	2.12255	0.033792	0.517639	3319.68	0.71292	0.367467	1.94009	0.0523687	0.625137	2979.73	0.625496	0.23665	2.64313	0.00821442	0.139252
ENSSSCG00000002921	CLIP3	50.9645	-0.402781	0.200634	-2.00754	0.0446917	0.191306	31.9443	-0.323105	0.543016	-0.59502	0.55183	0.993215	40.0223	-0.380708	0.508089	-0.749295	0.453679	0.945925	35.78	-0.392572	0.298295	-1.31605	0.188157	0.608916
ENSSSCG00000002923	WDR62	393.698	-0.207683	0.10482	-1.98133	0.0475538	0.199128	328.313	-0.265467	0.221039	-1.201	0.229752	0.928722	325.122	-0.0811818	0.24703	-0.328631	0.742434	0.983405	326.698	-0.177439	0.131407	-1.3503	0.176919	0.597742
ENSSSCG00000002926	TBCB	315.087	0.11581	0.115861	0.999557	0.317525	0.581549	303.848	0.204327	0.206767	0.9882	0.323055	0.967458	342.125	-0.161276	0.237853	-0.678048	0.497742	0.955397	321.982	0.0201684	0.149771	0.134662	0.892879	0.981045
ENSSSCG00000002930	ZNF260	152.138	-0.36209	0.213157	-1.6987	0.0893749	0.287468	128.985	-0.271321	0.289676	-0.936638	0.348945	0.967942	165.113	-0.698136	0.524754	-1.33041	0.183384	0.827741	146.08	-0.517629	0.290956	-1.77906	0.0752296	0.430184
ENSSSCG00000002931	ZNF565	31.0097	0.166425	0.247509	0.672398	0.501331	0.727822	22.0932	-0.334744	0.792208	-0.422546	0.672627	0.995655	38.3698	0.131625	0.471318	0.27927	0.780038	0.987834	29.8299	-0.0485043	0.437165	-0.110952	0.911655	0.985809
ENSSSCG00000002932	ZNF567	188.95	-0.224545	0.126412	-1.77629	0.0756859	0.260961	155.202	-0.0644267	0.425377	-0.151458	0.879615	0.998795	204.947	-0.448907	0.354228	-1.26728	0.205055	0.848264	178.804	-0.258709	0.280804	-0.921315	0.356886	0.753053
ENSSSCG00000002933	ZNF382	43.2794	-0.364395	0.25169	-1.44779	0.147675	0.385879	42.3946	-0.875054	0.42668	-2.05084	0.0402821	0.559059	51.4416	0.268815	0.598114	0.449437	0.653116	0.977132	46.6786	-0.269503	0.348736	-0.772799	0.439641	0.804573
ENSSSCG00000002935		54.9766	0.0964516	0.206848	0.466292	0.641006	0.816417	42.1043	0.139368	0.410804	0.339256	0.734417	0.995655	61.8131	0.129902	0.521354	0.249162	0.803235	0.988618	51.4605	0.136162	0.290535	0.468658	0.639314	0.901994
ENSSSCG00000002937		217.838	-0.165445	0.117352	-1.40982	0.158592	0.402371	174.792	-0.174331	0.256811	-0.67883	0.497245	0.989825	203.458	-0.171436	0.309468	-0.55397	0.5796	0.966659	188.388	-0.168549	0.154951	-1.08776	0.276703	0.691244
ENSSSCG00000002938		40.8235	0.185724	0.324679	0.572024	0.567306	0.771458	46.1385	0.770968	0.488859	1.57708	0.114778	0.796772	41.5592	-0.579516	0.507363	-1.14221	0.253366	0.884775	43.9433	0.109801	0.358044	0.306669	0.759096	0.945284
ENSSSCG00000002950		707.034	0.0405538	0.139194	0.291348	0.770785	0.889483	468.722	0.0481145	0.227219	0.211754	0.832299	0.997873	379.169	0.240091	0.325681	0.737196	0.461003	0.948063	426.016	0.138915	0.203674	0.682045	0.49521	0.836065
ENSSSCG00000002952	YIF1B	163.301	0.0972564	0.119022	0.81713	0.413854	0.661888	159.404	-0.0936679	0.275669	-0.339784	0.734019	0.995655	161.119	0.266214	0.283862	0.937828	0.348333	0.920052	160.178	0.080117	0.162785	0.492166	0.622602	0.895935
ENSSSCG00000002953		107.58	-0.0108036	0.177528	-0.060856	0.951474	0.975878	106.24	-0.557391	0.305464	-1.82474	0.068041	0.677936	109.315	0.124175	0.308078	0.403064	0.686901	0.979182	107.672	-0.226446	0.191839	-1.1804	0.237843	0.657116
ENSSSCG00000002954	SPINT2	260.146	0.295124	0.171475	1.72109	0.0852341	0.280205	189.325	0.103435	0.273445	0.378267	0.705232	0.995655	271.818	0.0109813	0.237778	0.0461829	0.963164	0.998768	228.529	0.0327424	0.215001	0.152289	0.878959	0.977616
ENSSSCG00000002955	CATSPERG	108.328	-0.36807	0.179083	-2.05531	0.0398495	0.178545	86.157	-0.787708	0.415773	-1.89457	0.0581499	0.640361	86.5011	-0.183959	0.381916	-0.481673	0.630038	0.974383	86.288	-0.447885	0.249259	-1.79687	0.0723562	0.422177
ENSSSCG00000002959	FAM98C	92.7107	0.265611	0.165734	1.60263	0.109016	0.323671	106.505	-0.11049	0.284037	-0.388999	0.697277	0.995655	87.7058	0.210929	0.351207	0.600582	0.548118	0.96456	97.5399	0.0315391	0.212324	0.148542	0.881915	0.978719
ENSSSCG00000002960	RASGRP4	346.579	0.219904	0.147006	1.49588	0.134685	0.365639	249.283	0.186634	0.316221	0.5902	0.555057	0.993215	263.226	0.433732	0.241573	1.79545	0.072582	0.682083	255.869	0.30993	0.184084	1.68363	0.0922536	0.472716
ENSSSCG00000002962	MAP4K1	2938.24	0.027612	0.0899128	0.307097	0.758769	0.884225	2771.46	0.11056	0.152238	0.726229	0.467699	0.98867	2776.06	-0.0555659	0.211372	-0.262881	0.792642	0.988618	2773	0.0321904	0.105788	0.304291	0.760906	0.945576
ENSSSCG00000002963		34026.1	0.195467	0.11782	1.65902	0.0971111	0.301851	36679	0.140912	0.202534	0.695743	0.48659	0.988754	34568.1	0.414517	0.241474	1.71661	0.0860505	0.710366	35668.2	0.262389	0.166615	1.57482	0.115299	0.50972
ENSSSCG00000002965	ACTN4	3871.81	0.0141396	0.0903216	0.156548	0.875601	0.942591	2848.13	0.0950484	0.182603	0.520518	0.602702	0.994088	3136.57	-0.0447266	0.230905	-0.193702	0.84641	0.99083	2984.53	0.0295404	0.119789	0.246603	0.805215	0.957029
ENSSSCG00000002988	ZNF546	68.969	-0.36745	0.162866	-2.25614	0.0240617	0.130352	57.4983	-0.512251	0.418176	-1.22497	0.220588	0.923093	65.6029	-0.318257	0.391829	-0.812235	0.416657	0.932385	61.3414	-0.392004	0.221847	-1.767	0.0772275	0.43434
ENSSSCG00000002989	AKT2	3501.81	-0.0713438	0.0764706	-0.932957	0.350842	0.610295	3270.28	-0.175057	0.14357	-1.21931	0.222726	0.924201	3312.82	0.00370527	0.199206	0.0186001	0.98516	0.998768	3289.79	-0.0885541	0.094282	-0.939247	0.347604	0.747631
ENSSSCG00000002996		100.279	-0.0333656	0.167613	-0.199063	0.842214	0.926354	87.8825	0.146217	0.38265	0.382116	0.702375	0.995655	81.7678	-0.149512	0.375876	-0.397769	0.6908	0.979182	84.954	-0.00604592	0.233154	-0.0259311	0.979312	0.996079
ENSSSCG00000002997		10.2798	-1.09622	0.441928	-2.48054	0.0131182	0.0888701	9.45619	-1.04773	0.941699	-1.1126	0.265882	0.950817	11.092	-0.919893	0.901055	-1.02091	0.307299	0.906681	10.2308	-1.21662	0.675657	-1.80064	0.0717592	0.420295
ENSSSCG00000002998	SNRPA	337.111	-0.0767253	0.0937293	-0.818584	0.413024	0.661037	291.984	0.00680481	0.254389	0.0267496	0.978659	0.998818	301.094	-0.106243	0.272861	-0.389368	0.697004	0.979188	296.225	-0.0490446	0.165881	-0.295662	0.767488	0.947069
ENSSSCG00000003000	ITPKC	180.065	0.00513637	0.145844	0.0352182	0.971906	0.985299	157.479	0.359909	0.289169	1.24463	0.213267	0.915943	156.849	-0.163593	0.323602	-0.505539	0.613181	0.969363	157.141	0.138995	0.215359	0.645411	0.518661	0.84554
ENSSSCG00000003013	B9D2	49.6216	-0.0499142	0.221887	-0.224953	0.822016	0.91552	52.4581	0.437081	0.38494	1.13545	0.256185	0.944599	51.1557	-0.0295214	0.449281	-0.0657081	0.94761	0.998416	51.832	0.202745	0.242926	0.834596	0.403945	0.783982
ENSSSCG00000003015	EXOSC5	436.5	0.143282	0.106988	1.33924	0.180493	0.433053	448.388	0.376269	0.192382	1.95584	0.0504839	0.604422	443.32	0.0499802	0.316006	0.158162	0.874329	0.99083	445.891	0.217202	0.166703	1.30293	0.192599	0.615377
ENSSSCG00000003016	CCDC97	607.452	0.114533	0.102492	1.11748	0.263788	0.528646	389.281	0.0251128	0.200305	0.125373	0.900228	0.998795	438.149	0.192461	0.230301	0.835695	0.403326	0.929415	412.428	0.112055	0.125651	0.891794	0.372503	0.764169
ENSSSCG00000003017	TGFB1	6109.56	0.205319	0.103643	1.98101	0.0475899	0.199216	4146.54	0.0916046	0.238488	0.384105	0.700901	0.995655	4103.28	0.362596	0.245009	1.47993	0.138892	0.789927	4125.1	0.216256	0.170229	1.27038	0.203948	0.627535
ENSSSCG00000003018	LIPE	468.618	0.0151492	0.103112	0.14692	0.883196	0.94653	387.036	-0.140028	0.213422	-0.656106	0.511756	0.990567	401.386	0.194805	0.233171	0.83546	0.403459	0.929415	393.78	0.0236001	0.133087	0.177328	0.859251	0.973405
ENSSSCG00000003021	MEGF8	1117.5	-0.107745	0.0843737	-1.277	0.201602	0.459444	732.958	-0.0259824	0.235691	-0.11024	0.912219	0.998795	921.821	-0.00354511	0.200742	-0.01766	0.98591	0.998768	822.65	-0.0189879	0.142609	-0.133147	0.894077	0.981248
ENSSSCG00000003024	PRR19	72.546	0.0925273	0.212789	0.434831	0.663685	0.830005	65.7792	0.0361082	0.37919	0.0952245	0.924137	0.998795	74.9155	0.419171	0.390491	1.07345	0.283071	0.899985	70.1175	0.229661	0.220717	1.04052	0.298098	0.708687
ENSSSCG00000003030	CIC	2954.61	-0.0198626	0.080115	-0.247927	0.804191	0.906484	1817.04	-0.0759906	0.198782	-0.382281	0.702253	0.995655	1893.13	0.134454	0.187677	0.716415	0.473735	0.951137	1852.82	0.0282856	0.111423	0.253857	0.799606	0.955398
ENSSSCG00000003035		873.645	0.0132792	0.105945	0.12534	0.900254	0.953379	584.545	0.10471	0.228843	0.457564	0.647266	0.995655	665.966	-0.207742	0.365771	-0.567957	0.570064	0.96598	623.106	-0.0583843	0.202537	-0.288265	0.773144	0.947975
ENSSSCG00000003037		350.82	-0.109591	0.167638	-0.653735	0.513282	0.736833	285.138	-0.227813	0.321676	-0.708206	0.478817	0.98867	284.515	0.0721321	0.353452	0.204079	0.838292	0.990719	284.745	-0.102837	0.235651	-0.436394	0.662551	0.908639
ENSSSCG00000003038	GRIK5	29.2917	-0.516759	0.345485	-1.49575	0.134719	0.365639	31.0238	-0.834388	0.544677	-1.5319	0.125548	0.810743	24.3452	-0.0249182	0.555691	-0.0448417	0.964233	0.998768	27.8378	-0.517126	0.34964	-1.47902	0.139134	0.543667
ENSSSCG00000003040	ARHGEF1	550.159	-0.187833	0.086475	-2.17211	0.0298476	0.148192	455.252	-0.184332	0.197655	-0.932595	0.351029	0.967942	475.813	-0.268654	0.283435	-0.947851	0.343205	0.916618	464.893	-0.222828	0.135667	-1.64247	0.100493	0.489556
ENSSSCG00000003042		29572.5	0.245395	0.107771	2.277	0.0227861	0.126267	33678.2	0.197335	0.195884	1.00741	0.313739	0.960992	27332.5	0.405773	0.310285	1.30774	0.190961	0.836247	30654.3	0.280328	0.242457	1.1562	0.247601	0.664989
ENSSSCG00000003046		700.815	0.384801	0.121011	3.17989	0.00147331	0.0199782	673.947	0.384638	0.235148	1.63573	0.101896	0.771969	659.703	0.516422	0.221369	2.33285	0.0196558	0.457166	667.094	0.44744	0.144953	3.0868	0.00202326	0.0597971
ENSSSCG00000003051	CD177	27.7538	-0.684611	0.437854	-1.56356	0.117921	0.339583	27.0326	-0.630428	0.672329	-0.937678	0.34841	0.967942	30.5081	-1.74211	0.937117	-1.85901	0.0630251	0.654621	28.6558	-1.1068	0.556778	-1.98787	0.0468261	0.348083
ENSSSCG00000003054	ZNF575	58.964	-0.00890185	0.199626	-0.0445926	0.964432	0.981983	38.0859	0.114922	0.473651	0.24263	0.808292	0.996517	28.3106	-0.263655	0.874456	-0.301508	0.763027	0.98534	33.4219	-0.0546939	0.437428	-0.125035	0.900496	0.982846
ENSSSCG00000003055	XRCC1	578.793	-0.0956521	0.107898	-0.886505	0.375345	0.631999	477.639	-0.152675	0.227576	-0.670874	0.502301	0.989825	498.731	-0.202355	0.289899	-0.698018	0.485166	0.952351	487.541	-0.175196	0.152666	-1.14758	0.251142	0.669696
ENSSSCG00000003059	ZNF428	201.043	-0.0384131	0.110951	-0.346218	0.729179	0.869115	217.888	-0.0286924	0.24218	-0.118475	0.905691	0.998795	208.434	-0.133492	0.270771	-0.493007	0.622008	0.972131	213.336	-0.0931904	0.155781	-0.598215	0.549697	0.862127
ENSSSCG00000003061	CADM4	110.244	0.296235	0.185895	1.59357	0.111033	0.327323	112.612	0.400359	0.357062	1.12126	0.262178	0.949233	103.066	0.103141	0.452181	0.228096	0.819572	0.989273	108.033	0.251383	0.262284	0.958436	0.337843	0.740223
ENSSSCG00000003063	PHLDB3	54.1634	-0.208637	0.211472	-0.986596	0.32384	0.587455	50.5726	-0.182301	0.452299	-0.403055	0.686908	0.995655	44.2964	0.122344	0.601853	0.20328	0.838916	0.990806	47.5774	-0.0708563	0.342404	-0.206938	0.836058	0.967607
ENSSSCG00000003064	ETHE1	538.416	0.230491	0.110123	2.09304	0.0363453	0.168339	562.669	0.179972	0.187589	0.959396	0.337359	0.967942	558.047	0.139008	0.26131	0.531965	0.59475	0.966821	560.351	0.162249	0.129316	1.25467	0.209597	0.631851
ENSSSCG00000003068	SMG9	631.708	-0.167769	0.108103	-1.55193	0.120678	0.344028	480.826	-0.118068	0.213846	-0.552118	0.580867	0.993215	476.741	-0.0430226	0.32074	-0.134136	0.893295	0.991734	478.78	-0.0819703	0.1666	-0.492018	0.622707	0.895935
ENSSSCG00000003069	KCNN4	362.61	0.118678	0.140025	0.847548	0.39669	0.649499	421.521	-0.0689859	0.256541	-0.268908	0.788001	0.995655	399.268	0.491683	0.321103	1.53123	0.125712	0.770338	410.878	0.192755	0.235226	0.819446	0.412532	0.788497
ENSSSCG00000003070	ZNF45	158.082	0.166806	0.126231	1.32144	0.186356	0.440884	136.556	0.0848661	0.294458	0.288211	0.773185	0.995655	143.368	0.134549	0.276253	0.487051	0.626222	0.973578	139.758	0.10714	0.14897	0.719206	0.472014	0.822982
ENSSSCG00000003072	ZNF283	314.477	-0.0672353	0.124858	-0.538495	0.590235	0.786902	261.173	-0.201965	0.229533	-0.879893	0.378918	0.976796	275.754	-0.0165786	0.273124	-0.0606999	0.951598	0.998416	268.03	-0.108811	0.135143	-0.805149	0.420734	0.793947
ENSSSCG00000003076		15.7704	-0.147845	0.370872	-0.398642	0.690157	0.845925	14.7905	-0.284365	0.78947	-0.360197	0.7187	0.995655	18.2322	0.0516025	0.829582	0.062203	0.950401	0.998416	16.4211	-0.0986032	0.496164	-0.198731	0.842473	0.969216
ENSSSCG00000003079		128.448	0.814621	0.324535	2.51012	0.012069	0.0840099	100.298	-0.118424	0.355927	-0.332721	0.739345	0.995655	157.292	1.32296	0.589481	2.24427	0.0248148	0.495146	127.379	0.767744	0.415851	1.8462	0.0648631	0.404372
ENSSSCG00000003085	CLPTM1	967.009	0.0961349	0.0841309	1.14268	0.253171	0.51841	811.041	-0.0172936	0.174278	-0.0992296	0.920956	0.998795	769.035	0.18398	0.197144	0.933224	0.350704	0.920068	790.836	0.0814367	0.116484	0.699123	0.484475	0.83059
ENSSSCG00000003088	APOE	44.4436	-0.927515	0.45346	-2.04542	0.0408139	0.18128	44.3782	-0.822295	0.575926	-1.42778	0.153355	0.854239	74.2129	-1.70209	0.898714	-1.89391	0.0582366	0.646812	58.4902	-1.30162	0.55776	-2.33365	0.0196142	0.22497
ENSSSCG00000003089	TOMM40	505.028	0.0270078	0.158332	0.170577	0.864557	0.937495	544.519	0.254806	0.264454	0.963516	0.335289	0.967942	521.406	-0.218293	0.333722	-0.654117	0.513037	0.958922	533.283	0.0378836	0.216426	0.175042	0.861047	0.973718
ENSSSCG00000003090		33.7174	-0.681355	0.469083	-1.45253	0.146355	0.383741	31.2512	-0.77086	0.53645	-1.43697	0.150727	0.850123	35.6175	-1.03431	0.960649	-1.07668	0.281625	0.899985	33.3047	-0.912482	0.510606	-1.78706	0.0739281	0.427242
ENSSSCG00000003091	IRF2BP1	448.788	0.27597	0.173633	1.58938	0.111974	0.328629	424.181	0.312849	0.259533	1.20543	0.228037	0.927131	465.874	0.131496	0.352762	0.372761	0.709326	0.981374	443.86	0.225813	0.196305	1.15032	0.250014	0.668477
ENSSSCG00000003093	SYMPK	1450.1	-0.0153259	0.0795275	-0.192712	0.847184	0.928486	1231.18	-0.0246926	0.16217	-0.152264	0.878979	0.998795	1340.38	0.0799563	0.196515	0.40687	0.684103	0.979182	1282.82	0.0303975	0.0860065	0.353433	0.723764	0.932679
ENSSSCG00000003098	PPP5C	713.655	0.130383	0.127981	1.01877	0.308314	0.573183	726.437	0.309104	0.186709	1.65554	0.097815	0.761065	626.498	-0.132133	0.332509	-0.397381	0.691087	0.979182	678.685	0.115696	0.20186	0.573149	0.566544	0.869923
ENSSSCG00000003100	CCDC61	292.161	-0.0811982	0.110538	-0.734571	0.462601	0.699046	274.459	-0.0811078	0.20372	-0.398133	0.690532	0.995655	273.628	0.149652	0.270986	0.552249	0.580778	0.966659	273.998	0.0330628	0.132439	0.249646	0.802861	0.956984
ENSSSCG00000003103	FKRP	239.118	0.0442004	0.116764	0.378545	0.705026	0.854554	182.282	0.118402	0.267927	0.44192	0.658547	0.995655	207.713	0.1891	0.280387	0.674424	0.500042	0.95618	194.331	0.156283	0.144898	1.07858	0.280777	0.696064
ENSSSCG00000003104	STRN4	2438.05	0.00726978	0.0734384	0.0989915	0.921145	0.963094	2252.42	0.104147	0.15881	0.655798	0.511954	0.990567	2276.18	-0.0489753	0.194555	-0.25173	0.80125	0.988618	2263.18	0.0337224	0.110164	0.30611	0.759521	0.945284
ENSSSCG00000003105	SLC1A5	1434.01	0.314225	0.139689	2.24947	0.0244829	0.131617	1493.1	0.323199	0.27246	1.18622	0.235534	0.931231	1536.13	0.617725	0.367904	1.67904	0.0931444	0.718625	1513.25	0.465696	0.229607	2.02823	0.0425372	0.331756
ENSSSCG00000003106	AP2S1	1645.81	0.365285	0.113583	3.21601	0.00129987	0.0183164	1833.1	0.239939	0.267025	0.898565	0.368885	0.971756	1701.08	0.568337	0.41637	1.36498	0.172259	0.81901	1769.94	0.388378	0.252742	1.53666	0.124378	0.523171
ENSSSCG00000003107	ARHGAP35	3800.23	-0.038729	0.115133	-0.336384	0.736581	0.872915	2730.82	-0.0513988	0.212323	-0.242078	0.80872	0.996517	3168.67	-0.158958	0.291961	-0.54445	0.586132	0.966821	2938.5	-0.103392	0.164886	-0.627052	0.530625	0.850944
ENSSSCG00000003109	TMEM160	47.8994	0.633468	0.28554	2.21849	0.0265213	0.137781	61.2685	0.38251	0.476	0.803593	0.421632	0.983944	43.1888	1.04077	0.470789	2.21071	0.0270563	0.508862	52.652	0.67965	0.348985	1.9475	0.0514743	0.362634
ENSSSCG00000003110	ZC3H4	2269.5	0.0965554	0.0892175	1.08225	0.279143	0.544481	1532.19	0.0237688	0.208811	0.113829	0.909373	0.998795	1557.18	0.184607	0.217593	0.848406	0.396212	0.927129	1543.64	0.105815	0.12572	0.841671	0.399972	0.781451
ENSSSCG00000003111	SAE1	1378.23	0.125501	0.120306	1.04318	0.296863	0.56175	1355.78	0.149622	0.211505	0.707416	0.479308	0.98867	1423.98	-0.121838	0.197001	-0.618463	0.53627	0.962346	1387.81	0.0200441	0.126721	0.158174	0.874319	0.976612
ENSSSCG00000003112		100.645	-0.258816	0.15062	-1.71834	0.0857351	0.280945	71.5326	-0.617904	0.389156	-1.58781	0.11233	0.790795	70.9358	0.0374356	0.349668	0.10706	0.914741	0.99507	71.2287	-0.290545	0.250703	-1.15892	0.246489	0.664546
ENSSSCG00000003113	C5AR2	143.297	0.788161	0.469433	1.67896	0.093159	0.295218	73.5751	0.529305	0.454009	1.16585	0.243676	0.937534	153.187	1.72618	0.574607	3.00411	0.00266362	0.202301	111.425	1.11366	0.443706	2.50991	0.0120762	0.17186
ENSSSCG00000003114	DHX34	582.055	0.376217	0.117874	3.19167	0.0014145	0.0193981	481.406	0.455645	0.204741	2.22547	0.0260499	0.458718	508.944	0.523146	0.325301	1.60819	0.107793	0.73981	494.432	0.495109	0.207261	2.38882	0.0169028	0.20709
ENSSSCG00000003119	ZNF541	24.1096	-1.7189	0.555809	-3.0926	0.00198411	0.0246421	19.3862	-2.63105	0.99894	-2.63384	0.00844258	0.266722	29.3501	-3.08006	1.15309	-2.67113	0.00755955	0.306437	24.0924	-2.87681	0.753748	-3.81668	0.000135262	0.0104167
ENSSSCG00000003120	NAPA	4951.9	0.31532	0.226281	1.39349	0.163473	0.408944	4162.05	-0.0503539	0.188346	-0.267348	0.789202	0.995655	4298.83	-0.151651	0.352715	-0.429953	0.66723	0.978874	4226.58	-0.112665	0.206305	-0.546108	0.584992	0.877065
ENSSSCG00000003121	KPTN	7.18808	0.301814	0.479621	0.629275	0.529169	NA	5.69448	1.19534	1.14673	1.04239	0.297231	NA	5.00291	0.37929	1.14155	0.332258	0.739695	NA	5.36367	0.82544	0.618222	1.33518	0.181817	NA
ENSSSCG00000003128	LIG1	843.28	-0.098332	0.12613	-0.779606	0.435623	0.67853	854.69	0.101534	0.21962	0.462318	0.643853	0.995655	868.162	-0.381912	0.266464	-1.43326	0.151783	0.807428	860.737	-0.123604	0.178186	-0.693679	0.487883	0.832663
ENSSSCG00000003129	ZSWIM9	28.4212	-0.210908	0.257026	-0.82057	0.411891	0.660264	32.6066	0.215789	0.480207	0.449366	0.653168	0.995655	22.0701	-0.880951	0.800159	-1.10097	0.27091	0.898457	27.5759	-0.2022	0.446809	-0.452541	0.650879	0.904793
ENSSSCG00000003132		739.569	0.0215363	0.1386	0.155384	0.876519	0.942811	466.287	0.0105117	0.277064	0.0379398	0.969736	0.998818	537.248	-0.146623	0.284707	-0.514996	0.606555	0.967921	499.918	-0.0679804	0.17599	-0.386275	0.699293	0.923646
ENSSSCG00000003134	GRWD1	310.724	0.0979503	0.128364	0.763064	0.445425	0.685515	324.257	0.446275	0.212942	2.09575	0.0361041	0.532289	310.557	-0.147016	0.228773	-0.64263	0.520465	0.9597	317.678	0.167953	0.15319	1.09637	0.272917	0.688408
ENSSSCG00000003135	KCNJ14	16.3575	-1.0243	0.28558	-3.58673	0.000334847	0.0069344	14.2655	-0.909398	0.678156	-1.34099	0.179925	0.89212	13.8227	-0.809726	0.727731	-1.11267	0.265849	0.894734	14.0514	-0.902366	0.376124	-2.39912	0.0164345	0.203199
ENSSSCG00000003136		779.803	0.00384098	0.0875706	0.0438616	0.965015	0.982038	701.692	-0.19262	0.204279	-0.942926	0.345719	0.967942	742.65	0.0676601	0.249444	0.271244	0.786204	0.988618	720.964	-0.0634809	0.133888	-0.474135	0.635404	0.901716
ENSSSCG00000003137	PLEKHA4	15.7128	-0.307735	0.374936	-0.820767	0.411779	0.660264	13.22	-1.23525	0.762087	-1.62088	0.105044	0.778595	16.7125	-0.273811	0.729448	-0.375368	0.707387	0.981374	14.8752	-0.708082	0.431148	-1.64232	0.100525	0.489556
ENSSSCG00000003139	BCAT2	605.121	-0.0292559	0.0827071	-0.353729	0.723542	0.865806	500.744	0.0665278	0.184519	0.360547	0.718438	0.995655	581.734	-0.150008	0.250123	-0.599738	0.548681	0.96456	539.163	-0.0440139	0.152428	-0.288753	0.77277	0.947818
ENSSSCG00000003143	MAMSTR	36.264	-0.0298695	0.23881	-0.125077	0.900463	0.953514	29.2667	-0.0353291	0.524874	-0.0673096	0.946335	0.998795	35.3542	0.326961	0.61534	0.53135	0.595176	0.966821	32.1599	0.123277	0.345256	0.35706	0.721047	0.931536
ENSSSCG00000003144	DHDH	433.976	-0.145225	0.163364	-0.888967	0.374021	0.631178	423.192	-0.27437	0.232874	-1.17819	0.238722	0.932254	403.195	0.146329	0.357368	0.409463	0.6822	0.979182	413.536	-0.0737606	0.205248	-0.359373	0.719316	0.93142
ENSSSCG00000003148	DBP	65.307	0.130228	0.199936	0.651348	0.514822	0.738009	55.6088	-0.184447	0.457605	-0.403071	0.686896	0.995655	54.4707	0.34749	0.409514	0.848543	0.396135	0.927129	55.0515	0.0683637	0.2596	0.263343	0.792287	0.954384
ENSSSCG00000003150	NUCB1	24.1271	0.275222	0.33306	0.826343	0.408609	0.658642	23.7234	0.87372	0.673497	1.29729	0.194532	0.90134	12.6825	-0.190939	0.817857	-0.233463	0.815402	0.988618	18.462	0.484805	0.519408	0.933381	0.350623	0.74958
ENSSSCG00000003152	RUVBL2	756.898	-0.0296735	0.113751	-0.260865	0.794197	0.900172	772.301	0.0920567	0.188074	0.48947	0.624509	0.99491	852.087	-0.201942	0.230783	-0.875028	0.381559	0.9223	810.035	-0.0550998	0.119365	-0.461608	0.644362	0.902959
ENSSSCG00000003153	FTL	1.44736e+06	-0.0883878	0.162179	-0.545001	0.585753	0.783987	1.52392e+06	-0.289807	0.215035	-1.34772	0.177749	0.890483	1.53581e+06	0.30704	0.347827	0.882738	0.377378	0.92125	1.52935e+06	-0.00344349	0.209856	-0.0164088	0.986908	0.998039
ENSSSCG00000003154	GYS1	877.082	0.173372	0.116045	1.494	0.135176	0.366451	569.884	0.232895	0.255024	0.91323	0.361122	0.967942	684.387	0.183193	0.28738	0.637459	0.523826	0.959739	624.275	0.210733	0.17128	1.23034	0.218569	0.640144
ENSSSCG00000003155	PPP1R15A	4876.93	0.253166	0.230478	1.09844	0.272013	0.538234	4899.85	0.235342	0.162343	1.44966	0.147154	0.846799	4844.63	0.687423	0.452366	1.51962	0.128607	0.77393	4872.8	0.449349	0.248843	1.80575	0.0709571	0.419057
ENSSSCG00000003157	LIN7B	10.4669	-1.31617	0.397997	-3.307	0.00094302	0.014704	6.17509	-1.25479	1.2211	-1.02759	0.30414	NA	5.70097	-1.91925	1.10574	-1.73572	0.0826142	NA	5.94758	-1.63831	0.668342	-2.4513	0.0142341	NA
ENSSSCG00000003161	PRRG2	31.9734	-0.15275	0.2402	-0.635928	0.524823	0.744493	35.0366	0.134828	0.487978	0.276299	0.782318	0.995655	28.2538	-0.505741	0.60986	-0.829274	0.40695	0.930669	31.8016	-0.144807	0.334919	-0.432364	0.665477	0.910073
ENSSSCG00000003165	RPS11	248668	0.258875	0.118188	2.19037	0.0284973	0.144127	313190	0.27092	0.197926	1.3688	0.171063	0.879232	260484	0.470455	0.277031	1.6982	0.0894702	0.713228	288066	0.348062	0.191919	1.81359	0.0697407	0.415531
ENSSSCG00000003168	ALDH16A1	330.733	0.207443	0.107938	1.92188	0.0546208	0.215416	325.539	0.17008	0.225223	0.755159	0.450154	0.988535	327.894	0.229204	0.259006	0.884938	0.37619	0.920068	326.593	0.198692	0.138089	1.43887	0.150188	0.55972
ENSSSCG00000003169	PIH1D1	404.943	0.0530773	0.100097	0.53026	0.595932	0.790775	452.881	0.0887278	0.213717	0.415165	0.678021	0.995655	443.246	0.0629728	0.237225	0.265457	0.790658	0.988618	448.158	0.0785247	0.152297	0.515604	0.606131	0.887672
ENSSSCG00000003177	BCL2L12	56.1406	0.237541	0.180883	1.31323	0.189106	0.444201	58.7105	0.240935	0.396067	0.608318	0.542976	0.993215	61.332	0.300251	0.434181	0.691536	0.489229	0.953989	59.9384	0.272513	0.229867	1.18552	0.23581	0.655396
ENSSSCG00000003178	IRF3	1253.25	0.264463	0.0939521	2.81486	0.00487978	0.0458892	1376.95	0.322873	0.187426	1.72266	0.0849493	0.722926	1291.75	0.393104	0.214989	1.82848	0.0674768	0.674353	1336.11	0.355573	0.132974	2.67401	0.00749495	0.130167
ENSSSCG00000003183	RRAS	44.0625	0.231944	0.225173	1.03007	0.302976	0.56783	41.5988	0.162052	0.419693	0.386121	0.699407	0.995655	38.8149	-0.309121	0.523937	-0.589997	0.555193	0.96456	40.267	-0.0196134	0.286126	-0.0685482	0.945349	0.992488
ENSSSCG00000003187	FCGRT	2446.62	0.329492	0.066484	4.95596	7.19727e-07	6.60958e-05	2384.17	0.370796	0.160361	2.31226	0.0207635	0.416195	2455.62	0.354683	0.219981	1.61233	0.106889	0.73981	2417.66	0.362666	0.114429	3.16936	0.00152775	0.0517367
ENSSSCG00000003189	PRMT1	2365.68	0.153624	0.0917965	1.67353	0.0942234	0.297379	2558.49	0.178143	0.154344	1.15419	0.248421	0.940555	2492.43	-0.00317671	0.218326	-0.0145503	0.988391	0.998768	2526.44	0.0932747	0.1211	0.77023	0.441163	0.805522
ENSSSCG00000003192	IL4I1	319.004	-0.060239	0.11641	-0.517472	0.604827	0.79662	275.98	0.142506	0.234872	0.606741	0.544023	0.993215	234.631	-0.284789	0.266965	-1.06677	0.286077	0.899985	256.233	-0.042711	0.183407	-0.232876	0.815858	0.960709
ENSSSCG00000003193	TBC1D17	748.689	0.441261	0.125792	3.50785	0.000451746	0.00871804	720.424	0.294652	0.175464	1.67927	0.0930985	0.742696	617.844	0.69073	0.278209	2.48277	0.0130365	0.385576	671.489	0.467055	0.184549	2.53079	0.0113806	0.165277
ENSSSCG00000003194	AKT1S1	264.614	-0.116755	0.141704	-0.823936	0.409976	0.659318	201.587	0.0810002	0.264348	0.306415	0.759289	0.995655	237.122	-0.211134	0.333246	-0.633568	0.526363	0.959739	218.423	-0.0747232	0.180536	-0.413895	0.678951	0.915565
ENSSSCG00000003195	PNKP	3073.68	0.0735626	0.088455	0.831639	0.405613	0.656166	2966.4	0.000956305	0.148726	0.00642999	0.99487	0.999052	2922.03	0.263624	0.177876	1.48207	0.138322	0.789009	2944.58	0.125422	0.102444	1.22429	0.220842	0.64166
ENSSSCG00000003196	PTOV1	542.012	-0.215537	0.141661	-1.5215	0.128134	0.356404	496.616	-0.179812	0.335428	-0.536067	0.591912	0.993215	549.705	-0.452932	0.355113	-1.27546	0.202147	0.845762	521.629	-0.315319	0.235035	-1.34158	0.179731	0.599653
ENSSSCG00000003197	MED25	690.714	0.343833	0.143635	2.3938	0.0166747	0.103502	545.616	0.380857	0.279996	1.36022	0.173759	0.880878	418.804	0.559758	0.215798	2.5939	0.00948939	0.343195	485.178	0.455749	0.218524	2.08558	0.0370167	0.309568
ENSSSCG00000003198	FUZ	78.0433	-0.0567662	0.181964	-0.311964	0.755068	0.882902	80.9536	-0.118319	0.355736	-0.332603	0.739434	0.995655	76.8062	0.00937655	0.441904	0.0212185	0.983071	0.998768	78.97	-0.0350888	0.254632	-0.137802	0.890397	0.980216
ENSSSCG00000003199	AP2A1	2512.25	0.336445	0.108318	3.10609	0.00189581	0.0240396	2612.78	0.194627	0.175793	1.10714	0.268235	0.952369	2540.38	0.567205	0.279879	2.02661	0.0427027	0.582706	2577.96	0.369594	0.160355	2.30485	0.0211748	0.233334
ENSSSCG00000003201	ATF5	2464.38	-0.41858	0.237964	-1.759	0.0785767	0.266648	1856.75	-0.943676	0.383515	-2.4606	0.0138705	0.343959	1260.22	0.0806252	0.401061	0.20103	0.840675	0.99083	1572.57	-0.556614	0.378224	-1.47165	0.141116	0.546505
ENSSSCG00000003204	VRK3	536.483	0.00443852	0.108117	0.0410528	0.967254	0.983127	468.764	0.0133373	0.206653	0.0645397	0.94854	0.998795	485.003	0.291727	0.275592	1.05855	0.289806	0.899985	476.386	0.141349	0.153329	0.921866	0.356598	0.752682
ENSSSCG00000003211	NR1H2	2092.41	0.137829	0.086582	1.59188	0.111411	0.327928	2065.79	0.0157465	0.156124	0.100859	0.919662	0.998795	2113.67	0.26339	0.204853	1.28575	0.19853	0.842842	2088.17	0.136137	0.103674	1.31313	0.189138	0.610694
ENSSSCG00000003212	NAPSA	521.481	0.168909	0.0966855	1.747	0.0806381	0.271087	505.789	0.253767	0.22892	1.10854	0.267628	0.951757	420.438	0.235582	0.317947	0.740946	0.458726	0.947367	465.047	0.265614	0.232313	1.14334	0.252896	0.671124
ENSSSCG00000003214	KCNC3	41.3596	-0.205119	0.208025	-0.986031	0.324118	0.587455	28.7463	0.113171	0.540552	0.209361	0.834166	0.997873	22.9328	0.0333886	0.577513	0.0578145	0.953896	0.998416	25.9723	0.0659146	0.331518	0.198827	0.842398	0.969216
ENSSSCG00000003216	POLD1	454.133	-0.0432592	0.18103	-0.238962	0.811135	0.910715	469.032	-0.014857	0.272261	-0.0545689	0.956482	0.998818	408.672	-0.0516226	0.359348	-0.143657	0.885772	0.990984	440.106	-0.0279023	0.223355	-0.124924	0.900584	0.982846
ENSSSCG00000003217	ASPDH	3161.05	0.123064	0.208048	0.591519	0.554173	0.764147	3183.64	-0.205199	0.228809	-0.896815	0.369817	0.97178	3615.59	0.867106	0.506373	1.71239	0.0868257	0.710366	3388.63	0.315342	0.313598	1.00556	0.314628	0.723188
ENSSSCG00000003218	MYBPC2	99.7655	-0.602374	0.225447	-2.67191	0.00754218	0.0603919	89.3393	-0.451225	0.506729	-0.890466	0.373216	0.973266	52.4525	-0.0974767	0.410995	-0.237172	0.812523	0.988618	71.7648	-0.282856	0.363195	-0.778799	0.436098	0.803218
ENSSSCG00000003219	FAM71E1	48.9783	0.485935	0.221549	2.19335	0.0282823	0.14336	58.5342	0.40332	0.410053	0.983581	0.325322	0.967458	50.955	0.499418	0.50909	0.981002	0.326592	0.911941	54.9183	0.445594	0.284325	1.5672	0.117069	0.513419
ENSSSCG00000003222	SYT3	170.752	-0.0369002	0.173787	-0.21233	0.83185	0.920721	130.491	0.113665	0.301233	0.377332	0.705927	0.995655	130.773	0.181604	0.363123	0.500118	0.616992	0.970979	130.601	0.15273	0.209289	0.729759	0.465537	0.819646
ENSSSCG00000003230		31.7119	-0.634181	0.27974	-2.26704	0.0233878	0.128413	29.7161	-1.0365	0.608551	-1.70322	0.088527	0.733106	27.7411	-0.058385	0.537933	-0.108536	0.913571	0.994795	28.7682	-0.506868	0.378254	-1.34002	0.180239	0.600173
ENSSSCG00000003231	NKG7	1216.65	0.00720176	0.139551	0.0516068	0.958842	0.978818	835.416	0.218314	0.281654	0.775114	0.438272	0.983944	893.178	0.151421	0.332995	0.454724	0.649308	0.977132	862.7	0.162834	0.211815	0.768754	0.442039	0.805768
ENSSSCG00000003233	ZNF175	57.8697	-0.0042701	0.203866	-0.0209456	0.983289	0.990633	58.587	0.0641589	0.399334	0.160665	0.872358	0.998795	54.5697	-0.0591412	0.385075	-0.153584	0.877938	0.99083	56.6567	0.00746637	0.215325	0.0346748	0.972339	0.99484
ENSSSCG00000003234		9.00801	0.455976	0.458158	0.995236	0.319621	NA	5.79152	-0.567432	1.23608	-0.459058	0.646193	NA	7.21907	0.0582485	0.907435	0.0641903	0.948819	NA	6.46982	-0.139513	0.63587	-0.219404	0.826335	NA
ENSSSCG00000003235		230.556	-0.0805019	0.106574	-0.755359	0.450034	0.688652	154.993	-0.132932	0.271701	-0.48926	0.624658	0.99491	202.462	-0.143805	0.263762	-0.545205	0.585613	0.966821	177.535	-0.139417	0.157762	-0.883719	0.376848	0.767528
ENSSSCG00000003236		2283.43	0.589445	0.206927	2.84856	0.00439176	0.0430005	2145.9	0.807158	0.23917	3.37483	0.000738602	0.0540265	2321.8	0.705868	0.386967	1.8241	0.0681364	0.675715	2229.34	0.792694	0.225871	3.5095	0.000448958	0.0237022
ENSSSCG00000003238	SPACA6	10.807	0.142148	0.479837	0.296243	0.767045	0.88794	8.6463	0.464926	1.09157	0.425923	0.670164	0.995655	7.79261	1.13053	1.05286	1.07377	0.282926	NA	8.23695	0.676813	0.637357	1.06191	0.288278	0.701792
ENSSSCG00000003240		9.94432	-0.400605	0.487022	-0.82256	0.410758	0.659678	14.0454	-0.310059	0.842721	-0.367926	0.712929	0.995655	6.71202	-0.785273	1.1947	-0.657299	0.510989	NA	10.5528	-0.440069	0.669271	-0.657536	0.510836	0.843973
ENSSSCG00000003241	ZNF614	217.5	-0.0734985	0.171157	-0.429421	0.667617	0.832708	181.425	-0.19307	0.341543	-0.565286	0.571879	0.993215	239.006	-0.504288	0.436679	-1.15482	0.248162	0.880565	208.722	-0.362271	0.268051	-1.3515	0.176535	0.597628
ENSSSCG00000003247		158.799	0.565083	0.173098	3.26452	0.00109649	0.0161872	168.117	0.761537	0.393873	1.93346	0.0531796	0.614733	108.124	0.594685	0.372633	1.5959	0.110511	0.745006	139.568	0.702129	0.323471	2.1706	0.0299611	0.280796
ENSSSCG00000003248		48.9891	0.50759	0.235968	2.1511	0.0314686	0.153888	46.8449	0.619649	0.506287	1.22391	0.220987	0.923093	51.8126	0.650476	0.478917	1.35822	0.174393	0.821424	49.2143	0.620081	0.306972	2.01999	0.0433846	0.334876
ENSSSCG00000003251	NLRP12	399.602	1.42251	0.155627	9.14047	6.21814e-20	7.45559e-16	358.073	1.14182	0.201611	5.66348	1.48334e-08	1.53231e-05	430.5	1.43121	0.331924	4.31185	1.61898e-05	0.00957468	392.529	1.30739	0.226051	5.78361	7.3114e-09	7.03827e-06
ENSSSCG00000003253	MYADM	3923.34	-0.0472397	0.147229	-0.320859	0.748317	0.879565	1999.08	-0.125188	0.215472	-0.580993	0.561245	0.993215	2477.79	-0.0146473	0.321786	-0.0455187	0.963694	0.998768	2226.51	-0.0636272	0.180244	-0.353005	0.724085	0.932824
ENSSSCG00000003256	PRKCG	29.9595	-0.713149	0.317497	-2.24616	0.0246939	0.132074	17.4947	-1.22356	0.708442	-1.72712	0.0841469	0.719631	25.0763	-0.751043	0.808346	-0.929111	0.352832	0.920068	21.1017	-0.902732	0.464519	-1.94337	0.0519719	0.364425
ENSSSCG00000003257	CACNG6	8.84548	-0.00453925	0.560713	-0.0080955	0.993541	NA	6.24348	0.827301	1.21612	0.680278	0.496328	NA	11.5752	-0.685812	0.960004	-0.714384	0.474989	0.951327	8.7785	-0.0578759	0.740982	-0.078107	0.937743	0.99129
ENSSSCG00000003259	OSCAR	275.495	0.979491	0.274518	3.56803	0.00035967	0.00735693	141.005	1.09277	0.433803	2.51904	0.0117676	0.315597	196.507	0.891865	0.484191	1.84197	0.0654795	0.666765	167.404	1.02465	0.326827	3.13516	0.00171759	0.0557783
ENSSSCG00000003261		271.212	0.297241	0.139828	2.12576	0.0335233	0.159941	273.85	0.281522	0.278731	1.01001	0.312489	0.960992	240.931	0.586256	0.410745	1.4273	0.153494	0.809276	258.124	0.418671	0.248868	1.6823	0.0925104	0.473058
ENSSSCG00000003262	TFPT	213.137	0.077285	0.119969	0.64421	0.519439	0.740483	251.373	0.275614	0.218146	1.26344	0.206432	0.910151	249.542	0.0636314	0.265814	0.239383	0.810809	0.988618	250.432	0.171033	0.137923	1.24006	0.214952	0.638431
ENSSSCG00000003263	PRPF31	633.71	0.0602322	0.121421	0.496059	0.619853	0.805736	632.069	0.0287467	0.221719	0.129654	0.89684	0.998795	659.835	0.0281396	0.258301	0.108941	0.913249	0.994773	645.062	0.0297595	0.139189	0.213807	0.830697	0.966112
ENSSSCG00000003264	CNOT3	790.02	0.0186871	0.127424	0.146653	0.883406	0.946582	547.759	-0.0496181	0.247394	-0.200563	0.84104	0.997873	572.123	0.269723	0.273427	0.986455	0.32391	0.911283	559.233	0.111324	0.163761	0.679796	0.496633	0.836065
ENSSSCG00000003265	LENG1	139.72	-0.0123835	0.134991	-0.091736	0.926908	0.964948	147.599	-0.0310886	0.275358	-0.112903	0.910108	0.998795	171.742	-0.17946	0.293056	-0.612374	0.540291	0.962808	159.031	-0.105103	0.171888	-0.611464	0.540893	0.856788
ENSSSCG00000003266	TMC4	3.73057	-0.931242	0.683552	-1.36236	0.173085	NA	4.0759	-1.28856	1.36999	-0.94056	0.34693	NA	2.80921	-0.298108	1.58226	-0.188406	0.850558	NA	3.47203	-0.976881	0.867019	-1.12671	0.259864	NA
ENSSSCG00000003267	MBOAT7	824.358	0.355311	0.184042	1.9306	0.053532	0.213636	665.32	0.290026	0.211195	1.37326	0.169671	0.877966	702.106	0.545777	0.318497	1.7136	0.0866018	0.710366	682.699	0.446212	0.191327	2.33219	0.0196905	0.225462
ENSSSCG00000003268	TSEN34	339.758	0.0482915	0.133299	0.36228	0.717143	0.862255	311.549	0.00278698	0.258516	0.0107807	0.991398	0.999052	334.067	-0.185825	0.295655	-0.628522	0.529662	0.961362	322.187	-0.0881061	0.165062	-0.533776	0.593497	0.880922
ENSSSCG00000003269	LENG9	38.657	0.623958	0.349285	1.78639	0.0740368	0.257677	26.2243	0.0609611	0.610309	0.0998856	0.920435	0.998795	36.5841	1.9437	0.614429	3.16343	0.00155921	0.156969	31.1474	0.999219	0.457589	2.18366	0.0289871	0.276685
ENSSSCG00000003271	TTYH1	27.5652	0.082272	0.304814	0.269909	0.78723	0.897804	34.6342	0.203586	0.469658	0.433478	0.664668	0.995655	21.5496	0.28847	0.632086	0.456378	0.648118	0.977132	28.3987	0.293148	0.374541	0.782685	0.433812	0.802645
ENSSSCG00000003272		58.331	0.159657	0.22915	0.696736	0.485968	0.716628	64.6522	0.181121	0.376323	0.48129	0.63031	0.995655	56.484	-0.0957301	0.534597	-0.17907	0.857883	0.99083	60.7516	0.0882257	0.288908	0.305377	0.760079	0.945416
ENSSSCG00000003278		1269.08	0.368035	0.172755	2.13039	0.0331394	0.158904	1146.94	0.234067	0.36539	0.640596	0.521785	0.993041	949.591	0.527573	0.337748	1.56203	0.118281	0.75945	1052.76	0.322723	0.30852	1.04603	0.295545	0.7067
ENSSSCG00000003282		103.868	0.127041	0.213676	0.59455	0.552144	0.763379	82.8287	0.0536397	0.47403	0.113157	0.909906	0.998795	104.395	0.374024	0.475983	0.785792	0.43199	0.940229	93.0808	0.228604	0.319447	0.715625	0.474223	0.824203
ENSSSCG00000003286		14.9469	0.0285395	0.394673	0.0723118	0.942354	0.971274	19.0193	0.366301	0.603183	0.60728	0.543665	0.993215	11.1462	-0.372492	1.03448	-0.360076	0.71879	0.983197	15.2719	0.141203	0.549527	0.256954	0.797214	0.955398
ENSSSCG00000003288	HSPBP1	185.503	-0.0339381	0.116015	-0.292531	0.769881	0.889272	176.591	-0.253226	0.259473	-0.975924	0.329102	0.967942	177.687	0.0469452	0.271627	0.172829	0.862786	0.99083	177.064	-0.103945	0.160972	-0.64573	0.518454	0.84554
ENSSSCG00000003289	ISOC2	154.76	0.196403	0.131751	1.49071	0.136036	0.368109	161.925	0.312226	0.26467	1.17968	0.238126	0.932254	153.67	0.044256	0.263285	0.168092	0.866511	0.99083	157.957	0.184191	0.156254	1.17879	0.23848	0.657555
ENSSSCG00000003301	PPP6R1	3148.6	0.11125	0.081246	1.36929	0.170907	0.419244	2895.94	0.110404	0.155991	0.707763	0.479093	0.98867	2747.44	0.136747	0.203458	0.672115	0.50151	0.956278	2824.49	0.125468	0.114279	1.0979	0.272247	0.688408
ENSSSCG00000003302		2401.07	0.125309	0.200226	0.625834	0.531424	0.749068	1910.97	0.177666	0.305659	0.581257	0.561067	0.993215	2056.53	0.788018	0.417121	1.88918	0.0588677	0.64714	1979.85	0.474921	0.267037	1.77848	0.0753249	0.430184
ENSSSCG00000003317	ZNF787	62.3273	-0.185458	0.227837	-0.813994	0.415649	0.663393	71.929	0.0773114	0.437054	0.176892	0.859593	0.998795	46.3062	-0.614047	0.407972	-1.50512	0.132293	0.776942	59.7154	-0.148847	0.355123	-0.419142	0.675112	0.913979
ENSSSCG00000003322		78.1851	-0.0496314	0.203818	-0.243508	0.807612	0.908444	66.3373	-0.00153268	0.369025	-0.00415333	0.996686	0.999052	75.0771	-0.552157	0.42664	-1.2942	0.195597	0.839153	70.4741	-0.280333	0.233165	-1.2023	0.229249	0.649482
ENSSSCG00000003329	ACAP3	139.089	0.175493	0.152446	1.15119	0.249656	0.514941	130.385	0.480232	0.305062	1.57421	0.115439	0.798877	132.014	0.0800641	0.296981	0.269593	0.787473	0.988618	131.137	0.281951	0.197014	1.43112	0.152396	0.563658
ENSSSCG00000003331	TNFRSF4	329.836	1.13063	0.180245	6.27276	3.54694e-10	1.34946e-07	320.284	0.968515	0.272971	3.54806	0.000388083	0.0343825	386.789	1.65565	0.284169	5.82628	5.66774e-09	1.91145e-05	351.879	1.31093	0.196639	6.66668	2.6166e-11	7.05279e-08
ENSSSCG00000003332	SDF4	1935.55	0.109093	0.10658	1.02358	0.306032	0.571253	1937.15	-0.00108442	0.173494	-0.00625048	0.995013	0.999052	1947.38	0.319753	0.215795	1.48175	0.138407	0.789009	1941.54	0.14853	0.131183	1.13224	0.257535	0.674598
ENSSSCG00000003334	UBE2J2	840.032	0.221996	0.136778	1.62304	0.104581	0.315353	835.38	0.36344	0.185821	1.95586	0.0504816	0.604422	783.856	0.526893	0.382698	1.37679	0.168579	0.816549	810.713	0.440848	0.210045	2.09883	0.0358318	0.305057
ENSSSCG00000003338	PUSL1	142.655	0.0644504	0.173791	0.37085	0.71075	0.85821	140.732	0.155005	0.290564	0.533463	0.593713	0.99323	121.911	0.360137	0.356284	1.01081	0.312105	0.910769	131.755	0.249557	0.211679	1.17894	0.238422	0.657555
ENSSSCG00000003339	INTS11	912.845	0.122882	0.0940595	1.30643	0.191407	0.446762	933.065	0.251123	0.166905	1.50459	0.13243	0.825841	939.431	0.01145	0.195974	0.0584259	0.953409	0.998416	935.835	0.136923	0.100988	1.35584	0.17515	0.595968
ENSSSCG00000003341	TAS1R3	123.801	-0.300614	0.151189	-1.98834	0.0467745	0.197104	100.637	-0.183506	0.333248	-0.550658	0.581868	0.993215	114.674	-0.387802	0.293174	-1.32277	0.185912	0.828848	107.283	-0.290916	0.192027	-1.51498	0.129779	0.531942
ENSSSCG00000003342	DVL1	747.043	0.185843	0.125137	1.48511	0.137514	0.370525	725.303	0.0773878	0.172096	0.449679	0.652942	0.995655	613.853	0.372986	0.228963	1.62902	0.103308	0.73434	672.096	0.212829	0.162936	1.30621	0.19148	0.613678
ENSSSCG00000003343	ATAD3A	335.185	0.180406	0.125407	1.43857	0.150273	0.390251	354.092	0.187011	0.203802	0.917612	0.358822	0.967942	336.171	0.0759269	0.293305	0.258867	0.795738	0.988618	345.514	0.138166	0.152711	0.904755	0.365595	0.75872
ENSSSCG00000003344	VWA1	12.1193	0.593245	0.424449	1.39768	0.162209	0.407311	15.0987	0.00232997	0.765596	0.00304334	0.997572	0.999052	11.7829	0.972594	0.97235	1.00025	0.317189	0.911283	13.5169	0.188109	0.551138	0.34131	0.73287	0.935755
ENSSSCG00000003348	SSU72	423.184	0.144386	0.114085	1.2656	0.205656	0.464294	432.118	0.0879173	0.188082	0.467441	0.640185	0.995655	449.713	0.107176	0.218647	0.490179	0.624007	0.97266	440.385	0.0982859	0.10186	0.964909	0.33459	0.738344
ENSSSCG00000003350	MIB2	724.127	0.147704	0.112765	1.30984	0.190252	0.445705	749.936	0.0958099	0.189784	0.504835	0.613675	0.994186	724.43	0.177715	0.270774	0.656322	0.511617	0.958922	737.548	0.137946	0.14331	0.962568	0.335764	0.738632
ENSSSCG00000003352		485.164	-0.0657328	0.0820688	-0.800948	0.423162	0.669238	454.93	-0.137611	0.191845	-0.717306	0.473185	0.98867	465.482	-0.0469687	0.252378	-0.186105	0.852363	0.99083	459.809	-0.0913299	0.120226	-0.759655	0.447461	0.809769
ENSSSCG00000003353	SLC35E2B	269.372	0.220458	0.162463	1.35697	0.17479	0.425012	180.523	-0.172843	0.310147	-0.557296	0.577325	0.993215	237.8	0.599459	0.43287	1.38485	0.166099	0.814712	207.74	0.193009	0.278806	0.69227	0.488768	0.832877
ENSSSCG00000003354	CCNL2	3304.83	-0.0430686	0.069035	-0.623867	0.532715	0.749771	3025.51	0.0963047	0.151246	0.636741	0.524294	0.993041	3194.16	-0.138466	0.265079	-0.522358	0.601421	0.967434	3104.79	-0.0175957	0.128435	-0.137001	0.89103	0.980216
ENSSSCG00000003359	TPRG1L	229.215	0.265341	0.158641	1.67258	0.0944091	0.297414	224.499	0.0113211	0.244878	0.0462315	0.963126	0.998818	206.215	0.627604	0.308903	2.03172	0.0421819	0.581648	215.747	0.292963	0.201021	1.45738	0.145013	0.553125
ENSSSCG00000003360	WRAP73	521.393	-0.0829245	0.106483	-0.778761	0.436121	0.678917	537.225	0.0230618	0.19077	0.120888	0.90378	0.998795	554.329	-0.092268	0.238918	-0.386191	0.699355	0.979558	545.192	-0.0345131	0.118627	-0.290938	0.771099	0.947322
ENSSSCG00000003362	CEP104	1034.49	-0.317912	0.116302	-2.73352	0.00626619	0.0539022	713.576	-0.408058	0.172766	-2.36192	0.0181807	0.392412	761.494	-0.102048	0.202656	-0.50355	0.614578	0.969511	736.186	-0.255418	0.100782	-2.53436	0.0112652	0.163954
ENSSSCG00000003369	RPL22	24219.4	0.27009	0.0926523	2.91509	0.00355589	0.0369635	33822.9	0.227719	0.167248	1.36156	0.173336	0.880428	28204.8	0.336571	0.240533	1.39927	0.161731	0.811098	31144.2	0.28736	0.163268	1.76005	0.0783992	0.436949
ENSSSCG00000003376	PLEKHG5	135.533	0.259007	0.165587	1.56418	0.117776	0.3394	125.681	0.0512757	0.300211	0.170799	0.864382	0.998795	132.731	0.590484	0.400923	1.47281	0.140802	0.791815	129.014	0.317161	0.221993	1.4287	0.153091	0.564644
ENSSSCG00000003377	ACOT7	415.897	-0.232464	0.121774	-1.90898	0.0562646	0.219112	390.132	-0.1666	0.231624	-0.719268	0.471976	0.98867	420.221	-0.295014	0.318794	-0.925407	0.354754	0.920068	404.294	-0.224989	0.173012	-1.30043	0.193455	0.615909
ENSSSCG00000003379	KLHL21	89.4311	-0.300154	0.142917	-2.1002	0.0357116	0.166446	85.628	-0.419981	0.324959	-1.29241	0.196214	0.902748	71.8992	-0.234686	0.350528	-0.669521	0.503163	0.956278	79.0753	-0.334279	0.206154	-1.6215	0.10491	0.49457
ENSSSCG00000003382	TAS1R1	32.2864	-0.200591	0.242388	-0.827561	0.407919	0.658167	26.9298	-0.719005	0.598765	-1.20081	0.229824	0.928722	29.7307	0.0729998	0.488409	0.149465	0.881187	0.99083	28.2505	-0.223941	0.332114	-0.67429	0.500127	0.837918
ENSSSCG00000003383	ZBTB48	327.79	-0.174546	0.104743	-1.66642	0.0956299	0.299469	328.965	-0.268625	0.210074	-1.27872	0.200997	0.90342	333.299	0.0229563	0.264857	0.0866743	0.93093	0.997528	330.95	-0.125789	0.137108	-0.917447	0.358908	0.754362
ENSSSCG00000003384	DNAJC11	779.53	0.00536597	0.103444	0.051873	0.95863	0.978695	732.264	0.0573734	0.174805	0.328214	0.74275	0.995655	806.254	0.0871245	0.254876	0.341831	0.732478	0.983197	767.237	0.0737572	0.115794	0.63697	0.524145	0.848578
ENSSSCG00000003385	PARK7	2799.62	0.0575426	0.0981912	0.586026	0.557858	0.766164	3200.1	0.090502	0.169904	0.532667	0.594264	0.993263	3197.99	-0.195322	0.178033	-1.09711	0.272591	0.899815	3198.2	-0.048291	0.111858	-0.431717	0.665947	0.910078
ENSSSCG00000003386	TNFRSF9	16.8762	-0.441056	0.350661	-1.25778	0.20847	0.468236	16.9048	-0.566679	0.876414	-0.646588	0.517898	0.993041	16.8009	-0.360148	0.693523	-0.519302	0.60355	0.967921	16.8454	-0.422524	0.488902	-0.86423	0.387462	0.7745
ENSSSCG00000003393	TMEM201	195.236	-0.185071	0.163795	-1.12989	0.258521	0.523967	127.357	-0.291539	0.395702	-0.736762	0.461267	0.98867	150.68	0.00509776	0.407413	0.0125125	0.990017	0.998768	138.405	-0.131008	0.258449	-0.506901	0.612224	0.889911
ENSSSCG00000003395	PIK3CD	4646.17	0.29989	0.119635	2.50672	0.0121858	0.0846899	3836.42	0.451241	0.174379	2.5877	0.00966181	0.288331	3742.84	0.280757	0.286443	0.980151	0.327012	0.911941	3791.15	0.364905	0.179024	2.03831	0.0415194	0.327231
ENSSSCG00000003396	CLSTN1	913.934	-0.0429765	0.0901887	-0.476518	0.633706	0.8123	731.097	-0.193289	0.205664	-0.939829	0.347305	0.967942	857.266	0.00584419	0.361613	0.0161615	0.987106	0.998768	790.913	-0.0920578	0.192985	-0.477021	0.633347	0.900451
ENSSSCG00000003398	UBE4B	3893.03	-0.221903	0.139802	-1.58727	0.112453	0.329683	2746.44	-0.401915	0.219834	-1.82826	0.0675099	0.6756	2653.39	0.100462	0.21575	0.465642	0.641472	0.976787	2701.69	-0.160339	0.158647	-1.01067	0.312176	0.72212
ENSSSCG00000003400	NMNAT1	73.2878	-0.124591	0.255072	-0.488455	0.625227	0.808775	74.1423	-0.0616936	0.330664	-0.186575	0.851994	0.998795	80.7693	-0.383039	0.545512	-0.702165	0.482577	0.952351	77.2608	-0.20341	0.299764	-0.678568	0.497412	0.836438
ENSSSCG00000003401	KIF1B	590.333	-0.0146194	0.135318	-0.108038	0.913966	0.960175	410.075	-0.13263	0.246017	-0.53911	0.589811	0.993215	543.997	-0.0940558	0.324313	-0.290015	0.771804	0.986962	473.691	-0.109025	0.205077	-0.531629	0.594983	0.881745
ENSSSCG00000003402	PGD	1656.4	0.460211	0.105953	4.34354	1.40202e-05	0.000639359	1446.82	0.526372	0.206215	2.55253	0.0106942	0.303215	1520.6	0.492758	0.264518	1.86285	0.0624836	0.653827	1481.74	0.514662	0.160107	3.21448	0.00130681	0.0470907
ENSSSCG00000003403	CENPS	489.674	0.243368	0.155154	1.56856	0.116751	0.337779	682.092	0.348671	0.244503	1.42604	0.153856	0.854851	532.114	0.425853	0.401408	1.0609	0.288736	0.899985	610.611	0.386941	0.282666	1.3689	0.171031	0.590557
ENSSSCG00000003404	DFFA	449.403	0.168737	0.0991113	1.7025	0.0886616	0.286488	459.452	0.217785	0.180989	1.20331	0.228856	0.928722	480.176	-0.000617637	0.235723	-0.00262018	0.997909	0.999429	469.188	0.117584	0.124686	0.94304	0.34566	0.745563
ENSSSCG00000003405	PEX14	239.964	0.151172	0.113877	1.32751	0.18434	0.438491	239.573	0.155925	0.212329	0.734354	0.462733	0.98867	242.565	0.068902	0.283817	0.242769	0.808184	0.988618	240.949	0.119371	0.136443	0.874877	0.381641	0.771113
ENSSSCG00000003407	CASZ1	340.6	-0.298256	0.179575	-1.6609	0.0967344	0.301305	224.936	-0.721788	0.384009	-1.87961	0.0601608	0.648121	199.198	0.226666	0.378771	0.598425	0.549556	0.96456	212.639	-0.26231	0.291504	-0.899851	0.3682	0.761195
ENSSSCG00000003410	MASP2	14.5791	-0.546235	0.339351	-1.60965	0.107475	0.32074	11.2312	-0.895623	0.927366	-0.965771	0.334159	0.967942	12.7979	-0.244119	0.772169	-0.316148	0.75189	0.984711	11.9729	-0.514111	0.462169	-1.11239	0.265972	0.682876
ENSSSCG00000003412	EXOSC10	806.373	0.0484784	0.0781024	0.620703	0.534795	0.750861	689.705	0.088616	0.185796	0.476954	0.633395	0.995655	805.014	-0.0313484	0.224101	-0.139885	0.888751	0.991578	744.348	0.0305698	0.116186	0.263111	0.792465	0.954513
ENSSSCG00000003413	MTOR	1986.35	-0.0212192	0.0743786	-0.285286	0.775425	0.891364	1700.25	0.147473	0.179918	0.819668	0.412405	0.983944	1762.54	-0.0760564	0.190504	-0.399237	0.689719	0.979182	1729.45	0.0406184	0.103757	0.391476	0.695446	0.923284
ENSSSCG00000003419	MAD2L2	684.744	0.325292	0.124857	2.60531	0.00917899	0.0692507	766.168	0.630202	0.188416	3.34473	0.000823621	0.0572322	736.4	0.141234	0.228339	0.618527	0.536228	0.962346	751.794	0.391892	0.143809	2.72508	0.00642861	0.118197
ENSSSCG00000003421		431.806	-0.00429693	0.101427	-0.0423646	0.966208	0.982538	383.431	0.182309	0.276217	0.660019	0.509241	0.990567	419.018	-0.0727978	0.203254	-0.358163	0.720222	0.983197	400.263	0.0515507	0.152612	0.33779	0.735522	0.936664
ENSSSCG00000003428	MTHFR	748.588	0.122997	0.0846826	1.45245	0.146376	0.383741	597.224	0.0663941	0.289392	0.229426	0.818537	0.99681	738.982	0.189451	0.212622	0.891021	0.372918	0.920068	664.538	0.112251	0.220578	0.508896	0.610825	0.889203
ENSSSCG00000003429	CLCN6	252.363	-0.201819	0.137081	-1.47226	0.14095	0.376432	138.483	-0.244249	0.314796	-0.775895	0.437811	0.983944	210.948	0.0793514	0.258339	0.30716	0.758722	0.984862	172.937	-0.0449544	0.237134	-0.189573	0.849643	0.970916
ENSSSCG00000003432	KIAA2013	1696.82	0.162732	0.174497	0.932578	0.351038	0.610477	1463.54	-0.0965558	0.333028	-0.289933	0.771868	0.995655	1765.27	0.379493	0.329763	1.15081	0.249812	0.881134	1606.58	0.162912	0.256291	0.635653	0.525002	0.848847
ENSSSCG00000003433	PLOD1	174.53	0.0408833	0.232231	0.176045	0.860258	0.934966	157.079	0.00258767	0.27312	0.00947448	0.992441	0.999052	175.851	0.171898	0.495227	0.347109	0.728509	0.983197	165.983	0.0968514	0.262029	0.369621	0.711665	0.928899
ENSSSCG00000003434	MFN2	875.834	0.00591093	0.107646	0.0549109	0.956209	0.977714	595.355	-0.103375	0.316413	-0.326711	0.743887	0.995655	786.009	0.0918585	0.267905	0.342877	0.731691	0.983197	685.907	0.00262938	0.211989	0.0124034	0.990104	0.998039
ENSSSCG00000003435	MIIP	566.604	0.0780954	0.153461	0.508893	0.610827	0.800275	491.457	-0.0155122	0.29706	-0.0522191	0.958354	0.998818	645.614	0.259035	0.260376	0.994852	0.319808	0.911283	564.671	0.139608	0.198515	0.703258	0.481895	0.828803
ENSSSCG00000003438	VPS13D	5688.12	-0.0596133	0.0860149	-0.693058	0.488273	0.718356	4159.21	-0.0470593	0.173788	-0.270785	0.786556	0.995655	4861.7	0.0646413	0.218496	0.295847	0.767347	0.986348	4492.65	0.0106179	0.110476	0.0961102	0.923433	0.98873
ENSSSCG00000003439	DHRS3	628.554	0.417386	0.130694	3.19361	0.00140505	0.0192883	466.436	0.275679	0.266248	1.03542	0.300471	0.960992	513.951	0.534781	0.264955	2.01839	0.0435511	0.585492	488.961	0.40031	0.178796	2.23892	0.0251612	0.257703
ENSSSCG00000003458	CTRC	6476.62	0.187518	0.174279	1.07596	0.281943	0.547651	4996.58	-0.0524112	0.192034	-0.272926	0.78491	0.995655	5822.07	-0.152487	0.261033	-0.584168	0.559107	0.96456	5388.42	-0.104224	0.140022	-0.744343	0.456669	0.814082
ENSSSCG00000003459	CELA2A	14.1836	0.50281	0.365667	1.37505	0.169116	0.416412	19.0464	0.322306	0.890261	0.362035	0.717326	0.995655	10.1247	0.236052	0.904673	0.260926	0.79415	0.988618	14.7989	0.277341	0.694872	0.399125	0.689801	0.921637
ENSSSCG00000003460	CASP9	552.07	0.0823287	0.132241	0.622566	0.53357	0.750297	483.815	0.201509	0.299171	0.673558	0.500592	0.989825	576.493	-0.0984363	0.254054	-0.387462	0.698415	0.979188	527.795	0.0461157	0.185566	0.248514	0.803737	0.957029
ENSSSCG00000003461	RSC1A1	6460.94	0.0471239	0.108497	0.434334	0.664046	0.830276	5499.64	0.00756022	0.247475	0.0305494	0.975629	0.998818	6504.21	0.282949	0.300549	0.941442	0.346479	0.918822	5976.48	0.158325	0.198535	0.797464	0.425181	0.797186
ENSSSCG00000003464	DNAJC16	289.307	0.0783576	0.139195	0.562936	0.573479	0.775982	240.234	0.0457632	0.211541	0.216332	0.828729	0.997209	271.216	-0.0128173	0.312004	-0.0410808	0.967232	0.998768	254.932	-8.95364e-05	0.163972	-0.000546047	0.999564	0.999918
ENSSSCG00000003468	PLEKHM2	2123.7	-0.104566	0.090218	-1.15903	0.246443	0.512275	1961.03	-0.127148	0.161756	-0.786045	0.431841	0.983944	1834.53	-0.0543754	0.193568	-0.280911	0.778778	0.987551	1900.28	-0.0929993	0.116397	-0.798982	0.424301	0.796376
ENSSSCG00000003472	ARHGEF19	7.74766	0.141159	0.534617	0.264038	0.791751	NA	5.22138	-0.278302	1.21425	-0.229197	0.818716	NA	7.96907	0.655935	1.12419	0.583474	0.559574	NA	6.52884	0.215358	0.670824	0.321036	0.748183	NA
ENSSSCG00000003473	CPLANE2	17.8281	-0.188183	0.347156	-0.542071	0.587769	0.785344	19.5645	0.630485	0.599305	1.05203	0.292787	0.960911	16.8508	-0.148856	0.720756	-0.206528	0.836379	0.990149	18.2665	0.28824	0.376226	0.766135	0.443596	0.806872
ENSSSCG00000003477	NECAP2	2539.15	0.0823834	0.0654147	1.2594	0.207885	0.467602	2470.29	0.112444	0.175738	0.639842	0.522275	0.993041	2665.89	0.108829	0.270092	0.402933	0.686997	0.979182	2562.89	0.112489	0.13494	0.833625	0.404492	0.784479
ENSSSCG00000003478	CROCC	68.1875	-0.129709	0.179861	-0.721163	0.470809	0.706749	73.112	-0.226084	0.336559	-0.671752	0.501742	0.989825	65.1473	0.249855	0.398384	0.627171	0.530547	0.961778	69.3048	-0.0130963	0.227833	-0.0574819	0.954161	0.993601
ENSSSCG00000003479	MFAP2	7.38955	-0.0115243	0.505842	-0.0227824	0.981824	NA	4.89025	-1.82792	1.18152	-1.5471	0.12184	NA	8.53972	0.766698	1.10825	0.691809	0.489057	0.953989	6.62452	-0.158186	0.720329	-0.219602	0.826181	NA
ENSSSCG00000003483	PADI4	603.354	0.996179	0.393239	2.53326	0.0113006	0.0800474	401.961	0.956731	0.743559	1.28669	0.198202	0.902971	835.846	1.00339	0.570929	1.75746	0.0788389	0.693374	608.319	0.936648	0.542922	1.7252	0.0844914	0.4524
ENSSSCG00000003485	RCC2	2455.2	-0.117931	0.0726345	-1.62363	0.104455	0.31533	2195.1	-0.0663479	0.176364	-0.376198	0.70677	0.995655	2225.91	-0.244743	0.215744	-1.13442	0.256619	0.886555	2209.09	-0.150527	0.11434	-1.31649	0.18801	0.608916
ENSSSCG00000003486	ARHGEF10L	542.715	0.255616	0.129729	1.97039	0.0487937	0.202599	546.456	0.186835	0.241672	0.773091	0.439469	0.983944	624.179	0.497423	0.299436	1.6612	0.0966736	0.721909	583.36	0.343826	0.17194	1.99969	0.0455339	0.342407
ENSSSCG00000003488	UBR4	12934.9	-0.144093	0.125378	-1.14927	0.250445	0.515508	8352.57	-0.186379	0.220295	-0.846041	0.39753	0.983636	9798.72	0.0753853	0.2199	0.342816	0.731737	0.983197	9039.02	-0.0453191	0.150208	-0.301709	0.762874	0.945576
ENSSSCG00000003489	EMC1	1663.38	-0.0495883	0.0915837	-0.541454	0.588195	0.78555	1397.49	0.077347	0.155692	0.496794	0.619335	0.99491	1381.09	0.0516996	0.208362	0.248124	0.804039	0.988618	1389.37	0.0653127	0.101125	0.645858	0.518371	0.84554
ENSSSCG00000003491	AKR7A2	373.45	0.515534	0.101355	5.08641	3.64897e-07	3.91092e-05	351.39	0.511789	0.335768	1.52423	0.127451	0.815286	368.459	0.382062	0.421972	0.90542	0.365243	0.920068	359.461	0.444993	0.26417	1.68449	0.0920863	0.472375
ENSSSCG00000003492	SLC66A1	105.728	-0.211532	0.177597	-1.19108	0.233621	0.498223	81.8745	-0.434133	0.406556	-1.06783	0.285596	0.958858	102.531	0.140089	0.418909	0.334414	0.738067	0.983405	91.6848	-0.117582	0.270713	-0.434341	0.664041	0.909274
ENSSSCG00000003493	CAPZB	3630.86	0.0791134	0.0991924	0.797575	0.425117	0.671513	2763.77	0.00596904	0.163206	0.0365735	0.970825	0.998818	2984.55	-0.0546512	0.225488	-0.242369	0.808495	0.988618	2868.18	-0.0252911	0.110182	-0.229539	0.81845	0.962248
ENSSSCG00000003505	DDOST	2609.79	0.173319	0.0737098	2.35137	0.0187042	0.111478	2485.54	0.209498	0.175518	1.1936	0.232635	0.929272	2943.04	0.125732	0.180566	0.696323	0.486227	0.952351	2702.56	0.167227	0.094664	1.76654	0.0773058	0.434347
ENSSSCG00000003506	PINK1	2670.95	0.0462928	0.156897	0.295051	0.767955	0.888343	2639.02	-0.245183	0.184085	-1.3319	0.182893	0.899136	2521.44	0.572108	0.463693	1.23381	0.217275	0.861595	2582.58	0.141425	0.291664	0.484889	0.627755	0.897926
ENSSSCG00000003511	HP1BP3	6732.17	-0.143214	0.0759226	-1.88632	0.0592518	0.226073	5493.96	-0.174581	0.159008	-1.09794	0.272231	0.952738	6288.4	0.0043391	0.188927	0.0229671	0.981677	0.998768	5870.47	-0.0823694	0.10004	-0.823365	0.4103	0.787849
ENSSSCG00000003512	EIF4G3	4579.83	-0.149808	0.0697037	-2.14922	0.0316172	0.154444	3804.45	-0.190041	0.168159	-1.13013	0.258423	0.945372	4155.98	-0.170401	0.17603	-0.968018	0.333035	0.914521	3970.76	-0.179323	0.0813415	-2.20457	0.0274842	0.27
ENSSSCG00000003513	ECE1	1441.41	0.788157	0.178638	4.41203	1.02404e-05	0.000522456	1020.86	0.646883	0.275978	2.34397	0.0190798	0.40174	1157.99	1.06737	0.343003	3.11185	0.00185921	0.171534	1085.92	0.877513	0.26298	3.3368	0.000847481	0.0358041
ENSSSCG00000003514	HSPG2	44.1172	-0.0423038	0.241683	-0.175039	0.861049	0.935444	37.2846	-0.793683	0.524849	-1.51221	0.130479	0.82473	27.8634	0.637721	0.535096	1.19179	0.233344	0.87498	32.7922	-0.190771	0.3727	-0.511861	0.608748	0.889048
ENSSSCG00000003520		11401.1	0.0271215	0.0746475	0.363327	0.71636	0.861548	10116.1	-0.0147927	0.134974	-0.109597	0.912729	0.998795	11502.2	-0.0937001	0.1822	-0.514272	0.607062	0.967921	10773.2	-0.0540063	0.0675736	-0.799222	0.424162	0.796376
ENSSSCG00000003531	KDM1A	838.548	0.0519311	0.101056	0.513882	0.607334	0.798153	718.56	-0.155284	0.178432	-0.870271	0.384153	0.977046	843.412	0.0483146	0.237618	0.203329	0.838878	0.990806	777.734	-0.0506482	0.12176	-0.415968	0.677433	0.914733
ENSSSCG00000003532	LUZP1	535.744	0.318893	0.488068	0.653378	0.513512	0.737084	429.986	-0.155665	0.22441	-0.693665	0.487892	0.988754	535.169	-0.233979	0.529617	-0.441788	0.658643	0.977132	479.993	-0.230026	0.300929	-0.764387	0.444637	0.807488
ENSSSCG00000003539	GRHL3	163.639	0.469203	0.207162	2.26491	0.0235183	0.128876	157.576	0.817207	0.29988	2.72511	0.00642804	0.229042	93.3678	0.437059	0.501193	0.872038	0.383188	0.9223	126.991	0.678842	0.345137	1.96688	0.0491976	0.354819
ENSSSCG00000003543	NIPAL3	897.372	0.0921431	0.136234	0.676359	0.498813	0.725618	740.41	0.0359033	0.184563	0.194531	0.84576	0.997873	833.271	-0.120156	0.273042	-0.440064	0.659891	0.977482	784.443	-0.0366475	0.155791	-0.235234	0.814027	0.959564
ENSSSCG00000003549	LDLRAP1	2439.85	0.426528	0.131397	3.24611	0.00116993	0.0169889	2148.53	0.42326	0.218061	1.94101	0.052257	0.60938	2334.45	0.195167	0.254309	0.767441	0.442819	0.942969	2236.65	0.299092	0.156612	1.90976	0.0561635	0.37621
ENSSSCG00000003551	PAQR7	69.8207	-0.506103	0.235305	-2.15084	0.0314885	0.153929	50.5855	0.0346348	0.423531	0.0817761	0.934825	0.998795	68.892	-0.621684	0.477835	-1.30104	0.193244	0.838473	59.2698	-0.189524	0.423405	-0.447619	0.654428	0.905801
ENSSSCG00000003552	AUNIP	50.0292	-0.62244	0.355662	-1.75009	0.080103	0.270066	36.348	-1.37193	0.548481	-2.50132	0.012373	0.322908	52.8952	-0.616093	0.603472	-1.02091	0.307295	0.906681	44.1885	-0.890063	0.399395	-2.22853	0.0258454	0.261516
ENSSSCG00000003553	MTFR1L	847.27	-0.175231	0.0750668	-2.33433	0.0195783	0.114949	733.651	-0.105216	0.171018	-0.615229	0.538403	0.993215	951.509	-0.266528	0.202595	-1.31557	0.188319	0.833472	837.061	-0.19173	0.11833	-1.62029	0.105169	0.49457
ENSSSCG00000003554	SELENON	359.261	0.253202	0.156531	1.61758	0.105752	0.316947	232.215	0.37385	0.26354	1.41857	0.156025	0.85645	320.863	-0.00542121	0.424427	-0.012773	0.989809	0.998768	274.371	0.175036	0.276132	0.633884	0.526156	0.849184
ENSSSCG00000003555	HMGN2	198.55	-0.0033993	0.16354	-0.0207857	0.983417	0.990633	165.725	-0.000259533	0.287083	-0.000904035	0.999279	0.999723	200.21	0.244416	0.356402	0.685787	0.492847	0.95501	182.082	0.123032	0.198644	0.619357	0.535681	0.854142
ENSSSCG00000003558	RPS6KA1	3185.2	0.324492	0.112962	2.87257	0.00407151	0.0408562	2447.81	0.199202	0.146182	1.3627	0.172977	0.880428	2788.54	0.542857	0.202852	2.67612	0.00744789	0.304899	2609.42	0.374528	0.109803	3.41091	0.000647454	0.0297807
ENSSSCG00000003559	ARID1A	7060.69	-0.0411792	0.122145	-0.337134	0.736016	0.872694	4231.53	0.0591161	0.216758	0.272729	0.785061	0.995655	5072.74	0.0147055	0.340795	0.0431507	0.965581	0.998768	4630.84	0.0369008	0.187162	0.19716	0.843703	0.969216
ENSSSCG00000003561	ZDHHC18	1840.62	0.318803	0.1606	1.98508	0.0471361	0.198126	1243.28	0.18975	0.203027	0.934605	0.349992	0.967942	1458.69	0.0438767	0.250124	0.175419	0.86075	0.99083	1345.59	0.113407	0.150873	0.751671	0.452249	0.812015
ENSSSCG00000003564	GPATCH3	1416.21	-0.15978	0.0841088	-1.89968	0.0574753	0.221645	1166.67	-0.0739339	0.15822	-0.467287	0.640294	0.995655	1384.73	-0.0917712	0.232613	-0.394524	0.693194	0.979182	1270.05	-0.0837775	0.107584	-0.778717	0.436147	0.803218
ENSSSCG00000003566	NUDC	708.761	-0.167086	0.131303	-1.27253	0.203185	0.461237	770.901	-0.089022	0.194512	-0.457668	0.647191	0.995655	863.645	-0.322318	0.34677	-0.929487	0.352637	0.920068	814.624	-0.20692	0.184278	-1.12287	0.261494	0.678767
ENSSSCG00000003569	SLC9A1	1261.88	0.0281126	0.126958	0.221433	0.824756	0.9172	745.333	-0.0353729	0.175021	-0.202106	0.839834	0.997873	943.438	0.148339	0.313165	0.473675	0.635732	0.975546	839.462	0.0610479	0.158519	0.385114	0.700153	0.923646
ENSSSCG00000003570	WDTC1	9376.59	-0.162246	0.178334	-0.909788	0.362935	0.620948	5231.53	-0.47106	0.231346	-2.03617	0.0417334	0.56398	6349.53	0.36081	0.388461	0.92882	0.352983	0.920068	5762.68	-0.0303008	0.24686	-0.122745	0.902309	0.983485
ENSSSCG00000003572	SYTL1	306.668	0.0650694	0.113358	0.574019	0.565955	0.77046	282.164	0.24127	0.216862	1.11255	0.265901	0.950817	322.159	-0.0876768	0.270036	-0.324685	0.745419	0.983832	301.11	0.0734059	0.147045	0.499208	0.617633	0.893679
ENSSSCG00000003573	MAP3K6	7.9582	-0.497831	0.44145	-1.12772	0.259439	NA	7.55363	-1.24091	0.982731	-1.26272	0.20669	0.910895	7.39287	-0.403098	1.0688	-0.377149	0.706063	NA	7.47575	-0.673648	0.630971	-1.06764	0.285684	NA
ENSSSCG00000003577	WASF2	3600.09	0.0637751	0.138689	0.459844	0.645628	0.819248	2095.02	0.0134066	0.234905	0.0570722	0.954488	0.998801	2468.52	0.0879929	0.297643	0.295632	0.767511	0.986445	2272.28	0.0562112	0.182205	0.308506	0.757698	0.945013
ENSSSCG00000003578	FGR	2919.84	0.376259	0.140049	2.68664	0.00721757	0.0588543	2571.29	0.21327	0.177407	1.20215	0.229304	0.928722	3043.61	0.41729	0.246309	1.69417	0.090232	0.714241	2795.59	0.318716	0.128205	2.48598	0.0129195	0.179814
ENSSSCG00000003580	EYA3	1364.02	-0.173403	0.0741813	-2.33755	0.0194106	0.114219	1122.38	-0.131527	0.152843	-0.860536	0.389494	0.98064	1344.44	-0.0456364	0.194383	-0.234776	0.814383	0.988618	1227.74	-0.0858979	0.0879326	-0.97686	0.328638	0.734121
ENSSSCG00000003582	SMPDL3B	292.936	0.43755	0.217604	2.01077	0.0443502	0.190625	241.671	0.0635001	0.292775	0.21689	0.828294	0.996938	407.625	0.549506	0.468795	1.17217	0.241129	0.876066	320.567	0.366769	0.305916	1.19892	0.230559	0.649944
ENSSSCG00000003583	RPA2	553.659	0.0908446	0.130014	0.69873	0.484721	0.715582	537.638	0.427335	0.200663	2.12962	0.033203	0.514733	622.782	-0.319377	0.274666	-1.16279	0.244916	0.87755	577.932	0.0424231	0.19032	0.222904	0.82361	0.963797
ENSSSCG00000003584	THEMIS2	847.575	0.810306	0.110889	7.30736	2.7244e-13	3.39825e-10	767.179	0.818723	0.288827	2.83465	0.00458757	0.186404	827.264	0.823865	0.216898	3.79841	0.00014563	0.0357191	795.649	0.82196	0.166938	4.92375	8.49016e-07	0.000331428
ENSSSCG00000003586	EPB41	1.11772e+06	-0.272794	0.162833	-1.67529	0.0938764	0.296785	878520	-0.43294	0.220043	-1.96753	0.0491227	0.599155	1.03296e+06	0.287718	0.238031	1.20874	0.226761	0.868974	951805	-0.0603474	0.190321	-0.317082	0.751181	0.942145
ENSSSCG00000003589	SRSF4	1750.09	-0.250013	0.0826141	-3.02628	0.00247586	0.0287683	1313.31	-0.156502	0.179176	-0.873455	0.382415	0.976796	1511.33	-0.264786	0.290548	-0.911333	0.36212	0.920068	1407.14	-0.210548	0.145289	-1.44917	0.147289	0.556105
ENSSSCG00000003590	PTPRU	36.2853	0.445938	0.263369	1.69321	0.090416	0.289418	38.8592	0.248623	0.494436	0.502843	0.615075	0.994581	34.2158	0.894924	0.654012	1.36836	0.171199	0.81901	36.6462	0.531271	0.379409	1.40026	0.161436	0.577714
ENSSSCG00000003591	PUM1	5660.39	0.063274	0.0726376	0.871091	0.383704	0.639475	5060.67	0.0809964	0.164316	0.49293	0.622062	0.99491	5589.78	0.120125	0.200933	0.597837	0.549949	0.96456	5311.22	0.103192	0.0932543	1.10656	0.268482	0.68509
ENSSSCG00000003592	SDC3	57.9534	-0.161484	0.206543	-0.781839	0.434309	0.677831	44.0869	0.0162161	0.532971	0.0304259	0.975727	0.998818	53.8891	-0.594317	0.615932	-0.964906	0.334592	0.914536	48.7478	-0.209304	0.373733	-0.560035	0.575456	0.873942
ENSSSCG00000003596	SNRNP40	886.003	0.117233	0.0774686	1.5133	0.130203	0.35926	788.597	0.0793537	0.244355	0.324748	0.745372	0.995655	834.059	0.0700676	0.202143	0.346624	0.728874	0.983197	810.008	0.0808764	0.136875	0.590878	0.554602	0.86429
ENSSSCG00000003600	TINAGL1	210.389	1.35816	0.342257	3.96825	7.24019e-05	0.00220115	185.308	1.46361	0.356343	4.10732	4.00282e-05	0.00683673	232.061	1.7814	0.574872	3.09878	0.00194323	0.173603	207.536	1.72609	0.373513	4.62124	3.81456e-06	0.000842767
ENSSSCG00000003603	COL16A1	66.6297	0.420321	0.223114	1.88389	0.0595799	0.226353	53.206	0.754456	0.887866	0.84974	0.39547	0.98314	51.3557	0.399366	0.75831	0.526652	0.598435	0.966831	52.3148	0.583752	0.600608	0.971935	0.331083	0.735742
ENSSSCG00000003608	LCK	6655.94	-0.0166024	0.117028	-0.141866	0.887186	0.948245	6601.22	0.040351	0.165721	0.243487	0.807628	0.996517	7260.64	-0.2597	0.347592	-0.74714	0.454979	0.94651	6912.23	-0.110396	0.185844	-0.594027	0.552494	0.8628
ENSSSCG00000003610	IQCC	112.832	-0.308809	0.24667	-1.25191	0.210601	0.47156	123.471	-0.341091	0.388494	-0.877982	0.379953	0.976796	148.169	-0.454014	0.452982	-1.00228	0.31621	0.911283	135.14	-0.414558	0.279918	-1.481	0.138607	0.543191
ENSSSCG00000003612	EIF3I	1929.47	0.0697495	0.0908601	0.767658	0.44269	0.683651	1976.79	0.0614013	0.160336	0.382955	0.701753	0.995655	2083.94	-0.0821807	0.205659	-0.399597	0.689453	0.979182	2027.2	-0.00761831	0.0956276	-0.0796664	0.936503	0.991029
ENSSSCG00000003613	HDAC1	3936.05	-0.0212229	0.130504	-0.162623	0.870815	0.940452	3437.87	-0.183508	0.156978	-1.169	0.242402	0.935581	4018	-0.231226	0.288798	-0.800649	0.423335	0.936922	3712.9	-0.208773	0.155717	-1.34072	0.180012	0.599907
ENSSSCG00000003617	TXLNA	1113.82	-0.0340407	0.0786026	-0.433074	0.664961	0.830562	943.377	0.146084	0.155301	0.940652	0.346883	0.967942	1019.8	-0.135166	0.225366	-0.599762	0.548665	0.96456	979.445	0.00676965	0.104496	0.0647836	0.948346	0.992826
ENSSSCG00000003619	AZIN2	24.4466	0.652254	0.319131	2.04384	0.0409691	0.181789	33.0767	0.698695	0.666256	1.04869	0.294321	0.960992	19.6422	0.903572	0.605755	1.49165	0.135792	0.784175	26.6854	0.742006	0.461677	1.6072	0.108011	0.499071
ENSSSCG00000003620	TRIM62	144.441	-0.0137004	0.130121	-0.10529	0.916145	0.961339	120.892	0.156253	0.276321	0.565476	0.57175	0.993215	138.866	-0.0404665	0.378991	-0.106774	0.914968	0.995076	129.415	0.0565221	0.186386	0.303253	0.761697	0.945576
ENSSSCG00000003621	ZSCAN20	265.284	0.398335	0.0973144	4.09328	4.25318e-05	0.00146724	211.72	0.35034	0.222207	1.57664	0.114879	0.796772	224.459	0.332095	0.342601	0.969333	0.332379	0.914521	217.727	0.342881	0.159271	2.15281	0.0313336	0.284749
ENSSSCG00000003627	ZMYM4	2172.89	0.144836	0.0851222	1.7015	0.0888484	0.286744	1847.83	0.0529653	0.172218	0.307547	0.758427	0.995655	2238.43	0.223006	0.224793	0.992051	0.321173	0.911283	2033.33	0.138389	0.122832	1.12665	0.25989	0.677263
ENSSSCG00000003628	CLSPN	1383.05	0.0229596	0.101716	0.225722	0.821418	0.915237	1474.21	-0.0931357	0.221686	-0.420124	0.674395	0.995655	1576.44	0.0478272	0.188957	0.253112	0.800182	0.988618	1522.43	-0.0250314	0.132559	-0.188832	0.850225	0.970975
ENSSSCG00000003630	AGO1	3749.32	0.0561359	0.11229	0.49992	0.617131	0.804003	3049.76	-0.0276954	0.150749	-0.183719	0.854234	0.998795	3525.59	-0.0514442	0.231478	-0.222242	0.824125	0.989273	3275.5	-0.0470064	0.116176	-0.404615	0.68576	0.918961
ENSSSCG00000003634	ADPRHL2	207.525	0.112997	0.114029	0.990947	0.321711	0.586114	185.577	0.0197984	0.231471	0.0855326	0.931838	0.998795	202.663	0.0754821	0.243976	0.309384	0.75703	0.984862	193.665	0.0475925	0.110995	0.428779	0.668084	0.910861
ENSSSCG00000003637	MAP7D1	1619.23	0.200973	0.106865	1.88062	0.0600234	0.227216	1303.71	0.153536	0.152454	1.0071	0.313889	0.960992	1418.47	-0.000911278	0.283513	-0.00321424	0.997435	0.999429	1358.01	0.0738285	0.157387	0.469089	0.639006	0.901994
ENSSSCG00000003642	INPP5B	2504.1	0.0427953	0.131852	0.32457	0.745506	0.877733	2293.5	0.0931959	0.205332	0.453879	0.649916	0.995655	2306.1	-0.0983381	0.283447	-0.346936	0.728639	0.983197	2299.08	-0.00492643	0.165146	-0.0298309	0.976202	0.995707
ENSSSCG00000003643	SF3A3	1287.6	0.00599949	0.100693	0.0595818	0.952489	0.976474	1275.84	0.00741865	0.175063	0.0423769	0.966198	0.998818	1462.12	-0.142243	0.249967	-0.569049	0.569323	0.96598	1363.98	-0.0734824	0.127134	-0.57799	0.563271	0.86873
ENSSSCG00000003644	FHL3	553.583	0.387028	0.22638	1.70964	0.0873324	0.284358	438.379	0.161616	0.216057	0.748027	0.454444	0.98867	513.054	-0.0772976	0.378568	-0.204184	0.83821	0.990719	473.87	0.0343688	0.266569	0.12893	0.897413	0.981655
ENSSSCG00000003645	UTP11	478.743	0.014999	0.108946	0.137673	0.890499	0.949148	462.07	0.199316	0.19752	1.00909	0.31293	0.960992	493.08	-0.147555	0.240061	-0.614656	0.538782	0.962593	476.705	0.0278039	0.128219	0.216847	0.828328	0.965272
ENSSSCG00000003648	RRAGC	1171.07	0.159917	0.118458	1.34999	0.177019	0.427802	1005.18	0.0428785	0.162893	0.263232	0.792372	0.995655	1070.67	0.00655967	0.196475	0.0333867	0.973366	0.998768	1036.1	0.0255175	0.0859058	0.29704	0.766436	0.946852
ENSSSCG00000003650	GJA9	44.7786	0.255748	0.461483	0.554187	0.579451	0.780337	34.928	-0.37694	0.805933	-0.467706	0.639995	0.995655	52.7244	-0.121586	0.424201	-0.286624	0.7744	0.986962	43.3889	-0.220646	0.546612	-0.403661	0.686462	0.919261
ENSSSCG00000003651	RHBDL2	430.859	0.0413235	0.462438	0.0893601	0.928796	0.965785	382.018	-0.424722	0.394988	-1.07528	0.282249	0.956837	530.943	-0.591264	0.388247	-1.52291	0.127782	0.773252	452.823	-0.562462	0.383672	-1.466	0.142649	0.549745
ENSSSCG00000003652	AKIRIN1	1632.69	-0.0627236	0.062224	-1.00803	0.31344	0.578203	1294.64	-0.145643	0.219102	-0.664726	0.506226	0.989825	1610.52	-0.00198978	0.264315	-0.00752807	0.993994	0.999327	1444.66	-0.0692747	0.157114	-0.440921	0.65927	0.906539
ENSSSCG00000003653	NDUFS5	2221.45	0.0943319	0.109639	0.860389	0.389574	0.643699	2319.23	-0.0195741	0.239305	-0.0817958	0.934809	0.998795	2601.51	0.261534	0.224204	1.1665	0.243411	0.876853	2452.84	0.122301	0.14959	0.817574	0.4136	0.789643
ENSSSCG00000003654	MACF1	26764.1	-0.0614429	0.102335	-0.600407	0.548235	0.760052	23772.6	-0.071285	0.193813	-0.367803	0.71302	0.995655	25744.9	-0.0423112	0.238171	-0.177651	0.858997	0.99083	24706.5	-0.0562616	0.132434	-0.424827	0.670963	0.912285
ENSSSCG00000003655		234.056	-0.575895	0.158427	-3.63508	0.000277897	0.00605644	160.428	-0.644258	0.377348	-1.70733	0.0877603	0.730283	193.918	-0.69618	0.468577	-1.48573	0.13735	0.787796	176.311	-0.658334	0.293025	-2.24668	0.0246604	0.255064
ENSSSCG00000003660	PABPC4	5434.75	-0.017078	0.133901	-0.127542	0.898511	0.952399	4005.75	-0.22531	0.236419	-0.953011	0.340584	0.967942	4450.06	0.198621	0.348879	0.569312	0.569144	0.96598	4216.67	-0.0211155	0.22553	-0.0936262	0.925406	0.988951
ENSSSCG00000003663	HPCAL1	111.533	0.261896	0.197272	1.32759	0.184314	0.438491	60.2546	-0.451827	0.395161	-1.1434	0.252873	0.943664	82.2059	0.502406	0.369183	1.36086	0.173558	0.821192	70.6873	0.0977769	0.255254	0.383058	0.701677	0.92456
ENSSSCG00000003664		678.934	-0.131421	0.0958703	-1.37082	0.17043	0.418408	658.95	0.0366644	0.192879	0.19009	0.849239	0.998795	642.873	-0.363188	0.217995	-1.66604	0.0957056	0.719387	651.109	-0.149888	0.134904	-1.11107	0.266538	0.682914
ENSSSCG00000003667	TRIT1	570.829	-0.227691	0.104388	-2.18121	0.0291678	0.146481	490.785	-0.0520019	0.185004	-0.281085	0.778645	0.995655	611.948	-0.376245	0.283686	-1.32627	0.184749	0.828848	548.228	-0.223426	0.150991	-1.47973	0.138946	0.543357
ENSSSCG00000003669	MFSD2A	18.5094	-0.241502	0.321407	-0.75139	0.452418	0.690397	9.71682	0.262203	0.828236	0.31658	0.751562	0.995655	19.2309	-0.30888	0.736586	-0.41934	0.674967	0.979182	14.2372	-0.0129091	0.504174	-0.0256046	0.979573	0.996079
ENSSSCG00000003670	RLF	890.148	0.485351	0.13654	3.55464	0.000378495	0.00762487	720.339	0.402027	0.210479	1.91006	0.056126	0.631432	863.188	0.43498	0.275222	1.58047	0.114	0.750641	788.201	0.421723	0.147084	2.86723	0.00414079	0.0925462
ENSSSCG00000003672	CAP1	18404.7	0.094989	0.192656	0.49305	0.621977	0.807306	10406.1	-0.128526	0.182145	-0.705621	0.480424	0.98867	15868.4	-0.256038	0.304277	-0.841461	0.40009	0.928571	13003.2	-0.201781	0.190931	-1.05683	0.29059	0.703861
ENSSSCG00000003673	CEP192	3243.33	0.00640417	0.0628938	0.101825	0.918895	0.962575	2731.76	0.0190763	0.182655	0.104439	0.916821	0.998795	3114.34	0.00864005	0.212684	0.0406239	0.967596	0.998768	2913.03	0.015971	0.123099	0.129742	0.896771	0.981633
ENSSSCG00000003679	PPP4R1	1070.62	0.154494	0.0841304	1.83637	0.0663031	0.241425	996.536	0.120505	0.193725	0.622042	0.533915	0.993215	1020.4	0.184593	0.189824	0.972444	0.33083	0.914521	1007.67	0.151741	0.103776	1.4622	0.143685	0.551199
ENSSSCG00000003680	RALBP1	5672.57	0.187153	0.0973839	1.9218	0.0546305	0.215416	5733.16	0.00735606	0.147549	0.0498551	0.960238	0.998818	6287.09	0.109843	0.258396	0.425094	0.670768	0.97917	5995.74	0.0577781	0.120478	0.479574	0.63153	0.899422
ENSSSCG00000003682	ANKRD12	4312.06	0.0396259	0.108274	0.365977	0.714382	0.860324	3664.08	-0.0403955	0.184138	-0.219376	0.826357	0.99681	4409.83	0.0763675	0.213124	0.358325	0.7201	0.983197	4018.14	0.0176614	0.12465	0.141688	0.887327	0.980162
ENSSSCG00000003684	MTCL1	158.699	0.131534	0.204582	0.642937	0.520265	0.741026	137.467	-0.0764932	0.271069	-0.282191	0.777797	0.995655	126.519	-0.138458	0.343793	-0.402735	0.687143	0.979182	132.222	-0.119908	0.189766	-0.631874	0.527469	0.849184
ENSSSCG00000003687	EPB41L3	28.1445	1.17193	0.350524	3.34335	0.000827733	0.0133278	15.7916	1.03407	0.761057	1.35873	0.174233	0.882286	51.448	1.01135	0.655926	1.54187	0.123105	0.766875	32.7503	1.09023	0.57133	1.90824	0.0563604	0.37677
ENSSSCG00000003691	MYL12A	27968.7	0.257361	0.189568	1.35762	0.174585	0.424849	28984.8	0.0564975	0.209729	0.269383	0.787635	0.995655	31246.6	-0.198314	0.337374	-0.587817	0.556655	0.96456	30056.1	-0.0783901	0.203762	-0.384714	0.700449	0.923675
ENSSSCG00000003693	MYOM1	744.562	0.18328	0.501561	0.365419	0.714798	0.860475	566.088	-0.243247	0.306353	-0.794006	0.427192	0.983944	973.142	-0.628667	0.437615	-1.43657	0.150839	0.806777	759.713	-0.472739	0.302278	-1.56392	0.117836	0.514312
ENSSSCG00000003694	EMILIN2	4615.82	0.540793	0.158402	3.41405	0.000640049	0.0110687	3982.29	0.314318	0.252999	1.24237	0.2141	0.917358	4318.4	0.79452	0.41672	1.9066	0.0565719	0.641306	4141.58	0.551731	0.247192	2.232	0.0256152	0.260344
ENSSSCG00000003697	NDC80	473.085	-0.0933161	0.132808	-0.702636	0.482282	0.714278	467.837	-0.0745051	0.216834	-0.343605	0.731143	0.995655	532.252	-0.182826	0.293263	-0.623418	0.53301	0.962346	498.268	-0.113309	0.175357	-0.646161	0.518175	0.84554
ENSSSCG00000003699	GREB1L	344.17	-0.0943491	0.123606	-0.763304	0.445282	0.685515	317.214	-0.0927558	0.226267	-0.40994	0.68185	0.995655	386.398	0.147871	0.280837	0.526537	0.598515	0.966831	350.049	0.0400336	0.153593	0.260648	0.794364	0.954868
ENSSSCG00000003700	ESCO1	2832.32	-0.00195717	0.104552	-0.0187195	0.985065	0.99142	2686.24	-0.0898164	0.178017	-0.504538	0.613883	0.994272	3289.35	0.0524525	0.202535	0.25898	0.795651	0.988618	2972.57	-0.0148939	0.113784	-0.130896	0.895857	0.981631
ENSSSCG00000003701	SNRPD1	721.986	-0.285868	0.12213	-2.34068	0.0192485	0.113736	700.417	-0.227324	0.247818	-0.917303	0.358984	0.967942	861.123	-0.368892	0.271495	-1.35875	0.174227	0.821402	776.521	-0.301573	0.17431	-1.7301	0.0836127	0.44966
ENSSSCG00000003705	CABLES1	59.7532	0.191898	0.277838	0.690685	0.489763	0.718594	57.3139	-0.000940402	0.454419	-0.00206946	0.998349	0.999374	29.7208	0.338493	0.616653	0.54892	0.58306	0.966712	44.1635	0.331435	0.509305	0.65076	0.515202	0.844729
ENSSSCG00000003707	NPC1	862.038	0.100288	0.133684	0.750185	0.453143	0.691186	651.693	-0.00957385	0.182942	-0.0523327	0.958264	0.998818	890.362	0.47605	0.294294	1.6176	0.105749	0.73981	765.119	0.260285	0.187726	1.38651	0.16559	0.582272
ENSSSCG00000003708	ANKRD29	24.0715	0.414632	0.245153	1.69132	0.0907756	0.290138	24.3866	0.808877	0.519837	1.55602	0.119704	0.806072	22.4236	0.429263	0.582257	0.73724	0.460976	0.948063	23.4484	0.57083	0.35815	1.59383	0.110974	0.502892
ENSSSCG00000003709	LAMA3	117.167	0.125574	0.193795	0.647973	0.517002	0.738861	121.732	-0.0823763	0.339219	-0.242841	0.808129	0.996517	133.546	0.417013	0.446447	0.93407	0.350268	0.920068	127.352	0.165705	0.256272	0.646599	0.517891	0.84554
ENSSSCG00000003710	TTC39C	249.295	0.0837315	0.111189	0.753057	0.451415	0.689682	202.048	0.087042	0.229322	0.379562	0.704271	0.995655	270.932	0.125031	0.332467	0.376069	0.706865	0.981374	234.766	0.125684	0.194201	0.647187	0.517511	0.84554
ENSSSCG00000003711	CABYR	214.567	-0.565212	0.158614	-3.56345	0.000366013	0.00742963	160.551	-0.479638	0.267194	-1.7951	0.0726385	0.690189	197.381	-0.268868	0.332287	-0.809143	0.418433	0.932385	178.035	-0.331871	0.210119	-1.57944	0.114235	0.507927
ENSSSCG00000003712	OSBPL1A	2166.38	0.253876	0.0923503	2.74906	0.00597672	0.0523925	2273.69	0.116613	0.154987	0.752407	0.451806	0.98867	2278.31	0.198633	0.351853	0.564534	0.572391	0.966659	2275.58	0.153923	0.180742	0.851616	0.394427	0.779151
ENSSSCG00000003713	HRH4	475.093	-0.0268118	0.132819	-0.201868	0.84002	0.925262	436.117	0.0693291	0.299292	0.231643	0.816815	0.99681	442.862	-0.111033	0.321874	-0.344958	0.730126	0.983197	439.227	-0.0150749	0.204437	-0.0737386	0.941218	0.991956
ENSSSCG00000003716	SS18	1932.14	0.0503867	0.0798179	0.631271	0.527864	0.746578	1964.4	-0.0266481	0.168924	-0.157751	0.874653	0.998795	2152.77	0.217946	0.17831	1.22229	0.2216	0.864982	2053.52	0.0907429	0.115017	0.788951	0.430141	0.80036
ENSSSCG00000003718	TAF4B	1513.64	0.0318613	0.0766887	0.415462	0.677803	0.838579	1326.63	0.0433716	0.17437	0.248733	0.803568	0.995655	1557.95	-0.00117176	0.188597	-0.00621306	0.995043	0.999429	1436.36	0.0301822	0.121514	0.248384	0.803837	0.957029
ENSSSCG00000003719		202.599	0.164051	0.148191	1.10703	0.268283	0.533857	186.265	0.163218	0.290216	0.562403	0.573842	0.993215	191.883	0.133303	0.265192	0.502666	0.615199	0.96981	188.891	0.131244	0.22203	0.591111	0.554446	0.864146
ENSSSCG00000003722	CDH2	69.0441	-0.169604	0.213592	-0.794053	0.427164	0.672579	65.1264	-0.194546	0.463206	-0.419999	0.674486	0.995655	63.1679	-0.0308103	0.384907	-0.0800459	0.936201	0.998093	64.1846	-0.121621	0.256656	-0.473867	0.635595	0.90177
ENSSSCG00000003728	TRAPPC8	3486.33	0.129354	0.0561578	2.3034	0.0212565	0.121686	3026.8	0.0747667	0.153777	0.486202	0.626824	0.995552	3580.59	0.20696	0.170273	1.21546	0.224192	0.868072	3289.61	0.144082	0.0820332	1.75639	0.0790218	0.438712
ENSSSCG00000003729	RNF125	1233.66	0.264205	0.150831	1.75166	0.0798316	0.269396	972.784	0.2001	0.20801	0.96197	0.336065	0.967942	1200.08	0.153538	0.335275	0.457948	0.64699	0.976787	1080.81	0.189534	0.18817	1.00725	0.313814	0.723188
ENSSSCG00000003730	RNF138	802.139	0.0392103	0.0900063	0.435639	0.663099	0.830005	638.036	-0.127446	0.200389	-0.635995	0.52478	0.993041	773.463	0.00659326	0.196738	0.033513	0.973266	0.998768	702.288	-0.055365	0.113612	-0.487317	0.626034	0.897464
ENSSSCG00000003731	GAREM1	901.359	-0.104522	0.219307	-0.476599	0.633648	0.8123	873.335	-0.202539	0.228818	-0.885156	0.376073	0.974844	652.237	-0.135894	0.452651	-0.300219	0.76401	0.98534	768.024	-0.192169	0.282639	-0.679911	0.496561	0.836065
ENSSSCG00000003733	KLHL14	27.5885	0.239764	0.375785	0.638035	0.523451	0.743264	23.405	0.668163	0.560619	1.19183	0.233328	0.929272	27.0332	-0.160341	0.609248	-0.263179	0.792413	0.988618	25.1313	0.253221	0.352655	0.718041	0.472732	0.823538
ENSSSCG00000003738	MAPRE2	7326.01	0.126085	0.225724	0.558579	0.576449	0.778657	4471.08	-0.117548	0.174329	-0.674285	0.50013	0.989825	6545.91	-0.374519	0.293025	-1.27811	0.201209	0.844528	5457.62	-0.260008	0.175744	-1.47947	0.139014	0.543357
ENSSSCG00000003741		123.294	-0.543278	0.207947	-2.61258	0.00898614	0.0683199	110.531	-0.240987	0.405262	-0.594644	0.552081	0.993215	117.106	-1.09275	0.523742	-2.08644	0.0369392	0.556814	113.59	-0.640018	0.334043	-1.91597	0.0553684	0.374964
ENSSSCG00000003743	GALNT1	2955.06	-0.00790381	0.0778467	-0.10153	0.919129	0.962575	2697.18	-0.153166	0.187108	-0.818598	0.413016	0.983944	2910.43	0.0649677	0.174447	0.372422	0.709579	0.981374	2798.03	-0.0446939	0.101054	-0.442277	0.658289	0.90634
ENSSSCG00000003746		18.0753	-0.385965	0.339614	-1.13648	0.255756	0.521698	18.3896	-0.308184	0.604381	-0.509917	0.61011	0.994088	16.0112	-0.485753	0.701484	-0.692465	0.488645	0.953818	17.2528	-0.365746	0.342806	-1.06692	0.286009	0.699888
ENSSSCG00000003747	KIAA1328	762.236	0.0605356	0.0998967	0.605982	0.544527	0.75783	901.007	0.0935676	0.168658	0.554777	0.579047	0.993215	1046.64	0.14058	0.264173	0.532152	0.594621	0.966821	970.128	0.117397	0.131267	0.894338	0.371141	0.762945
ENSSSCG00000003749	PIK3C3	1807	-0.157179	0.0964737	-1.62925	0.103261	0.313146	1512.57	-0.184143	0.218524	-0.842669	0.399414	0.983732	1790.87	-0.0708923	0.198182	-0.357713	0.720558	0.983197	1644.66	-0.127554	0.131482	-0.97013	0.331982	0.736359
ENSSSCG00000003753		158.27	0.278549	0.543458	0.51255	0.608266	0.798784	155.654	-0.509147	0.428375	-1.18855	0.234616	0.930326	210.636	-0.411104	0.69543	-0.591151	0.55442	0.96456	181.811	-0.445778	0.445449	-1.00074	0.316953	0.725138
ENSSSCG00000003755	MCOLN2	5241.98	0.192169	0.134273	1.43118	0.152379	0.393538	5678.93	0.165391	0.643261	0.257113	0.797092	0.995655	5268.36	0.597319	0.439921	1.35779	0.174531	0.821457	5482.23	0.360047	0.342262	1.05196	0.292817	0.70448
ENSSSCG00000003756	LPAR3	159.425	-0.397451	0.244465	-1.6258	0.103992	0.31436	135.239	-0.111606	0.966576	-0.115465	0.908077	0.998795	244.354	-0.976821	0.495303	-1.97217	0.0485904	0.610279	187.073	-0.584415	0.657808	-0.888427	0.374311	0.765142
ENSSSCG00000003757	SSX2IP	1576.44	-0.0387033	0.365288	-0.105953	0.91562	0.961221	1146.32	-0.290475	0.203301	-1.42879	0.153064	0.854239	1740.32	-0.49954	0.259815	-1.92268	0.0545208	0.634551	1428.75	-0.404791	0.209314	-1.93389	0.0531265	0.368685
ENSSSCG00000003760	TTLL7	11.7034	-0.652269	0.443613	-1.47036	0.141465	0.377261	14.3033	-0.588893	0.93219	-0.631731	0.527563	0.993041	10.785	0.0796431	0.904881	0.088015	0.929865	0.997528	12.6271	-0.27223	0.579551	-0.469725	0.638551	0.901994
ENSSSCG00000003761	ADGRL2	750.779	1.06599	0.259213	4.11239	3.91587e-05	0.00140171	322.267	0.246118	0.23846	1.03212	0.302017	0.960992	1061.9	1.7973	0.458036	3.92393	8.71153e-05	0.024483	674.188	1.3333	0.517104	2.5784	0.00992597	0.154664
ENSSSCG00000003763	IFI44	1143.59	1.09541	0.191687	5.7146	1.09961e-08	2.35275e-06	1191.55	1.61666	0.312687	5.17022	2.33821e-07	0.00012617	1113.73	1.21385	0.477641	2.54134	0.011043	0.359831	1154.23	1.40176	0.318101	4.40665	1.04983e-05	0.00181392
ENSSSCG00000003766	DNAJB4	1481.8	0.362637	0.212824	1.70392	0.0883952	0.286044	1607.37	0.877424	0.697536	1.25789	0.208431	0.912981	1503.95	0.891957	0.487338	1.83026	0.0672104	0.674353	1557.74	0.88251	0.354244	2.49125	0.0127294	0.177981
ENSSSCG00000003770	MIGA1	236.372	-0.0992118	0.11531	-0.860395	0.389572	0.643699	193.724	-0.0820343	0.26647	-0.307856	0.758192	0.995655	247.237	-0.279532	0.245182	-1.1401	0.254245	0.886066	219.141	-0.18981	0.163116	-1.16365	0.244566	0.663957
ENSSSCG00000003771	FUBP1	4023.39	-0.297887	0.0890306	-3.34589	0.000820177	0.0132406	3745.13	-0.160306	0.167643	-0.956232	0.338955	0.967942	4243.99	-0.289867	0.245199	-1.18217	0.237139	0.875585	3981.12	-0.227719	0.120746	-1.88593	0.0593039	0.388924
ENSSSCG00000003772		2392.49	-0.0167836	0.0849369	-0.197601	0.843357	0.92658	2174.47	-0.206205	0.170472	-1.20961	0.226427	0.926655	2669.1	0.0594961	0.251643	0.236431	0.813098	0.988618	2409.26	-0.0629443	0.138643	-0.454004	0.649826	0.904735
ENSSSCG00000003775	MSH4	1656.79	-0.0847984	0.0786546	-1.07811	0.280984	0.546456	1724.71	0.0214266	0.172964	0.123879	0.901411	0.998795	1854.4	-0.0370459	0.201388	-0.183953	0.85405	0.99083	1785.95	-0.00723345	0.0993557	-0.0728036	0.941962	0.992191
ENSSSCG00000003776	ACADM	829.668	0.204892	0.0958896	2.13675	0.0326181	0.157414	891.763	0.303915	0.254188	1.19563	0.231842	0.929272	1001.86	0.0278633	0.255677	0.108978	0.91322	0.994773	943.989	0.16268	0.165416	0.983459	0.325382	0.732076
ENSSSCG00000003779	TYW3	71.9573	0.0562726	0.17665	0.318554	0.750065	0.880764	69.6065	0.0864514	0.386611	0.223613	0.823058	0.99681	69.0103	0.31305	0.363482	0.861253	0.389099	0.923864	69.3073	0.192708	0.209844	0.918337	0.358442	0.754017
ENSSSCG00000003780	CRYZ	29.4576	0.457689	0.26187	1.74777	0.0805032	0.270958	27.2336	0.634357	0.500407	1.26768	0.204911	0.908818	26.7738	0.331371	0.616523	0.537484	0.590933	0.966821	27.0121	0.49613	0.304723	1.62814	0.103496	0.493556
ENSSSCG00000003783	FPGT	20.9845	0.341712	0.414785	0.82383	0.410036	0.659318	16.9975	-0.722964	0.851219	-0.849328	0.395699	0.98314	19.5931	-0.293588	0.773892	-0.379366	0.704416	0.981374	18.2328	-0.491748	0.504595	-0.974539	0.329789	0.734639
ENSSSCG00000003784	LRRIQ3	85.5126	0.145469	0.234387	0.620636	0.534839	0.750861	86.6015	0.340038	0.42966	0.791412	0.428704	0.983944	88.5964	-0.227703	0.331738	-0.686396	0.492464	0.95501	87.5296	0.0495971	0.258748	0.191681	0.847992	0.970845
ENSSSCG00000003787	ZRANB2	2510.91	-0.260496	0.107163	-2.43083	0.0150644	0.09749	2234.12	-0.188521	0.198021	-0.952027	0.341084	0.967942	2720.21	-0.309514	0.22379	-1.38305	0.166648	0.814712	2464.55	-0.253051	0.128399	-1.97081	0.0487454	0.353005
ENSSSCG00000003788	PTGER3	41.7696	0.126227	0.311565	0.40514	0.685375	0.843635	27.8015	0.233958	0.582008	0.401985	0.687695	0.995655	30.8489	-0.229597	0.81269	-0.282515	0.777549	0.986962	29.2323	-0.156058	0.498073	-0.313323	0.754036	0.943936
ENSSSCG00000003789	CTH	18.4008	-0.0670835	0.346276	-0.193728	0.846389	0.928182	13.1905	-0.536639	0.970122	-0.553166	0.58015	0.993215	19.5117	0.0171299	0.640517	0.0267438	0.978664	0.998768	16.1916	-0.0473711	0.522952	-0.090584	0.927823	0.989063
ENSSSCG00000003790	ANKRD13C	894.188	-0.171992	0.0607908	-2.82924	0.00466586	0.0446952	810.066	-0.185495	0.161576	-1.14803	0.250954	0.94144	896.49	-0.148444	0.196165	-0.756731	0.449211	0.944851	850.97	-0.165411	0.0787311	-2.10097	0.0356439	0.304318
ENSSSCG00000003791	SRSF11	4583.84	-0.325288	0.0832088	-3.9093	9.25631e-05	0.00263934	4359.35	-0.31003	0.167909	-1.84641	0.064832	0.667148	5335.63	-0.222252	0.22845	-0.972869	0.330619	0.914318	4822.47	-0.266755	0.133474	-1.99856	0.0456562	0.342409
ENSSSCG00000003792		185.428	-0.188849	0.105427	-1.79128	0.0732483	0.255694	168.342	-0.264268	0.250591	-1.05458	0.291619	0.960579	193.719	-0.0375011	0.25025	-0.149854	0.88088	0.99083	180.365	-0.152826	0.138377	-1.10441	0.269414	0.686498
ENSSSCG00000003795	WLS	188.932	0.257581	0.188096	1.36941	0.170871	0.419244	140.322	-0.0926077	0.266524	-0.347465	0.728242	0.995655	240.884	0.462075	0.406549	1.13658	0.255714	0.886356	188.139	0.221362	0.285605	0.775063	0.438303	0.804415
ENSSSCG00000003797	DIRAS3	10.7727	-0.243552	0.419845	-0.580099	0.561848	0.768601	10.3319	-0.967396	0.851891	-1.13559	0.25613	0.944599	11.5781	0.608854	1.07039	0.568813	0.569483	0.96598	10.9235	-0.223022	0.601359	-0.370863	0.71074	0.928596
ENSSSCG00000003798	SERBP1	7207.37	-0.00146089	0.0658296	-0.022192	0.982295	0.990177	7730.36	-0.0696719	0.141825	-0.491252	0.623248	0.99491	7982.61	0.118363	0.182152	0.649801	0.51582	0.958922	7848.27	0.0189496	0.0924568	0.204956	0.837606	0.967993
ENSSSCG00000003799	IL12RB2	1651.59	-1.08294	0.206402	-5.24674	1.54817e-07	2.06954e-05	963.123	-1.29861	0.261743	-4.96138	6.99933e-07	0.00032567	1024.72	-0.598585	0.43867	-1.36455	0.172396	0.81901	991.959	-1.00225	0.331684	-3.0217	0.00251358	0.0687132
ENSSSCG00000003801	IL23R	12.2773	0.271065	0.406841	0.666268	0.50524	0.730248	10.8048	0.415102	0.760565	0.545782	0.585216	0.993215	15.3282	0.889224	0.892578	0.996243	0.319132	0.911283	12.9557	0.580156	0.484019	1.19862	0.230675	0.649944
ENSSSCG00000003805	PDE4B	14144.8	0.030596	0.150324	0.203534	0.838717	0.924569	12947.2	-0.0287638	0.255283	-0.112674	0.910289	0.998795	13209.8	0.321708	0.243794	1.31959	0.186973	0.830331	13069	0.121374	0.194087	0.625358	0.531736	0.851903
ENSSSCG00000003806	LEPROT	192.528	0.434037	0.148798	2.91695	0.00353468	0.0368293	185.572	0.687246	0.3209	2.14162	0.0322239	0.505466	195.108	0.056991	0.281566	0.202408	0.839598	0.99083	190.056	0.363138	0.211061	1.72054	0.0853346	0.455139
ENSSSCG00000003809	JAK1	18505	0.0385709	0.0587752	0.656244	0.511667	0.735797	14171.2	0.00375488	0.155589	0.0241333	0.980746	0.998917	17176	0.047474	0.183417	0.258831	0.795765	0.988618	15597.4	0.0294041	0.0998529	0.294475	0.768395	0.947069
ENSSSCG00000003812	PGM1	271.072	0.0311143	0.0960333	0.323994	0.745942	0.878014	246.737	-0.108081	0.21985	-0.49161	0.622995	0.99491	270.748	0.165157	0.264969	0.623307	0.533083	0.962346	258.087	0.032732	0.130289	0.251226	0.801639	0.956587
ENSSSCG00000003814	EFCAB7	32.3591	-0.346692	0.250349	-1.38483	0.166104	0.412605	25.7804	-0.330685	0.580659	-0.569499	0.569017	0.993215	38.6201	-0.58078	0.519049	-1.11893	0.263169	0.893121	31.878	-0.475549	0.341858	-1.39107	0.164203	0.580386
ENSSSCG00000003815	ALG6	204.292	-0.1628	0.177446	-0.917463	0.3589	0.616864	183.477	0.107348	0.249819	0.429705	0.66741	0.995655	204.369	-0.370118	0.300577	-1.23136	0.218189	0.863149	193.354	-0.12675	0.168157	-0.753761	0.450993	0.81062
ENSSSCG00000003816	ATG4C	1118.54	0.0868258	0.124111	0.699583	0.484188	0.715267	1031.14	0.212272	0.191564	1.1081	0.267818	0.951757	1258.42	0.233691	0.269313	0.86773	0.385542	0.923351	1139.07	0.20554	0.162033	1.26851	0.204616	0.628534
ENSSSCG00000003818	DOCK7	615.092	0.231996	0.0944079	2.45738	0.0139955	0.0927293	535.236	0.303992	0.218531	1.39107	0.164204	0.868172	701.949	0.200652	0.213974	0.937739	0.348379	0.920052	614.452	0.235506	0.177144	1.32946	0.183696	0.603572
ENSSSCG00000003820	USP1	2884.71	-0.179672	0.117914	-1.52375	0.127572	0.35561	2635.6	-0.206849	0.19875	-1.04075	0.297991	0.960992	3134.82	-0.320814	0.309689	-1.03592	0.300238	0.903854	2871.96	-0.278813	0.17382	-1.60403	0.108707	0.500232
ENSSSCG00000003825	CYP2J34	156.307	-0.407748	0.219808	-1.85502	0.0635932	0.235093	157.506	0.0696186	0.253646	0.274472	0.783722	0.995655	141.939	-1.04959	0.442738	-2.37067	0.017756	0.441394	150.04	-0.418865	0.283626	-1.47682	0.139724	0.544569
ENSSSCG00000003826		120.637	-0.0489378	0.198691	-0.246301	0.80545	0.907262	107.254	-0.521038	0.378459	-1.37674	0.168594	0.876907	115.892	0.281603	0.522076	0.539391	0.589617	0.966821	111.361	-0.0986803	0.319983	-0.308392	0.757784	0.945013
ENSSSCG00000003828	FGGY	166.854	0.1388	0.141322	0.982156	0.326023	0.588772	147.255	0.31209	0.291914	1.06912	0.285017	0.958346	156.453	-0.300005	0.389738	-0.769762	0.441441	0.942751	151.611	0.00934095	0.249226	0.0374799	0.970102	0.99484
ENSSSCG00000003830	MYSM1	2287.81	-0.241281	0.0860485	-2.80401	0.00504709	0.0466068	1851.21	-0.231911	0.164412	-1.41054	0.158379	0.857058	2272.77	-0.161182	0.233496	-0.6903	0.490005	0.954444	2051.19	-0.192903	0.133001	-1.45039	0.14695	0.555992
ENSSSCG00000003831	OMA1	137.263	0.113231	0.133179	0.850217	0.395205	0.648336	111.267	0.0485769	0.307948	0.157743	0.874659	0.998795	133.668	0.157489	0.553067	0.284755	0.775832	0.986962	121.887	0.113745	0.307271	0.370178	0.71125	0.928739
ENSSSCG00000003839		100.247	-1.15895	0.404785	-2.86313	0.00419482	0.0417475	72.4895	-1.1142	0.637317	-1.74827	0.0804168	0.710376	130.506	-2.41074	0.791053	-3.0475	0.00230751	0.189807	99.962	-1.90132	0.564129	-3.37037	0.000750676	0.0327
ENSSSCG00000003843	PARS2	146.495	0.183441	0.112236	1.63442	0.10217	0.311055	145.696	0.295512	0.255651	1.15592	0.247714	0.939535	129.583	0.178267	0.322315	0.553082	0.580207	0.966659	137.99	0.223581	0.196042	1.14048	0.254088	0.671704
ENSSSCG00000003844	TTC4	453.088	-0.0250873	0.0848446	-0.295685	0.767471	0.888124	447.989	0.0630207	0.185764	0.339252	0.73442	0.995655	498.907	-0.0608511	0.227315	-0.267694	0.788935	0.988618	472.12	0.00083716	0.100781	0.00830675	0.993372	0.998842
ENSSSCG00000003848	LRP8	159.971	-0.467923	0.151354	-3.09157	0.00199098	0.0246852	135.564	-0.570777	0.274108	-2.08231	0.0373145	0.539879	166.794	-0.530547	0.30115	-1.76174	0.0781131	0.691546	150.365	-0.55097	0.15705	-3.50824	0.000451086	0.0237022
ENSSSCG00000003849	MAGOH	346.843	-0.111584	0.130951	-0.852109	0.394154	0.647289	346.887	-0.239084	0.227384	-1.05146	0.293049	0.960911	443.233	-0.237264	0.254804	-0.931162	0.35177	0.920068	392.584	-0.238341	0.144975	-1.64402	0.100172	0.489255
ENSSSCG00000003850	CZIB	356.902	0.0339607	0.129796	0.261646	0.793595	0.899898	420.579	-0.051779	0.252873	-0.204763	0.837757	0.997873	446.524	-0.0479706	0.290806	-0.164957	0.868978	0.99083	432.788	-0.0438095	0.175652	-0.249411	0.803043	0.956984
ENSSSCG00000003851	CPT2	229.167	0.294806	0.130251	2.26337	0.0236128	0.129076	223.646	0.34979	0.21797	1.60476	0.108546	0.785986	181.884	-0.0518644	0.299459	-0.173194	0.862499	0.99083	203.731	0.174206	0.197293	0.882982	0.377246	0.767882
ENSSSCG00000003857	ZYG11B	2310.48	0.195546	0.228742	0.854876	0.39262	0.646307	1820.09	0.0784852	0.156294	0.502162	0.615553	0.994707	2510.53	-0.322628	0.299891	-1.07582	0.282009	0.899985	2148.32	-0.143584	0.191802	-0.748607	0.454094	0.813036
ENSSSCG00000003859	TUT4	2949.05	-0.278744	0.0901394	-3.09237	0.00198565	0.0246421	2368.28	-0.293736	0.194301	-1.51175	0.130597	0.82473	2607.75	-0.165031	0.259712	-0.635438	0.525143	0.959739	2481.65	-0.229276	0.155194	-1.47735	0.139581	0.544494
ENSSSCG00000003861	ORC1	621.831	-0.159672	0.130662	-1.22202	0.221699	0.484514	585.389	0.0547825	0.215011	0.254789	0.798886	0.995655	615.684	-0.419263	0.318937	-1.31456	0.188656	0.833871	599.524	-0.179774	0.203293	-0.884313	0.376527	0.767528
ENSSSCG00000003862	CC2D1B	1883.7	0.0338516	0.0769007	0.440199	0.659793	0.827366	1834.02	0.092812	0.16462	0.563796	0.572893	0.993215	1959.48	-0.0419239	0.193635	-0.21651	0.82859	0.989698	1893.27	0.0254655	0.0906397	0.280953	0.778747	0.948666
ENSSSCG00000003863	ZFYVE9	318.147	0.123036	0.155592	0.790758	0.429085	0.673843	232.574	-0.00955731	0.241007	-0.0396557	0.968368	0.998818	333.569	0.162722	0.342364	0.475289	0.634581	0.975396	280.561	0.08989	0.208228	0.431691	0.665966	0.910078
ENSSSCG00000003867	TXNDC12	422.295	0.0490831	0.0911431	0.538528	0.590213	0.786902	388.699	0.135665	0.20259	0.669655	0.503078	0.989825	436.524	-0.153522	0.270379	-0.567803	0.570169	0.966036	411.325	-0.00969261	0.135513	-0.0715251	0.94298	0.992442
ENSSSCG00000003870	NRDC	2691.15	-0.0293563	0.108837	-0.269727	0.78737	0.89781	2442.55	-0.201416	0.170025	-1.18463	0.236165	0.931247	2725.82	-0.0623422	0.188884	-0.330055	0.741359	0.983405	2576.82	-0.130553	0.0912622	-1.43052	0.152567	0.563782
ENSSSCG00000003872	EPS15	9539.88	0.0894873	0.125253	0.714451	0.474949	0.709254	6945.65	-0.0912009	0.178377	-0.511281	0.609154	0.994088	8348.69	0.0174293	0.259892	0.0670636	0.946531	0.998416	7612.09	-0.0346488	0.136503	-0.253831	0.799626	0.955398
ENSSSCG00000003876	CDKN2C	4166.78	0.357208	0.123558	2.89101	0.00384005	0.0392735	4424.86	0.267074	0.316416	0.844059	0.398636	0.983707	4582.06	0.798931	0.482609	1.65544	0.097835	0.727536	4498.62	0.525811	0.312155	1.68445	0.0920938	0.472375
ENSSSCG00000003877	FAF1	3665.65	0.134089	0.136839	0.979905	0.327133	0.589778	3431.97	-0.0512786	0.215501	-0.23795	0.811919	0.996517	3600.79	0.507628	0.39074	1.29914	0.193894	0.838473	3511.84	0.221208	0.232992	0.949424	0.342405	0.743689
ENSSSCG00000003885	CMPK1	1122.94	0.0160054	0.117707	0.135976	0.89184	0.949185	958.161	-0.138126	0.201841	-0.68433	0.493767	0.989825	1028.81	-0.117675	0.196512	-0.598819	0.549293	0.96456	991.524	-0.1244	0.116558	-1.06728	0.285845	0.699888
ENSSSCG00000003888	STIL	1562.3	0.0665216	0.0851103	0.781593	0.434454	0.677978	1349.12	0.088386	0.193633	0.456461	0.648059	0.995655	1641.75	0.170961	0.206624	0.827402	0.408009	0.930669	1487.99	0.132335	0.11656	1.13534	0.256232	0.674402
ENSSSCG00000003895	EFCAB14	1755.5	0.0863058	0.138814	0.621738	0.534114	0.750477	1239.25	0.0814071	0.19311	0.421558	0.673347	0.995655	1607.11	-0.218565	0.199351	-1.09638	0.272912	0.899815	1414.04	-0.0775509	0.133077	-0.582751	0.560061	0.866609
ENSSSCG00000003897	MOB3C	530.774	0.120095	0.102306	1.17388	0.240444	0.505619	472.305	0.172949	0.181863	0.950985	0.341612	0.967942	465.472	0.00323949	0.323475	0.0100147	0.99201	0.998817	468.942	0.0914253	0.163957	0.557618	0.577105	0.873942
ENSSSCG00000003898	MKNK1	675.664	0.0761713	0.104906	0.726088	0.467785	0.703844	561.583	0.0121838	0.185549	0.0656636	0.947646	0.998795	565.26	0.00294839	0.256605	0.01149	0.990832	0.998768	563.214	0.00714479	0.125706	0.0568372	0.954675	0.993746
ENSSSCG00000003903		1097.44	0.358954	0.100969	3.55508	0.000377869	0.0076238	927.149	0.217073	0.197743	1.09775	0.272314	0.952738	920.665	0.58745	0.339209	1.73182	0.0833048	0.704075	923.875	0.388089	0.1935	2.00563	0.0448954	0.340117
ENSSSCG00000003904	LRRC41	735.725	0.0954053	0.0915928	1.04162	0.297586	0.562224	646.354	0.304871	0.189619	1.60781	0.107877	0.784084	688.295	0.0181389	0.195413	0.0928235	0.926044	0.997528	666.142	0.164003	0.111338	1.47301	0.140747	0.546111
ENSSSCG00000003905	RAD54L	135.448	-0.287445	0.18665	-1.54002	0.123556	0.348797	101.719	-0.0768147	0.307678	-0.249659	0.802851	0.995655	108.404	-0.293478	0.471452	-0.622499	0.533614	0.962346	104.86	-0.195445	0.239294	-0.816758	0.414067	0.78974
ENSSSCG00000003909		88.6613	-0.239283	0.257296	-0.929992	0.352375	0.611604	66.6716	0.154979	0.406093	0.381635	0.702732	0.995655	85.2533	-0.346357	0.577692	-0.599553	0.548804	0.96456	75.4841	-0.115518	0.326515	-0.353792	0.723495	0.932516
ENSSSCG00000003913	MAST2	3406.99	0.26167	0.163118	1.60418	0.108675	0.322874	3248.59	0.147911	0.195599	0.756193	0.449533	0.988535	2461.16	0.624919	0.440342	1.41917	0.15585	0.809912	2873.22	0.393885	0.346859	1.13558	0.256134	0.674402
ENSSSCG00000003914	PRDX1	1667.6	-0.0297005	0.0845162	-0.351418	0.725275	0.866866	1698.46	-0.0104857	0.192656	-0.0544271	0.956595	0.998818	1767.83	-0.0756199	0.208235	-0.363147	0.716495	0.983197	1730.94	-0.043287	0.116779	-0.370674	0.71088	0.928596
ENSSSCG00000003917	TESK2	2491.57	0.126491	0.142189	0.889598	0.373682	0.630825	2299.67	0.0891389	0.161206	0.552952	0.580297	0.993215	2799.06	-0.108432	0.197459	-0.549139	0.58291	0.966659	2536.83	-0.0246318	0.154171	-0.159769	0.873063	0.976211
ENSSSCG00000003918	TOE1	432.457	-0.0365636	0.0946048	-0.386488	0.699136	0.851141	399.364	0.0478524	0.213875	0.22374	0.82296	0.99681	417.633	-0.0594174	0.208453	-0.28504	0.775614	0.986962	407.947	0.00195329	0.140916	0.0138614	0.988941	0.998039
ENSSSCG00000003919		634.416	-0.203894	0.114226	-1.785	0.0742619	0.25817	616.898	-0.134224	0.223631	-0.600201	0.548372	0.993215	638.067	-0.376066	0.298341	-1.26052	0.207481	0.850485	626.711	-0.250877	0.163705	-1.5325	0.1254	0.524574
ENSSSCG00000003920		23.5291	0.233947	0.312075	0.74965	0.453465	0.691453	19.7943	0.801677	0.662546	1.20999	0.226281	0.926648	25.798	-0.192046	0.695763	-0.276023	0.78253	0.987961	22.6517	0.190393	0.427589	0.445271	0.656124	0.90591
ENSSSCG00000003921	ZSWIM5	147.447	-0.0471331	0.169771	-0.277628	0.781298	0.895023	123.837	-0.22463	0.378036	-0.594202	0.552377	0.993215	170.581	-0.0782075	0.377191	-0.207342	0.835743	0.989763	146.06	-0.163781	0.252191	-0.649435	0.516057	0.844729
ENSSSCG00000003922	UROD	6916.27	-0.235854	0.130103	-1.81282	0.0698589	0.248994	8320.6	-0.549828	0.206011	-2.66893	0.00760934	0.251593	7419.27	0.116328	0.520061	0.223682	0.823005	0.989273	7890.17	-0.248071	0.315687	-0.785812	0.431977	0.801674
ENSSSCG00000003923	HECTD3	870.788	0.108061	0.0767575	1.40782	0.159185	0.403541	756.946	0.232749	0.179045	1.29995	0.193619	0.90134	795.947	0.05135	0.189663	0.270743	0.786588	0.988618	775.306	0.144976	0.090527	1.60147	0.109273	0.500533
ENSSSCG00000003926	BTBD19	73.5286	0.181118	0.251806	0.719275	0.471972	0.707188	56.6053	0.22901	0.398998	0.573963	0.565993	0.993215	62.5725	0.480599	0.463494	1.0369	0.29978	0.903854	59.4304	0.33943	0.248487	1.36599	0.171943	0.591423
ENSSSCG00000003928	PLK3	2787.21	0.339163	0.163693	2.07195	0.0382702	0.173927	2384.81	0.202155	0.27713	0.729459	0.465721	0.98867	2463.19	0.653568	0.200568	3.25859	0.00111966	0.132298	2421.73	0.421758	0.181685	2.32138	0.0202666	0.229523
ENSSSCG00000003930	RPS8	81662.4	0.245301	0.121537	2.01833	0.0435574	0.18899	88512.5	0.13913	0.221881	0.627049	0.530627	0.993041	70908	0.335637	0.312281	1.07479	0.282468	0.899985	80123.2	0.216056	0.240946	0.8967	0.369879	0.761983
ENSSSCG00000003931	KIF2C	403.282	-0.1755	0.185599	-0.945586	0.34436	0.604826	416.911	-0.167946	0.229951	-0.730354	0.465174	0.98867	412.932	-0.613381	0.227659	-2.6943	0.00705366	0.297991	414.878	-0.379101	0.150318	-2.522	0.011669	0.167657
ENSSSCG00000003940	HYI	173.641	0.215061	0.164639	1.30626	0.191463	0.446814	205.597	0.146417	0.29951	0.488856	0.624944	0.99491	212.9	0.130663	0.331563	0.394082	0.693521	0.979182	209.002	0.114145	0.253597	0.450106	0.652634	0.905313
ENSSSCG00000003941	SZT2	1647.48	-0.0491363	0.0992154	-0.495249	0.620424	0.806121	1278.78	0.0477094	0.158213	0.301551	0.762994	0.995655	1235.2	0.09367	0.224134	0.417919	0.676006	0.979182	1257.77	0.0698119	0.11317	0.616876	0.537317	0.854949
ENSSSCG00000003943	MED8	926.524	-0.00578954	0.101423	-0.0570829	0.954479	0.977079	1186.74	0.0781937	0.308717	0.253286	0.800047	0.995655	787.174	0.139866	0.244769	0.57142	0.567715	0.96598	996.315	0.103379	0.268349	0.385242	0.700058	0.923646
ENSSSCG00000003949	CDC20	287.358	-0.58337	0.188516	-3.09454	0.00197117	0.024508	268.173	-0.337626	0.375675	-0.898718	0.368803	0.971756	337.864	-0.968196	0.396501	-2.44185	0.0146122	0.402282	301.131	-0.656966	0.289736	-2.26747	0.0233616	0.249481
ENSSSCG00000003950	TIE1	554.613	0.345065	0.239779	1.43909	0.150124	0.39007	482.72	-0.128566	0.195414	-0.657915	0.510593	0.990567	601.957	-0.0212856	0.420887	-0.0505732	0.959666	0.998416	539.39	-0.0936829	0.239953	-0.390421	0.696225	0.923284
ENSSSCG00000003964	PPIH	595.865	0.00704506	0.143827	0.0489827	0.960933	0.979844	652.965	0.38641	0.209435	1.84501	0.0650356	0.667148	669.98	-0.340313	0.21383	-1.59152	0.111494	0.747077	660.877	0.0310877	0.160989	0.193105	0.846877	0.970276
ENSSSCG00000003965		88.5632	-0.34836	0.20045	-1.73789	0.082231	0.274376	66.9809	0.0116828	0.359804	0.0324699	0.974097	0.998818	77.6738	-0.183459	0.480648	-0.381691	0.702691	0.981188	72.0584	-0.0873279	0.238993	-0.3654	0.714813	0.930076
ENSSSCG00000003966	PPCS	543.287	-0.0996681	0.100712	-0.989633	0.322353	0.586482	416.077	0.093412	0.216873	0.430722	0.66667	0.995655	461.286	-0.182069	0.266147	-0.68409	0.493918	0.95501	437.453	-0.0409661	0.150921	-0.27144	0.786052	0.951076
ENSSSCG00000003971	SCMH1	371.729	-0.133802	0.111779	-1.19703	0.231296	0.495126	282.749	-0.0188766	0.222376	-0.0848862	0.932352	0.998795	351.539	-0.269484	0.273737	-0.984467	0.324886	0.911283	315.429	-0.169568	0.183491	-0.924121	0.355424	0.751818
ENSSSCG00000003973	CTPS1	477.866	-0.0718612	0.102413	-0.701681	0.482878	0.714632	409.298	-0.0948311	0.250751	-0.378189	0.705291	0.995655	414.626	0.0617447	0.215927	0.285952	0.774915	0.986962	411.734	-0.00998313	0.144936	-0.0688797	0.945085	0.992488
ENSSSCG00000003976	NFYC	2248.48	0.0429894	0.101262	0.424534	0.671176	0.835074	1878.38	-0.0500004	0.181856	-0.274945	0.783359	0.995655	2145.84	0.269192	0.192697	1.39697	0.162422	0.811098	2005.22	0.114438	0.115937	0.987069	0.323609	0.730928
ENSSSCG00000003979	ZNF684	117.155	-0.300114	0.138871	-2.1611	0.0306878	0.151124	110.731	-0.0491937	0.2992	-0.164418	0.869402	0.998795	136.938	-0.396351	0.280832	-1.41135	0.158142	0.810357	123.158	-0.233991	0.162239	-1.44226	0.149229	0.558344
ENSSSCG00000003980	EXO5	504.798	-0.178835	0.0963444	-1.85621	0.0634239	0.234773	431.102	-0.246157	0.229669	-1.07179	0.283815	0.956837	524.822	-0.178534	0.285785	-0.624715	0.532158	0.962346	475.53	-0.209749	0.159031	-1.31892	0.187195	0.607765
ENSSSCG00000003981	ZFP69B	485.479	-0.0790497	0.109137	-0.724318	0.468871	0.705	454.909	-0.087686	0.198819	-0.441035	0.659188	0.995655	545.476	-0.192083	0.229191	-0.83809	0.40198	0.928614	497.857	-0.137256	0.123128	-1.11474	0.264961	0.681725
ENSSSCG00000003983	SMAP2	5169.26	0.111025	0.138167	0.803554	0.421655	0.667946	4649.37	-0.072329	0.221615	-0.326372	0.744143	0.995655	4376.74	0.497046	0.32746	1.51788	0.129043	0.774333	4518.75	0.19354	0.21534	0.898764	0.368778	0.761573
ENSSSCG00000003984		183.011	-0.185145	0.14546	-1.27282	0.203081	0.461078	197.585	-0.0562373	0.27626	-0.203567	0.838692	0.997873	181.943	-0.194961	0.362045	-0.5385	0.590232	0.966821	190.065	-0.111486	0.203257	-0.5485	0.583349	0.876352
ENSSSCG00000003986		140.612	-0.333668	0.18413	-1.81213	0.0699659	0.249242	134.992	0.0164462	0.307995	0.0533978	0.957415	0.998818	176.494	-0.742029	0.411515	-1.80316	0.0713626	0.682026	154.652	-0.382038	0.258538	-1.47769	0.139492	0.544494
ENSSSCG00000003987		24.0364	-0.493436	0.357262	-1.38116	0.16723	0.413296	16.5984	-0.271252	0.790156	-0.343289	0.731381	0.995655	30.2341	-0.406457	0.61122	-0.664993	0.506055	0.956278	23.0815	-0.351417	0.454463	-0.773258	0.43937	0.804482
ENSSSCG00000003989		99.0951	-0.32371	0.2736	-1.18315	0.236749	0.501446	75.97	0.0287769	0.352692	0.0815922	0.934971	0.998795	117.439	-0.743713	0.60704	-1.22515	0.22052	0.864417	95.6399	-0.405339	0.366481	-1.10603	0.268714	0.685362
ENSSSCG00000003990		320.023	-0.241863	0.115935	-2.0862	0.0369607	0.170124	258.144	-0.174876	0.223564	-0.782218	0.434086	0.983944	298.271	-0.569006	0.401439	-1.41742	0.156361	0.809912	277.131	-0.374318	0.20738	-1.80498	0.0710771	0.419399
ENSSSCG00000003995	ZNF606	53.6528	-0.936862	0.333731	-2.80723	0.00499692	0.0464333	41.6934	-0.47572	0.501593	-0.948419	0.342916	0.967942	58.3111	-1.96226	0.786713	-2.49425	0.0126223	0.383292	49.577	-1.22726	0.457197	-2.68431	0.00726789	0.128541
ENSSSCG00000003998	ZNF274	288.922	0.307517	0.117514	2.61685	0.00887445	0.0678024	273.721	0.449908	0.248415	1.81112	0.0701227	0.682016	292.134	0.362462	0.280357	1.29286	0.19606	0.83934	282.416	0.41177	0.157027	2.62229	0.00873416	0.143724
ENSSSCG00000004002	RPS5	25112.5	0.314121	0.117372	2.67629	0.00744417	0.0598952	26461	0.324853	0.193353	1.68011	0.0929364	0.741842	21472.6	0.444831	0.22345	1.99074	0.0465094	0.598105	24083	0.375716	0.204639	1.836	0.0663582	0.408361
ENSSSCG00000004004	ZNF584	119.941	0.0728047	0.178576	0.407696	0.683497	0.842804	112.676	0.239051	0.324899	0.735769	0.461872	0.98867	118.82	-0.0425503	0.335085	-0.126983	0.898954	0.992395	115.557	0.108724	0.190321	0.571267	0.567819	0.870839
ENSSSCG00000004008		159.684	0.213681	0.178102	1.19977	0.230228	0.494062	154.836	0.16374	0.302396	0.541474	0.588181	0.993215	176.497	0.557175	0.358656	1.55351	0.120301	0.76334	165.127	0.369466	0.212871	1.73563	0.0826289	0.445293
ENSSSCG00000004009	TCTE3	7.40906	0.285469	0.398347	0.716635	0.473599	NA	6.33786	0.398227	1.01271	0.393229	0.69415	NA	6.3133	0.0281984	1.07994	0.0261111	0.979169	NA	6.32423	0.221198	0.563226	0.392734	0.694516	NA
ENSSSCG00000004010	ERMARD	1235.37	-0.15345	0.0912552	-1.68154	0.0926572	0.294469	1066.96	-0.04299	0.167126	-0.257232	0.797	0.995655	1117.84	-0.201945	0.268042	-0.753407	0.451205	0.945262	1090.82	-0.112107	0.14815	-0.756709	0.449224	0.809817
ENSSSCG00000004012	THBS2	501.274	-0.195518	0.183414	-1.06599	0.286428	0.551914	368.127	-0.429715	0.469016	-0.916204	0.35956	0.967942	604.343	0.128138	0.358958	0.356972	0.721113	0.983197	480.33	-0.0753709	0.363656	-0.207259	0.835808	0.967607
ENSSSCG00000004018	AFDN	43.9656	0.29298	0.20339	1.44049	0.14973	0.389415	40.8895	0.144281	0.477735	0.30201	0.762644	0.995655	34.6268	0.593773	0.525129	1.13072	0.258174	0.889129	37.9036	0.352325	0.379601	0.928147	0.353331	0.75124
ENSSSCG00000004020	SFT2D1	1023.39	0.148532	0.0910388	1.63152	0.10278	0.312184	888.774	0.195993	0.199531	0.98227	0.325967	0.967458	1076.11	0.0458616	0.25747	0.178124	0.858625	0.99083	977.757	0.118791	0.145426	0.816854	0.414012	0.78974
ENSSSCG00000004022	RPS6KA2	1401.71	0.255069	0.265657	0.960145	0.336982	0.59863	1205.44	-0.119749	0.713836	-0.167754	0.866777	0.998795	1292.73	-0.239678	0.346932	-0.690849	0.48966	0.954279	1246.9	-0.179164	0.302457	-0.59236	0.55361	0.863352
ENSSSCG00000004023	FGFR1OP	139.677	-0.40469	0.139056	-2.91026	0.00361123	0.0373637	108.921	-0.527253	0.313021	-1.6844	0.0921038	0.736738	125.897	-0.346565	0.344582	-1.00576	0.314533	0.911283	116.965	-0.426611	0.20409	-2.09031	0.03659	0.308063
ENSSSCG00000004024		978.952	0.406793	0.118274	3.43941	0.000582977	0.0103921	824.671	0.424194	0.163616	2.59261	0.00952502	0.285539	947.158	0.532024	0.331488	1.60496	0.108503	0.741118	882.771	0.481986	0.162133	2.97278	0.00295117	0.0759427
ENSSSCG00000004029	QKI	4748.69	0.162884	0.134417	1.21178	0.225595	0.489426	3956.39	-0.0470553	0.146039	-0.322211	0.747293	0.995655	4734.61	0.0638088	0.193467	0.329818	0.741537	0.983405	4325.64	0.0108534	0.0893954	0.121409	0.903367	0.983586
ENSSSCG00000004032	PRKN	38.6335	-0.0779439	0.204219	-0.381668	0.702708	0.853219	29.5757	-0.00695611	0.583461	-0.0119221	0.990488	0.999052	56.1676	-0.430938	0.685957	-0.628229	0.529854	0.961362	42.2259	-0.290206	0.48152	-0.602686	0.546718	0.860359
ENSSSCG00000004033	AGPAT4	358.668	-0.218695	0.108587	-2.01401	0.0440081	0.190015	277.702	-0.33957	0.227022	-1.49576	0.134717	0.830969	346.78	-0.146521	0.258619	-0.566551	0.571019	0.966395	310.475	-0.232817	0.142758	-1.63085	0.102922	0.493279
ENSSSCG00000004037	MAP3K4	1001.57	-0.170225	0.11326	-1.50297	0.132848	0.362946	662.377	-0.202646	0.250335	-0.809497	0.418229	0.983944	819.276	-0.0735889	0.272533	-0.270018	0.787147	0.988618	736.848	-0.116628	0.19207	-0.607215	0.543708	0.85803
ENSSSCG00000004041	SLC22A1	55.5786	0.0576672	0.360431	0.159995	0.872885	0.941403	35.6648	-0.2264	0.490069	-0.461977	0.644098	0.995655	59.0977	-0.390402	0.55159	-0.707776	0.479085	0.951783	46.8118	-0.316043	0.342788	-0.921978	0.35654	0.752682
ENSSSCG00000004044	IGF2R	4734.43	0.0476	0.153717	0.30966	0.756819	0.88363	3517.78	-0.0852015	0.162699	-0.523674	0.600505	0.994088	3762.69	0.536779	0.233366	2.30016	0.0214392	0.465453	3633.51	0.225424	0.166843	1.35112	0.176658	0.597742
ENSSSCG00000004047	MRPL18	129.521	-0.0631996	0.132475	-0.477069	0.633313	0.812291	100.549	0.0471531	0.50697	0.0930096	0.925896	0.998795	96.5211	-0.269007	0.382994	-0.70238	0.482442	0.952351	98.5987	-0.103392	0.30756	-0.336169	0.736743	0.937129
ENSSSCG00000004048	TCP1	2558.78	-0.111026	0.073623	-1.50803	0.131546	0.361093	2244.51	-0.0303273	0.154225	-0.196643	0.844107	0.997873	2335.43	-0.107932	0.217467	-0.496318	0.61967	0.971782	2287.12	-0.067048	0.0972017	-0.689782	0.490331	0.833633
ENSSSCG00000004049	ACAT2	429.399	-0.488047	0.135733	-3.59565	0.000323585	0.00674312	373.792	-0.546154	0.208389	-2.62083	0.00877149	0.273906	436.637	-0.296279	0.364027	-0.813892	0.415707	0.932385	403.601	-0.423326	0.191137	-2.21477	0.0267756	0.265921
ENSSSCG00000004050		3158.46	0.158141	0.0882555	1.79185	0.0731562	0.255536	2645.79	0.0739213	0.161241	0.458451	0.646628	0.995655	3401.69	0.208289	0.209533	0.994065	0.320191	0.911283	3004.69	0.149638	0.129803	1.15281	0.248989	0.666857
ENSSSCG00000004053	TAGAP	7123.23	0.832639	0.170594	4.88083	1.05642e-06	8.54366e-05	7260.76	0.991063	0.29463	3.36376	0.000768883	0.0551714	5990.55	0.878504	0.31144	2.82078	0.00479072	0.261755	6656.54	0.943766	0.233899	4.03493	5.4618e-05	0.00553448
ENSSSCG00000004054		4629.9	0.253151	0.109502	2.31183	0.0207873	0.119828	6424.75	0.15608	0.209859	0.743738	0.457035	0.98867	5492.45	0.348978	0.197584	1.76623	0.0773578	0.691274	5980.2	0.242271	0.17596	1.37685	0.168557	0.586686
ENSSSCG00000004055	RSPH3	14.6728	0.0325481	0.398079	0.081763	0.934835	0.968661	14.178	0.392155	0.79115	0.495677	0.620122	0.99491	12.8748	0.00935253	0.920813	0.0101568	0.991896	0.998817	13.5493	0.20875	0.505977	0.412569	0.679922	0.915799
ENSSSCG00000004057	SYTL3	3855.94	-0.111066	0.132835	-0.836126	0.403084	0.65441	3087.16	-0.0658608	0.222981	-0.295365	0.767715	0.995655	3946.71	0.177124	0.304658	0.581386	0.56098	0.96456	3495.43	0.0610003	0.190126	0.320842	0.74833	0.941155
ENSSSCG00000004058	EZR	11244	0.0614002	0.086938	0.706253	0.480031	0.712449	11573.5	-0.0646983	0.173304	-0.373323	0.708908	0.995655	11508.6	0.167828	0.190527	0.880863	0.378392	0.921341	11539.9	0.0442954	0.114304	0.387524	0.698368	0.923646
ENSSSCG00000004063	TMEM242	158.212	0.0759697	0.164484	0.461866	0.644177	0.818521	123.65	-0.267343	0.356064	-0.750828	0.452756	0.98867	145.079	0.384472	0.274116	1.40259	0.160739	0.811098	133.81	0.0841726	0.204074	0.412461	0.680002	0.915799
ENSSSCG00000004064	ARID1B	3904.78	-0.0264576	0.0860378	-0.307511	0.758455	0.884195	2701.2	-0.0284395	0.193354	-0.147085	0.883065	0.998795	3056.85	0.0645088	0.198314	0.325287	0.744964	0.983716	2869.78	0.022526	0.112082	0.200977	0.840716	0.96905
ENSSSCG00000004065	TIAM2	404.125	0.0914046	0.128385	0.711955	0.476493	0.710524	429.035	0.0660145	0.194731	0.339003	0.734607	0.995655	377.995	0.450242	0.23137	1.94598	0.0516572	0.620447	404.665	0.237514	0.161518	1.47051	0.141424	0.547159
ENSSSCG00000004070	SCAF8	2947.74	-0.0956325	0.0773327	-1.23664	0.216222	0.47785	2463.93	-0.0894891	0.158896	-0.563192	0.573304	0.993215	2930.8	-0.0555802	0.215914	-0.257419	0.796855	0.988618	2685.38	-0.0701176	0.104116	-0.673453	0.500659	0.838385
ENSSSCG00000004071		570.401	0.391231	0.435664	0.898011	0.36918	0.626242	451.871	0.146372	0.185055	0.790966	0.428964	0.983944	621.45	-0.351156	0.308001	-1.14011	0.25424	0.886066	532.507	-0.151317	0.301733	-0.501492	0.616025	0.892723
ENSSSCG00000004076	MTRF1L	270.307	-0.356489	0.116845	-3.05095	0.00228117	0.0271943	254.396	-0.30171	0.233104	-1.29431	0.195557	0.902508	290.442	-0.28602	0.289354	-0.988479	0.322918	0.911283	271.447	-0.294934	0.145286	-2.03003	0.0423538	0.331589
ENSSSCG00000004077	FBXO5	236.398	-0.364543	0.108803	-3.35049	0.000806687	0.0130862	212.264	-0.337392	0.343928	-0.980998	0.326594	0.967689	266.255	-0.605977	0.403156	-1.50308	0.132818	0.777138	237.844	-0.478463	0.279852	-1.7097	0.0873205	0.459515
ENSSSCG00000004081		2911.36	-0.349445	0.128619	-2.7169	0.00658961	0.0555175	1917.04	-0.369363	0.184728	-1.99949	0.0455549	0.58428	2930.06	-0.121262	0.281407	-0.430913	0.666531	0.978874	2398.67	-0.225146	0.205722	-1.09442	0.273771	0.689089
ENSSSCG00000004082		4931.69	-0.157158	0.115945	-1.35546	0.175271	0.425488	3122.35	-0.102729	0.219851	-0.467265	0.64031	0.995655	4524.93	-0.0320492	0.280641	-0.1142	0.909079	0.994191	3789.09	-0.0616078	0.193721	-0.318023	0.750467	0.941877
ENSSSCG00000004087	CCDC170	31.0984	-0.223416	0.276969	-0.806646	0.41987	0.666626	25.0422	-0.0126018	0.570878	-0.0220743	0.982389	0.998917	33.9799	-1.06511	0.626076	-1.70124	0.0888977	0.713228	29.2928	-0.547706	0.381143	-1.43701	0.150716	0.560639
ENSSSCG00000004088	ARMT1	152.213	-0.231437	0.147964	-1.56414	0.117784	0.3394	120.896	0.0488971	0.312942	0.156249	0.875836	0.998795	134.692	-0.370415	0.384708	-0.962846	0.335625	0.914536	127.42	-0.169189	0.213238	-0.793427	0.427529	0.799037
ENSSSCG00000004089	RMND1	228.961	0.161237	0.109793	1.46856	0.141953	0.377748	246.108	0.342054	0.322944	1.05918	0.28952	0.960579	267.523	0.179951	0.329969	0.545357	0.585508	0.966821	256.258	0.261183	0.219545	1.18966	0.23418	0.653967
ENSSSCG00000004090	ZBTB2	503.965	-0.216887	0.0965448	-2.24649	0.0246729	0.132074	401.635	-0.221927	0.238278	-0.93138	0.351657	0.967942	399.589	-0.242689	0.346914	-0.699565	0.484199	0.952351	400.522	-0.231277	0.186832	-1.23788	0.21576	0.639271
ENSSSCG00000004092	MTHFD1L	23.8018	-0.359748	0.408356	-0.880966	0.378336	0.635112	22.3132	-0.0330578	0.68423	-0.0483138	0.961466	0.998818	24.3311	-1.08754	0.799345	-1.36054	0.173659	0.821192	23.254	-0.525729	0.487009	-1.07951	0.280362	0.695333
ENSSSCG00000004101	LRP11	182.615	0.163722	0.202469	0.808625	0.418731	0.66577	170.176	0.177476	0.348362	0.50946	0.61043	0.994088	172.587	0.17632	0.449403	0.392343	0.694805	0.979182	171.263	0.181975	0.264105	0.689025	0.490807	0.833633
ENSSSCG00000004103	PCMT1	3237.12	0.221598	0.108835	2.03608	0.0417424	0.183749	3351.39	0.105648	0.30798	0.343036	0.731572	0.995655	3330.05	0.558918	0.338139	1.65292	0.0983462	0.727536	3340.53	0.318216	0.237536	1.33965	0.180359	0.600173
ENSSSCG00000004104	KATNA1	2355.49	0.0497893	0.119526	0.416558	0.677002	0.837969	2308.19	-0.0707634	0.220721	-0.320601	0.748513	0.995655	2620.75	0.444623	0.25772	1.72522	0.0844886	0.7103	2456.39	0.184378	0.17515	1.05269	0.292483	0.70448
ENSSSCG00000004105	NUP43	317.323	-0.166883	0.0933587	-1.78755	0.0738488	0.257225	267.349	0.0149418	0.246446	0.0606292	0.951655	0.998795	313.281	-0.29359	0.232406	-1.26326	0.206495	0.85005	289.11	-0.143831	0.136608	-1.05287	0.292401	0.70448
ENSSSCG00000004106	LATS1	2086.29	-0.0958073	0.0687486	-1.39359	0.163441	0.408941	1594.68	-0.0571845	0.162941	-0.350951	0.725625	0.995655	1863.5	-0.0925983	0.225472	-0.410686	0.681303	0.979182	1722.2	-0.074132	0.115915	-0.639536	0.522475	0.847747
ENSSSCG00000004109	ZC3H12D	832.545	0.361838	0.123646	2.9264	0.00342906	0.0361245	832.405	0.417267	0.178707	2.33492	0.0195474	0.405684	772.228	0.570876	0.296881	1.92292	0.0544907	0.634551	803.637	0.48015	0.167982	2.85835	0.00425857	0.0940864
ENSSSCG00000004110	TAB2	4649.97	0.0743303	0.087077	0.853616	0.393318	0.646914	3435.2	0.125548	0.160636	0.781565	0.43447	0.983944	4032.27	0.00033618	0.255815	0.00131415	0.998951	0.999429	3718.54	0.0618559	0.128468	0.48149	0.630169	0.89866
ENSSSCG00000004113	STXBP5	1664.95	-0.104562	0.090422	-1.15638	0.247527	0.513326	1292.32	-0.0941711	0.16002	-0.588495	0.5562	0.993215	1727.53	-0.234738	0.233229	-1.00647	0.314191	0.911283	1499.02	-0.166492	0.144986	-1.14833	0.250831	0.669288
ENSSSCG00000004114	RAB32	305.131	0.131396	0.137696	0.954251	0.339957	0.601317	259.628	0.0767303	0.273074	0.280987	0.77872	0.995655	317.944	-0.0932656	0.225578	-0.413452	0.679275	0.979182	287.303	-0.0176869	0.202406	-0.087383	0.930367	0.989738
ENSSSCG00000004120	SHPRH	715.775	0.0954727	0.133532	0.714979	0.474622	0.70915	653.827	0.214083	0.217005	0.986539	0.323869	0.967458	752.698	-0.210851	0.248074	-0.849952	0.395352	0.927011	700.735	9.10549e-05	0.150149	0.000606432	0.999516	0.999918
ENSSSCG00000004121	FBXO30	5677.06	-0.19724	0.131788	-1.49664	0.134486	0.365399	5084.22	-0.397137	0.163099	-2.43494	0.0148942	0.355661	6023.63	0.296742	0.260068	1.14102	0.253862	0.885597	5530	-0.0422329	0.197038	-0.214339	0.830283	0.966112
ENSSSCG00000004123		14146.2	-0.135668	0.0989549	-1.37101	0.170371	0.41834	11288.9	-0.15724	0.207703	-0.757044	0.449024	0.988535	13744.3	-0.0841132	0.242809	-0.346417	0.729029	0.983197	12454.7	-0.117728	0.14459	-0.814215	0.415522	0.790289
ENSSSCG00000004125	STX11	2843.95	0.957393	0.186766	5.12617	2.95693e-07	3.42387e-05	2786.49	0.753401	0.201314	3.74242	0.000182253	0.019359	2470.8	0.677004	0.348139	1.94464	0.0518185	0.621361	2635.87	0.68092	0.236953	2.87365	0.00405756	0.0911395
ENSSSCG00000004127	PLAGL1	731.412	-0.494337	0.141438	-3.49508	0.000473924	0.00896417	485.301	-0.759219	0.298648	-2.54219	0.0110161	0.306458	561.452	-0.195872	0.252521	-0.775668	0.437945	0.942472	521.416	-0.444823	0.219447	-2.02701	0.0426611	0.332127
ENSSSCG00000004132	PHACTR2	1389.72	0.0298766	0.124604	0.239772	0.810507	0.910316	1197.57	-0.117289	0.188636	-0.621775	0.53409	0.993215	1247.22	-0.0970949	0.228689	-0.424571	0.671149	0.97917	1221	-0.106033	0.116547	-0.909786	0.362935	0.757515
ENSSSCG00000004133	FUCA2	532.734	0.44787	0.184355	2.42939	0.0151244	0.0976706	504.629	0.16739	0.193851	0.8635	0.387863	0.979551	580.051	0.192316	0.288802	0.66591	0.505469	0.956278	540.449	0.180512	0.148462	1.21587	0.224033	0.644949
ENSSSCG00000004134	PEX3	244.912	-0.0911517	0.148451	-0.614017	0.539204	0.75381	225.369	0.110408	0.296262	0.372669	0.709395	0.995655	258.708	-0.343946	0.2728	-1.2608	0.207381	0.850485	241.124	-0.105855	0.221291	-0.47835	0.632401	0.900029
ENSSSCG00000004136	AIG1	496.509	0.358792	0.402479	0.891456	0.372684	0.629484	425.228	-0.06028	0.251242	-0.239928	0.810386	0.996517	613.598	-0.262181	0.335593	-0.781248	0.434656	0.941325	514.827	-0.18357	0.253904	-0.72299	0.469686	0.821298
ENSSSCG00000004138	HIVEP2	5337.03	0.000218901	0.0947256	0.00231089	0.998156	0.998681	3889.39	-0.0753997	0.179516	-0.420016	0.674473	0.995655	3968.55	0.0445861	0.266489	0.167309	0.867127	0.99083	3926.16	-0.014726	0.142089	-0.103639	0.917456	0.987026
ENSSSCG00000004139	ADGRG6	274.634	0.221477	0.219761	1.00781	0.313548	0.578203	260.193	-0.0173412	0.500742	-0.0346311	0.972374	0.998818	263.535	0.695375	1.21947	0.570227	0.568524	0.96598	261.764	0.248094	0.662624	0.374411	0.708099	0.927254
ENSSSCG00000004140	VTA1	1222.01	-0.0310213	0.0688694	-0.450436	0.652396	0.823435	1105.21	-0.0109134	0.176103	-0.0619717	0.950585	0.998795	1321.98	-0.00885505	0.178588	-0.0495836	0.960454	0.998416	1208.03	-0.00536908	0.113075	-0.0474825	0.962129	0.994671
ENSSSCG00000004142	CITED2	1241.83	0.0445305	0.0874763	0.509058	0.610711	0.800259	1143.61	0.00564227	0.161374	0.0349639	0.972109	0.998818	1305.56	0.216754	0.262778	0.824854	0.409454	0.930669	1220.38	0.113226	0.12732	0.889304	0.37384	0.765018
ENSSSCG00000004143	TXLNB	12.9032	-0.972524	0.439525	-2.21267	0.0269202	0.138996	12.6081	0.287597	0.791038	0.363569	0.71618	0.995655	18.5675	-1.40938	0.734814	-1.918	0.0551105	0.635434	15.4329	-0.720492	0.521687	-1.38108	0.167254	0.584135
ENSSSCG00000004144	HECA	7421.83	-0.0197963	0.0848346	-0.233352	0.815488	0.912803	6410.1	-0.0902427	0.178798	-0.504718	0.613757	0.994186	6545.71	0.118787	0.168323	0.705711	0.480368	0.952086	6473.27	0.0110034	0.107888	0.101989	0.918765	0.987259
ENSSSCG00000004145	ABRACL	663.021	0.179007	0.15859	1.12874	0.259006	0.524224	704.037	0.00649074	0.169145	0.0383738	0.96939	0.998818	782.013	-0.179769	0.208328	-0.862916	0.388184	0.923864	740.98	-0.0918855	0.140445	-0.654247	0.512953	0.844478
ENSSSCG00000004146	REPS1	8234.98	0.130352	0.129466	1.00685	0.314009	0.578887	7598.3	0.10847	0.247843	0.437657	0.661635	0.995655	7831.4	0.528934	0.353638	1.49569	0.134734	0.781276	7707.95	0.309324	0.216918	1.426	0.15387	0.565517
ENSSSCG00000004148	CCDC28A	7094.2	-0.27447	0.139838	-1.96276	0.0496735	0.204526	7163	-0.4803	0.28263	-1.69939	0.0892449	0.735128	8081.45	0.255017	0.398197	0.64043	0.521893	0.9597	7598.67	-0.0968562	0.266611	-0.363286	0.716391	0.930848
ENSSSCG00000004149	NHSL1	20.611	-0.0990213	0.332614	-0.297706	0.765927	0.887601	16.3616	-0.0924433	0.781234	-0.11833	0.905806	0.998795	21.4503	0.500589	0.573351	0.873093	0.382612	0.9223	18.7813	0.198593	0.405439	0.489821	0.62426	0.897193
ENSSSCG00000004154	TNFAIP3	21514.4	0.0327522	0.160174	0.20448	0.837979	0.923973	17364.3	0.0690919	0.194129	0.355907	0.72191	0.995655	18515.3	0.265058	0.224749	1.17935	0.238258	0.875654	17907.8	0.166656	0.125709	1.32573	0.18493	0.604928
ENSSSCG00000004156	IFNGR1	2509.83	-0.265383	0.214989	-1.2344	0.217053	0.478445	1635.67	-0.54296	0.324286	-1.67432	0.0940669	0.745572	2704.69	0.112283	0.387028	0.290115	0.771728	0.986962	2143.55	-0.189368	0.339905	-0.557121	0.577445	0.874151
ENSSSCG00000004159	SLC35D3	6.84365	0.433488	0.531098	0.816211	0.414379	NA	5.36132	0.86811	1.12585	0.771071	0.440665	NA	8.18338	-0.773098	1.19992	-0.644293	0.519386	0.959489	6.70645	-0.077006	0.728821	-0.105658	0.915853	NA
ENSSSCG00000004160	PEX7	158.223	0.252125	0.16433	1.53426	0.124966	0.351139	144.423	0.0753747	0.273789	0.275303	0.783084	0.995655	159.137	0.14505	0.347825	0.417021	0.676663	0.979182	151.399	0.109464	0.188756	0.579921	0.561968	0.867542
ENSSSCG00000004163	BCLAF1	14351.6	-0.212717	0.0704371	-3.01996	0.00252805	0.0291965	13007.8	-0.266901	0.18008	-1.48212	0.138307	0.83773	15086.7	-0.171752	0.195044	-0.880582	0.378544	0.921341	13993.2	-0.225008	0.120873	-1.86153	0.06267	0.398429
ENSSSCG00000004164	MTFR2	192.974	-0.174088	0.135032	-1.28924	0.197316	0.453636	209.295	-0.0533723	0.269563	-0.197996	0.843048	0.997873	198.165	-0.373661	0.312761	-1.19471	0.232198	0.873496	203.908	-0.198591	0.187168	-1.06103	0.288677	0.701792
ENSSSCG00000004165	PDE7B	109.158	0.282532	0.167788	1.68387	0.0922072	0.293599	98.3572	0.669107	0.335852	1.99227	0.0463418	0.585188	118.989	0.188721	0.308138	0.612458	0.540235	0.962808	108.161	0.426173	0.227964	1.86947	0.0615569	0.39483
ENSSSCG00000004166	AHI1	1338.47	-0.111528	0.119694	-0.931779	0.351451	0.610612	1294.55	-0.388816	0.226151	-1.71927	0.0855646	0.723212	1323.28	0.00255302	0.202668	0.0125971	0.989949	0.998768	1307.94	-0.202661	0.174995	-1.1581	0.246824	0.664783
ENSSSCG00000004167	MYB	1015.06	-1.31779	0.39545	-3.33238	0.000861077	0.0137021	652.2	-1.2005	0.402532	-2.98238	0.00286019	0.134439	1423.5	-2.33665	1.0972	-2.12965	0.0332008	0.54007	1017.73	-1.88794	0.606124	-3.11478	0.00184083	0.0571558
ENSSSCG00000004169	HBS1L	29653.2	-0.170255	0.143471	-1.18669	0.235351	0.49999	30557.4	-0.422789	0.196706	-2.14935	0.0316069	0.49927	34806.3	0.37062	0.288434	1.28494	0.198814	0.842866	32573.9	-0.0231114	0.192781	-0.119885	0.904574	0.983666
ENSSSCG00000004170		361.638	-0.241988	0.174854	-1.38394	0.166377	0.41295	320.449	-0.205845	0.299334	-0.687678	0.491656	0.989825	384.752	-0.285156	0.389876	-0.731402	0.464534	0.948063	350.893	-0.23924	0.229302	-1.04334	0.296792	0.707537
ENSSSCG00000004177	RPS12	86589	0.174903	0.11808	1.48123	0.138546	0.372177	100071	0.152519	0.2095	0.728012	0.466606	0.98867	84454.1	0.289259	0.259241	1.11579	0.264511	0.893514	92628.4	0.215946	0.208803	1.03421	0.301038	0.712395
ENSSSCG00000004178	SLC18B1	86.7262	0.228161	0.125525	1.81766	0.0691166	0.247627	80.6191	0.209116	0.379879	0.55048	0.58199	0.993215	85.8756	0.310562	0.314444	0.987652	0.323323	0.911283	83.0983	0.260193	0.201889	1.28879	0.19747	0.618908
ENSSSCG00000004179		428.686	0.895256	0.31563	2.83641	0.0045624	0.0441198	318.321	0.874587	0.325283	2.68869	0.00717321	0.244076	478.935	1.35981	0.50399	2.69809	0.00697394	0.297991	394.676	1.20507	0.332787	3.62114	0.000293312	0.0183008
ENSSSCG00000004180		112.138	0.465487	0.211032	2.20577	0.0274004	0.140332	111.637	0.45846	0.375237	1.22179	0.221787	0.92343	116.996	0.194536	0.413651	0.47029	0.638148	0.976787	114.173	0.323227	0.245659	1.31576	0.188256	0.609006
ENSSSCG00000004181	VNN1	388.395	0.581085	0.460498	1.26186	0.206999	0.466352	237.107	1.18152	0.410345	2.87934	0.0039851	0.167997	334.045	0.274033	0.598451	0.457904	0.647022	0.976787	283.173	0.823222	0.410747	2.00421	0.0450478	0.340117
ENSSSCG00000004190	STX7	555.155	0.12175	0.113376	1.07386	0.282884	0.548193	593.176	0.213711	0.23614	0.905019	0.365455	0.968461	574.125	-0.0553596	0.266678	-0.20759	0.835549	0.989698	584.019	0.087867	0.164092	0.535472	0.592323	0.880611
ENSSSCG00000004191	MOXD1	25.6564	0.468323	0.376116	1.24516	0.213075	0.474306	25.2268	-0.363525	0.854025	-0.425661	0.670355	0.995655	27.9472	1.08308	0.611468	1.77128	0.0765136	0.688574	26.514	0.444409	0.571085	0.778183	0.436461	0.803468
ENSSSCG00000004192	CCN2	25.0123	0.26307	0.37516	0.701221	0.483165	0.714701	25.7366	-0.110882	0.539038	-0.205703	0.837023	0.997873	26.5432	-0.66994	0.549853	-1.2184	0.223072	0.867293	26.1161	-0.367984	0.339609	-1.08355	0.278563	0.692273
ENSSSCG00000004193	ENPP1	463.234	-1.79391	0.475305	-3.77423	0.0001605	0.00405544	256.239	-1.55959	0.398094	-3.91764	8.94197e-05	0.0120627	726.568	-2.93825	1.27571	-2.30322	0.0212662	0.46421	479.25	-2.46319	0.694551	-3.54645	0.000390464	0.0220179
ENSSSCG00000004195	ARG1	232171	0.162775	0.155844	1.04448	0.296265	0.561104	265609	0.13957	0.332857	0.41931	0.67499	0.995655	265667	0.730714	0.371114	1.96898	0.0489558	0.610279	265580	0.4135	0.267473	1.54595	0.122116	0.520188
ENSSSCG00000004196	MED23	2679.04	-0.0883364	0.0965623	-0.914812	0.36029	0.618489	2269.37	-0.136435	0.143339	-0.951835	0.341181	0.967942	2849.08	0.0369934	0.25269	0.146398	0.883607	0.99083	2544.51	-0.0359703	0.138081	-0.260501	0.794477	0.954868
ENSSSCG00000004199	EPB41L2	526.283	0.166606	0.144614	1.15207	0.249292	0.51481	390.191	-0.112799	0.327039	-0.34491	0.730162	0.995655	560.054	0.247544	0.312726	0.791567	0.428613	0.93928	470.944	0.0906039	0.239011	0.379078	0.70463	0.925767
ENSSSCG00000004202	SAMD3	237.508	-0.482251	0.19529	-2.46942	0.0135334	0.0904216	190.012	-0.321054	0.310609	-1.03363	0.301311	0.960992	240.787	-0.210346	0.380732	-0.552477	0.580621	0.966659	214.118	-0.334928	0.303947	-1.10193	0.270493	0.686651
ENSSSCG00000004203	L3MBTL3	716.962	-0.0594672	0.126451	-0.470278	0.638156	0.814871	651.795	-0.0429651	0.182712	-0.235152	0.814091	0.99681	649.495	-0.255588	0.286371	-0.892505	0.372122	0.920068	650.561	-0.143367	0.146233	-0.9804	0.326889	0.732966
ENSSSCG00000004205	ARHGAP18	1326.14	0.00215454	0.209243	0.0102968	0.991784	0.995147	1160.84	-0.244943	0.173282	-1.41355	0.157494	0.856492	1507.28	-0.384275	0.293697	-1.3084	0.190736	0.836213	1325.51	-0.32009	0.162748	-1.96678	0.0492082	0.354819
ENSSSCG00000004209	PTPRK	192.233	-0.270985	0.177075	-1.53034	0.125932	0.352886	127.515	0.203735	0.424584	0.479846	0.631337	0.995655	217.656	-0.830894	0.377039	-2.20374	0.0275429	0.513196	170.334	-0.407544	0.332845	-1.22443	0.220791	0.64166
ENSSSCG00000004216	ECHDC1	187.476	-0.213165	0.121313	-1.75716	0.0788912	0.267493	129.93	-0.034506	0.27563	-0.125189	0.900374	0.998795	154.234	-0.536347	0.306962	-1.74728	0.0805896	0.697202	141.458	-0.287633	0.163271	-1.76169	0.0781211	0.436348
ENSSSCG00000004217	RNF146	1940.6	-0.268747	0.0994172	-2.70322	0.00686712	0.0568319	1713.47	-0.209572	0.19712	-1.06317	0.287705	0.96026	1856.9	-0.170887	0.225206	-0.758803	0.447971	0.944547	1781.16	-0.190304	0.117393	-1.62108	0.105	0.49457
ENSSSCG00000004220	TRMT11	543.991	0.121027	0.105896	1.14288	0.253088	0.518321	502.199	-0.0531894	0.178009	-0.298803	0.765091	0.995655	609.289	0.121548	0.205667	0.590997	0.554522	0.96456	553.033	0.0397338	0.0997329	0.398402	0.690334	0.921781
ENSSSCG00000004221	HINT3	144.377	-0.103082	0.131336	-0.78487	0.43253	0.676562	125.306	-0.245979	0.268203	-0.917138	0.35907	0.967942	172.868	-0.0587392	0.34553	-0.169998	0.865012	0.99083	147.892	-0.148543	0.21575	-0.688496	0.491141	0.833769
ENSSSCG00000004222	NCOA7	66899.3	-0.0936682	0.142772	-0.656067	0.511781	0.735797	58209.1	-0.377677	0.180324	-2.09444	0.0362208	0.533309	69426.8	0.425693	0.357137	1.19196	0.233277	0.87498	63539.1	0.0462074	0.227486	0.203122	0.839039	0.968294
ENSSSCG00000004223	HEY2	13.0683	0.258509	0.399015	0.647867	0.517071	0.738861	9.75155	0.841226	0.847826	0.992215	0.321092	0.966214	11.4803	0.013695	0.914569	0.0149743	0.988053	0.998768	10.5683	0.416421	0.515741	0.807423	0.419423	0.793085
ENSSSCG00000004224	HDDC2	658.12	-0.216888	0.102584	-2.11425	0.0344936	0.162878	559.694	-0.243681	0.239681	-1.01669	0.309302	0.960992	768.308	-0.278565	0.221605	-1.25703	0.208741	0.851108	658.762	-0.269833	0.171194	-1.57618	0.114984	0.509413
ENSSSCG00000004225	TPD52L1	41.0982	0.314737	0.366717	0.858255	0.390751	0.64501	29.901	-0.0293199	0.913185	-0.0321073	0.974386	0.998818	25.055	0.260502	0.671343	0.388031	0.697993	0.979188	27.5875	0.063354	0.678819	0.0933298	0.925642	0.988951
ENSSSCG00000004233	SMPDL3A	14.8408	0.521528	0.3301	1.57991	0.114127	0.33265	11.7053	0.536909	0.841656	0.63792	0.523526	0.993041	16.4416	0.321347	0.773159	0.415628	0.677682	0.979182	13.951	0.399945	0.470908	0.849307	0.39571	0.77971
ENSSSCG00000004236	PKIB	27.1721	1.03696	0.340506	3.04536	0.00232404	0.0275329	30.6369	0.582667	0.513697	1.13426	0.256685	0.944599	33.4094	0.375366	0.503357	0.745724	0.455834	0.946614	31.9494	0.472376	0.272292	1.73482	0.0827732	0.44553
ENSSSCG00000004237	SERINC1	4770.22	0.0340511	0.118905	0.286373	0.774593	0.891223	4096.45	-0.0888099	0.273375	-0.324865	0.745283	0.995655	4167.37	0.422476	0.300088	1.40784	0.159178	0.810357	4129.24	0.156634	0.209531	0.747548	0.454733	0.813036
ENSSSCG00000004238	HSF2	239.226	-0.155496	0.132489	-1.17365	0.240536	0.505619	189.17	-0.0829564	0.241338	-0.343735	0.731045	0.995655	222.267	-0.285215	0.467021	-0.610711	0.541391	0.963163	204.864	-0.187971	0.240596	-0.781275	0.434641	0.803053
ENSSSCG00000004242	TBC1D32	11.8726	-0.180544	0.365033	-0.494598	0.620884	0.806368	11.0629	-0.128273	0.770938	-0.166385	0.867854	0.998795	17.2566	-0.106108	0.731786	-0.144999	0.884712	0.99083	14.0067	-0.0758479	0.457343	-0.165844	0.868279	0.975313
ENSSSCG00000004244	MAN1A1	1499.36	0.2827	0.105223	2.68668	0.00721652	0.0588543	1440.08	0.20744	0.218195	0.950707	0.341753	0.967942	1475.24	0.414291	0.259667	1.59547	0.110608	0.745006	1456.48	0.298058	0.17012	1.75204	0.0797672	0.439862
ENSSSCG00000004246		303.248	-0.22813	0.11405	-2.00027	0.0454711	0.193448	234.623	-0.0636324	0.245586	-0.259105	0.795555	0.995655	315.862	-0.463748	0.303038	-1.53033	0.125935	0.770338	273.175	-0.281607	0.185319	-1.51958	0.128617	0.529421
ENSSSCG00000004247	ASF1A	285.655	0.040121	0.125456	0.319802	0.749119	0.880118	294.418	-0.0959928	0.240156	-0.39971	0.68937	0.995655	282.27	0.408954	0.38151	1.07193	0.28375	0.899985	288.575	0.138098	0.218217	0.632845	0.526835	0.849184
ENSSSCG00000004249	CEP85L	1646.76	-0.0859339	0.105305	-0.816048	0.414473	0.662384	1310.91	-0.0413151	0.195004	-0.211868	0.83221	0.997873	1704.85	-0.178729	0.25409	-0.703409	0.481801	0.952351	1498.03	-0.114655	0.151314	-0.757728	0.448614	0.809769
ENSSSCG00000004253		774.051	-0.0391709	0.0947545	-0.413393	0.679319	0.839825	733.893	0.0155024	0.184126	0.0841945	0.932902	0.998795	798.18	-0.110396	0.221485	-0.498434	0.618178	0.971288	764.308	-0.04383	0.109352	-0.400817	0.688555	0.921058
ENSSSCG00000004254	DCBLD1	61.0066	0.269398	0.172817	1.55886	0.119029	0.341593	51.8283	0.460843	0.411633	1.11955	0.262906	0.949333	64.1287	0.000872009	0.44544	0.00195764	0.998438	0.999429	57.6671	0.228738	0.251038	0.911169	0.362206	0.756697
ENSSSCG00000004261		33.6216	0.328598	0.355965	0.923119	0.355945	0.614676	17.2502	0.043619	0.757284	0.0575992	0.954068	0.998801	18.4962	1.00388	0.848405	1.18326	0.236707	0.875585	17.8367	0.460401	0.459911	1.00107	0.316795	0.725138
ENSSSCG00000004262	KPNA5	241.426	0.144789	0.128407	1.12758	0.259496	0.524507	232.832	0.0708539	0.210523	0.336562	0.736447	0.995655	277.352	0.203871	0.255804	0.796979	0.425463	0.937576	253.972	0.142504	0.119713	1.19038	0.233898	0.65345
ENSSSCG00000004263	ZUP1	307.355	-0.016668	0.106828	-0.156026	0.876013	0.942777	274.23	-0.0580804	0.264425	-0.219648	0.826146	0.99681	340.356	-0.0852528	0.225018	-0.378871	0.704784	0.981374	305.592	-0.0652111	0.155761	-0.418662	0.675463	0.9141
ENSSSCG00000004272	LMBRD1	551.212	-0.127272	0.100182	-1.2704	0.203941	0.462008	501.783	-0.146983	0.241616	-0.608332	0.542967	0.993215	556.288	-0.0617229	0.218028	-0.283096	0.777103	0.986962	527.6	-0.103013	0.131256	-0.784827	0.432555	0.801973
ENSSSCG00000004275	FAM135A	348.473	-0.00954016	0.15445	-0.0617687	0.950747	0.97571	209.558	-0.341151	0.278702	-1.22407	0.220924	0.923093	374.732	0.205346	0.281191	0.730273	0.465223	0.948279	288.093	-0.000471618	0.265528	-0.00177615	0.998583	0.999698
ENSSSCG00000004276	SMAP1	1137.01	0.081225	0.0995517	0.815907	0.414553	0.662384	990.551	-0.01498	0.167597	-0.089381	0.928779	0.998795	1147.01	-0.0381422	0.222416	-0.17149	0.863838	0.99083	1064.81	-0.0259974	0.109948	-0.236451	0.813083	0.959226
ENSSSCG00000004279	OGFRL1	1347.61	0.0681298	0.127048	0.536251	0.591785	0.787863	1114.58	0.229099	0.209014	1.09609	0.273038	0.952738	1458.86	0.0408291	0.27706	0.147366	0.882843	0.99083	1278.15	0.127491	0.16727	0.762189	0.445947	0.808778
ENSSSCG00000004281	KCNQ5	577.201	-0.194713	0.116145	-1.67646	0.0936485	0.296416	399.696	-0.198196	0.25681	-0.771763	0.440255	0.984222	432.759	-0.101461	0.326556	-0.3107	0.756029	0.984711	415.334	-0.139968	0.190496	-0.734752	0.462491	0.817656
ENSSSCG00000004283	DPPA5	99.038	-0.296868	0.149156	-1.99032	0.0465561	0.196433	87.399	-0.252863	0.320361	-0.789305	0.429934	0.983944	120.544	-0.386102	0.31896	-1.2105	0.226086	0.868682	103.148	-0.357484	0.376232	-0.950168	0.342027	0.743689
ENSSSCG00000004284		47.6886	0.101288	0.245917	0.411881	0.680427	0.840654	33.6776	0.375133	0.48354	0.775806	0.437863	0.983944	57.3763	-0.527456	0.57497	-0.917364	0.358952	0.920068	44.9473	-0.0670865	0.497782	-0.134771	0.892793	0.981045
ENSSSCG00000004289	CEP162	1601.3	0.239668	0.100666	2.38084	0.0172734	0.105899	1511.63	0.0974355	0.176185	0.553029	0.580243	0.993215	1746.5	0.49582	0.21847	2.26951	0.0232375	0.48338	1623.11	0.298403	0.124185	2.4029	0.0162656	0.202224
ENSSSCG00000004293	SNX14	2537.13	0.0857365	0.0778537	1.10125	0.270787	0.536854	2425.31	-0.00760853	0.148661	-0.0511804	0.959182	0.998818	2766.98	0.0725801	0.171861	0.422319	0.672792	0.979182	2587.29	0.0357959	0.0798216	0.448449	0.653829	0.905801
ENSSSCG00000004294	SYNCRIP	4074.54	-0.085264	0.0613135	-1.39062	0.16434	0.410199	3716.97	-0.141086	0.168887	-0.835387	0.4035	0.983944	4204.59	-0.0755076	0.206417	-0.365801	0.714513	0.982965	3947.83	-0.110282	0.107313	-1.02766	0.304109	0.7148
ENSSSCG00000004300	SMIM8	65.7617	-0.365132	0.243509	-1.49946	0.133754	0.364451	54.8516	-0.0128063	0.360861	-0.0354881	0.971691	0.998818	76.3081	-0.687435	0.428525	-1.60419	0.108673	0.741524	65.0463	-0.367914	0.255319	-1.441	0.149585	0.55899
ENSSSCG00000004303	RARS2	225.231	-0.115097	0.120485	-0.955281	0.339436	0.600655	225.145	-0.19728	0.260194	-0.758204	0.448329	0.988535	252.729	-0.107876	0.260168	-0.41464	0.678405	0.979182	238.216	-0.149114	0.147075	-1.01387	0.310645	0.721305
ENSSSCG00000004304	SLC35A1	358.298	0.331365	0.124121	2.66968	0.0075923	0.0607202	318.341	0.322678	0.300202	1.07487	0.282434	0.956837	383.11	0.265067	0.256441	1.03364	0.301307	0.903854	349.1	0.286533	0.187435	1.5287	0.126339	0.525839
ENSSSCG00000004306	ORC3	655.284	-0.0691618	0.108332	-0.638424	0.523198	0.743177	617.781	0.210311	0.209186	1.00538	0.314715	0.961608	624.449	-0.380024	0.200332	-1.89697	0.0578322	0.646064	620.786	-0.0717512	0.14659	-0.489468	0.62451	0.897193
ENSSSCG00000004307	AKIRIN2	1116.43	-0.00535314	0.105633	-0.050677	0.959583	0.979177	768.662	-0.0516713	0.212505	-0.243153	0.807887	0.996517	837.191	0.09734	0.247893	0.39267	0.694563	0.979182	801.142	0.0225841	0.139175	0.162271	0.871092	0.975951
ENSSSCG00000004311	RNGTT	1874.46	-0.0626782	0.0675245	-0.928229	0.353289	0.612631	1743.17	-0.0607514	0.16679	-0.36424	0.715679	0.995655	1959.36	-0.0669404	0.172428	-0.388221	0.697852	0.979188	1845.62	-0.0633788	0.0748834	-0.846367	0.397348	0.780683
ENSSSCG00000004314	PM20D2	117.158	-0.915823	0.157141	-5.82803	5.60852e-09	1.46437e-06	87.073	-1.22487	0.351147	-3.48821	0.000486258	0.040743	116.556	-1.04502	0.340127	-3.07243	0.00212323	0.182136	101.073	-1.125	0.203759	-5.52121	3.36674e-08	2.63339e-05
ENSSSCG00000004317	UBE2J1	4049.57	0.156413	0.164437	0.951204	0.341501	0.602628	3060.46	0.0740258	0.165841	0.446366	0.655333	0.995655	3545.69	-0.18423	0.262869	-0.700846	0.483399	0.952351	3290.85	-0.0563326	0.138816	-0.405808	0.684884	0.918243
ENSSSCG00000004318	RRAGD	123.862	-0.049293	0.154081	-0.319916	0.749032	0.880095	104.894	-0.0598128	0.319165	-0.187404	0.851344	0.998795	131.73	-0.117435	0.329533	-0.356369	0.721564	0.983197	117.639	-0.0771576	0.251481	-0.306812	0.758986	0.945278
ENSSSCG00000004322	ANKRD6	786.181	0.29385	0.471903	0.622692	0.533487	0.750297	575.1	-0.0937557	0.233414	-0.401672	0.687926	0.995655	828.846	-0.48391	0.321884	-1.50337	0.132744	0.777138	695.757	-0.332105	0.22164	-1.4984	0.13403	0.536319
ENSSSCG00000004324		101.897	-0.138981	0.160916	-0.863686	0.38776	0.642136	93.6461	-0.466644	0.346974	-1.34489	0.17866	0.89145	101.06	0.00343039	0.440656	0.00778473	0.993789	0.999327	97.1507	-0.226471	0.245645	-0.921946	0.356557	0.752682
ENSSSCG00000004328	MDN1	3944.94	0.0701003	0.0973945	0.719756	0.471675	0.707023	3314.4	0.0719202	0.18466	0.389472	0.696927	0.995655	3360.2	0.124699	0.21941	0.568336	0.569807	0.96598	3335.56	0.0977429	0.12378	0.789652	0.429731	0.80004
ENSSSCG00000004331	CASP8AP2	787.147	-0.0161081	0.1187	-0.135705	0.892055	0.94919	740.094	0.0175311	0.177849	0.0985728	0.921477	0.998795	867.771	-0.199235	0.348187	-0.572208	0.567181	0.96573	800.583	-0.0942335	0.176455	-0.534038	0.593315	0.88092
ENSSSCG00000004332	BACH2	3995	-0.170837	0.125361	-1.36276	0.172959	0.422513	2804.06	-0.46734	0.21753	-2.14839	0.0316828	0.499299	2747.01	0.141237	0.180986	0.780373	0.435171	0.942138	2776.29	-0.162508	0.157756	-1.03012	0.302951	0.713637
ENSSSCG00000004334	MAP3K7	3126.79	-0.171963	0.118728	-1.44838	0.147509	0.385747	2816.04	-0.515995	0.181961	-2.83575	0.0045718	0.186325	3212.91	0.14114	0.206512	0.683447	0.494325	0.95501	3004.29	-0.18173	0.150352	-1.20869	0.226781	0.647075
ENSSSCG00000004339	UFL1	1171.64	-0.0767523	0.0786082	-0.97639	0.328871	0.591284	1058.22	-0.0610104	0.164079	-0.371836	0.710015	0.995655	1260.37	-0.109691	0.195906	-0.559916	0.575537	0.966659	1154.07	-0.0881977	0.102303	-0.862121	0.388621	0.775511
ENSSSCG00000004342	NDUFAF4	108.869	-0.315854	0.189547	-1.66636	0.0956415	0.299469	77.5921	-0.139925	0.323734	-0.432223	0.665579	0.995655	121.673	-0.459872	0.406754	-1.13059	0.258228	0.889129	98.5524	-0.317207	0.256542	-1.23647	0.216283	0.639975
ENSSSCG00000004344	MMS22L	647.839	-0.139505	0.109886	-1.26954	0.204248	0.46231	557.172	-0.0183403	0.204831	-0.0895386	0.928654	0.998795	684.287	-0.148974	0.229452	-0.649262	0.516169	0.958922	617.492	-0.0844616	0.134216	-0.629296	0.529155	0.849788
ENSSSCG00000004347	FBXL4	417.133	-0.239534	0.129231	-1.85353	0.0638071	0.23558	331.322	-0.154186	0.20755	-0.742886	0.457551	0.98867	449.237	-0.285095	0.275921	-1.03325	0.301487	0.903854	387.328	-0.242511	0.165195	-1.46803	0.142096	0.548626
ENSSSCG00000004349	FAXC	99.9287	-0.0948835	0.153461	-0.61829	0.536384	0.751827	94.8704	-0.223716	0.332167	-0.673505	0.500626	0.989825	103.884	-0.0418321	0.496593	-0.0842382	0.932867	0.997652	99.1134	-0.138616	0.263332	-0.526392	0.598616	0.883934
ENSSSCG00000004351	USP45	884.989	-0.286484	0.103225	-2.77533	0.00551456	0.049722	775.829	-0.208912	0.191004	-1.09375	0.274063	0.954327	910.42	-0.313136	0.206208	-1.51854	0.128877	0.774333	839.659	-0.262502	0.106436	-2.4663	0.0136518	0.184354
ENSSSCG00000004353	CCNC	1055.37	-0.0700544	0.0806269	-0.868872	0.384917	0.639975	934.963	-0.0171575	0.172936	-0.0992129	0.920969	0.998795	1181.32	-0.0898262	0.19978	-0.449626	0.65298	0.977132	1051.89	-0.0571865	0.110855	-0.515869	0.605946	0.887645
ENSSSCG00000004358	ASCC3	2994.4	-0.0357516	0.0729181	-0.490298	0.623923	0.808187	2809.54	-0.0699471	0.14553	-0.480638	0.630774	0.995655	3155.74	-0.0689385	0.197075	-0.349809	0.726482	0.983197	2973.52	-0.0691096	0.079899	-0.864961	0.38706	0.7745
ENSSSCG00000004364	HACE1	621.928	-0.0739001	0.0956338	-0.77274	0.439676	0.681417	592.755	-0.188645	0.167595	-1.1256	0.260333	0.94599	638.408	-0.0162629	0.251878	-0.0645667	0.948519	0.998416	614.334	-0.101311	0.112004	-0.904535	0.365712	0.758733
ENSSSCG00000004368	PREP	469.173	0.109775	0.139743	0.785546	0.432133	0.676189	307.537	0.0929986	0.27135	0.342726	0.731805	0.995655	361.149	0.1513	0.348801	0.433772	0.664454	0.978874	332.977	0.130392	0.216898	0.601168	0.547728	0.861149
ENSSSCG00000004369	PRDM1	2732.67	0.405826	0.1602	2.53324	0.0113014	0.0800474	1986.4	0.302303	0.167964	1.79981	0.0718899	0.687798	2172.99	0.623605	0.258303	2.41424	0.0157682	0.415454	2074.76	0.476674	0.163944	2.90754	0.00364285	0.0856802
ENSSSCG00000004370	ATG5	1072.53	0.01817	0.0793834	0.228889	0.818955	0.914393	970.58	-0.0153334	0.193241	-0.0793487	0.936755	0.998795	1183.85	-0.00367604	0.185413	-0.0198262	0.984182	0.998768	1071.86	-0.0116508	0.110589	-0.105352	0.916096	0.986909
ENSSSCG00000004371	CRYBG1	832.862	-0.0641453	0.157285	-0.407829	0.683399	0.842804	619.091	-0.107251	0.205201	-0.522665	0.601207	0.994088	706.822	0.164655	0.367119	0.448506	0.653788	0.977132	660.667	0.0306279	0.194889	0.157156	0.875122	0.976892
ENSSSCG00000004373	RTN4IP1	220.247	-0.195959	0.141754	-1.38238	0.166854	0.413172	174.409	0.0377805	0.259441	0.145623	0.884219	0.998795	220.258	-0.549272	0.291398	-1.88495	0.0594361	0.64714	196.144	-0.272134	0.209381	-1.29971	0.193702	0.616026
ENSSSCG00000004374	QRSL1	260.17	0.0726428	0.132869	0.546725	0.584568	0.783261	237.072	0.116188	0.247804	0.468872	0.639161	0.995655	250.84	-0.206951	0.265711	-0.778856	0.436064	0.942458	243.557	-0.052621	0.151925	-0.346363	0.72907	0.934355
ENSSSCG00000004382	SEC63	1358.18	-0.051685	0.0875289	-0.590491	0.554862	0.764569	1093.43	0.0440807	0.178468	0.246994	0.804913	0.995897	1361.92	-0.145054	0.213779	-0.678521	0.497441	0.955093	1220.89	-0.0571507	0.123834	-0.461511	0.644432	0.902959
ENSSSCG00000004383	OSTM1	866.639	0.462003	0.11834	3.90405	9.45979e-05	0.00268586	835.813	0.303188	0.211249	1.43522	0.151225	0.850367	924.779	0.322935	0.267602	1.20677	0.22752	0.870462	878.029	0.319206	0.14895	2.14304	0.0321099	0.287922
ENSSSCG00000004384	NR2E1	20.0518	0.471258	0.393737	1.19689	0.231351	0.495126	13.0012	0.20652	0.6977	0.296001	0.767229	0.995655	22.7471	0.863408	0.766382	1.1266	0.25991	0.891933	17.6364	0.568021	0.453945	1.2513	0.210825	0.633639
ENSSSCG00000004385	SNX3	14787.2	-0.0723161	0.149654	-0.483222	0.628938	0.810504	12165.8	-0.201914	0.245752	-0.821617	0.411295	0.983944	14749.7	0.475102	0.277	1.71517	0.0863137	0.710366	13392.8	0.150404	0.198159	0.759009	0.447847	0.809769
ENSSSCG00000004387	FOXO3	65129.6	-0.272485	0.185487	-1.46903	0.141825	0.377563	42145.1	-0.556895	0.214491	-2.59636	0.00942175	0.284846	41682.6	0.41794	0.394796	1.05862	0.289772	0.899985	41918	-0.0853397	0.253346	-0.33685	0.73623	0.936664
ENSSSCG00000004388	ARMC2	21.6306	-0.125626	0.309757	-0.405564	0.685063	0.843532	12.8924	0.343539	0.757318	0.453625	0.650099	0.995655	30.2233	0.225213	0.529506	0.425327	0.670598	0.97917	21.1396	0.263646	0.445017	0.592441	0.553555	0.863352
ENSSSCG00000004390	SESN1	720.505	0.097671	0.112875	0.865303	0.386873	0.641304	666.966	0.121323	0.17684	0.68606	0.492675	0.989825	753.22	0.210031	0.285358	0.736026	0.461715	0.948063	707.82	0.16088	0.137716	1.1682	0.242727	0.661851
ENSSSCG00000004391	CEP57L1	42.4541	-0.606834	0.20194	-3.00503	0.00265556	0.0300692	43.461	-0.653137	0.475165	-1.37455	0.169272	0.877617	42.1906	-0.662545	0.625069	-1.05995	0.289166	0.899985	42.8386	-0.654463	0.341623	-1.91575	0.055397	0.374964
ENSSSCG00000004392	AMD1	2921.84	-0.0856461	0.0941964	-0.909229	0.363229	0.621035	2547.54	-0.283619	0.1937	-1.46422	0.143135	0.843884	2923.89	-0.123161	0.19932	-0.617907	0.536636	0.962346	2725.81	-0.200673	0.111428	-1.80093	0.0717143	0.420295
ENSSSCG00000004393	GTF3C6	367.512	0.0166062	0.157525	0.10542	0.916043	0.961339	292.546	-0.141456	0.203688	-0.694476	0.487384	0.988754	368.779	-0.253366	0.233401	-1.08554	0.277682	0.899985	328.733	-0.195467	0.131498	-1.48646	0.137156	0.540233
ENSSSCG00000004394	RPF2	304.191	-0.213374	0.118106	-1.80664	0.0708191	0.250539	301.595	0.0538773	0.239309	0.225137	0.821873	0.99681	284.56	-0.456033	0.27127	-1.6811	0.0927433	0.718625	293.381	-0.180229	0.173519	-1.03867	0.298958	0.709841
ENSSSCG00000004399	SLC22A16	43.2776	0.413458	0.267925	1.54319	0.122786	0.347359	37.1477	-0.253723	0.682536	-0.371736	0.710089	0.995655	55.7454	1.14576	0.389316	2.94301	0.00325041	0.213893	45.996	0.439433	0.436203	1.0074	0.313741	0.723188
ENSSSCG00000004403	CDC40	507.669	0.0168013	0.104752	0.160391	0.872573	0.941403	447.985	0.132607	0.212251	0.624765	0.532125	0.993215	521.812	-0.175787	0.241223	-0.728731	0.466166	0.94872	482.955	-0.0227779	0.137103	-0.166137	0.868049	0.975254
ENSSSCG00000004405	FIG4	604.346	-0.142238	0.0898408	-1.58322	0.113371	0.331355	549.551	-0.137637	0.189636	-0.725794	0.467965	0.98867	616.738	-0.215073	0.204539	-1.0515	0.293031	0.901475	581.371	-0.17713	0.0974633	-1.8174	0.0691562	0.414722
ENSSSCG00000004408	SMPD2	382.134	0.0337474	0.103038	0.327524	0.743271	0.875876	355.772	0.197265	0.18681	1.05597	0.290983	0.960579	357.627	0.0266945	0.220934	0.120826	0.903829	0.993328	356.572	0.114703	0.108186	1.06024	0.289035	0.701987
ENSSSCG00000004411	ZBTB24	840.517	-0.299147	0.131751	-2.27054	0.0231747	0.127729	681.691	-0.405455	0.204043	-1.98711	0.0469103	0.586207	832.081	-0.0867698	0.283691	-0.305861	0.759711	0.985148	752.957	-0.239361	0.190713	-1.25508	0.209449	0.631851
ENSSSCG00000004412	MICAL1	1733.55	-0.0408824	0.1113	-0.367318	0.713382	0.859829	1493.98	-0.130042	0.161743	-0.804006	0.421394	0.983944	1550.95	0.135331	0.191766	0.70571	0.480368	0.952086	1520.75	-0.00175998	0.10029	-0.0175488	0.985999	0.99792
ENSSSCG00000004414	CD164	3030.49	0.101253	0.101389	0.998655	0.317962	0.581947	2022.51	-0.158048	0.149286	-1.05869	0.28974	0.960579	2421.72	0.134409	0.248766	0.540301	0.58899	0.966821	2212.07	-0.00587076	0.124957	-0.0469823	0.962527	0.994671
ENSSSCG00000004415		1493.8	-0.262061	0.147094	-1.78159	0.0748167	0.259027	1728.87	-0.416029	0.28203	-1.47512	0.140179	0.839946	1644.13	-0.190142	0.426779	-0.445529	0.655938	0.977132	1688.35	-0.310545	0.258872	-1.19961	0.230291	0.649773
ENSSSCG00000004419	SLC16A10	104.847	-0.153319	0.194972	-0.786366	0.431653	0.67591	89.9307	-0.0102217	0.542353	-0.0188469	0.984963	0.999052	89.3858	-0.0171875	0.30886	-0.0556481	0.955622	0.998416	89.6531	-0.0614754	0.362156	-0.169748	0.865208	0.974788
ENSSSCG00000004420	TRAF3IP2	87.7696	0.35879	0.19738	1.81776	0.0691008	0.247627	75.4276	0.591779	0.400067	1.4792	0.139087	0.838748	79.0261	0.469849	0.535948	0.876669	0.380667	0.922287	77.1257	0.509147	0.331631	1.53528	0.124715	0.523331
ENSSSCG00000004421	FYN	4535.26	0.0532272	0.0816948	0.651537	0.5147	0.738009	3789.28	0.107157	0.152499	0.702673	0.48226	0.98867	4124.44	0.00481629	0.264555	0.0182052	0.985475	0.998768	3947.86	0.0548514	0.126754	0.432739	0.665204	0.909871
ENSSSCG00000004423	TUBE1	99.8327	-0.350085	0.17866	-1.9595	0.0500543	0.205273	107.169	-0.0291698	0.295914	-0.0985754	0.921475	0.998795	106.586	-0.626533	0.454051	-1.37988	0.167625	0.814924	106.838	-0.311199	0.246661	-1.26164	0.207077	0.630274
ENSSSCG00000004432	HDAC2	1721.54	-0.0447928	0.0886586	-0.505228	0.613399	0.802044	1605.6	0.0367628	0.179881	0.204373	0.838062	0.997873	1806.45	-0.230031	0.256669	-0.896218	0.370137	0.920068	1700.65	-0.0980077	0.135882	-0.721273	0.470741	0.822211
ENSSSCG00000004435	NT5DC1	186.761	0.131098	0.156272	0.838909	0.40152	0.653624	180.415	0.268228	0.262574	1.02153	0.307001	0.960992	175.982	-0.0879638	0.343945	-0.25575	0.798144	0.988618	178.283	0.118051	0.231786	0.50931	0.610535	0.889203
ENSSSCG00000004438	TSPYL1	4783.57	0.113944	0.150441	0.757401	0.44881	0.687886	4539.76	-0.0167645	0.209739	-0.0799304	0.936293	0.998795	4421.73	0.642519	0.344422	1.8655	0.0621114	0.653425	4482.54	0.289123	0.215007	1.34472	0.178716	0.598458
ENSSSCG00000004441	DSE	132.535	0.00842762	0.151587	0.0555959	0.955664	0.97754	101.097	0.211787	0.368863	0.574163	0.565858	0.993215	164.701	-0.17881	0.359221	-0.497772	0.618645	0.971536	131.351	-0.0211403	0.278455	-0.0759202	0.939483	0.991567
ENSSSCG00000004446	RWDD1	924.652	0.0153539	0.0855599	0.179452	0.857583	0.933534	1121.85	-0.00290066	0.210334	-0.0137907	0.988997	0.999052	1011.56	-0.0256904	0.22892	-0.112225	0.910645	0.994685	1069.03	-0.0172762	0.158283	-0.109147	0.913086	0.986213
ENSSSCG00000004456	PGM3	64.899	0.0915172	0.193015	0.474144	0.635397	0.813351	50.5202	-0.114937	0.410778	-0.279804	0.779628	0.995655	66.7798	-0.152659	0.428228	-0.356489	0.721474	0.983197	58.2479	-0.137689	0.24107	-0.571156	0.567894	0.870839
ENSSSCG00000004457	DOP1A	1714.62	-0.123342	0.0868263	-1.42056	0.155444	0.397209	1495.38	-0.0642592	0.159486	-0.402916	0.68701	0.995655	1728.18	-0.285606	0.245498	-1.16337	0.244678	0.87755	1605.64	-0.1767	0.118782	-1.4876	0.136858	0.540233
ENSSSCG00000004460	IBTK	1516.02	-0.0476601	0.0791467	-0.602174	0.547058	0.759369	1221.14	-0.0439794	0.16738	-0.262752	0.792742	0.995655	1607.63	0.057302	0.199849	0.286726	0.774322	0.986962	1404.8	0.0119453	0.12371	0.096559	0.923077	0.98873
ENSSSCG00000004464	TENT5A	615.104	-0.0322584	0.189453	-0.170271	0.864797	0.937586	591.821	0.278327	0.293375	0.948706	0.34277	0.967942	617.391	-0.00737828	0.382789	-0.019275	0.984622	0.998768	603.801	0.151014	0.24439	0.617923	0.536626	0.854438
ENSSSCG00000004465	BCKDHB	189.312	-0.191041	0.193548	-0.987046	0.32362	0.587392	149.206	-0.295362	0.327725	-0.901249	0.367456	0.971085	180.666	-0.484291	0.42557	-1.13798	0.255129	0.886292	164.103	-0.396726	0.245546	-1.61569	0.106162	0.495863
ENSSSCG00000004466	TTK	1610	0.215099	0.0943504	2.27979	0.0226199	0.125724	1494.03	0.0750893	0.186551	0.402513	0.687306	0.995655	1796.62	0.457925	0.219131	2.08973	0.0366417	0.556814	1637.57	0.267989	0.142974	1.87439	0.060877	0.393308
ENSSSCG00000004469	LCA5	40.4628	0.0162664	0.274934	0.0591647	0.952821	0.976474	33.1143	-0.889614	0.481574	-1.84731	0.0647028	0.6668	45.5295	1.01967	0.756998	1.34699	0.177984	0.826308	39.015	0.156513	0.476717	0.328313	0.742675	0.939374
ENSSSCG00000004470	HMGN3	649.386	-0.30965	0.168192	-1.84105	0.0656145	0.240166	622.455	-0.335908	0.242616	-1.38452	0.166199	0.871822	812.994	-0.672206	0.387974	-1.73261	0.0831655	0.703955	712.702	-0.513567	0.227211	-2.26031	0.0238021	0.251791
ENSSSCG00000004472	IRAK1BP1	28.2515	-0.586888	0.277168	-2.11744	0.0342224	0.161942	25.1134	-0.914986	0.54158	-1.68947	0.0911288	0.736738	31.5505	-0.284301	0.614738	-0.462475	0.643741	0.976787	28.169	-0.533641	0.353346	-1.51025	0.13098	0.532976
ENSSSCG00000004473	PHIP	3831.51	-0.228611	0.0797184	-2.86773	0.00413434	0.0412861	3266.75	-0.23067	0.184272	-1.25179	0.210645	0.914584	4016.13	-0.243175	0.210961	-1.1527	0.249032	0.880565	3622.39	-0.237155	0.119944	-1.97721	0.0480178	0.350371
ENSSSCG00000004478	MYO6	149.322	-0.178235	0.224878	-0.792586	0.428019	0.672984	96.6397	-0.908426	0.424992	-2.13751	0.0325562	0.509493	126.072	-0.104537	0.328075	-0.318638	0.750001	0.983907	110.62	-0.457116	0.256375	-1.783	0.0745868	0.429025
ENSSSCG00000004479	FILIP1	33.6313	0.0915671	0.464609	0.197084	0.843762	0.926718	30.0518	-0.0786375	0.577187	-0.136243	0.891629	0.998795	44.9376	-0.529192	0.808085	-0.654872	0.51255	0.958922	37.1228	-0.347595	0.479227	-0.725324	0.468254	0.820044
ENSSSCG00000004480	COX7A2	3217.76	-0.2212	0.112874	-1.95971	0.0500294	0.205235	3222.69	-0.541687	0.194585	-2.78382	0.00537236	0.206002	3025.03	-0.0864378	0.235142	-0.367598	0.713173	0.982338	3127.82	-0.329315	0.154944	-2.12538	0.0335546	0.294534
ENSSSCG00000004485	CD109	83.136	-0.881017	0.290644	-3.03126	0.00243532	0.0285716	63.5345	-0.876794	0.38857	-2.25646	0.0240416	0.445496	109.595	-1.42785	0.63078	-2.26363	0.0235972	0.485994	85.3818	-1.14278	0.397063	-2.87808	0.00400107	0.0906259
ENSSSCG00000004486	SLC17A5	389.163	-0.146749	0.0985397	-1.48924	0.136424	0.368931	310.154	0.010914	0.225207	0.0484624	0.961348	0.998818	382.399	-0.353981	0.279259	-1.26757	0.204951	0.848264	344.423	-0.183627	0.160647	-1.14305	0.253019	0.671124
ENSSSCG00000004487	MTO1	236.529	0.130985	0.128604	1.01851	0.308435	0.573234	219.064	0.356665	0.262164	1.36046	0.173683	0.880821	256.835	0.0650078	0.262843	0.247326	0.804656	0.988618	236.98	0.201116	0.153606	1.3093	0.190433	0.612083
ENSSSCG00000004489	EEF1A1	381460	0.212835	0.0946978	2.24752	0.0246069	0.131857	395780	0.181167	0.178472	1.0151	0.310058	0.960992	403147	0.226383	0.192408	1.17657	0.239366	0.875654	399197	0.199204	0.113914	1.74872	0.0803392	0.440493
ENSSSCG00000004490	SETBP1	269.521	-0.2004	0.10194	-1.96586	0.0493153	0.203623	228.213	-0.241367	0.247347	-0.975824	0.329152	0.967942	209.774	-0.26438	0.263572	-1.00307	0.315829	0.911283	219.358	-0.232661	0.256109	-0.908447	0.363642	0.757999
ENSSSCG00000004491	SLC14A2	167.022	0.541127	0.256805	2.10715	0.0351043	0.164479	146.135	-0.168494	1.15535	-0.145838	0.884049	0.998795	190.927	0.50365	0.35497	1.41885	0.155942	0.809912	167.411	0.203942	0.515795	0.395394	0.692552	0.922554
ENSSSCG00000004492	SLC14A1	256.125	0.522545	0.15789	3.30955	0.000934464	0.0145877	244.416	0.38756	0.443805	0.873267	0.382518	0.976796	290.398	1.01039	0.530718	1.90382	0.0569336	0.642169	266.274	0.677173	0.367677	1.84176	0.0655104	0.405393
[truncated: 11,928 more rows]
