# Supplementary material for: Weaning Induces Stress-Dependent DNA Methylation and Transcriptional Changes in Piglet PBMCs
Source: Front Genet. 2021 Feb 5;12:633564. doi: 10.3389/fgene.2021.633564 (PMC7893110; doi:10.3389/fgene.2021.633564)
Supplement: Supplementary file 9 [file Table_7.XLSX]

## Sheet: TableS7A
Table S7A. GO Terms enriched among upregulated genes (post- vs. pre-weaning)
GO Term	Description	P-value	FDR q-value	Enrichment	No. Genes	Genes
GO:0002376	immune system process	3.36e-44	4.62e-40	2.65	203	[DHX58 - dexh (asp-glu-x-his) box polypeptide 58, DDX60 - dead (asp-glu-ala-asp) box polypeptide 60, UNC93B1 - unc-93 homolog b1 (c. elegans), EBI3 - epstein-barr virus induced 3, CLEC5A - c-type lectin domain family 5, member a, CD274 - cd274 molecule, TICAM1 - toll-like receptor adaptor molecule 1, BST2 - bone marrow stromal cell antigen 2, PML - promyelocytic leukemia, SPI1 - spleen focus form…
GO:0006952	defense response	4.76e-42	3.27e-38	3.78	126	[DHX58 - dexh (asp-glu-x-his) box polypeptide 58, IL18 - interleukin 18 (interferon-gamma-inducing factor), LGALS3BP - lectin, galactoside-binding, soluble, 3 binding protein, IL15 - interleukin 15, FN1 - fibronectin 1, DTX3L - deltex 3-like (drosophila), DDX60 - dead (asp-glu-ala-asp) box polypeptide 60, UNC93B1 - unc-93 homolog b1 (c. elegans), CLEC5A - c-type lectin domain family 5, member a, …
GO:0019221	cytokine-mediated signaling pathway	4.27e-33	1.96e-29	4	94	[TIMP1 - timp metallopeptidase inhibitor 1, IL18 - interleukin 18 (interferon-gamma-inducing factor), IL15 - interleukin 15, FN1 - fibronectin 1, OASL - 2'-5'-oligoadenylate synthetase-like, EBI3 - epstein-barr virus induced 3, IFI30 - interferon, gamma-inducible protein 30, IL23A - interleukin 23, alpha subunit p19, ACSL1 - acyl-coa synthetase long-chain family member 1, IFNAR1 - interferon (alp…
GO:0006955	immune response	2.67e-31	9.2e-28	3.47	105	[DHX58 - dexh (asp-glu-x-his) box polypeptide 58, IL18 - interleukin 18 (interferon-gamma-inducing factor), IL15 - interleukin 15, DTX3L - deltex 3-like (drosophila), UNC93B1 - unc-93 homolog b1 (c. elegans), DDX60 - dead (asp-glu-ala-asp) box polypeptide 60, EBI3 - epstein-barr virus induced 3, CD274 - cd274 molecule, CLEC5A - c-type lectin domain family 5, member a, TICAM1 - toll-like receptor …
GO:0043207	response to external biotic stimulus	8.56e-31	2.36e-27	3.63	98	[DHX58 - dexh (asp-glu-x-his) box polypeptide 58, DTX3L - deltex 3-like (drosophila), UNC93B1 - unc-93 homolog b1 (c. elegans), DDX60 - dead (asp-glu-ala-asp) box polypeptide 60, ABCA1 - atp-binding cassette, sub-family a (abc1), member 1, TICAM1 - toll-like receptor adaptor molecule 1, CD274 - cd274 molecule, BST2 - bone marrow stromal cell antigen 2, TMEM173 - transmembrane protein 173, IDO1 - …
GO:0009607	response to biotic stimulus	1.45e-30	3.33e-27	3.54	100	[DHX58 - dexh (asp-glu-x-his) box polypeptide 58, DTX3L - deltex 3-like (drosophila), UNC93B1 - unc-93 homolog b1 (c. elegans), DDX60 - dead (asp-glu-ala-asp) box polypeptide 60, ABCA1 - atp-binding cassette, sub-family a (abc1), member 1, CD274 - cd274 molecule, TICAM1 - toll-like receptor adaptor molecule 1, BST2 - bone marrow stromal cell antigen 2, TMEM173 - transmembrane protein 173, IDO1 - …
GO:0002252	immune effector process	2.28e-29	4.49e-26	3.14	112	[DHX58 - dexh (asp-glu-x-his) box polypeptide 58, IL18 - interleukin 18 (interferon-gamma-inducing factor), DTX3L - deltex 3-like (drosophila), DDX60 - dead (asp-glu-ala-asp) box polypeptide 60, UNC93B1 - unc-93 homolog b1 (c. elegans), PSAP - prosaposin, CLEC5A - c-type lectin domain family 5, member a, TICAM1 - toll-like receptor adaptor molecule 1, BST2 - bone marrow stromal cell antigen 2, TM…
GO:0009605	response to external stimulus	6.76e-26	1.16e-22	2.65	126	[DHX58 - dexh (asp-glu-x-his) box polypeptide 58, IL15 - interleukin 15, DTX3L - deltex 3-like (drosophila), DDX60 - dead (asp-glu-ala-asp) box polypeptide 60, UNC93B1 - unc-93 homolog b1 (c. elegans), ABCA1 - atp-binding cassette, sub-family a (abc1), member 1, CD274 - cd274 molecule, TICAM1 - toll-like receptor adaptor molecule 1, TMEM173 - transmembrane protein 173, BST2 - bone marrow stromal …
GO:0006954	inflammatory response	1.08e-24	1.66e-21	4.41	63	[IL18 - interleukin 18 (interferon-gamma-inducing factor), IL15 - interleukin 15, FN1 - fibronectin 1, TICAM1 - toll-like receptor adaptor molecule 1, IL23A - interleukin 23, alpha subunit p19, SLC11A1 - solute carrier family 11 (proton-coupled divalent metal ion transporter), member 1, PRCP - prolylcarboxypeptidase (angiotensinase c), TLR2 - toll-like receptor 2, LY86 - lymphocyte antigen 86, TO…
GO:0050896	response to stimulus	5.14e-24	7.07e-21	1.65	283	[DHX58 - dexh (asp-glu-x-his) box polypeptide 58, LGALS3BP - lectin, galactoside-binding, soluble, 3 binding protein, UNC93B1 - unc-93 homolog b1 (c. elegans), DDX60 - dead (asp-glu-ala-asp) box polypeptide 60, PDIA4 - protein disulfide isomerase family a, member 4, EBI3 - epstein-barr virus induced 3, ABCA1 - atp-binding cassette, sub-family a (abc1), member 1, TICAM1 - toll-like receptor adapto…
GO:0051707	response to other organism	1.97e-22	2.47e-19	3.73	69	[DHX58 - dexh (asp-glu-x-his) box polypeptide 58, OASL - 2'-5'-oligoadenylate synthetase-like, DTX3L - deltex 3-like (drosophila), UNC93B1 - unc-93 homolog b1 (c. elegans), DDX60 - dead (asp-glu-ala-asp) box polypeptide 60, TICAM1 - toll-like receptor adaptor molecule 1, IL23A - interleukin 23, alpha subunit p19, SLC11A1 - solute carrier family 11 (proton-coupled divalent metal ion transporter), …
GO:0001817	regulation of cytokine production	3.66e-22	4.2e-19	3.14	85	[IL18 - interleukin 18 (interferon-gamma-inducing factor), DHX58 - dexh (asp-glu-x-his) box polypeptide 58, IL15 - interleukin 15, FN1 - fibronectin 1, DDX60 - dead (asp-glu-ala-asp) box polypeptide 60, SRGN - serglycin, EBI3 - epstein-barr virus induced 3, CLEC5A - c-type lectin domain family 5, member a, CD274 - cd274 molecule, TICAM1 - toll-like receptor adaptor molecule 1, IL23A - interleukin…
GO:0098542	defense response to other organism	6.57e-22	6.95e-19	4.54	54	[DHX58 - dexh (asp-glu-x-his) box polypeptide 58, OASL - 2'-5'-oligoadenylate synthetase-like, DTX3L - deltex 3-like (drosophila), UNC93B1 - unc-93 homolog b1 (c. elegans), DDX60 - dead (asp-glu-ala-asp) box polypeptide 60, TICAM1 - toll-like receptor adaptor molecule 1, IL23A - interleukin 23, alpha subunit p19, SLC11A1 - solute carrier family 11 (proton-coupled divalent metal ion transporter), …
GO:0031347	regulation of defense response	1.8e-21	1.77e-18	3.02	87	[NAPEPLD - n-acyl phosphatidylethanolamine phospholipase d, IL18 - interleukin 18 (interferon-gamma-inducing factor), DHX58 - dexh (asp-glu-x-his) box polypeptide 58, IL15 - interleukin 15, LGMN - legumain, DTX3L - deltex 3-like (drosophila), DDX60 - dead (asp-glu-ala-asp) box polypeptide 60, UNC93B1 - unc-93 homolog b1 (c. elegans), TICAM1 - toll-like receptor adaptor molecule 1, VPS35 - vacuola…
GO:0007165	signal transduction	3.98e-21	3.65e-18	1.7	242	[LGALS3BP - lectin, galactoside-binding, soluble, 3 binding protein, BMX - bmx non-receptor tyrosine kinase, UNC93B1 - unc-93 homolog b1 (c. elegans), EBI3 - epstein-barr virus induced 3, ABCA1 - atp-binding cassette, sub-family a (abc1), member 1, TICAM1 - toll-like receptor adaptor molecule 1, CD274 - cd274 molecule, CLEC5A - c-type lectin domain family 5, member a, PDIA5 - protein disulfide is…
GO:0050776	regulation of immune response	5.82e-21	5e-18	2.7	100	[DHX58 - dexh (asp-glu-x-his) box polypeptide 58, IL18 - interleukin 18 (interferon-gamma-inducing factor), IL15 - interleukin 15, LGMN - legumain, UNC93B1 - unc-93 homolog b1 (c. elegans), DDX60 - dead (asp-glu-ala-asp) box polypeptide 60, TICAM1 - toll-like receptor adaptor molecule 1, CD274 - cd274 molecule, RBCK1 - ranbp-type and c3hc4-type zinc finger containing 1, BST2 - bone marrow stromal…
GO:0001819	positive regulation of cytokine production	9.37e-21	7.59e-18	3.77	63	[DHX58 - dexh (asp-glu-x-his) box polypeptide 58, IL18 - interleukin 18 (interferon-gamma-inducing factor), IL15 - interleukin 15, DDX60 - dead (asp-glu-ala-asp) box polypeptide 60, EBI3 - epstein-barr virus induced 3, TICAM1 - toll-like receptor adaptor molecule 1, CD274 - cd274 molecule, CLEC5A - c-type lectin domain family 5, member a, IL23A - interleukin 23, alpha subunit p19, SLC11A1 - solut…
GO:0006950	response to stress	1.43e-20	1.09e-17	1.83	200	[DHX58 - dexh (asp-glu-x-his) box polypeptide 58, LGALS3BP - lectin, galactoside-binding, soluble, 3 binding protein, DDX60 - dead (asp-glu-ala-asp) box polypeptide 60, UNC93B1 - unc-93 homolog b1 (c. elegans), PDIA4 - protein disulfide isomerase family a, member 4, ABCA1 - atp-binding cassette, sub-family a (abc1), member 1, CLEC5A - c-type lectin domain family 5, member a, TICAM1 - toll-like re…
GO:0045087	innate immune response	3.24e-20	2.35e-17	4.01	57	[DHX58 - dexh (asp-glu-x-his) box polypeptide 58, IL18 - interleukin 18 (interferon-gamma-inducing factor), DTX3L - deltex 3-like (drosophila), UNC93B1 - unc-93 homolog b1 (c. elegans), DDX60 - dead (asp-glu-ala-asp) box polypeptide 60, TICAM1 - toll-like receptor adaptor molecule 1, CLEC5A - c-type lectin domain family 5, member a, TMEM106A - transmembrane protein 106a, IL23A - interleukin 23, a…
GO:0002684	positive regulation of immune system process	3.54e-20	2.43e-17	2.65	99	[DHX58 - dexh (asp-glu-x-his) box polypeptide 58, IL18 - interleukin 18 (interferon-gamma-inducing factor), IL15 - interleukin 15, LGMN - legumain, UNC93B1 - unc-93 homolog b1 (c. elegans), DDX60 - dead (asp-glu-ala-asp) box polypeptide 60, EBI3 - epstein-barr virus induced 3, TICAM1 - toll-like receptor adaptor molecule 1, CD274 - cd274 molecule, RBCK1 - ranbp-type and c3hc4-type zinc finger con…
GO:0051704	multi-organism process	5.58e-20	3.66e-17	2.35	120	[DHX58 - dexh (asp-glu-x-his) box polypeptide 58, FN1 - fibronectin 1, DTX3L - deltex 3-like (drosophila), DDX60 - dead (asp-glu-ala-asp) box polypeptide 60, UNC93B1 - unc-93 homolog b1 (c. elegans), FCHSD2 - fch and double sh3 domains 2, RBCK1 - ranbp-type and c3hc4-type zinc finger containing 1, CLEC5A - c-type lectin domain family 5, member a, TICAM1 - toll-like receptor adaptor molecule 1, TM…
GO:0002682	regulation of immune system process	5.97e-20	3.74e-17	2.26	128	[IL18 - interleukin 18 (interferon-gamma-inducing factor), DHX58 - dexh (asp-glu-x-his) box polypeptide 58, LGMN - legumain, IL15 - interleukin 15, DTX3L - deltex 3-like (drosophila), UNC93B1 - unc-93 homolog b1 (c. elegans), DDX60 - dead (asp-glu-ala-asp) box polypeptide 60, EBI3 - epstein-barr virus induced 3, CD274 - cd274 molecule, TICAM1 - toll-like receptor adaptor molecule 1, RBCK1 - ranbp…
GO:0051607	defense response to virus	9.64e-20	5.77e-17	5.49	40	[DHX58 - dexh (asp-glu-x-his) box polypeptide 58, OASL - 2'-5'-oligoadenylate synthetase-like, DTX3L - deltex 3-like (drosophila), STAT2 - signal transducer and activator of transcription 2, 113kda, DDX60 - dead (asp-glu-ala-asp) box polypeptide 60, UNC93B1 - unc-93 homolog b1 (c. elegans), ISG20 - interferon stimulated exonuclease gene 20kda, STAT1 - signal transducer and activator of transcript…
GO:0048584	positive regulation of response to stimulus	1.13e-18	6.21e-16	1.97	157	[DHX58 - dexh (asp-glu-x-his) box polypeptide 58, IL18 - interleukin 18 (interferon-gamma-inducing factor), IL15 - interleukin 15, LGMN - legumain, DTX3L - deltex 3-like (drosophila), UNC93B1 - unc-93 homolog b1 (c. elegans), DDX60 - dead (asp-glu-ala-asp) box polypeptide 60, PSAP - prosaposin, TICAM1 - toll-like receptor adaptor molecule 1, CD274 - cd274 molecule, RBCK1 - ranbp-type and c3hc4-ty…
GO:0007166	cell surface receptor signaling pathway	1.09e-18	6.24e-16	2.03	148	[IL18 - interleukin 18 (interferon-gamma-inducing factor), IL15 - interleukin 15, FN1 - fibronectin 1, DTX3L - deltex 3-like (drosophila), EBI3 - epstein-barr virus induced 3, ABCA1 - atp-binding cassette, sub-family a (abc1), member 1, TICAM1 - toll-like receptor adaptor molecule 1, CD274 - cd274 molecule, RBCK1 - ranbp-type and c3hc4-type zinc finger containing 1, NRP1 - neuropilin 1, BST2 - bo…
GO:0045321	leukocyte activation	1.4e-18	7.4e-16	2.64	92	[IL18 - interleukin 18 (interferon-gamma-inducing factor), CSTB - cystatin b (stefin b), IL15 - interleukin 15, RPL22 - ribosomal protein l22, OSTF1 - osteoclast stimulating factor 1, PSAP - prosaposin, GNS - glucosamine (n-acetyl)-6-sulfatase, EBI3 - epstein-barr virus induced 3, CLEC5A - c-type lectin domain family 5, member a, TICAM1 - toll-like receptor adaptor molecule 1, SEMA4A - sema domai…
GO:0002274	myeloid leukocyte activation	3.11e-18	1.59e-15	3.1	71	[IL18 - interleukin 18 (interferon-gamma-inducing factor), CSTB - cystatin b (stefin b), IL15 - interleukin 15, OSTF1 - osteoclast stimulating factor 1, PSAP - prosaposin, GNS - glucosamine (n-acetyl)-6-sulfatase, CLEC5A - c-type lectin domain family 5, member a, TICAM1 - toll-like receptor adaptor molecule 1, TMEM106A - transmembrane protein 106a, SLC11A1 - solute carrier family 11 (proton-coupl…
GO:0001775	cell activation	3.26e-18	1.6e-15	2.51	98	[IL18 - interleukin 18 (interferon-gamma-inducing factor), IL15 - interleukin 15, PSAP - prosaposin, EBI3 - epstein-barr virus induced 3, TICAM1 - toll-like receptor adaptor molecule 1, CLEC5A - c-type lectin domain family 5, member a, TMEM106A - transmembrane protein 106a, BST2 - bone marrow stromal cell antigen 2, TMEM173 - transmembrane protein 173, SPI1 - spleen focus forming virus (sffv) pro…
GO:0009615	response to virus	4.65e-18	2.21e-15	4.28	47	[DHX58 - dexh (asp-glu-x-his) box polypeptide 58, DTX3L - deltex 3-like (drosophila), OASL - 2'-5'-oligoadenylate synthetase-like, ISG20 - interferon stimulated exonuclease gene 20kda, DDX60 - dead (asp-glu-ala-asp) box polypeptide 60, UNC93B1 - unc-93 homolog b1 (c. elegans), STAT2 - signal transducer and activator of transcription 2, 113kda, STAT1 - signal transducer and activator of transcript…
GO:0032101	regulation of response to external stimulus	5.07e-18	2.32e-15	2.83	80	[ZSWIM4 - zinc finger, swim-type containing 4, NAPEPLD - n-acyl phosphatidylethanolamine phospholipase d, IL18 - interleukin 18 (interferon-gamma-inducing factor), DHX58 - dexh (asp-glu-x-his) box polypeptide 58, IL15 - interleukin 15, LGMN - legumain, CAPN3 - calpain 3, (p94), DTX3L - deltex 3-like (drosophila), DDX60 - dead (asp-glu-ala-asp) box polypeptide 60, TICAM1 - toll-like receptor adapt…
GO:0050778	positive regulation of immune response	6.43e-18	2.85e-15	2.92	76	[DHX58 - dexh (asp-glu-x-his) box polypeptide 58, IL18 - interleukin 18 (interferon-gamma-inducing factor), LGMN - legumain, IL15 - interleukin 15, DDX60 - dead (asp-glu-ala-asp) box polypeptide 60, UNC93B1 - unc-93 homolog b1 (c. elegans), RBCK1 - ranbp-type and c3hc4-type zinc finger containing 1, TICAM1 - toll-like receptor adaptor molecule 1, CD274 - cd274 molecule, HLX - h2.0-like homeobox, …
GO:0005576	extracellular region	3.61e-17	3.28e-14	2.47	95	[TIMP1 - timp metallopeptidase inhibitor 1, IL18 - interleukin 18 (interferon-gamma-inducing factor), CSTB - cystatin b (stefin b), IL15 - interleukin 15, LGMN - legumain, LGALS3BP - lectin, galactoside-binding, soluble, 3 binding protein, FN1 - fibronectin 1, OSTF1 - osteoclast stimulating factor 1, PSAP - prosaposin, EGFL7 - egf-like-domain, multiple 7, SRGN - serglycin, GNS - glucosamine (n-ac…
GO:0044433	cytoplasmic vesicle part	2.15e-17	3.91e-14	2.18	121	[LGMN - legumain, LGALS3BP - lectin, galactoside-binding, soluble, 3 binding protein, FN1 - fibronectin 1, DTX3L - deltex 3-like (drosophila), PSAP - prosaposin, CLEC5A - c-type lectin domain family 5, member a, CD274 - cd274 molecule, TICAM1 - toll-like receptor adaptor molecule 1, TMEM173 - transmembrane protein 173, BST2 - bone marrow stromal cell antigen 2, LDLR - low density lipoprotein rece…
GO:0031349	positive regulation of defense response	1.17e-16	5.05e-14	3.4	57	[DHX58 - dexh (asp-glu-x-his) box polypeptide 58, IL18 - interleukin 18 (interferon-gamma-inducing factor), NAPEPLD - n-acyl phosphatidylethanolamine phospholipase d, IL15 - interleukin 15, LGMN - legumain, UNC93B1 - unc-93 homolog b1 (c. elegans), DDX60 - dead (asp-glu-ala-asp) box polypeptide 60, TICAM1 - toll-like receptor adaptor molecule 1, IL23A - interleukin 23, alpha subunit p19, LDLR - l…
GO:0042119	neutrophil activation	2.98e-16	1.24e-13	3.13	62	[CSTB - cystatin b (stefin b), IL18 - interleukin 18 (interferon-gamma-inducing factor), IL15 - interleukin 15, OSTF1 - osteoclast stimulating factor 1, PSAP - prosaposin, GNS - glucosamine (n-acetyl)-6-sulfatase, CLEC5A - c-type lectin domain family 5, member a, SLC11A1 - solute carrier family 11 (proton-coupled divalent metal ion transporter), member 1, BST2 - bone marrow stromal cell antigen 2…
GO:0036230	granulocyte activation	3.96e-16	1.6e-13	3.11	62	[CSTB - cystatin b (stefin b), IL18 - interleukin 18 (interferon-gamma-inducing factor), IL15 - interleukin 15, OSTF1 - osteoclast stimulating factor 1, PSAP - prosaposin, GNS - glucosamine (n-acetyl)-6-sulfatase, CLEC5A - c-type lectin domain family 5, member a, SLC11A1 - solute carrier family 11 (proton-coupled divalent metal ion transporter), member 1, BST2 - bone marrow stromal cell antigen 2…
GO:0045088	regulation of innate immune response	4.86e-16	1.91e-13	3.3	57	[DHX58 - dexh (asp-glu-x-his) box polypeptide 58, LGMN - legumain, DDX60 - dead (asp-glu-ala-asp) box polypeptide 60, UNC93B1 - unc-93 homolog b1 (c. elegans), TICAM1 - toll-like receptor adaptor molecule 1, TMEM173 - transmembrane protein 173, TLR2 - toll-like receptor 2, TLR8 - toll-like receptor 8, NMI - n-myc (and stat) interactor, TLR4 - toll-like receptor 4, IFNGR2 - interferon gamma recept…
GO:0048583	regulation of response to stimulus	7.18e-16	2.74e-13	1.58	230	[DHX58 - dexh (asp-glu-x-his) box polypeptide 58, UNC93B1 - unc-93 homolog b1 (c. elegans), DDX60 - dead (asp-glu-ala-asp) box polypeptide 60, ABCA1 - atp-binding cassette, sub-family a (abc1), member 1, CD274 - cd274 molecule, TICAM1 - toll-like receptor adaptor molecule 1, NRP1 - neuropilin 1, BST2 - bone marrow stromal cell antigen 2, LDLR - low density lipoprotein receptor, PML - promyelocyti…
GO:0080134	regulation of response to stress	9.29e-16	3.45e-13	2.07	121	[IL18 - interleukin 18 (interferon-gamma-inducing factor), DHX58 - dexh (asp-glu-x-his) box polypeptide 58, LGMN - legumain, IL15 - interleukin 15, DTX3L - deltex 3-like (drosophila), UNC93B1 - unc-93 homolog b1 (c. elegans), DDX60 - dead (asp-glu-ala-asp) box polypeptide 60, PSAP - prosaposin, TICAM1 - toll-like receptor adaptor molecule 1, TMEM173 - transmembrane protein 173, LDLR - low density…
GO:0043299	leukocyte degranulation	1.17e-15	4.23e-13	3.08	61	[CSTB - cystatin b (stefin b), OSTF1 - osteoclast stimulating factor 1, PSAP - prosaposin, GNS - glucosamine (n-acetyl)-6-sulfatase, CLEC5A - c-type lectin domain family 5, member a, SLC11A1 - solute carrier family 11 (proton-coupled divalent metal ion transporter), member 1, BST2 - bone marrow stromal cell antigen 2, TMEM173 - transmembrane protein 173, PRCP - prolylcarboxypeptidase (angiotensin…
GO:0043312	neutrophil degranulation	4.34e-15	1.49e-12	3.07	59	[CSTB - cystatin b (stefin b), OSTF1 - osteoclast stimulating factor 1, PSAP - prosaposin, GNS - glucosamine (n-acetyl)-6-sulfatase, CLEC5A - c-type lectin domain family 5, member a, SLC11A1 - solute carrier family 11 (proton-coupled divalent metal ion transporter), member 1, BST2 - bone marrow stromal cell antigen 2, TMEM173 - transmembrane protein 173, PRCP - prolylcarboxypeptidase (angiotensin…
GO:0002366	leukocyte activation involved in immune response	4.29e-15	1.51e-12	2.82	67	[CSTB - cystatin b (stefin b), OSTF1 - osteoclast stimulating factor 1, PSAP - prosaposin, GNS - glucosamine (n-acetyl)-6-sulfatase, CLEC5A - c-type lectin domain family 5, member a, TICAM1 - toll-like receptor adaptor molecule 1, SEMA4A - sema domain, immunoglobulin domain (ig), transmembrane domain (tm) and short cytoplasmic domain, (semaphorin) 4a, SLC11A1 - solute carrier family 11 (proton-co…
GO:0002275	myeloid cell activation involved in immune response	4.58e-15	1.54e-12	3	61	[CSTB - cystatin b (stefin b), OSTF1 - osteoclast stimulating factor 1, PSAP - prosaposin, GNS - glucosamine (n-acetyl)-6-sulfatase, CLEC5A - c-type lectin domain family 5, member a, TICAM1 - toll-like receptor adaptor molecule 1, SLC11A1 - solute carrier family 11 (proton-coupled divalent metal ion transporter), member 1, BST2 - bone marrow stromal cell antigen 2, TMEM173 - transmembrane protein…
GO:0002263	cell activation involved in immune response	5.47e-15	1.79e-12	2.8	67	[CSTB - cystatin b (stefin b), OSTF1 - osteoclast stimulating factor 1, PSAP - prosaposin, GNS - glucosamine (n-acetyl)-6-sulfatase, CLEC5A - c-type lectin domain family 5, member a, TICAM1 - toll-like receptor adaptor molecule 1, SEMA4A - sema domain, immunoglobulin domain (ig), transmembrane domain (tm) and short cytoplasmic domain, (semaphorin) 4a, SLC11A1 - solute carrier family 11 (proton-co…
GO:0002283	neutrophil activation involved in immune response	5.72e-15	1.79e-12	3.05	59	[CSTB - cystatin b (stefin b), OSTF1 - osteoclast stimulating factor 1, PSAP - prosaposin, GNS - glucosamine (n-acetyl)-6-sulfatase, CLEC5A - c-type lectin domain family 5, member a, SLC11A1 - solute carrier family 11 (proton-coupled divalent metal ion transporter), member 1, BST2 - bone marrow stromal cell antigen 2, TMEM173 - transmembrane protein 173, PRCP - prolylcarboxypeptidase (angiotensin…
GO:0045089	positive regulation of innate immune response	5.65e-15	1.81e-12	3.68	46	[FFAR2 - free fatty acid receptor 2, PSME1 - proteasome (prosome, macropain) activator subunit 1 (pa28 alpha), FLOT1 - flotillin 1, DHX58 - dexh (asp-glu-x-his) box polypeptide 58, LGMN - legumain, PSME2 - proteasome (prosome, macropain) activator subunit 2 (pa28 beta), MYD88 - myeloid differentiation primary response 88, DDX60 - dead (asp-glu-ala-asp) box polypeptide 60, UNC93B1 - unc-93 homolog…
GO:0010033	response to organic substance	1.29e-14	3.95e-12	1.86	143	[IL18 - interleukin 18 (interferon-gamma-inducing factor), IL15 - interleukin 15, LGMN - legumain, PSAP - prosaposin, ABCA1 - atp-binding cassette, sub-family a (abc1), member 1, TICAM1 - toll-like receptor adaptor molecule 1, CD274 - cd274 molecule, NRP1 - neuropilin 1, BST2 - bone marrow stromal cell antigen 2, TMEM173 - transmembrane protein 173, LDLR - low density lipoprotein receptor, IDO1 -…
GO:0060337	type I interferon signaling pathway	2.1e-14	6.29e-12	8.79	19	[RSAD2 - radical s-adenosyl methionine domain containing 2, IFITM3 - interferon induced transmembrane protein 3, OASL - 2'-5'-oligoadenylate synthetase-like, MYD88 - myeloid differentiation primary response 88, STAT2 - signal transducer and activator of transcription 2, 113kda, ISG20 - interferon stimulated exonuclease gene 20kda, STAT1 - signal transducer and activator of transcription 1, 91kda,…
GO:0034097	response to cytokine	2.69e-14	7.89e-12	2.83	63	[TIMP1 - timp metallopeptidase inhibitor 1, CD274 - cd274 molecule, SLC11A1 - solute carrier family 11 (proton-coupled divalent metal ion transporter), member 1, IFNAR1 - interferon (alpha, beta and omega) receptor 1, BST2 - bone marrow stromal cell antigen 2, TMEM173 - transmembrane protein 173, PML - promyelocytic leukemia, TLR2 - toll-like receptor 2, TLR4 - toll-like receptor 4, LDLRAP1 - low…
GO:0045055	regulated exocytosis	3.76e-14	1.08e-11	2.67	68	[TIMP1 - timp metallopeptidase inhibitor 1, CSTB - cystatin b (stefin b), LGALS3BP - lectin, galactoside-binding, soluble, 3 binding protein, FN1 - fibronectin 1, OSTF1 - osteoclast stimulating factor 1, PSAP - prosaposin, SRGN - serglycin, GNS - glucosamine (n-acetyl)-6-sulfatase, CLEC5A - c-type lectin domain family 5, member a, SLC11A1 - solute carrier family 11 (proton-coupled divalent metal …
GO:0044421	extracellular region part	2.88e-14	1.75e-11	1.73	167	[IL18 - interleukin 18 (interferon-gamma-inducing factor), LGALS3BP - lectin, galactoside-binding, soluble, 3 binding protein, IL15 - interleukin 15, LGMN - legumain, FN1 - fibronectin 1, AAMP - angio-associated, migratory cell protein, PDIA4 - protein disulfide isomerase family a, member 4, PSAP - prosaposin, EBI3 - epstein-barr virus induced 3, CD274 - cd274 molecule, NRP1 - neuropilin 1, LDLR …
GO:0046903	secretion	7.15e-14	2.01e-11	2.3	87	[TIMP1 - timp metallopeptidase inhibitor 1, CSTB - cystatin b (stefin b), LGALS3BP - lectin, galactoside-binding, soluble, 3 binding protein, FN1 - fibronectin 1, OSTF1 - osteoclast stimulating factor 1, PSAP - prosaposin, PDIA4 - protein disulfide isomerase family a, member 4, SRGN - serglycin, GNS - glucosamine (n-acetyl)-6-sulfatase, ABCA1 - atp-binding cassette, sub-family a (abc1), member 1,…
GO:0050727	regulation of inflammatory response	7.46e-14	2.05e-11	3.44	46	[FFAR2 - free fatty acid receptor 2, NAPEPLD - n-acyl phosphatidylethanolamine phospholipase d, IL18 - interleukin 18 (interferon-gamma-inducing factor), IL15 - interleukin 15, MYD88 - myeloid differentiation primary response 88, CLEC7A - c-type lectin domain family 7, member a, GPX1 - glutathione peroxidase 1, SPHK1 - sphingosine kinase 1, STAT5B - signal transducer and activator of transcriptio…
GO:0051239	regulation of multicellular organismal process	7.67e-14	2.07e-11	1.69	173	[IL18 - interleukin 18 (interferon-gamma-inducing factor), DHX58 - dexh (asp-glu-x-his) box polypeptide 58, IL15 - interleukin 15, LGMN - legumain, FN1 - fibronectin 1, AAMP - angio-associated, migratory cell protein, DDX60 - dead (asp-glu-ala-asp) box polypeptide 60, EBI3 - epstein-barr virus induced 3, ABCA1 - atp-binding cassette, sub-family a (abc1), member 1, TICAM1 - toll-like receptor adap…
GO:0006887	exocytosis	8.75e-14	2.32e-11	2.54	72	[TIMP1 - timp metallopeptidase inhibitor 1, CSTB - cystatin b (stefin b), LGALS3BP - lectin, galactoside-binding, soluble, 3 binding protein, FN1 - fibronectin 1, OSTF1 - osteoclast stimulating factor 1, PSAP - prosaposin, SRGN - serglycin, GNS - glucosamine (n-acetyl)-6-sulfatase, CLEC5A - c-type lectin domain family 5, member a, SLC11A1 - solute carrier family 11 (proton-coupled divalent metal …
GO:0005886	plasma membrane	7.14e-14	3.25e-11	1.63	191	[EMP1 - epithelial membrane protein 1, BMX - bmx non-receptor tyrosine kinase, AAMP - angio-associated, migratory cell protein, FCHSD2 - fch and double sh3 domains 2, PSAP - prosaposin, EBI3 - epstein-barr virus induced 3, ZNF174 - zinc finger protein 174, ABCA1 - atp-binding cassette, sub-family a (abc1), member 1, CD274 - cd274 molecule, CLEC5A - c-type lectin domain family 5, member a, TMEM106…
GO:0032103	positive regulation of response to external stimulus	1.48e-13	3.85e-11	3.7	41	[CCR4 - chemokine (c-c motif) receptor 4, CCR6 - chemokine (c-c motif) receptor 6, FFAR2 - free fatty acid receptor 2, NAPEPLD - n-acyl phosphatidylethanolamine phospholipase d, DHX58 - dexh (asp-glu-x-his) box polypeptide 58, IL18 - interleukin 18 (interferon-gamma-inducing factor), IL15 - interleukin 15, LGMN - legumain, CMKLR1 - chemokine-like receptor 1, MYD88 - myeloid differentiation primar…
GO:0032940	secretion by cell	1.93e-13	4.93e-11	2.33	82	[TIMP1 - timp metallopeptidase inhibitor 1, CSTB - cystatin b (stefin b), LGALS3BP - lectin, galactoside-binding, soluble, 3 binding protein, FN1 - fibronectin 1, OSTF1 - osteoclast stimulating factor 1, PSAP - prosaposin, PDIA4 - protein disulfide isomerase family a, member 4, SRGN - serglycin, GNS - glucosamine (n-acetyl)-6-sulfatase, ABCA1 - atp-binding cassette, sub-family a (abc1), member 1,…
GO:0044459	plasma membrane part	1.85e-13	5.62e-11	1.81	141	[FN1 - fibronectin 1, BMX - bmx non-receptor tyrosine kinase, EBI3 - epstein-barr virus induced 3, ABCA1 - atp-binding cassette, sub-family a (abc1), member 1, CD274 - cd274 molecule, CLEC5A - c-type lectin domain family 5, member a, CD69 - cd69 molecule, NRP1 - neuropilin 1, BST2 - bone marrow stromal cell antigen 2, LDLR - low density lipoprotein receptor, TOLLIP - toll interacting protein, TLR…
GO:0031982	vesicle	1.66e-13	6.05e-11	1.65	179	[LGALS3BP - lectin, galactoside-binding, soluble, 3 binding protein, IL15 - interleukin 15, LGMN - legumain, FN1 - fibronectin 1, DTX3L - deltex 3-like (drosophila), UNC93B1 - unc-93 homolog b1 (c. elegans), FCHSD2 - fch and double sh3 domains 2, PDIA4 - protein disulfide isomerase family a, member 4, PSAP - prosaposin, ABCA1 - atp-binding cassette, sub-family a (abc1), member 1, CD274 - cd274 mo…
GO:0032496	response to lipopolysaccharide	2.84e-13	7.11e-11	3.7	40	[ICAM1 - intercellular adhesion molecule 1, MYD88 - myeloid differentiation primary response 88, JUNB - jun b proto-oncogene, ADAM17 - adam metallopeptidase domain 17, ABCA1 - atp-binding cassette, sub-family a (abc1), member 1, TICAM1 - toll-like receptor adaptor molecule 1, CD274 - cd274 molecule, SLC11A1 - solute carrier family 11 (proton-coupled divalent metal ion transporter), member 1, IFNA…
GO:0060333	interferon-gamma-mediated signaling pathway	3.64e-13	8.79e-11	7.77	19	[ICAM1 - intercellular adhesion molecule 1, HCK - hemopoietic cell kinase, OASL - 2'-5'-oligoadenylate synthetase-like, STAT1 - signal transducer and activator of transcription 1, 91kda, TRIM21 - tripartite motif containing 21, IFI30 - interferon, gamma-inducible protein 30, B2M - beta-2-microglobulin, IRF2 - interferon regulatory factor 2, IRF3 - interferon regulatory factor 3, FCGR1A - fc fragm…
GO:0002237	response to molecule of bacterial origin	3.62e-13	8.89e-11	3.6	41	[ICAM1 - intercellular adhesion molecule 1, MYD88 - myeloid differentiation primary response 88, JUNB - jun b proto-oncogene, ADAM17 - adam metallopeptidase domain 17, ABCA1 - atp-binding cassette, sub-family a (abc1), member 1, CD274 - cd274 molecule, TICAM1 - toll-like receptor adaptor molecule 1, SLC11A1 - solute carrier family 11 (proton-coupled divalent metal ion transporter), member 1, IFNA…
GO:0051240	positive regulation of multicellular organismal process	3.75e-13	8.9e-11	1.96	114	[IL18 - interleukin 18 (interferon-gamma-inducing factor), DHX58 - dexh (asp-glu-x-his) box polypeptide 58, LGMN - legumain, IL15 - interleukin 15, FN1 - fibronectin 1, AAMP - angio-associated, migratory cell protein, DDX60 - dead (asp-glu-ala-asp) box polypeptide 60, EBI3 - epstein-barr virus induced 3, ABCA1 - atp-binding cassette, sub-family a (abc1), member 1, CLEC5A - c-type lectin domain fa…
GO:0042221	response to chemical	4.71e-13	1.1e-10	1.7	161	[IL18 - interleukin 18 (interferon-gamma-inducing factor), IL15 - interleukin 15, LGMN - legumain, PSAP - prosaposin, ABCA1 - atp-binding cassette, sub-family a (abc1), member 1, CD274 - cd274 molecule, TICAM1 - toll-like receptor adaptor molecule 1, CD69 - cd69 molecule, NRP1 - neuropilin 1, LDLR - low density lipoprotein receptor, TMEM173 - transmembrane protein 173, BST2 - bone marrow stromal …
GO:0016192	vesicle-mediated transport	8.98e-13	2.06e-10	1.89	121	[LGALS3BP - lectin, galactoside-binding, soluble, 3 binding protein, FN1 - fibronectin 1, DTX3L - deltex 3-like (drosophila), FCHSD2 - fch and double sh3 domains 2, PSAP - prosaposin, ABCA1 - atp-binding cassette, sub-family a (abc1), member 1, CLEC5A - c-type lectin domain family 5, member a, TMEM173 - transmembrane protein 173, BST2 - bone marrow stromal cell antigen 2, LDLR - low density lipop…
GO:0002221	pattern recognition receptor signaling pathway	1.27e-12	2.86e-10	5.19	26	[FFAR2 - free fatty acid receptor 2, LGMN - legumain, MYD88 - myeloid differentiation primary response 88, UNC93B1 - unc-93 homolog b1 (c. elegans), CLEC7A - c-type lectin domain family 7, member a, TICAM1 - toll-like receptor adaptor molecule 1, TMEM173 - transmembrane protein 173, CD14 - cd14 molecule, TLR2 - toll-like receptor 2, SCIMP - slp adaptor and csk interacting membrane protein, TLR8 -…
GO:0001818	negative regulation of cytokine production	2.66e-12	5.9e-10	3.53	39	[DHX58 - dexh (asp-glu-x-his) box polypeptide 58, FN1 - fibronectin 1, CMKLR1 - chemokine-like receptor 1, TYROBP - tyro protein tyrosine kinase binding protein, SRGN - serglycin, KLF2 - kruppel-like factor 2 (lung), CD274 - cd274 molecule, IL23A - interleukin 23, alpha subunit p19, TNFRSF4 - tumor necrosis factor receptor superfamily, member 4, SLC11A1 - solute carrier family 11 (proton-coupled …
GO:0044425	membrane part	2.68e-12	6.97e-10	1.42	259	[EMP1 - epithelial membrane protein 1, BMX - bmx non-receptor tyrosine kinase, UNC93B1 - unc-93 homolog b1 (c. elegans), EBI3 - epstein-barr virus induced 3, ABCA1 - atp-binding cassette, sub-family a (abc1), member 1, CLEC5A - c-type lectin domain family 5, member a, CD274 - cd274 molecule, PDIA5 - protein disulfide isomerase family a, member 5, NRP1 - neuropilin 1, BST2 - bone marrow stromal ce…
GO:0032675	regulation of interleukin-6 production	1.57e-11	3.44e-09	4.88	25	[MYD88 - myeloid differentiation primary response 88, TYROBP - tyro protein tyrosine kinase binding protein, CLEC7A - c-type lectin domain family 7, member a, KLF2 - kruppel-like factor 2 (lung), TICAM1 - toll-like receptor adaptor molecule 1, TLR2 - toll-like receptor 2, SCIMP - slp adaptor and csk interacting membrane protein, TLR8 - toll-like receptor 8, TLR4 - toll-like receptor 4, FOXP3 - fo…
GO:0044437	vacuolar part	2.22e-11	5.04e-09	2.58	57	[AP2A1 - adaptor-related protein complex 2, alpha 1 subunit, LGMN - legumain, DTX3L - deltex 3-like (drosophila), PSAP - prosaposin, GNS - glucosamine (n-acetyl)-6-sulfatase, IFI30 - interferon, gamma-inducible protein 30, VPS35 - vacuolar protein sorting 35 homolog (s. cerevisiae), LDLR - low density lipoprotein receptor, BST2 - bone marrow stromal cell antigen 2, TMEM173 - transmembrane protein…
GO:0002253	activation of immune response	2.4e-11	5.16e-09	2.79	50	[LGMN - legumain, UNC93B1 - unc-93 homolog b1 (c. elegans), RBCK1 - ranbp-type and c3hc4-type zinc finger containing 1, TICAM1 - toll-like receptor adaptor molecule 1, TMEM173 - transmembrane protein 173, CTLA4 - cytotoxic t-lymphocyte-associated protein 4, TLR2 - toll-like receptor 2, TLR8 - toll-like receptor 8, TLR4 - toll-like receptor 4, FOXP3 - forkhead box p3, TIFA - traf-interacting prote…
GO:0002758	innate immune response-activating signal transduction	2.64e-11	5.6e-09	3.74	33	[FFAR2 - free fatty acid receptor 2, PSME1 - proteasome (prosome, macropain) activator subunit 1 (pa28 alpha), LGMN - legumain, PSME2 - proteasome (prosome, macropain) activator subunit 2 (pa28 beta), MYD88 - myeloid differentiation primary response 88, UNC93B1 - unc-93 homolog b1 (c. elegans), CLEC7A - c-type lectin domain family 7, member a, TICAM1 - toll-like receptor adaptor molecule 1, TMEM1…
GO:0032642	regulation of chemokine production	4.38e-11	9.13e-09	6.59	18	[CSF1R - colony stimulating factor 1 receptor, FFAR2 - free fatty acid receptor 2, CLEC7A - c-type lectin domain family 7, member a, ADAM17 - adam metallopeptidase domain 17, AIF1 - allograft inflammatory factor 1, TICAM1 - toll-like receptor adaptor molecule 1, KLF4 - kruppel-like factor 4 (gut), ARG2 - arginase 2, TLR2 - toll-like receptor 2, HMOX1 - heme oxygenase (decycling) 1, TLR4 - toll-li…
GO:0042035	regulation of cytokine biosynthetic process	4.77e-11	9.8e-09	5.05	23	[TYROBP - tyro protein tyrosine kinase binding protein, MAPKAPK2 - mitogen-activated protein kinase-activated protein kinase 2, CLEC7A - c-type lectin domain family 7, member a, EBI3 - epstein-barr virus induced 3, NFKB1 - nuclear factor of kappa light polypeptide gene enhancer in b-cells 1, STAT5B - signal transducer and activator of transcription 5b, TICAM1 - toll-like receptor adaptor molecule…
GO:0033993	response to lipid	4.91e-11	9.94e-09	2.42	62	[IL15 - interleukin 15, ABCA1 - atp-binding cassette, sub-family a (abc1), member 1, CD274 - cd274 molecule, TICAM1 - toll-like receptor adaptor molecule 1, SLC11A1 - solute carrier family 11 (proton-coupled divalent metal ion transporter), member 1, ACSL1 - acyl-coa synthetase long-chain family member 1, IFNAR1 - interferon (alpha, beta and omega) receptor 1, LDLR - low density lipoprotein recep…
GO:0002218	activation of innate immune response	6.82e-11	1.36e-08	3.54	34	[FFAR2 - free fatty acid receptor 2, PSME1 - proteasome (prosome, macropain) activator subunit 1 (pa28 alpha), LGMN - legumain, PSME2 - proteasome (prosome, macropain) activator subunit 2 (pa28 beta), MYD88 - myeloid differentiation primary response 88, UNC93B1 - unc-93 homolog b1 (c. elegans), CLEC7A - c-type lectin domain family 7, member a, TICAM1 - toll-like receptor adaptor molecule 1, TMEM1…
GO:0005775	vacuolar lumen	8.81e-11	1.6e-08	4.24	27	[NEU1 - sialidase 1 (lysosomal sialidase), LGMN - legumain, PSAP - prosaposin, GNS - glucosamine (n-acetyl)-6-sulfatase, IFI30 - interferon, gamma-inducible protein 30, DNAJC3 - dnaj (hsp40) homolog, subfamily c, member 3, AGRN - agrin, TOLLIP - toll interacting protein, GRN - granulin, SMPD1 - sphingomyelin phosphodiesterase 1, acid lysosomal, CECR1 - cat eye syndrome chromosome region, candidat…
GO:0031226	intrinsic component of plasma membrane	8.6e-11	1.74e-08	2.14	77	[ABCA1 - atp-binding cassette, sub-family a (abc1), member 1, CLEC5A - c-type lectin domain family 5, member a, SLC16A3 - solute carrier family 16 (monocarboxylate transporter), member 3, SEMA4A - sema domain, immunoglobulin domain (ig), transmembrane domain (tm) and short cytoplasmic domain, (semaphorin) 4a, CD69 - cd69 molecule, SLC11A1 - solute carrier family 11 (proton-coupled divalent metal …
GO:0031224	intrinsic component of membrane	1.06e-10	1.75e-08	1.51	191	[EMP1 - epithelial membrane protein 1, SLC35A4 - solute carrier family 35, member a4, UNC93B1 - unc-93 homolog b1 (c. elegans), SDHD - succinate dehydrogenase complex, subunit d, integral membrane protein, INTS5 - integrator complex subunit 5, ABCA1 - atp-binding cassette, sub-family a (abc1), member 1, CD274 - cd274 molecule, CLEC5A - c-type lectin domain family 5, member a, CD69 - cd69 molecule…
GO:0032755	positive regulation of interleukin-6 production	9.62e-11	1.89e-08	5.97	19	[P2RX7 - purinergic receptor p2x, ligand-gated ion channel, 7, MYD88 - myeloid differentiation primary response 88, TYROBP - tyro protein tyrosine kinase binding protein, CLEC7A - c-type lectin domain family 7, member a, IL1RAP - interleukin 1 receptor accessory protein, AIF1 - allograft inflammatory factor 1, ARHGEF2 - rho/rac guanine nucleotide exchange factor (gef) 2, TICAM1 - toll-like recept…
GO:0071310	cellular response to organic substance	1.11e-10	2.16e-08	1.93	96	[IL18 - interleukin 18 (interferon-gamma-inducing factor), IL15 - interleukin 15, LGMN - legumain, MICALL1 - mical-like 1, PSAP - prosaposin, ABCA1 - atp-binding cassette, sub-family a (abc1), member 1, TICAM1 - toll-like receptor adaptor molecule 1, CD274 - cd274 molecule, NRP1 - neuropilin 1, LDLR - low density lipoprotein receptor, TMEM173 - transmembrane protein 173, IFNAR1 - interferon (alph…
GO:0043900	regulation of multi-organism process	1.15e-10	2.19e-08	2.86	45	[TIMP1 - timp metallopeptidase inhibitor 1, DHX58 - dexh (asp-glu-x-his) box polypeptide 58, IL15 - interleukin 15, DTX3L - deltex 3-like (drosophila), OASL - 2'-5'-oligoadenylate synthetase-like, ISG20 - interferon stimulated exonuclease gene 20kda, DDX60 - dead (asp-glu-ala-asp) box polypeptide 60, STAT1 - signal transducer and activator of transcription 1, 91kda, CLEC7A - c-type lectin domain …
GO:1903561	extracellular vesicle	2e-10	2.8e-08	1.73	124	[LGMN - legumain, LGALS3BP - lectin, galactoside-binding, soluble, 3 binding protein, FN1 - fibronectin 1, PSAP - prosaposin, CD274 - cd274 molecule, BST2 - bone marrow stromal cell antigen 2, HEBP1 - heme binding protein 1, AGRN - agrin, TOLLIP - toll interacting protein, CKAP4 - cytoskeleton-associated protein 4, ENTPD1 - ectonucleoside triphosphate diphosphohydrolase 1, SCARB2 - scavenger rece…
GO:1901700	response to oxygen-containing compound	1.53e-10	2.88e-08	1.93	95	[TIMP1 - timp metallopeptidase inhibitor 1, IL15 - interleukin 15, LGMN - legumain, ABCA1 - atp-binding cassette, sub-family a (abc1), member 1, TICAM1 - toll-like receptor adaptor molecule 1, CD274 - cd274 molecule, ACSL1 - acyl-coa synthetase long-chain family member 1, SLC11A1 - solute carrier family 11 (proton-coupled divalent metal ion transporter), member 1, IFNAR1 - interferon (alpha, beta…
GO:0098805	whole membrane	2.53e-10	2.88e-08	1.91	95	[AP2A1 - adaptor-related protein complex 2, alpha 1 subunit, NAPEPLD - n-acyl phosphatidylethanolamine phospholipase d, MICALL1 - mical-like 1, DTX3L - deltex 3-like (drosophila), PSAP - prosaposin, CD274 - cd274 molecule, TICAM1 - toll-like receptor adaptor molecule 1, CLEC5A - c-type lectin domain family 5, member a, VPS35 - vacuolar protein sorting 35 homolog (s. cerevisiae), ACSL1 - acyl-coa …
GO:0043202	lysosomal lumen	2.69e-10	2.88e-08	5.66	19	[LAMP2 - lysosomal-associated membrane protein 2, NEU1 - sialidase 1 (lysosomal sialidase), GBA - glucosidase, beta, acid, LGMN - legumain, SCARB2 - scavenger receptor class b, member 2, GAA - glucosidase, alpha; acid, CTSB - cathepsin b, PSAP - prosaposin, GNS - glucosamine (n-acetyl)-6-sulfatase, CTSS - cathepsin s, IFI30 - interferon, gamma-inducible protein 30, TXNDC5 - thioredoxin domain con…
GO:0009897	external side of plasma membrane	2.95e-10	2.98e-08	3.52	32	[CCR4 - chemokine (c-c motif) receptor 4, ICAM1 - intercellular adhesion molecule 1, CCR6 - chemokine (c-c motif) receptor 6, FLOT1 - flotillin 1, EBI3 - epstein-barr virus induced 3, ABCA1 - atp-binding cassette, sub-family a (abc1), member 1, CCR1 - chemokine (c-c motif) receptor 1, CD274 - cd274 molecule, ABCG2 - atp-binding cassette, sub-family g (white), member 2, TNFRSF4 - tumor necrosis fa…
GO:0070062	extracellular exosome	2.33e-10	3.02e-08	1.73	123	[LGMN - legumain, LGALS3BP - lectin, galactoside-binding, soluble, 3 binding protein, FN1 - fibronectin 1, PSAP - prosaposin, CD274 - cd274 molecule, BST2 - bone marrow stromal cell antigen 2, HEBP1 - heme binding protein 1, AGRN - agrin, TOLLIP - toll interacting protein, CKAP4 - cytoskeleton-associated protein 4, ENTPD1 - ectonucleoside triphosphate diphosphohydrolase 1, SCARB2 - scavenger rece…
GO:0043230	extracellular organelle	2e-10	3.03e-08	1.73	124	[LGMN - legumain, LGALS3BP - lectin, galactoside-binding, soluble, 3 binding protein, FN1 - fibronectin 1, PSAP - prosaposin, CD274 - cd274 molecule, BST2 - bone marrow stromal cell antigen 2, HEBP1 - heme binding protein 1, AGRN - agrin, TOLLIP - toll interacting protein, CKAP4 - cytoskeleton-associated protein 4, ENTPD1 - ectonucleoside triphosphate diphosphohydrolase 1, SCARB2 - scavenger rece…
GO:0016021	integral component of membrane	2.51e-10	3.05e-08	1.51	186	[EMP1 - epithelial membrane protein 1, SLC35A4 - solute carrier family 35, member a4, UNC93B1 - unc-93 homolog b1 (c. elegans), SDHD - succinate dehydrogenase complex, subunit d, integral membrane protein, INTS5 - integrator complex subunit 5, ABCA1 - atp-binding cassette, sub-family a (abc1), member 1, CD274 - cd274 molecule, CLEC5A - c-type lectin domain family 5, member a, CD69 - cd69 molecule…
GO:0002224	toll-like receptor signaling pathway	1.86e-10	3.46e-08	5.2	21	[LGMN - legumain, TNIP1 - tnfaip3 interacting protein 1, CTSB - cathepsin b, MYD88 - myeloid differentiation primary response 88, UNC93B1 - unc-93 homolog b1 (c. elegans), MAPKAPK2 - mitogen-activated protein kinase-activated protein kinase 2, TNIP3 - tnfaip3 interacting protein 3, NFKBIA - nuclear factor of kappa light polypeptide gene enhancer in b-cells inhibitor, alpha, CTSS - cathepsin s, S1…
GO:0023056	positive regulation of signaling	2.48e-10	4.55e-08	1.78	113	[IL18 - interleukin 18 (interferon-gamma-inducing factor), DHX58 - dexh (asp-glu-x-his) box polypeptide 58, IL15 - interleukin 15, LGMN - legumain, DDX60 - dead (asp-glu-ala-asp) box polypeptide 60, PSAP - prosaposin, RBCK1 - ranbp-type and c3hc4-type zinc finger containing 1, TICAM1 - toll-like receptor adaptor molecule 1, TMEM106A - transmembrane protein 106a, NRP1 - neuropilin 1, BST2 - bone m…
GO:0060205	cytoplasmic vesicle lumen	9.77e-10	8.46e-08	2.93	39	[NEU1 - sialidase 1 (lysosomal sialidase), TIMP1 - timp metallopeptidase inhibitor 1, CSTB - cystatin b (stefin b), LGALS3BP - lectin, galactoside-binding, soluble, 3 binding protein, FN1 - fibronectin 1, OSTF1 - osteoclast stimulating factor 1, GNS - glucosamine (n-acetyl)-6-sulfatase, SRGN - serglycin, PRDX4 - peroxiredoxin 4, B2M - beta-2-microglobulin, PDXK - pyridoxal (pyridoxine, vitamin b6…
GO:0005887	integral component of plasma membrane	1.02e-09	8.46e-08	2.09	72	[ABCA1 - atp-binding cassette, sub-family a (abc1), member 1, CLEC5A - c-type lectin domain family 5, member a, SLC16A3 - solute carrier family 16 (monocarboxylate transporter), member 3, SEMA4A - sema domain, immunoglobulin domain (ig), transmembrane domain (tm) and short cytoplasmic domain, (semaphorin) 4a, CD69 - cd69 molecule, SLC11A1 - solute carrier family 11 (proton-coupled divalent metal …
GO:0031983	vesicle lumen	9.77e-10	8.88e-08	2.93	39	[NEU1 - sialidase 1 (lysosomal sialidase), TIMP1 - timp metallopeptidase inhibitor 1, CSTB - cystatin b (stefin b), LGALS3BP - lectin, galactoside-binding, soluble, 3 binding protein, FN1 - fibronectin 1, OSTF1 - osteoclast stimulating factor 1, GNS - glucosamine (n-acetyl)-6-sulfatase, SRGN - serglycin, PRDX4 - peroxiredoxin 4, B2M - beta-2-microglobulin, PDXK - pyridoxal (pyridoxine, vitamin b6…
GO:0005615	extracellular space	1.15e-09	9.13e-08	2.17	66	[TIMP1 - timp metallopeptidase inhibitor 1, CSTB - cystatin b (stefin b), IL18 - interleukin 18 (interferon-gamma-inducing factor), LGALS3BP - lectin, galactoside-binding, soluble, 3 binding protein, IL15 - interleukin 15, FN1 - fibronectin 1, PSAP - prosaposin, PDIA4 - protein disulfide isomerase family a, member 4, EGFL7 - egf-like-domain, multiple 7, SRGN - serglycin, EBI3 - epstein-barr virus…
GO:0016020	membrane	9.7e-10	9.28e-08	1.28	316	[EMP1 - epithelial membrane protein 1, LGALS3BP - lectin, galactoside-binding, soluble, 3 binding protein, BMX - bmx non-receptor tyrosine kinase, UNC93B1 - unc-93 homolog b1 (c. elegans), AAMP - angio-associated, migratory cell protein, EBI3 - epstein-barr virus induced 3, ABCA1 - atp-binding cassette, sub-family a (abc1), member 1, CLEC5A - c-type lectin domain family 5, member a, CD274 - cd274…
GO:0009986	cell surface	1.24e-09	9.37e-08	2.63	46	[ICAM1 - intercellular adhesion molecule 1, LRPAP1 - low density lipoprotein receptor-related protein associated protein 1, CCR6 - chemokine (c-c motif) receptor 6, IL15 - interleukin 15, TYROBP - tyro protein tyrosine kinase binding protein, AAMP - angio-associated, migratory cell protein, CLEC7A - c-type lectin domain family 7, member a, EGFL7 - egf-like-domain, multiple 7, PDIA4 - protein disu…
GO:0070663	regulation of leukocyte proliferation	7.62e-10	1.38e-07	3.56	30	[IL18 - interleukin 18 (interferon-gamma-inducing factor), IL15 - interleukin 15, TYROBP - tyro protein tyrosine kinase binding protein, EBI3 - epstein-barr virus induced 3, STAT5B - signal transducer and activator of transcription 5b, TICAM1 - toll-like receptor adaptor molecule 1, CD274 - cd274 molecule, IL23A - interleukin 23, alpha subunit p19, TNFRSF4 - tumor necrosis factor receptor superfa…
GO:0002757	immune response-activating signal transduction	7.91e-10	1.4e-07	2.73	44	[FFAR2 - free fatty acid receptor 2, PSME1 - proteasome (prosome, macropain) activator subunit 1 (pa28 alpha), LGMN - legumain, PSME2 - proteasome (prosome, macropain) activator subunit 2 (pa28 beta), CMKLR1 - chemokine-like receptor 1, MYD88 - myeloid differentiation primary response 88, UNC93B1 - unc-93 homolog b1 (c. elegans), CLEC7A - c-type lectin domain family 7, member a, TICAM1 - toll-lik…
GO:0010647	positive regulation of cell communication	7.89e-10	1.41e-07	1.76	111	[IL18 - interleukin 18 (interferon-gamma-inducing factor), DHX58 - dexh (asp-glu-x-his) box polypeptide 58, IL15 - interleukin 15, LGMN - legumain, DDX60 - dead (asp-glu-ala-asp) box polypeptide 60, PSAP - prosaposin, RBCK1 - ranbp-type and c3hc4-type zinc finger containing 1, TICAM1 - toll-like receptor adaptor molecule 1, TMEM106A - transmembrane protein 106a, NRP1 - neuropilin 1, BST2 - bone m…
GO:0050670	regulation of lymphocyte proliferation	1.22e-09	2.13e-07	3.59	29	[IL18 - interleukin 18 (interferon-gamma-inducing factor), IL15 - interleukin 15, TYROBP - tyro protein tyrosine kinase binding protein, EBI3 - epstein-barr virus induced 3, STAT5B - signal transducer and activator of transcription 5b, TICAM1 - toll-like receptor adaptor molecule 1, CD274 - cd274 molecule, IL23A - interleukin 23, alpha subunit p19, TNFRSF4 - tumor necrosis factor receptor superfa…
GO:1902533	positive regulation of intracellular signal transduction	1.32e-09	2.28e-07	2.03	76	[DHX58 - dexh (asp-glu-x-his) box polypeptide 58, IL18 - interleukin 18 (interferon-gamma-inducing factor), IL15 - interleukin 15, NEK6 - nima-related kinase 6, DDX60 - dead (asp-glu-ala-asp) box polypeptide 60, PSAP - prosaposin, RBCK1 - ranbp-type and c3hc4-type zinc finger containing 1, TICAM1 - toll-like receptor adaptor molecule 1, TMEM106A - transmembrane protein 106a, IL23A - interleukin 2…
GO:0070887	cellular response to chemical stimulus	1.42e-09	2.41e-07	1.76	108	[IL18 - interleukin 18 (interferon-gamma-inducing factor), IL15 - interleukin 15, LGMN - legumain, PSAP - prosaposin, ABCA1 - atp-binding cassette, sub-family a (abc1), member 1, TICAM1 - toll-like receptor adaptor molecule 1, CD274 - cd274 molecule, CD69 - cd69 molecule, NRP1 - neuropilin 1, TMEM173 - transmembrane protein 173, LDLR - low density lipoprotein receptor, PML - promyelocytic leukemi…
GO:0032944	regulation of mononuclear cell proliferation	1.45e-09	2.44e-07	3.57	29	[IL18 - interleukin 18 (interferon-gamma-inducing factor), IL15 - interleukin 15, TYROBP - tyro protein tyrosine kinase binding protein, EBI3 - epstein-barr virus induced 3, STAT5B - signal transducer and activator of transcription 5b, CD274 - cd274 molecule, TICAM1 - toll-like receptor adaptor molecule 1, IL23A - interleukin 23, alpha subunit p19, TNFRSF4 - tumor necrosis factor receptor superfa…
GO:0098552	side of membrane	3.4e-09	2.47e-07	2.96	36	[CCR4 - chemokine (c-c motif) receptor 4, ICAM1 - intercellular adhesion molecule 1, CCR6 - chemokine (c-c motif) receptor 6, FLOT1 - flotillin 1, EBI3 - epstein-barr virus induced 3, ABCA1 - atp-binding cassette, sub-family a (abc1), member 1, CCR1 - chemokine (c-c motif) receptor 1, ABCG2 - atp-binding cassette, sub-family g (white), member 2, CD274 - cd274 molecule, TNFRSF4 - tumor necrosis fa…
GO:0050707	regulation of cytokine secretion	1.61e-09	2.67e-07	3.87	26	[FFAR2 - free fatty acid receptor 2, FN1 - fibronectin 1, SRGN - serglycin, CLEC5A - c-type lectin domain family 5, member a, CD274 - cd274 molecule, TNFRSF4 - tumor necrosis factor receptor superfamily, member 4, ARG2 - arginase 2, CD14 - cd14 molecule, PML - promyelocytic leukemia, TLR2 - toll-like receptor 2, TLR8 - toll-like receptor 8, TLR4 - toll-like receptor 4, FOXP3 - forkhead box p3, CA…
GO:0034774	secretory granule lumen	3.9e-09	2.72e-07	2.89	37	[NEU1 - sialidase 1 (lysosomal sialidase), TIMP1 - timp metallopeptidase inhibitor 1, CSTB - cystatin b (stefin b), LGALS3BP - lectin, galactoside-binding, soluble, 3 binding protein, FN1 - fibronectin 1, OSTF1 - osteoclast stimulating factor 1, GNS - glucosamine (n-acetyl)-6-sulfatase, SRGN - serglycin, PRDX4 - peroxiredoxin 4, B2M - beta-2-microglobulin, PDXK - pyridoxal (pyridoxine, vitamin b6…
GO:0031974	membrane-enclosed lumen	4.92e-09	3.09e-07	1.88	85	[TIMP1 - timp metallopeptidase inhibitor 1, CSTB - cystatin b (stefin b), LGMN - legumain, LGALS3BP - lectin, galactoside-binding, soluble, 3 binding protein, FN1 - fibronectin 1, OSTF1 - osteoclast stimulating factor 1, PSAP - prosaposin, PDIA4 - protein disulfide isomerase family a, member 4, EBI3 - epstein-barr virus induced 3, GNS - glucosamine (n-acetyl)-6-sulfatase, SRGN - serglycin, IFI30 …
GO:0070013	intracellular organelle lumen	4.92e-09	3.2e-07	1.88	85	[TIMP1 - timp metallopeptidase inhibitor 1, CSTB - cystatin b (stefin b), LGMN - legumain, LGALS3BP - lectin, galactoside-binding, soluble, 3 binding protein, FN1 - fibronectin 1, OSTF1 - osteoclast stimulating factor 1, PSAP - prosaposin, PDIA4 - protein disulfide isomerase family a, member 4, EBI3 - epstein-barr virus induced 3, GNS - glucosamine (n-acetyl)-6-sulfatase, SRGN - serglycin, IFI30 …
GO:0043233	organelle lumen	4.92e-09	3.31e-07	1.88	85	[TIMP1 - timp metallopeptidase inhibitor 1, CSTB - cystatin b (stefin b), LGMN - legumain, LGALS3BP - lectin, galactoside-binding, soluble, 3 binding protein, FN1 - fibronectin 1, OSTF1 - osteoclast stimulating factor 1, PSAP - prosaposin, PDIA4 - protein disulfide isomerase family a, member 4, EBI3 - epstein-barr virus induced 3, GNS - glucosamine (n-acetyl)-6-sulfatase, SRGN - serglycin, IFI30 …
GO:0048518	positive regulation of biological process	2.18e-09	3.58e-07	1.32	275	[DHX58 - dexh (asp-glu-x-his) box polypeptide 58, UNC93B1 - unc-93 homolog b1 (c. elegans), AAMP - angio-associated, migratory cell protein, DDX60 - dead (asp-glu-ala-asp) box polypeptide 60, EBI3 - epstein-barr virus induced 3, ABCA1 - atp-binding cassette, sub-family a (abc1), member 1, CLEC5A - c-type lectin domain family 5, member a, CD274 - cd274 molecule, TICAM1 - toll-like receptor adaptor…
GO:0010941	regulation of cell death	2.28e-09	3.69e-07	1.76	105	[LGMN - legumain, PSAP - prosaposin, RBCK1 - ranbp-type and c3hc4-type zinc finger containing 1, CLEC5A - c-type lectin domain family 5, member a, CD274 - cd274 molecule, NRP1 - neuropilin 1, IDO1 - indoleamine 2,3-dioxygenase 1, PML - promyelocytic leukemia, BTG1 - b-cell translocation gene 1, anti-proliferative, DCUN1D3 - dcn1, defective in cullin neddylation 1, domain containing 3, PYCARD - py…
GO:0051241	negative regulation of multicellular organismal process	2.37e-09	3.79e-07	1.99	77	[TIMP1 - timp metallopeptidase inhibitor 1, DHX58 - dexh (asp-glu-x-his) box polypeptide 58, LGMN - legumain, IL15 - interleukin 15, FN1 - fibronectin 1, SRGN - serglycin, CD274 - cd274 molecule, HLX - h2.0-like homeobox, SEMA4A - sema domain, immunoglobulin domain (ig), transmembrane domain (tm) and short cytoplasmic domain, (semaphorin) 4a, IL23A - interleukin 23, alpha subunit p19, ZHX2 - zinc…
GO:0002764	immune response-regulating signaling pathway	2.52e-09	3.99e-07	2.6	45	[FFAR2 - free fatty acid receptor 2, PSME1 - proteasome (prosome, macropain) activator subunit 1 (pa28 alpha), LGMN - legumain, PSME2 - proteasome (prosome, macropain) activator subunit 2 (pa28 beta), CMKLR1 - chemokine-like receptor 1, MYD88 - myeloid differentiation primary response 88, UNC93B1 - unc-93 homolog b1 (c. elegans), CLEC7A - c-type lectin domain family 7, member a, TICAM1 - toll-lik…
GO:0071216	cellular response to biotic stimulus	2.77e-09	4.33e-07	3.57	28	[ICAM1 - intercellular adhesion molecule 1, MYD88 - myeloid differentiation primary response 88, CLEC7A - c-type lectin domain family 7, member a, ABCA1 - atp-binding cassette, sub-family a (abc1), member 1, TICAM1 - toll-like receptor adaptor molecule 1, CD274 - cd274 molecule, CD14 - cd14 molecule, SCIMP - slp adaptor and csk interacting membrane protein, TLR2 - toll-like receptor 2, CD180 - cd…
GO:0009967	positive regulation of signal transduction	3.25e-09	5.02e-07	1.76	104	[IL18 - interleukin 18 (interferon-gamma-inducing factor), DHX58 - dexh (asp-glu-x-his) box polypeptide 58, IL15 - interleukin 15, DDX60 - dead (asp-glu-ala-asp) box polypeptide 60, PSAP - prosaposin, RBCK1 - ranbp-type and c3hc4-type zinc finger containing 1, TICAM1 - toll-like receptor adaptor molecule 1, TMEM106A - transmembrane protein 106a, NRP1 - neuropilin 1, BST2 - bone marrow stromal cel…
GO:0051247	positive regulation of protein metabolic process	3.42e-09	5.24e-07	1.74	107	[IL18 - interleukin 18 (interferon-gamma-inducing factor), IL15 - interleukin 15, LGMN - legumain, FN1 - fibronectin 1, PSAP - prosaposin, EBI3 - epstein-barr virus induced 3, TICAM1 - toll-like receptor adaptor molecule 1, TMEM106A - transmembrane protein 106a, NRP1 - neuropilin 1, LDLR - low density lipoprotein receptor, PML - promyelocytic leukemia, TOLLIP - toll interacting protein, TLR8 - to…
GO:0005764	lysosome	9.34e-09	5.48e-07	2.9	35	[NEU1 - sialidase 1 (lysosomal sialidase), LGMN - legumain, DTX3L - deltex 3-like (drosophila), UNC93B1 - unc-93 homolog b1 (c. elegans), PLBD1 - phospholipase b domain containing 1, PSAP - prosaposin, SRGN - serglycin, IFI30 - interferon, gamma-inducible protein 30, VPS35 - vacuolar protein sorting 35 homolog (s. cerevisiae), SLC11A1 - solute carrier family 11 (proton-coupled divalent metal ion …
GO:0000323	lytic vacuole	9.34e-09	5.66e-07	2.9	35	[NEU1 - sialidase 1 (lysosomal sialidase), LGMN - legumain, DTX3L - deltex 3-like (drosophila), UNC93B1 - unc-93 homolog b1 (c. elegans), PLBD1 - phospholipase b domain containing 1, PSAP - prosaposin, SRGN - serglycin, IFI30 - interferon, gamma-inducible protein 30, VPS35 - vacuolar protein sorting 35 homolog (s. cerevisiae), SLC11A1 - solute carrier family 11 (proton-coupled divalent metal ion …
GO:0032722	positive regulation of chemokine production	3.75e-09	5.67e-07	6.84	14	[CSF1R - colony stimulating factor 1 receptor, FFAR2 - free fatty acid receptor 2, CLEC7A - c-type lectin domain family 7, member a, ADAM17 - adam metallopeptidase domain 17, AIF1 - allograft inflammatory factor 1, TICAM1 - toll-like receptor adaptor molecule 1, TLR2 - toll-like receptor 2, TLR4 - toll-like receptor 4, HMOX1 - heme oxygenase (decycling) 1, EIF2AK2 - eukaryotic translation initiat…
GO:0005773	vacuole	1.21e-08	6.86e-07	2.69	39	[NEU1 - sialidase 1 (lysosomal sialidase), LGMN - legumain, DTX3L - deltex 3-like (drosophila), UNC93B1 - unc-93 homolog b1 (c. elegans), TBC1D17 - tbc1 domain family, member 17, PLBD1 - phospholipase b domain containing 1, PSAP - prosaposin, SRGN - serglycin, IFI30 - interferon, gamma-inducible protein 30, TICAM1 - toll-like receptor adaptor molecule 1, VPS35 - vacuolar protein sorting 35 homolo…
GO:0006810	transport	4.9e-09	7.32e-07	1.41	206	[LGALS3BP - lectin, galactoside-binding, soluble, 3 binding protein, UNC93B1 - unc-93 homolog b1 (c. elegans), PDIA4 - protein disulfide isomerase family a, member 4, ABCA1 - atp-binding cassette, sub-family a (abc1), member 1, CLEC5A - c-type lectin domain family 5, member a, CD274 - cd274 molecule, NRP1 - neuropilin 1, BST2 - bone marrow stromal cell antigen 2, LDLR - low density lipoprotein re…
GO:0023051	regulation of signaling	5.05e-09	7.39e-07	1.47	181	[IL18 - interleukin 18 (interferon-gamma-inducing factor), DHX58 - dexh (asp-glu-x-his) box polypeptide 58, IL15 - interleukin 15, LGMN - legumain, FN1 - fibronectin 1, DDX60 - dead (asp-glu-ala-asp) box polypeptide 60, PSAP - prosaposin, ABCA1 - atp-binding cassette, sub-family a (abc1), member 1, TICAM1 - toll-like receptor adaptor molecule 1, RBCK1 - ranbp-type and c3hc4-type zinc finger conta…
GO:0051246	regulation of protein metabolic process	5.04e-09	7.45e-07	1.53	156	[IL18 - interleukin 18 (interferon-gamma-inducing factor), IL15 - interleukin 15, LGMN - legumain, FN1 - fibronectin 1, DTX3L - deltex 3-like (drosophila), PSAP - prosaposin, EBI3 - epstein-barr virus induced 3, TICAM1 - toll-like receptor adaptor molecule 1, TMEM106A - transmembrane protein 106a, NRP1 - neuropilin 1, LDLR - low density lipoprotein receptor, BST2 - bone marrow stromal cell antige…
GO:0071219	cellular response to molecule of bacterial origin	5.41e-09	7.84e-07	3.79	25	[ICAM1 - intercellular adhesion molecule 1, MYD88 - myeloid differentiation primary response 88, ABCA1 - atp-binding cassette, sub-family a (abc1), member 1, CD274 - cd274 molecule, TICAM1 - toll-like receptor adaptor molecule 1, CD14 - cd14 molecule, TLR2 - toll-like receptor 2, CD180 - cd180 molecule, TLR4 - toll-like receptor 4, CASP1 - caspase 1, apoptosis-related cysteine peptidase, PYCARD -…
GO:0071222	cellular response to lipopolysaccharide	5.75e-09	8.25e-07	3.91	24	[VDR - vitamin d (1,25- dihydroxyvitamin d3) receptor, ICAM1 - intercellular adhesion molecule 1, CSF3 - colony stimulating factor 3 (granulocyte), CMPK2 - cytidine monophosphate (ump-cmp) kinase 2, mitochondrial, MYD88 - myeloid differentiation primary response 88, TNIP3 - tnfaip3 interacting protein 3, NFKB1 - nuclear factor of kappa light polypeptide gene enhancer in b-cells 1, ABCA1 - atp-bin…
GO:0009617	response to bacterium	8.42e-09	1.2e-06	3.6	26	[CCR4 - chemokine (c-c motif) receptor 4, DHX58 - dexh (asp-glu-x-his) box polypeptide 58, MYD88 - myeloid differentiation primary response 88, GPX1 - glutathione peroxidase 1, ADAM17 - adam metallopeptidase domain 17, IL23A - interleukin 23, alpha subunit p19, SLC11A1 - solute carrier family 11 (proton-coupled divalent metal ion transporter), member 1, C15orf48 - chromosome 15 open reading frame…
GO:0050708	regulation of protein secretion	8.66e-09	1.22e-06	2.64	41	[FFAR2 - free fatty acid receptor 2, FN1 - fibronectin 1, SRGN - serglycin, CLEC5A - c-type lectin domain family 5, member a, CD274 - cd274 molecule, VPS35 - vacuolar protein sorting 35 homolog (s. cerevisiae), TNFRSF4 - tumor necrosis factor receptor superfamily, member 4, ARG2 - arginase 2, CD14 - cd14 molecule, PML - promyelocytic leukemia, TLR2 - toll-like receptor 2, TLR4 - toll-like recepto…
GO:0042127	regulation of cell proliferation	9.73e-09	1.35e-06	1.79	94	[TIMP1 - timp metallopeptidase inhibitor 1, IL18 - interleukin 18 (interferon-gamma-inducing factor), LGMN - legumain, IL15 - interleukin 15, FN1 - fibronectin 1, EGFL7 - egf-like-domain, multiple 7, EBI3 - epstein-barr virus induced 3, TICAM1 - toll-like receptor adaptor molecule 1, CD274 - cd274 molecule, HLX - h2.0-like homeobox, IL23A - interleukin 23, alpha subunit p19, NRP1 - neuropilin 1, …
GO:0002791	regulation of peptide secretion	1e-08	1.38e-06	2.59	42	[FFAR2 - free fatty acid receptor 2, FN1 - fibronectin 1, SRGN - serglycin, CLEC5A - c-type lectin domain family 5, member a, CD274 - cd274 molecule, VPS35 - vacuolar protein sorting 35 homolog (s. cerevisiae), TNFRSF4 - tumor necrosis factor receptor superfamily, member 4, ARG2 - arginase 2, CD14 - cd14 molecule, PML - promyelocytic leukemia, TLR2 - toll-like receptor 2, TLR4 - toll-like recepto…
GO:0002526	acute inflammatory response	1.14e-08	1.55e-06	6.93	13	[ICAM1 - intercellular adhesion molecule 1, FN1 - fibronectin 1, S100A8 - s100 calcium binding protein a8, TREM1 - triggering receptor expressed on myeloid cells 1, PLSCR1 - phospholipid scramblase 1, IL1A - interleukin 1, alpha, PRCP - prolylcarboxypeptidase (angiotensinase c), VCAM1 - vascular cell adhesion molecule 1, CD163 - cd163 molecule, PTGES - prostaglandin e synthase, SIGIRR - single im…
GO:0010646	regulation of cell communication	1.23e-08	1.65e-06	1.46	178	[IL18 - interleukin 18 (interferon-gamma-inducing factor), DHX58 - dexh (asp-glu-x-his) box polypeptide 58, IL15 - interleukin 15, LGMN - legumain, FN1 - fibronectin 1, DDX60 - dead (asp-glu-ala-asp) box polypeptide 60, PSAP - prosaposin, ABCA1 - atp-binding cassette, sub-family a (abc1), member 1, TICAM1 - toll-like receptor adaptor molecule 1, RBCK1 - ranbp-type and c3hc4-type zinc finger conta…
GO:0002697	regulation of immune effector process	1.28e-08	1.7e-06	2.64	40	[FFAR2 - free fatty acid receptor 2, DHX58 - dexh (asp-glu-x-his) box polypeptide 58, IL18 - interleukin 18 (interferon-gamma-inducing factor), IL15 - interleukin 15, DTX3L - deltex 3-like (drosophila), DDX60 - dead (asp-glu-ala-asp) box polypeptide 60, STAT1 - signal transducer and activator of transcription 1, 91kda, STAT5B - signal transducer and activator of transcription 5b, HLX - h2.0-like …
GO:0009966	regulation of signal transduction	1.31e-08	1.73e-06	1.49	165	[IL18 - interleukin 18 (interferon-gamma-inducing factor), DHX58 - dexh (asp-glu-x-his) box polypeptide 58, IL15 - interleukin 15, LGMN - legumain, FN1 - fibronectin 1, DDX60 - dead (asp-glu-ala-asp) box polypeptide 60, PSAP - prosaposin, ABCA1 - atp-binding cassette, sub-family a (abc1), member 1, TICAM1 - toll-like receptor adaptor molecule 1, RBCK1 - ranbp-type and c3hc4-type zinc finger conta…
GO:0050729	positive regulation of inflammatory response	1.36e-08	1.78e-06	4.2	21	[FFAR2 - free fatty acid receptor 2, NAPEPLD - n-acyl phosphatidylethanolamine phospholipase d, IL18 - interleukin 18 (interferon-gamma-inducing factor), IL15 - interleukin 15, TNIP1 - tnfaip3 interacting protein 1, MYD88 - myeloid differentiation primary response 88, NFKBIA - nuclear factor of kappa light polypeptide gene enhancer in b-cells inhibitor, alpha, CLEC7A - c-type lectin domain family…
GO:0098588	bounding membrane of organelle	3.25e-08	1.79e-06	1.63	115	[DTX3L - deltex 3-like (drosophila), UNC93B1 - unc-93 homolog b1 (c. elegans), PSAP - prosaposin, CLEC5A - c-type lectin domain family 5, member a, TICAM1 - toll-like receptor adaptor molecule 1, CD274 - cd274 molecule, TMEM173 - transmembrane protein 173, BST2 - bone marrow stromal cell antigen 2, LDLR - low density lipoprotein receptor, PML - promyelocytic leukemia, TLR8 - toll-like receptor 8,…
GO:0042108	positive regulation of cytokine biosynthetic process	1.48e-08	1.93e-06	5.41	16	[TYROBP - tyro protein tyrosine kinase binding protein, MAPKAPK2 - mitogen-activated protein kinase-activated protein kinase 2, CLEC7A - c-type lectin domain family 7, member a, EBI3 - epstein-barr virus induced 3, STAT5B - signal transducer and activator of transcription 5b, TICAM1 - toll-like receptor adaptor molecule 1, IL1A - interleukin 1, alpha, BCL3 - b-cell cll/lymphoma 3, IL27 - interleu…
GO:0031348	negative regulation of defense response	1.67e-08	2.1e-06	3.49	26	[DHX58 - dexh (asp-glu-x-his) box polypeptide 58, GPX1 - glutathione peroxidase 1, VPS35 - vacuolar protein sorting 35 homolog (s. cerevisiae), ADAR - adenosine deaminase, rna-specific, ARG2 - arginase 2, LDLR - low density lipoprotein receptor, GRN - granulin, NMI - n-myc (and stat) interactor, FOXP3 - forkhead box p3, CNR2 - cannabinoid receptor 2 (macrophage), PYCARD - pyd and card domain cont…
GO:0065009	regulation of molecular function	1.64e-08	2.11e-06	1.5	158	[IL18 - interleukin 18 (interferon-gamma-inducing factor), LGMN - legumain, FN1 - fibronectin 1, DTX3L - deltex 3-like (drosophila), PSAP - prosaposin, TICAM1 - toll-like receptor adaptor molecule 1, RBCK1 - ranbp-type and c3hc4-type zinc finger containing 1, NRP1 - neuropilin 1, TMEM173 - transmembrane protein 173, BST2 - bone marrow stromal cell antigen 2, TRIM26 - tripartite motif containing 2…
GO:0042981	regulation of apoptotic process	1.66e-08	2.12e-06	1.76	96	[TIMP1 - timp metallopeptidase inhibitor 1, BCL2L14 - bcl2-like 14 (apoptosis facilitator), LGMN - legumain, CAPN3 - calpain 3, (p94), CD274 - cd274 molecule, CLEC5A - c-type lectin domain family 5, member a, RBCK1 - ranbp-type and c3hc4-type zinc finger containing 1, NRP1 - neuropilin 1, RPL10 - ribosomal protein l10, CTLA4 - cytotoxic t-lymphocyte-associated protein 4, IDO1 - indoleamine 2,3-di…
GO:0048522	positive regulation of cellular process	1.9e-08	2.38e-06	1.33	249	[DHX58 - dexh (asp-glu-x-his) box polypeptide 58, AAMP - angio-associated, migratory cell protein, DDX60 - dead (asp-glu-ala-asp) box polypeptide 60, EBI3 - epstein-barr virus induced 3, ABCA1 - atp-binding cassette, sub-family a (abc1), member 1, CLEC5A - c-type lectin domain family 5, member a, CD274 - cd274 molecule, TICAM1 - toll-like receptor adaptor molecule 1, NRP1 - neuropilin 1, BST2 - b…
GO:0042129	regulation of T cell proliferation	1.94e-08	2.41e-06	3.82	23	[IL18 - interleukin 18 (interferon-gamma-inducing factor), IL15 - interleukin 15, EBI3 - epstein-barr virus induced 3, STAT5B - signal transducer and activator of transcription 5b, AIF1 - allograft inflammatory factor 1, CD274 - cd274 molecule, IL23A - interleukin 23, alpha subunit p19, VSIG4 - v-set and immunoglobulin domain containing 4, CTLA4 - cytotoxic t-lymphocyte-associated protein 4, ARG2…
GO:0002793	positive regulation of peptide secretion	2.47e-08	3.03e-06	3.17	29	[FFAR2 - free fatty acid receptor 2, CD274 - cd274 molecule, CLEC5A - c-type lectin domain family 5, member a, VPS35 - vacuolar protein sorting 35 homolog (s. cerevisiae), TNFRSF4 - tumor necrosis factor receptor superfamily, member 4, CD14 - cd14 molecule, TLR2 - toll-like receptor 2, TLR8 - toll-like receptor 8, TLR4 - toll-like receptor 4, CASP1 - caspase 1, apoptosis-related cysteine peptidas…
GO:0050714	positive regulation of protein secretion	2.6e-08	3.17e-06	3.24	28	[FFAR2 - free fatty acid receptor 2, CLEC5A - c-type lectin domain family 5, member a, CD274 - cd274 molecule, VPS35 - vacuolar protein sorting 35 homolog (s. cerevisiae), TNFRSF4 - tumor necrosis factor receptor superfamily, member 4, CD14 - cd14 molecule, TLR2 - toll-like receptor 2, TLR8 - toll-like receptor 8, TLR4 - toll-like receptor 4, CASP1 - caspase 1, apoptosis-related cysteine peptidas…
GO:0044440	endosomal part	6.1e-08	3.26e-06	2.27	48	[AP2A1 - adaptor-related protein complex 2, alpha 1 subunit, LRPAP1 - low density lipoprotein receptor-related protein associated protein 1, NAPEPLD - n-acyl phosphatidylethanolamine phospholipase d, MREG - melanoregulin, LGMN - legumain, MICALL1 - mical-like 1, DTX3L - deltex 3-like (drosophila), MYD88 - myeloid differentiation primary response 88, SPHK1 - sphingosine kinase 1, TICAM1 - toll-lik…
GO:0043067	regulation of programmed cell death	3.61e-08	4.36e-06	1.73	96	[TIMP1 - timp metallopeptidase inhibitor 1, BCL2L14 - bcl2-like 14 (apoptosis facilitator), LGMN - legumain, CAPN3 - calpain 3, (p94), CD274 - cd274 molecule, CLEC5A - c-type lectin domain family 5, member a, RBCK1 - ranbp-type and c3hc4-type zinc finger containing 1, NRP1 - neuropilin 1, RPL10 - ribosomal protein l10, CTLA4 - cytotoxic t-lymphocyte-associated protein 4, IDO1 - indoleamine 2,3-di…
GO:0070665	positive regulation of leukocyte proliferation	3.86e-08	4.61e-06	3.97	21	[IL18 - interleukin 18 (interferon-gamma-inducing factor), IL15 - interleukin 15, EBI3 - epstein-barr virus induced 3, STAT5B - signal transducer and activator of transcription 5b, CD320 - cd320 molecule, AIF1 - allograft inflammatory factor 1, CD274 - cd274 molecule, TICAM1 - toll-like receptor adaptor molecule 1, TNFRSF4 - tumor necrosis factor receptor superfamily, member 4, IL23A - interleuki…
GO:0031410	cytoplasmic vesicle	8.93e-08	4.64e-06	1.76	87	[AP2A1 - adaptor-related protein complex 2, alpha 1 subunit, NAPEPLD - n-acyl phosphatidylethanolamine phospholipase d, IL15 - interleukin 15, LGMN - legumain, MICALL1 - mical-like 1, DTX3L - deltex 3-like (drosophila), UNC93B1 - unc-93 homolog b1 (c. elegans), CAPG - capping protein (actin filament), gelsolin-like, FCHSD2 - fch and double sh3 domains 2, PSAP - prosaposin, PDIA4 - protein disulfi…
GO:0065007	biological regulation	4.11e-08	4.88e-06	1.15	431	[LGALS3BP - lectin, galactoside-binding, soluble, 3 binding protein, AAMP - angio-associated, migratory cell protein, DDX60 - dead (asp-glu-ala-asp) box polypeptide 60, PDIA4 - protein disulfide isomerase family a, member 4, ABCA1 - atp-binding cassette, sub-family a (abc1), member 1, CLEC5A - c-type lectin domain family 5, member a, AHSP - alpha hemoglobin stabilizing protein, PDIA5 - protein di…
GO:0097708	intracellular vesicle	1.1e-07	5.55e-06	1.75	87	[AP2A1 - adaptor-related protein complex 2, alpha 1 subunit, NAPEPLD - n-acyl phosphatidylethanolamine phospholipase d, LGMN - legumain, IL15 - interleukin 15, MICALL1 - mical-like 1, DTX3L - deltex 3-like (drosophila), UNC93B1 - unc-93 homolog b1 (c. elegans), CAPG - capping protein (actin filament), gelsolin-like, FCHSD2 - fch and double sh3 domains 2, PSAP - prosaposin, PDIA4 - protein disulfi…
GO:0044444	cytoplasmic part	1.17e-07	5.74e-06	1.16	409	[LGALS3BP - lectin, galactoside-binding, soluble, 3 binding protein, AAMP - angio-associated, migratory cell protein, DDX60 - dead (asp-glu-ala-asp) box polypeptide 60, PDIA4 - protein disulfide isomerase family a, member 4, ABCA1 - atp-binding cassette, sub-family a (abc1), member 1, CLEC5A - c-type lectin domain family 5, member a, AHSP - alpha hemoglobin stabilizing protein, PDIA5 - protein di…
GO:0065008	regulation of biological quality	6.75e-08	7.87e-06	1.43	175	[IL18 - interleukin 18 (interferon-gamma-inducing factor), IL15 - interleukin 15, LGMN - legumain, FN1 - fibronectin 1, FCHSD2 - fch and double sh3 domains 2, PDIA4 - protein disulfide isomerase family a, member 4, ABCA1 - atp-binding cassette, sub-family a (abc1), member 1, TICAM1 - toll-like receptor adaptor molecule 1, AHSP - alpha hemoglobin stabilizing protein, PDIA5 - protein disulfide isom…
GO:0051090	regulation of DNA-binding transcription factor activity	6.72e-08	7.91e-06	2.46	41	[PKD2 - polycystic kidney disease 2 (autosomal dominant), ICAM1 - intercellular adhesion molecule 1, FLOT1 - flotillin 1, IL18 - interleukin 18 (interferon-gamma-inducing factor), CAPN3 - calpain 3, (p94), CMKLR1 - chemokine-like receptor 1, MYD88 - myeloid differentiation primary response 88, SPHK1 - sphingosine kinase 1, TICAM1 - toll-like receptor adaptor molecule 1, RBCK1 - ranbp-type and c3h…
GO:0051092	positive regulation of NF-kappaB transcription factor activity	6.89e-08	7.97e-06	3.58	23	[ICAM1 - intercellular adhesion molecule 1, FLOT1 - flotillin 1, IL18 - interleukin 18 (interferon-gamma-inducing factor), CAPN3 - calpain 3, (p94), MYD88 - myeloid differentiation primary response 88, NFKB2 - nuclear factor of kappa light polypeptide gene enhancer in b-cells 2 (p49/p100), CFLAR - casp8 and fadd-like apoptosis regulator, NFKB1 - nuclear factor of kappa light polypeptide gene enha…
GO:0051234	establishment of localization	7.39e-08	8.47e-06	1.37	206	[LGALS3BP - lectin, galactoside-binding, soluble, 3 binding protein, UNC93B1 - unc-93 homolog b1 (c. elegans), PDIA4 - protein disulfide isomerase family a, member 4, ABCA1 - atp-binding cassette, sub-family a (abc1), member 1, CLEC5A - c-type lectin domain family 5, member a, CD274 - cd274 molecule, NRP1 - neuropilin 1, BST2 - bone marrow stromal cell antigen 2, LDLR - low density lipoprotein re…
GO:0051091	positive regulation of DNA-binding transcription factor activity	8.77e-08	9.97e-06	2.93	30	[ICAM1 - intercellular adhesion molecule 1, FLOT1 - flotillin 1, IL18 - interleukin 18 (interferon-gamma-inducing factor), CAPN3 - calpain 3, (p94), MYD88 - myeloid differentiation primary response 88, SPHK1 - sphingosine kinase 1, TICAM1 - toll-like receptor adaptor molecule 1, RBCK1 - ranbp-type and c3hc4-type zinc finger containing 1, TMEM173 - transmembrane protein 173, TRIM26 - tripartite mo…
GO:0050671	positive regulation of lymphocyte proliferation	8.87e-08	1e-05	3.95	20	[IL18 - interleukin 18 (interferon-gamma-inducing factor), IL15 - interleukin 15, EBI3 - epstein-barr virus induced 3, STAT5B - signal transducer and activator of transcription 5b, CD320 - cd320 molecule, AIF1 - allograft inflammatory factor 1, TICAM1 - toll-like receptor adaptor molecule 1, CD274 - cd274 molecule, TNFRSF4 - tumor necrosis factor receptor superfamily, member 4, IL23A - interleuki…
GO:0002831	regulation of response to biotic stimulus	1.01e-07	1.13e-05	3.77	21	[DHX58 - dexh (asp-glu-x-his) box polypeptide 58, IL15 - interleukin 15, DTX3L - deltex 3-like (drosophila), DDX60 - dead (asp-glu-ala-asp) box polypeptide 60, STAT1 - signal transducer and activator of transcription 1, 91kda, CD274 - cd274 molecule, IL23A - interleukin 23, alpha subunit p19, TMEM173 - transmembrane protein 173, ARG2 - arginase 2, HERC5 - hect and rld domain containing e3 ubiquit…
GO:0050793	regulation of developmental process	1.03e-07	1.14e-05	1.53	134	[IL18 - interleukin 18 (interferon-gamma-inducing factor), IL15 - interleukin 15, LGMN - legumain, FN1 - fibronectin 1, ABCA1 - atp-binding cassette, sub-family a (abc1), member 1, CD274 - cd274 molecule, NRP1 - neuropilin 1, LDLR - low density lipoprotein receptor, IDO1 - indoleamine 2,3-dioxygenase 1, PML - promyelocytic leukemia, SPI1 - spleen focus forming virus (sffv) proviral integration on…
GO:0032946	positive regulation of mononuclear cell proliferation	1.08e-07	1.19e-05	3.91	20	[IL18 - interleukin 18 (interferon-gamma-inducing factor), IL15 - interleukin 15, EBI3 - epstein-barr virus induced 3, STAT5B - signal transducer and activator of transcription 5b, CD320 - cd320 molecule, AIF1 - allograft inflammatory factor 1, CD274 - cd274 molecule, TICAM1 - toll-like receptor adaptor molecule 1, TNFRSF4 - tumor necrosis factor receptor superfamily, member 4, IL23A - interleuki…
GO:0005765	lysosomal membrane	2.59e-07	1.21e-05	2.51	36	[NEU1 - sialidase 1 (lysosomal sialidase), AP1S3 - adaptor-related protein complex 1, sigma 3 subunit, AP2A1 - adaptor-related protein complex 2, alpha 1 subunit, FLOT1 - flotillin 1, MREG - melanoregulin, DTX3L - deltex 3-like (drosophila), PSAP - prosaposin, VPS35 - vacuolar protein sorting 35 homolog (s. cerevisiae), LDLR - low density lipoprotein receptor, BST2 - bone marrow stromal cell anti…
GO:0098852	lytic vacuole membrane	2.59e-07	1.24e-05	2.51	36	[NEU1 - sialidase 1 (lysosomal sialidase), AP1S3 - adaptor-related protein complex 1, sigma 3 subunit, AP2A1 - adaptor-related protein complex 2, alpha 1 subunit, FLOT1 - flotillin 1, MREG - melanoregulin, DTX3L - deltex 3-like (drosophila), PSAP - prosaposin, VPS35 - vacuolar protein sorting 35 homolog (s. cerevisiae), LDLR - low density lipoprotein receptor, BST2 - bone marrow stromal cell anti…
GO:0030666	endocytic vesicle membrane	3.01e-07	1.37e-05	3.84	19	[LAMP2 - lysosomal-associated membrane protein 2, AP2A1 - adaptor-related protein complex 2, alpha 1 subunit, LAMP1 - lysosomal-associated membrane protein 1, SCARB2 - scavenger receptor class b, member 2, AP2S1 - adaptor-related protein complex 2, sigma 1 subunit, RAB20 - rab20, member ras oncogene family, B2M - beta-2-microglobulin, ENTPD7 - ectonucleoside triphosphate diphosphohydrolase 7, SLC…
GO:0043901	negative regulation of multi-organism process	1.31e-07	1.43e-05	3.58	22	[RSAD2 - radical s-adenosyl methionine domain containing 2, IFITM3 - interferon induced transmembrane protein 3, TIMP1 - timp metallopeptidase inhibitor 1, DHX58 - dexh (asp-glu-x-his) box polypeptide 58, TNIP1 - tnfaip3 interacting protein 1, OASL - 2'-5'-oligoadenylate synthetase-like, ISG20 - interferon stimulated exonuclease gene 20kda, STAT1 - signal transducer and activator of transcription…
GO:0051046	regulation of secretion	1.34e-07	1.45e-05	2.12	53	[FN1 - fibronectin 1, SRGN - serglycin, CLEC5A - c-type lectin domain family 5, member a, CD274 - cd274 molecule, VPS35 - vacuolar protein sorting 35 homolog (s. cerevisiae), PML - promyelocytic leukemia, TLR2 - toll-like receptor 2, TLR8 - toll-like receptor 8, TLR4 - toll-like receptor 4, FOXP3 - forkhead box p3, RHBDF2 - rhomboid 5 homolog 2 (drosophila), CASP1 - caspase 1, apoptosis-related c…
GO:0032270	positive regulation of cellular protein metabolic process	1.51e-07	1.62e-05	1.68	96	[IL18 - interleukin 18 (interferon-gamma-inducing factor), LGMN - legumain, IL15 - interleukin 15, FN1 - fibronectin 1, CAPN3 - calpain 3, (p94), PSAP - prosaposin, TICAM1 - toll-like receptor adaptor molecule 1, TMEM106A - transmembrane protein 106a, IL23A - interleukin 23, alpha subunit p19, VPS35 - vacuolar protein sorting 35 homolog (s. cerevisiae), ACSL1 - acyl-coa synthetase long-chain fami…
GO:0060548	negative regulation of cell death	1.56e-07	1.66e-05	1.92	66	[TIMP1 - timp metallopeptidase inhibitor 1, LGMN - legumain, CAPN3 - calpain 3, (p94), PSAP - prosaposin, RBCK1 - ranbp-type and c3hc4-type zinc finger containing 1, CLEC5A - c-type lectin domain family 5, member a, VPS35 - vacuolar protein sorting 35 homolog (s. cerevisiae), NRP1 - neuropilin 1, RPL10 - ribosomal protein l10, IDO1 - indoleamine 2,3-dioxygenase 1, SLC46A2 - solute carrier family …
GO:0048585	negative regulation of response to stimulus	1.67e-07	1.77e-05	1.66	98	[DHX58 - dexh (asp-glu-x-his) box polypeptide 58, LGMN - legumain, PSAP - prosaposin, TICAM1 - toll-like receptor adaptor molecule 1, NRP1 - neuropilin 1, BST2 - bone marrow stromal cell antigen 2, LDLR - low density lipoprotein receptor, FOXP3 - forkhead box p3, PYCARD - pyd and card domain containing, DHRS3 - dehydrogenase/reductase (sdr family) member 3, P2RX7 - purinergic receptor p2x, ligand…
GO:0005774	vacuolar membrane	4.16e-07	1.85e-05	2.39	38	[NEU1 - sialidase 1 (lysosomal sialidase), AP1S3 - adaptor-related protein complex 1, sigma 3 subunit, AP2A1 - adaptor-related protein complex 2, alpha 1 subunit, FLOT1 - flotillin 1, MREG - melanoregulin, DTX3L - deltex 3-like (drosophila), PSAP - prosaposin, VPS35 - vacuolar protein sorting 35 homolog (s. cerevisiae), TMEM173 - transmembrane protein 173, LDLR - low density lipoprotein receptor,…
GO:1903901	negative regulation of viral life cycle	1.92e-07	1.98e-05	4.88	15	[RSAD2 - radical s-adenosyl methionine domain containing 2, IFITM3 - interferon induced transmembrane protein 3, TNIP1 - tnfaip3 interacting protein 1, OASL - 2'-5'-oligoadenylate synthetase-like, ISG20 - interferon stimulated exonuclease gene 20kda, TRIM21 - tripartite motif containing 21, PLSCR1 - phospholipid scramblase 1, BST2 - bone marrow stromal cell antigen 2, TRIM26 - tripartite motif co…
GO:0042036	negative regulation of cytokine biosynthetic process	1.91e-07	1.99e-05	7.64	10	[GHSR - growth hormone secretagogue receptor, BCL3 - b-cell cll/lymphoma 3, NLRP12 - nlr family, pyrin domain containing 12, TYROBP - tyro protein tyrosine kinase binding protein, NMI - n-myc (and stat) interactor, FOXP3 - forkhead box p3, NFKB1 - nuclear factor of kappa light polypeptide gene enhancer in b-cells 1, SIGIRR - single immunoglobulin and toll-interleukin 1 receptor (tir) domain, IL6 …
GO:0032660	regulation of interleukin-17 production	1.91e-07	2.01e-05	7.64	10	[IL23A - interleukin 23, alpha subunit p19, ARG2 - arginase 2, SLAMF6 - slam family member 6, IL18 - interleukin 18 (interferon-gamma-inducing factor), IL15 - interleukin 15, MYD88 - myeloid differentiation primary response 88, TLR4 - toll-like receptor 4, FOXP3 - forkhead box p3, SPHK1 - sphingosine kinase 1, IL6 - interleukin 6 (interferon, beta 2)]
GO:0050715	positive regulation of cytokine secretion	2.08e-07	2.13e-05	4.11	18	[CSF1R - colony stimulating factor 1 receptor, FFAR2 - free fatty acid receptor 2, P2RX7 - purinergic receptor p2x, ligand-gated ion channel, 7, IL1RAP - interleukin 1 receptor accessory protein, AIF1 - allograft inflammatory factor 1, CLEC5A - c-type lectin domain family 5, member a, CD274 - cd274 molecule, IL1A - interleukin 1, alpha, IRF3 - interferon regulatory factor 3, NLRP12 - nlr family, …
GO:1902531	regulation of intracellular signal transduction	2.26e-07	2.3e-05	1.59	111	[IL18 - interleukin 18 (interferon-gamma-inducing factor), DHX58 - dexh (asp-glu-x-his) box polypeptide 58, IL15 - interleukin 15, FN1 - fibronectin 1, DDX60 - dead (asp-glu-ala-asp) box polypeptide 60, PSAP - prosaposin, ABCA1 - atp-binding cassette, sub-family a (abc1), member 1, RBCK1 - ranbp-type and c3hc4-type zinc finger containing 1, TICAM1 - toll-like receptor adaptor molecule 1, TMEM106A…
GO:0051047	positive regulation of secretion	2.73e-07	2.77e-05	2.59	34	[FFAR2 - free fatty acid receptor 2, CLEC5A - c-type lectin domain family 5, member a, CD274 - cd274 molecule, VPS35 - vacuolar protein sorting 35 homolog (s. cerevisiae), TNFRSF4 - tumor necrosis factor receptor superfamily, member 4, CD14 - cd14 molecule, TLR2 - toll-like receptor 2, TLR4 - toll-like receptor 4, TLR8 - toll-like receptor 8, CASP1 - caspase 1, apoptosis-related cysteine peptidas…
GO:0044419	interspecies interaction between organisms	2.83e-07	2.84e-05	1.91	64	[AP2A1 - adaptor-related protein complex 2, alpha 1 subunit, NAPEPLD - n-acyl phosphatidylethanolamine phospholipase d, DHX58 - dexh (asp-glu-x-his) box polypeptide 58, RPL22 - ribosomal protein l22, FN1 - fibronectin 1, CLEC5A - c-type lectin domain family 5, member a, TICAM1 - toll-like receptor adaptor molecule 1, RBCK1 - ranbp-type and c3hc4-type zinc finger containing 1, VPS35 - vacuolar pro…
GO:0060759	regulation of response to cytokine stimulus	2.89e-07	2.88e-05	3.22	24	[SOCS3 - suppressor of cytokine signaling 3, STAT1 - signal transducer and activator of transcription 1, 91kda, SPHK1 - sphingosine kinase 1, ADAM17 - adam metallopeptidase domain 17, ZBP1 - z-dna binding protein 1, RBCK1 - ranbp-type and c3hc4-type zinc finger containing 1, KLF4 - kruppel-like factor 4 (gut), IKBKB - inhibitor of kappa light polypeptide gene enhancer in b-cells, kinase beta, ADA…
GO:0044432	endoplasmic reticulum part	6.7e-07	2.9e-05	1.72	81	[TIMP1 - timp metallopeptidase inhibitor 1, FN1 - fibronectin 1, UNC93B1 - unc-93 homolog b1 (c. elegans), NCEH1 - neutral cholesterol ester hydrolase 1, PDIA4 - protein disulfide isomerase family a, member 4, EBI3 - epstein-barr virus induced 3, ABCA1 - atp-binding cassette, sub-family a (abc1), member 1, RNF121 - ring finger protein 121, PDIA5 - protein disulfide isomerase family a, member 5, I…
GO:0032653	regulation of interleukin-10 production	3.62e-07	3.59e-05	5.86	12	[IL23A - interleukin 23, alpha subunit p19, BCL3 - b-cell cll/lymphoma 3, IDO1 - indoleamine 2,3-dioxygenase 1, TYROBP - tyro protein tyrosine kinase binding protein, TLR2 - toll-like receptor 2, TLR4 - toll-like receptor 4, FOXP3 - forkhead box p3, CLEC7A - c-type lectin domain family 7, member a, TIGIT - t cell immunoreceptor with ig and itim domains, PDCD1LG2 - programmed cell death 1 ligand 2…
GO:0042102	positive regulation of T cell proliferation	3.69e-07	3.6e-05	4.4	16	[IL18 - interleukin 18 (interferon-gamma-inducing factor), IL15 - interleukin 15, EBI3 - epstein-barr virus induced 3, STAT5B - signal transducer and activator of transcription 5b, AIF1 - allograft inflammatory factor 1, CD274 - cd274 molecule, IL23A - interleukin 23, alpha subunit p19, ANXA1 - annexin a1, VCAM1 - vascular cell adhesion molecule 1, ZAP70 - zeta-chain (tcr) associated protein kina…
GO:0048519	negative regulation of biological process	3.68e-07	3.62e-05	1.3	238	[DHX58 - dexh (asp-glu-x-his) box polypeptide 58, ABCA1 - atp-binding cassette, sub-family a (abc1), member 1, CLEC5A - c-type lectin domain family 5, member a, CD274 - cd274 molecule, TICAM1 - toll-like receptor adaptor molecule 1, NRP1 - neuropilin 1, BST2 - bone marrow stromal cell antigen 2, LDLR - low density lipoprotein receptor, ORMDL2 - orm1-like 2 (s. cerevisiae), PML - promyelocytic leu…
GO:0002694	regulation of leukocyte activation	4.04e-07	3.91e-05	2.2	45	[IL18 - interleukin 18 (interferon-gamma-inducing factor), IL15 - interleukin 15, TYROBP - tyro protein tyrosine kinase binding protein, CLEC7A - c-type lectin domain family 7, member a, EBI3 - epstein-barr virus induced 3, SPHK1 - sphingosine kinase 1, STAT5B - signal transducer and activator of transcription 5b, HLX - h2.0-like homeobox, CD274 - cd274 molecule, TICAM1 - toll-like receptor adapt…
GO:0050865	regulation of cell activation	4.14e-07	3.99e-05	2.16	47	[IL18 - interleukin 18 (interferon-gamma-inducing factor), IL15 - interleukin 15, CAPN3 - calpain 3, (p94), TYROBP - tyro protein tyrosine kinase binding protein, CLEC7A - c-type lectin domain family 7, member a, EBI3 - epstein-barr virus induced 3, SPHK1 - sphingosine kinase 1, STAT5B - signal transducer and activator of transcription 5b, TICAM1 - toll-like receptor adaptor molecule 1, CD274 - c…
GO:0071396	cellular response to lipid	4.21e-07	4.02e-05	2.5	35	[ICAM1 - intercellular adhesion molecule 1, FFAR2 - free fatty acid receptor 2, IL15 - interleukin 15, MYD88 - myeloid differentiation primary response 88, ABCA1 - atp-binding cassette, sub-family a (abc1), member 1, TICAM1 - toll-like receptor adaptor molecule 1, CD274 - cd274 molecule, LDLR - low density lipoprotein receptor, CD14 - cd14 molecule, CD180 - cd180 molecule, TLR4 - toll-like recept…
GO:0051094	positive regulation of developmental process	4.62e-07	4.38e-05	1.74	80	[AP2A1 - adaptor-related protein complex 2, alpha 1 subunit, IL18 - interleukin 18 (interferon-gamma-inducing factor), NAPEPLD - n-acyl phosphatidylethanolamine phospholipase d, IL15 - interleukin 15, FN1 - fibronectin 1, CAPN3 - calpain 3, (p94), CD274 - cd274 molecule, HLX - h2.0-like homeobox, IL23A - interleukin 23, alpha subunit p19, VPS35 - vacuolar protein sorting 35 homolog (s. cerevisiae…
GO:0048525	negative regulation of viral process	4.64e-07	4.38e-05	4.33	16	[RSAD2 - radical s-adenosyl methionine domain containing 2, IFITM3 - interferon induced transmembrane protein 3, TNIP1 - tnfaip3 interacting protein 1, OASL - 2'-5'-oligoadenylate synthetase-like, ISG20 - interferon stimulated exonuclease gene 20kda, STAT1 - signal transducer and activator of transcription 1, 91kda, TRIM21 - tripartite motif containing 21, PLSCR1 - phospholipid scramblase 1, BST2…
GO:0051251	positive regulation of lymphocyte activation	4.74e-07	4.44e-05	2.72	30	[IL18 - interleukin 18 (interferon-gamma-inducing factor), IL15 - interleukin 15, TYROBP - tyro protein tyrosine kinase binding protein, CLEC7A - c-type lectin domain family 7, member a, EBI3 - epstein-barr virus induced 3, STAT5B - signal transducer and activator of transcription 5b, HLX - h2.0-like homeobox, TICAM1 - toll-like receptor adaptor molecule 1, CD274 - cd274 molecule, TNFRSF4 - tumor…
GO:0030545	receptor regulator activity	3.5e-08	4.59e-05	3.2	28	[TIMP1 - timp metallopeptidase inhibitor 1, LRPAP1 - low density lipoprotein receptor-related protein associated protein 1, IL18 - interleukin 18 (interferon-gamma-inducing factor), IL15 - interleukin 15, EBI3 - epstein-barr virus induced 3, IL23A - interleukin 23, alpha subunit p19, SEMA4A - sema domain, immunoglobulin domain (ig), transmembrane domain (tm) and short cytoplasmic domain, (semapho…
GO:0051179	localization	5.4e-07	5.02e-05	1.31	223	[LGALS3BP - lectin, galactoside-binding, soluble, 3 binding protein, UNC93B1 - unc-93 homolog b1 (c. elegans), PDIA4 - protein disulfide isomerase family a, member 4, ABCA1 - atp-binding cassette, sub-family a (abc1), member 1, CD274 - cd274 molecule, CLEC5A - c-type lectin domain family 5, member a, NRP1 - neuropilin 1, BST2 - bone marrow stromal cell antigen 2, LDLR - low density lipoprotein re…
GO:0034383	low-density lipoprotein particle clearance	5.58e-07	5.15e-05	7.91	9	[DGAT2 - diacylglycerol o-acyltransferase 2, AP2A1 - adaptor-related protein complex 2, alpha 1 subunit, LDLR - low density lipoprotein receptor, SOAT1 - sterol o-acyltransferase 1, HMOX1 - heme oxygenase (decycling) 1, AP2S1 - adaptor-related protein complex 2, sigma 1 subunit, LDLRAP1 - low density lipoprotein receptor adaptor protein 1, NCEH1 - neutral cholesterol ester hydrolase 1, EHD1 - eh-…
GO:0050789	regulation of biological process	5.67e-07	5.2e-05	1.15	408	[LGALS3BP - lectin, galactoside-binding, soluble, 3 binding protein, AAMP - angio-associated, migratory cell protein, DDX60 - dead (asp-glu-ala-asp) box polypeptide 60, PDIA4 - protein disulfide isomerase family a, member 4, ABCA1 - atp-binding cassette, sub-family a (abc1), member 1, CLEC5A - c-type lectin domain family 5, member a, PDIA5 - protein disulfide isomerase family a, member 5, LDLR - …
GO:0051235	maintenance of location	5.74e-07	5.2e-05	3.42	21	[PKD2 - polycystic kidney disease 2 (autosomal dominant), FFAR2 - free fatty acid receptor 2, GAA - glucosidase, alpha; acid, PLIN5 - perilipin 5, NFKBIA - nuclear factor of kappa light polypeptide gene enhancer in b-cells inhibitor, alpha, EPB41L3 - erythrocyte membrane protein band 4.1-like 3, SRGN - serglycin, STAT5B - signal transducer and activator of transcription 5b, S100A8 - s100 calcium …
GO:0032479	regulation of type I interferon production	5.74e-07	5.23e-05	3.42	21	[FLOT1 - flotillin 1, DHX58 - dexh (asp-glu-x-his) box polypeptide 58, MYD88 - myeloid differentiation primary response 88, UBE2L6 - ubiquitin-conjugating enzyme e2l 6, NFKB2 - nuclear factor of kappa light polypeptide gene enhancer in b-cells 2 (p49/p100), STAT1 - signal transducer and activator of transcription 1, 91kda, TRIM21 - tripartite motif containing 21, NFKB1 - nuclear factor of kappa l…
GO:0002699	positive regulation of immune effector process	6.23e-07	5.61e-05	3.01	25	[FFAR2 - free fatty acid receptor 2, IL18 - interleukin 18 (interferon-gamma-inducing factor), DHX58 - dexh (asp-glu-x-his) box polypeptide 58, DDX60 - dead (asp-glu-ala-asp) box polypeptide 60, STAT5B - signal transducer and activator of transcription 5b, TICAM1 - toll-like receptor adaptor molecule 1, HLX - h2.0-like homeobox, B2M - beta-2-microglobulin, IL23A - interleukin 23, alpha subunit p1…
GO:0043066	negative regulation of apoptotic process	6.27e-07	5.61e-05	1.93	59	[TIMP1 - timp metallopeptidase inhibitor 1, LGMN - legumain, CAPN3 - calpain 3, (p94), CLEC5A - c-type lectin domain family 5, member a, NRP1 - neuropilin 1, RPL10 - ribosomal protein l10, IDO1 - indoleamine 2,3-dioxygenase 1, SLC46A2 - solute carrier family 46, member 2, CTSH - cathepsin h, MT3 - metallothionein 3, NFKBIA - nuclear factor of kappa light polypeptide gene enhancer in b-cells inhib…
GO:0043069	negative regulation of programmed cell death	6.37e-07	5.66e-05	1.92	60	[TIMP1 - timp metallopeptidase inhibitor 1, LGMN - legumain, CAPN3 - calpain 3, (p94), CLEC5A - c-type lectin domain family 5, member a, RBCK1 - ranbp-type and c3hc4-type zinc finger containing 1, NRP1 - neuropilin 1, RPL10 - ribosomal protein l10, IDO1 - indoleamine 2,3-dioxygenase 1, SLC46A2 - solute carrier family 46, member 2, CTSH - cathepsin h, MT3 - metallothionein 3, NFKBIA - nuclear fact…
GO:0005102	signaling receptor binding	3.15e-08	6.21e-05	1.84	81	[AP2A1 - adaptor-related protein complex 2, alpha 1 subunit, TIMP1 - timp metallopeptidase inhibitor 1, IL18 - interleukin 18 (interferon-gamma-inducing factor), IL15 - interleukin 15, FN1 - fibronectin 1, OASL - 2'-5'-oligoadenylate synthetase-like, UNC93B1 - unc-93 homolog b1 (c. elegans), PSAP - prosaposin, EGFL7 - egf-like-domain, multiple 7, EBI3 - epstein-barr virus induced 3, ABCA1 - atp-b…
GO:1903532	positive regulation of secretion by cell	7.27e-07	6.38e-05	2.57	32	[FFAR2 - free fatty acid receptor 2, CD274 - cd274 molecule, CLEC5A - c-type lectin domain family 5, member a, VPS35 - vacuolar protein sorting 35 homolog (s. cerevisiae), TNFRSF4 - tumor necrosis factor receptor superfamily, member 4, CD14 - cd14 molecule, TLR2 - toll-like receptor 2, TLR4 - toll-like receptor 4, TLR8 - toll-like receptor 8, CASP1 - caspase 1, apoptosis-related cysteine peptidas…
GO:0032481	positive regulation of type I interferon production	7.24e-07	6.39e-05	4.2	16	[FLOT1 - flotillin 1, DHX58 - dexh (asp-glu-x-his) box polypeptide 58, MYD88 - myeloid differentiation primary response 88, NFKB2 - nuclear factor of kappa light polypeptide gene enhancer in b-cells 2 (p49/p100), STAT1 - signal transducer and activator of transcription 1, 91kda, NFKB1 - nuclear factor of kappa light polypeptide gene enhancer in b-cells 1, ZBP1 - z-dna binding protein 1, TICAM1 - …
GO:0044093	positive regulation of molecular function	7.38e-07	6.43e-05	1.58	105	[IL18 - interleukin 18 (interferon-gamma-inducing factor), LGMN - legumain, FN1 - fibronectin 1, DTX3L - deltex 3-like (drosophila), PSAP - prosaposin, RBCK1 - ranbp-type and c3hc4-type zinc finger containing 1, TICAM1 - toll-like receptor adaptor molecule 1, NRP1 - neuropilin 1, TMEM173 - transmembrane protein 173, TRIM26 - tripartite motif containing 26, PML - promyelocytic leukemia, AGRN - agr…
GO:0052547	regulation of peptidase activity	7.53e-07	6.52e-05	2.48	34	[CST6 - cystatin e/m, TIMP1 - timp metallopeptidase inhibitor 1, PSME1 - proteasome (prosome, macropain) activator subunit 1 (pa28 alpha), CSTB - cystatin b (stefin b), LGMN - legumain, PSME2 - proteasome (prosome, macropain) activator subunit 2 (pa28 beta), FN1 - fibronectin 1, CLEC7A - c-type lectin domain family 7, member a, GPX1 - glutathione peroxidase 1, BST2 - bone marrow stromal cell anti…
GO:0048018	receptor ligand activity	1.68e-08	6.61e-05	3.39	27	[TIMP1 - timp metallopeptidase inhibitor 1, IL18 - interleukin 18 (interferon-gamma-inducing factor), IL15 - interleukin 15, EBI3 - epstein-barr virus induced 3, SEMA4A - sema domain, immunoglobulin domain (ig), transmembrane domain (tm) and short cytoplasmic domain, (semaphorin) 4a, IL23A - interleukin 23, alpha subunit p19, JAG1 - jagged 1, GRN - granulin, GMFG - glia maturation factor, gamma, …
GO:0050728	negative regulation of inflammatory response	1e-06	8.6e-05	3.72	18	[GBA - glucosidase, beta, acid, METRNL - meteorin, glial cell differentiation regulator-like, SOCS3 - suppressor of cytokine signaling 3, NFKB1 - nuclear factor of kappa light polypeptide gene enhancer in b-cells 1, GPX1 - glutathione peroxidase 1, KLF4 - kruppel-like factor 4 (gut), VPS35 - vacuolar protein sorting 35 homolog (s. cerevisiae), GHSR - growth hormone secretagogue receptor, LDLR - l…
GO:0046427	positive regulation of JAK-STAT cascade	1.02e-06	8.68e-05	4.97	13	[CSF1R - colony stimulating factor 1 receptor, IL18 - interleukin 18 (interferon-gamma-inducing factor), IL15 - interleukin 15, SOCS3 - suppressor of cytokine signaling 3, IL23A - interleukin 23, alpha subunit p19, IL10RB - interleukin 10 receptor, beta, IL10RA - interleukin 10 receptor, alpha, TNFRSF1A - tumor necrosis factor receptor superfamily, member 1a, PARP14 - poly (adp-ribose) polymerase…
GO:0051050	positive regulation of transport	1.04e-06	8.87e-05	1.88	61	[AP2A1 - adaptor-related protein complex 2, alpha 1 subunit, IL15 - interleukin 15, CAPN3 - calpain 3, (p94), ABCA1 - atp-binding cassette, sub-family a (abc1), member 1, CLEC5A - c-type lectin domain family 5, member a, CD274 - cd274 molecule, VPS35 - vacuolar protein sorting 35 homolog (s. cerevisiae), SLC11A1 - solute carrier family 11 (proton-coupled divalent metal ion transporter), member 1,…
GO:0071345	cellular response to cytokine stimulus	1.07e-06	8.95e-05	2.28	39	[ICAM1 - intercellular adhesion molecule 1, STAT1 - signal transducer and activator of transcription 1, 91kda, KLF2 - kruppel-like factor 2 (lung), SNX10 - sorting nexin 10, IFNAR1 - interferon (alpha, beta and omega) receptor 1, TMEM173 - transmembrane protein 173, PML - promyelocytic leukemia, TLR2 - toll-like receptor 2, TLR4 - toll-like receptor 4, RAB7B - rab7b, member ras oncogene family, L…
GO:0050794	regulation of cellular process	1.06e-06	8.99e-05	1.16	389	[LGALS3BP - lectin, galactoside-binding, soluble, 3 binding protein, AAMP - angio-associated, migratory cell protein, DDX60 - dead (asp-glu-ala-asp) box polypeptide 60, PDIA4 - protein disulfide isomerase family a, member 4, ABCA1 - atp-binding cassette, sub-family a (abc1), member 1, CLEC5A - c-type lectin domain family 5, member a, PDIA5 - protein disulfide isomerase family a, member 5, LDLR - …
GO:0051716	cellular response to stimulus	1.11e-06	9.24e-05	1.41	156	[IL18 - interleukin 18 (interferon-gamma-inducing factor), IL15 - interleukin 15, LGMN - legumain, DTX3L - deltex 3-like (drosophila), PDIA4 - protein disulfide isomerase family a, member 4, PSAP - prosaposin, ABCA1 - atp-binding cassette, sub-family a (abc1), member 1, CD274 - cd274 molecule, TICAM1 - toll-like receptor adaptor molecule 1, PDIA5 - protein disulfide isomerase family a, member 5, …
GO:0050900	leukocyte migration	1.17e-06	9.73e-05	2.78	27	[ICAM1 - intercellular adhesion molecule 1, CCR6 - chemokine (c-c motif) receptor 6, FFAR2 - free fatty acid receptor 2, FN1 - fibronectin 1, STAT5B - signal transducer and activator of transcription 5b, SLC16A3 - solute carrier family 16 (monocarboxylate transporter), member 3, CCR1 - chemokine (c-c motif) receptor 1, GRB2 - growth factor receptor-bound protein 2, CNR2 - cannabinoid receptor 2 (…
GO:0030659	cytoplasmic vesicle membrane	2.48e-06	0.000105	2.01	48	[AP1S3 - adaptor-related protein complex 1, sigma 3 subunit, AP2A1 - adaptor-related protein complex 2, alpha 1 subunit, PKD2 - polycystic kidney disease 2 (autosomal dominant), MREG - melanoregulin, TYROBP - tyro protein tyrosine kinase binding protein, PSAP - prosaposin, SEC23IP - sec23 interacting protein, CLEC5A - c-type lectin domain family 5, member a, B2M - beta-2-microglobulin, ENTPD7 - e…
GO:1903555	regulation of tumor necrosis factor superfamily cytokine production	1.28e-06	0.000106	3.38	20	[TYROBP - tyro protein tyrosine kinase binding protein, MAPKAPK2 - mitogen-activated protein kinase-activated protein kinase 2, CLEC7A - c-type lectin domain family 7, member a, TICAM1 - toll-like receptor adaptor molecule 1, CD274 - cd274 molecule, ARHGEF2 - rho/rac guanine nucleotide exchange factor (gef) 2, GHSR - growth hormone secretagogue receptor, IL23A - interleukin 23, alpha subunit p19,…
GO:0045071	negative regulation of viral genome replication	1.31e-06	0.000107	5.27	12	[RSAD2 - radical s-adenosyl methionine domain containing 2, IFITM3 - interferon induced transmembrane protein 3, BST2 - bone marrow stromal cell antigen 2, TNIP1 - tnfaip3 interacting protein 1, MX1 - myxovirus (influenza virus) resistance 1, interferon-inducible protein p78 (mouse), OASL - 2'-5'-oligoadenylate synthetase-like, ISG20 - interferon stimulated exonuclease gene 20kda, OAS1 - 2'-5'-ol…
GO:0002250	adaptive immune response	1.33e-06	0.000109	2.97	24	[CTSH - cathepsin h, LAT2 - linker for activation of t cells family, member 2, IL18 - interleukin 18 (interferon-gamma-inducing factor), NFKB2 - nuclear factor of kappa light polypeptide gene enhancer in b-cells 2 (p49/p100), UNC93B1 - unc-93 homolog b1 (c. elegans), CTSS - cathepsin s, EBI3 - epstein-barr virus induced 3, ADAM17 - adam metallopeptidase domain 17, CD274 - cd274 molecule, SLC11A1 …
GO:1903557	positive regulation of tumor necrosis factor superfamily cytokine production	1.35e-06	0.000109	4.25	15	[TYROBP - tyro protein tyrosine kinase binding protein, MAPKAPK2 - mitogen-activated protein kinase-activated protein kinase 2, CLEC7A - c-type lectin domain family 7, member a, ARHGEF2 - rho/rac guanine nucleotide exchange factor (gef) 2, TICAM1 - toll-like receptor adaptor molecule 1, IL23A - interleukin 23, alpha subunit p19, CD14 - cd14 molecule, TLR2 - toll-like receptor 2, TLR4 - toll-like …
GO:0051249	regulation of lymphocyte activation	1.49e-06	0.00012	2.25	39	[IL18 - interleukin 18 (interferon-gamma-inducing factor), IL15 - interleukin 15, TYROBP - tyro protein tyrosine kinase binding protein, CLEC7A - c-type lectin domain family 7, member a, EBI3 - epstein-barr virus induced 3, STAT5B - signal transducer and activator of transcription 5b, HLX - h2.0-like homeobox, TICAM1 - toll-like receptor adaptor molecule 1, CD274 - cd274 molecule, IL23A - interle…
GO:2000377	regulation of reactive oxygen species metabolic process	1.59e-06	0.000126	3.12	22	[PKD2 - polycystic kidney disease 2 (autosomal dominant), ICAM1 - intercellular adhesion molecule 1, MT3 - metallothionein 3, TYROBP - tyro protein tyrosine kinase binding protein, PLIN5 - perilipin 5, CFLAR - casp8 and fadd-like apoptosis regulator, CLEC7A - c-type lectin domain family 7, member a, KLF2 - kruppel-like factor 2 (lung), AIF1 - allograft inflammatory factor 1, TICAM1 - toll-like re…
GO:0051049	regulation of transport	1.59e-06	0.000127	1.61	94	[AP2A1 - adaptor-related protein complex 2, alpha 1 subunit, IL15 - interleukin 15, FN1 - fibronectin 1, CAPN3 - calpain 3, (p94), SRGN - serglycin, ABCA1 - atp-binding cassette, sub-family a (abc1), member 1, CD274 - cd274 molecule, CLEC5A - c-type lectin domain family 5, member a, VPS35 - vacuolar protein sorting 35 homolog (s. cerevisiae), SLC11A1 - solute carrier family 11 (proton-coupled div…
GO:1904894	positive regulation of STAT cascade	1.73e-06	0.000137	4.76	13	[CSF1R - colony stimulating factor 1 receptor, IL18 - interleukin 18 (interferon-gamma-inducing factor), IL15 - interleukin 15, SOCS3 - suppressor of cytokine signaling 3, IL23A - interleukin 23, alpha subunit p19, IL10RB - interleukin 10 receptor, beta, IL10RA - interleukin 10 receptor, alpha, TNFRSF1A - tumor necrosis factor receptor superfamily, member 1a, PARP14 - poly (adp-ribose) polymerase…
GO:0012506	vesicle membrane	3.35e-06	0.000138	1.97	49	[AP2A1 - adaptor-related protein complex 2, alpha 1 subunit, PSAP - prosaposin, CLEC5A - c-type lectin domain family 5, member a, SLC11A1 - solute carrier family 11 (proton-coupled divalent metal ion transporter), member 1, ENTPD7 - ectonucleoside triphosphate diphosphohydrolase 7, LDLR - low density lipoprotein receptor, BST2 - bone marrow stromal cell antigen 2, TMEM173 - transmembrane protein …
GO:1903530	regulation of secretion by cell	1.77e-06	0.000139	2.03	48	[RALB - v-ral simian leukemia viral oncogene homolog b, FFAR2 - free fatty acid receptor 2, FN1 - fibronectin 1, SRGN - serglycin, CLEC5A - c-type lectin domain family 5, member a, CD274 - cd274 molecule, TNFRSF4 - tumor necrosis factor receptor superfamily, member 4, VPS35 - vacuolar protein sorting 35 homolog (s. cerevisiae), ARG2 - arginase 2, CD14 - cd14 molecule, PML - promyelocytic leukemia…
GO:1903900	regulation of viral life cycle	2.07e-06	0.000162	3.41	19	[STOM - stomatin, RSAD2 - radical s-adenosyl methionine domain containing 2, IFITM3 - interferon induced transmembrane protein 3, TNIP1 - tnfaip3 interacting protein 1, OASL - 2'-5'-oligoadenylate synthetase-like, P4HB - prolyl 4-hydroxylase, beta polypeptide, ISG20 - interferon stimulated exonuclease gene 20kda, TRIM21 - tripartite motif containing 21, PLSCR1 - phospholipid scramblase 1, ADAR - …
GO:0032268	regulation of cellular protein metabolic process	2.23e-06	0.000174	1.44	137	[IL18 - interleukin 18 (interferon-gamma-inducing factor), IL15 - interleukin 15, LGMN - legumain, FN1 - fibronectin 1, DTX3L - deltex 3-like (drosophila), PSAP - prosaposin, TICAM1 - toll-like receptor adaptor molecule 1, TMEM106A - transmembrane protein 106a, NRP1 - neuropilin 1, LDLR - low density lipoprotein receptor, BST2 - bone marrow stromal cell antigen 2, PML - promyelocytic leukemia, SP…
GO:0032879	regulation of localization	2.38e-06	0.000184	1.45	132	[LGMN - legumain, IL15 - interleukin 15, FN1 - fibronectin 1, DTX3L - deltex 3-like (drosophila), AAMP - angio-associated, migratory cell protein, ABCA1 - atp-binding cassette, sub-family a (abc1), member 1, CD274 - cd274 molecule, CLEC5A - c-type lectin domain family 5, member a, NRP1 - neuropilin 1, BST2 - bone marrow stromal cell antigen 2, PML - promyelocytic leukemia, TLR8 - toll-like recept…
GO:0050867	positive regulation of cell activation	2.63e-06	0.000202	2.43	32	[IL18 - interleukin 18 (interferon-gamma-inducing factor), IL15 - interleukin 15, CAPN3 - calpain 3, (p94), TYROBP - tyro protein tyrosine kinase binding protein, CLEC7A - c-type lectin domain family 7, member a, EBI3 - epstein-barr virus induced 3, STAT5B - signal transducer and activator of transcription 5b, HLX - h2.0-like homeobox, CD274 - cd274 molecule, TICAM1 - toll-like receptor adaptor m…
GO:0032649	regulation of interferon-gamma production	3.14e-06	0.00024	4	15	[IL18 - interleukin 18 (interferon-gamma-inducing factor), CLEC7A - c-type lectin domain family 7, member a, EBI3 - epstein-barr virus induced 3, CD274 - cd274 molecule, IL23A - interleukin 23, alpha subunit p19, SLC11A1 - solute carrier family 11 (proton-coupled divalent metal ion transporter), member 1, BCL3 - b-cell cll/lymphoma 3, SLAMF6 - slam family member 6, CD14 - cd14 molecule, IL27 - in…
GO:0006897	endocytosis	3.46e-06	0.000263	2.23	37	[AP2A1 - adaptor-related protein complex 2, alpha 1 subunit, LGALS3BP - lectin, galactoside-binding, soluble, 3 binding protein, MICALL1 - mical-like 1, MYD88 - myeloid differentiation primary response 88, TYROBP - tyro protein tyrosine kinase binding protein, FCHSD2 - fch and double sh3 domains 2, SIGLEC1 - sialic acid binding ig-like lectin 1, sialoadhesin, SNX10 - sorting nexin 10, SLC11A1 - s…
GO:0046425	regulation of JAK-STAT cascade	3.84e-06	0.000291	3.94	15	[CSF1R - colony stimulating factor 1 receptor, IL18 - interleukin 18 (interferon-gamma-inducing factor), IL15 - interleukin 15, SOCS3 - suppressor of cytokine signaling 3, IL23A - interleukin 23, alpha subunit p19, IL10RB - interleukin 10 receptor, beta, BCL3 - b-cell cll/lymphoma 3, LEPROT - leptin receptor overlapping transcript, IL10RA - interleukin 10 receptor, alpha, TNFRSF1A - tumor necrosi…
GO:0032740	positive regulation of interleukin-17 production	4.48e-06	0.000337	8.79	7	[IL23A - interleukin 23, alpha subunit p19, SLAMF6 - slam family member 6, IL18 - interleukin 18 (interferon-gamma-inducing factor), IL15 - interleukin 15, MYD88 - myeloid differentiation primary response 88, SPHK1 - sphingosine kinase 1, IL6 - interleukin 6 (interferon, beta 2)]
GO:0038023	signaling receptor activity	3.54e-07	0.000349	2.09	51	[EBI3 - epstein-barr virus induced 3, ABCA1 - atp-binding cassette, sub-family a (abc1), member 1, CD69 - cd69 molecule, NRP1 - neuropilin 1, IFNAR1 - interferon (alpha, beta and omega) receptor 1, TLR2 - toll-like receptor 2, TLR8 - toll-like receptor 8, TLR4 - toll-like receptor 4, IFNGR2 - interferon gamma receptor 2 (interferon gamma transducer 1), VDR - vitamin d (1,25- dihydroxyvitamin d3) …
GO:1903426	regulation of reactive oxygen species biosynthetic process	4.81e-06	0.000358	4.1	14	[PKD2 - polycystic kidney disease 2 (autosomal dominant), ICAM1 - intercellular adhesion molecule 1, CFLAR - casp8 and fadd-like apoptosis regulator, CLEC7A - c-type lectin domain family 7, member a, AIF1 - allograft inflammatory factor 1, KLF2 - kruppel-like factor 2 (lung), TICAM1 - toll-like receptor adaptor molecule 1, KLF4 - kruppel-like factor 4 (gut), ARG2 - arginase 2, RAC1 - ras-related …
GO:0032760	positive regulation of tumor necrosis factor production	4.81e-06	0.00036	4.1	14	[TYROBP - tyro protein tyrosine kinase binding protein, MAPKAPK2 - mitogen-activated protein kinase-activated protein kinase 2, CLEC7A - c-type lectin domain family 7, member a, TICAM1 - toll-like receptor adaptor molecule 1, ARHGEF2 - rho/rac guanine nucleotide exchange factor (gef) 2, IL23A - interleukin 23, alpha subunit p19, CD14 - cd14 molecule, TLR2 - toll-like receptor 2, TLR4 - toll-like …
GO:1904407	positive regulation of nitric oxide metabolic process	4.89e-06	0.000362	5.67	10	[TMEM106A - transmembrane protein 106a, ICAM1 - intercellular adhesion molecule 1, PKD2 - polycystic kidney disease 2 (autosomal dominant), PTGS2 - prostaglandin-endoperoxide synthase 2 (prostaglandin g/h synthase and cyclooxygenase), TLR4 - toll-like receptor 4, CLEC7A - c-type lectin domain family 7, member a, AIF1 - allograft inflammatory factor 1, KLF2 - kruppel-like factor 2 (lung), TICAM1 -…
GO:0046466	membrane lipid catabolic process	5.25e-06	0.000384	6.33	9	[NEU1 - sialidase 1 (lysosomal sialidase), GBA - glucosidase, beta, acid, HEXB - hexosaminidase b (beta polypeptide), PSAP - prosaposin, CYP1B1 - cytochrome p450, family 1, subfamily b, polypeptide 1, GM2A - gm2 ganglioside activator, SPHK1 - sphingosine kinase 1, ASAH1 - n-acylsphingosine amidohydrolase (acid ceramidase) 1, SMPD1 - sphingomyelin phosphodiesterase 1, acid lysosomal]
GO:0008150	biological_process	5.28e-06	0.000384	1.04	550	[LGALS3BP - lectin, galactoside-binding, soluble, 3 binding protein, DDX60 - dead (asp-glu-ala-asp) box polypeptide 60, AAMP - angio-associated, migratory cell protein, PDIA4 - protein disulfide isomerase family a, member 4, ABCA1 - atp-binding cassette, sub-family a (abc1), member 1, AHSP - alpha hemoglobin stabilizing protein, CLEC5A - c-type lectin domain family 5, member a, PDIA5 - protein di…
GO:0034381	plasma lipoprotein particle clearance	5.25e-06	0.000386	6.33	9	[DGAT2 - diacylglycerol o-acyltransferase 2, AP2A1 - adaptor-related protein complex 2, alpha 1 subunit, LDLR - low density lipoprotein receptor, SOAT1 - sterol o-acyltransferase 1, HMOX1 - heme oxygenase (decycling) 1, AP2S1 - adaptor-related protein complex 2, sigma 1 subunit, LDLRAP1 - low density lipoprotein receptor adaptor protein 1, NCEH1 - neutral cholesterol ester hydrolase 1, EHD1 - eh-…
GO:0005788	endoplasmic reticulum lumen	9.6e-06	0.000388	2.6	25	[TIMP1 - timp metallopeptidase inhibitor 1, LRPAP1 - low density lipoprotein receptor-related protein associated protein 1, FN1 - fibronectin 1, SHISA5 - shisa family member 5, PDIA4 - protein disulfide isomerase family a, member 4, EBI3 - epstein-barr virus induced 3, PDIA5 - protein disulfide isomerase family a, member 5, B2M - beta-2-microglobulin, IL23A - interleukin 23, alpha subunit p19, DN…
GO:1901222	regulation of NIK/NF-kappaB signaling	5.67e-06	0.000406	3.82	15	[TNFSF15 - tumor necrosis factor (ligand) superfamily, member 15, IL18 - interleukin 18 (interferon-gamma-inducing factor), NFKBIA - nuclear factor of kappa light polypeptide gene enhancer in b-cells inhibitor, alpha, SPHK1 - sphingosine kinase 1, RBCK1 - ranbp-type and c3hc4-type zinc finger containing 1, IL23A - interleukin 23, alpha subunit p19, NLRP12 - nlr family, pyrin domain containing 12,…
GO:1904892	regulation of STAT cascade	5.67e-06	0.000408	3.82	15	[CSF1R - colony stimulating factor 1 receptor, IL18 - interleukin 18 (interferon-gamma-inducing factor), IL15 - interleukin 15, SOCS3 - suppressor of cytokine signaling 3, IL23A - interleukin 23, alpha subunit p19, IL10RB - interleukin 10 receptor, beta, BCL3 - b-cell cll/lymphoma 3, LEPROT - leptin receptor overlapping transcript, IL10RA - interleukin 10 receptor, alpha, TNFRSF1A - tumor necrosi…
GO:0033256	I-kappaB/NF-kappaB complex	1.04e-05	0.000409	17.58	4	[BCL3 - b-cell cll/lymphoma 3, NFKB2 - nuclear factor of kappa light polypeptide gene enhancer in b-cells 2 (p49/p100), NFKBIA - nuclear factor of kappa light polypeptide gene enhancer in b-cells inhibitor, alpha, NFKB1 - nuclear factor of kappa light polypeptide gene enhancer in b-cells 1]
GO:0098657	import into cell	5.65e-06	0.00041	2.08	41	[AP2A1 - adaptor-related protein complex 2, alpha 1 subunit, LGALS3BP - lectin, galactoside-binding, soluble, 3 binding protein, MICALL1 - mical-like 1, MYD88 - myeloid differentiation primary response 88, TYROBP - tyro protein tyrosine kinase binding protein, FCHSD2 - fch and double sh3 domains 2, SNX10 - sorting nexin 10, SIGLEC1 - sialic acid binding ig-like lectin 1, sialoadhesin, SLC11A1 - s…
GO:0010008	endosome membrane	1.1e-05	0.000425	2.07	39	[AP2A1 - adaptor-related protein complex 2, alpha 1 subunit, NAPEPLD - n-acyl phosphatidylethanolamine phospholipase d, MREG - melanoregulin, MICALL1 - mical-like 1, MYD88 - myeloid differentiation primary response 88, DTX3L - deltex 3-like (drosophila), SPHK1 - sphingosine kinase 1, CD274 - cd274 molecule, TICAM1 - toll-like receptor adaptor molecule 1, FGD2 - fyve, rhogef and ph domain containi…
GO:0032729	positive regulation of interferon-gamma production	6.67e-06	0.000468	4.59	12	[IL23A - interleukin 23, alpha subunit p19, SLC11A1 - solute carrier family 11 (proton-coupled divalent metal ion transporter), member 1, BCL3 - b-cell cll/lymphoma 3, SLAMF6 - slam family member 6, IL18 - interleukin 18 (interferon-gamma-inducing factor), CD14 - cd14 molecule, IL27 - interleukin 27, TLR8 - toll-like receptor 8, TLR4 - toll-like receptor 4, CLEC7A - c-type lectin domain family 7,…
GO:1901701	cellular response to oxygen-containing compound	6.58e-06	0.000469	1.82	57	[IL15 - interleukin 15, LGMN - legumain, ABCA1 - atp-binding cassette, sub-family a (abc1), member 1, TICAM1 - toll-like receptor adaptor molecule 1, CD274 - cd274 molecule, LDLR - low density lipoprotein receptor, TLR2 - toll-like receptor 2, SPI1 - spleen focus forming virus (sffv) proviral integration oncogene, TLR4 - toll-like receptor 4, CASP1 - caspase 1, apoptosis-related cysteine peptidas…
GO:0032677	regulation of interleukin-8 production	6.67e-06	0.000471	4.59	12	[FFAR2 - free fatty acid receptor 2, BCL3 - b-cell cll/lymphoma 3, CD14 - cd14 molecule, MYD88 - myeloid differentiation primary response 88, ANXA1 - annexin a1, TLR2 - toll-like receptor 2, TLR4 - toll-like receptor 4, TLR8 - toll-like receptor 8, CLEC7A - c-type lectin domain family 7, member a, DDX58 - dead (asp-glu-ala-asp) box polypeptide 58, PYCARD - pyd and card domain containing, KLF4 - k…
GO:0002460	adaptive immune response based on somatic recombination of immune receptors built from immunoglobulin superfamily domains	6.67e-06	0.000473	4.59	12	[SLC11A1 - solute carrier family 11 (proton-coupled divalent metal ion transporter), member 1, CTSH - cathepsin h, BCL3 - b-cell cll/lymphoma 3, IL18 - interleukin 18 (interferon-gamma-inducing factor), JAG1 - jagged 1, IRF7 - interferon regulatory factor 7, NFKB2 - nuclear factor of kappa light polypeptide gene enhancer in b-cells 2 (p49/p100), TLR8 - toll-like receptor 8, TLR4 - toll-like recep…
GO:0045069	regulation of viral genome replication	6.84e-06	0.000478	3.77	15	[STOM - stomatin, RSAD2 - radical s-adenosyl methionine domain containing 2, IFITM3 - interferon induced transmembrane protein 3, TNIP1 - tnfaip3 interacting protein 1, OASL - 2'-5'-oligoadenylate synthetase-like, ISG20 - interferon stimulated exonuclease gene 20kda, PLSCR1 - phospholipid scramblase 1, ADAR - adenosine deaminase, rna-specific, BST2 - bone marrow stromal cell antigen 2, MX1 - myxo…
GO:0002230	positive regulation of defense response to virus by host	7.13e-06	0.000496	7.03	8	[IL23A - interleukin 23, alpha subunit p19, TMEM173 - transmembrane protein 173, DTX3L - deltex 3-like (drosophila), IL27 - interleukin 27, PARP9 - poly (adp-ribose) polymerase family, member 9, STAT1 - signal transducer and activator of transcription 1, 91kda, DDX58 - dead (asp-glu-ala-asp) box polypeptide 58, PYCARD - pyd and card domain containing]
GO:0007249	I-kappaB kinase/NF-kappaB signaling	7.26e-06	0.000502	4.23	13	[MAP3K14 - mitogen-activated protein kinase kinase kinase 14, NFKB2 - nuclear factor of kappa light polypeptide gene enhancer in b-cells 2 (p49/p100), NFKBIA - nuclear factor of kappa light polypeptide gene enhancer in b-cells inhibitor, alpha, NFKB1 - nuclear factor of kappa light polypeptide gene enhancer in b-cells 1, TICAM1 - toll-like receptor adaptor molecule 1, RBCK1 - ranbp-type and c3hc4…
GO:0050731	positive regulation of peptidyl-tyrosine phosphorylation	7.42e-06	0.000511	3.03	20	[CSF1R - colony stimulating factor 1 receptor, ICAM1 - intercellular adhesion molecule 1, IL18 - interleukin 18 (interferon-gamma-inducing factor), CSF3 - colony stimulating factor 3 (granulocyte), IL15 - interleukin 15, SOCS3 - suppressor of cytokine signaling 3, ADAM17 - adam metallopeptidase domain 17, ARHGEF2 - rho/rac guanine nucleotide exchange factor (gef) 2, IL23A - interleukin 23, alpha …
GO:1903037	regulation of leukocyte cell-cell adhesion	7.57e-06	0.000518	2.43	29	[ICAM1 - intercellular adhesion molecule 1, IL18 - interleukin 18 (interferon-gamma-inducing factor), IL15 - interleukin 15, EBI3 - epstein-barr virus induced 3, STAT5B - signal transducer and activator of transcription 5b, HLX - h2.0-like homeobox, CD274 - cd274 molecule, IL23A - interleukin 23, alpha subunit p19, CTLA4 - cytotoxic t-lymphocyte-associated protein 4, ARG2 - arginase 2, GRB2 - gro…
GO:0032102	negative regulation of response to external stimulus	8.34e-06	0.000568	2.46	28	[DHX58 - dexh (asp-glu-x-his) box polypeptide 58, GPX1 - glutathione peroxidase 1, VPS35 - vacuolar protein sorting 35 homolog (s. cerevisiae), SEMA4A - sema domain, immunoglobulin domain (ig), transmembrane domain (tm) and short cytoplasmic domain, (semaphorin) 4a, NRP1 - neuropilin 1, LDLR - low density lipoprotein receptor, ARG2 - arginase 2, GRN - granulin, FOXP3 - forkhead box p3, CNR2 - can…
GO:1901698	response to nitrogen compound	8.74e-06	0.00059	1.77	60	[TIMP1 - timp metallopeptidase inhibitor 1, LGMN - legumain, ABCA1 - atp-binding cassette, sub-family a (abc1), member 1, TICAM1 - toll-like receptor adaptor molecule 1, RNF121 - ring finger protein 121, LDLR - low density lipoprotein receptor, TMEM173 - transmembrane protein 173, JAG1 - jagged 1, TLR2 - toll-like receptor 2, TLR4 - toll-like receptor 4, BTG1 - b-cell translocation gene 1, anti-p…
GO:0042742	defense response to bacterium	8.71e-06	0.000591	3.52	16	[P2RX7 - purinergic receptor p2x, ligand-gated ion channel, 7, MYD88 - myeloid differentiation primary response 88, S100A8 - s100 calcium binding protein a8, ADAM17 - adam metallopeptidase domain 17, MPEG1 - macrophage expressed 1, IL23A - interleukin 23, alpha subunit p19, SLC11A1 - solute carrier family 11 (proton-coupled divalent metal ion transporter), member 1, BCL3 - b-cell cll/lymphoma 3, …
GO:0006898	receptor-mediated endocytosis	9.26e-06	0.000621	3.09	19	[AP2A1 - adaptor-related protein complex 2, alpha 1 subunit, SCARB2 - scavenger receptor class b, member 2, MICALL1 - mical-like 1, AP2S1 - adaptor-related protein complex 2, sigma 1 subunit, FCHSD2 - fch and double sh3 domains 2, LDLR - low density lipoprotein receptor, FCGR1A - fc fragment of igg, high affinity ia, receptor (cd64), GRB2 - growth factor receptor-bound protein 2, CD14 - cd14 mole…
GO:0008284	positive regulation of cell proliferation	9.34e-06	0.000624	1.83	54	[TIMP1 - timp metallopeptidase inhibitor 1, IL18 - interleukin 18 (interferon-gamma-inducing factor), LGMN - legumain, IL15 - interleukin 15, FN1 - fibronectin 1, EGFL7 - egf-like-domain, multiple 7, EBI3 - epstein-barr virus induced 3, CD274 - cd274 molecule, TICAM1 - toll-like receptor adaptor molecule 1, HLX - h2.0-like homeobox, IL23A - interleukin 23, alpha subunit p19, NRP1 - neuropilin 1, …
GO:0052548	regulation of endopeptidase activity	9.83e-06	0.00065	2.35	30	[CST6 - cystatin e/m, TIMP1 - timp metallopeptidase inhibitor 1, PSME1 - proteasome (prosome, macropain) activator subunit 1 (pa28 alpha), CSTB - cystatin b (stefin b), LGMN - legumain, PSME2 - proteasome (prosome, macropain) activator subunit 2 (pa28 beta), CLEC7A - c-type lectin domain family 7, member a, GPX1 - glutathione peroxidase 1, BST2 - bone marrow stromal cell antigen 2, PML - promyelo…
GO:0002696	positive regulation of leukocyte activation	9.83e-06	0.000653	2.35	30	[IL18 - interleukin 18 (interferon-gamma-inducing factor), IL15 - interleukin 15, TYROBP - tyro protein tyrosine kinase binding protein, CLEC7A - c-type lectin domain family 7, member a, EBI3 - epstein-barr virus induced 3, STAT5B - signal transducer and activator of transcription 5b, HLX - h2.0-like homeobox, TICAM1 - toll-like receptor adaptor molecule 1, CD274 - cd274 molecule, TNFRSF4 - tumor…
GO:0031401	positive regulation of protein modification process	1e-05	0.000658	1.66	72	[IL18 - interleukin 18 (interferon-gamma-inducing factor), IL15 - interleukin 15, PSAP - prosaposin, TICAM1 - toll-like receptor adaptor molecule 1, TMEM106A - transmembrane protein 106a, IL23A - interleukin 23, alpha subunit p19, SLC11A1 - solute carrier family 11 (proton-coupled divalent metal ion transporter), member 1, NRP1 - neuropilin 1, ACSL1 - acyl-coa synthetase long-chain family member …
GO:0032652	regulation of interleukin-1 production	1.08e-05	0.000702	4.4	12	[GHSR - growth hormone secretagogue receptor, ARG2 - arginase 2, NLRP12 - nlr family, pyrin domain containing 12, P2RX7 - purinergic receptor p2x, ligand-gated ion channel, 7, PML - promyelocytic leukemia, TYROBP - tyro protein tyrosine kinase binding protein, ANXA1 - annexin a1, TLR4 - toll-like receptor 4, TLR8 - toll-like receptor 8, CLEC7A - c-type lectin domain family 7, member a, CASP1 - ca…
GO:0050863	regulation of T cell activation	1.07e-05	0.000704	2.34	30	[IL18 - interleukin 18 (interferon-gamma-inducing factor), IL15 - interleukin 15, EBI3 - epstein-barr virus induced 3, STAT5B - signal transducer and activator of transcription 5b, HLX - h2.0-like homeobox, CD274 - cd274 molecule, IL23A - interleukin 23, alpha subunit p19, CTLA4 - cytotoxic t-lymphocyte-associated protein 4, ARG2 - arginase 2, GRB2 - growth factor receptor-bound protein 2, IDO1 -…
GO:0050691	regulation of defense response to virus by host	1.09e-05	0.000705	5.86	9	[IL23A - interleukin 23, alpha subunit p19, TMEM173 - transmembrane protein 173, IL15 - interleukin 15, DTX3L - deltex 3-like (drosophila), IL27 - interleukin 27, PARP9 - poly (adp-ribose) polymerase family, member 9, STAT1 - signal transducer and activator of transcription 1, 91kda, DDX58 - dead (asp-glu-ala-asp) box polypeptide 58, PYCARD - pyd and card domain containing]
GO:0008219	cell death	1.11e-05	0.000718	1.85	52	[EMP1 - epithelial membrane protein 1, BCL2L14 - bcl2-like 14 (apoptosis facilitator), CAPN3 - calpain 3, (p94), BMX - bmx non-receptor tyrosine kinase, NEK6 - nima-related kinase 6, GSDMA - gasdermin a, TICAM1 - toll-like receptor adaptor molecule 1, SPI1 - spleen focus forming virus (sffv) proviral integration oncogene, TLR2 - toll-like receptor 2, BCL2L15 - bcl2-like 15, TLR4 - toll-like recep…
GO:0012501	programmed cell death	1.17e-05	0.000753	1.87	50	[BCL2L14 - bcl2-like 14 (apoptosis facilitator), CAPN3 - calpain 3, (p94), BMX - bmx non-receptor tyrosine kinase, NEK6 - nima-related kinase 6, GSDMA - gasdermin a, TICAM1 - toll-like receptor adaptor molecule 1, SPI1 - spleen focus forming virus (sffv) proviral integration oncogene, TLR2 - toll-like receptor 2, BCL2L15 - bcl2-like 15, TLR4 - toll-like receptor 4, NUDT2 - nudix (nucleoside dipho…
GO:0043122	regulation of I-kappaB kinase/NF-kappaB signaling	1.18e-05	0.000758	2.57	25	[CAPN3 - calpain 3, (p94), MYD88 - myeloid differentiation primary response 88, UBD - ubiquitin d, NEK6 - nima-related kinase 6, SHISA5 - shisa family member 5, STAT1 - signal transducer and activator of transcription 1, 91kda, RBCK1 - ranbp-type and c3hc4-type zinc finger containing 1, TICAM1 - toll-like receptor adaptor molecule 1, TMEM106A - transmembrane protein 106a, BST2 - bone marrow strom…
GO:0001959	regulation of cytokine-mediated signaling pathway	1.26e-05	0.0008	2.93	20	[SOCS3 - suppressor of cytokine signaling 3, STAT1 - signal transducer and activator of transcription 1, 91kda, ADAM17 - adam metallopeptidase domain 17, SPHK1 - sphingosine kinase 1, ZBP1 - z-dna binding protein 1, RBCK1 - ranbp-type and c3hc4-type zinc finger containing 1, IKBKB - inhibitor of kappa light polypeptide gene enhancer in b-cells, kinase beta, ADAR - adenosine deaminase, rna-specifi…
GO:0032680	regulation of tumor necrosis factor production	1.32e-05	0.000836	3.13	18	[TYROBP - tyro protein tyrosine kinase binding protein, MAPKAPK2 - mitogen-activated protein kinase-activated protein kinase 2, CLEC7A - c-type lectin domain family 7, member a, TICAM1 - toll-like receptor adaptor molecule 1, ARHGEF2 - rho/rac guanine nucleotide exchange factor (gef) 2, GHSR - growth hormone secretagogue receptor, IL23A - interleukin 23, alpha subunit p19, ARG2 - arginase 2, BCL3…
GO:0032816	positive regulation of natural killer cell activation	1.35e-05	0.00085	7.69	7	[IL23A - interleukin 23, alpha subunit p19, LAMP1 - lysosomal-associated membrane protein 1, IL18 - interleukin 18 (interferon-gamma-inducing factor), IL15 - interleukin 15, TYROBP - tyro protein tyrosine kinase binding protein, STAT5B - signal transducer and activator of transcription 5b, TICAM1 - toll-like receptor adaptor molecule 1]
GO:0006953	acute-phase response	1.35e-05	0.000854	7.69	7	[FN1 - fibronectin 1, CD163 - cd163 molecule, SIGIRR - single immunoglobulin and toll-interleukin 1 receptor (tir) domain, IL6 - interleukin 6 (interferon, beta 2), PLSCR1 - phospholipid scramblase 1, IL1A - interleukin 1, alpha, IL6R - interleukin 6 receptor]
GO:0006672	ceramide metabolic process	1.37e-05	0.000857	4.01	13	[NEU1 - sialidase 1 (lysosomal sialidase), GBA - glucosidase, beta, acid, P2RX7 - purinergic receptor p2x, ligand-gated ion channel, 7, PSAP - prosaposin, SPTLC2 - serine palmitoyltransferase, long chain base subunit 2, ORMDL2 - orm1-like 2 (s. cerevisiae), B4GALT3 - udp-gal:betaglcnac beta 1,4- galactosyltransferase, polypeptide 3, ST8SIA4 - st8 alpha-n-acetyl-neuraminide alpha-2,8-sialyltransfe…
GO:0040017	positive regulation of locomotion	1.4e-05	0.00087	2.01	41	[CCR4 - chemokine (c-c motif) receptor 4, ICAM1 - intercellular adhesion molecule 1, CCR6 - chemokine (c-c motif) receptor 6, LGMN - legumain, FN1 - fibronectin 1, CMKLR1 - chemokine-like receptor 1, AAMP - angio-associated, migratory cell protein, CLEC7A - c-type lectin domain family 7, member a, ADAM17 - adam metallopeptidase domain 17, SPHK1 - sphingosine kinase 1, STAT5A - signal transducer a…
GO:0035580	specific granule lumen	2.51e-05	0.000951	4.4	11	[NEU1 - sialidase 1 (lysosomal sialidase), PDXK - pyridoxal (pyridoxine, vitamin b6) kinase, RETN - resistin, CFP - complement factor properdin, CHIT1 - chitinase 1 (chitotriosidase), TOLLIP - toll interacting protein, OSCAR - osteoclast associated, immunoglobulin-like receptor, CTSZ - cathepsin z, NFKB1 - nuclear factor of kappa light polypeptide gene enhancer in b-cells 1, CHI3L1 - chitinase 3-…
GO:0032651	regulation of interleukin-1 beta production	1.55e-05	0.000963	4.6	11	[GHSR - growth hormone secretagogue receptor, ARG2 - arginase 2, NLRP12 - nlr family, pyrin domain containing 12, P2RX7 - purinergic receptor p2x, ligand-gated ion channel, 7, PML - promyelocytic leukemia, TYROBP - tyro protein tyrosine kinase binding protein, TLR4 - toll-like receptor 4, TLR8 - toll-like receptor 8, CLEC7A - c-type lectin domain family 7, member a, CASP1 - caspase 1, apoptosis-r…
GO:2000026	regulation of multicellular organismal development	1.59e-05	0.000983	1.49	103	[IL18 - interleukin 18 (interferon-gamma-inducing factor), IL15 - interleukin 15, FN1 - fibronectin 1, CD274 - cd274 molecule, NRP1 - neuropilin 1, LDLR - low density lipoprotein receptor, IDO1 - indoleamine 2,3-dioxygenase 1, PML - promyelocytic leukemia, SPI1 - spleen focus forming virus (sffv) proviral integration oncogene, AGRN - agrin, BTG1 - b-cell translocation gene 1, anti-proliferative, …
GO:0050706	regulation of interleukin-1 beta secretion	1.64e-05	0.00101	6.39	8	[ARG2 - arginase 2, NLRP12 - nlr family, pyrin domain containing 12, P2RX7 - purinergic receptor p2x, ligand-gated ion channel, 7, PML - promyelocytic leukemia, TLR4 - toll-like receptor 4, TLR8 - toll-like receptor 8, CASP1 - caspase 1, apoptosis-related cysteine peptidase, PYCARD - pyd and card domain containing]
GO:0030335	positive regulation of cell migration	1.67e-05	0.00102	2.03	39	[ICAM1 - intercellular adhesion molecule 1, CCR6 - chemokine (c-c motif) receptor 6, LGMN - legumain, FN1 - fibronectin 1, CMKLR1 - chemokine-like receptor 1, AAMP - angio-associated, migratory cell protein, CLEC7A - c-type lectin domain family 7, member a, ADAM17 - adam metallopeptidase domain 17, SPHK1 - sphingosine kinase 1, STAT5A - signal transducer and activator of transcription 5a, CCR1 - …
GO:0034663	endoplasmic reticulum chaperone complex	2.84e-05	0.00105	10.99	5	[HSP90B1 - heat shock protein 90kda beta (grp94), member 1, MZB1 - marginal zone b and b1 cell-specific protein, P4HB - prolyl 4-hydroxylase, beta polypeptide, HSPA5 - heat shock 70kda protein 5 (glucose-regulated protein, 78kda), HYOU1 - hypoxia up-regulated 1]
GO:0050870	positive regulation of T cell activation	1.75e-05	0.00106	2.71	22	[IL18 - interleukin 18 (interferon-gamma-inducing factor), IL15 - interleukin 15, EBI3 - epstein-barr virus induced 3, STAT5B - signal transducer and activator of transcription 5b, AIF1 - allograft inflammatory factor 1, CD274 - cd274 molecule, HLX - h2.0-like homeobox, IL23A - interleukin 23, alpha subunit p19, CTLA4 - cytotoxic t-lymphocyte-associated protein 4, GRB2 - growth factor receptor-bo…
GO:0050790	regulation of catalytic activity	1.77e-05	0.00107	1.43	120	[IL18 - interleukin 18 (interferon-gamma-inducing factor), LGMN - legumain, FN1 - fibronectin 1, DTX3L - deltex 3-like (drosophila), PSAP - prosaposin, NRP1 - neuropilin 1, BST2 - bone marrow stromal cell antigen 2, PML - promyelocytic leukemia, AGRN - agrin, DCUN1D3 - dcn1, defective in cullin neddylation 1, domain containing 3, PYCARD - pyd and card domain containing, P2RX7 - purinergic recepto…
GO:1904018	positive regulation of vasculature development	1.83e-05	0.00111	2.86	20	[CTSH - cathepsin h, CFLAR - casp8 and fadd-like apoptosis regulator, SPHK1 - sphingosine kinase 1, IL1A - interleukin 1, alpha, KLF4 - kruppel-like factor 4 (gut), GHSR - growth hormone secretagogue receptor, NRP1 - neuropilin 1, SOD2 - superoxide dismutase 2, mitochondrial, SASH1 - sam and sh3 domain containing 1, ANXA1 - annexin a1, GRN - granulin, IL8 - interleukin 8, HMOX1 - heme oxygenase (…
GO:0001816	cytokine production	1.88e-05	0.00113	3.67	14	[IL18 - interleukin 18 (interferon-gamma-inducing factor), AIF1 - allograft inflammatory factor 1, S100A8 - s100 calcium binding protein a8, SLC11A1 - solute carrier family 11 (proton-coupled divalent metal ion transporter), member 1, TMEM173 - transmembrane protein 173, IRF7 - interferon regulatory factor 7, IDO1 - indoleamine 2,3-dioxygenase 1, TLR2 - toll-like receptor 2, SCIMP - slp adaptor a…
GO:1903039	positive regulation of leukocyte cell-cell adhesion	2.06e-05	0.00124	2.61	23	[ICAM1 - intercellular adhesion molecule 1, IL18 - interleukin 18 (interferon-gamma-inducing factor), IL15 - interleukin 15, EBI3 - epstein-barr virus induced 3, STAT5B - signal transducer and activator of transcription 5b, AIF1 - allograft inflammatory factor 1, CD274 - cd274 molecule, HLX - h2.0-like homeobox, IL23A - interleukin 23, alpha subunit p19, CTLA4 - cytotoxic t-lymphocyte-associated …
GO:0032757	positive regulation of interleukin-8 production	2.1e-05	0.00125	5.46	9	[FFAR2 - free fatty acid receptor 2, CD14 - cd14 molecule, MYD88 - myeloid differentiation primary response 88, TLR2 - toll-like receptor 2, TLR8 - toll-like receptor 8, TLR4 - toll-like receptor 4, CLEC7A - c-type lectin domain family 7, member a, DDX58 - dead (asp-glu-ala-asp) box polypeptide 58, PYCARD - pyd and card domain containing]
GO:0042531	positive regulation of tyrosine phosphorylation of STAT protein	2.16e-05	0.00128	4.88	10	[CSF1R - colony stimulating factor 1 receptor, IL23A - interleukin 23, alpha subunit p19, IL18 - interleukin 18 (interferon-gamma-inducing factor), TNFRSF1A - tumor necrosis factor receptor superfamily, member 1a, IL15 - interleukin 15, SOCS3 - suppressor of cytokine signaling 3, PARP14 - poly (adp-ribose) polymerase family, member 14, PARP9 - poly (adp-ribose) polymerase family, member 9, IL6 - …
GO:1903428	positive regulation of reactive oxygen species biosynthetic process	2.16e-05	0.00128	4.88	10	[ICAM1 - intercellular adhesion molecule 1, PKD2 - polycystic kidney disease 2 (autosomal dominant), TLR4 - toll-like receptor 4, PTGS2 - prostaglandin-endoperoxide synthase 2 (prostaglandin g/h synthase and cyclooxygenase), CLEC7A - c-type lectin domain family 7, member a, AIF1 - allograft inflammatory factor 1, KLF2 - kruppel-like factor 2 (lung), CYBA - cytochrome b-245, alpha polypeptide, TIC…
GO:0071359	cellular response to dsRNA	2.19e-05	0.00128	7.24	7	[IRF3 - interferon regulatory factor 3, RALB - v-ral simian leukemia viral oncogene homolog b, TMEM173 - transmembrane protein 173, FLOT1 - flotillin 1, P2RX7 - purinergic receptor p2x, ligand-gated ion channel, 7, DDX58 - dead (asp-glu-ala-asp) box polypeptide 58, NFKB1 - nuclear factor of kappa light polypeptide gene enhancer in b-cells 1]
GO:2000778	positive regulation of interleukin-6 secretion	2.19e-05	0.00129	7.24	7	[TLR2 - toll-like receptor 2, TLR4 - toll-like receptor 4, TLR8 - toll-like receptor 8, DDX58 - dead (asp-glu-ala-asp) box polypeptide 58, IL1RAP - interleukin 1 receptor accessory protein, AIF1 - allograft inflammatory factor 1, PYCARD - pyd and card domain containing]
GO:0051222	positive regulation of protein transport	2.27e-05	0.00133	2.19	32	[FFAR2 - free fatty acid receptor 2, CLEC5A - c-type lectin domain family 5, member a, CD274 - cd274 molecule, TNFRSF4 - tumor necrosis factor receptor superfamily, member 4, VPS35 - vacuolar protein sorting 35 homolog (s. cerevisiae), LEPROT - leptin receptor overlapping transcript, CD14 - cd14 molecule, TLR2 - toll-like receptor 2, TLR4 - toll-like receptor 4, TLR8 - toll-like receptor 8, PTGS2…
GO:0030149	sphingolipid catabolic process	2.38e-05	0.00138	6.12	8	[NEU1 - sialidase 1 (lysosomal sialidase), GBA - glucosidase, beta, acid, HEXB - hexosaminidase b (beta polypeptide), PSAP - prosaposin, GM2A - gm2 ganglioside activator, SPHK1 - sphingosine kinase 1, SMPD1 - sphingomyelin phosphodiesterase 1, acid lysosomal, ASAH1 - n-acylsphingosine amidohydrolase (acid ceramidase) 1]
GO:0006915	apoptotic process	2.44e-05	0.00141	1.88	46	[RALB - v-ral simian leukemia viral oncogene homolog b, BCL2L14 - bcl2-like 14 (apoptosis facilitator), CAPN3 - calpain 3, (p94), BMX - bmx non-receptor tyrosine kinase, MYD88 - myeloid differentiation primary response 88, NEK6 - nima-related kinase 6, IER3 - immediate early response 3, GSDMA - gasdermin a, CD14 - cd14 molecule, MZB1 - marginal zone b and b1 cell-specific protein, MX1 - myxovirus…
GO:0004888	transmembrane signaling receptor activity	1.8e-06	0.00142	2.2	40	[CCR4 - chemokine (c-c motif) receptor 4, P2RY13 - purinergic receptor p2y, g-protein coupled, 13, ICAM1 - intercellular adhesion molecule 1, FFAR2 - free fatty acid receptor 2, CCR6 - chemokine (c-c motif) receptor 6, CMKLR1 - chemokine-like receptor 1, EBI3 - epstein-barr virus induced 3, SPHK1 - sphingosine kinase 1, ABCA1 - atp-binding cassette, sub-family a (abc1), member 1, CCR1 - chemokine…
GO:2000147	positive regulation of cell motility	2.51e-05	0.00144	2	39	[ICAM1 - intercellular adhesion molecule 1, CCR6 - chemokine (c-c motif) receptor 6, LGMN - legumain, FN1 - fibronectin 1, CMKLR1 - chemokine-like receptor 1, AAMP - angio-associated, migratory cell protein, CLEC7A - c-type lectin domain family 7, member a, ADAM17 - adam metallopeptidase domain 17, SPHK1 - sphingosine kinase 1, STAT5A - signal transducer and activator of transcription 5a, CCR1 - …
GO:0060760	positive regulation of response to cytokine stimulus	2.51e-05	0.00145	4.4	11	[IRF3 - interferon regulatory factor 3, IRF7 - interferon regulatory factor 7, PARP14 - poly (adp-ribose) polymerase family, member 14, TLR2 - toll-like receptor 2, PARP9 - poly (adp-ribose) polymerase family, member 9, TLR4 - toll-like receptor 4, DDX58 - dead (asp-glu-ala-asp) box polypeptide 58, ZBP1 - z-dna binding protein 1, ADAM17 - adam metallopeptidase domain 17, CASP1 - caspase 1, apopto…
GO:0042493	response to drug	2.57e-05	0.00147	1.8	51	[ABCA1 - atp-binding cassette, sub-family a (abc1), member 1, CD69 - cd69 molecule, ACSL1 - acyl-coa synthetase long-chain family member 1, JAG1 - jagged 1, SPI1 - spleen focus forming virus (sffv) proviral integration oncogene, TLR2 - toll-like receptor 2, SELL - selectin l, CPT1A - carnitine palmitoyltransferase 1a (liver), P2RX7 - purinergic receptor p2x, ligand-gated ion channel, 7, EIF4EBP1 …
GO:0072525	pyridine-containing compound biosynthetic process	2.59e-05	0.00147	4.06	12	[PDXK - pyridoxal (pyridoxine, vitamin b6) kinase, GALK1 - galactokinase 1, PFKL - phosphofructokinase, liver, PGM2L1 - phosphoglucomutase 2-like 1, IDO1 - indoleamine 2,3-dioxygenase 1, HK3 - hexokinase 3 (white cell), PARP9 - poly (adp-ribose) polymerase family, member 9, PTGS2 - prostaglandin-endoperoxide synthase 2 (prostaglandin g/h synthase and cyclooxygenase), PARP16 - poly (adp-ribose) po…
GO:0031090	organelle membrane	4.14e-05	0.00151	1.36	137	[DTX3L - deltex 3-like (drosophila), UNC93B1 - unc-93 homolog b1 (c. elegans), SDHD - succinate dehydrogenase complex, subunit d, integral membrane protein, PSAP - prosaposin, INTS5 - integrator complex subunit 5, CD274 - cd274 molecule, TICAM1 - toll-like receptor adaptor molecule 1, CLEC5A - c-type lectin domain family 5, member a, LDLR - low density lipoprotein receptor, TMEM173 - transmembran…
GO:0035556	intracellular signal transduction	2.72e-05	0.00154	1.51	92	[ARID3A - at rich interactive domain 3a (bright-like), IL18 - interleukin 18 (interferon-gamma-inducing factor), BMX - bmx non-receptor tyrosine kinase, ABCA1 - atp-binding cassette, sub-family a (abc1), member 1, TICAM1 - toll-like receptor adaptor molecule 1, ASB9 - ankyrin repeat and socs box containing 9, RBCK1 - ranbp-type and c3hc4-type zinc finger containing 1, RCAN3 - rcan family member 3…
GO:0045429	positive regulation of nitric oxide biosynthetic process	2.84e-05	0.0016	5.27	9	[PKD2 - polycystic kidney disease 2 (autosomal dominant), ICAM1 - intercellular adhesion molecule 1, TLR4 - toll-like receptor 4, PTGS2 - prostaglandin-endoperoxide synthase 2 (prostaglandin g/h synthase and cyclooxygenase), CLEC7A - c-type lectin domain family 7, member a, AIF1 - allograft inflammatory factor 1, KLF2 - kruppel-like factor 2 (lung), TICAM1 - toll-like receptor adaptor molecule 1,…
GO:0060326	cell chemotaxis	2.98e-05	0.00167	2.96	18	[CCR4 - chemokine (c-c motif) receptor 4, CCR6 - chemokine (c-c motif) receptor 6, FFAR2 - free fatty acid receptor 2, CSF3R - colony stimulating factor 3 receptor (granulocyte), S100A8 - s100 calcium binding protein a8, CCR1 - chemokine (c-c motif) receptor 1, IL1A - interleukin 1, alpha, NRP1 - neuropilin 1, CXCL2 - chemokine (c-x-c motif) ligand 2, S1PR1 - sphingosine-1-phosphate receptor 1, A…
GO:0001932	regulation of protein phosphorylation	3.04e-05	0.0017	1.56	80	[IL18 - interleukin 18 (interferon-gamma-inducing factor), IL15 - interleukin 15, FN1 - fibronectin 1, PSAP - prosaposin, TMEM106A - transmembrane protein 106a, IL23A - interleukin 23, alpha subunit p19, ACSL1 - acyl-coa synthetase long-chain family member 1, SLC11A1 - solute carrier family 11 (proton-coupled divalent metal ion transporter), member 1, NRP1 - neuropilin 1, PML - promyelocytic leuk…
GO:0098589	membrane region	4.77e-05	0.0017	2.28	27	[ICAM1 - intercellular adhesion molecule 1, ARID3A - at rich interactive domain 3a (bright-like), FLOT1 - flotillin 1, ADAM17 - adam metallopeptidase domain 17, ABCA1 - atp-binding cassette, sub-family a (abc1), member 1, ABCG2 - atp-binding cassette, sub-family g (white), member 2, BST2 - bone marrow stromal cell antigen 2, CD14 - cd14 molecule, TLR2 - toll-like receptor 2, PTGS2 - prostaglandin…
GO:0051223	regulation of protein transport	3.08e-05	0.00172	1.86	46	[FFAR2 - free fatty acid receptor 2, FN1 - fibronectin 1, SRGN - serglycin, CLEC5A - c-type lectin domain family 5, member a, CD274 - cd274 molecule, TNFRSF4 - tumor necrosis factor receptor superfamily, member 4, VPS35 - vacuolar protein sorting 35 homolog (s. cerevisiae), ARG2 - arginase 2, LEPROT - leptin receptor overlapping transcript, CD14 - cd14 molecule, PML - promyelocytic leukemia, TLR2…
GO:0031325	positive regulation of cellular metabolic process	3.14e-05	0.00174	1.33	159	[IL18 - interleukin 18 (interferon-gamma-inducing factor), IL15 - interleukin 15, LGMN - legumain, FN1 - fibronectin 1, DTX3L - deltex 3-like (drosophila), PSAP - prosaposin, EBI3 - epstein-barr virus induced 3, TICAM1 - toll-like receptor adaptor molecule 1, TMEM106A - transmembrane protein 106a, NRP1 - neuropilin 1, LDLR - low density lipoprotein receptor, TMEM173 - transmembrane protein 173, P…
GO:0032945	negative regulation of mononuclear cell proliferation	3.15e-05	0.00174	4.3	11	[VSIG4 - v-set and immunoglobulin domain containing 4, CTLA4 - cytotoxic t-lymphocyte-associated protein 4, ARG2 - arginase 2, IDO1 - indoleamine 2,3-dioxygenase 1, ZBTB7B - zinc finger and btb domain containing 7b, TYROBP - tyro protein tyrosine kinase binding protein, FOXP3 - forkhead box p3, CD86 - cd86 molecule, PDCD1LG2 - programmed cell death 1 ligand 2, CD274 - cd274 molecule, CD80 - cd80 …
GO:0050672	negative regulation of lymphocyte proliferation	3.15e-05	0.00174	4.3	11	[VSIG4 - v-set and immunoglobulin domain containing 4, ARG2 - arginase 2, CTLA4 - cytotoxic t-lymphocyte-associated protein 4, IDO1 - indoleamine 2,3-dioxygenase 1, ZBTB7B - zinc finger and btb domain containing 7b, TYROBP - tyro protein tyrosine kinase binding protein, FOXP3 - forkhead box p3, CD86 - cd86 molecule, PDCD1LG2 - programmed cell death 1 ligand 2, CD274 - cd274 molecule, CD80 - cd80 …
GO:1901224	positive regulation of NIK/NF-kappaB signaling	3.17e-05	0.00174	3.98	12	[IL23A - interleukin 23, alpha subunit p19, TNFSF15 - tumor necrosis factor (ligand) superfamily, member 15, NLRP12 - nlr family, pyrin domain containing 12, IL18 - interleukin 18 (interferon-gamma-inducing factor), CD14 - cd14 molecule, SASH1 - sam and sh3 domain containing 1, TLR2 - toll-like receptor 2, TLR4 - toll-like receptor 4, EIF2AK2 - eukaryotic translation initiation factor 2-alpha kin…
GO:0044281	small molecule metabolic process	3.22e-05	0.00176	1.51	91	[SCPEP1 - serine carboxypeptidase 1, NAPEPLD - n-acyl phosphatidylethanolamine phospholipase d, LGMN - legumain, IL15 - interleukin 15, SDHD - succinate dehydrogenase complex, subunit d, integral membrane protein, GNS - glucosamine (n-acetyl)-6-sulfatase, PGD - phosphogluconate dehydrogenase, ABCA1 - atp-binding cassette, sub-family a (abc1), member 1, SLC16A3 - solute carrier family 16 (monocarb…
GO:0031253	cell projection membrane	5.07e-05	0.00177	2.36	25	[PKD2 - polycystic kidney disease 2 (autosomal dominant), NAPEPLD - n-acyl phosphatidylethanolamine phospholipase d, CNGA4 - cyclic nucleotide gated channel alpha 4, BMX - bmx non-receptor tyrosine kinase, ADAM17 - adam metallopeptidase domain 17, ABCG2 - atp-binding cassette, sub-family g (white), member 2, FGD2 - fyve, rhogef and ph domain containing 2, PHLPP2 - ph domain and leucine rich repea…
GO:0090087	regulation of peptide transport	3.27e-05	0.00178	1.84	47	[FFAR2 - free fatty acid receptor 2, FN1 - fibronectin 1, SRGN - serglycin, CLEC5A - c-type lectin domain family 5, member a, CD274 - cd274 molecule, TNFRSF4 - tumor necrosis factor receptor superfamily, member 4, VPS35 - vacuolar protein sorting 35 homolog (s. cerevisiae), ARG2 - arginase 2, LEPROT - leptin receptor overlapping transcript, CD14 - cd14 molecule, PML - promyelocytic leukemia, TLR2…
GO:0032733	positive regulation of interleukin-10 production	3.4e-05	0.00184	5.86	8	[IL23A - interleukin 23, alpha subunit p19, BCL3 - b-cell cll/lymphoma 3, TLR2 - toll-like receptor 2, TLR4 - toll-like receptor 4, CLEC7A - c-type lectin domain family 7, member a, PYCARD - pyd and card domain containing, TIGIT - t cell immunoreceptor with ig and itim domains, CD274 - cd274 molecule]
GO:0050704	regulation of interleukin-1 secretion	3.4e-05	0.00184	5.86	8	[ARG2 - arginase 2, NLRP12 - nlr family, pyrin domain containing 12, P2RX7 - purinergic receptor p2x, ligand-gated ion channel, 7, PML - promyelocytic leukemia, TLR4 - toll-like receptor 4, TLR8 - toll-like receptor 8, CASP1 - caspase 1, apoptosis-related cysteine peptidase, PYCARD - pyd and card domain containing]
GO:0042130	negative regulation of T cell proliferation	3.63e-05	0.00195	4.63	10	[VSIG4 - v-set and immunoglobulin domain containing 4, CTLA4 - cytotoxic t-lymphocyte-associated protein 4, ARG2 - arginase 2, IDO1 - indoleamine 2,3-dioxygenase 1, ZBTB7B - zinc finger and btb domain containing 7b, FOXP3 - forkhead box p3, CD86 - cd86 molecule, PDCD1LG2 - programmed cell death 1 ligand 2, CD274 - cd274 molecule, CD80 - cd80 molecule]
GO:0048770	pigment granule	5.8e-05	0.00195	3.18	15	[STOM - stomatin, FLOT1 - flotillin 1, LAMP1 - lysosomal-associated membrane protein 1, MREG - melanoregulin, CTSB - cathepsin b, CAPG - capping protein (actin filament), gelsolin-like, P4HB - prolyl 4-hydroxylase, beta polypeptide, PDIA4 - protein disulfide isomerase family a, member 4, MMP14 - matrix metallopeptidase 14 (membrane-inserted), SLC1A4 - solute carrier family 1 (glutamate/neutral am…
GO:1903038	negative regulation of leukocyte cell-cell adhesion	3.71e-05	0.00199	3.3	15	[CD274 - cd274 molecule, HLX - h2.0-like homeobox, KLF4 - kruppel-like factor 4 (gut), CTLA4 - cytotoxic t-lymphocyte-associated protein 4, ARG2 - arginase 2, VSIG4 - v-set and immunoglobulin domain containing 4, IDO1 - indoleamine 2,3-dioxygenase 1, ADORA2A - adenosine a2a receptor, ZBTB7B - zinc finger and btb domain containing 7b, ANXA1 - annexin a1, FOXP3 - forkhead box p3, CD86 - cd86 molecu…
GO:0051272	positive regulation of cellular component movement	3.72e-05	0.00199	1.96	39	[ICAM1 - intercellular adhesion molecule 1, CCR6 - chemokine (c-c motif) receptor 6, LGMN - legumain, FN1 - fibronectin 1, CMKLR1 - chemokine-like receptor 1, AAMP - angio-associated, migratory cell protein, CLEC7A - c-type lectin domain family 7, member a, ADAM17 - adam metallopeptidase domain 17, SPHK1 - sphingosine kinase 1, STAT5A - signal transducer and activator of transcription 5a, CCR1 - …
GO:0030595	leukocyte chemotaxis	3.74e-05	0.00199	3.47	14	[CCR6 - chemokine (c-c motif) receptor 6, FFAR2 - free fatty acid receptor 2, CSF3R - colony stimulating factor 3 receptor (granulocyte), S100A8 - s100 calcium binding protein a8, IL1A - interleukin 1, alpha, CCR1 - chemokine (c-c motif) receptor 1, CXCL2 - chemokine (c-x-c motif) ligand 2, S1PR1 - sphingosine-1-phosphate receptor 1, ANXA1 - annexin a1, RAC1 - ras-related c3 botulinum toxin subst…
GO:0050777	negative regulation of immune response	3.76e-05	0.00199	3.02	17	[DHX58 - dexh (asp-glu-x-his) box polypeptide 58, TRAFD1 - traf-type zinc finger domain containing 1, SERPING1 - serpin peptidase inhibitor, clade g (c1 inhibitor), member 1, GPX1 - glutathione peroxidase 1, HLX - h2.0-like homeobox, ADAR - adenosine deaminase, rna-specific, VSIG4 - v-set and immunoglobulin domain containing 4, BST2 - bone marrow stromal cell antigen 2, ARG2 - arginase 2, CTLA4 -…
GO:0042470	melanosome	5.8e-05	0.00199	3.18	15	[STOM - stomatin, FLOT1 - flotillin 1, LAMP1 - lysosomal-associated membrane protein 1, MREG - melanoregulin, CTSB - cathepsin b, CAPG - capping protein (actin filament), gelsolin-like, P4HB - prolyl 4-hydroxylase, beta polypeptide, PDIA4 - protein disulfide isomerase family a, member 4, MMP14 - matrix metallopeptidase 14 (membrane-inserted), SLC1A4 - solute carrier family 1 (glutamate/neutral am…
GO:0043331	response to dsRNA	3.81e-05	0.00201	5.1	9	[IRF3 - interferon regulatory factor 3, RALB - v-ral simian leukemia viral oncogene homolog b, TMEM173 - transmembrane protein 173, FLOT1 - flotillin 1, P2RX7 - purinergic receptor p2x, ligand-gated ion channel, 7, NFKBIA - nuclear factor of kappa light polypeptide gene enhancer in b-cells inhibitor, alpha, DDX58 - dead (asp-glu-ala-asp) box polypeptide 58, NFKB1 - nuclear factor of kappa light p…
GO:0031399	regulation of protein modification process	3.83e-05	0.00201	1.47	99	[IL18 - interleukin 18 (interferon-gamma-inducing factor), IL15 - interleukin 15, FN1 - fibronectin 1, DTX3L - deltex 3-like (drosophila), PSAP - prosaposin, TICAM1 - toll-like receptor adaptor molecule 1, TMEM106A - transmembrane protein 106a, NRP1 - neuropilin 1, PML - promyelocytic leukemia, SPI1 - spleen focus forming virus (sffv) proviral integration oncogene, TOLLIP - toll interacting prote…
GO:0002695	negative regulation of leukocyte activation	3.83e-05	0.00201	2.81	19	[TYROBP - tyro protein tyrosine kinase binding protein, CD274 - cd274 molecule, HLX - h2.0-like homeobox, VSIG4 - v-set and immunoglobulin domain containing 4, LDLR - low density lipoprotein receptor, ARG2 - arginase 2, CTLA4 - cytotoxic t-lymphocyte-associated protein 4, IDO1 - indoleamine 2,3-dioxygenase 1, ADORA2A - adenosine a2a receptor, ZBTB7B - zinc finger and btb domain containing 7b, ANX…
GO:0005126	cytokine receptor binding	3.15e-06	0.00207	3	22	[TNFSF15 - tumor necrosis factor (ligand) superfamily, member 15, IL18 - interleukin 18 (interferon-gamma-inducing factor), CSF3 - colony stimulating factor 3 (granulocyte), IL15 - interleukin 15, MYD88 - myeloid differentiation primary response 88, STAT1 - signal transducer and activator of transcription 1, 91kda, CFLAR - casp8 and fadd-like apoptosis regulator, EBI3 - epstein-barr virus induced…
GO:0048523	negative regulation of cellular process	4.08e-05	0.00213	1.26	207	[DHX58 - dexh (asp-glu-x-his) box polypeptide 58, ABCA1 - atp-binding cassette, sub-family a (abc1), member 1, CLEC5A - c-type lectin domain family 5, member a, CD274 - cd274 molecule, TICAM1 - toll-like receptor adaptor molecule 1, NRP1 - neuropilin 1, BST2 - bone marrow stromal cell antigen 2, LDLR - low density lipoprotein receptor, ORMDL2 - orm1-like 2 (s. cerevisiae), PML - promyelocytic leu…
GO:0040012	regulation of locomotion	4.18e-05	0.00217	1.69	59	[ZSWIM4 - zinc finger, swim-type containing 4, TIMP1 - timp metallopeptidase inhibitor 1, LGMN - legumain, FN1 - fibronectin 1, AAMP - angio-associated, migratory cell protein, CD274 - cd274 molecule, SEMA4A - sema domain, immunoglobulin domain (ig), transmembrane domain (tm) and short cytoplasmic domain, (semaphorin) 4a, IL23A - interleukin 23, alpha subunit p19, VPS35 - vacuolar protein sorting…
GO:0046634	regulation of alpha-beta T cell activation	4.4e-05	0.00228	3.42	14	[IL18 - interleukin 18 (interferon-gamma-inducing factor), EBI3 - epstein-barr virus induced 3, CD274 - cd274 molecule, HLX - h2.0-like homeobox, IL23A - interleukin 23, alpha subunit p19, ARG2 - arginase 2, ADORA2A - adenosine a2a receptor, ZBTB7B - zinc finger and btb domain containing 7b, ANXA1 - annexin a1, IL27 - interleukin 27, ZAP70 - zeta-chain (tcr) associated protein kinase 70kda, FOXP3…
GO:0071496	cellular response to external stimulus	4.57e-05	0.00235	2.25	28	[RALB - v-ral simian leukemia viral oncogene homolog b, ICAM1 - intercellular adhesion molecule 1, IL15 - interleukin 15, MYD88 - myeloid differentiation primary response 88, TLR8 - toll-like receptor 8, PTGS2 - prostaglandin-endoperoxide synthase 2 (prostaglandin g/h synthase and cyclooxygenase), TLR4 - toll-like receptor 4, EIF2AK2 - eukaryotic translation initiation factor 2-alpha kinase 2, UP…
GO:0034612	response to tumor necrosis factor	4.7e-05	0.00241	3.09	16	[ICAM1 - intercellular adhesion molecule 1, GBA - glucosidase, beta, acid, UBD - ubiquitin d, NFKB1 - nuclear factor of kappa light polypeptide gene enhancer in b-cells 1, SPHK1 - sphingosine kinase 1, KLF2 - kruppel-like factor 2 (lung), ARHGEF2 - rho/rac guanine nucleotide exchange factor (gef) 2, IKBKB - inhibitor of kappa light polypeptide gene enhancer in b-cells, kinase beta, CD14 - cd14 mo…
GO:0007259	JAK-STAT cascade	4.75e-05	0.00241	5.63	8	[PKD2 - polycystic kidney disease 2 (autosomal dominant), IFNAR1 - interferon (alpha, beta and omega) receptor 1, SOCS3 - suppressor of cytokine signaling 3, STAT2 - signal transducer and activator of transcription 2, 113kda, NMI - n-myc (and stat) interactor, STAT1 - signal transducer and activator of transcription 1, 91kda, STAT5B - signal transducer and activator of transcription 5b, STAT5A - …
GO:0001934	positive regulation of protein phosphorylation	4.74e-05	0.00242	1.69	58	[IL18 - interleukin 18 (interferon-gamma-inducing factor), IL15 - interleukin 15, PSAP - prosaposin, IL23A - interleukin 23, alpha subunit p19, TMEM106A - transmembrane protein 106a, NRP1 - neuropilin 1, SLC11A1 - solute carrier family 11 (proton-coupled divalent metal ion transporter), member 1, ACSL1 - acyl-coa synthetase long-chain family member 1, TLR4 - toll-like receptor 4, CHI3L1 - chitina…
GO:0097696	STAT cascade	4.75e-05	0.00242	5.63	8	[PKD2 - polycystic kidney disease 2 (autosomal dominant), IFNAR1 - interferon (alpha, beta and omega) receptor 1, SOCS3 - suppressor of cytokine signaling 3, STAT2 - signal transducer and activator of transcription 2, 113kda, NMI - n-myc (and stat) interactor, STAT1 - signal transducer and activator of transcription 1, 91kda, STAT5B - signal transducer and activator of transcription 5b, STAT5A - …
GO:0070664	negative regulation of leukocyte proliferation	4.88e-05	0.00247	4.12	11	[VSIG4 - v-set and immunoglobulin domain containing 4, ARG2 - arginase 2, CTLA4 - cytotoxic t-lymphocyte-associated protein 4, IDO1 - indoleamine 2,3-dioxygenase 1, ZBTB7B - zinc finger and btb domain containing 7b, TYROBP - tyro protein tyrosine kinase binding protein, FOXP3 - forkhead box p3, CD86 - cd86 molecule, PDCD1LG2 - programmed cell death 1 ligand 2, CD274 - cd274 molecule, CD80 - cd80 …
GO:0006665	sphingolipid metabolic process	4.9e-05	0.00247	2.96	17	[NEU1 - sialidase 1 (lysosomal sialidase), GBA - glucosidase, beta, acid, SGPP2 - sphingosine-1-phosphate phosphatase 2, P2RX7 - purinergic receptor p2x, ligand-gated ion channel, 7, PSAP - prosaposin, SPTLC2 - serine palmitoyltransferase, long chain base subunit 2, SPHK1 - sphingosine kinase 1, ORMDL2 - orm1-like 2 (s. cerevisiae), SERINC2 - serine incorporator 2, B4GALT3 - udp-gal:betaglcnac be…
GO:0002687	positive regulation of leukocyte migration	5.01e-05	0.00252	3.22	15	[ICAM1 - intercellular adhesion molecule 1, CCR6 - chemokine (c-c motif) receptor 6, LGMN - legumain, CMKLR1 - chemokine-like receptor 1, MMP14 - matrix metallopeptidase 14 (membrane-inserted), AIF1 - allograft inflammatory factor 1, ADAM17 - adam metallopeptidase domain 17, CCR1 - chemokine (c-c motif) receptor 1, IL23A - interleukin 23, alpha subunit p19, RAC1 - ras-related c3 botulinum toxin s…
GO:0045622	regulation of T-helper cell differentiation	5.03e-05	0.00252	4.95	9	[IL23A - interleukin 23, alpha subunit p19, IL18 - interleukin 18 (interferon-gamma-inducing factor), ZBTB7B - zinc finger and btb domain containing 7b, ANXA1 - annexin a1, IL27 - interleukin 27, FOXP3 - forkhead box p3, CD86 - cd86 molecule, HLX - h2.0-like homeobox, CD80 - cd80 molecule]
GO:0019915	lipid storage	5.13e-05	0.00256	6.48	7	[DGAT2 - diacylglycerol o-acyltransferase 2, FFAR2 - free fatty acid receptor 2, HEXB - hexosaminidase b (beta polypeptide), PLIN5 - perilipin 5, SOAT1 - sterol o-acyltransferase 1, GM2A - gm2 ganglioside activator, STAT5B - signal transducer and activator of transcription 5b]
GO:0022409	positive regulation of cell-cell adhesion	5.14e-05	0.00256	2.41	24	[ICAM1 - intercellular adhesion molecule 1, FLOT1 - flotillin 1, IL18 - interleukin 18 (interferon-gamma-inducing factor), IL15 - interleukin 15, EBI3 - epstein-barr virus induced 3, STAT5B - signal transducer and activator of transcription 5b, AIF1 - allograft inflammatory factor 1, HLX - h2.0-like homeobox, CD274 - cd274 molecule, IL23A - interleukin 23, alpha subunit p19, CTLA4 - cytotoxic t-l…
GO:0009628	response to abiotic stimulus	5.43e-05	0.00269	1.65	62	[LGMN - legumain, CAPN3 - calpain 3, (p94), PML - promyelocytic leukemia, TLR2 - toll-like receptor 2, TLR4 - toll-like receptor 4, TLR8 - toll-like receptor 8, DCUN1D3 - dcn1, defective in cullin neddylation 1, domain containing 3, CASP1 - caspase 1, apoptosis-related cysteine peptidase, CHI3L1 - chitinase 3-like 1 (cartilage glycoprotein-39), METRNL - meteorin, glial cell differentiation regula…
GO:0060089	molecular transducer activity	4.81e-06	0.00271	1.92	51	[EBI3 - epstein-barr virus induced 3, ABCA1 - atp-binding cassette, sub-family a (abc1), member 1, CD69 - cd69 molecule, NRP1 - neuropilin 1, IFNAR1 - interferon (alpha, beta and omega) receptor 1, TLR2 - toll-like receptor 2, TLR8 - toll-like receptor 8, IFNGR2 - interferon gamma receptor 2 (interferon gamma transducer 1), TLR4 - toll-like receptor 4, VDR - vitamin d (1,25- dihydroxyvitamin d3) …
GO:0045121	membrane raft	8.24e-05	0.00272	2.25	26	[ICAM1 - intercellular adhesion molecule 1, ARID3A - at rich interactive domain 3a (bright-like), FLOT1 - flotillin 1, ADAM17 - adam metallopeptidase domain 17, ABCA1 - atp-binding cassette, sub-family a (abc1), member 1, ABCG2 - atp-binding cassette, sub-family g (white), member 2, BST2 - bone marrow stromal cell antigen 2, CD14 - cd14 molecule, TLR2 - toll-like receptor 2, PTGS2 - prostaglandin…
GO:0005768	endosome	8.53e-05	0.00277	1.83	43	[FLOT1 - flotillin 1, LRPAP1 - low density lipoprotein receptor-related protein associated protein 1, NAPEPLD - n-acyl phosphatidylethanolamine phospholipase d, IL15 - interleukin 15, LGMN - legumain, MICALL1 - mical-like 1, DTX3L - deltex 3-like (drosophila), UNC93B1 - unc-93 homolog b1 (c. elegans), TBC1D17 - tbc1 domain family, member 17, PSAP - prosaposin, FCHSD2 - fch and double sh3 domains …
GO:0050688	regulation of defense response to virus	5.68e-05	0.0028	3.77	12	[IL23A - interleukin 23, alpha subunit p19, TMEM173 - transmembrane protein 173, DHX58 - dexh (asp-glu-x-his) box polypeptide 58, IL15 - interleukin 15, HERC5 - hect and rld domain containing e3 ubiquitin protein ligase 5, DTX3L - deltex 3-like (drosophila), IL27 - interleukin 27, DDX60 - dead (asp-glu-ala-asp) box polypeptide 60, PARP9 - poly (adp-ribose) polymerase family, member 9, STAT1 - sig…
GO:0009893	positive regulation of metabolic process	5.7e-05	0.0028	1.3	169	[IL18 - interleukin 18 (interferon-gamma-inducing factor), IL15 - interleukin 15, LGMN - legumain, FN1 - fibronectin 1, DTX3L - deltex 3-like (drosophila), PSAP - prosaposin, EBI3 - epstein-barr virus induced 3, TICAM1 - toll-like receptor adaptor molecule 1, TMEM106A - transmembrane protein 106a, NRP1 - neuropilin 1, LDLR - low density lipoprotein receptor, TMEM173 - transmembrane protein 173, P…
GO:0098857	membrane microdomain	8.95e-05	0.00285	2.24	26	[ICAM1 - intercellular adhesion molecule 1, ARID3A - at rich interactive domain 3a (bright-like), FLOT1 - flotillin 1, ADAM17 - adam metallopeptidase domain 17, ABCA1 - atp-binding cassette, sub-family a (abc1), member 1, ABCG2 - atp-binding cassette, sub-family g (white), member 2, BST2 - bone marrow stromal cell antigen 2, CD14 - cd14 molecule, TLR2 - toll-like receptor 2, PTGS2 - prostaglandin…
GO:0005789	endoplasmic reticulum membrane	9.36e-05	0.00293	1.66	57	[UNC93B1 - unc-93 homolog b1 (c. elegans), NCEH1 - neutral cholesterol ester hydrolase 1, ABCA1 - atp-binding cassette, sub-family a (abc1), member 1, RNF121 - ring finger protein 121, PDIA5 - protein disulfide isomerase family a, member 5, ACSL1 - acyl-coa synthetase long-chain family member 1, TMEM173 - transmembrane protein 173, IFNGR2 - interferon gamma receptor 2 (interferon gamma transducer…
GO:0045414	regulation of interleukin-8 biosynthetic process	6.08e-05	0.00298	9.77	5	[BCL3 - b-cell cll/lymphoma 3, TLR8 - toll-like receptor 8, TLR4 - toll-like receptor 4, CLEC7A - c-type lectin domain family 7, member a, KLF4 - kruppel-like factor 4 (gut)]
GO:0002683	negative regulation of immune system process	6.33e-05	0.00309	2.03	34	[DHX58 - dexh (asp-glu-x-his) box polypeptide 58, TYROBP - tyro protein tyrosine kinase binding protein, GPX1 - glutathione peroxidase 1, STAT5B - signal transducer and activator of transcription 5b, HLX - h2.0-like homeobox, CD274 - cd274 molecule, TICAM1 - toll-like receptor adaptor molecule 1, ADAR - adenosine deaminase, rna-specific, CTLA4 - cytotoxic t-lymphocyte-associated protein 4, LDLR -…
GO:0002828	regulation of type 2 immune response	6.53e-05	0.00316	5.41	8	[RSAD2 - radical s-adenosyl methionine domain containing 2, ARG2 - arginase 2, IL18 - interleukin 18 (interferon-gamma-inducing factor), IDO1 - indoleamine 2,3-dioxygenase 1, ANXA1 - annexin a1, CD86 - cd86 molecule, IL6 - interleukin 6 (interferon, beta 2), HLX - h2.0-like homeobox]
GO:0043372	positive regulation of CD4-positive, alpha-beta T cell differentiation	6.53e-05	0.00317	5.41	8	[IL23A - interleukin 23, alpha subunit p19, IL18 - interleukin 18 (interferon-gamma-inducing factor), ZBTB7B - zinc finger and btb domain containing 7b, ANXA1 - annexin a1, FOXP3 - forkhead box p3, CD86 - cd86 molecule, HLX - h2.0-like homeobox, CD80 - cd80 molecule]
GO:0002833	positive regulation of response to biotic stimulus	6.58e-05	0.00318	4.8	9	[DHX58 - dexh (asp-glu-x-his) box polypeptide 58, SASH1 - sam and sh3 domain containing 1, SCIMP - slp adaptor and csk interacting membrane protein, CD180 - cd180 molecule, GRN - granulin, LY86 - lymphocyte antigen 86, DDX60 - dead (asp-glu-ala-asp) box polypeptide 60, CYBA - cytochrome b-245, alpha polypeptide, CD274 - cd274 molecule]
GO:0046514	ceramide catabolic process	6.68e-05	0.00318	7.54	6	[NEU1 - sialidase 1 (lysosomal sialidase), GBA - glucosidase, beta, acid, HEXB - hexosaminidase b (beta polypeptide), PSAP - prosaposin, GM2A - gm2 ganglioside activator, ASAH1 - n-acylsphingosine amidohydrolase (acid ceramidase) 1]
GO:0050718	positive regulation of interleukin-1 beta secretion	6.68e-05	0.00319	7.54	6	[NLRP12 - nlr family, pyrin domain containing 12, P2RX7 - purinergic receptor p2x, ligand-gated ion channel, 7, TLR8 - toll-like receptor 8, TLR4 - toll-like receptor 4, CASP1 - caspase 1, apoptosis-related cysteine peptidase, PYCARD - pyd and card domain containing]
GO:0050716	positive regulation of interleukin-1 secretion	6.68e-05	0.0032	7.54	6	[NLRP12 - nlr family, pyrin domain containing 12, P2RX7 - purinergic receptor p2x, ligand-gated ion channel, 7, TLR8 - toll-like receptor 8, TLR4 - toll-like receptor 4, CASP1 - caspase 1, apoptosis-related cysteine peptidase, PYCARD - pyd and card domain containing]
GO:0032693	negative regulation of interleukin-10 production	6.68e-05	0.00322	7.54	6	[IL23A - interleukin 23, alpha subunit p19, IDO1 - indoleamine 2,3-dioxygenase 1, TYROBP - tyro protein tyrosine kinase binding protein, FOXP3 - forkhead box p3, PDCD1LG2 - programmed cell death 1 ligand 2, CD274 - cd274 molecule]
GO:0030670	phagocytic vesicle membrane	0.000108	0.00334	3.79	11	[LAMP2 - lysosomal-associated membrane protein 2, SLC11A1 - solute carrier family 11 (proton-coupled divalent metal ion transporter), member 1, LAMP1 - lysosomal-associated membrane protein 1, TLR2 - toll-like receptor 2, RAB7B - rab7b, member ras oncogene family, TAP1 - transporter 1, atp-binding cassette, sub-family b (mdr/tap), RAB31 - rab31, member ras oncogene family, RAB20 - rab20, member r…
GO:0050868	negative regulation of T cell activation	7.06e-05	0.00335	3.28	14	[CD274 - cd274 molecule, HLX - h2.0-like homeobox, CTLA4 - cytotoxic t-lymphocyte-associated protein 4, ARG2 - arginase 2, VSIG4 - v-set and immunoglobulin domain containing 4, IDO1 - indoleamine 2,3-dioxygenase 1, ADORA2A - adenosine a2a receptor, ZBTB7B - zinc finger and btb domain containing 7b, ANXA1 - annexin a1, FOXP3 - forkhead box p3, CD86 - cd86 molecule, TIGIT - t cell immunoreceptor wi…
GO:0005125	cytokine activity	6.84e-06	0.00337	3.77	15	[TIMP1 - timp metallopeptidase inhibitor 1, TNFSF15 - tumor necrosis factor (ligand) superfamily, member 15, IL18 - interleukin 18 (interferon-gamma-inducing factor), IL15 - interleukin 15, CSF3 - colony stimulating factor 3 (granulocyte), EBI3 - epstein-barr virus induced 3, IL1A - interleukin 1, alpha, IL23A - interleukin 23, alpha subunit p19, CXCL2 - chemokine (c-x-c motif) ligand 2, NRG1 - n…
GO:0019359	nicotinamide nucleotide biosynthetic process	7.36e-05	0.00345	3.95	11	[GALK1 - galactokinase 1, PFKL - phosphofructokinase, liver, PGM2L1 - phosphoglucomutase 2-like 1, IDO1 - indoleamine 2,3-dioxygenase 1, HK3 - hexokinase 3 (white cell), PARP9 - poly (adp-ribose) polymerase family, member 9, PTGS2 - prostaglandin-endoperoxide synthase 2 (prostaglandin g/h synthase and cyclooxygenase), PARP16 - poly (adp-ribose) polymerase family, member 16, ADPGK - adp-dependent …
GO:0019363	pyridine nucleotide biosynthetic process	7.36e-05	0.00347	3.95	11	[GALK1 - galactokinase 1, PFKL - phosphofructokinase, liver, PGM2L1 - phosphoglucomutase 2-like 1, IDO1 - indoleamine 2,3-dioxygenase 1, HK3 - hexokinase 3 (white cell), PARP9 - poly (adp-ribose) polymerase family, member 9, PTGS2 - prostaglandin-endoperoxide synthase 2 (prostaglandin g/h synthase and cyclooxygenase), PARP16 - poly (adp-ribose) polymerase family, member 16, ADPGK - adp-dependent …
GO:2000514	regulation of CD4-positive, alpha-beta T cell activation	7.36e-05	0.00348	3.95	11	[IL23A - interleukin 23, alpha subunit p19, ARG2 - arginase 2, IL18 - interleukin 18 (interferon-gamma-inducing factor), ZBTB7B - zinc finger and btb domain containing 7b, ANXA1 - annexin a1, IL27 - interleukin 27, FOXP3 - forkhead box p3, CD86 - cd86 molecule, CD274 - cd274 molecule, HLX - h2.0-like homeobox, CD80 - cd80 molecule]
GO:0009612	response to mechanical stimulus	7.97e-05	0.00373	2.75	18	[PKD2 - polycystic kidney disease 2 (autosomal dominant), P2RX7 - purinergic receptor p2x, ligand-gated ion channel, 7, MAP3K14 - mitogen-activated protein kinase kinase kinase 14, MYD88 - myeloid differentiation primary response 88, STAT1 - signal transducer and activator of transcription 1, 91kda, NFKBIA - nuclear factor of kappa light polypeptide gene enhancer in b-cells inhibitor, alpha, JUNB…
GO:0042327	positive regulation of phosphorylation	8e-05	0.00373	1.64	60	[IL18 - interleukin 18 (interferon-gamma-inducing factor), IL15 - interleukin 15, PSAP - prosaposin, IL23A - interleukin 23, alpha subunit p19, TMEM106A - transmembrane protein 106a, NRP1 - neuropilin 1, SLC11A1 - solute carrier family 11 (proton-coupled divalent metal ion transporter), member 1, ACSL1 - acyl-coa synthetase long-chain family member 1, TLR4 - toll-like receptor 4, CHI3L1 - chitina…
GO:0002821	positive regulation of adaptive immune response	8.21e-05	0.00382	3.24	14	[RSAD2 - radical s-adenosyl methionine domain containing 2, IL18 - interleukin 18 (interferon-gamma-inducing factor), P2RX7 - purinergic receptor p2x, ligand-gated ion channel, 7, FCGRT - fc fragment of igg, receptor, transporter, alpha, CD274 - cd274 molecule, HLX - h2.0-like homeobox, B2M - beta-2-microglobulin, IL23A - interleukin 23, alpha subunit p19, SLC11A1 - solute carrier family 11 (prot…
GO:2000379	positive regulation of reactive oxygen species metabolic process	8.41e-05	0.0039	3.41	13	[PKD2 - polycystic kidney disease 2 (autosomal dominant), ICAM1 - intercellular adhesion molecule 1, TYROBP - tyro protein tyrosine kinase binding protein, CLEC7A - c-type lectin domain family 7, member a, AIF1 - allograft inflammatory factor 1, KLF2 - kruppel-like factor 2 (lung), TICAM1 - toll-like receptor adaptor molecule 1, KLF4 - kruppel-like factor 4 (gut), TMEM106A - transmembrane protein…
GO:0004896	cytokine receptor activity	9.02e-06	0.00395	4.16	13	[CCR4 - chemokine (c-c motif) receptor 4, CCR6 - chemokine (c-c motif) receptor 6, CSF2RB - colony stimulating factor 2 receptor, beta, low-affinity (granulocyte-macrophage), CMKLR1 - chemokine-like receptor 1, EBI3 - epstein-barr virus induced 3, IL1RAP - interleukin 1 receptor accessory protein, CSF3R - colony stimulating factor 3 receptor (granulocyte), CCR1 - chemokine (c-c motif) receptor 1,…
GO:0032728	positive regulation of interferon-beta production	8.82e-05	0.00406	5.21	8	[IRF3 - interferon regulatory factor 3, FLOT1 - flotillin 1, IRF7 - interferon regulatory factor 7, TLR2 - toll-like receptor 2, TLR8 - toll-like receptor 8, TLR4 - toll-like receptor 4, DDX58 - dead (asp-glu-ala-asp) box polypeptide 58, TICAM1 - toll-like receptor adaptor molecule 1]
GO:0032731	positive regulation of interleukin-1 beta production	8.82e-05	0.00407	5.21	8	[NLRP12 - nlr family, pyrin domain containing 12, P2RX7 - purinergic receptor p2x, ligand-gated ion channel, 7, TYROBP - tyro protein tyrosine kinase binding protein, TLR8 - toll-like receptor 8, TLR4 - toll-like receptor 4, CLEC7A - c-type lectin domain family 7, member a, CASP1 - caspase 1, apoptosis-related cysteine peptidase, PYCARD - pyd and card domain containing]
GO:0032648	regulation of interferon-beta production	9.19e-05	0.0042	4.19	10	[IRF3 - interferon regulatory factor 3, FLOT1 - flotillin 1, IRF7 - interferon regulatory factor 7, TLR2 - toll-like receptor 2, TLR8 - toll-like receptor 8, NMI - n-myc (and stat) interactor, TLR4 - toll-like receptor 4, DDX58 - dead (asp-glu-ala-asp) box polypeptide 58, PYCARD - pyd and card domain containing, TICAM1 - toll-like receptor adaptor molecule 1]
GO:0043903	regulation of symbiosis, encompassing mutualism through parasitism	9.17e-05	0.00421	2.43	22	[STOM - stomatin, CSF1R - colony stimulating factor 1 receptor, RSAD2 - radical s-adenosyl methionine domain containing 2, IFITM3 - interferon induced transmembrane protein 3, TNIP1 - tnfaip3 interacting protein 1, OASL - 2'-5'-oligoadenylate synthetase-like, P4HB - prolyl 4-hydroxylase, beta polypeptide, ISG20 - interferon stimulated exonuclease gene 20kda, STAT1 - signal transducer and activato…
GO:0043603	cellular amide metabolic process	9.54e-05	0.00435	1.85	41	[NEU1 - sialidase 1 (lysosomal sialidase), NAPEPLD - n-acyl phosphatidylethanolamine phospholipase d, RPL22 - ribosomal protein l22, PSAP - prosaposin, CNDP2 - cndp dipeptidase 2 (metallopeptidase m20 family), SPTLC2 - serine palmitoyltransferase, long chain base subunit 2, GPX1 - glutathione peroxidase 1, ACSL1 - acyl-coa synthetase long-chain family member 1, RPL10 - ribosomal protein l10, ARG2…
GO:0042590	antigen processing and presentation of exogenous peptide antigen via MHC class I	9.74e-05	0.00442	3.58	12	[PSME1 - proteasome (prosome, macropain) activator subunit 1 (pa28 alpha), FCGR1A - fc fragment of igg, high affinity ia, receptor (cd64), PSME2 - proteasome (prosome, macropain) activator subunit 2 (pa28 beta), PSMA5 - proteasome (prosome, macropain) subunit, alpha type, 5, PSMB9 - proteasome (prosome, macropain) subunit, beta type, 9, TAP1 - transporter 1, atp-binding cassette, sub-family b (md…
GO:0002819	regulation of adaptive immune response	0.0001	0.00454	2.71	18	[RSAD2 - radical s-adenosyl methionine domain containing 2, IL18 - interleukin 18 (interferon-gamma-inducing factor), P2RX7 - purinergic receptor p2x, ligand-gated ion channel, 7, CD48 - cd48 molecule, FCGRT - fc fragment of igg, receptor, transporter, alpha, CD274 - cd274 molecule, HLX - h2.0-like homeobox, B2M - beta-2-microglobulin, IL23A - interleukin 23, alpha subunit p19, SLC11A1 - solute c…
GO:0050792	regulation of viral process	0.000101	0.00455	2.48	21	[CSF1R - colony stimulating factor 1 receptor, STOM - stomatin, RSAD2 - radical s-adenosyl methionine domain containing 2, IFITM3 - interferon induced transmembrane protein 3, TNIP1 - tnfaip3 interacting protein 1, OASL - 2'-5'-oligoadenylate synthetase-like, P4HB - prolyl 4-hydroxylase, beta polypeptide, ISG20 - interferon stimulated exonuclease gene 20kda, STAT1 - signal transducer and activato…
GO:0033209	tumor necrosis factor-mediated signaling pathway	0.000102	0.00457	3.03	15	[TNFSF15 - tumor necrosis factor (ligand) superfamily, member 15, PSME1 - proteasome (prosome, macropain) activator subunit 1 (pa28 alpha), MAP3K14 - mitogen-activated protein kinase kinase kinase 14, PSMA5 - proteasome (prosome, macropain) subunit, alpha type, 5, PSME2 - proteasome (prosome, macropain) activator subunit 2 (pa28 beta), NFKBIA - nuclear factor of kappa light polypeptide gene enhan…
GO:0045597	positive regulation of cell differentiation	0.000106	0.00471	1.66	56	[AP2A1 - adaptor-related protein complex 2, alpha 1 subunit, NAPEPLD - n-acyl phosphatidylethanolamine phospholipase d, IL18 - interleukin 18 (interferon-gamma-inducing factor), IL15 - interleukin 15, FN1 - fibronectin 1, HLX - h2.0-like homeobox, IL23A - interleukin 23, alpha subunit p19, NRP1 - neuropilin 1, JAG1 - jagged 1, TLR2 - toll-like receptor 2, BTG1 - b-cell translocation gene 1, anti-…
GO:0035455	response to interferon-alpha	0.000106	0.00472	7.03	6	[ADAR - adenosine deaminase, rna-specific, BST2 - bone marrow stromal cell antigen 2, IFNAR1 - interferon (alpha, beta and omega) receptor 1, IFITM3 - interferon induced transmembrane protein 3, MX2 - myxovirus (influenza virus) resistance 2 (mouse), EIF2AK2 - eukaryotic translation initiation factor 2-alpha kinase 2]
GO:0002825	regulation of T-helper 1 type immune response	0.000107	0.00472	5.86	7	[IL23A - interleukin 23, alpha subunit p19, SLC11A1 - solute carrier family 11 (proton-coupled divalent metal ion transporter), member 1, IL18 - interleukin 18 (interferon-gamma-inducing factor), ANXA1 - annexin a1, IL27 - interleukin 27, HLX - h2.0-like homeobox, CD80 - cd80 molecule]
GO:0008285	negative regulation of cell proliferation	0.000107	0.00473	1.84	41	[PKD2 - polycystic kidney disease 2 (autosomal dominant), IL15 - interleukin 15, TYROBP - tyro protein tyrosine kinase binding protein, STAT1 - signal transducer and activator of transcription 1, 91kda, MORC3 - morc family cw-type zinc finger 3, PRDX4 - peroxiredoxin 4, CD274 - cd274 molecule, B2M - beta-2-microglobulin, ARG2 - arginase 2, CTLA4 - cytotoxic t-lymphocyte-associated protein 4, IDO1…
GO:0002827	positive regulation of T-helper 1 type immune response	0.000106	0.00474	7.03	6	[IL23A - interleukin 23, alpha subunit p19, SLC11A1 - solute carrier family 11 (proton-coupled divalent metal ion transporter), member 1, IL18 - interleukin 18 (interferon-gamma-inducing factor), ANXA1 - annexin a1, HLX - h2.0-like homeobox, CD80 - cd80 molecule]
GO:0034142	toll-like receptor 4 signaling pathway	0.000106	0.00475	7.03	6	[CD14 - cd14 molecule, SCIMP - slp adaptor and csk interacting membrane protein, TLR4 - toll-like receptor 4, NFKBIA - nuclear factor of kappa light polypeptide gene enhancer in b-cells inhibitor, alpha, TNIP3 - tnfaip3 interacting protein 3, PIK3AP1 - phosphoinositide-3-kinase adaptor protein 1]
GO:0006959	humoral immune response	0.00011	0.00484	3.16	14	[CCR6 - chemokine (c-c motif) receptor 6, SERPING1 - serpin peptidase inhibitor, clade g (c1 inhibitor), member 1, EBI3 - epstein-barr virus induced 3, S100A8 - s100 calcium binding protein a8, TREM1 - triggering receptor expressed on myeloid cells 1, C2 - complement component 2, SLC11A1 - solute carrier family 11 (proton-coupled divalent metal ion transporter), member 1, CFD - complement factor …
GO:0050710	negative regulation of cytokine secretion	0.000114	0.00494	4.09	10	[GHSR - growth hormone secretagogue receptor, TNFRSF4 - tumor necrosis factor receptor superfamily, member 4, ARG2 - arginase 2, NLRP12 - nlr family, pyrin domain containing 12, FN1 - fibronectin 1, PML - promyelocytic leukemia, ANXA1 - annexin a1, TLR8 - toll-like receptor 8, FOXP3 - forkhead box p3, SRGN - serglycin]
GO:0030162	regulation of proteolysis	0.000114	0.00494	1.76	46	[CST6 - cystatin e/m, TIMP1 - timp metallopeptidase inhibitor 1, PSME1 - proteasome (prosome, macropain) activator subunit 1 (pa28 alpha), CSTB - cystatin b (stefin b), LGMN - legumain, PSME2 - proteasome (prosome, macropain) activator subunit 2 (pa28 beta), FN1 - fibronectin 1, CAPN3 - calpain 3, (p94), CLEC7A - c-type lectin domain family 7, member a, GPX1 - glutathione peroxidase 1, BST2 - bon…
GO:0007154	cell communication	0.000113	0.00495	1.85	40	[PKD2 - polycystic kidney disease 2 (autosomal dominant), RALB - v-ral simian leukemia viral oncogene homolog b, ICAM1 - intercellular adhesion molecule 1, IL18 - interleukin 18 (interferon-gamma-inducing factor), IL15 - interleukin 15, FCHSD2 - fch and double sh3 domains 2, CCR1 - chemokine (c-c motif) receptor 1, NRP1 - neuropilin 1, GRB2 - growth factor receptor-bound protein 2, KCNQ3 - potass…
GO:0032655	regulation of interleukin-12 production	0.000114	0.00495	4.09	10	[IL23A - interleukin 23, alpha subunit p19, IDO1 - indoleamine 2,3-dioxygenase 1, CMKLR1 - chemokine-like receptor 1, TLR2 - toll-like receptor 2, SCIMP - slp adaptor and csk interacting membrane protein, TLR4 - toll-like receptor 4, TLR8 - toll-like receptor 8, CLEC7A - c-type lectin domain family 7, member a, NFKB1 - nuclear factor of kappa light polypeptide gene enhancer in b-cells 1, TIGIT - …
GO:0046479	glycosphingolipid catabolic process	0.000116	0.00496	8.79	5	[NEU1 - sialidase 1 (lysosomal sialidase), GBA - glucosidase, beta, acid, HEXB - hexosaminidase b (beta polypeptide), PSAP - prosaposin, GM2A - gm2 ganglioside activator]
GO:0045428	regulation of nitric oxide biosynthetic process	0.000114	0.00497	4.09	10	[ICAM1 - intercellular adhesion molecule 1, PKD2 - polycystic kidney disease 2 (autosomal dominant), RAC1 - ras-related c3 botulinum toxin substrate 1 (rho family, small gtp binding protein rac1), TLR4 - toll-like receptor 4, PTGS2 - prostaglandin-endoperoxide synthase 2 (prostaglandin g/h synthase and cyclooxygenase), CLEC7A - c-type lectin domain family 7, member a, AIF1 - allograft inflammator…
GO:0042107	cytokine metabolic process	0.000116	0.00497	8.79	5	[IRF3 - interferon regulatory factor 3, TNFSF15 - tumor necrosis factor (ligand) superfamily, member 15, IL18 - interleukin 18 (interferon-gamma-inducing factor), IRF7 - interferon regulatory factor 7, IL1RAP - interleukin 1 receptor accessory protein]
GO:0034341	response to interferon-gamma	0.000115	0.00498	3.31	13	[IFITM3 - interferon induced transmembrane protein 3, UBD - ubiquitin d, STAT1 - signal transducer and activator of transcription 1, 91kda, TRIM21 - tripartite motif containing 21, AIF1 - allograft inflammatory factor 1, RAB20 - rab20, member ras oncogene family, SLC11A1 - solute carrier family 11 (proton-coupled divalent metal ion transporter), member 1, BST2 - bone marrow stromal cell antigen 2…
GO:0022407	regulation of cell-cell adhesion	0.000116	0.00498	2.04	31	[ICAM1 - intercellular adhesion molecule 1, FLOT1 - flotillin 1, IL18 - interleukin 18 (interferon-gamma-inducing factor), IL15 - interleukin 15, EBI3 - epstein-barr virus induced 3, STAT5B - signal transducer and activator of transcription 5b, HLX - h2.0-like homeobox, CD274 - cd274 molecule, IL23A - interleukin 23, alpha subunit p19, CTLA4 - cytotoxic t-lymphocyte-associated protein 4, ARG2 - a…
GO:0030667	secretory granule membrane	0.000183	0.00546	2.27	23	[STOM - stomatin, LAMP2 - lysosomal-associated membrane protein 2, LAMP1 - lysosomal-associated membrane protein 1, TYROBP - tyro protein tyrosine kinase binding protein, GAA - glucosidase, alpha; acid, CD53 - cd53 molecule, PSAP - prosaposin, CLEC5A - c-type lectin domain family 5, member a, SLC11A1 - solute carrier family 11 (proton-coupled divalent metal ion transporter), member 1, TMEM173 - t…
GO:0036021	endolysosome lumen	0.000183	0.00555	17.58	3	[LGMN - legumain, CTSB - cathepsin b, CTSS - cathepsin s]
GO:1904813	ficolin-1-rich granule lumen	0.000191	0.00561	2.76	16	[CTSH - cathepsin h, CSTB - cystatin b (stefin b), PSMA5 - proteasome (prosome, macropain) subunit, alpha type, 5, HK3 - hexokinase 3 (white cell), CTSB - cathepsin b, MVP - major vault protein, OSTF1 - osteoclast stimulating factor 1, CTSZ - cathepsin z, GNS - glucosamine (n-acetyl)-6-sulfatase, CTSS - cathepsin s, PRDX4 - peroxiredoxin 4, CFD - complement factor d (adipsin), PFKL - phosphofruct…
GO:0042325	regulation of phosphorylation	0.000132	0.00563	1.47	85	[IL18 - interleukin 18 (interferon-gamma-inducing factor), IL15 - interleukin 15, FN1 - fibronectin 1, PSAP - prosaposin, TMEM106A - transmembrane protein 106a, IL23A - interleukin 23, alpha subunit p19, ACSL1 - acyl-coa synthetase long-chain family member 1, SLC11A1 - solute carrier family 11 (proton-coupled divalent metal ion transporter), member 1, NRP1 - neuropilin 1, PML - promyelocytic leuk…
GO:0019882	antigen processing and presentation	0.000135	0.00572	2.43	21	[AP1S3 - adaptor-related protein complex 1, sigma 3 subunit, ICAM1 - intercellular adhesion molecule 1, AP2A1 - adaptor-related protein complex 2, alpha 1 subunit, CTSH - cathepsin h, PSME1 - proteasome (prosome, macropain) activator subunit 1 (pa28 alpha), LGMN - legumain, PSMA5 - proteasome (prosome, macropain) subunit, alpha type, 5, PSME2 - proteasome (prosome, macropain) activator subunit 2 …
GO:0042116	macrophage activation	0.000138	0.00583	4.4	9	[TMEM106A - transmembrane protein 106a, SLC11A1 - solute carrier family 11 (proton-coupled divalent metal ion transporter), member 1, TYROBP - tyro protein tyrosine kinase binding protein, TLR2 - toll-like receptor 2, GRN - granulin, TLR8 - toll-like receptor 8, TLR4 - toll-like receptor 4, AIF1 - allograft inflammatory factor 1, TICAM1 - toll-like receptor adaptor molecule 1]
GO:0048521	negative regulation of behavior	0.000142	0.00585	11.72	4	[GHSR - growth hormone secretagogue receptor, NAPEPLD - n-acyl phosphatidylethanolamine phospholipase d, RETN - resistin, TRH - thyrotropin-releasing hormone]
GO:0006687	glycosphingolipid metabolic process	0.00014	0.00587	4	10	[NEU1 - sialidase 1 (lysosomal sialidase), B4GALT3 - udp-gal:betaglcnac beta 1,4- galactosyltransferase, polypeptide 3, GBA - glucosidase, beta, acid, ST8SIA4 - st8 alpha-n-acetyl-neuraminide alpha-2,8-sialyltransferase 4, HEXB - hexosaminidase b (beta polypeptide), A4GALT - alpha 1,4-galactosyltransferase, PSAP - prosaposin, GM2A - gm2 ganglioside activator, ASAH1 - n-acylsphingosine amidohydrol…
GO:0014048	regulation of glutamate secretion	0.000142	0.00587	11.72	4	[P2RX7 - purinergic receptor p2x, ligand-gated ion channel, 7, ADORA2A - adenosine a2a receptor, TRH - thyrotropin-releasing hormone, KMO - kynurenine 3-monooxygenase (kynurenine 3-hydroxylase)]
GO:0045937	positive regulation of phosphate metabolic process	0.00014	0.00588	1.6	62	[IL18 - interleukin 18 (interferon-gamma-inducing factor), IL15 - interleukin 15, PSAP - prosaposin, IL23A - interleukin 23, alpha subunit p19, TMEM106A - transmembrane protein 106a, NRP1 - neuropilin 1, SLC11A1 - solute carrier family 11 (proton-coupled divalent metal ion transporter), member 1, ACSL1 - acyl-coa synthetase long-chain family member 1, TLR4 - toll-like receptor 4, CHI3L1 - chitina…
GO:0032819	positive regulation of natural killer cell proliferation	0.000142	0.00589	11.72	4	[IL23A - interleukin 23, alpha subunit p19, IL18 - interleukin 18 (interferon-gamma-inducing factor), IL15 - interleukin 15, STAT5B - signal transducer and activator of transcription 5b]
GO:0010562	positive regulation of phosphorus metabolic process	0.00014	0.0059	1.6	62	[IL18 - interleukin 18 (interferon-gamma-inducing factor), IL15 - interleukin 15, PSAP - prosaposin, IL23A - interleukin 23, alpha subunit p19, TMEM106A - transmembrane protein 106a, NRP1 - neuropilin 1, SLC11A1 - solute carrier family 11 (proton-coupled divalent metal ion transporter), member 1, ACSL1 - acyl-coa synthetase long-chain family member 1, TLR4 - toll-like receptor 4, CHI3L1 - chitina…
GO:0045357	regulation of interferon-beta biosynthetic process	0.000142	0.00591	11.72	4	[NMI - n-myc (and stat) interactor, TLR8 - toll-like receptor 8, TLR4 - toll-like receptor 4, TICAM1 - toll-like receptor adaptor molecule 1]
GO:0039528	cytoplasmic pattern recognition receptor signaling pathway in response to virus	0.000142	0.00593	11.72	4	[IRF3 - interferon regulatory factor 3, TMEM173 - transmembrane protein 173, IRF7 - interferon regulatory factor 7, DDX58 - dead (asp-glu-ala-asp) box polypeptide 58]
GO:0062023	collagen-containing extracellular matrix	0.000207	0.00598	2.3	22	[ICAM1 - intercellular adhesion molecule 1, CTSH - cathepsin h, TIMP1 - timp metallopeptidase inhibitor 1, CSTB - cystatin b (stefin b), LGALS3BP - lectin, galactoside-binding, soluble, 3 binding protein, FN1 - fibronectin 1, CTSB - cathepsin b, SERPING1 - serpin peptidase inhibitor, clade g (c1 inhibitor), member 1, CTSZ - cathepsin z, EGFL7 - egf-like-domain, multiple 7, PSAP - prosaposin, ASPN…
GO:0050730	regulation of peptidyl-tyrosine phosphorylation	0.000146	0.006	2.36	22	[CSF1R - colony stimulating factor 1 receptor, ICAM1 - intercellular adhesion molecule 1, IL18 - interleukin 18 (interferon-gamma-inducing factor), CSF3 - colony stimulating factor 3 (granulocyte), IL15 - interleukin 15, SOCS3 - suppressor of cytokine signaling 3, MVP - major vault protein, ADAM17 - adam metallopeptidase domain 17, ARHGEF2 - rho/rac guanine nucleotide exchange factor (gef) 2, IL2…
GO:0050709	negative regulation of protein secretion	0.000146	0.006	3.08	14	[RSAD2 - radical s-adenosyl methionine domain containing 2, FN1 - fibronectin 1, SRGN - serglycin, GHSR - growth hormone secretagogue receptor, TNFRSF4 - tumor necrosis factor receptor superfamily, member 4, PFKL - phosphofructokinase, liver, ARG2 - arginase 2, NLRP12 - nlr family, pyrin domain containing 12, PML - promyelocytic leukemia, ANXA1 - annexin a1, TLR8 - toll-like receptor 8, FOXP3 - f…
GO:1901652	response to peptide	0.000146	0.006	2.07	29	[ICAM1 - intercellular adhesion molecule 1, TIMP1 - timp metallopeptidase inhibitor 1, LGMN - legumain, STAT2 - signal transducer and activator of transcription 2, 113kda, STAT1 - signal transducer and activator of transcription 1, 91kda, STAT5B - signal transducer and activator of transcription 5b, KLF2 - kruppel-like factor 2 (lung), STAT5A - signal transducer and activator of transcription 5a,…
GO:0042110	T cell activation	0.000148	0.00604	2.48	20	[RSAD2 - radical s-adenosyl methionine domain containing 2, ICAM1 - intercellular adhesion molecule 1, CCR6 - chemokine (c-c motif) receptor 6, P2RX7 - purinergic receptor p2x, ligand-gated ion channel, 7, IL15 - interleukin 15, RPL22 - ribosomal protein l22, CLEC7A - c-type lectin domain family 7, member a, EBI3 - epstein-barr virus induced 3, STAT5B - signal transducer and activator of transcri…
GO:0050829	defense response to Gram-negative bacterium	0.000149	0.00606	5.59	7	[IL23A - interleukin 23, alpha subunit p19, SLC11A1 - solute carrier family 11 (proton-coupled divalent metal ion transporter), member 1, TLR4 - toll-like receptor 4, MPEG1 - macrophage expressed 1, IL6 - interleukin 6 (interferon, beta 2), PYCARD - pyd and card domain containing, IL6R - interleukin 6 receptor]
GO:0032647	regulation of interferon-alpha production	0.000149	0.00608	5.59	7	[IRF3 - interferon regulatory factor 3, IRF7 - interferon regulatory factor 7, NMI - n-myc (and stat) interactor, TLR8 - toll-like receptor 8, TLR4 - toll-like receptor 4, STAT1 - signal transducer and activator of transcription 1, 91kda, DDX58 - dead (asp-glu-ala-asp) box polypeptide 58]
GO:1904724	tertiary granule lumen	0.000215	0.00612	4.16	9	[CTSH - cathepsin h, CSTB - cystatin b (stefin b), TNFAIP6 - tumor necrosis factor, alpha-induced protein 6, CFP - complement factor properdin, CHIT1 - chitinase 1 (chitotriosidase), OSCAR - osteoclast associated, immunoglobulin-like receptor, CTSS - cathepsin s, ASAH1 - n-acylsphingosine amidohydrolase (acid ceramidase) 1, B2M - beta-2-microglobulin]
GO:1901342	regulation of vasculature development	0.000153	0.00621	2.21	25	[STAT1 - signal transducer and activator of transcription 1, 91kda, KLF2 - kruppel-like factor 2 (lung), SPHK1 - sphingosine kinase 1, SEMA4A - sema domain, immunoglobulin domain (ig), transmembrane domain (tm) and short cytoplasmic domain, (semaphorin) 4a, NRP1 - neuropilin 1, PML - promyelocytic leukemia, SASH1 - sam and sh3 domain containing 1, GRN - granulin, PTGS2 - prostaglandin-endoperoxid…
GO:0032732	positive regulation of interleukin-1 production	0.000154	0.00622	4.85	8	[NLRP12 - nlr family, pyrin domain containing 12, P2RX7 - purinergic receptor p2x, ligand-gated ion channel, 7, TYROBP - tyro protein tyrosine kinase binding protein, TLR4 - toll-like receptor 4, TLR8 - toll-like receptor 8, CLEC7A - c-type lectin domain family 7, member a, CASP1 - caspase 1, apoptosis-related cysteine peptidase, PYCARD - pyd and card domain containing]
GO:0010243	response to organonitrogen compound	0.000154	0.00622	1.66	53	[TIMP1 - timp metallopeptidase inhibitor 1, LGMN - legumain, ABCA1 - atp-binding cassette, sub-family a (abc1), member 1, TICAM1 - toll-like receptor adaptor molecule 1, RNF121 - ring finger protein 121, LDLR - low density lipoprotein receptor, JAG1 - jagged 1, TLR2 - toll-like receptor 2, TLR4 - toll-like receptor 4, BTG1 - b-cell translocation gene 1, anti-proliferative, SELL - selectin l, RRAG…
GO:0046718	viral entry into host cell	0.000156	0.00622	3.65	11	[TNFRSF4 - tumor necrosis factor receptor superfamily, member 4, ICAM1 - intercellular adhesion molecule 1, LAMP1 - lysosomal-associated membrane protein 1, UVRAG - uv radiation resistance associated, LDLR - low density lipoprotein receptor, SCARB2 - scavenger receptor class b, member 2, CTSB - cathepsin b, GPR15 - g protein-coupled receptor 15, CD86 - cd86 molecule, CLEC5A - c-type lectin domain…
GO:0002690	positive regulation of leukocyte chemotaxis	0.000156	0.00624	3.65	11	[IL23A - interleukin 23, alpha subunit p19, CCR6 - chemokine (c-c motif) receptor 6, LGMN - legumain, CMKLR1 - chemokine-like receptor 1, RAC1 - ras-related c3 botulinum toxin substrate 1 (rho family, small gtp binding protein rac1), IL8 - interleukin 8, ADAM17 - adam metallopeptidase domain 17, AIF1 - allograft inflammatory factor 1, CCR1 - chemokine (c-c motif) receptor 1, IL6 - interleukin 6 (…
GO:0002824	positive regulation of adaptive immune response based on somatic recombination of immune receptors built from immunoglobulin superfamily domains	0.000156	0.00625	3.22	13	[RSAD2 - radical s-adenosyl methionine domain containing 2, IL18 - interleukin 18 (interferon-gamma-inducing factor), P2RX7 - purinergic receptor p2x, ligand-gated ion channel, 7, FCGRT - fc fragment of igg, receptor, transporter, alpha, CD274 - cd274 molecule, HLX - h2.0-like homeobox, B2M - beta-2-microglobulin, IL23A - interleukin 23, alpha subunit p19, SLC11A1 - solute carrier family 11 (prot…
GO:0072593	reactive oxygen species metabolic process	0.000156	0.00627	3.22	13	[SH3PXD2B - sh3 and px domains 2b, P2RX7 - purinergic receptor p2x, ligand-gated ion channel, 7, MT3 - metallothionein 3, GPX1 - glutathione peroxidase 1, PRDX4 - peroxiredoxin 4, ARG2 - arginase 2, SOD2 - superoxide dismutase 2, mitochondrial, TLR2 - toll-like receptor 2, NRROS - negative regulator of reactive oxygen species, CYP1B1 - cytochrome p450, family 1, subfamily b, polypeptide 1, CYBA -…
GO:0022603	regulation of anatomical structure morphogenesis	0.000159	0.00631	1.6	60	[ZSWIM4 - zinc finger, swim-type containing 4, AP2A1 - adaptor-related protein complex 2, alpha 1 subunit, FN1 - fibronectin 1, SEMA4A - sema domain, immunoglobulin domain (ig), transmembrane domain (tm) and short cytoplasmic domain, (semaphorin) 4a, VPS35 - vacuolar protein sorting 35 homolog (s. cerevisiae), NRP1 - neuropilin 1, KEL - kell blood group, metallo-endopeptidase, JAG1 - jagged 1, PM…
GO:0045766	positive regulation of angiogenesis	0.000164	0.0065	2.69	17	[CTSH - cathepsin h, SPHK1 - sphingosine kinase 1, IL1A - interleukin 1, alpha, KLF4 - kruppel-like factor 4 (gut), GHSR - growth hormone secretagogue receptor, NRP1 - neuropilin 1, SASH1 - sam and sh3 domain containing 1, ANXA1 - annexin a1, GRN - granulin, IL8 - interleukin 8, HMOX1 - heme oxygenase (decycling) 1, PTGS2 - prostaglandin-endoperoxide synthase 2 (prostaglandin g/h synthase and cyc…
GO:0002792	negative regulation of peptide secretion	0.000167	0.0066	3.04	14	[RSAD2 - radical s-adenosyl methionine domain containing 2, FN1 - fibronectin 1, SRGN - serglycin, GHSR - growth hormone secretagogue receptor, TNFRSF4 - tumor necrosis factor receptor superfamily, member 4, PFKL - phosphofructokinase, liver, ARG2 - arginase 2, NLRP12 - nlr family, pyrin domain containing 12, PML - promyelocytic leukemia, ANXA1 - annexin a1, TLR8 - toll-like receptor 8, FOXP3 - f…
GO:0042509	regulation of tyrosine phosphorylation of STAT protein	0.000171	0.0067	3.91	10	[CSF1R - colony stimulating factor 1 receptor, IL23A - interleukin 23, alpha subunit p19, IL18 - interleukin 18 (interferon-gamma-inducing factor), TNFRSF1A - tumor necrosis factor receptor superfamily, member 1a, IL15 - interleukin 15, SOCS3 - suppressor of cytokine signaling 3, PARP14 - poly (adp-ribose) polymerase family, member 14, PARP9 - poly (adp-ribose) polymerase family, member 9, IL6 - …
GO:0034103	regulation of tissue remodeling	0.000171	0.00672	3.91	10	[CSF1R - colony stimulating factor 1 receptor, VDR - vitamin d (1,25- dihydroxyvitamin d3) receptor, IL23A - interleukin 23, alpha subunit p19, P2RX7 - purinergic receptor p2x, ligand-gated ion channel, 7, IL18 - interleukin 18 (interferon-gamma-inducing factor), ATP6AP1 - atpase, h+ transporting, lysosomal accessory protein 1, IL15 - interleukin 15, S1PR1 - sphingosine-1-phosphate receptor 1, SU…
GO:0031012	extracellular matrix	0.000245	0.00686	2.14	25	[ICAM1 - intercellular adhesion molecule 1, TIMP1 - timp metallopeptidase inhibitor 1, CSTB - cystatin b (stefin b), LGALS3BP - lectin, galactoside-binding, soluble, 3 binding protein, FN1 - fibronectin 1, EGFL7 - egf-like-domain, multiple 7, ASPN - asporin, PSAP - prosaposin, CD180 - cd180 molecule, AGRN - agrin, CHI3L1 - chitinase 3-like 1 (cartilage glycoprotein-39), CTSH - cathepsin h, CTSB -…
GO:0035578	azurophil granule lumen	0.000256	0.00706	3.25	12	[HEXB - hexosaminidase b (beta polypeptide), HMHA1 - histocompatibility (minor) ha-1, ANXA2 - annexin a2, DNAJC3 - dnaj (hsp40) homolog, subfamily c, member 3, RETN - resistin, GRN - granulin, TOLLIP - toll interacting protein, GNS - glucosamine (n-acetyl)-6-sulfatase, GM2A - gm2 ganglioside activator, CECR1 - cat eye syndrome chromosome region, candidate 1, TXNDC5 - thioredoxin domain containing…
GO:2000252	negative regulation of feeding behavior	0.000183	0.00714	17.58	3	[NAPEPLD - n-acyl phosphatidylethanolamine phospholipase d, RETN - resistin, TRH - thyrotropin-releasing hormone]
GO:2001280	positive regulation of unsaturated fatty acid biosynthetic process	0.000183	0.00716	17.58	3	[ANXA1 - annexin a1, PTGS2 - prostaglandin-endoperoxide synthase 2 (prostaglandin g/h synthase and cyclooxygenase), ABCD1 - atp-binding cassette, sub-family d (ald), member 1]
GO:0070555	response to interleukin-1	0.000188	0.00733	3.35	12	[ICAM1 - intercellular adhesion molecule 1, HNMT - histamine n-methyltransferase, MYD88 - myeloid differentiation primary response 88, ANXA1 - annexin a1, IL8 - interleukin 8, NFKB1 - nuclear factor of kappa light polypeptide gene enhancer in b-cells 1, KLF2 - kruppel-like factor 2 (lung), CYBA - cytochrome b-245, alpha polypeptide, CHI3L1 - chitinase 3-like 1 (cartilage glycoprotein-39), PYCARD …
GO:0072524	pyridine-containing compound metabolic process	0.000192	0.00743	3	14	[GALK1 - galactokinase 1, PGM2L1 - phosphoglucomutase 2-like 1, HK3 - hexokinase 3 (white cell), PGD - phosphogluconate dehydrogenase, PDXK - pyridoxal (pyridoxine, vitamin b6) kinase, PFKL - phosphofructokinase, liver, IDO1 - indoleamine 2,3-dioxygenase 1, PARP9 - poly (adp-ribose) polymerase family, member 9, PTGS2 - prostaglandin-endoperoxide synthase 2 (prostaglandin g/h synthase and cyclooxy…
GO:1904951	positive regulation of establishment of protein localization	0.000193	0.00743	1.96	32	[FFAR2 - free fatty acid receptor 2, CLEC5A - c-type lectin domain family 5, member a, CD274 - cd274 molecule, TNFRSF4 - tumor necrosis factor receptor superfamily, member 4, VPS35 - vacuolar protein sorting 35 homolog (s. cerevisiae), LEPROT - leptin receptor overlapping transcript, CD14 - cd14 molecule, TLR2 - toll-like receptor 2, TLR4 - toll-like receptor 4, TLR8 - toll-like receptor 8, PTGS2…
GO:0051048	negative regulation of secretion	0.000193	0.00745	2.57	18	[RSAD2 - radical s-adenosyl methionine domain containing 2, FN1 - fibronectin 1, TRH - thyrotropin-releasing hormone, SRGN - serglycin, TNFRSF4 - tumor necrosis factor receptor superfamily, member 4, GHSR - growth hormone secretagogue receptor, ARG2 - arginase 2, PFKL - phosphofructokinase, liver, NLRP12 - nlr family, pyrin domain containing 12, NRG1 - neuregulin 1, TNFRSF1A - tumor necrosis fact…
GO:0050866	negative regulation of cell activation	0.000197	0.00757	2.49	19	[TYROBP - tyro protein tyrosine kinase binding protein, CD274 - cd274 molecule, HLX - h2.0-like homeobox, VSIG4 - v-set and immunoglobulin domain containing 4, LDLR - low density lipoprotein receptor, ARG2 - arginase 2, CTLA4 - cytotoxic t-lymphocyte-associated protein 4, IDO1 - indoleamine 2,3-dioxygenase 1, ADORA2A - adenosine a2a receptor, ZBTB7B - zinc finger and btb domain containing 7b, ANX…
GO:0031663	lipopolysaccharide-mediated signaling pathway	0.0002	0.00764	4.69	8	[IRF3 - interferon regulatory factor 3, HCK - hemopoietic cell kinase, IL18 - interleukin 18 (interferon-gamma-inducing factor), CD14 - cd14 molecule, TLR2 - toll-like receptor 2, NFKBIA - nuclear factor of kappa light polypeptide gene enhancer in b-cells inhibitor, alpha, TLR4 - toll-like receptor 4, TICAM1 - toll-like receptor adaptor molecule 1]
GO:2000516	positive regulation of CD4-positive, alpha-beta T cell activation	0.0002	0.00766	4.69	8	[IL23A - interleukin 23, alpha subunit p19, IL18 - interleukin 18 (interferon-gamma-inducing factor), ZBTB7B - zinc finger and btb domain containing 7b, ANXA1 - annexin a1, FOXP3 - forkhead box p3, CD86 - cd86 molecule, HLX - h2.0-like homeobox, CD80 - cd80 molecule]
GO:0019377	glycolipid catabolic process	0.000203	0.00769	7.99	5	[NEU1 - sialidase 1 (lysosomal sialidase), GBA - glucosidase, beta, acid, HEXB - hexosaminidase b (beta polypeptide), PSAP - prosaposin, GM2A - gm2 ganglioside activator]
GO:0046640	regulation of alpha-beta T cell proliferation	0.000204	0.0077	5.35	7	[IL23A - interleukin 23, alpha subunit p19, ARG2 - arginase 2, IL18 - interleukin 18 (interferon-gamma-inducing factor), ZBTB7B - zinc finger and btb domain containing 7b, ZAP70 - zeta-chain (tcr) associated protein kinase 70kda, EBI3 - epstein-barr virus induced 3, CD274 - cd274 molecule]
GO:0045072	regulation of interferon-gamma biosynthetic process	0.000203	0.00771	7.99	5	[IL27 - interleukin 27, TLR8 - toll-like receptor 8, FOXP3 - forkhead box p3, CLEC7A - c-type lectin domain family 7, member a, EBI3 - epstein-barr virus induced 3]
GO:0042534	regulation of tumor necrosis factor biosynthetic process	0.000204	0.00772	5.35	7	[GHSR - growth hormone secretagogue receptor, BCL3 - b-cell cll/lymphoma 3, TYROBP - tyro protein tyrosine kinase binding protein, MAPKAPK2 - mitogen-activated protein kinase-activated protein kinase 2, TLR4 - toll-like receptor 4, CLEC7A - c-type lectin domain family 7, member a, CYBB - cytochrome b-245, beta polypeptide]
GO:1903531	negative regulation of secretion by cell	0.000205	0.00772	2.65	17	[RSAD2 - radical s-adenosyl methionine domain containing 2, FN1 - fibronectin 1, TRH - thyrotropin-releasing hormone, SRGN - serglycin, GHSR - growth hormone secretagogue receptor, TNFRSF4 - tumor necrosis factor receptor superfamily, member 4, ARG2 - arginase 2, PFKL - phosphofructokinase, liver, NLRP12 - nlr family, pyrin domain containing 12, TNFRSF1A - tumor necrosis factor receptor superfami…
GO:0006670	sphingosine metabolic process	0.000203	0.00773	7.99	5	[GBA - glucosidase, beta, acid, SGPP2 - sphingosine-1-phosphate phosphatase 2, SPTLC2 - serine palmitoyltransferase, long chain base subunit 2, SPHK1 - sphingosine kinase 1, ASAH1 - n-acylsphingosine amidohydrolase (acid ceramidase) 1]
GO:0030334	regulation of cell migration	0.000207	0.00778	1.66	51	[TIMP1 - timp metallopeptidase inhibitor 1, LGMN - legumain, FN1 - fibronectin 1, AAMP - angio-associated, migratory cell protein, CD274 - cd274 molecule, IL23A - interleukin 23, alpha subunit p19, SEMA4A - sema domain, immunoglobulin domain (ig), transmembrane domain (tm) and short cytoplasmic domain, (semaphorin) 4a, NRP1 - neuropilin 1, BST2 - bone marrow stromal cell antigen 2, JAG1 - jagged …
GO:0005783	endoplasmic reticulum	0.00029	0.00786	1.56	61	[UNC93B1 - unc-93 homolog b1 (c. elegans), PDIA4 - protein disulfide isomerase family a, member 4, ACSL1 - acyl-coa synthetase long-chain family member 1, RPL10 - ribosomal protein l10, ORMDL2 - orm1-like 2 (s. cerevisiae), RPL6 - ribosomal protein l6, IFNGR2 - interferon gamma receptor 2 (interferon gamma transducer 1), CKAP4 - cytoskeleton-associated protein 4, CHI3L1 - chitinase 3-like 1 (cart…
GO:0061134	peptidase regulator activity	2e-05	0.00787	3.04	18	[CST6 - cystatin e/m, CTSH - cathepsin h, PSME1 - proteasome (prosome, macropain) activator subunit 1 (pa28 alpha), TIMP1 - timp metallopeptidase inhibitor 1, CSTB - cystatin b (stefin b), MT3 - metallothionein 3, FN1 - fibronectin 1, PSME2 - proteasome (prosome, macropain) activator subunit 2 (pa28 beta), SERPING1 - serpin peptidase inhibitor, clade g (c1 inhibitor), member 1, CFLAR - casp8 and …
GO:1903708	positive regulation of hemopoiesis	0.000217	0.00812	2.41	20	[IL18 - interleukin 18 (interferon-gamma-inducing factor), CSF3 - colony stimulating factor 3 (granulocyte), IL15 - interleukin 15, ATP6AP1 - atpase, h+ transporting, lysosomal accessory protein 1, TYROBP - tyro protein tyrosine kinase binding protein, STAT1 - signal transducer and activator of transcription 1, 91kda, MMP14 - matrix metallopeptidase 14 (membrane-inserted), STAT5B - signal transdu…
GO:0044409	entry into host	0.00022	0.00815	3.3	12	[TNFRSF4 - tumor necrosis factor receptor superfamily, member 4, ICAM1 - intercellular adhesion molecule 1, LAMP1 - lysosomal-associated membrane protein 1, UVRAG - uv radiation resistance associated, LDLR - low density lipoprotein receptor, GRB2 - growth factor receptor-bound protein 2, SCARB2 - scavenger receptor class b, member 2, CTSB - cathepsin b, GPR15 - g protein-coupled receptor 15, CD86…
GO:0030260	entry into host cell	0.00022	0.00817	3.3	12	[TNFRSF4 - tumor necrosis factor receptor superfamily, member 4, ICAM1 - intercellular adhesion molecule 1, LAMP1 - lysosomal-associated membrane protein 1, UVRAG - uv radiation resistance associated, LDLR - low density lipoprotein receptor, GRB2 - growth factor receptor-bound protein 2, SCARB2 - scavenger receptor class b, member 2, CTSB - cathepsin b, GPR15 - g protein-coupled receptor 15, CD86…
GO:0051806	entry into cell of other organism involved in symbiotic interaction	0.00022	0.00819	3.3	12	[TNFRSF4 - tumor necrosis factor receptor superfamily, member 4, ICAM1 - intercellular adhesion molecule 1, LAMP1 - lysosomal-associated membrane protein 1, UVRAG - uv radiation resistance associated, LDLR - low density lipoprotein receptor, GRB2 - growth factor receptor-bound protein 2, SCARB2 - scavenger receptor class b, member 2, CTSB - cathepsin b, GPR15 - g protein-coupled receptor 15, CD86…
GO:0051828	entry into other organism involved in symbiotic interaction	0.00022	0.00821	3.3	12	[TNFRSF4 - tumor necrosis factor receptor superfamily, member 4, ICAM1 - intercellular adhesion molecule 1, LAMP1 - lysosomal-associated membrane protein 1, UVRAG - uv radiation resistance associated, LDLR - low density lipoprotein receptor, GRB2 - growth factor receptor-bound protein 2, SCARB2 - scavenger receptor class b, member 2, CTSB - cathepsin b, GPR15 - g protein-coupled receptor 15, CD86…
GO:0042599	lamellar body	0.000316	0.00832	10.05	4	[LAMP1 - lysosomal-associated membrane protein 1, CTSH - cathepsin h, CKAP4 - cytoskeleton-associated protein 4, SMPD1 - sphingomyelin phosphodiesterase 1, acid lysosomal]
GO:0030673	axolemma	0.000316	0.00844	10.05	4	[ADORA2A - adenosine a2a receptor, THY1 - thy-1 cell surface antigen, EPB41L3 - erythrocyte membrane protein band 4.1-like 3, SLC1A2 - solute carrier family 1 (glial high affinity glutamate transporter), member 2]
GO:0070201	regulation of establishment of protein localization	0.00023	0.00848	1.71	46	[FFAR2 - free fatty acid receptor 2, FN1 - fibronectin 1, SRGN - serglycin, CLEC5A - c-type lectin domain family 5, member a, CD274 - cd274 molecule, TNFRSF4 - tumor necrosis factor receptor superfamily, member 4, VPS35 - vacuolar protein sorting 35 homolog (s. cerevisiae), ARG2 - arginase 2, LEPROT - leptin receptor overlapping transcript, CD14 - cd14 molecule, PML - promyelocytic leukemia, TLR2…
GO:0023057	negative regulation of signaling	0.000231	0.00852	1.5	73	[DHX58 - dexh (asp-glu-x-his) box polypeptide 58, LGMN - legumain, EGFL7 - egf-like-domain, multiple 7, TICAM1 - toll-like receptor adaptor molecule 1, NRP1 - neuropilin 1, LEPROT - leptin receptor overlapping transcript, JAG1 - jagged 1, TLR4 - toll-like receptor 4, GSTO1 - glutathione s-transferase omega 1, PYCARD - pyd and card domain containing, SIGIRR - single immunoglobulin and toll-interle…
GO:0032727	positive regulation of interferon-alpha production	0.000238	0.0087	6.21	6	[IRF3 - interferon regulatory factor 3, IRF7 - interferon regulatory factor 7, TLR8 - toll-like receptor 8, TLR4 - toll-like receptor 4, STAT1 - signal transducer and activator of transcription 1, 91kda, DDX58 - dead (asp-glu-ala-asp) box polypeptide 58]
GO:0045076	regulation of interleukin-2 biosynthetic process	0.000238	0.00872	6.21	6	[FOXP3 - forkhead box p3, CLEC7A - c-type lectin domain family 7, member a, CD86 - cd86 molecule, STAT5B - signal transducer and activator of transcription 5b, IL1A - interleukin 1, alpha, CD80 - cd80 molecule]
GO:0043123	positive regulation of I-kappaB kinase/NF-kappaB signaling	0.00024	0.00872	2.46	19	[MAP3K14 - mitogen-activated protein kinase kinase kinase 14, MYD88 - myeloid differentiation primary response 88, UBD - ubiquitin d, NEK6 - nima-related kinase 6, SHISA5 - shisa family member 5, CFLAR - casp8 and fadd-like apoptosis regulator, RBCK1 - ranbp-type and c3hc4-type zinc finger containing 1, TICAM1 - toll-like receptor adaptor molecule 1, IL1A - interleukin 1, alpha, IKBKB - inhibitor…
GO:0048002	antigen processing and presentation of peptide antigen	0.00024	0.00875	2.46	19	[AP1S3 - adaptor-related protein complex 1, sigma 3 subunit, AP2A1 - adaptor-related protein complex 2, alpha 1 subunit, PSME1 - proteasome (prosome, macropain) activator subunit 1 (pa28 alpha), LGMN - legumain, PSMA5 - proteasome (prosome, macropain) subunit, alpha type, 5, PSME2 - proteasome (prosome, macropain) activator subunit 2 (pa28 beta), AP2S1 - adaptor-related protein complex 2, sigma 1…
GO:0031904	endosome lumen	0.00034	0.00882	5.86	6	[LRPAP1 - low density lipoprotein receptor-related protein associated protein 1, CTSH - cathepsin h, LGMN - legumain, CTSB - cathepsin b, CTSS - cathepsin s, B2M - beta-2-microglobulin]
GO:0014070	response to organic cyclic compound	0.000247	0.00898	1.72	45	[P2RY13 - purinergic receptor p2y, g-protein coupled, 13, RALB - v-ral simian leukemia viral oncogene homolog b, ICAM1 - intercellular adhesion molecule 1, PKD2 - polycystic kidney disease 2 (autosomal dominant), FLOT1 - flotillin 1, IL18 - interleukin 18 (interferon-gamma-inducing factor), IL15 - interleukin 15, STAT1 - signal transducer and activator of transcription 1, 91kda, JUNB - jun b prot…
GO:0050921	positive regulation of chemotaxis	0.000249	0.00902	2.93	14	[CCR4 - chemokine (c-c motif) receptor 4, CCR6 - chemokine (c-c motif) receptor 6, LGMN - legumain, CMKLR1 - chemokine-like receptor 1, AIF1 - allograft inflammatory factor 1, ADAM17 - adam metallopeptidase domain 17, CCR1 - chemokine (c-c motif) receptor 1, IL23A - interleukin 23, alpha subunit p19, NRP1 - neuropilin 1, S1PR1 - sphingosine-1-phosphate receptor 1, IL8 - interleukin 8, RAC1 - ras-…
GO:0002718	regulation of cytokine production involved in immune response	0.000256	0.00924	3.25	12	[RSAD2 - radical s-adenosyl methionine domain containing 2, FFAR2 - free fatty acid receptor 2, BST2 - bone marrow stromal cell antigen 2, IL18 - interleukin 18 (interferon-gamma-inducing factor), SCIMP - slp adaptor and csk interacting membrane protein, HMOX1 - heme oxygenase (decycling) 1, TLR4 - toll-like receptor 4, FOXP3 - forkhead box p3, DDX58 - dead (asp-glu-ala-asp) box polypeptide 58, I…
GO:0046513	ceramide biosynthetic process	0.000256	0.00925	4.54	8	[B4GALT3 - udp-gal:betaglcnac beta 1,4- galactosyltransferase, polypeptide 3, GBA - glucosidase, beta, acid, ST8SIA4 - st8 alpha-n-acetyl-neuraminide alpha-2,8-sialyltransferase 4, P2RX7 - purinergic receptor p2x, ligand-gated ion channel, 7, SPTLC2 - serine palmitoyltransferase, long chain base subunit 2, CERS4 - ceramide synthase 4, ASAH1 - n-acylsphingosine amidohydrolase (acid ceramidase) 1, …
GO:0038024	cargo receptor activity	2.59e-05	0.00925	4.06	12	[AP2A1 - adaptor-related protein complex 2, alpha 1 subunit, LDLR - low density lipoprotein receptor, LGALS3BP - lectin, galactoside-binding, soluble, 3 binding protein, FOLR1 - folate receptor 1 (adult), SCARB2 - scavenger receptor class b, member 2, CD163 - cd163 molecule, AP2S1 - adaptor-related protein complex 2, sigma 1 subunit, HIP1R - huntingtin interacting protein 1 related, LDLRAP1 - low…
GO:0030662	coated vesicle membrane	0.000361	0.00925	2.97	13	[AP2A1 - adaptor-related protein complex 2, alpha 1 subunit, SCARB2 - scavenger receptor class b, member 2, AP2S1 - adaptor-related protein complex 2, sigma 1 subunit, SEC23IP - sec23 interacting protein, B2M - beta-2-microglobulin, LDLR - low density lipoprotein receptor, FCGR1A - fc fragment of igg, high affinity ia, receptor (cd64), FOLR1 - folate receptor 1 (adult), SLC18A1 - solute carrier f…
GO:0016504	peptidase activator activity	2.84e-05	0.00933	5.27	9	[CTSH - cathepsin h, PSME1 - proteasome (prosome, macropain) activator subunit 1 (pa28 alpha), NLRP12 - nlr family, pyrin domain containing 12, PSME2 - proteasome (prosome, macropain) activator subunit 2 (pa28 beta), FN1 - fibronectin 1, CLPX - clpx caseinolytic peptidase x homolog (e. coli), CFLAR - casp8 and fadd-like apoptosis regulator, CASP1 - caspase 1, apoptosis-related cysteine peptidase,…
GO:0002479	antigen processing and presentation of exogenous peptide antigen via MHC class I, TAP-dependent	0.000262	0.0094	3.45	11	[PSME1 - proteasome (prosome, macropain) activator subunit 1 (pa28 alpha), FCGR1A - fc fragment of igg, high affinity ia, receptor (cd64), PSME2 - proteasome (prosome, macropain) activator subunit 2 (pa28 beta), PSMA5 - proteasome (prosome, macropain) subunit, alpha type, 5, PSMB9 - proteasome (prosome, macropain) subunit, beta type, 9, TAP1 - transporter 1, atp-binding cassette, sub-family b (md…
GO:0046638	positive regulation of alpha-beta T cell differentiation	0.000266	0.00949	4.06	9	[IL23A - interleukin 23, alpha subunit p19, IL18 - interleukin 18 (interferon-gamma-inducing factor), ZBTB7B - zinc finger and btb domain containing 7b, ANXA1 - annexin a1, ZAP70 - zeta-chain (tcr) associated protein kinase 70kda, FOXP3 - forkhead box p3, CD86 - cd86 molecule, HLX - h2.0-like homeobox, CD80 - cd80 molecule]
GO:0045595	regulation of cell differentiation	0.000265	0.0095	1.43	88	[ZSWIM4 - zinc finger, swim-type containing 4, AP2A1 - adaptor-related protein complex 2, alpha 1 subunit, IL18 - interleukin 18 (interferon-gamma-inducing factor), NAPEPLD - n-acyl phosphatidylethanolamine phospholipase d, IL15 - interleukin 15, FN1 - fibronectin 1, CAPN3 - calpain 3, (p94), ABCA1 - atp-binding cassette, sub-family a (abc1), member 1, HLX - h2.0-like homeobox, IL23A - interleuki…
GO:0009435	NAD biosynthetic process	0.000266	0.00951	4.06	9	[PFKL - phosphofructokinase, liver, PGM2L1 - phosphoglucomutase 2-like 1, IDO1 - indoleamine 2,3-dioxygenase 1, HK3 - hexokinase 3 (white cell), PARP9 - poly (adp-ribose) polymerase family, member 9, PTGS2 - prostaglandin-endoperoxide synthase 2 (prostaglandin g/h synthase and cyclooxygenase), PARP16 - poly (adp-ribose) polymerase family, member 16, ADPGK - adp-dependent glucokinase, KMO - kynure…
GO:0002474	antigen processing and presentation of peptide antigen via MHC class I	0.000276	0.00979	3.05	13	[PSME1 - proteasome (prosome, macropain) activator subunit 1 (pa28 alpha), PSMA5 - proteasome (prosome, macropain) subunit, alpha type, 5, PSME2 - proteasome (prosome, macropain) activator subunit 2 (pa28 beta), PSMB9 - proteasome (prosome, macropain) subunit, beta type, 9, PSMB8 - proteasome (prosome, macropain) subunit, beta type, 8, FCGRT - fc fragment of igg, receptor, transporter, alpha, IFI…
GO:0017144	drug metabolic process	0.000276	0.00981	1.86	35	[GALK1 - galactokinase 1, TPMT - thiopurine s-methyltransferase, PGM2L1 - phosphoglucomutase 2-like 1, PRPS2 - phosphoribosyl pyrophosphate synthetase 2, CHPT1 - choline phosphotransferase 1, SDHD - succinate dehydrogenase complex, subunit d, integral membrane protein, AKR7A2 - aldo-keto reductase family 7, member a2 (aflatoxin aldehyde reductase), GPX1 - glutathione peroxidase 1, STAT5B - signal…
GO:0016477	cell migration	0.000286	0.0101	1.71	45	[CCR4 - chemokine (c-c motif) receptor 4, ICAM1 - intercellular adhesion molecule 1, CCR6 - chemokine (c-c motif) receptor 6, FFAR2 - free fatty acid receptor 2, FN1 - fibronectin 1, AAMP - angio-associated, migratory cell protein, GPX1 - glutathione peroxidase 1, ADAM17 - adam metallopeptidase domain 17, STAT5B - signal transducer and activator of transcription 5b, CCR1 - chemokine (c-c motif) r…
GO:0098590	plasma membrane region	0.000401	0.0101	1.62	51	[AP2A1 - adaptor-related protein complex 2, alpha 1 subunit, NAPEPLD - n-acyl phosphatidylethanolamine phospholipase d, FN1 - fibronectin 1, BMX - bmx non-receptor tyrosine kinase, ABCG2 - atp-binding cassette, sub-family g (white), member 2, LDLR - low density lipoprotein receptor, BST2 - bone marrow stromal cell antigen 2, JAG1 - jagged 1, LDLRAP1 - low density lipoprotein receptor adaptor prot…
GO:0009968	negative regulation of signal transduction	0.000289	0.0102	1.51	69	[DHX58 - dexh (asp-glu-x-his) box polypeptide 58, LGMN - legumain, EGFL7 - egf-like-domain, multiple 7, TICAM1 - toll-like receptor adaptor molecule 1, NRP1 - neuropilin 1, LEPROT - leptin receptor overlapping transcript, JAG1 - jagged 1, TLR4 - toll-like receptor 4, GSTO1 - glutathione s-transferase omega 1, PYCARD - pyd and card domain containing, SIGIRR - single immunoglobulin and toll-interle…
GO:0006643	membrane lipid metabolic process	0.00029	0.0102	2.49	18	[NEU1 - sialidase 1 (lysosomal sialidase), GBA - glucosidase, beta, acid, SGPP2 - sphingosine-1-phosphate phosphatase 2, P2RX7 - purinergic receptor p2x, ligand-gated ion channel, 7, PSAP - prosaposin, SPTLC2 - serine palmitoyltransferase, long chain base subunit 2, SPHK1 - sphingosine kinase 1, B4GALT3 - udp-gal:betaglcnac beta 1,4- galactosyltransferase, polypeptide 3, ORMDL2 - orm1-like 2 (s. …
GO:0046649	lymphocyte activation	0.000298	0.0105	2.02	28	[ICAM1 - intercellular adhesion molecule 1, CCR6 - chemokine (c-c motif) receptor 6, IL18 - interleukin 18 (interferon-gamma-inducing factor), IL15 - interleukin 15, RPL22 - ribosomal protein l22, CLEC7A - c-type lectin domain family 7, member a, EBI3 - epstein-barr virus induced 3, STAT5B - signal transducer and activator of transcription 5b, ADAM17 - adam metallopeptidase domain 17, TNFRSF4 - t…
GO:0030665	clathrin-coated vesicle membrane	0.000425	0.0106	3.52	10	[AP2A1 - adaptor-related protein complex 2, alpha 1 subunit, LDLR - low density lipoprotein receptor, FCGR1A - fc fragment of igg, high affinity ia, receptor (cd64), SCARB2 - scavenger receptor class b, member 2, SLC18A1 - solute carrier family 18 (vesicular monoamine transporter), member 1, AP2S1 - adaptor-related protein complex 2, sigma 1 subunit, HIP1R - huntingtin interacting protein 1 relat…
GO:0010604	positive regulation of macromolecule metabolic process	0.000306	0.0107	1.28	153	[IL18 - interleukin 18 (interferon-gamma-inducing factor), IL15 - interleukin 15, LGMN - legumain, FN1 - fibronectin 1, DTX3L - deltex 3-like (drosophila), PSAP - prosaposin, EBI3 - epstein-barr virus induced 3, TICAM1 - toll-like receptor adaptor molecule 1, TMEM106A - transmembrane protein 106a, NRP1 - neuropilin 1, LDLR - low density lipoprotein receptor, TMEM173 - transmembrane protein 173, P…
GO:2000116	regulation of cysteine-type endopeptidase activity	0.000313	0.0109	2.34	20	[TNFSF15 - tumor necrosis factor (ligand) superfamily, member 15, CTSH - cathepsin h, LGMN - legumain, MT3 - metallothionein 3, PSMB9 - proteasome (prosome, macropain) subunit, beta type, 9, CFLAR - casp8 and fadd-like apoptosis regulator, CLEC7A - c-type lectin domain family 7, member a, GPX1 - glutathione peroxidase 1, S100A8 - s100 calcium binding protein a8, KLF4 - kruppel-like factor 4 (gut)…
GO:0090336	positive regulation of brown fat cell differentiation	0.000316	0.0109	10.05	4	[METRNL - meteorin, glial cell differentiation regulator-like, NAPEPLD - n-acyl phosphatidylethanolamine phospholipase d, ZBTB7B - zinc finger and btb domain containing 7b, PTGS2 - prostaglandin-endoperoxide synthase 2 (prostaglandin g/h synthase and cyclooxygenase)]
GO:0034127	regulation of MyD88-independent toll-like receptor signaling pathway	0.000316	0.011	10.05	4	[CD14 - cd14 molecule, IRF7 - interferon regulatory factor 7, TLR4 - toll-like receptor 4, TICAM1 - toll-like receptor adaptor molecule 1]
GO:0032817	regulation of natural killer cell proliferation	0.000316	0.011	10.05	4	[IL23A - interleukin 23, alpha subunit p19, IL18 - interleukin 18 (interferon-gamma-inducing factor), IL15 - interleukin 15, STAT5B - signal transducer and activator of transcription 5b]
GO:0002730	regulation of dendritic cell cytokine production	0.000331	0.0114	7.33	5	[BST2 - bone marrow stromal cell antigen 2, SCIMP - slp adaptor and csk interacting membrane protein, TLR4 - toll-like receptor 4, DDX58 - dead (asp-glu-ala-asp) box polypeptide 58, TICAM1 - toll-like receptor adaptor molecule 1]
GO:0046519	sphingoid metabolic process	0.000331	0.0114	7.33	5	[GBA - glucosidase, beta, acid, SGPP2 - sphingosine-1-phosphate phosphatase 2, SPTLC2 - serine palmitoyltransferase, long chain base subunit 2, SPHK1 - sphingosine kinase 1, ASAH1 - n-acylsphingosine amidohydrolase (acid ceramidase) 1]
GO:2000484	positive regulation of interleukin-8 secretion	0.000331	0.0115	7.33	5	[FFAR2 - free fatty acid receptor 2, CD14 - cd14 molecule, TLR2 - toll-like receptor 2, TLR4 - toll-like receptor 4, PYCARD - pyd and card domain containing]
GO:0035577	azurophil granule membrane	0.000481	0.0116	3.77	9	[STOM - stomatin, LAMP2 - lysosomal-associated membrane protein 2, LAMP1 - lysosomal-associated membrane protein 1, BST2 - bone marrow stromal cell antigen 2, PRCP - prolylcarboxypeptidase (angiotensinase c), GAA - glucosidase, alpha; acid, PSAP - prosaposin, SURF4 - surfeit 4, CKAP4 - cytoskeleton-associated protein 4]
GO:0035456	response to interferon-beta	0.00034	0.0117	5.86	6	[UBE2G2 - ubiquitin-conjugating enzyme e2g 2, TMEM173 - transmembrane protein 173, BST2 - bone marrow stromal cell antigen 2, IFITM3 - interferon induced transmembrane protein 3, STAT1 - signal transducer and activator of transcription 1, 91kda, PLSCR1 - phospholipid scramblase 1]
GO:0043235	receptor complex	0.000474	0.0117	2.05	25	[EBI3 - epstein-barr virus induced 3, B2M - beta-2-microglobulin, NRP1 - neuropilin 1, LDLR - low density lipoprotein receptor, CD14 - cd14 molecule, SCIMP - slp adaptor and csk interacting membrane protein, TLR2 - toll-like receptor 2, TOLLIP - toll interacting protein, TLR4 - toll-like receptor 4, CSF1R - colony stimulating factor 1 receptor, VDR - vitamin d (1,25- dihydroxyvitamin d3) receptor…
GO:0010648	negative regulation of cell communication	0.000348	0.0119	1.49	72	[DHX58 - dexh (asp-glu-x-his) box polypeptide 58, LGMN - legumain, EGFL7 - egf-like-domain, multiple 7, TICAM1 - toll-like receptor adaptor molecule 1, NRP1 - neuropilin 1, LEPROT - leptin receptor overlapping transcript, JAG1 - jagged 1, TLR4 - toll-like receptor 4, GSTO1 - glutathione s-transferase omega 1, PYCARD - pyd and card domain containing, SIGIRR - single immunoglobulin and toll-interle…
GO:0097190	apoptotic signaling pathway	0.000351	0.012	2.17	23	[LAMP1 - lysosomal-associated membrane protein 1, P2RX7 - purinergic receptor p2x, ligand-gated ion channel, 7, DAXX - death-domain associated protein, TYROBP - tyro protein tyrosine kinase binding protein, SHISA5 - shisa family member 5, CFLAR - casp8 and fadd-like apoptosis regulator, SRGN - serglycin, TICAM1 - toll-like receptor adaptor molecule 1, IL1A - interleukin 1, alpha, BCL3 - b-cell cl…
GO:0046636	negative regulation of alpha-beta T cell activation	0.000363	0.0122	4.92	7	[ARG2 - arginase 2, ADORA2A - adenosine a2a receptor, ZBTB7B - zinc finger and btb domain containing 7b, ANXA1 - annexin a1, FOXP3 - forkhead box p3, HLX - h2.0-like homeobox, CD274 - cd274 molecule]
GO:0019362	pyridine nucleotide metabolic process	0.000361	0.0123	2.97	13	[GALK1 - galactokinase 1, PGM2L1 - phosphoglucomutase 2-like 1, HK3 - hexokinase 3 (white cell), PGD - phosphogluconate dehydrogenase, PFKL - phosphofructokinase, liver, IDO1 - indoleamine 2,3-dioxygenase 1, PTGS2 - prostaglandin-endoperoxide synthase 2 (prostaglandin g/h synthase and cyclooxygenase), PARP9 - poly (adp-ribose) polymerase family, member 9, PARP16 - poly (adp-ribose) polymerase fam…
GO:0046496	nicotinamide nucleotide metabolic process	0.000361	0.0123	2.97	13	[GALK1 - galactokinase 1, PGM2L1 - phosphoglucomutase 2-like 1, HK3 - hexokinase 3 (white cell), PGD - phosphogluconate dehydrogenase, PFKL - phosphofructokinase, liver, IDO1 - indoleamine 2,3-dioxygenase 1, PARP9 - poly (adp-ribose) polymerase family, member 9, PTGS2 - prostaglandin-endoperoxide synthase 2 (prostaglandin g/h synthase and cyclooxygenase), PARP16 - poly (adp-ribose) polymerase fam…
GO:0043330	response to exogenous dsRNA	0.000363	0.0123	4.92	7	[IRF3 - interferon regulatory factor 3, RALB - v-ral simian leukemia viral oncogene homolog b, TMEM173 - transmembrane protein 173, FLOT1 - flotillin 1, NFKBIA - nuclear factor of kappa light polypeptide gene enhancer in b-cells inhibitor, alpha, DDX58 - dead (asp-glu-ala-asp) box polypeptide 58, TICAM1 - toll-like receptor adaptor molecule 1]
GO:0032814	regulation of natural killer cell activation	0.000363	0.0123	4.92	7	[IL23A - interleukin 23, alpha subunit p19, LAMP1 - lysosomal-associated membrane protein 1, IL18 - interleukin 18 (interferon-gamma-inducing factor), IL15 - interleukin 15, TYROBP - tyro protein tyrosine kinase binding protein, STAT5B - signal transducer and activator of transcription 5b, TICAM1 - toll-like receptor adaptor molecule 1]
GO:0043370	regulation of CD4-positive, alpha-beta T cell differentiation	0.000397	0.0133	3.86	9	[IL23A - interleukin 23, alpha subunit p19, IL18 - interleukin 18 (interferon-gamma-inducing factor), ZBTB7B - zinc finger and btb domain containing 7b, ANXA1 - annexin a1, IL27 - interleukin 27, FOXP3 - forkhead box p3, CD86 - cd86 molecule, HLX - h2.0-like homeobox, CD80 - cd80 molecule]
GO:0002720	positive regulation of cytokine production involved in immune response	0.000397	0.0133	3.86	9	[RSAD2 - radical s-adenosyl methionine domain containing 2, FFAR2 - free fatty acid receptor 2, IL18 - interleukin 18 (interferon-gamma-inducing factor), SCIMP - slp adaptor and csk interacting membrane protein, TLR4 - toll-like receptor 4, DDX58 - dead (asp-glu-ala-asp) box polypeptide 58, IL6 - interleukin 6 (interferon, beta 2), TICAM1 - toll-like receptor adaptor molecule 1, B2M - beta-2-micr…
GO:0051173	positive regulation of nitrogen compound metabolic process	0.000397	0.0134	1.28	147	[IL18 - interleukin 18 (interferon-gamma-inducing factor), IL15 - interleukin 15, LGMN - legumain, FN1 - fibronectin 1, DTX3L - deltex 3-like (drosophila), PSAP - prosaposin, EBI3 - epstein-barr virus induced 3, TICAM1 - toll-like receptor adaptor molecule 1, TMEM106A - transmembrane protein 106a, NRP1 - neuropilin 1, LDLR - low density lipoprotein receptor, TMEM173 - transmembrane protein 173, P…
GO:0006935	chemotaxis	0.000403	0.0134	2.2	22	[CCR4 - chemokine (c-c motif) receptor 4, CCR6 - chemokine (c-c motif) receptor 6, FFAR2 - free fatty acid receptor 2, CMKLR1 - chemokine-like receptor 1, CSF3R - colony stimulating factor 3 receptor (granulocyte), S100A8 - s100 calcium binding protein a8, CCR1 - chemokine (c-c motif) receptor 1, IL1A - interleukin 1, alpha, SEMA4A - sema domain, immunoglobulin domain (ig), transmembrane domain (…
GO:0042592	homeostatic process	0.000403	0.0135	1.48	73	[IL18 - interleukin 18 (interferon-gamma-inducing factor), NAPEPLD - n-acyl phosphatidylethanolamine phospholipase d, CAPN3 - calpain 3, (p94), PDIA4 - protein disulfide isomerase family a, member 4, ABCA1 - atp-binding cassette, sub-family a (abc1), member 1, ABCG2 - atp-binding cassette, sub-family g (white), member 2, PDIA5 - protein disulfide isomerase family a, member 5, SLC11A1 - solute car…
GO:0002711	positive regulation of T cell mediated immunity	0.000407	0.0135	4.26	8	[IL23A - interleukin 23, alpha subunit p19, RSAD2 - radical s-adenosyl methionine domain containing 2, P2RX7 - purinergic receptor p2x, ligand-gated ion channel, 7, IL18 - interleukin 18 (interferon-gamma-inducing factor), FOXP3 - forkhead box p3, FCGRT - fc fragment of igg, receptor, transporter, alpha, IL6 - interleukin 6 (interferon, beta 2), B2M - beta-2-microglobulin]
GO:0051248	negative regulation of protein metabolic process	0.000413	0.0137	1.53	63	[CST6 - cystatin e/m, TIMP1 - timp metallopeptidase inhibitor 1, CSTB - cystatin b (stefin b), CAPN3 - calpain 3, (p94), DTX3L - deltex 3-like (drosophila), VPS35 - vacuolar protein sorting 35 homolog (s. cerevisiae), LDLR - low density lipoprotein receptor, BST2 - bone marrow stromal cell antigen 2, PML - promyelocytic leukemia, SPI1 - spleen focus forming virus (sffv) proviral integration oncog…
GO:0030148	sphingolipid biosynthetic process	0.000421	0.0139	3.28	11	[GBA - glucosidase, beta, acid, B4GALT3 - udp-gal:betaglcnac beta 1,4- galactosyltransferase, polypeptide 3, SGPP2 - sphingosine-1-phosphate phosphatase 2, ST8SIA4 - st8 alpha-n-acetyl-neuraminide alpha-2,8-sialyltransferase 4, P2RX7 - purinergic receptor p2x, ligand-gated ion channel, 7, A4GALT - alpha 1,4-galactosyltransferase, SPTLC2 - serine palmitoyltransferase, long chain base subunit 2, CE…
GO:0006909	phagocytosis	0.000425	0.014	3.52	10	[SLC11A1 - solute carrier family 11 (proton-coupled divalent metal ion transporter), member 1, LDLR - low density lipoprotein receptor, CD14 - cd14 molecule, ADORA2A - adenosine a2a receptor, CDC42SE1 - cdc42 small effector 1, TYROBP - tyro protein tyrosine kinase binding protein, MYD88 - myeloid differentiation primary response 88, ANXA1 - annexin a1, TLR4 - toll-like receptor 4, TXNDC5 - thiore…
GO:0046635	positive regulation of alpha-beta T cell activation	0.000425	0.014	3.52	10	[IL23A - interleukin 23, alpha subunit p19, IL18 - interleukin 18 (interferon-gamma-inducing factor), ZBTB7B - zinc finger and btb domain containing 7b, ANXA1 - annexin a1, ZAP70 - zeta-chain (tcr) associated protein kinase 70kda, FOXP3 - forkhead box p3, EBI3 - epstein-barr virus induced 3, CD86 - cd86 molecule, HLX - h2.0-like homeobox, CD80 - cd80 molecule]
GO:0008083	growth factor activity	4.7e-05	0.0142	3.84	12	[TIMP1 - timp metallopeptidase inhibitor 1, NRG1 - neuregulin 1, CSF3 - colony stimulating factor 3 (granulocyte), JAG1 - jagged 1, GRN - granulin, GMFG - glia maturation factor, gamma, TGFA - transforming growth factor, alpha, AMBN - ameloblastin (enamel matrix protein), HBEGF - heparin-binding egf-like growth factor, CD320 - cd320 molecule, CECR1 - cat eye syndrome chromosome region, candidate …
GO:0009888	tissue development	0.000455	0.0149	1.87	32	[EMP1 - epithelial membrane protein 1, PKD2 - polycystic kidney disease 2 (autosomal dominant), CST6 - cystatin e/m, BMX - bmx non-receptor tyrosine kinase, STAT1 - signal transducer and activator of transcription 1, 91kda, ASPN - asporin, SPTLC2 - serine palmitoyltransferase, long chain base subunit 2, GPX1 - glutathione peroxidase 1, SRGN - serglycin, JUNB - jun b proto-oncogene, STAT5B - signa…
GO:1903706	regulation of hemopoiesis	0.000457	0.015	1.81	35	[PSME1 - proteasome (prosome, macropain) activator subunit 1 (pa28 alpha), IL18 - interleukin 18 (interferon-gamma-inducing factor), IL15 - interleukin 15, PSME2 - proteasome (prosome, macropain) activator subunit 2 (pa28 beta), TYROBP - tyro protein tyrosine kinase binding protein, STAT1 - signal transducer and activator of transcription 1, 91kda, STAT5B - signal transducer and activator of tran…
GO:1901566	organonitrogen compound biosynthetic process	0.000469	0.0153	1.57	55	[IL18 - interleukin 18 (interferon-gamma-inducing factor), RPL22 - ribosomal protein l22, CNDP2 - cndp dipeptidase 2 (metallopeptidase m20 family), TMEM106A - transmembrane protein 106a, ACSL1 - acyl-coa synthetase long-chain family member 1, RPL10 - ribosomal protein l10, RPL6 - ribosomal protein l6, IDO1 - indoleamine 2,3-dioxygenase 1, AGRN - agrin, UPP1 - uridine phosphorylase 1, GSTO1 - glut…
GO:0042330	taxis	0.000472	0.0153	2.17	22	[CCR4 - chemokine (c-c motif) receptor 4, FFAR2 - free fatty acid receptor 2, CCR6 - chemokine (c-c motif) receptor 6, CMKLR1 - chemokine-like receptor 1, CSF3R - colony stimulating factor 3 receptor (granulocyte), S100A8 - s100 calcium binding protein a8, CCR1 - chemokine (c-c motif) receptor 1, IL1A - interleukin 1, alpha, SEMA4A - sema domain, immunoglobulin domain (ig), transmembrane domain (…
GO:0097066	response to thyroid hormone	0.000473	0.0153	5.55	6	[GHSR - growth hormone secretagogue receptor, CTSH - cathepsin h, GBA - glucosidase, beta, acid, ANXA2 - annexin a2, CTSB - cathepsin b, CTSS - cathepsin s]
GO:0045923	positive regulation of fatty acid metabolic process	0.000473	0.0153	5.55	6	[GHSR - growth hormone secretagogue receptor, CPT1A - carnitine palmitoyltransferase 1a (liver), PLIN5 - perilipin 5, ANXA1 - annexin a1, PTGS2 - prostaglandin-endoperoxide synthase 2 (prostaglandin g/h synthase and cyclooxygenase), ABCD1 - atp-binding cassette, sub-family d (ald), member 1]
GO:0002756	MyD88-independent toll-like receptor signaling pathway	0.000472	0.0154	4.73	7	[IRF3 - interferon regulatory factor 3, CD14 - cd14 molecule, IRF7 - interferon regulatory factor 7, TNIP3 - tnfaip3 interacting protein 3, TLR4 - toll-like receptor 4, TICAM1 - toll-like receptor adaptor molecule 1, IKBKB - inhibitor of kappa light polypeptide gene enhancer in b-cells, kinase beta]
GO:0046006	regulation of activated T cell proliferation	0.000472	0.0154	4.73	7	[IL23A - interleukin 23, alpha subunit p19, IL18 - interleukin 18 (interferon-gamma-inducing factor), FOXP3 - forkhead box p3, STAT5B - signal transducer and activator of transcription 5b, PDCD1LG2 - programmed cell death 1 ligand 2, PYCARD - pyd and card domain containing, CD274 - cd274 molecule]
GO:0002521	leukocyte differentiation	0.000478	0.0154	2.09	24	[CSF1R - colony stimulating factor 1 receptor, RSAD2 - radical s-adenosyl methionine domain containing 2, CCR6 - chemokine (c-c motif) receptor 6, IL15 - interleukin 15, CSF3 - colony stimulating factor 3 (granulocyte), RPL22 - ribosomal protein l22, TYROBP - tyro protein tyrosine kinase binding protein, UBD - ubiquitin d, OSTM1 - osteopetrosis associated transmembrane protein 1, JUNB - jun b pro…
GO:0051250	negative regulation of lymphocyte activation	0.000494	0.0159	2.64	15	[TYROBP - tyro protein tyrosine kinase binding protein, CD274 - cd274 molecule, HLX - h2.0-like homeobox, ARG2 - arginase 2, CTLA4 - cytotoxic t-lymphocyte-associated protein 4, VSIG4 - v-set and immunoglobulin domain containing 4, IDO1 - indoleamine 2,3-dioxygenase 1, ADORA2A - adenosine a2a receptor, ZBTB7B - zinc finger and btb domain containing 7b, ANXA1 - annexin a1, FOXP3 - forkhead box p3,…
GO:0071260	cellular response to mechanical stimulus	0.000503	0.0161	3.45	10	[MAP3K14 - mitogen-activated protein kinase kinase kinase 14, TNFRSF1A - tumor necrosis factor receptor superfamily, member 1a, MYD88 - myeloid differentiation primary response 88, RAC1 - ras-related c3 botulinum toxin substrate 1 (rho family, small gtp binding protein rac1), PTGS2 - prostaglandin-endoperoxide synthase 2 (prostaglandin g/h synthase and cyclooxygenase), TLR8 - toll-like receptor 8…
GO:0071360	cellular response to exogenous dsRNA	0.000513	0.0164	6.76	5	[IRF3 - interferon regulatory factor 3, RALB - v-ral simian leukemia viral oncogene homolog b, TMEM173 - transmembrane protein 173, FLOT1 - flotillin 1, DDX58 - dead (asp-glu-ala-asp) box polypeptide 58]
GO:0045086	positive regulation of interleukin-2 biosynthetic process	0.000513	0.0164	6.76	5	[CLEC7A - c-type lectin domain family 7, member a, CD86 - cd86 molecule, STAT5B - signal transducer and activator of transcription 5b, IL1A - interleukin 1, alpha, CD80 - cd80 molecule]
GO:0071407	cellular response to organic cyclic compound	0.000521	0.0166	1.98	27	[P2RY13 - purinergic receptor p2y, g-protein coupled, 13, PKD2 - polycystic kidney disease 2 (autosomal dominant), ICAM1 - intercellular adhesion molecule 1, RALB - v-ral simian leukemia viral oncogene homolog b, FLOT1 - flotillin 1, IL18 - interleukin 18 (interferon-gamma-inducing factor), IL15 - interleukin 15, STAT1 - signal transducer and activator of transcription 1, 91kda, KLF2 - kruppel-li…
GO:0071356	cellular response to tumor necrosis factor	0.000522	0.0166	3.01	12	[ICAM1 - intercellular adhesion molecule 1, GBA - glucosidase, beta, acid, VCAM1 - vascular cell adhesion molecule 1, IL8 - interleukin 8, NFKB1 - nuclear factor of kappa light polypeptide gene enhancer in b-cells 1, KLF2 - kruppel-like factor 2 (lung), ASAH1 - n-acylsphingosine amidohydrolase (acid ceramidase) 1, ARHGEF2 - rho/rac guanine nucleotide exchange factor (gef) 2, CYBA - cytochrome b-2…
GO:0051051	negative regulation of transport	0.00053	0.0168	1.9	30	[PKD2 - polycystic kidney disease 2 (autosomal dominant), ICAM1 - intercellular adhesion molecule 1, LRPAP1 - low density lipoprotein receptor-related protein associated protein 1, FN1 - fibronectin 1, SRGN - serglycin, TNFRSF4 - tumor necrosis factor receptor superfamily, member 4, VPS35 - vacuolar protein sorting 35 homolog (s. cerevisiae), KEL - kell blood group, metallo-endopeptidase, BST2 - …
GO:0015711	organic anion transport	0.000545	0.0173	2.04	25	[SLC37A2 - solute carrier family 37 (glucose-6-phosphate transporter), member 2, PSAP - prosaposin, ABCA1 - atp-binding cassette, sub-family a (abc1), member 1, ABCG2 - atp-binding cassette, sub-family g (white), member 2, SLC16A3 - solute carrier family 16 (monocarboxylate transporter), member 3, ACSL1 - acyl-coa synthetase long-chain family member 1, SLC11A1 - solute carrier family 11 (proton-c…
GO:0045765	regulation of angiogenesis	0.000552	0.0174	2.15	22	[CTSH - cathepsin h, STAT1 - signal transducer and activator of transcription 1, 91kda, KLF2 - kruppel-like factor 2 (lung), SPHK1 - sphingosine kinase 1, IL1A - interleukin 1, alpha, KLF4 - kruppel-like factor 4 (gut), GHSR - growth hormone secretagogue receptor, SEMA4A - sema domain, immunoglobulin domain (ig), transmembrane domain (tm) and short cytoplasmic domain, (semaphorin) 4a, NRP1 - neur…
GO:2000106	regulation of leukocyte apoptotic process	0.000568	0.0178	3.17	11	[GHSR - growth hormone secretagogue receptor, SLC46A2 - solute carrier family 46, member 2, ARG2 - arginase 2, P2RX7 - purinergic receptor p2x, ligand-gated ion channel, 7, IRF7 - interferon regulatory factor 7, IDO1 - indoleamine 2,3-dioxygenase 1, ANXA1 - annexin a1, ADAM17 - adam metallopeptidase domain 17, GIMAP8 - gtpase, imap family member 8, CD274 - cd274 molecule, HIF1A - hypoxia inducibl…
GO:0048661	positive regulation of smooth muscle cell proliferation	0.000568	0.0178	3.17	11	[IL18 - interleukin 18 (interferon-gamma-inducing factor), S1PR1 - sphingosine-1-phosphate receptor 1, HMOX1 - heme oxygenase (decycling) 1, PTGS2 - prostaglandin-endoperoxide synthase 2 (prostaglandin g/h synthase and cyclooxygenase), STAT1 - signal transducer and activator of transcription 1, 91kda, LDLRAP1 - low density lipoprotein receptor adaptor protein 1, HBEGF - heparin-binding egf-like g…
GO:0010952	positive regulation of peptidase activity	0.00057	0.0178	2.43	17	[TNFSF15 - tumor necrosis factor (ligand) superfamily, member 15, PSME1 - proteasome (prosome, macropain) activator subunit 1 (pa28 alpha), CTSH - cathepsin h, LGMN - legumain, FN1 - fibronectin 1, PSME2 - proteasome (prosome, macropain) activator subunit 2 (pa28 beta), CFLAR - casp8 and fadd-like apoptosis regulator, CLEC7A - c-type lectin domain family 7, member a, CLDN3 - claudin 3, S100A8 - s…
GO:0002685	regulation of leukocyte migration	0.00057	0.0178	2.43	17	[ICAM1 - intercellular adhesion molecule 1, CCR6 - chemokine (c-c motif) receptor 6, LGMN - legumain, CMKLR1 - chemokine-like receptor 1, MMP14 - matrix metallopeptidase 14 (membrane-inserted), ADAM17 - adam metallopeptidase domain 17, AIF1 - allograft inflammatory factor 1, CCR1 - chemokine (c-c motif) receptor 1, IL23A - interleukin 23, alpha subunit p19, ANXA1 - annexin a1, IL8 - interleukin 8…
GO:0022408	negative regulation of cell-cell adhesion	0.000567	0.0179	2.51	16	[CD274 - cd274 molecule, HLX - h2.0-like homeobox, KLF4 - kruppel-like factor 4 (gut), VSIG4 - v-set and immunoglobulin domain containing 4, ARG2 - arginase 2, CTLA4 - cytotoxic t-lymphocyte-associated protein 4, JAG1 - jagged 1, IDO1 - indoleamine 2,3-dioxygenase 1, ADORA2A - adenosine a2a receptor, ZBTB7B - zinc finger and btb domain containing 7b, ANXA1 - annexin a1, FOXP3 - forkhead box p3, C…
GO:0030669	clathrin-coated endocytic vesicle membrane	0.000761	0.0182	6.28	5	[AP2A1 - adaptor-related protein complex 2, alpha 1 subunit, LDLR - low density lipoprotein receptor, FCGR1A - fc fragment of igg, high affinity ia, receptor (cd64), AP2S1 - adaptor-related protein complex 2, sigma 1 subunit, HBEGF - heparin-binding egf-like growth factor]
GO:0070498	interleukin-1-mediated signaling pathway	0.000599	0.0186	2.82	13	[PSME1 - proteasome (prosome, macropain) activator subunit 1 (pa28 alpha), PSMA5 - proteasome (prosome, macropain) subunit, alpha type, 5, PSME2 - proteasome (prosome, macropain) activator subunit 2 (pa28 beta), MYD88 - myeloid differentiation primary response 88, NFKBIA - nuclear factor of kappa light polypeptide gene enhancer in b-cells inhibitor, alpha, PSMB9 - proteasome (prosome, macropain) …
GO:0031666	positive regulation of lipopolysaccharide-mediated signaling pathway	0.000603	0.0186	8.79	4	[SASH1 - sam and sh3 domain containing 1, CD180 - cd180 molecule, SCIMP - slp adaptor and csk interacting membrane protein, LY86 - lymphocyte antigen 86]
GO:0032725	positive regulation of granulocyte macrophage colony-stimulating factor production	0.000603	0.0187	8.79	4	[IL23A - interleukin 23, alpha subunit p19, IL18 - interleukin 18 (interferon-gamma-inducing factor), DDX58 - dead (asp-glu-ala-asp) box polypeptide 58, CD80 - cd80 molecule]
GO:0042088	T-helper 1 type immune response	0.000603	0.0187	8.79	4	[BCL3 - b-cell cll/lymphoma 3, IL18 - interleukin 18 (interferon-gamma-inducing factor), TLR4 - toll-like receptor 4, EBI3 - epstein-barr virus induced 3]
GO:0050690	regulation of defense response to virus by virus	0.000606	0.0187	4.56	7	[AP2A1 - adaptor-related protein complex 2, alpha 1 subunit, AP1S3 - adaptor-related protein complex 1, sigma 3 subunit, HCK - hemopoietic cell kinase, RAC1 - ras-related c3 botulinum toxin substrate 1 (rho family, small gtp binding protein rac1), AP2S1 - adaptor-related protein complex 2, sigma 1 subunit, EIF2AK2 - eukaryotic translation initiation factor 2-alpha kinase 2, B2M - beta-2-microglob…
GO:0043281	regulation of cysteine-type endopeptidase activity involved in apoptotic process	0.000616	0.019	2.34	18	[TNFSF15 - tumor necrosis factor (ligand) superfamily, member 15, CTSH - cathepsin h, MT3 - metallothionein 3, CFLAR - casp8 and fadd-like apoptosis regulator, CLEC7A - c-type lectin domain family 7, member a, GPX1 - glutathione peroxidase 1, S100A8 - s100 calcium binding protein a8, KLF4 - kruppel-like factor 4 (gut), NLRP12 - nlr family, pyrin domain containing 12, PLAUR - plasminogen activator…
GO:0045624	positive regulation of T-helper cell differentiation	0.000643	0.0197	5.27	6	[IL23A - interleukin 23, alpha subunit p19, IL18 - interleukin 18 (interferon-gamma-inducing factor), ANXA1 - annexin a1, CD86 - cd86 molecule, HLX - h2.0-like homeobox, CD80 - cd80 molecule]
GO:2000482	regulation of interleukin-8 secretion	0.000643	0.0198	5.27	6	[FFAR2 - free fatty acid receptor 2, CD14 - cd14 molecule, TLR2 - toll-like receptor 2, ANXA1 - annexin a1, TLR4 - toll-like receptor 4, PYCARD - pyd and card domain containing]
GO:0048660	regulation of smooth muscle cell proliferation	0.000651	0.0199	2.68	14	[IL18 - interleukin 18 (interferon-gamma-inducing factor), IL15 - interleukin 15, STAT1 - signal transducer and activator of transcription 1, 91kda, AIF1 - allograft inflammatory factor 1, KLF4 - kruppel-like factor 4 (gut), S1PR1 - sphingosine-1-phosphate receptor 1, SOD2 - superoxide dismutase 2, mitochondrial, HMOX1 - heme oxygenase (decycling) 1, PTGS2 - prostaglandin-endoperoxide synthase 2 …
GO:0010942	positive regulation of cell death	0.000677	0.0207	1.65	44	[TYROBP - tyro protein tyrosine kinase binding protein, UBD - ubiquitin d, CLEC7A - c-type lectin domain family 7, member a, RBCK1 - ranbp-type and c3hc4-type zinc finger containing 1, CD274 - cd274 molecule, FGD2 - fyve, rhogef and ph domain containing 2, CTLA4 - cytotoxic t-lymphocyte-associated protein 4, RASSF2 - ras association (ralgds/af-6) domain family member 2, IDO1 - indoleamine 2,3-dio…
GO:0046637	regulation of alpha-beta T cell differentiation	0.000693	0.0209	3.32	10	[IL23A - interleukin 23, alpha subunit p19, IL18 - interleukin 18 (interferon-gamma-inducing factor), ZBTB7B - zinc finger and btb domain containing 7b, ANXA1 - annexin a1, IL27 - interleukin 27, ZAP70 - zeta-chain (tcr) associated protein kinase 70kda, FOXP3 - forkhead box p3, CD86 - cd86 molecule, HLX - h2.0-like homeobox, CD80 - cd80 molecule]
GO:0055092	sterol homeostasis	0.00069	0.021	3.6	9	[VDR - vitamin d (1,25- dihydroxyvitamin d3) receptor, DGAT2 - diacylglycerol o-acyltransferase 2, LDLR - low density lipoprotein receptor, IL18 - interleukin 18 (interferon-gamma-inducing factor), SOAT1 - sterol o-acyltransferase 1, LDLRAP1 - low density lipoprotein receptor adaptor protein 1, EHD1 - eh-domain containing 1, ABCA1 - atp-binding cassette, sub-family a (abc1), member 1, ABCD1 - atp…
GO:0010951	negative regulation of endopeptidase activity	0.000692	0.021	2.47	16	[CST6 - cystatin e/m, TIMP1 - timp metallopeptidase inhibitor 1, CSTB - cystatin b (stefin b), MT3 - metallothionein 3, SERPING1 - serpin peptidase inhibitor, clade g (c1 inhibitor), member 1, CFLAR - casp8 and fadd-like apoptosis regulator, GPX1 - glutathione peroxidase 1, WFDC2 - wap four-disulfide core domain 2, KLF4 - kruppel-like factor 4 (gut), BST2 - bone marrow stromal cell antigen 2, PLA…
GO:0002443	leukocyte mediated immunity	0.000693	0.021	3.32	10	[SLC11A1 - solute carrier family 11 (proton-coupled divalent metal ion transporter), member 1, CTSH - cathepsin h, BCL3 - b-cell cll/lymphoma 3, IL18 - interleukin 18 (interferon-gamma-inducing factor), JAG1 - jagged 1, IRF7 - interferon regulatory factor 7, TLR8 - toll-like receptor 8, FOXP3 - forkhead box p3, ADAM17 - adam metallopeptidase domain 17, IL6 - interleukin 6 (interferon, beta 2)]
GO:0038123	toll-like receptor TLR1:TLR2 signaling pathway	0.000701	0.021	13.19	3	[CD14 - cd14 molecule, TLR2 - toll-like receptor 2, SCIMP - slp adaptor and csk interacting membrane protein]
GO:0097411	hypoxia-inducible factor-1alpha signaling pathway	0.000701	0.021	13.19	3	[PDK1 - pyruvate dehydrogenase kinase, isozyme 1, CYBB - cytochrome b-245, beta polypeptide, HIF1A - hypoxia inducible factor 1, alpha subunit (basic helix-loop-helix transcription factor)]
GO:0034154	toll-like receptor 7 signaling pathway	0.000701	0.0211	13.19	3	[SCIMP - slp adaptor and csk interacting membrane protein, UNC93B1 - unc-93 homolog b1 (c. elegans), PIK3AP1 - phosphoinositide-3-kinase adaptor protein 1]
GO:1904464	regulation of matrix metallopeptidase secretion	0.000701	0.0211	13.19	3	[TLR2 - toll-like receptor 2, TLR4 - toll-like receptor 4, IDH2 - isocitrate dehydrogenase 2 (nadp+), mitochondrial]
GO:0006689	ganglioside catabolic process	0.000701	0.0212	13.19	3	[NEU1 - sialidase 1 (lysosomal sialidase), HEXB - hexosaminidase b (beta polypeptide), GM2A - gm2 ganglioside activator]
GO:0044403	symbiont process	0.000713	0.0212	1.63	45	[AP1S3 - adaptor-related protein complex 1, sigma 3 subunit, AP2A1 - adaptor-related protein complex 2, alpha 1 subunit, DHX58 - dexh (asp-glu-x-his) box polypeptide 58, RPL22 - ribosomal protein l22, STAT2 - signal transducer and activator of transcription 2, 113kda, STAT1 - signal transducer and activator of transcription 1, 91kda, MORC3 - morc family cw-type zinc finger 3, RBCK1 - ranbp-type a…
GO:0016032	viral process	0.000713	0.0213	1.63	45	[AP1S3 - adaptor-related protein complex 1, sigma 3 subunit, AP2A1 - adaptor-related protein complex 2, alpha 1 subunit, DHX58 - dexh (asp-glu-x-his) box polypeptide 58, RPL22 - ribosomal protein l22, STAT2 - signal transducer and activator of transcription 2, 113kda, STAT1 - signal transducer and activator of transcription 1, 91kda, MORC3 - morc family cw-type zinc finger 3, RBCK1 - ranbp-type a…
GO:0002705	positive regulation of leukocyte mediated immunity	0.000727	0.0216	2.65	14	[RSAD2 - radical s-adenosyl methionine domain containing 2, LAMP1 - lysosomal-associated membrane protein 1, IL18 - interleukin 18 (interferon-gamma-inducing factor), P2RX7 - purinergic receptor p2x, ligand-gated ion channel, 7, FCGRT - fc fragment of igg, receptor, transporter, alpha, STAT5B - signal transducer and activator of transcription 5b, TICAM1 - toll-like receptor adaptor molecule 1, B2…
GO:0001525	angiogenesis	0.000729	0.0216	2.2	20	[IL18 - interleukin 18 (interferon-gamma-inducing factor), FN1 - fibronectin 1, AAMP - angio-associated, migratory cell protein, EGFL7 - egf-like-domain, multiple 7, GPX1 - glutathione peroxidase 1, MMP14 - matrix metallopeptidase 14 (membrane-inserted), SEMA4A - sema domain, immunoglobulin domain (ig), transmembrane domain (tm) and short cytoplasmic domain, (semaphorin) 4a, NRP1 - neuropilin 1, …
GO:0002822	regulation of adaptive immune response based on somatic recombination of immune receptors built from immunoglobulin superfamily domains	0.000754	0.0223	2.54	15	[RSAD2 - radical s-adenosyl methionine domain containing 2, IL18 - interleukin 18 (interferon-gamma-inducing factor), P2RX7 - purinergic receptor p2x, ligand-gated ion channel, 7, FCGRT - fc fragment of igg, receptor, transporter, alpha, CD274 - cd274 molecule, HLX - h2.0-like homeobox, B2M - beta-2-microglobulin, IL23A - interleukin 23, alpha subunit p19, SLC11A1 - solute carrier family 11 (prot…
GO:0002830	positive regulation of type 2 immune response	0.000761	0.0225	6.28	5	[RSAD2 - radical s-adenosyl methionine domain containing 2, IL18 - interleukin 18 (interferon-gamma-inducing factor), IDO1 - indoleamine 2,3-dioxygenase 1, CD86 - cd86 molecule, IL6 - interleukin 6 (interferon, beta 2)]
GO:0048771	tissue remodeling	0.000764	0.0225	3.91	8	[IL23A - interleukin 23, alpha subunit p19, TIMP1 - timp metallopeptidase inhibitor 1, JAG1 - jagged 1, RASSF2 - ras association (ralgds/af-6) domain family member 2, ANXA1 - annexin a1, MMP14 - matrix metallopeptidase 14 (membrane-inserted), IL1A - interleukin 1, alpha, HIF1A - hypoxia inducible factor 1, alpha subunit (basic helix-loop-helix transcription factor)]
GO:0046631	alpha-beta T cell activation	0.000764	0.0225	3.91	8	[SEMA4A - sema domain, immunoglobulin domain (ig), transmembrane domain (tm) and short cytoplasmic domain, (semaphorin) 4a, RSAD2 - radical s-adenosyl methionine domain containing 2, BCL3 - b-cell cll/lymphoma 3, IL15 - interleukin 15, RPL22 - ribosomal protein l22, ZBTB7B - zinc finger and btb domain containing 7b, ANXA1 - annexin a1, TNFSF8 - tumor necrosis factor (ligand) superfamily, member 8]
GO:0010830	regulation of myotube differentiation	0.000769	0.0226	4.4	7	[FLOT1 - flotillin 1, CD53 - cd53 molecule, CFLAR - casp8 and fadd-like apoptosis regulator, MMP14 - matrix metallopeptidase 14 (membrane-inserted), TRIM72 - tripartite motif containing 72, EHD1 - eh-domain containing 1, BHLHA15 - basic helix-loop-helix family, member a15]
GO:0009056	catabolic process	0.000783	0.0229	1.35	101	[LGMN - legumain, DTX3L - deltex 3-like (drosophila), PSAP - prosaposin, RBCK1 - ranbp-type and c3hc4-type zinc finger containing 1, TMEM173 - transmembrane protein 173, LDLR - low density lipoprotein receptor, IDO1 - indoleamine 2,3-dioxygenase 1, PML - promyelocytic leukemia, TOLLIP - toll interacting protein, AGRN - agrin, CECR1 - cat eye syndrome chromosome region, candidate 1, RPL35 - riboso…
GO:2000145	regulation of cell motility	0.000806	0.0235	1.57	51	[TIMP1 - timp metallopeptidase inhibitor 1, LGMN - legumain, FN1 - fibronectin 1, AAMP - angio-associated, migratory cell protein, CD274 - cd274 molecule, IL23A - interleukin 23, alpha subunit p19, SEMA4A - sema domain, immunoglobulin domain (ig), transmembrane domain (tm) and short cytoplasmic domain, (semaphorin) 4a, NRP1 - neuropilin 1, BST2 - bone marrow stromal cell antigen 2, JAG1 - jagged …
GO:0019220	regulation of phosphate metabolic process	0.000839	0.0245	1.38	89	[IL18 - interleukin 18 (interferon-gamma-inducing factor), IL15 - interleukin 15, FN1 - fibronectin 1, PSAP - prosaposin, TMEM106A - transmembrane protein 106a, IL23A - interleukin 23, alpha subunit p19, ACSL1 - acyl-coa synthetase long-chain family member 1, SLC11A1 - solute carrier family 11 (proton-coupled divalent metal ion transporter), member 1, NRP1 - neuropilin 1, RCAN3 - rcan family memb…
GO:0098586	cellular response to virus	0.000857	0.0249	5.02	6	[ADAR - adenosine deaminase, rna-specific, IRF3 - interferon regulatory factor 3, TMEM173 - transmembrane protein 173, IRF7 - interferon regulatory factor 7, DDX58 - dead (asp-glu-ala-asp) box polypeptide 58, IFI6 - interferon, alpha-inducible protein 6]
GO:0051174	regulation of phosphorus metabolic process	0.000863	0.025	1.38	89	[IL18 - interleukin 18 (interferon-gamma-inducing factor), IL15 - interleukin 15, FN1 - fibronectin 1, PSAP - prosaposin, TMEM106A - transmembrane protein 106a, IL23A - interleukin 23, alpha subunit p19, ACSL1 - acyl-coa synthetase long-chain family member 1, SLC11A1 - solute carrier family 11 (proton-coupled divalent metal ion transporter), member 1, NRP1 - neuropilin 1, RCAN3 - rcan family memb…
GO:0051336	regulation of hydrolase activity	0.000901	0.0261	1.47	66	[CST6 - cystatin e/m, TIMP1 - timp metallopeptidase inhibitor 1, CSTB - cystatin b (stefin b), LGMN - legumain, FN1 - fibronectin 1, OASL - 2'-5'-oligoadenylate synthetase-like, PSAP - prosaposin, TBC1D2B - tbc1 domain family, member 2b, NRP1 - neuropilin 1, RCAN3 - rcan family member 3, BST2 - bone marrow stromal cell antigen 2, PML - promyelocytic leukemia, AGRN - agrin, DNAJC24 - dnaj (hsp40) …
GO:0002478	antigen processing and presentation of exogenous peptide antigen	0.000904	0.0261	2.34	17	[AP1S3 - adaptor-related protein complex 1, sigma 3 subunit, AP2A1 - adaptor-related protein complex 2, alpha 1 subunit, PSME1 - proteasome (prosome, macropain) activator subunit 1 (pa28 alpha), LGMN - legumain, PSMA5 - proteasome (prosome, macropain) subunit, alpha type, 5, PSME2 - proteasome (prosome, macropain) activator subunit 2 (pa28 beta), AP2S1 - adaptor-related protein complex 2, sigma 1…
GO:0001961	positive regulation of cytokine-mediated signaling pathway	0.000927	0.0267	3.8	8	[IRF3 - interferon regulatory factor 3, IRF7 - interferon regulatory factor 7, PARP14 - poly (adp-ribose) polymerase family, member 14, PARP9 - poly (adp-ribose) polymerase family, member 9, ZBP1 - z-dna binding protein 1, ADAM17 - adam metallopeptidase domain 17, CASP1 - caspase 1, apoptosis-related cysteine peptidase, HIF1A - hypoxia inducible factor 1, alpha subunit (basic helix-loop-helix tra…
GO:0045824	negative regulation of innate immune response	0.000927	0.0267	3.8	8	[ADAR - adenosine deaminase, rna-specific, VSIG4 - v-set and immunoglobulin domain containing 4, DHX58 - dexh (asp-glu-x-his) box polypeptide 58, PARP14 - poly (adp-ribose) polymerase family, member 14, TRAFD1 - traf-type zinc finger domain containing 1, SERPING1 - serpin peptidase inhibitor, clade g (c1 inhibitor), member 1, GRN - granulin, NMI - n-myc (and stat) interactor]
GO:0030100	regulation of endocytosis	0.00093	0.0267	2.11	21	[AP2A1 - adaptor-related protein complex 2, alpha 1 subunit, LRPAP1 - low density lipoprotein receptor-related protein associated protein 1, FLOT1 - flotillin 1, HCK - hemopoietic cell kinase, IL15 - interleukin 15, AP2S1 - adaptor-related protein complex 2, sigma 1 subunit, CLEC7A - c-type lectin domain family 7, member a, SPHK1 - sphingosine kinase 1, RAB20 - rab20, member ras oncogene family, …
GO:0035690	cellular response to drug	0.000932	0.0267	1.96	25	[ICAM1 - intercellular adhesion molecule 1, KLF2 - kruppel-like factor 2 (lung), B2M - beta-2-microglobulin, CD69 - cd69 molecule, SPI1 - spleen focus forming virus (sffv) proviral integration oncogene, PTGS2 - prostaglandin-endoperoxide synthase 2 (prostaglandin g/h synthase and cyclooxygenase), CYP1B1 - cytochrome p450, family 1, subfamily b, polypeptide 1, FDX1 - ferredoxin 1, P2RX7 - purinerg…
GO:1901699	cellular response to nitrogen compound	0.000941	0.0269	1.79	32	[PKD2 - polycystic kidney disease 2 (autosomal dominant), RALB - v-ral simian leukemia viral oncogene homolog b, ICAM1 - intercellular adhesion molecule 1, FLOT1 - flotillin 1, LGMN - legumain, STAT1 - signal transducer and activator of transcription 1, 91kda, KLF2 - kruppel-like factor 2 (lung), TMEM173 - transmembrane protein 173, TLR4 - toll-like receptor 4, PTGS2 - prostaglandin-endoperoxide …
GO:1901575	organic substance catabolic process	0.000964	0.0275	1.37	89	[AP2A1 - adaptor-related protein complex 2, alpha 1 subunit, NAPEPLD - n-acyl phosphatidylethanolamine phospholipase d, LGMN - legumain, CAPN3 - calpain 3, (p94), RPL22 - ribosomal protein l22, DTX3L - deltex 3-like (drosophila), NCEH1 - neutral cholesterol ester hydrolase 1, PSAP - prosaposin, GNS - glucosamine (n-acetyl)-6-sulfatase, PGD - phosphogluconate dehydrogenase, RBCK1 - ranbp-type and …
GO:0046632	alpha-beta T cell differentiation	0.000965	0.0275	4.24	7	[SEMA4A - sema domain, immunoglobulin domain (ig), transmembrane domain (tm) and short cytoplasmic domain, (semaphorin) 4a, RSAD2 - radical s-adenosyl methionine domain containing 2, BCL3 - b-cell cll/lymphoma 3, RPL22 - ribosomal protein l22, ZBTB7B - zinc finger and btb domain containing 7b, ANXA1 - annexin a1, TNFSF8 - tumor necrosis factor (ligand) superfamily, member 8]
GO:0045621	positive regulation of lymphocyte differentiation	0.00099	0.0282	2.81	12	[IL23A - interleukin 23, alpha subunit p19, IL18 - interleukin 18 (interferon-gamma-inducing factor), IL15 - interleukin 15, ZBTB7B - zinc finger and btb domain containing 7b, ANXA1 - annexin a1, ZAP70 - zeta-chain (tcr) associated protein kinase 70kda, FOXP3 - forkhead box p3, MMP14 - matrix metallopeptidase 14 (membrane-inserted), STAT5B - signal transducer and activator of transcription 5b, CD…
GO:0038187	pattern recognition receptor activity	0.000116	0.0285	8.79	5	[CD14 - cd14 molecule, TLR2 - toll-like receptor 2, TLR8 - toll-like receptor 8, TLR4 - toll-like receptor 4, CLEC7A - c-type lectin domain family 7, member a]
GO:0015037	peptide disulfide oxidoreductase activity	0.000116	0.0304	8.79	5	[PDIA2 - protein disulfide isomerase family a, member 2, P4HB - prolyl 4-hydroxylase, beta polypeptide, PDIA4 - protein disulfide isomerase family a, member 4, GSTO1 - glutathione s-transferase omega 1, PDIA5 - protein disulfide isomerase family a, member 5]
GO:0008329	signaling pattern recognition receptor activity	0.000116	0.0326	8.79	5	[CD14 - cd14 molecule, TLR2 - toll-like receptor 2, TLR4 - toll-like receptor 4, TLR8 - toll-like receptor 8, CLEC7A - c-type lectin domain family 7, member a]
GO:0005138	interleukin-6 receptor binding	0.000142	0.0328	11.72	4	[ADAM17 - adam metallopeptidase domain 17, IL6 - interleukin 6 (interferon, beta 2), PYCARD - pyd and card domain containing, IL6R - interleukin 6 receptor]
GO:0035325	Toll-like receptor binding	0.000203	0.0443	7.99	5	[MYD88 - myeloid differentiation primary response 88, TLR2 - toll-like receptor 2, UNC93B1 - unc-93 homolog b1 (c. elegans), TOLLIP - toll interacting protein, S100A8 - s100 calcium binding protein a8]
GO:0098772	molecular function regulator	0.000243	0.0504	1.46	81	[CST6 - cystatin e/m, TIMP1 - timp metallopeptidase inhibitor 1, IL18 - interleukin 18 (interferon-gamma-inducing factor), CSTB - cystatin b (stefin b), IL15 - interleukin 15, FN1 - fibronectin 1, CAPN3 - calpain 3, (p94), DTX3L - deltex 3-like (drosophila), PSAP - prosaposin, EBI3 - epstein-barr virus induced 3, TBC1D2B - tbc1 domain family, member 2b, IL23A - interleukin 23, alpha subunit p19, …
GO:0046906	tetrapyrrole binding	0.000256	0.0505	3.25	12	[HEBP1 - heme binding protein 1, IDO1 - indoleamine 2,3-dioxygenase 1, SDHD - succinate dehydrogenase complex, subunit d, integral membrane protein, HMOX1 - heme oxygenase (decycling) 1, PTGS2 - prostaglandin-endoperoxide synthase 2 (prostaglandin g/h synthase and cyclooxygenase), FLVCR2 - feline leukemia virus subgroup c cellular receptor family, member 2, BACH1 - btb and cnc homology 1, basic l…
GO:0005539	glycosaminoglycan binding	0.000315	0.059	2.75	15	[LRPAP1 - low density lipoprotein receptor-related protein associated protein 1, TENM1 - teneurin transmembrane protein 1, FN1 - fibronectin 1, RPL22 - ribosomal protein l22, AAMP - angio-associated, migratory cell protein, GNS - glucosamine (n-acetyl)-6-sulfatase, NRP1 - neuropilin 1, TNFAIP6 - tumor necrosis factor, alpha-induced protein 6, TLR2 - toll-like receptor 2, HMMR - hyaluronan-mediate…
GO:0020037	heme binding	0.000361	0.0646	3.33	11	[HEBP1 - heme binding protein 1, IDO1 - indoleamine 2,3-dioxygenase 1, SDHD - succinate dehydrogenase complex, subunit d, integral membrane protein, HMOX1 - heme oxygenase (decycling) 1, PTGS2 - prostaglandin-endoperoxide synthase 2 (prostaglandin g/h synthase and cyclooxygenase), FLVCR2 - feline leukemia virus subgroup c cellular receptor family, member 2, BACH1 - btb and cnc homology 1, basic l…
GO:0104005	hijacked molecular function	0.000397	0.0652	3.86	9	[TNFRSF4 - tumor necrosis factor receptor superfamily, member 4, ICAM1 - intercellular adhesion molecule 1, LAMP1 - lysosomal-associated membrane protein 1, LDLR - low density lipoprotein receptor, SCARB2 - scavenger receptor class b, member 2, GPR15 - g protein-coupled receptor 15, CD86 - cd86 molecule, CLEC5A - c-type lectin domain family 5, member a, CD80 - cd80 molecule]
GO:0001618	virus receptor activity	0.000397	0.068	3.86	9	[TNFRSF4 - tumor necrosis factor receptor superfamily, member 4, ICAM1 - intercellular adhesion molecule 1, LAMP1 - lysosomal-associated membrane protein 1, LDLR - low density lipoprotein receptor, SCARB2 - scavenger receptor class b, member 2, GPR15 - g protein-coupled receptor 15, CD86 - cd86 molecule, CLEC5A - c-type lectin domain family 5, member a, CD80 - cd80 molecule]
GO:0019955	cytokine binding	0.000467	0.0736	2.89	13	[CCR4 - chemokine (c-c motif) receptor 4, CSF1R - colony stimulating factor 1 receptor, CCR6 - chemokine (c-c motif) receptor 6, EBI3 - epstein-barr virus induced 3, CSF3R - colony stimulating factor 3 receptor (granulocyte), CCR1 - chemokine (c-c motif) receptor 1, NRP1 - neuropilin 1, IFNAR1 - interferon (alpha, beta and omega) receptor 1, IL10RA - interleukin 10 receptor, alpha, TNFRSF1A - tum…
GO:0070851	growth factor receptor binding	0.000522	0.0762	3.01	12	[GRB2 - growth factor receptor-bound protein 2, CSF3 - colony stimulating factor 3 (granulocyte), TOLLIP - toll interacting protein, TGFA - transforming growth factor, alpha, IL1RAP - interleukin 1 receptor accessory protein, ADAM17 - adam metallopeptidase domain 17, HBEGF - heparin-binding egf-like growth factor, IL6 - interleukin 6 (interferon, beta 2), PLSCR1 - phospholipid scramblase 1, IL1A …
GO:0016860	intramolecular oxidoreductase activity	0.000507	0.0767	4.14	8	[PDIA2 - protein disulfide isomerase family a, member 2, CRELD2 - cysteine-rich with egf-like domains 2, P4HB - prolyl 4-hydroxylase, beta polypeptide, PDIA4 - protein disulfide isomerase family a, member 4, EHHADH - enoyl-coa, hydratase/3-hydroxyacyl coa dehydrogenase, PTGES - prostaglandin e synthase, TBXAS1 - thromboxane a synthase 1 (platelet), PDIA5 - protein disulfide isomerase family a, me…
GO:0008061	chitin binding	0.000701	0.0986	13.19	3	[CHIT1 - chitinase 1 (chitotriosidase), CHI3L2 - chitinase 3-like 2, CHI3L1 - chitinase 3-like 1 (cartilage glycoprotein-39)]

## Sheet: TableS7B
Table S7B. GO Terms enriched among upregulated genes (post- vs. pre-weaning)
GO Term	Description	P-value	FDR q-value	Enrichment	No. Genes	Genes
GO:0003676	nucleic acid binding	1.66e-10	6.55e-07	1.52	173	[MTPAP - mitochondrial poly(a) polymerase, ZNF189 - zinc finger protein 189, SRSF11 - serine/arginine-rich splicing factor 11, EXOSC9 - exosome component 9, ZNF202 - zinc finger protein 202, TTC14 - tetratricopeptide repeat domain 14, LUC7L3 - luc7-like 3 (s. cerevisiae), RBM39 - rna binding motif protein 39, SPRTN - sprt-like n-terminal domain, DDIT3 - dna-damage-inducible transcript 3, SUGP2 - …
GO:0044451	nucleoplasm part	2.2e-09	4e-06	1.98	78	[SRSF11 - serine/arginine-rich splicing factor 11, ZNF202 - zinc finger protein 202, LUC7L3 - luc7-like 3 (s. cerevisiae), ZMYM2 - zinc finger, mym-type 2, RBM39 - rna binding motif protein 39, PRPF3 - pre-mrna processing factor 3, ZBTB1 - zinc finger and btb domain containing 1, SPRTN - sprt-like n-terminal domain, SUGP2 - surp and g patch domain containing 2, BRCA1 - breast cancer 1, early onse…
GO:0005654	nucleoplasm	1.18e-07	0.000107	1.4	173	[DST - dystonin, SRSF11 - serine/arginine-rich splicing factor 11, CDC20 - cell division cycle 20, EXOSC9 - exosome component 9, LUC7L3 - luc7-like 3 (s. cerevisiae), RBM39 - rna binding motif protein 39, SPRTN - sprt-like n-terminal domain, DDIT3 - dna-damage-inducible transcript 3, SUGP2 - surp and g patch domain containing 2, BRCA1 - breast cancer 1, early onset, GORAB - golgin, rab6-interacti…
GO:0005634	nucleus	2.27e-07	0.000137	1.35	196	[DST - dystonin, EXOSC9 - exosome component 9, BRCA1 - breast cancer 1, early onset, BRAF - v-raf murine sarcoma viral oncogene homolog b, UHRF1 - ubiquitin-like with phd and ring finger domains 1, RFX3 - regulatory factor x, 3 (influences hla class ii expression), SNAPC5 - small nuclear rna activating complex, polypeptide 5, 19kda, ZNF784 - zinc finger protein 784, KLF9 - kruppel-like factor 9, …
GO:0044428	nuclear part	4.06e-07	0.000184	1.32	206	[DST - dystonin, EXOSC9 - exosome component 9, RBM39 - rna binding motif protein 39, BRCA1 - breast cancer 1, early onset, SUGP2 - surp and g patch domain containing 2, PNN - pinin, desmosome associated protein, GORAB - golgin, rab6-interacting, UHRF1 - ubiquitin-like with phd and ring finger domains 1, RFX3 - regulatory factor x, 3 (influences hla class ii expression), SNAPC5 - small nuclear rna…
GO:0016604	nuclear body	3.46e-06	0.00126	1.92	52	[SRSF11 - serine/arginine-rich splicing factor 11, ZNF202 - zinc finger protein 202, LUC7L3 - luc7-like 3 (s. cerevisiae), RBM39 - rna binding motif protein 39, ZMYM2 - zinc finger, mym-type 2, PRPF3 - pre-mrna processing factor 3, ZBTB1 - zinc finger and btb domain containing 1, SPRTN - sprt-like n-terminal domain, SUGP2 - surp and g patch domain containing 2, BRCA1 - breast cancer 1, early onse…
GO:0003677	DNA binding	9.01e-07	0.00177	1.58	101	[ZNF189 - zinc finger protein 189, ZNF202 - zinc finger protein 202, LUC7L3 - luc7-like 3 (s. cerevisiae), SPRTN - sprt-like n-terminal domain, DDIT3 - dna-damage-inducible transcript 3, BRCA1 - breast cancer 1, early onset, PNN - pinin, desmosome associated protein, TCF12 - transcription factor 12, UHRF1 - ubiquitin-like with phd and ring finger domains 1, RFX3 - regulatory factor x, 3 (influenc…
GO:0006397	mRNA processing	3.82e-07	0.00526	2.45	37	[MTPAP - mitochondrial poly(a) polymerase, PAPOLG - poly(a) polymerase gamma, SRSF11 - serine/arginine-rich splicing factor 11, DBR1 - debranching rna lariats 1, RBM39 - rna binding motif protein 39, PRPF3 - pre-mrna processing factor 3, SUGP2 - surp and g patch domain containing 2, PNN - pinin, desmosome associated protein, SRSF10 - serine/arginine-rich splicing factor 10, SNRNP27 - small nuclea…
GO:0006396	RNA processing	2.18e-06	0.015	1.91	55	[MTPAP - mitochondrial poly(a) polymerase, SRSF11 - serine/arginine-rich splicing factor 11, EXOSC9 - exosome component 9, LUC7L3 - luc7-like 3 (s. cerevisiae), DBR1 - debranching rna lariats 1, RBM39 - rna binding motif protein 39, PRPF3 - pre-mrna processing factor 3, POP4 - processing of precursor 4, ribonuclease p/mrp subunit (s. cerevisiae), AARS - alanyl-trna synthetase, SUGP2 - surp and g …
GO:0008380	RNA splicing	3.29e-06	0.0151	2.41	32	[SRSF11 - serine/arginine-rich splicing factor 11, DBR1 - debranching rna lariats 1, LUC7L3 - luc7-like 3 (s. cerevisiae), RBM39 - rna binding motif protein 39, PRPF3 - pre-mrna processing factor 3, SUGP2 - surp and g patch domain containing 2, PNN - pinin, desmosome associated protein, SRSF10 - serine/arginine-rich splicing factor 10, SNRNP27 - small nuclear ribonucleoprotein 27kda (u4/u6.u5), R…
GO:0061733	peptide-lysine-N-acetyltransferase activity	1.3e-05	0.0171	4.78	11	[TAF9 - taf9 rna polymerase ii, tata box binding protein (tbp)-associated factor, 32kda, KANSL3 - kat8 regulatory nsl complex subunit 3, NAA40 - n(alpha)-acetyltransferase 40, natd catalytic subunit, homolog (s. cerevisiae), TAF9B - taf9b rna polymerase ii, tata box binding protein (tbp)-associated factor, 31kda, KAT6B - k(lysine) acetyltransferase 6b, OGT - o-linked n-acetylglucosamine (glcnac) …
GO:0016071	mRNA metabolic process	6.21e-06	0.0214	2	45	[MTPAP - mitochondrial poly(a) polymerase, PAPOLG - poly(a) polymerase gamma, SRSF11 - serine/arginine-rich splicing factor 11, EXOSC9 - exosome component 9, DBR1 - debranching rna lariats 1, RBM39 - rna binding motif protein 39, ZBTB1 - zinc finger and btb domain containing 1, PRPF3 - pre-mrna processing factor 3, DDIT3 - dna-damage-inducible transcript 3, SUGP2 - surp and g patch domain contain…
GO:1901363	heterocyclic compound binding	2.22e-05	0.0219	1.25	210	[EXOSC9 - exosome component 9, RBM39 - rna binding motif protein 39, SUGP2 - surp and g patch domain containing 2, AARS - alanyl-trna synthetase, BRCA1 - breast cancer 1, early onset, PNN - pinin, desmosome associated protein, BRAF - v-raf murine sarcoma viral oncogene homolog b, UHRF1 - ubiquitin-like with phd and ring finger domains 1, RFX3 - regulatory factor x, 3 (influences hla class ii expr…
GO:0051253	negative regulation of RNA metabolic process	1.28e-05	0.0221	1.71	64	[ZNF189 - zinc finger protein 189, ZNF202 - zinc finger protein 202, PKIA - protein kinase (camp-dependent, catalytic) inhibitor alpha, ZBTB1 - zinc finger and btb domain containing 1, DDIT3 - dna-damage-inducible transcript 3, NRDE2 - nrde-2, necessary for rna interference, domain containing, BRCA1 - breast cancer 1, early onset, UHRF1 - ubiquitin-like with phd and ring finger domains 1, XPO1 - …
GO:2001141	regulation of RNA biosynthetic process	2.12e-05	0.0225	1.39	128	[ZNF189 - zinc finger protein 189, EXOSC9 - exosome component 9, ZNF202 - zinc finger protein 202, ZMYM2 - zinc finger, mym-type 2, DDIT3 - dna-damage-inducible transcript 3, BRCA1 - breast cancer 1, early onset, TCF12 - transcription factor 12, UHRF1 - ubiquitin-like with phd and ring finger domains 1, RFX3 - regulatory factor x, 3 (influences hla class ii expression), RBMX - rna binding motif p…
GO:0000398	mRNA splicing, via spliceosome	1.99e-05	0.0229	2.57	24	[SFPQ - splicing factor proline/glutamine-rich, LSM6 - lsm6 homolog, u6 small nuclear rna associated (s. cerevisiae), SRSF11 - serine/arginine-rich splicing factor 11, DBR1 - debranching rna lariats 1, PRPF3 - pre-mrna processing factor 3, SRSF4 - serine/arginine-rich splicing factor 4, PNN - pinin, desmosome associated protein, SRSF7 - serine/arginine-rich splicing factor 7, HNRNPH1 - heterogene…
GO:0051252	regulation of RNA metabolic process	1.24e-05	0.0243	1.38	138	[ZNF189 - zinc finger protein 189, EXOSC9 - exosome component 9, ZNF202 - zinc finger protein 202, ZMYM2 - zinc finger, mym-type 2, DDIT3 - dna-damage-inducible transcript 3, BRCA1 - breast cancer 1, early onset, TCF12 - transcription factor 12, UHRF1 - ubiquitin-like with phd and ring finger domains 1, RFX3 - regulatory factor x, 3 (influences hla class ii expression), RBMX - rna binding motif p…
GO:0000377	RNA splicing, via transesterification reactions with bulged adenosine as nucleophile	1.99e-05	0.025	2.57	24	[SFPQ - splicing factor proline/glutamine-rich, LSM6 - lsm6 homolog, u6 small nuclear rna associated (s. cerevisiae), SRSF11 - serine/arginine-rich splicing factor 11, DBR1 - debranching rna lariats 1, PRPF3 - pre-mrna processing factor 3, SRSF4 - serine/arginine-rich splicing factor 4, PNN - pinin, desmosome associated protein, SRSF7 - serine/arginine-rich splicing factor 7, HNRNPH1 - heterogene…
GO:0045934	negative regulation of nucleobase-containing compound metabolic process	1.65e-05	0.0253	1.65	69	[ZNF189 - zinc finger protein 189, ZNF202 - zinc finger protein 202, PKIA - protein kinase (camp-dependent, catalytic) inhibitor alpha, ZBTB1 - zinc finger and btb domain containing 1, DDIT3 - dna-damage-inducible transcript 3, NRDE2 - nrde-2, necessary for rna interference, domain containing, BRCA1 - breast cancer 1, early onset, UHRF1 - ubiquitin-like with phd and ring finger domains 1, XPO1 - …
GO:0004402	histone acetyltransferase activity	5.36e-05	0.0264	4.52	10	[TAF9 - taf9 rna polymerase ii, tata box binding protein (tbp)-associated factor, 32kda, KANSL3 - kat8 regulatory nsl complex subunit 3, NAA40 - n(alpha)-acetyltransferase 40, natd catalytic subunit, homolog (s. cerevisiae), TAF9B - taf9b rna polymerase ii, tata box binding protein (tbp)-associated factor, 31kda, KAT6B - k(lysine) acetyltransferase 6b, OGT - o-linked n-acetylglucosamine (glcnac) …
GO:1903506	regulation of nucleic acid-templated transcription	1.93e-05	0.0265	1.39	128	[ZNF189 - zinc finger protein 189, EXOSC9 - exosome component 9, ZNF202 - zinc finger protein 202, ZMYM2 - zinc finger, mym-type 2, DDIT3 - dna-damage-inducible transcript 3, BRCA1 - breast cancer 1, early onset, TCF12 - transcription factor 12, UHRF1 - ubiquitin-like with phd and ring finger domains 1, RFX3 - regulatory factor x, 3 (influences hla class ii expression), RBMX - rna binding motif p…
GO:0000375	RNA splicing, via transesterification reactions	2.74e-05	0.027	2.52	24	[SFPQ - splicing factor proline/glutamine-rich, LSM6 - lsm6 homolog, u6 small nuclear rna associated (s. cerevisiae), SRSF11 - serine/arginine-rich splicing factor 11, DBR1 - debranching rna lariats 1, PRPF3 - pre-mrna processing factor 3, SRSF4 - serine/arginine-rich splicing factor 4, PNN - pinin, desmosome associated protein, SRSF7 - serine/arginine-rich splicing factor 7, HNRNPH1 - heterogene…
GO:0090304	nucleic acid metabolic process	1.18e-05	0.0272	1.46	110	[MTPAP - mitochondrial poly(a) polymerase, EXOSC9 - exosome component 9, SRSF11 - serine/arginine-rich splicing factor 11, ZNF202 - zinc finger protein 202, LUC7L3 - luc7-like 3 (s. cerevisiae), RBM39 - rna binding motif protein 39, DDIT3 - dna-damage-inducible transcript 3, SPRTN - sprt-like n-terminal domain, SUGP2 - surp and g patch domain containing 2, AARS - alanyl-trna synthetase, BRCA1 - b…
GO:0097159	organic cyclic compound binding	5.09e-05	0.0286	1.23	210	[EXOSC9 - exosome component 9, RBM39 - rna binding motif protein 39, SUGP2 - surp and g patch domain containing 2, AARS - alanyl-trna synthetase, BRCA1 - breast cancer 1, early onset, PNN - pinin, desmosome associated protein, BRAF - v-raf murine sarcoma viral oncogene homolog b, UHRF1 - ubiquitin-like with phd and ring finger domains 1, RFX3 - regulatory factor x, 3 (influences hla class ii expr…
GO:0034212	peptide N-acetyltransferase activity	4.68e-05	0.0307	4.2	11	[TAF9 - taf9 rna polymerase ii, tata box binding protein (tbp)-associated factor, 32kda, KANSL3 - kat8 regulatory nsl complex subunit 3, NAA40 - n(alpha)-acetyltransferase 40, natd catalytic subunit, homolog (s. cerevisiae), TAF9B - taf9b rna polymerase ii, tata box binding protein (tbp)-associated factor, 31kda, KAT6B - k(lysine) acetyltransferase 6b, OGT - o-linked n-acetylglucosamine (glcnac) …
GO:0006355	regulation of transcription, DNA-templated	1.13e-05	0.031	1.41	127	[ZNF189 - zinc finger protein 189, EXOSC9 - exosome component 9, ZNF202 - zinc finger protein 202, ZMYM2 - zinc finger, mym-type 2, DDIT3 - dna-damage-inducible transcript 3, BRCA1 - breast cancer 1, early onset, TCF12 - transcription factor 12, UHRF1 - ubiquitin-like with phd and ring finger domains 1, RFX3 - regulatory factor x, 3 (influences hla class ii expression), RBMX - rna binding motif p…
GO:0016070	RNA metabolic process	3.84e-05	0.0353	1.53	83	[MTPAP - mitochondrial poly(a) polymerase, SRSF11 - serine/arginine-rich splicing factor 11, EXOSC9 - exosome component 9, ZNF202 - zinc finger protein 202, LUC7L3 - luc7-like 3 (s. cerevisiae), DBR1 - debranching rna lariats 1, RBM39 - rna binding motif protein 39, PRPF3 - pre-mrna processing factor 3, ZBTB1 - zinc finger and btb domain containing 1, POP4 - processing of precursor 4, ribonucleas…
GO:0005681	spliceosomal complex	0.000117	0.0354	2.69	18	[LSM6 - lsm6 homolog, u6 small nuclear rna associated (s. cerevisiae), LUC7L3 - luc7-like 3 (s. cerevisiae), PRPF3 - pre-mrna processing factor 3, PRKRIP1 - prkr interacting protein 1 (il11 inducible), PNN - pinin, desmosome associated protein, HNRNPH1 - heterogeneous nuclear ribonucleoprotein h1 (h), HNRNPH3 - heterogeneous nuclear ribonucleoprotein h3 (2h9), TRA2B - transformer 2 beta homolog (…
GO:0003723	RNA binding	4.6e-05	0.0362	1.51	85	[MTPAP - mitochondrial poly(a) polymerase, SRSF11 - serine/arginine-rich splicing factor 11, EXOSC9 - exosome component 9, LUC7L3 - luc7-like 3 (s. cerevisiae), DBR1 - debranching rna lariats 1, RBM39 - rna binding motif protein 39, PRPF3 - pre-mrna processing factor 3, POP4 - processing of precursor 4, ribonuclease p/mrp subunit (s. cerevisiae), SUGP2 - surp and g patch domain containing 2, BRCA…
GO:2000112	regulation of cellular macromolecule biosynthetic process	4.77e-05	0.041	1.34	140	[ZNF189 - zinc finger protein 189, EXOSC9 - exosome component 9, ZNF202 - zinc finger protein 202, ZMYM2 - zinc finger, mym-type 2, DDIT3 - dna-damage-inducible transcript 3, AARS - alanyl-trna synthetase, BRCA1 - breast cancer 1, early onset, TCF12 - transcription factor 12, UHRF1 - ubiquitin-like with phd and ring finger domains 1, ENC1 - ectodermal-neural cortex 1 (with btb domain), RFX3 - reg…
GO:0018393	internal peptidyl-lysine acetylation	5.94e-05	0.0454	3.37	14	[TAF9 - taf9 rna polymerase ii, tata box binding protein (tbp)-associated factor, 32kda, KANSL3 - kat8 regulatory nsl complex subunit 3, PHF16 - phd finger protein 16, TAF5 - taf5 rna polymerase ii, tata box binding protein (tbp)-associated factor, 100kda, OGT - o-linked n-acetylglucosamine (glcnac) transferase, MBIP - map3k12 binding inhibitory protein 1, ATAT1 - alpha tubulin acetyltransferase …
GO:0098722	asymmetric stem cell division	5.72e-05	0.0463	14.76	4	[ETV5 - ets variant 5, TEAD3 - tea domain family member 3, SOX5 - sry (sex determining region y)-box 5, ZBTB16 - zinc finger and btb domain containing 16]
GO:0019219	regulation of nucleobase-containing compound metabolic process	6.49e-05	0.047	1.32	146	[ZNF189 - zinc finger protein 189, EXOSC9 - exosome component 9, ZNF202 - zinc finger protein 202, ZMYM2 - zinc finger, mym-type 2, DDIT3 - dna-damage-inducible transcript 3, BRCA1 - breast cancer 1, early onset, TCF12 - transcription factor 12, UHRF1 - ubiquitin-like with phd and ring finger domains 1, RFX3 - regulatory factor x, 3 (influences hla class ii expression), RBMX - rna binding motif p…
GO:0018394	peptidyl-lysine acetylation	7.57e-05	0.0521	3.3	14	[TAF9 - taf9 rna polymerase ii, tata box binding protein (tbp)-associated factor, 32kda, KANSL3 - kat8 regulatory nsl complex subunit 3, PHF16 - phd finger protein 16, TAF5 - taf5 rna polymerase ii, tata box binding protein (tbp)-associated factor, 100kda, OGT - o-linked n-acetylglucosamine (glcnac) transferase, MBIP - map3k12 binding inhibitory protein 1, ATAT1 - alpha tubulin acetyltransferase …
GO:0006475	internal protein amino acid acetylation	9.57e-05	0.0598	3.23	14	[TAF9 - taf9 rna polymerase ii, tata box binding protein (tbp)-associated factor, 32kda, KANSL3 - kat8 regulatory nsl complex subunit 3, PHF16 - phd finger protein 16, TAF5 - taf5 rna polymerase ii, tata box binding protein (tbp)-associated factor, 100kda, OGT - o-linked n-acetylglucosamine (glcnac) transferase, MBIP - map3k12 binding inhibitory protein 1, ATAT1 - alpha tubulin acetyltransferase …
GO:0010556	regulation of macromolecule biosynthetic process	9.23e-05	0.0605	1.32	143	[ZNF189 - zinc finger protein 189, EXOSC9 - exosome component 9, ZNF202 - zinc finger protein 202, ZMYM2 - zinc finger, mym-type 2, DDIT3 - dna-damage-inducible transcript 3, AARS - alanyl-trna synthetase, BRCA1 - breast cancer 1, early onset, TCF12 - transcription factor 12, UHRF1 - ubiquitin-like with phd and ring finger domains 1, AKAP12 - a kinase (prka) anchor protein 12, ENC1 - ectodermal-n…
GO:0008080	N-acetyltransferase activity	0.000183	0.0801	3.64	11	[TAF9 - taf9 rna polymerase ii, tata box binding protein (tbp)-associated factor, 32kda, KANSL3 - kat8 regulatory nsl complex subunit 3, NAA40 - n(alpha)-acetyltransferase 40, natd catalytic subunit, homolog (s. cerevisiae), TAF9B - taf9b rna polymerase ii, tata box binding protein (tbp)-associated factor, 31kda, KAT6B - k(lysine) acetyltransferase 6b, OGT - o-linked n-acetylglucosamine (glcnac) …
GO:0016607	nuclear speck	0.0004	0.0908	1.99	28	[GRK5 - g protein-coupled receptor kinase 5, SRSF11 - serine/arginine-rich splicing factor 11, LUC7L3 - luc7-like 3 (s. cerevisiae), RBM39 - rna binding motif protein 39, PRPF3 - pre-mrna processing factor 3, SPRTN - sprt-like n-terminal domain, NRDE2 - nrde-2, necessary for rna interference, domain containing, TCF12 - transcription factor 12, PNN - pinin, desmosome associated protein, SRSF10 - s…
GO:0000123	histone acetyltransferase complex	0.000351	0.0913	3.38	11	[TAF9 - taf9 rna polymerase ii, tata box binding protein (tbp)-associated factor, 32kda, KANSL3 - kat8 regulatory nsl complex subunit 3, MSL2 - male-specific lethal 2 homolog (drosophila), TAF9B - taf9b rna polymerase ii, tata box binding protein (tbp)-associated factor, 31kda, PHF16 - phd finger protein 16, KAT6B - k(lysine) acetyltransferase 6b, OGT - o-linked n-acetylglucosamine (glcnac) trans…
GO:0010468	regulation of gene expression	0.000156	0.0934	1.29	154	[MTPAP - mitochondrial poly(a) polymerase, ZNF189 - zinc finger protein 189, EXOSC9 - exosome component 9, ZNF202 - zinc finger protein 202, ZMYM2 - zinc finger, mym-type 2, DDIT3 - dna-damage-inducible transcript 3, AARS - alanyl-trna synthetase, BRCA1 - breast cancer 1, early onset, BRAF - v-raf murine sarcoma viral oncogene homolog b, TCF12 - transcription factor 12, UHRF1 - ubiquitin-like wit…
GO:0016573	histone acetylation	0.000166	0.0953	3.23	13	[TAF9 - taf9 rna polymerase ii, tata box binding protein (tbp)-associated factor, 32kda, KANSL3 - kat8 regulatory nsl complex subunit 3, PHF16 - phd finger protein 16, TAF5 - taf5 rna polymerase ii, tata box binding protein (tbp)-associated factor, 100kda, OGT - o-linked n-acetylglucosamine (glcnac) transferase, MBIP - map3k12 binding inhibitory protein 1, KANSL2 - kat8 regulatory nsl complex sub…
GO:0045892	negative regulation of transcription, DNA-templated	0.000238	0.131	1.62	54	[ZNF189 - zinc finger protein 189, ZNF202 - zinc finger protein 202, PKIA - protein kinase (camp-dependent, catalytic) inhibitor alpha, ZBTB1 - zinc finger and btb domain containing 1, DDIT3 - dna-damage-inducible transcript 3, BRCA1 - breast cancer 1, early onset, NRDE2 - nrde-2, necessary for rna interference, domain containing, XPO1 - exportin 1 (crm1 homolog, yeast), ZNF318 - zinc finger prot…
GO:0016407	acetyltransferase activity	0.000364	0.143	3.16	12	[TAF9 - taf9 rna polymerase ii, tata box binding protein (tbp)-associated factor, 32kda, KANSL3 - kat8 regulatory nsl complex subunit 3, ACAT2 - acetyl-coa acetyltransferase 2, NAA40 - n(alpha)-acetyltransferase 40, natd catalytic subunit, homolog (s. cerevisiae), TAF9B - taf9b rna polymerase ii, tata box binding protein (tbp)-associated factor, 31kda, KAT6B - k(lysine) acetyltransferase 6b, OGT …
GO:0031248	protein acetyltransferase complex	0.000881	0.146	3.04	11	[TAF9 - taf9 rna polymerase ii, tata box binding protein (tbp)-associated factor, 32kda, KANSL3 - kat8 regulatory nsl complex subunit 3, MSL2 - male-specific lethal 2 homolog (drosophila), TAF9B - taf9b rna polymerase ii, tata box binding protein (tbp)-associated factor, 31kda, PHF16 - phd finger protein 16, KAT6B - k(lysine) acetyltransferase 6b, OGT - o-linked n-acetylglucosamine (glcnac) trans…
GO:0016410	N-acyltransferase activity	0.000448	0.16	3.29	11	[TAF9 - taf9 rna polymerase ii, tata box binding protein (tbp)-associated factor, 32kda, KANSL3 - kat8 regulatory nsl complex subunit 3, NAA40 - n(alpha)-acetyltransferase 40, natd catalytic subunit, homolog (s. cerevisiae), TAF9B - taf9b rna polymerase ii, tata box binding protein (tbp)-associated factor, 31kda, KAT6B - k(lysine) acetyltransferase 6b, OGT - o-linked n-acetylglucosamine (glcnac) …
GO:1902493	acetyltransferase complex	0.000881	0.16	3.04	11	[TAF9 - taf9 rna polymerase ii, tata box binding protein (tbp)-associated factor, 32kda, KANSL3 - kat8 regulatory nsl complex subunit 3, MSL2 - male-specific lethal 2 homolog (drosophila), TAF9B - taf9b rna polymerase ii, tata box binding protein (tbp)-associated factor, 31kda, PHF16 - phd finger protein 16, KAT6B - k(lysine) acetyltransferase 6b, OGT - o-linked n-acetylglucosamine (glcnac) trans…
GO:0017145	stem cell division	0.00033	0.168	6.04	6	[ETV5 - ets variant 5, TEAD3 - tea domain family member 3, ASPM - asp (abnormal spindle) homolog, microcephaly associated (drosophila), SOX5 - sry (sex determining region y)-box 5, KIT - v-kit hardy-zuckerman 4 feline sarcoma viral oncogene homolog, ZBTB16 - zinc finger and btb domain containing 16]
GO:1903507	negative regulation of nucleic acid-templated transcription	0.000358	0.17	1.59	55	[ZNF189 - zinc finger protein 189, ZNF202 - zinc finger protein 202, PKIA - protein kinase (camp-dependent, catalytic) inhibitor alpha, ZBTB1 - zinc finger and btb domain containing 1, DDIT3 - dna-damage-inducible transcript 3, BRCA1 - breast cancer 1, early onset, NRDE2 - nrde-2, necessary for rna interference, domain containing, XPO1 - exportin 1 (crm1 homolog, yeast), ZNF318 - zinc finger prot…
GO:0006473	protein acetylation	0.000375	0.172	2.84	14	[TAF9 - taf9 rna polymerase ii, tata box binding protein (tbp)-associated factor, 32kda, KANSL3 - kat8 regulatory nsl complex subunit 3, PHF16 - phd finger protein 16, TAF5 - taf5 rna polymerase ii, tata box binding protein (tbp)-associated factor, 100kda, OGT - o-linked n-acetylglucosamine (glcnac) transferase, MBIP - map3k12 binding inhibitory protein 1, ATAT1 - alpha tubulin acetyltransferase …
GO:0097427	microtubule bundle	0.000854	0.173	13.29	3	[TPPP3 - tubulin polymerization-promoting protein family member 3, ATAT1 - alpha tubulin acetyltransferase 1, TPPP - tubulin polymerization promoting protein]
GO:0033119	negative regulation of RNA splicing	0.00033	0.174	6.04	6	[PTBP2 - polypyrimidine tract binding protein 2, SRSF4 - serine/arginine-rich splicing factor 4, SRSF7 - serine/arginine-rich splicing factor 7, SRSF10 - serine/arginine-rich splicing factor 10, SFSWAP - splicing factor, suppressor of white-apricot homolog (drosophila), RBMX - rna binding motif protein, x-linked]
GO:1902679	negative regulation of RNA biosynthetic process	0.000358	0.176	1.59	55	[ZNF189 - zinc finger protein 189, ZNF202 - zinc finger protein 202, PKIA - protein kinase (camp-dependent, catalytic) inhibitor alpha, ZBTB1 - zinc finger and btb domain containing 1, DDIT3 - dna-damage-inducible transcript 3, BRCA1 - breast cancer 1, early onset, NRDE2 - nrde-2, necessary for rna interference, domain containing, XPO1 - exportin 1 (crm1 homolog, yeast), ZNF318 - zinc finger prot…
GO:0006325	chromatin organization	0.000523	0.232	1.75	38	[TAF9 - taf9 rna polymerase ii, tata box binding protein (tbp)-associated factor, 32kda, KANSL3 - kat8 regulatory nsl complex subunit 3, MYSM1 - myb-like, swirm and mpn domains 1, TAF5 - taf5 rna polymerase ii, tata box binding protein (tbp)-associated factor, 100kda, ZBTB1 - zinc finger and btb domain containing 1, AURKB - aurora kinase b, NRDE2 - nrde-2, necessary for rna interference, domain c…
GO:0006357	regulation of transcription by RNA polymerase II	0.000617	0.265	1.39	87	[ZNF189 - zinc finger protein 189, EXOSC9 - exosome component 9, ZNF202 - zinc finger protein 202, PKIA - protein kinase (camp-dependent, catalytic) inhibitor alpha, ZMYM2 - zinc finger, mym-type 2, ZBTB1 - zinc finger and btb domain containing 1, DDIT3 - dna-damage-inducible transcript 3, BRCA1 - breast cancer 1, early onset, TCF12 - transcription factor 12, DMTF1 - cyclin d binding myb-like tra…
GO:0009881	photoreceptor activity	0.000854	0.28	13.29	3	[ELOVL4 - elovl fatty acid elongase 4, GPR52 - g protein-coupled receptor 52, CRY1 - cryptochrome 1 (photolyase-like)]
GO:0016569	covalent chromatin modification	0.000707	0.286	2.01	25	[TAF9 - taf9 rna polymerase ii, tata box binding protein (tbp)-associated factor, 32kda, KANSL3 - kat8 regulatory nsl complex subunit 3, MYSM1 - myb-like, swirm and mpn domains 1, TAF5 - taf5 rna polymerase ii, tata box binding protein (tbp)-associated factor, 100kda, AURKB - aurora kinase b, UHRF1 - ubiquitin-like with phd and ring finger domains 1, SETD6 - set domain containing 6, MSL2 - male-s…
GO:0008356	asymmetric cell division	0.000693	0.289	8.86	4	[ETV5 - ets variant 5, TEAD3 - tea domain family member 3, SOX5 - sry (sex determining region y)-box 5, ZBTB16 - zinc finger and btb domain containing 16]
GO:2000113	negative regulation of cellular macromolecule biosynthetic process	0.000797	0.313	1.5	60	[ZNF189 - zinc finger protein 189, ZNF202 - zinc finger protein 202, PKIA - protein kinase (camp-dependent, catalytic) inhibitor alpha, ZBTB1 - zinc finger and btb domain containing 1, DDIT3 - dna-damage-inducible transcript 3, NRDE2 - nrde-2, necessary for rna interference, domain containing, BRCA1 - breast cancer 1, early onset, ENC1 - ectodermal-neural cortex 1 (with btb domain), XPO1 - export…
GO:0031326	regulation of cellular biosynthetic process	0.000833	0.319	1.26	143	[ZNF189 - zinc finger protein 189, EXOSC9 - exosome component 9, ZNF202 - zinc finger protein 202, ZMYM2 - zinc finger, mym-type 2, DDIT3 - dna-damage-inducible transcript 3, AARS - alanyl-trna synthetase, BRCA1 - breast cancer 1, early onset, TCF12 - transcription factor 12, UHRF1 - ubiquitin-like with phd and ring finger domains 1, AKAP12 - a kinase (prka) anchor protein 12, ENC1 - ectodermal-n…
GO:0010629	negative regulation of gene expression	0.000892	0.332	1.44	72	[MTPAP - mitochondrial poly(a) polymerase, ZNF189 - zinc finger protein 189, EXOSC9 - exosome component 9, ZNF202 - zinc finger protein 202, PKIA - protein kinase (camp-dependent, catalytic) inhibitor alpha, ZBTB1 - zinc finger and btb domain containing 1, DDIT3 - dna-damage-inducible transcript 3, NRDE2 - nrde-2, necessary for rna interference, domain containing, BRCA1 - breast cancer 1, early o…
GO:0048025	negative regulation of mRNA splicing, via spliceosome	0.000965	0.349	6.15	5	[SRSF4 - serine/arginine-rich splicing factor 4, SRSF7 - serine/arginine-rich splicing factor 7, SFSWAP - splicing factor, suppressor of white-apricot homolog (drosophila), SRSF10 - serine/arginine-rich splicing factor 10, RBMX - rna binding motif protein, x-linked]

## Sheet: TableS7C
Table S7C. GO Terms among upregulated genes in low stress group (post- vs. pre-weaning)
GO Term	Description	P-value	FDR q-value	Enrichment	No. Genes	Genes
GO:0006952	defense response	3.55e-40	4.89e-36	7.22	65	[MR1 - major histocompatibility complex, class i-related, IFIT2 - interferon-induced protein with tetratricopeptide repeats 2, DHX58 - dexh (asp-glu-x-his) box polypeptide 58, LGALS3BP - lectin, galactoside-binding, soluble, 3 binding protein, FN1 - fibronectin 1, DTX3L - deltex 3-like (drosophila), DDX60 - dead (asp-glu-ala-asp) box polypeptide 60, UNC93B1 - unc-93 homolog b1 (c. elegans), TICAM…
GO:0002376	immune system process	2.33e-35	1.61e-31	4.13	85	[MR1 - major histocompatibility complex, class i-related, IFIT2 - interferon-induced protein with tetratricopeptide repeats 2, DHX58 - dexh (asp-glu-x-his) box polypeptide 58, LGMN - legumain, FN1 - fibronectin 1, DTX3L - deltex 3-like (drosophila), UNC93B1 - unc-93 homolog b1 (c. elegans), DDX60 - dead (asp-glu-ala-asp) box polypeptide 60, PTPRO - protein tyrosine phosphatase, receptor type, o, …
GO:0051607	defense response to virus	5.58e-35	2.57e-31	17.82	35	[IFIT2 - interferon-induced protein with tetratricopeptide repeats 2, DHX58 - dexh (asp-glu-x-his) box polypeptide 58, IRF9 - interferon regulatory factor 9, DTX3L - deltex 3-like (drosophila), STAT2 - signal transducer and activator of transcription 2, 113kda, ISG20 - interferon stimulated exonuclease gene 20kda, DDX60 - dead (asp-glu-ala-asp) box polypeptide 60, UNC93B1 - unc-93 homolog b1 (c. …
GO:0098542	defense response to other organism	2.08e-33	7.16e-30	12.51	40	[MR1 - major histocompatibility complex, class i-related, IFIT2 - interferon-induced protein with tetratricopeptide repeats 2, DHX58 - dexh (asp-glu-x-his) box polypeptide 58, IRF9 - interferon regulatory factor 9, DTX3L - deltex 3-like (drosophila), ISG20 - interferon stimulated exonuclease gene 20kda, DDX60 - dead (asp-glu-ala-asp) box polypeptide 60, UNC93B1 - unc-93 homolog b1 (c. elegans), S…
GO:0043207	response to external biotic stimulus	3.42e-33	9.43e-30	7.37	54	[MR1 - major histocompatibility complex, class i-related, IFIT2 - interferon-induced protein with tetratricopeptide repeats 2, DHX58 - dexh (asp-glu-x-his) box polypeptide 58, DTX3L - deltex 3-like (drosophila), UNC93B1 - unc-93 homolog b1 (c. elegans), DDX60 - dead (asp-glu-ala-asp) box polypeptide 60, TICAM1 - toll-like receptor adaptor molecule 1, CD274 - cd274 molecule, IL23A - interleukin 23…
GO:0009607	response to biotic stimulus	3.17e-32	7.29e-29	7.06	54	[MR1 - major histocompatibility complex, class i-related, IFIT2 - interferon-induced protein with tetratricopeptide repeats 2, DHX58 - dexh (asp-glu-x-his) box polypeptide 58, DTX3L - deltex 3-like (drosophila), UNC93B1 - unc-93 homolog b1 (c. elegans), DDX60 - dead (asp-glu-ala-asp) box polypeptide 60, CD274 - cd274 molecule, TICAM1 - toll-like receptor adaptor molecule 1, IL23A - interleukin 23…
GO:0019221	cytokine-mediated signaling pathway	8.17e-30	1.61e-26	7.58	48	[IFIT2 - interferon-induced protein with tetratricopeptide repeats 2, TIMP1 - timp metallopeptidase inhibitor 1, PSME2 - proteasome (prosome, macropain) activator subunit 2 (pa28 beta), FN1 - fibronectin 1, IRF9 - interferon regulatory factor 9, CMKLR1 - chemokine-like receptor 1, IFI35 - interferon-induced protein 35, ISG20 - interferon stimulated exonuclease gene 20kda, STAT2 - signal transduce…
GO:0006955	immune response	9.05e-30	1.56e-26	6.51	53	[MR1 - major histocompatibility complex, class i-related, DHX58 - dexh (asp-glu-x-his) box polypeptide 58, DTX3L - deltex 3-like (drosophila), UNC93B1 - unc-93 homolog b1 (c. elegans), DDX60 - dead (asp-glu-ala-asp) box polypeptide 60, CD274 - cd274 molecule, TICAM1 - toll-like receptor adaptor molecule 1, IL23A - interleukin 23, alpha subunit p19, TMEM106A - transmembrane protein 106a, TMEM173 -…
GO:0009615	response to virus	2.02e-29	3.1e-26	12.06	36	[IFIT2 - interferon-induced protein with tetratricopeptide repeats 2, DHX58 - dexh (asp-glu-x-his) box polypeptide 58, IRF9 - interferon regulatory factor 9, DTX3L - deltex 3-like (drosophila), ISG20 - interferon stimulated exonuclease gene 20kda, DDX60 - dead (asp-glu-ala-asp) box polypeptide 60, UNC93B1 - unc-93 homolog b1 (c. elegans), STAT2 - signal transducer and activator of transcription 2…
GO:0051707	response to other organism	1.14e-27	1.57e-24	8.36	42	[MR1 - major histocompatibility complex, class i-related, IFIT2 - interferon-induced protein with tetratricopeptide repeats 2, DHX58 - dexh (asp-glu-x-his) box polypeptide 58, IRF9 - interferon regulatory factor 9, DTX3L - deltex 3-like (drosophila), ISG20 - interferon stimulated exonuclease gene 20kda, DDX60 - dead (asp-glu-ala-asp) box polypeptide 60, UNC93B1 - unc-93 homolog b1 (c. elegans), S…
GO:0009605	response to external stimulus	2.99e-25	3.75e-22	4.6	59	[MR1 - major histocompatibility complex, class i-related, IFIT2 - interferon-induced protein with tetratricopeptide repeats 2, DHX58 - dexh (asp-glu-x-his) box polypeptide 58, DTX3L - deltex 3-like (drosophila), DDX60 - dead (asp-glu-ala-asp) box polypeptide 60, UNC93B1 - unc-93 homolog b1 (c. elegans), CD274 - cd274 molecule, TICAM1 - toll-like receptor adaptor molecule 1, IL23A - interleukin 23…
GO:0002252	immune effector process	1.67e-23	1.92e-20	5.21	50	[IFIT2 - interferon-induced protein with tetratricopeptide repeats 2, DHX58 - dexh (asp-glu-x-his) box polypeptide 58, DTX3L - deltex 3-like (drosophila), UNC93B1 - unc-93 homolog b1 (c. elegans), DDX60 - dead (asp-glu-ala-asp) box polypeptide 60, TICAM1 - toll-like receptor adaptor molecule 1, IL23A - interleukin 23, alpha subunit p19, TMEM173 - transmembrane protein 173, PML - promyelocytic leu…
GO:0045087	innate immune response	3.97e-22	4.21e-19	8.63	33	[MR1 - major histocompatibility complex, class i-related, DHX58 - dexh (asp-glu-x-his) box polypeptide 58, DTX3L - deltex 3-like (drosophila), DDX60 - dead (asp-glu-ala-asp) box polypeptide 60, UNC93B1 - unc-93 homolog b1 (c. elegans), CLEC7A - c-type lectin domain family 7, member a, TICAM1 - toll-like receptor adaptor molecule 1, IL23A - interleukin 23, alpha subunit p19, ADAR - adenosine deami…
GO:0060337	type I interferon signaling pathway	1.12e-21	1.1e-18	29.38	17	[IFIT2 - interferon-induced protein with tetratricopeptide repeats 2, RSAD2 - radical s-adenosyl methionine domain containing 2, IFITM3 - interferon induced transmembrane protein 3, IRF9 - interferon regulatory factor 9, IFI35 - interferon-induced protein 35, STAT2 - signal transducer and activator of transcription 2, 113kda, ISG20 - interferon stimulated exonuclease gene 20kda, STAT1 - signal tr…
GO:0050896	response to stimulus	1.93e-21	1.78e-18	2.22	103	[DHX58 - dexh (asp-glu-x-his) box polypeptide 58, LGMN - legumain, LGALS3BP - lectin, galactoside-binding, soluble, 3 binding protein, FN1 - fibronectin 1, DTX3L - deltex 3-like (drosophila), DDX60 - dead (asp-glu-ala-asp) box polypeptide 60, UNC93B1 - unc-93 homolog b1 (c. elegans), CD274 - cd274 molecule, TICAM1 - toll-like receptor adaptor molecule 1, TMEM106A - transmembrane protein 106a, TME…
GO:0031347	regulation of defense response	5.62e-21	4.85e-18	5.5	43	[FFAR2 - free fatty acid receptor 2, DHX58 - dexh (asp-glu-x-his) box polypeptide 58, LGMN - legumain, PSME2 - proteasome (prosome, macropain) activator subunit 2 (pa28 beta), USP18 - ubiquitin specific peptidase 18, DTX3L - deltex 3-like (drosophila), DDX60 - dead (asp-glu-ala-asp) box polypeptide 60, UNC93B1 - unc-93 homolog b1 (c. elegans), STAT1 - signal transducer and activator of transcript…
GO:0006950	response to stress	1.48e-19	1.2e-16	2.68	79	[MR1 - major histocompatibility complex, class i-related, IFIT2 - interferon-induced protein with tetratricopeptide repeats 2, ARID3A - at rich interactive domain 3a (bright-like), DHX58 - dexh (asp-glu-x-his) box polypeptide 58, LGALS3BP - lectin, galactoside-binding, soluble, 3 binding protein, FN1 - fibronectin 1, DTX3L - deltex 3-like (drosophila), UNC93B1 - unc-93 homolog b1 (c. elegans), DD…
GO:0002682	regulation of immune system process	4.14e-19	3.17e-16	3.67	56	[DHX58 - dexh (asp-glu-x-his) box polypeptide 58, LGMN - legumain, USP18 - ubiquitin specific peptidase 18, DTX3L - deltex 3-like (drosophila), DDX60 - dead (asp-glu-ala-asp) box polypeptide 60, UNC93B1 - unc-93 homolog b1 (c. elegans), HLX - h2.0-like homeobox, TICAM1 - toll-like receptor adaptor molecule 1, CD274 - cd274 molecule, IL23A - interleukin 23, alpha subunit p19, TMEM173 - transmembra…
GO:0051704	multi-organism process	6.76e-19	4.9e-16	3.85	53	[MR1 - major histocompatibility complex, class i-related, IFIT2 - interferon-induced protein with tetratricopeptide repeats 2, DHX58 - dexh (asp-glu-x-his) box polypeptide 58, FN1 - fibronectin 1, DTX3L - deltex 3-like (drosophila), DDX60 - dead (asp-glu-ala-asp) box polypeptide 60, UNC93B1 - unc-93 homolog b1 (c. elegans), TICAM1 - toll-like receptor adaptor molecule 1, IL23A - interleukin 23, a…
GO:0050776	regulation of immune response	1e-17	6.92e-15	4.41	44	[FFAR2 - free fatty acid receptor 2, DHX58 - dexh (asp-glu-x-his) box polypeptide 58, LGMN - legumain, PSME2 - proteasome (prosome, macropain) activator subunit 2 (pa28 beta), USP18 - ubiquitin specific peptidase 18, CMKLR1 - chemokine-like receptor 1, DDX60 - dead (asp-glu-ala-asp) box polypeptide 60, UNC93B1 - unc-93 homolog b1 (c. elegans), STAT1 - signal transducer and activator of transcript…
GO:0032101	regulation of response to external stimulus	6.79e-17	4.46e-14	4.94	38	[FFAR2 - free fatty acid receptor 2, DHX58 - dexh (asp-glu-x-his) box polypeptide 58, LGMN - legumain, USP18 - ubiquitin specific peptidase 18, CMKLR1 - chemokine-like receptor 1, DTX3L - deltex 3-like (drosophila), DDX60 - dead (asp-glu-ala-asp) box polypeptide 60, PTPRO - protein tyrosine phosphatase, receptor type, o, STAT1 - signal transducer and activator of transcription 1, 91kda, CLEC7A - …
GO:0001817	regulation of cytokine production	8.05e-17	5.05e-14	5.07	37	[FFAR2 - free fatty acid receptor 2, DHX58 - dexh (asp-glu-x-his) box polypeptide 58, FN1 - fibronectin 1, CMKLR1 - chemokine-like receptor 1, DDX60 - dead (asp-glu-ala-asp) box polypeptide 60, STAT1 - signal transducer and activator of transcription 1, 91kda, CLEC7A - c-type lectin domain family 7, member a, SPHK1 - sphingosine kinase 1, CD274 - cd274 molecule, TICAM1 - toll-like receptor adapto…
GO:0007166	cell surface receptor signaling pathway	6.07e-16	3.64e-13	2.99	59	[IFIT2 - interferon-induced protein with tetratricopeptide repeats 2, TIMP1 - timp metallopeptidase inhibitor 1, FN1 - fibronectin 1, DTX3L - deltex 3-like (drosophila), IFI35 - interferon-induced protein 35, CD274 - cd274 molecule, TICAM1 - toll-like receptor adaptor molecule 1, IL23A - interleukin 23, alpha subunit p19, PML - promyelocytic leukemia, TLR2 - toll-like receptor 2, SPI1 - spleen fo…
GO:0080134	regulation of response to stress	1.26e-15	7.25e-13	3.3	52	[DHX58 - dexh (asp-glu-x-his) box polypeptide 58, LGMN - legumain, USP18 - ubiquitin specific peptidase 18, DTX3L - deltex 3-like (drosophila), DDX60 - dead (asp-glu-ala-asp) box polypeptide 60, UNC93B1 - unc-93 homolog b1 (c. elegans), TICAM1 - toll-like receptor adaptor molecule 1, IL23A - interleukin 23, alpha subunit p19, TMEM173 - transmembrane protein 173, IDO1 - indoleamine 2,3-dioxygenase…
GO:0045088	regulation of innate immune response	1.31e-15	7.23e-13	6.24	29	[FFAR2 - free fatty acid receptor 2, DHX58 - dexh (asp-glu-x-his) box polypeptide 58, LGMN - legumain, USP18 - ubiquitin specific peptidase 18, PSME2 - proteasome (prosome, macropain) activator subunit 2 (pa28 beta), DDX60 - dead (asp-glu-ala-asp) box polypeptide 60, UNC93B1 - unc-93 homolog b1 (c. elegans), STAT1 - signal transducer and activator of transcription 1, 91kda, CLEC7A - c-type lectin…
GO:0002684	positive regulation of immune system process	1.41e-14	7.48e-12	3.99	40	[FFAR2 - free fatty acid receptor 2, DHX58 - dexh (asp-glu-x-his) box polypeptide 58, LGMN - legumain, PSME2 - proteasome (prosome, macropain) activator subunit 2 (pa28 beta), CMKLR1 - chemokine-like receptor 1, UNC93B1 - unc-93 homolog b1 (c. elegans), DDX60 - dead (asp-glu-ala-asp) box polypeptide 60, STAT1 - signal transducer and activator of transcription 1, 91kda, CLEC7A - c-type lectin doma…
GO:0001819	positive regulation of cytokine production	3.96e-14	2.02e-11	5.99	27	[FFAR2 - free fatty acid receptor 2, DHX58 - dexh (asp-glu-x-his) box polypeptide 58, DDX60 - dead (asp-glu-ala-asp) box polypeptide 60, STAT1 - signal transducer and activator of transcription 1, 91kda, CLEC7A - c-type lectin domain family 7, member a, SPHK1 - sphingosine kinase 1, CD274 - cd274 molecule, TICAM1 - toll-like receptor adaptor molecule 1, IL23A - interleukin 23, alpha subunit p19, …
GO:0060333	interferon-gamma-mediated signaling pathway	4.88e-14	2.4e-11	19.4	13	[IRF9 - interferon regulatory factor 9, STAT1 - signal transducer and activator of transcription 1, 91kda, TRIM21 - tripartite motif containing 21, GBP2 - guanylate binding protein 2, interferon-inducible, FCGR1A - fc fragment of igg, high affinity ia, receptor (cd64), IRF1 - interferon regulatory factor 1, IRF7 - interferon regulatory factor 7, PML - promyelocytic leukemia, VCAM1 - vascular cell…
GO:0050778	positive regulation of immune response	2.63e-13	1.25e-10	4.57	32	[FFAR2 - free fatty acid receptor 2, DHX58 - dexh (asp-glu-x-his) box polypeptide 58, LGMN - legumain, PSME2 - proteasome (prosome, macropain) activator subunit 2 (pa28 beta), CMKLR1 - chemokine-like receptor 1, UNC93B1 - unc-93 homolog b1 (c. elegans), DDX60 - dead (asp-glu-ala-asp) box polypeptide 60, CLEC7A - c-type lectin domain family 7, member a, CD274 - cd274 molecule, TICAM1 - toll-like r…
GO:0048584	positive regulation of response to stimulus	5.12e-13	2.35e-10	2.65	57	[DHX58 - dexh (asp-glu-x-his) box polypeptide 58, LGMN - legumain, DTX3L - deltex 3-like (drosophila), DDX60 - dead (asp-glu-ala-asp) box polypeptide 60, UNC93B1 - unc-93 homolog b1 (c. elegans), HLX - h2.0-like homeobox, TICAM1 - toll-like receptor adaptor molecule 1, CD274 - cd274 molecule, TMEM106A - transmembrane protein 106a, IL23A - interleukin 23, alpha subunit p19, TMEM173 - transmembrane…
GO:0043900	regulation of multi-organism process	5.37e-13	2.39e-10	5.91	25	[TIMP1 - timp metallopeptidase inhibitor 1, DHX58 - dexh (asp-glu-x-his) box polypeptide 58, DTX3L - deltex 3-like (drosophila), DDX60 - dead (asp-glu-ala-asp) box polypeptide 60, ISG20 - interferon stimulated exonuclease gene 20kda, STAT1 - signal transducer and activator of transcription 1, 91kda, CLEC7A - c-type lectin domain family 7, member a, ADAR - adenosine deaminase, rna-specific, IL23A …
GO:0007165	signal transduction	1.25e-12	5.39e-10	2.05	79	[IFIT2 - interferon-induced protein with tetratricopeptide repeats 2, ARID3A - at rich interactive domain 3a (bright-like), TIMP1 - timp metallopeptidase inhibitor 1, LGALS3BP - lectin, galactoside-binding, soluble, 3 binding protein, LGMN - legumain, FN1 - fibronectin 1, DTX3L - deltex 3-like (drosophila), IFI35 - interferon-induced protein 35, UNC93B1 - unc-93 homolog b1 (c. elegans), TICAM1 - …
GO:0031349	positive regulation of defense response	2.2e-12	9.2e-10	5.55	25	[FFAR2 - free fatty acid receptor 2, DHX58 - dexh (asp-glu-x-his) box polypeptide 58, LGMN - legumain, PSME2 - proteasome (prosome, macropain) activator subunit 2 (pa28 beta), DDX60 - dead (asp-glu-ala-asp) box polypeptide 60, UNC93B1 - unc-93 homolog b1 (c. elegans), CLEC7A - c-type lectin domain family 7, member a, TICAM1 - toll-like receptor adaptor molecule 1, IL23A - interleukin 23, alpha su…
GO:0006954	inflammatory response	4.35e-12	1.77e-09	5.95	23	[CSF1 - colony stimulating factor 1 (macrophage), FN1 - fibronectin 1, CMKLR1 - chemokine-like receptor 1, CLEC7A - c-type lectin domain family 7, member a, CXCL10 - chemokine (c-x-c motif) ligand 10, IL1RAP - interleukin 1 receptor accessory protein, TREM1 - triggering receptor expressed on myeloid cells 1, CCR1 - chemokine (c-c motif) receptor 1, TICAM1 - toll-like receptor adaptor molecule 1, …
GO:0002697	regulation of immune effector process	1.23e-11	4.83e-09	5.66	23	[RSAD2 - radical s-adenosyl methionine domain containing 2, FFAR2 - free fatty acid receptor 2, DHX58 - dexh (asp-glu-x-his) box polypeptide 58, DTX3L - deltex 3-like (drosophila), DDX60 - dead (asp-glu-ala-asp) box polypeptide 60, SERPING1 - serpin peptidase inhibitor, clade g (c1 inhibitor), member 1, STAT1 - signal transducer and activator of transcription 1, 91kda, TICAM1 - toll-like receptor…
GO:0032103	positive regulation of response to external stimulus	1.38e-11	5.29e-09	6.7	20	[CSF1 - colony stimulating factor 1 (macrophage), FFAR2 - free fatty acid receptor 2, DHX58 - dexh (asp-glu-x-his) box polypeptide 58, LGMN - legumain, CMKLR1 - chemokine-like receptor 1, DDX60 - dead (asp-glu-ala-asp) box polypeptide 60, CLEC7A - c-type lectin domain family 7, member a, CXCL10 - chemokine (c-x-c motif) ligand 10, CCR1 - chemokine (c-c motif) receptor 1, TICAM1 - toll-like recept…
GO:0050727	regulation of inflammatory response	7.17e-11	2.67e-08	5.77	21	[FFAR2 - free fatty acid receptor 2, SOCS3 - suppressor of cytokine signaling 3, USP18 - ubiquitin specific peptidase 18, SERPING1 - serpin peptidase inhibitor, clade g (c1 inhibitor), member 1, CLEC7A - c-type lectin domain family 7, member a, SPHK1 - sphingosine kinase 1, TICAM1 - toll-like receptor adaptor molecule 1, C2 - complement component 2, IL23A - interleukin 23, alpha subunit p19, GHSR…
GO:0048583	regulation of response to stimulus	1.14e-10	4.13e-08	1.94	76	[TIMP1 - timp metallopeptidase inhibitor 1, DHX58 - dexh (asp-glu-x-his) box polypeptide 58, LGMN - legumain, USP18 - ubiquitin specific peptidase 18, FN1 - fibronectin 1, DTX3L - deltex 3-like (drosophila), UNC93B1 - unc-93 homolog b1 (c. elegans), DDX60 - dead (asp-glu-ala-asp) box polypeptide 60, PTPRO - protein tyrosine phosphatase, receptor type, o, CD274 - cd274 molecule, TICAM1 - toll-like…
GO:0045089	positive regulation of innate immune response	1.24e-10	4.39e-08	5.94	20	[RSAD2 - radical s-adenosyl methionine domain containing 2, FFAR2 - free fatty acid receptor 2, DHX58 - dexh (asp-glu-x-his) box polypeptide 58, LGMN - legumain, PSMA5 - proteasome (prosome, macropain) subunit, alpha type, 5, PSME2 - proteasome (prosome, macropain) activator subunit 2 (pa28 beta), DDX60 - dead (asp-glu-ala-asp) box polypeptide 60, UNC93B1 - unc-93 homolog b1 (c. elegans), PSMB10 …
GO:0034097	response to cytokine	2.11e-10	7.27e-08	4.32	26	[IFIT2 - interferon-induced protein with tetratricopeptide repeats 2, TIMP1 - timp metallopeptidase inhibitor 1, STAT1 - signal transducer and activator of transcription 1, 91kda, JUNB - jun b proto-oncogene, SPHK1 - sphingosine kinase 1, CD274 - cd274 molecule, ADAR - adenosine deaminase, rna-specific, TMEM173 - transmembrane protein 173, MX2 - myxovirus (influenza virus) resistance 2 (mouse), P…
GO:0048525	negative regulation of viral process	2.44e-10	8.2e-08	11.94	12	[RSAD2 - radical s-adenosyl methionine domain containing 2, IFITM3 - interferon induced transmembrane protein 3, MX1 - myxovirus (influenza virus) resistance 1, interferon-inducible protein p78 (mouse), PML - promyelocytic leukemia, ISG20 - interferon stimulated exonuclease gene 20kda, STAT1 - signal transducer and activator of transcription 1, 91kda, TRIM21 - tripartite motif containing 21, OAS1…
GO:1903901	negative regulation of viral life cycle	4.78e-10	1.57e-07	13.13	11	[RSAD2 - radical s-adenosyl methionine domain containing 2, IFITM3 - interferon induced transmembrane protein 3, MX1 - myxovirus (influenza virus) resistance 1, interferon-inducible protein p78 (mouse), PML - promyelocytic leukemia, ISG20 - interferon stimulated exonuclease gene 20kda, TRIM21 - tripartite motif containing 21, OAS1 - 2'-5'-oligoadenylate synthetase 1, 40/46kda, OAS2 - 2'-5'-oligoa…
GO:0051239	regulation of multicellular organismal process	5.41e-10	1.73e-07	2.16	60	[TIMP1 - timp metallopeptidase inhibitor 1, DHX58 - dexh (asp-glu-x-his) box polypeptide 58, LGMN - legumain, FN1 - fibronectin 1, DDX60 - dead (asp-glu-ala-asp) box polypeptide 60, PTPRO - protein tyrosine phosphatase, receptor type, o, TICAM1 - toll-like receptor adaptor molecule 1, CD274 - cd274 molecule, HLX - h2.0-like homeobox, IL23A - interleukin 23, alpha subunit p19, TMEM173 - transmembr…
GO:0032479	regulation of type I interferon production	8.06e-10	2.53e-07	8.51	14	[DHX58 - dexh (asp-glu-x-his) box polypeptide 58, UBE2L6 - ubiquitin-conjugating enzyme e2l 6, STAT1 - signal transducer and activator of transcription 1, 91kda, TRIM21 - tripartite motif containing 21, ZBP1 - z-dna binding protein 1, TICAM1 - toll-like receptor adaptor molecule 1, TMEM173 - transmembrane protein 173, IRF1 - interferon regulatory factor 1, IRF7 - interferon regulatory factor 7, H…
GO:0043901	negative regulation of multi-organism process	9.13e-10	2.8e-07	8.43	14	[RSAD2 - radical s-adenosyl methionine domain containing 2, TIMP1 - timp metallopeptidase inhibitor 1, IFITM3 - interferon induced transmembrane protein 3, DHX58 - dexh (asp-glu-x-his) box polypeptide 58, ISG20 - interferon stimulated exonuclease gene 20kda, STAT1 - signal transducer and activator of transcription 1, 91kda, TRIM21 - tripartite motif containing 21, PLSCR1 - phospholipid scramblase…
GO:0060759	regulation of response to cytokine stimulus	1.28e-09	3.83e-07	7.46	15	[CSF1 - colony stimulating factor 1 (macrophage), SOCS3 - suppressor of cytokine signaling 3, USP18 - ubiquitin specific peptidase 18, STAT1 - signal transducer and activator of transcription 1, 91kda, SPHK1 - sphingosine kinase 1, ZBP1 - z-dna binding protein 1, ADAR - adenosine deaminase, rna-specific, IRF7 - interferon regulatory factor 7, PARP14 - poly (adp-ribose) polymerase family, member 1…
GO:0001818	negative regulation of cytokine production	6.43e-09	1.89e-06	5.7	17	[DHX58 - dexh (asp-glu-x-his) box polypeptide 58, FN1 - fibronectin 1, CMKLR1 - chemokine-like receptor 1, UBE2L6 - ubiquitin-conjugating enzyme e2l 6, CD274 - cd274 molecule, GHSR - growth hormone secretagogue receptor, TNFRSF4 - tumor necrosis factor receptor superfamily, member 4, IL23A - interleukin 23, alpha subunit p19, VSIG4 - v-set and immunoglobulin domain containing 4, NLRP12 - nlr fami…
GO:0045071	negative regulation of viral genome replication	8.03e-09	2.31e-06	14.42	9	[RSAD2 - radical s-adenosyl methionine domain containing 2, IFITM3 - interferon induced transmembrane protein 3, MX1 - myxovirus (influenza virus) resistance 1, interferon-inducible protein p78 (mouse), ISG20 - interferon stimulated exonuclease gene 20kda, OAS1 - 2'-5'-oligoadenylate synthetase 1, 40/46kda, OAS2 - 2'-5'-oligoadenylate synthetase 2, 69/71kda, EIF2AK2 - eukaryotic translation initi…
GO:0050688	regulation of defense response to virus	9.73e-09	2.74e-06	11.73	10	[IL23A - interleukin 23, alpha subunit p19, TMEM173 - transmembrane protein 173, DHX58 - dexh (asp-glu-x-his) box polypeptide 58, HERC5 - hect and rld domain containing e3 ubiquitin protein ligase 5, DTX3L - deltex 3-like (drosophila), IL27 - interleukin 27, DDX60 - dead (asp-glu-ala-asp) box polypeptide 60, PARP9 - poly (adp-ribose) polymerase family, member 9, STAT1 - signal transducer and acti…
GO:0002230	positive regulation of defense response to virus by host	1.09e-08	2.99e-06	22.98	7	[IL23A - interleukin 23, alpha subunit p19, TMEM173 - transmembrane protein 173, DTX3L - deltex 3-like (drosophila), IL27 - interleukin 27, PARP9 - poly (adp-ribose) polymerase family, member 9, STAT1 - signal transducer and activator of transcription 1, 91kda, DDX58 - dead (asp-glu-ala-asp) box polypeptide 58]
GO:0002237	response to molecule of bacterial origin	1.09e-08	2.96e-06	5.5	17	[CSF3 - colony stimulating factor 3 (granulocyte), CMPK2 - cytidine monophosphate (ump-cmp) kinase 2, mitochondrial, JUNB - jun b proto-oncogene, CXCL10 - chemokine (c-x-c motif) ligand 10, TICAM1 - toll-like receptor adaptor molecule 1, CD274 - cd274 molecule, GHSR - growth hormone secretagogue receptor, IDO1 - indoleamine 2,3-dioxygenase 1, CD180 - cd180 molecule, TLR2 - toll-like receptor 2, V…
GO:0051240	positive regulation of multicellular organismal process	1.51e-08	4.01e-06	2.55	40	[FFAR2 - free fatty acid receptor 2, DHX58 - dexh (asp-glu-x-his) box polypeptide 58, LGMN - legumain, FN1 - fibronectin 1, CMKLR1 - chemokine-like receptor 1, DDX60 - dead (asp-glu-ala-asp) box polypeptide 60, STAT1 - signal transducer and activator of transcription 1, 91kda, CLEC7A - c-type lectin domain family 7, member a, SPHK1 - sphingosine kinase 1, TICAM1 - toll-like receptor adaptor molec…
GO:0060760	positive regulation of response to cytokine stimulus	1.56e-08	4.06e-06	13.43	9	[CSF1 - colony stimulating factor 1 (macrophage), IRF7 - interferon regulatory factor 7, PARP14 - poly (adp-ribose) polymerase family, member 14, TLR2 - toll-like receptor 2, PARP9 - poly (adp-ribose) polymerase family, member 9, TLR4 - toll-like receptor 4, DDX58 - dead (asp-glu-ala-asp) box polypeptide 58, ZBP1 - z-dna binding protein 1, CASP1 - caspase 1, apoptosis-related cysteine peptidase]
GO:0002831	regulation of response to biotic stimulus	2.65e-08	6.77e-06	8.04	12	[IL23A - interleukin 23, alpha subunit p19, TMEM173 - transmembrane protein 173, DHX58 - dexh (asp-glu-x-his) box polypeptide 58, HERC5 - hect and rld domain containing e3 ubiquitin protein ligase 5, DTX3L - deltex 3-like (drosophila), CD180 - cd180 molecule, IL27 - interleukin 27, DDX60 - dead (asp-glu-ala-asp) box polypeptide 60, PARP9 - poly (adp-ribose) polymerase family, member 9, STAT1 - si…
GO:1903900	regulation of viral life cycle	2.98e-08	7.46e-06	7.96	12	[ADAR - adenosine deaminase, rna-specific, RSAD2 - radical s-adenosyl methionine domain containing 2, IFITM3 - interferon induced transmembrane protein 3, MX1 - myxovirus (influenza virus) resistance 1, interferon-inducible protein p78 (mouse), PML - promyelocytic leukemia, ISG20 - interferon stimulated exonuclease gene 20kda, TRIM21 - tripartite motif containing 21, OAS1 - 2'-5'-oligoadenylate s…
GO:0051241	negative regulation of multicellular organismal process	3.38e-08	8.33e-06	2.96	31	[TIMP1 - timp metallopeptidase inhibitor 1, DHX58 - dexh (asp-glu-x-his) box polypeptide 58, LGMN - legumain, FN1 - fibronectin 1, CMKLR1 - chemokine-like receptor 1, PTPRO - protein tyrosine phosphatase, receptor type, o, STAT1 - signal transducer and activator of transcription 1, 91kda, CCR1 - chemokine (c-c motif) receptor 1, CD274 - cd274 molecule, HLX - h2.0-like homeobox, IL23A - interleuki…
GO:0032496	response to lipopolysaccharide	3.51e-08	8.49e-06	5.44	16	[CSF3 - colony stimulating factor 3 (granulocyte), CMPK2 - cytidine monophosphate (ump-cmp) kinase 2, mitochondrial, JUNB - jun b proto-oncogene, CXCL10 - chemokine (c-x-c motif) ligand 10, TICAM1 - toll-like receptor adaptor molecule 1, CD274 - cd274 molecule, GHSR - growth hormone secretagogue receptor, IDO1 - indoleamine 2,3-dioxygenase 1, CD180 - cd180 molecule, VCAM1 - vascular cell adhesion…
GO:0032944	regulation of mononuclear cell proliferation	3.55e-08	8.44e-06	6.38	14	[CSF1 - colony stimulating factor 1 (macrophage), CD274 - cd274 molecule, TICAM1 - toll-like receptor adaptor molecule 1, IL23A - interleukin 23, alpha subunit p19, TNFRSF4 - tumor necrosis factor receptor superfamily, member 4, VSIG4 - v-set and immunoglobulin domain containing 4, IRF1 - interferon regulatory factor 1, IDO1 - indoleamine 2,3-dioxygenase 1, ZBTB7B - zinc finger and btb domain con…
GO:0070663	regulation of leukocyte proliferation	5.48e-08	1.28e-05	6.17	14	[CSF1 - colony stimulating factor 1 (macrophage), TICAM1 - toll-like receptor adaptor molecule 1, CD274 - cd274 molecule, IL23A - interleukin 23, alpha subunit p19, TNFRSF4 - tumor necrosis factor receptor superfamily, member 4, VSIG4 - v-set and immunoglobulin domain containing 4, IRF1 - interferon regulatory factor 1, IDO1 - indoleamine 2,3-dioxygenase 1, ZBTB7B - zinc finger and btb domain con…
GO:0032481	positive regulation of type I interferon production	5.87e-08	1.35e-05	9.8	10	[TMEM173 - transmembrane protein 173, IRF1 - interferon regulatory factor 1, DHX58 - dexh (asp-glu-x-his) box polypeptide 58, IRF7 - interferon regulatory factor 7, TLR2 - toll-like receptor 2, STAT1 - signal transducer and activator of transcription 1, 91kda, TLR4 - toll-like receptor 4, DDX58 - dead (asp-glu-ala-asp) box polypeptide 58, ZBP1 - z-dna binding protein 1, TICAM1 - toll-like recepto…
GO:0010033	response to organic substance	7.27e-08	1.64e-05	2.21	46	[P2RY13 - purinergic receptor p2y, g-protein coupled, 13, IFIT2 - interferon-induced protein with tetratricopeptide repeats 2, TIMP1 - timp metallopeptidase inhibitor 1, FFAR2 - free fatty acid receptor 2, LGMN - legumain, STAT2 - signal transducer and activator of transcription 2, 113kda, STAT1 - signal transducer and activator of transcription 1, 91kda, CLEC7A - c-type lectin domain family 7, m…
GO:0008284	positive regulation of cell proliferation	7.3e-08	1.62e-05	3.27	26	[TIMP1 - timp metallopeptidase inhibitor 1, LGMN - legumain, FN1 - fibronectin 1, STAT1 - signal transducer and activator of transcription 1, 91kda, CLEC7A - c-type lectin domain family 7, member a, SPHK1 - sphingosine kinase 1, HLX - h2.0-like homeobox, TICAM1 - toll-like receptor adaptor molecule 1, CD274 - cd274 molecule, IL23A - interleukin 23, alpha subunit p19, TNFRSF4 - tumor necrosis fact…
GO:0002758	innate immune response-activating signal transduction	9.8e-08	2.15e-05	5.89	14	[FFAR2 - free fatty acid receptor 2, LGMN - legumain, PSMA5 - proteasome (prosome, macropain) subunit, alpha type, 5, PSME2 - proteasome (prosome, macropain) activator subunit 2 (pa28 beta), UNC93B1 - unc-93 homolog b1 (c. elegans), PSMB10 - proteasome (prosome, macropain) subunit, beta type, 10, PSMB9 - proteasome (prosome, macropain) subunit, beta type, 9, CLEC7A - c-type lectin domain family 7…
GO:0045069	regulation of viral genome replication	1.04e-07	2.24e-05	9.25	10	[ADAR - adenosine deaminase, rna-specific, RSAD2 - radical s-adenosyl methionine domain containing 2, IFITM3 - interferon induced transmembrane protein 3, MX1 - myxovirus (influenza virus) resistance 1, interferon-inducible protein p78 (mouse), ISG20 - interferon stimulated exonuclease gene 20kda, OAS1 - 2'-5'-oligoadenylate synthetase 1, 40/46kda, EIF2AK2 - eukaryotic translation initiation fact…
GO:0050691	regulation of defense response to virus by host	1.14e-07	2.41e-05	17.03	7	[IL23A - interleukin 23, alpha subunit p19, TMEM173 - transmembrane protein 173, DTX3L - deltex 3-like (drosophila), IL27 - interleukin 27, PARP9 - poly (adp-ribose) polymerase family, member 9, STAT1 - signal transducer and activator of transcription 1, 91kda, DDX58 - dead (asp-glu-ala-asp) box polypeptide 58]
GO:0010647	positive regulation of cell communication	1.57e-07	3.29e-05	2.34	40	[DHX58 - dexh (asp-glu-x-his) box polypeptide 58, LGMN - legumain, PSME2 - proteasome (prosome, macropain) activator subunit 2 (pa28 beta), DDX60 - dead (asp-glu-ala-asp) box polypeptide 60, SPHK1 - sphingosine kinase 1, TICAM1 - toll-like receptor adaptor molecule 1, CCR1 - chemokine (c-c motif) receptor 1, TMEM106A - transmembrane protein 106a, IL23A - interleukin 23, alpha subunit p19, ZBTB7B …
GO:0071216	cellular response to biotic stimulus	1.77e-07	3.64e-05	6.14	13	[CSF3 - colony stimulating factor 3 (granulocyte), CMPK2 - cytidine monophosphate (ump-cmp) kinase 2, mitochondrial, CLEC7A - c-type lectin domain family 7, member a, CXCL10 - chemokine (c-x-c motif) ligand 10, TICAM1 - toll-like receptor adaptor molecule 1, CD274 - cd274 molecule, GHSR - growth hormone secretagogue receptor, TLR2 - toll-like receptor 2, CD180 - cd180 molecule, TLR4 - toll-like r…
GO:0023056	positive regulation of signaling	1.82e-07	3.69e-05	2.33	40	[DHX58 - dexh (asp-glu-x-his) box polypeptide 58, LGMN - legumain, PSME2 - proteasome (prosome, macropain) activator subunit 2 (pa28 beta), DDX60 - dead (asp-glu-ala-asp) box polypeptide 60, SPHK1 - sphingosine kinase 1, TICAM1 - toll-like receptor adaptor molecule 1, CCR1 - chemokine (c-c motif) receptor 1, TMEM106A - transmembrane protein 106a, IL23A - interleukin 23, alpha subunit p19, ZBTB7B …
GO:0071219	cellular response to molecule of bacterial origin	1.95e-07	3.9e-05	6.74	12	[GHSR - growth hormone secretagogue receptor, CSF3 - colony stimulating factor 3 (granulocyte), CMPK2 - cytidine monophosphate (ump-cmp) kinase 2, mitochondrial, CD180 - cd180 molecule, TLR2 - toll-like receptor 2, TLR4 - toll-like receptor 4, CXCL10 - chemokine (c-x-c motif) ligand 10, CD86 - cd86 molecule, CASP1 - caspase 1, apoptosis-related cysteine peptidase, IL6 - interleukin 6 (interferon,…
GO:0050707	regulation of cytokine secretion	2.35e-07	4.63e-05	6.62	12	[TNFRSF4 - tumor necrosis factor receptor superfamily, member 4, GHSR - growth hormone secretagogue receptor, FFAR2 - free fatty acid receptor 2, NLRP12 - nlr family, pyrin domain containing 12, FN1 - fibronectin 1, PML - promyelocytic leukemia, TLR2 - toll-like receptor 2, TLR4 - toll-like receptor 4, DDX58 - dead (asp-glu-ala-asp) box polypeptide 58, IL1RAP - interleukin 1 receptor accessory pr…
GO:0050670	regulation of lymphocyte proliferation	2.47e-07	4.8e-05	5.97	13	[TICAM1 - toll-like receptor adaptor molecule 1, CD274 - cd274 molecule, IL23A - interleukin 23, alpha subunit p19, TNFRSF4 - tumor necrosis factor receptor superfamily, member 4, VSIG4 - v-set and immunoglobulin domain containing 4, IRF1 - interferon regulatory factor 1, IDO1 - indoleamine 2,3-dioxygenase 1, ZBTB7B - zinc finger and btb domain containing 7b, VCAM1 - vascular cell adhesion molecu…
GO:0009967	positive regulation of signal transduction	2.6e-07	4.97e-05	2.37	38	[DHX58 - dexh (asp-glu-x-his) box polypeptide 58, PSME2 - proteasome (prosome, macropain) activator subunit 2 (pa28 beta), DDX60 - dead (asp-glu-ala-asp) box polypeptide 60, SPHK1 - sphingosine kinase 1, TICAM1 - toll-like receptor adaptor molecule 1, CCR1 - chemokine (c-c motif) receptor 1, TMEM106A - transmembrane protein 106a, IL23A - interleukin 23, alpha subunit p19, ZBTB7B - zinc finger and…
GO:0001959	regulation of cytokine-mediated signaling pathway	2.83e-07	5.34e-05	6.51	12	[ADAR - adenosine deaminase, rna-specific, CSF1 - colony stimulating factor 1 (macrophage), SOCS3 - suppressor of cytokine signaling 3, IRF7 - interferon regulatory factor 7, USP18 - ubiquitin specific peptidase 18, PARP14 - poly (adp-ribose) polymerase family, member 14, PARP9 - poly (adp-ribose) polymerase family, member 9, STAT1 - signal transducer and activator of transcription 1, 91kda, ZBP1…
GO:0002218	activation of innate immune response	2.86e-07	5.33e-05	5.41	14	[FFAR2 - free fatty acid receptor 2, LGMN - legumain, PSMA5 - proteasome (prosome, macropain) subunit, alpha type, 5, PSME2 - proteasome (prosome, macropain) activator subunit 2 (pa28 beta), UNC93B1 - unc-93 homolog b1 (c. elegans), PSMB10 - proteasome (prosome, macropain) subunit, beta type, 10, PSMB9 - proteasome (prosome, macropain) subunit, beta type, 9, CLEC7A - c-type lectin domain family 7…
GO:0002253	activation of immune response	3.14e-07	5.78e-05	3.94	19	[FFAR2 - free fatty acid receptor 2, LGMN - legumain, PSMA5 - proteasome (prosome, macropain) subunit, alpha type, 5, PSME2 - proteasome (prosome, macropain) activator subunit 2 (pa28 beta), CMKLR1 - chemokine-like receptor 1, UNC93B1 - unc-93 homolog b1 (c. elegans), SERPING1 - serpin peptidase inhibitor, clade g (c1 inhibitor), member 1, PSMB10 - proteasome (prosome, macropain) subunit, beta ty…
GO:0002699	positive regulation of immune effector process	3.15e-07	5.71e-05	5.85	13	[RSAD2 - radical s-adenosyl methionine domain containing 2, FFAR2 - free fatty acid receptor 2, DHX58 - dexh (asp-glu-x-his) box polypeptide 58, DDX60 - dead (asp-glu-ala-asp) box polypeptide 60, TICAM1 - toll-like receptor adaptor molecule 1, HLX - h2.0-like homeobox, IL23A - interleukin 23, alpha subunit p19, TNFRSF4 - tumor necrosis factor receptor superfamily, member 4, TLR4 - toll-like recep…
GO:0042035	regulation of cytokine biosynthetic process	3.29e-07	5.9e-05	8.21	10	[GHSR - growth hormone secretagogue receptor, NLRP12 - nlr family, pyrin domain containing 12, IRF1 - interferon regulatory factor 1, IL27 - interleukin 27, NMI - n-myc (and stat) interactor, TLR4 - toll-like receptor 4, CLEC7A - c-type lectin domain family 7, member a, CD86 - cd86 molecule, IL6 - interleukin 6 (interferon, beta 2), TICAM1 - toll-like receptor adaptor molecule 1]
GO:0050792	regulation of viral process	4.31e-07	7.62e-05	5.69	13	[RSAD2 - radical s-adenosyl methionine domain containing 2, IFITM3 - interferon induced transmembrane protein 3, ISG20 - interferon stimulated exonuclease gene 20kda, STAT1 - signal transducer and activator of transcription 1, 91kda, TRIM21 - tripartite motif containing 21, PLSCR1 - phospholipid scramblase 1, ADAR - adenosine deaminase, rna-specific, PML - promyelocytic leukemia, MX1 - myxovirus …
GO:0071222	cellular response to lipopolysaccharide	7.57e-07	0.000132	6.63	11	[GHSR - growth hormone secretagogue receptor, CSF3 - colony stimulating factor 3 (granulocyte), CMPK2 - cytidine monophosphate (ump-cmp) kinase 2, mitochondrial, CD180 - cd180 molecule, TLR4 - toll-like receptor 4, CXCL10 - chemokine (c-x-c motif) ligand 10, CD86 - cd86 molecule, CASP1 - caspase 1, apoptosis-related cysteine peptidase, IL6 - interleukin 6 (interferon, beta 2), CD274 - cd274 molec…
GO:0002221	pattern recognition receptor signaling pathway	8.14e-07	0.00014	7.46	10	[FFAR2 - free fatty acid receptor 2, TMEM173 - transmembrane protein 173, LGMN - legumain, IRF7 - interferon regulatory factor 7, TLR2 - toll-like receptor 2, UNC93B1 - unc-93 homolog b1 (c. elegans), TLR4 - toll-like receptor 4, CLEC7A - c-type lectin domain family 7, member a, DDX58 - dead (asp-glu-ala-asp) box polypeptide 58, TICAM1 - toll-like receptor adaptor molecule 1]
GO:0050729	positive regulation of inflammatory response	8.14e-07	0.000139	7.46	10	[IL23A - interleukin 23, alpha subunit p19, FFAR2 - free fatty acid receptor 2, NLRP12 - nlr family, pyrin domain containing 12, IDO1 - indoleamine 2,3-dioxygenase 1, TLR2 - toll-like receptor 2, PTGS2 - prostaglandin-endoperoxide synthase 2 (prostaglandin g/h synthase and cyclooxygenase), TLR4 - toll-like receptor 4, CLEC7A - c-type lectin domain family 7, member a, IL6 - interleukin 6 (interfer…
GO:0043903	regulation of symbiosis, encompassing mutualism through parasitism	9.06e-07	0.000152	5.34	13	[RSAD2 - radical s-adenosyl methionine domain containing 2, IFITM3 - interferon induced transmembrane protein 3, ISG20 - interferon stimulated exonuclease gene 20kda, STAT1 - signal transducer and activator of transcription 1, 91kda, TRIM21 - tripartite motif containing 21, PLSCR1 - phospholipid scramblase 1, ADAR - adenosine deaminase, rna-specific, PML - promyelocytic leukemia, MX1 - myxovirus …
GO:1903706	regulation of hemopoiesis	1.05e-06	0.000174	3.64	19	[CSF1 - colony stimulating factor 1 (macrophage), CSF3 - colony stimulating factor 3 (granulocyte), PSMA5 - proteasome (prosome, macropain) subunit, alpha type, 5, PSME2 - proteasome (prosome, macropain) activator subunit 2 (pa28 beta), PSMB10 - proteasome (prosome, macropain) subunit, beta type, 10, STAT1 - signal transducer and activator of transcription 1, 91kda, PSMB9 - proteasome (prosome, m…
GO:0042127	regulation of cell proliferation	1.1e-06	0.000181	2.39	34	[TIMP1 - timp metallopeptidase inhibitor 1, LGMN - legumain, FN1 - fibronectin 1, STAT2 - signal transducer and activator of transcription 2, 113kda, STAT1 - signal transducer and activator of transcription 1, 91kda, CLEC7A - c-type lectin domain family 7, member a, SPHK1 - sphingosine kinase 1, HLX - h2.0-like homeobox, TICAM1 - toll-like receptor adaptor molecule 1, CD274 - cd274 molecule, TNFR…
GO:0032722	positive regulation of chemokine production	1.16e-06	0.000188	12.42	7	[FFAR2 - free fatty acid receptor 2, TLR2 - toll-like receptor 2, TLR4 - toll-like receptor 4, CLEC7A - c-type lectin domain family 7, member a, EIF2AK2 - eukaryotic translation initiation factor 2-alpha kinase 2, IL6 - interleukin 6 (interferon, beta 2), TICAM1 - toll-like receptor adaptor molecule 1]
GO:0001775	cell activation	1.47e-06	0.000236	2.66	28	[NEU1 - sialidase 1 (lysosomal sialidase), TIMP1 - timp metallopeptidase inhibitor 1, CLEC7A - c-type lectin domain family 7, member a, TICAM1 - toll-like receptor adaptor molecule 1, TNFRSF4 - tumor necrosis factor receptor superfamily, member 4, IL23A - interleukin 23, alpha subunit p19, TMEM106A - transmembrane protein 106a, TMEM173 - transmembrane protein 173, ZBTB7B - zinc finger and btb dom…
GO:0050900	leukocyte migration	1.92e-06	0.000305	4.99	13	[FFAR2 - free fatty acid receptor 2, FN1 - fibronectin 1, PTPRO - protein tyrosine phosphatase, receptor type, o, GPR15 - g protein-coupled receptor 15, CXCL10 - chemokine (c-x-c motif) ligand 10, CSF3R - colony stimulating factor 3 receptor (granulocyte), TREM1 - triggering receptor expressed on myeloid cells 1, CCR1 - chemokine (c-c motif) receptor 1, NLRP12 - nlr family, pyrin domain containin…
GO:0035455	response to interferon-alpha	2.04e-06	0.000319	21.89	5	[ADAR - adenosine deaminase, rna-specific, IFIT2 - interferon-induced protein with tetratricopeptide repeats 2, IFITM3 - interferon induced transmembrane protein 3, MX2 - myxovirus (influenza virus) resistance 2 (mouse), EIF2AK2 - eukaryotic translation initiation factor 2-alpha kinase 2]
GO:0002694	regulation of leukocyte activation	2.34e-06	0.000362	3.45	19	[CLEC7A - c-type lectin domain family 7, member a, SPHK1 - sphingosine kinase 1, CD274 - cd274 molecule, TICAM1 - toll-like receptor adaptor molecule 1, PLSCR1 - phospholipid scramblase 1, HLX - h2.0-like homeobox, IL23A - interleukin 23, alpha subunit p19, TNFRSF4 - tumor necrosis factor receptor superfamily, member 4, VSIG4 - v-set and immunoglobulin domain containing 4, IRF1 - interferon regul…
GO:0051090	regulation of DNA-binding transcription factor activity	2.36e-06	0.000362	3.78	17	[CSF3 - colony stimulating factor 3 (granulocyte), CMKLR1 - chemokine-like receptor 1, TRIM21 - tripartite motif containing 21, IL1RAP - interleukin 1 receptor accessory protein, SPHK1 - sphingosine kinase 1, TICAM1 - toll-like receptor adaptor molecule 1, NFKBIE - nuclear factor of kappa light polypeptide gene enhancer in b-cells inhibitor, epsilon, TNFRSF4 - tumor necrosis factor receptor super…
GO:0032728	positive regulation of interferon-beta production	2.57e-06	0.000389	14.59	6	[IRF1 - interferon regulatory factor 1, IRF7 - interferon regulatory factor 7, TLR2 - toll-like receptor 2, TLR4 - toll-like receptor 4, DDX58 - dead (asp-glu-ala-asp) box polypeptide 58, TICAM1 - toll-like receptor adaptor molecule 1]
GO:0071310	cellular response to organic substance	2.78e-06	0.000416	2.38	32	[P2RY13 - purinergic receptor p2y, g-protein coupled, 13, IFIT2 - interferon-induced protein with tetratricopeptide repeats 2, FFAR2 - free fatty acid receptor 2, LGMN - legumain, STAT1 - signal transducer and activator of transcription 1, 91kda, JUNB - jun b proto-oncogene, SPHK1 - sphingosine kinase 1, CD274 - cd274 molecule, TICAM1 - toll-like receptor adaptor molecule 1, TMEM173 - transmembra…
GO:0032648	regulation of interferon-beta production	2.85e-06	0.000423	10.95	7	[IRF1 - interferon regulatory factor 1, IRF7 - interferon regulatory factor 7, TLR2 - toll-like receptor 2, TLR4 - toll-like receptor 4, NMI - n-myc (and stat) interactor, DDX58 - dead (asp-glu-ala-asp) box polypeptide 58, TICAM1 - toll-like receptor adaptor molecule 1]
GO:0048522	positive regulation of cellular process	2.96e-06	0.000434	1.54	78	[ARID3A - at rich interactive domain 3a (bright-like), IFIT2 - interferon-induced protein with tetratricopeptide repeats 2, TIMP1 - timp metallopeptidase inhibitor 1, DHX58 - dexh (asp-glu-x-his) box polypeptide 58, LGMN - legumain, FN1 - fibronectin 1, DTX3L - deltex 3-like (drosophila), DDX60 - dead (asp-glu-ala-asp) box polypeptide 60, HLX - h2.0-like homeobox, TICAM1 - toll-like receptor adap…
GO:0051246	regulation of protein metabolic process	3.27e-06	0.000475	1.85	51	[TIMP1 - timp metallopeptidase inhibitor 1, LGMN - legumain, FN1 - fibronectin 1, DTX3L - deltex 3-like (drosophila), TICAM1 - toll-like receptor adaptor molecule 1, TMEM106A - transmembrane protein 106a, IL23A - interleukin 23, alpha subunit p19, PML - promyelocytic leukemia, SPI1 - spleen focus forming virus (sffv) proviral integration oncogene, TLR4 - toll-like receptor 4, NMI - n-myc (and sta…
GO:0065009	regulation of molecular function	3.42e-06	0.000492	1.83	52	[IFIT2 - interferon-induced protein with tetratricopeptide repeats 2, TIMP1 - timp metallopeptidase inhibitor 1, LGMN - legumain, FN1 - fibronectin 1, DTX3L - deltex 3-like (drosophila), TICAM1 - toll-like receptor adaptor molecule 1, IL23A - interleukin 23, alpha subunit p19, TMEM173 - transmembrane protein 173, PML - promyelocytic leukemia, TLR2 - toll-like receptor 2, TLR4 - toll-like receptor…
GO:0009966	regulation of signal transduction	3.44e-06	0.00049	1.8	54	[TIMP1 - timp metallopeptidase inhibitor 1, DHX58 - dexh (asp-glu-x-his) box polypeptide 58, LGMN - legumain, USP18 - ubiquitin specific peptidase 18, FN1 - fibronectin 1, DDX60 - dead (asp-glu-ala-asp) box polypeptide 60, PTPRO - protein tyrosine phosphatase, receptor type, o, TICAM1 - toll-like receptor adaptor molecule 1, TMEM106A - transmembrane protein 106a, IL23A - interleukin 23, alpha sub…
GO:1903974	positive regulation of cellular response to macrophage colony-stimulating factor stimulus	3.46e-06	0.000487	65.67	3	[CSF1 - colony stimulating factor 1 (macrophage), TLR2 - toll-like receptor 2, TLR4 - toll-like receptor 4]
GO:1903971	positive regulation of response to macrophage colony-stimulating factor	3.46e-06	0.000482	65.67	3	[CSF1 - colony stimulating factor 1 (macrophage), TLR2 - toll-like receptor 2, TLR4 - toll-like receptor 4]
GO:0032655	regulation of interleukin-12 production	3.95e-06	0.000545	10.45	7	[IL23A - interleukin 23, alpha subunit p19, IRF1 - interferon regulatory factor 1, IDO1 - indoleamine 2,3-dioxygenase 1, CMKLR1 - chemokine-like receptor 1, TLR2 - toll-like receptor 2, TLR4 - toll-like receptor 4, CLEC7A - c-type lectin domain family 7, member a]
GO:0032735	positive regulation of interleukin-12 production	4.02e-06	0.000548	13.59	6	[IL23A - interleukin 23, alpha subunit p19, IRF1 - interferon regulatory factor 1, IDO1 - indoleamine 2,3-dioxygenase 1, TLR2 - toll-like receptor 2, TLR4 - toll-like receptor 4, CLEC7A - c-type lectin domain family 7, member a]
GO:0042129	regulation of T cell proliferation	4.95e-06	0.000669	6.14	10	[IL23A - interleukin 23, alpha subunit p19, VSIG4 - v-set and immunoglobulin domain containing 4, IRF1 - interferon regulatory factor 1, IDO1 - indoleamine 2,3-dioxygenase 1, ZBTB7B - zinc finger and btb domain containing 7b, IL27 - interleukin 27, VCAM1 - vascular cell adhesion molecule 1, CD86 - cd86 molecule, IL6 - interleukin 6 (interferon, beta 2), CD274 - cd274 molecule]
GO:0035456	response to interferon-beta	5.6e-06	0.000749	18.24	5	[TMEM173 - transmembrane protein 173, IFITM3 - interferon induced transmembrane protein 3, IRF1 - interferon regulatory factor 1, STAT1 - signal transducer and activator of transcription 1, 91kda, PLSCR1 - phospholipid scramblase 1]
GO:0031348	negative regulation of defense response	5.86e-06	0.000777	5.39	11	[ADAR - adenosine deaminase, rna-specific, GHSR - growth hormone secretagogue receptor, VSIG4 - v-set and immunoglobulin domain containing 4, NLRP12 - nlr family, pyrin domain containing 12, DHX58 - dexh (asp-glu-x-his) box polypeptide 58, SOCS3 - suppressor of cytokine signaling 3, TNFAIP6 - tumor necrosis factor, alpha-induced protein 6, PARP14 - poly (adp-ribose) polymerase family, member 14, …
GO:0048518	positive regulation of biological process	6.09e-06	0.000799	1.48	83	[ARID3A - at rich interactive domain 3a (bright-like), IFIT2 - interferon-induced protein with tetratricopeptide repeats 2, TIMP1 - timp metallopeptidase inhibitor 1, DHX58 - dexh (asp-glu-x-his) box polypeptide 58, LGMN - legumain, FN1 - fibronectin 1, DTX3L - deltex 3-like (drosophila), UNC93B1 - unc-93 homolog b1 (c. elegans), DDX60 - dead (asp-glu-ala-asp) box polypeptide 60, HLX - h2.0-like …
GO:0050865	regulation of cell activation	6.2e-06	0.000807	3.22	19	[CLEC7A - c-type lectin domain family 7, member a, SPHK1 - sphingosine kinase 1, PLSCR1 - phospholipid scramblase 1, TICAM1 - toll-like receptor adaptor molecule 1, CD274 - cd274 molecule, HLX - h2.0-like homeobox, IL23A - interleukin 23, alpha subunit p19, TNFRSF4 - tumor necrosis factor receptor superfamily, member 4, VSIG4 - v-set and immunoglobulin domain containing 4, IRF1 - interferon regul…
GO:0002757	immune response-activating signal transduction	6.37e-06	0.000822	3.7	16	[FFAR2 - free fatty acid receptor 2, LGMN - legumain, PSMA5 - proteasome (prosome, macropain) subunit, alpha type, 5, PSME2 - proteasome (prosome, macropain) activator subunit 2 (pa28 beta), CMKLR1 - chemokine-like receptor 1, UNC93B1 - unc-93 homolog b1 (c. elegans), PSMB10 - proteasome (prosome, macropain) subunit, beta type, 10, PSMB9 - proteasome (prosome, macropain) subunit, beta type, 9, CL…
GO:0001816	cytokine production	7.33e-06	0.000936	7.84	8	[MR1 - major histocompatibility complex, class i-related, TMEM173 - transmembrane protein 173, CCM2L - cerebral cavernous malformation 2-like, IRF7 - interferon regulatory factor 7, IDO1 - indoleamine 2,3-dioxygenase 1, TLR2 - toll-like receptor 2, PTGS2 - prostaglandin-endoperoxide synthase 2 (prostaglandin g/h synthase and cyclooxygenase), TLR4 - toll-like receptor 4]
GO:0002702	positive regulation of production of molecular mediator of immune response	8.2e-06	0.00104	7.73	8	[TNFRSF4 - tumor necrosis factor receptor superfamily, member 4, RSAD2 - radical s-adenosyl methionine domain containing 2, FFAR2 - free fatty acid receptor 2, TLR4 - toll-like receptor 4, DDX58 - dead (asp-glu-ala-asp) box polypeptide 58, MAD2L2 - mad2 mitotic arrest deficient-like 2 (yeast), IL6 - interleukin 6 (interferon, beta 2), TICAM1 - toll-like receptor adaptor molecule 1]
GO:0032642	regulation of chemokine production	8.31e-06	0.00104	9.38	7	[FFAR2 - free fatty acid receptor 2, TLR2 - toll-like receptor 2, TLR4 - toll-like receptor 4, CLEC7A - c-type lectin domain family 7, member a, EIF2AK2 - eukaryotic translation initiation factor 2-alpha kinase 2, IL6 - interleukin 6 (interferon, beta 2), TICAM1 - toll-like receptor adaptor molecule 1]
GO:0032946	positive regulation of mononuclear cell proliferation	8.58e-06	0.00107	6.57	9	[TNFRSF4 - tumor necrosis factor receptor superfamily, member 4, IL23A - interleukin 23, alpha subunit p19, CSF1 - colony stimulating factor 1 (macrophage), VCAM1 - vascular cell adhesion molecule 1, TLR4 - toll-like receptor 4, CD86 - cd86 molecule, IL6 - interleukin 6 (interferon, beta 2), TICAM1 - toll-like receptor adaptor molecule 1, CD274 - cd274 molecule]
GO:0032675	regulation of interleukin-6 production	8.58e-06	0.00106	6.57	9	[GHSR - growth hormone secretagogue receptor, NLRP12 - nlr family, pyrin domain containing 12, TLR2 - toll-like receptor 2, TLR4 - toll-like receptor 4, CLEC7A - c-type lectin domain family 7, member a, DDX58 - dead (asp-glu-ala-asp) box polypeptide 58, IL1RAP - interleukin 1 receptor accessory protein, IL6 - interleukin 6 (interferon, beta 2), TICAM1 - toll-like receptor adaptor molecule 1]
GO:0002819	regulation of adaptive immune response	1.1e-05	0.00135	5.61	10	[IL23A - interleukin 23, alpha subunit p19, RSAD2 - radical s-adenosyl methionine domain containing 2, IRF1 - interferon regulatory factor 1, IRF7 - interferon regulatory factor 7, ZBTB7B - zinc finger and btb domain containing 7b, IL27 - interleukin 27, MAD2L2 - mad2 mitotic arrest deficient-like 2 (yeast), HLX - h2.0-like homeobox, IL6 - interleukin 6 (interferon, beta 2), CD274 - cd274 molecul…
GO:0070665	positive regulation of leukocyte proliferation	1.12e-05	0.00136	6.36	9	[TNFRSF4 - tumor necrosis factor receptor superfamily, member 4, IL23A - interleukin 23, alpha subunit p19, CSF1 - colony stimulating factor 1 (macrophage), VCAM1 - vascular cell adhesion molecule 1, TLR4 - toll-like receptor 4, CD86 - cd86 molecule, IL6 - interleukin 6 (interferon, beta 2), CD274 - cd274 molecule, TICAM1 - toll-like receptor adaptor molecule 1]
GO:0042221	response to chemical	1.13e-05	0.00136	1.84	47	[P2RY13 - purinergic receptor p2y, g-protein coupled, 13, IFIT2 - interferon-induced protein with tetratricopeptide repeats 2, FFAR2 - free fatty acid receptor 2, TIMP1 - timp metallopeptidase inhibitor 1, LGMN - legumain, STAT2 - signal transducer and activator of transcription 2, 113kda, STAT1 - signal transducer and activator of transcription 1, 91kda, CLEC7A - c-type lectin domain family 7, m…
GO:0042108	positive regulation of cytokine biosynthetic process	1.25e-05	0.00148	8.84	7	[IRF1 - interferon regulatory factor 1, IL27 - interleukin 27, TLR4 - toll-like receptor 4, CLEC7A - c-type lectin domain family 7, member a, CD86 - cd86 molecule, IL6 - interleukin 6 (interferon, beta 2), TICAM1 - toll-like receptor adaptor molecule 1]
GO:0051247	positive regulation of protein metabolic process	1.3e-05	0.00153	2.11	35	[LGMN - legumain, FN1 - fibronectin 1, PSME2 - proteasome (prosome, macropain) activator subunit 2 (pa28 beta), CLEC7A - c-type lectin domain family 7, member a, SPHK1 - sphingosine kinase 1, TICAM1 - toll-like receptor adaptor molecule 1, CCR1 - chemokine (c-c motif) receptor 1, TMEM106A - transmembrane protein 106a, IL23A - interleukin 23, alpha subunit p19, ARRDC4 - arrestin domain containing …
GO:0010646	regulation of cell communication	1.34e-05	0.00156	1.7	56	[TIMP1 - timp metallopeptidase inhibitor 1, DHX58 - dexh (asp-glu-x-his) box polypeptide 58, LGMN - legumain, USP18 - ubiquitin specific peptidase 18, FN1 - fibronectin 1, DDX60 - dead (asp-glu-ala-asp) box polypeptide 60, PTPRO - protein tyrosine phosphatase, receptor type, o, TICAM1 - toll-like receptor adaptor molecule 1, TMEM106A - transmembrane protein 106a, IL23A - interleukin 23, alpha sub…
GO:0002690	positive regulation of leukocyte chemotaxis	1.42e-05	0.00164	8.67	7	[IL23A - interleukin 23, alpha subunit p19, CSF1 - colony stimulating factor 1 (macrophage), LGMN - legumain, CMKLR1 - chemokine-like receptor 1, CXCL10 - chemokine (c-x-c motif) ligand 10, CCR1 - chemokine (c-c motif) receptor 1, IL6 - interleukin 6 (interferon, beta 2)]
GO:0032653	regulation of interleukin-10 production	1.51e-05	0.00173	10.95	6	[IL23A - interleukin 23, alpha subunit p19, IDO1 - indoleamine 2,3-dioxygenase 1, TLR2 - toll-like receptor 2, TLR4 - toll-like receptor 4, CLEC7A - c-type lectin domain family 7, member a, CD274 - cd274 molecule]
GO:0002764	immune response-regulating signaling pathway	1.63e-05	0.00186	3.43	16	[FFAR2 - free fatty acid receptor 2, LGMN - legumain, PSMA5 - proteasome (prosome, macropain) subunit, alpha type, 5, PSME2 - proteasome (prosome, macropain) activator subunit 2 (pa28 beta), CMKLR1 - chemokine-like receptor 1, UNC93B1 - unc-93 homolog b1 (c. elegans), PSMB10 - proteasome (prosome, macropain) subunit, beta type, 10, PSMB9 - proteasome (prosome, macropain) subunit, beta type, 9, CL…
GO:0032647	regulation of interferon-alpha production	1.64e-05	0.00185	14.93	5	[IRF7 - interferon regulatory factor 7, TLR4 - toll-like receptor 4, NMI - n-myc (and stat) interactor, STAT1 - signal transducer and activator of transcription 1, 91kda, DDX58 - dead (asp-glu-ala-asp) box polypeptide 58]
GO:0098586	cellular response to virus	1.64e-05	0.00184	14.93	5	[ADAR - adenosine deaminase, rna-specific, TMEM173 - transmembrane protein 173, IRF7 - interferon regulatory factor 7, DDX58 - dead (asp-glu-ala-asp) box polypeptide 58, IFI6 - interferon, alpha-inducible protein 6]
GO:0051249	regulation of lymphocyte activation	1.77e-05	0.00196	3.41	16	[CLEC7A - c-type lectin domain family 7, member a, CD274 - cd274 molecule, TICAM1 - toll-like receptor adaptor molecule 1, HLX - h2.0-like homeobox, TNFRSF4 - tumor necrosis factor receptor superfamily, member 4, IL23A - interleukin 23, alpha subunit p19, VSIG4 - v-set and immunoglobulin domain containing 4, IRF1 - interferon regulatory factor 1, IDO1 - indoleamine 2,3-dioxygenase 1, ZBTB7B - zin…
GO:0050708	regulation of protein secretion	1.77e-05	0.00196	3.6	15	[RSAD2 - radical s-adenosyl methionine domain containing 2, FFAR2 - free fatty acid receptor 2, FN1 - fibronectin 1, IL1RAP - interleukin 1 receptor accessory protein, CD274 - cd274 molecule, GHSR - growth hormone secretagogue receptor, TNFRSF4 - tumor necrosis factor receptor superfamily, member 4, GOLPH3L - golgi phosphoprotein 3-like, NLRP12 - nlr family, pyrin domain containing 12, PML - prom…
GO:0001961	positive regulation of cytokine-mediated signaling pathway	1.78e-05	0.00195	10.65	6	[CSF1 - colony stimulating factor 1 (macrophage), IRF7 - interferon regulatory factor 7, PARP14 - poly (adp-ribose) polymerase family, member 14, PARP9 - poly (adp-ribose) polymerase family, member 9, ZBP1 - z-dna binding protein 1, CASP1 - caspase 1, apoptosis-related cysteine peptidase]
GO:0045824	negative regulation of innate immune response	1.78e-05	0.00193	10.65	6	[ADAR - adenosine deaminase, rna-specific, VSIG4 - v-set and immunoglobulin domain containing 4, DHX58 - dexh (asp-glu-x-his) box polypeptide 58, PARP14 - poly (adp-ribose) polymerase family, member 14, SERPING1 - serpin peptidase inhibitor, clade g (c1 inhibitor), member 1, NMI - n-myc (and stat) interactor]
GO:0045321	leukocyte activation	1.82e-05	0.00196	2.56	24	[NEU1 - sialidase 1 (lysosomal sialidase), CSF1 - colony stimulating factor 1 (macrophage), RSAD2 - radical s-adenosyl methionine domain containing 2, PSMA5 - proteasome (prosome, macropain) subunit, alpha type, 5, HK3 - hexokinase 3 (white cell), PSMB10 - proteasome (prosome, macropain) subunit, beta type, 10, CLEC7A - c-type lectin domain family 7, member a, TICAM1 - toll-like receptor adaptor …
GO:0023051	regulation of signaling	1.82e-05	0.00195	1.68	56	[TIMP1 - timp metallopeptidase inhibitor 1, DHX58 - dexh (asp-glu-x-his) box polypeptide 58, LGMN - legumain, USP18 - ubiquitin specific peptidase 18, FN1 - fibronectin 1, DDX60 - dead (asp-glu-ala-asp) box polypeptide 60, PTPRO - protein tyrosine phosphatase, receptor type, o, TICAM1 - toll-like receptor adaptor molecule 1, TMEM106A - transmembrane protein 106a, IL23A - interleukin 23, alpha sub…
GO:0051091	positive regulation of DNA-binding transcription factor activity	1.86e-05	0.00197	4.38	12	[TMEM173 - transmembrane protein 173, CSF3 - colony stimulating factor 3 (granulocyte), TLR2 - toll-like receptor 2, TLR4 - toll-like receptor 4, TRIM21 - tripartite motif containing 21, EIF2AK2 - eukaryotic translation initiation factor 2-alpha kinase 2, DDX58 - dead (asp-glu-ala-asp) box polypeptide 58, IL1RAP - interleukin 1 receptor accessory protein, SPHK1 - sphingosine kinase 1, TRIM22 - tr…
GO:0052547	regulation of peptidase activity	2.03e-05	0.00214	3.77	14	[TIMP1 - timp metallopeptidase inhibitor 1, LGMN - legumain, FN1 - fibronectin 1, PSME2 - proteasome (prosome, macropain) activator subunit 2 (pa28 beta), SERPING1 - serpin peptidase inhibitor, clade g (c1 inhibitor), member 1, PSMB9 - proteasome (prosome, macropain) subunit, beta type, 9, CLEC7A - c-type lectin domain family 7, member a, PLAUR - plasminogen activator, urokinase receptor, NLRP12 …
GO:0032755	positive regulation of interleukin-6 production	2.05e-05	0.00214	8.21	7	[TLR2 - toll-like receptor 2, TLR4 - toll-like receptor 4, CLEC7A - c-type lectin domain family 7, member a, DDX58 - dead (asp-glu-ala-asp) box polypeptide 58, IL1RAP - interleukin 1 receptor accessory protein, IL6 - interleukin 6 (interferon, beta 2), TICAM1 - toll-like receptor adaptor molecule 1]
GO:0050714	positive regulation of protein secretion	2.07e-05	0.00215	4.72	11	[TNFRSF4 - tumor necrosis factor receptor superfamily, member 4, FFAR2 - free fatty acid receptor 2, GOLPH3L - golgi phosphoprotein 3-like, NLRP12 - nlr family, pyrin domain containing 12, TLR2 - toll-like receptor 2, TLR4 - toll-like receptor 4, DDX58 - dead (asp-glu-ala-asp) box polypeptide 58, IL1RAP - interleukin 1 receptor accessory protein, CASP1 - caspase 1, apoptosis-related cysteine pept…
GO:0048519	negative regulation of biological process	2.08e-05	0.00214	1.5	74	[ARID3A - at rich interactive domain 3a (bright-like), TIMP1 - timp metallopeptidase inhibitor 1, DHX58 - dexh (asp-glu-x-his) box polypeptide 58, LGMN - legumain, FN1 - fibronectin 1, DTX3L - deltex 3-like (drosophila), PTPRO - protein tyrosine phosphatase, receptor type, o, HLX - h2.0-like homeobox, TICAM1 - toll-like receptor adaptor molecule 1, CD274 - cd274 molecule, IL23A - interleukin 23, …
GO:0050715	positive regulation of cytokine secretion	2.29e-05	0.00234	6.74	8	[FFAR2 - free fatty acid receptor 2, NLRP12 - nlr family, pyrin domain containing 12, TLR2 - toll-like receptor 2, TLR4 - toll-like receptor 4, DDX58 - dead (asp-glu-ala-asp) box polypeptide 58, IL1RAP - interleukin 1 receptor accessory protein, CASP1 - caspase 1, apoptosis-related cysteine peptidase, CD274 - cd274 molecule]
GO:1902533	positive regulation of intracellular signal transduction	2.3e-05	0.00233	2.46	25	[DHX58 - dexh (asp-glu-x-his) box polypeptide 58, DDX60 - dead (asp-glu-ala-asp) box polypeptide 60, SPHK1 - sphingosine kinase 1, TICAM1 - toll-like receptor adaptor molecule 1, CCR1 - chemokine (c-c motif) receptor 1, IL23A - interleukin 23, alpha subunit p19, TMEM106A - transmembrane protein 106a, TLR2 - toll-like receptor 2, PARP9 - poly (adp-ribose) polymerase family, member 9, TLR4 - toll-l…
GO:0032733	positive regulation of interleukin-10 production	2.58e-05	0.0026	13.68	5	[IL23A - interleukin 23, alpha subunit p19, TLR2 - toll-like receptor 2, TLR4 - toll-like receptor 4, CLEC7A - c-type lectin domain family 7, member a, CD274 - cd274 molecule]
GO:0009617	response to bacterium	2.78e-05	0.00278	5.05	10	[IL23A - interleukin 23, alpha subunit p19, MR1 - major histocompatibility complex, class i-related, DHX58 - dexh (asp-glu-x-his) box polypeptide 58, TLR2 - toll-like receptor 2, IL27 - interleukin 27, TLR4 - toll-like receptor 4, IFI44 - interferon-induced protein 44, OAS2 - 2'-5'-oligoadenylate synthetase 2, 69/71kda, GBP2 - guanylate binding protein 2, interferon-inducible, IL6 - interleukin 6…
GO:0002791	regulation of peptide secretion	2.93e-05	0.00291	3.44	15	[RSAD2 - radical s-adenosyl methionine domain containing 2, FFAR2 - free fatty acid receptor 2, FN1 - fibronectin 1, IL1RAP - interleukin 1 receptor accessory protein, CD274 - cd274 molecule, GHSR - growth hormone secretagogue receptor, TNFRSF4 - tumor necrosis factor receptor superfamily, member 4, GOLPH3L - golgi phosphoprotein 3-like, NLRP12 - nlr family, pyrin domain containing 12, PML - prom…
GO:1903555	regulation of tumor necrosis factor superfamily cytokine production	3.01e-05	0.00296	5.63	9	[IL23A - interleukin 23, alpha subunit p19, GHSR - growth hormone secretagogue receptor, TLR2 - toll-like receptor 2, TLR4 - toll-like receptor 4, CLEC7A - c-type lectin domain family 7, member a, DDX58 - dead (asp-glu-ala-asp) box polypeptide 58, CD86 - cd86 molecule, CD274 - cd274 molecule, TICAM1 - toll-like receptor adaptor molecule 1]
GO:0051716	cellular response to stimulus	3.15e-05	0.00308	1.71	51	[ARID3A - at rich interactive domain 3a (bright-like), IFIT2 - interferon-induced protein with tetratricopeptide repeats 2, LGMN - legumain, DTX3L - deltex 3-like (drosophila), CD274 - cd274 molecule, TICAM1 - toll-like receptor adaptor molecule 1, TMEM173 - transmembrane protein 173, PML - promyelocytic leukemia, SPI1 - spleen focus forming virus (sffv) proviral integration oncogene, TLR2 - toll…
GO:0002720	positive regulation of cytokine production involved in immune response	3.27e-05	0.00318	9.61	6	[RSAD2 - radical s-adenosyl methionine domain containing 2, FFAR2 - free fatty acid receptor 2, TLR4 - toll-like receptor 4, DDX58 - dead (asp-glu-ala-asp) box polypeptide 58, IL6 - interleukin 6 (interferon, beta 2), TICAM1 - toll-like receptor adaptor molecule 1]
GO:1903969	regulation of response to macrophage colony-stimulating factor	3.39e-05	0.00326	39.4	3	[CSF1 - colony stimulating factor 1 (macrophage), TLR2 - toll-like receptor 2, TLR4 - toll-like receptor 4]
GO:1903972	regulation of cellular response to macrophage colony-stimulating factor stimulus	3.39e-05	0.00324	39.4	3	[CSF1 - colony stimulating factor 1 (macrophage), TLR2 - toll-like receptor 2, TLR4 - toll-like receptor 4]
GO:0060326	cell chemotaxis	3.5e-05	0.00332	5.52	9	[FFAR2 - free fatty acid receptor 2, VCAM1 - vascular cell adhesion molecule 1, PTPRO - protein tyrosine phosphatase, receptor type, o, CSF3R - colony stimulating factor 3 receptor (granulocyte), CXCL10 - chemokine (c-x-c motif) ligand 10, HBEGF - heparin-binding egf-like growth factor, CNR2 - cannabinoid receptor 2 (macrophage), CCR1 - chemokine (c-c motif) receptor 1, IL6 - interleukin 6 (inter…
GO:0002793	positive regulation of peptide secretion	3.53e-05	0.00334	4.46	11	[TNFRSF4 - tumor necrosis factor receptor superfamily, member 4, FFAR2 - free fatty acid receptor 2, GOLPH3L - golgi phosphoprotein 3-like, NLRP12 - nlr family, pyrin domain containing 12, TLR2 - toll-like receptor 2, TLR4 - toll-like receptor 4, DDX58 - dead (asp-glu-ala-asp) box polypeptide 58, IL1RAP - interleukin 1 receptor accessory protein, CASP1 - caspase 1, apoptosis-related cysteine pept…
GO:0032651	regulation of interleukin-1 beta production	3.77e-05	0.00354	9.38	6	[GHSR - growth hormone secretagogue receptor, NLRP12 - nlr family, pyrin domain containing 12, PML - promyelocytic leukemia, TLR4 - toll-like receptor 4, CLEC7A - c-type lectin domain family 7, member a, CASP1 - caspase 1, apoptosis-related cysteine peptidase]
GO:0002828	regulation of type 2 immune response	3.89e-05	0.00363	12.63	5	[RSAD2 - radical s-adenosyl methionine domain containing 2, IDO1 - indoleamine 2,3-dioxygenase 1, CD86 - cd86 molecule, IL6 - interleukin 6 (interferon, beta 2), HLX - h2.0-like homeobox]
GO:1903557	positive regulation of tumor necrosis factor superfamily cytokine production	4.03e-05	0.00373	7.41	7	[IL23A - interleukin 23, alpha subunit p19, TLR2 - toll-like receptor 2, TLR4 - toll-like receptor 4, CLEC7A - c-type lectin domain family 7, member a, DDX58 - dead (asp-glu-ala-asp) box polypeptide 58, CD86 - cd86 molecule, TICAM1 - toll-like receptor adaptor molecule 1]
GO:0052548	regulation of endopeptidase activity	4.14e-05	0.00381	3.76	13	[TIMP1 - timp metallopeptidase inhibitor 1, LGMN - legumain, PSME2 - proteasome (prosome, macropain) activator subunit 2 (pa28 beta), SERPING1 - serpin peptidase inhibitor, clade g (c1 inhibitor), member 1, PSMB9 - proteasome (prosome, macropain) subunit, beta type, 9, CLEC7A - c-type lectin domain family 7, member a, PLAUR - plasminogen activator, urokinase receptor, NLRP12 - nlr family, pyrin d…
GO:0050921	positive regulation of chemotaxis	4.29e-05	0.00392	6.18	8	[IL23A - interleukin 23, alpha subunit p19, CSF1 - colony stimulating factor 1 (macrophage), LGMN - legumain, CMKLR1 - chemokine-like receptor 1, CXCL10 - chemokine (c-x-c motif) ligand 10, F3 - coagulation factor iii (thromboplastin, tissue factor), CCR1 - chemokine (c-c motif) receptor 1, IL6 - interleukin 6 (interferon, beta 2)]
GO:0051251	positive regulation of lymphocyte activation	4.32e-05	0.00392	4.02	12	[IL23A - interleukin 23, alpha subunit p19, TNFRSF4 - tumor necrosis factor receptor superfamily, member 4, ZBTB7B - zinc finger and btb domain containing 7b, VCAM1 - vascular cell adhesion molecule 1, TLR4 - toll-like receptor 4, CLEC7A - c-type lectin domain family 7, member a, CD86 - cd86 molecule, MAD2L2 - mad2 mitotic arrest deficient-like 2 (yeast), IL6 - interleukin 6 (interferon, beta 2),…
GO:0002830	positive regulation of type 2 immune response	4.59e-05	0.00414	18.76	4	[RSAD2 - radical s-adenosyl methionine domain containing 2, IDO1 - indoleamine 2,3-dioxygenase 1, CD86 - cd86 molecule, IL6 - interleukin 6 (interferon, beta 2)]
GO:0002683	negative regulation of immune system process	4.71e-05	0.00422	3.31	15	[DHX58 - dexh (asp-glu-x-his) box polypeptide 58, SERPING1 - serpin peptidase inhibitor, clade g (c1 inhibitor), member 1, TICAM1 - toll-like receptor adaptor molecule 1, CD274 - cd274 molecule, HLX - h2.0-like homeobox, ADAR - adenosine deaminase, rna-specific, VSIG4 - v-set and immunoglobulin domain containing 4, IRF1 - interferon regulatory factor 1, IDO1 - indoleamine 2,3-dioxygenase 1, PARP1…
GO:0032270	positive regulation of cellular protein metabolic process	4.72e-05	0.0042	2.07	32	[LGMN - legumain, FN1 - fibronectin 1, PSME2 - proteasome (prosome, macropain) activator subunit 2 (pa28 beta), CLEC7A - c-type lectin domain family 7, member a, SPHK1 - sphingosine kinase 1, CCR1 - chemokine (c-c motif) receptor 1, TICAM1 - toll-like receptor adaptor molecule 1, TMEM106A - transmembrane protein 106a, IL23A - interleukin 23, alpha subunit p19, ARRDC4 - arrestin domain containing …
GO:0071675	regulation of mononuclear cell migration	4.72e-05	0.00417	12.16	5	[CSF1 - colony stimulating factor 1 (macrophage), LGMN - legumain, CMKLR1 - chemokine-like receptor 1, CXCL10 - chemokine (c-x-c motif) ligand 10, CCR1 - chemokine (c-c motif) receptor 1]
GO:0050671	positive regulation of lymphocyte proliferation	5.98e-05	0.00526	5.9	8	[TNFRSF4 - tumor necrosis factor receptor superfamily, member 4, IL23A - interleukin 23, alpha subunit p19, VCAM1 - vascular cell adhesion molecule 1, TLR4 - toll-like receptor 4, CD86 - cd86 molecule, IL6 - interleukin 6 (interferon, beta 2), CD274 - cd274 molecule, TICAM1 - toll-like receptor adaptor molecule 1]
GO:0033993	response to lipid	6.1e-05	0.00533	2.74	19	[FFAR2 - free fatty acid receptor 2, CSF3 - colony stimulating factor 3 (granulocyte), CMPK2 - cytidine monophosphate (ump-cmp) kinase 2, mitochondrial, CXCL10 - chemokine (c-x-c motif) ligand 10, JUNB - jun b proto-oncogene, CD274 - cd274 molecule, TICAM1 - toll-like receptor adaptor molecule 1, GHSR - growth hormone secretagogue receptor, DGAT2 - diacylglycerol o-acyltransferase 2, IDO1 - indol…
GO:0032940	secretion by cell	6.13e-05	0.00532	2.43	23	[NEU1 - sialidase 1 (lysosomal sialidase), TIMP1 - timp metallopeptidase inhibitor 1, LGALS3BP - lectin, galactoside-binding, soluble, 3 binding protein, FN1 - fibronectin 1, PSMA5 - proteasome (prosome, macropain) subunit, alpha type, 5, HK3 - hexokinase 3 (white cell), STX11 - syntaxin 11, SERPING1 - serpin peptidase inhibitor, clade g (c1 inhibitor), member 1, IL1RAP - interleukin 1 receptor a…
GO:0022408	negative regulation of cell-cell adhesion	6.18e-05	0.00533	5.14	9	[VSIG4 - v-set and immunoglobulin domain containing 4, IRF1 - interferon regulatory factor 1, CCM2L - cerebral cavernous malformation 2-like, IDO1 - indoleamine 2,3-dioxygenase 1, ZBTB7B - zinc finger and btb domain containing 7b, CD86 - cd86 molecule, MAD2L2 - mad2 mitotic arrest deficient-like 2 (yeast), HLX - h2.0-like homeobox, CD274 - cd274 molecule]
GO:0070102	interleukin-6-mediated signaling pathway	6.19e-05	0.0053	17.51	4	[SOCS3 - suppressor of cytokine signaling 3, SPI1 - spleen focus forming virus (sffv) proviral integration oncogene, STAT1 - signal transducer and activator of transcription 1, 91kda, IL6 - interleukin 6 (interferon, beta 2)]
GO:0002673	regulation of acute inflammatory response	6.4e-05	0.00545	8.57	6	[VSIG4 - v-set and immunoglobulin domain containing 4, FFAR2 - free fatty acid receptor 2, SERPING1 - serpin peptidase inhibitor, clade g (c1 inhibitor), member 1, PTGS2 - prostaglandin-endoperoxide synthase 2 (prostaglandin g/h synthase and cyclooxygenase), IL6 - interleukin 6 (interferon, beta 2), C2 - complement component 2]
GO:0031325	positive regulation of cellular metabolic process	6.41e-05	0.00542	1.64	53	[ARID3A - at rich interactive domain 3a (bright-like), LGMN - legumain, FN1 - fibronectin 1, DTX3L - deltex 3-like (drosophila), TICAM1 - toll-like receptor adaptor molecule 1, TMEM106A - transmembrane protein 106a, IL23A - interleukin 23, alpha subunit p19, TMEM173 - transmembrane protein 173, PML - promyelocytic leukemia, SPI1 - spleen focus forming virus (sffv) proviral integration oncogene, T…
GO:0009612	response to mechanical stimulus	6.62e-05	0.00556	5.1	9	[IRF1 - interferon regulatory factor 1, MAP3K14 - mitogen-activated protein kinase kinase kinase 14, STAT1 - signal transducer and activator of transcription 1, 91kda, TLR4 - toll-like receptor 4, PTGS2 - prostaglandin-endoperoxide synthase 2 (prostaglandin g/h synthase and cyclooxygenase), KCNJ2 - potassium inwardly-rectifying channel, subfamily j, member 2, JUNB - jun b proto-oncogene, CXCL10 -…
GO:0039528	cytoplasmic pattern recognition receptor signaling pathway in response to virus	6.7e-05	0.0056	32.84	3	[TMEM173 - transmembrane protein 173, IRF7 - interferon regulatory factor 7, DDX58 - dead (asp-glu-ala-asp) box polypeptide 58]
GO:0045084	positive regulation of interleukin-12 biosynthetic process	6.7e-05	0.00556	32.84	3	[IRF1 - interferon regulatory factor 1, TLR4 - toll-like receptor 4, CLEC7A - c-type lectin domain family 7, member a]
GO:0045357	regulation of interferon-beta biosynthetic process	6.7e-05	0.00553	32.84	3	[NMI - n-myc (and stat) interactor, TLR4 - toll-like receptor 4, TICAM1 - toll-like receptor adaptor molecule 1]
GO:0050731	positive regulation of peptidyl-tyrosine phosphorylation	7.08e-05	0.00581	5.05	9	[IL23A - interleukin 23, alpha subunit p19, FCGR1A - fc fragment of igg, high affinity ia, receptor (cd64), CSF3 - colony stimulating factor 3 (granulocyte), SOCS3 - suppressor of cytokine signaling 3, PARP14 - poly (adp-ribose) polymerase family, member 14, PARP9 - poly (adp-ribose) polymerase family, member 9, TGFA - transforming growth factor, alpha, HBEGF - heparin-binding egf-like growth fac…
GO:2000026	regulation of multicellular organismal development	7.28e-05	0.00594	1.92	36	[TIMP1 - timp metallopeptidase inhibitor 1, FN1 - fibronectin 1, PSME2 - proteasome (prosome, macropain) activator subunit 2 (pa28 beta), PTPRO - protein tyrosine phosphatase, receptor type, o, STAT1 - signal transducer and activator of transcription 1, 91kda, SPHK1 - sphingosine kinase 1, CD274 - cd274 molecule, HLX - h2.0-like homeobox, CCR1 - chemokine (c-c motif) receptor 1, IL23A - interleuk…
GO:0006935	chemotaxis	7.93e-05	0.00644	4.08	11	[FFAR2 - free fatty acid receptor 2, PLAUR - plasminogen activator, urokinase receptor, CMKLR1 - chemokine-like receptor 1, VCAM1 - vascular cell adhesion molecule 1, PTPRO - protein tyrosine phosphatase, receptor type, o, CSF3R - colony stimulating factor 3 receptor (granulocyte), CXCL10 - chemokine (c-x-c motif) ligand 10, HBEGF - heparin-binding egf-like growth factor, CNR2 - cannabinoid recep…
GO:0044419	interspecies interaction between organisms	7.96e-05	0.00642	2.45	22	[RSAD2 - radical s-adenosyl methionine domain containing 2, DAXX - death-domain associated protein, DHX58 - dexh (asp-glu-x-his) box polypeptide 58, SCARB2 - scavenger receptor class b, member 2, FN1 - fibronectin 1, PSMB10 - proteasome (prosome, macropain) subunit, beta type, 10, STAT2 - signal transducer and activator of transcription 2, 113kda, PSMB9 - proteasome (prosome, macropain) subunit, …
GO:0032757	positive regulation of interleukin-8 production	8.03e-05	0.00644	10.95	5	[FFAR2 - free fatty acid receptor 2, TLR2 - toll-like receptor 2, TLR4 - toll-like receptor 4, CLEC7A - c-type lectin domain family 7, member a, DDX58 - dead (asp-glu-ala-asp) box polypeptide 58]
GO:0034341	response to interferon-gamma	8.09e-05	0.00645	6.66	7	[IFITM3 - interferon induced transmembrane protein 3, TLR2 - toll-like receptor 2, STAT1 - signal transducer and activator of transcription 1, 91kda, TLR4 - toll-like receptor 4, TRIM21 - tripartite motif containing 21, GBP2 - guanylate binding protein 2, interferon-inducible, CASP1 - caspase 1, apoptosis-related cysteine peptidase]
GO:0002688	regulation of leukocyte chemotaxis	8.09e-05	0.00641	6.66	7	[IL23A - interleukin 23, alpha subunit p19, CSF1 - colony stimulating factor 1 (macrophage), LGMN - legumain, CMKLR1 - chemokine-like receptor 1, CXCL10 - chemokine (c-x-c motif) ligand 10, CCR1 - chemokine (c-c motif) receptor 1, IL6 - interleukin 6 (interferon, beta 2)]
GO:0032652	regulation of interleukin-1 production	8.18e-05	0.00644	8.21	6	[GHSR - growth hormone secretagogue receptor, NLRP12 - nlr family, pyrin domain containing 12, PML - promyelocytic leukemia, TLR4 - toll-like receptor 4, CLEC7A - c-type lectin domain family 7, member a, CASP1 - caspase 1, apoptosis-related cysteine peptidase]
GO:0042330	taxis	8.78e-05	0.00688	4.04	11	[FFAR2 - free fatty acid receptor 2, PLAUR - plasminogen activator, urokinase receptor, CMKLR1 - chemokine-like receptor 1, VCAM1 - vascular cell adhesion molecule 1, PTPRO - protein tyrosine phosphatase, receptor type, o, CSF3R - colony stimulating factor 3 receptor (granulocyte), CXCL10 - chemokine (c-x-c motif) ligand 10, HBEGF - heparin-binding egf-like growth factor, CNR2 - cannabinoid recep…
GO:0031399	regulation of protein modification process	8.85e-05	0.0069	1.92	35	[FN1 - fibronectin 1, DTX3L - deltex 3-like (drosophila), STAT2 - signal transducer and activator of transcription 2, 113kda, SPHK1 - sphingosine kinase 1, TICAM1 - toll-like receptor adaptor molecule 1, CCR1 - chemokine (c-c motif) receptor 1, TMEM106A - transmembrane protein 106a, ADAR - adenosine deaminase, rna-specific, IL23A - interleukin 23, alpha subunit p19, ARRDC4 - arrestin domain conta…
GO:2000514	regulation of CD4-positive, alpha-beta T cell activation	9.2e-05	0.00713	8.04	6	[IL23A - interleukin 23, alpha subunit p19, ZBTB7B - zinc finger and btb domain containing 7b, IL27 - interleukin 27, CD86 - cd86 molecule, CD274 - cd274 molecule, HLX - h2.0-like homeobox]
GO:0034121	regulation of toll-like receptor signaling pathway	9.2e-05	0.00709	8.04	6	[RSAD2 - radical s-adenosyl methionine domain containing 2, IRF1 - interferon regulatory factor 1, IRF7 - interferon regulatory factor 7, TLR2 - toll-like receptor 2, TLR4 - toll-like receptor 4, TICAM1 - toll-like receptor adaptor molecule 1]
GO:1904407	positive regulation of nitric oxide metabolic process	9.46e-05	0.00725	10.59	5	[TMEM106A - transmembrane protein 106a, PTGS2 - prostaglandin-endoperoxide synthase 2 (prostaglandin g/h synthase and cyclooxygenase), TLR4 - toll-like receptor 4, CLEC7A - c-type lectin domain family 7, member a, TICAM1 - toll-like receptor adaptor molecule 1]
GO:0030595	leukocyte chemotaxis	9.72e-05	0.00741	6.47	7	[FFAR2 - free fatty acid receptor 2, PTPRO - protein tyrosine phosphatase, receptor type, o, CSF3R - colony stimulating factor 3 receptor (granulocyte), CXCL10 - chemokine (c-x-c motif) ligand 10, CNR2 - cannabinoid receptor 2 (macrophage), CCR1 - chemokine (c-c motif) receptor 1, IL6 - interleukin 6 (interferon, beta 2)]
GO:0050793	regulation of developmental process	9.9e-05	0.0075	1.77	42	[TIMP1 - timp metallopeptidase inhibitor 1, LGMN - legumain, PSME2 - proteasome (prosome, macropain) activator subunit 2 (pa28 beta), FN1 - fibronectin 1, CMKLR1 - chemokine-like receptor 1, STAT2 - signal transducer and activator of transcription 2, 113kda, PTPRO - protein tyrosine phosphatase, receptor type, o, STAT1 - signal transducer and activator of transcription 1, 91kda, CLEC7A - c-type l…
GO:0071396	cellular response to lipid	0.000102	0.00772	3.44	13	[FFAR2 - free fatty acid receptor 2, CSF3 - colony stimulating factor 3 (granulocyte), CMPK2 - cytidine monophosphate (ump-cmp) kinase 2, mitochondrial, CXCL10 - chemokine (c-x-c motif) ligand 10, TICAM1 - toll-like receptor adaptor molecule 1, CD274 - cd274 molecule, GHSR - growth hormone secretagogue receptor, DGAT2 - diacylglycerol o-acyltransferase 2, CD180 - cd180 molecule, TLR4 - toll-like …
GO:2000116	regulation of cysteine-type endopeptidase activity	0.000105	0.00789	4.32	10	[NLRP12 - nlr family, pyrin domain containing 12, PLAUR - plasminogen activator, urokinase receptor, LGMN - legumain, PML - promyelocytic leukemia, PTGS2 - prostaglandin-endoperoxide synthase 2 (prostaglandin g/h synthase and cyclooxygenase), PSMB9 - proteasome (prosome, macropain) subunit, beta type, 9, CLEC7A - c-type lectin domain family 7, member a, F3 - coagulation factor iii (thromboplastin…
GO:2000778	positive regulation of interleukin-6 secretion	0.000105	0.00786	15.45	4	[TLR2 - toll-like receptor 2, TLR4 - toll-like receptor 4, DDX58 - dead (asp-glu-ala-asp) box polypeptide 58, IL1RAP - interleukin 1 receptor accessory protein]
GO:0032727	positive regulation of interferon-alpha production	0.000105	0.00781	15.45	4	[IRF7 - interferon regulatory factor 7, TLR4 - toll-like receptor 4, STAT1 - signal transducer and activator of transcription 1, 91kda, DDX58 - dead (asp-glu-ala-asp) box polypeptide 58]
GO:0046634	regulation of alpha-beta T cell activation	0.000106	0.00784	6.38	7	[IL23A - interleukin 23, alpha subunit p19, IRF1 - interferon regulatory factor 1, ZBTB7B - zinc finger and btb domain containing 7b, IL27 - interleukin 27, CD86 - cd86 molecule, HLX - h2.0-like homeobox, CD274 - cd274 molecule]
GO:0045622	regulation of T-helper cell differentiation	0.000111	0.00812	10.26	5	[IL23A - interleukin 23, alpha subunit p19, ZBTB7B - zinc finger and btb domain containing 7b, IL27 - interleukin 27, CD86 - cd86 molecule, HLX - h2.0-like homeobox]
GO:0071260	cellular response to mechanical stimulus	0.000116	0.00843	7.73	6	[IRF1 - interferon regulatory factor 1, MAP3K14 - mitogen-activated protein kinase kinase kinase 14, PTGS2 - prostaglandin-endoperoxide synthase 2 (prostaglandin g/h synthase and cyclooxygenase), TLR4 - toll-like receptor 4, KCNJ2 - potassium inwardly-rectifying channel, subfamily j, member 2, CASP1 - caspase 1, apoptosis-related cysteine peptidase]
GO:0034127	regulation of MyD88-independent toll-like receptor signaling pathway	0.000116	0.00841	28.14	3	[IRF7 - interferon regulatory factor 7, TLR4 - toll-like receptor 4, TICAM1 - toll-like receptor adaptor molecule 1]
GO:0050777	negative regulation of immune response	0.000128	0.00921	5.31	8	[ADAR - adenosine deaminase, rna-specific, VSIG4 - v-set and immunoglobulin domain containing 4, DHX58 - dexh (asp-glu-x-his) box polypeptide 58, PARP14 - poly (adp-ribose) polymerase family, member 14, ZBTB7B - zinc finger and btb domain containing 7b, SERPING1 - serpin peptidase inhibitor, clade g (c1 inhibitor), member 1, NMI - n-myc (and stat) interactor, HLX - h2.0-like homeobox]
GO:0002526	acute inflammatory response	0.000129	0.00926	9.95	5	[FN1 - fibronectin 1, VCAM1 - vascular cell adhesion molecule 1, TREM1 - triggering receptor expressed on myeloid cells 1, IL6 - interleukin 6 (interferon, beta 2), PLSCR1 - phospholipid scramblase 1]
GO:0050663	cytokine secretion	0.000129	0.00921	9.95	5	[TMEM106A - transmembrane protein 106a, ZBTB7B - zinc finger and btb domain containing 7b, TLR2 - toll-like receptor 2, TLR4 - toll-like receptor 4, IL1RAP - interleukin 1 receptor accessory protein]
GO:0032268	regulation of cellular protein metabolic process	0.000137	0.00973	1.71	44	[TIMP1 - timp metallopeptidase inhibitor 1, LGMN - legumain, PSME2 - proteasome (prosome, macropain) activator subunit 2 (pa28 beta), FN1 - fibronectin 1, DTX3L - deltex 3-like (drosophila), STAT2 - signal transducer and activator of transcription 2, 113kda, CLEC7A - c-type lectin domain family 7, member a, SPHK1 - sphingosine kinase 1, TICAM1 - toll-like receptor adaptor molecule 1, CCR1 - chemo…
GO:0002474	antigen processing and presentation of peptide antigen via MHC class I	0.000138	0.00976	6.13	7	[MR1 - major histocompatibility complex, class i-related, FCGR1A - fc fragment of igg, high affinity ia, receptor (cd64), PSME2 - proteasome (prosome, macropain) activator subunit 2 (pa28 beta), PSMA5 - proteasome (prosome, macropain) subunit, alpha type, 5, PSMB10 - proteasome (prosome, macropain) subunit, beta type, 10, PSMB9 - proteasome (prosome, macropain) subunit, beta type, 9, TAP1 - trans…
GO:1901224	positive regulation of NIK/NF-kappaB signaling	0.000144	0.0101	7.43	6	[IL23A - interleukin 23, alpha subunit p19, NLRP12 - nlr family, pyrin domain containing 12, TLR2 - toll-like receptor 2, TLR4 - toll-like receptor 4, EIF2AK2 - eukaryotic translation initiation factor 2-alpha kinase 2, SPHK1 - sphingosine kinase 1]
GO:0050868	negative regulation of T cell activation	0.00015	0.0105	6.05	7	[VSIG4 - v-set and immunoglobulin domain containing 4, IRF1 - interferon regulatory factor 1, IDO1 - indoleamine 2,3-dioxygenase 1, ZBTB7B - zinc finger and btb domain containing 7b, CD86 - cd86 molecule, CD274 - cd274 molecule, HLX - h2.0-like homeobox]
GO:0009893	positive regulation of metabolic process	0.000157	0.0109	1.57	55	[ARID3A - at rich interactive domain 3a (bright-like), LGMN - legumain, FN1 - fibronectin 1, DTX3L - deltex 3-like (drosophila), TICAM1 - toll-like receptor adaptor molecule 1, TMEM106A - transmembrane protein 106a, IL23A - interleukin 23, alpha subunit p19, TMEM173 - transmembrane protein 173, PML - promyelocytic leukemia, SPI1 - spleen focus forming virus (sffv) proviral integration oncogene, T…
GO:0002696	positive regulation of leukocyte activation	0.000169	0.0117	3.49	12	[IL23A - interleukin 23, alpha subunit p19, TNFRSF4 - tumor necrosis factor receptor superfamily, member 4, ZBTB7B - zinc finger and btb domain containing 7b, VCAM1 - vascular cell adhesion molecule 1, TLR4 - toll-like receptor 4, CLEC7A - c-type lectin domain family 7, member a, CD86 - cd86 molecule, MAD2L2 - mad2 mitotic arrest deficient-like 2 (yeast), IL6 - interleukin 6 (interferon, beta 2),…
GO:0070887	cellular response to chemical stimulus	0.000174	0.012	1.93	32	[P2RY13 - purinergic receptor p2y, g-protein coupled, 13, IFIT2 - interferon-induced protein with tetratricopeptide repeats 2, FFAR2 - free fatty acid receptor 2, LGMN - legumain, STAT1 - signal transducer and activator of transcription 1, 91kda, JUNB - jun b proto-oncogene, SPHK1 - sphingosine kinase 1, CD274 - cd274 molecule, TICAM1 - toll-like receptor adaptor molecule 1, TMEM173 - transmembra…
GO:0002700	regulation of production of molecular mediator of immune response	0.00018	0.0124	5.05	8	[TNFRSF4 - tumor necrosis factor receptor superfamily, member 4, RSAD2 - radical s-adenosyl methionine domain containing 2, FFAR2 - free fatty acid receptor 2, TLR4 - toll-like receptor 4, DDX58 - dead (asp-glu-ala-asp) box polypeptide 58, MAD2L2 - mad2 mitotic arrest deficient-like 2 (yeast), IL6 - interleukin 6 (interferon, beta 2), TICAM1 - toll-like receptor adaptor molecule 1]
GO:0002822	regulation of adaptive immune response based on somatic recombination of immune receptors built from immunoglobulin superfamily domains	0.00018	0.0123	5.05	8	[IL23A - interleukin 23, alpha subunit p19, RSAD2 - radical s-adenosyl methionine domain containing 2, ZBTB7B - zinc finger and btb domain containing 7b, IL27 - interleukin 27, MAD2L2 - mad2 mitotic arrest deficient-like 2 (yeast), HLX - h2.0-like homeobox, IL6 - interleukin 6 (interferon, beta 2), CD274 - cd274 molecule]
GO:0045075	regulation of interleukin-12 biosynthetic process	0.000183	0.0125	24.63	3	[IRF1 - interferon regulatory factor 1, TLR4 - toll-like receptor 4, CLEC7A - c-type lectin domain family 7, member a]
GO:2001034	positive regulation of double-strand break repair via nonhomologous end joining	0.000183	0.0124	24.63	3	[DTX3L - deltex 3-like (drosophila), PARP9 - poly (adp-ribose) polymerase family, member 9, MAD2L2 - mad2 mitotic arrest deficient-like 2 (yeast)]
GO:0050920	regulation of chemotaxis	0.00019	0.0128	4.44	9	[IL23A - interleukin 23, alpha subunit p19, CSF1 - colony stimulating factor 1 (macrophage), LGMN - legumain, CMKLR1 - chemokine-like receptor 1, PTPRO - protein tyrosine phosphatase, receptor type, o, CXCL10 - chemokine (c-x-c motif) ligand 10, F3 - coagulation factor iii (thromboplastin, tissue factor), CCR1 - chemokine (c-c motif) receptor 1, IL6 - interleukin 6 (interferon, beta 2)]
GO:0006959	humoral immune response	0.000192	0.0128	5.82	7	[VSIG4 - v-set and immunoglobulin domain containing 4, SERPING1 - serpin peptidase inhibitor, clade g (c1 inhibitor), member 1, PSMB10 - proteasome (prosome, macropain) subunit, beta type, 10, CXCL10 - chemokine (c-x-c motif) ligand 10, TREM1 - triggering receptor expressed on myeloid cells 1, IL6 - interleukin 6 (interferon, beta 2), C2 - complement component 2]
GO:0046903	secretion	0.000192	0.0128	2.25	23	[NEU1 - sialidase 1 (lysosomal sialidase), TIMP1 - timp metallopeptidase inhibitor 1, LGALS3BP - lectin, galactoside-binding, soluble, 3 binding protein, FN1 - fibronectin 1, PSMA5 - proteasome (prosome, macropain) subunit, alpha type, 5, HK3 - hexokinase 3 (white cell), STX11 - syntaxin 11, SERPING1 - serpin peptidase inhibitor, clade g (c1 inhibitor), member 1, IL1RAP - interleukin 1 receptor a…
GO:0002479	antigen processing and presentation of exogenous peptide antigen via MHC class I, TAP-dependent	0.000196	0.013	7.04	6	[FCGR1A - fc fragment of igg, high affinity ia, receptor (cd64), PSME2 - proteasome (prosome, macropain) activator subunit 2 (pa28 beta), PSMA5 - proteasome (prosome, macropain) subunit, alpha type, 5, PSMB10 - proteasome (prosome, macropain) subunit, beta type, 10, PSMB9 - proteasome (prosome, macropain) subunit, beta type, 9, TAP1 - transporter 1, atp-binding cassette, sub-family b (mdr/tap)]
GO:0042531	positive regulation of tyrosine phosphorylation of STAT protein	0.000197	0.013	9.12	5	[IL23A - interleukin 23, alpha subunit p19, SOCS3 - suppressor of cytokine signaling 3, PARP14 - poly (adp-ribose) polymerase family, member 14, PARP9 - poly (adp-ribose) polymerase family, member 9, IL6 - interleukin 6 (interferon, beta 2)]
GO:0006471	protein ADP-ribosylation	0.000207	0.0136	13.13	4	[PARP14 - poly (adp-ribose) polymerase family, member 14, PARP11 - poly (adp-ribose) polymerase family, member 11, PARP9 - poly (adp-ribose) polymerase family, member 9, PARP12 - poly (adp-ribose) polymerase family, member 12]
GO:0071345	cellular response to cytokine stimulus	0.00021	0.0137	3.03	14	[IFIT2 - interferon-induced protein with tetratricopeptide repeats 2, CSF3 - colony stimulating factor 3 (granulocyte), SOCS3 - suppressor of cytokine signaling 3, STAT1 - signal transducer and activator of transcription 1, 91kda, GBP2 - guanylate binding protein 2, interferon-inducible, TMEM173 - transmembrane protein 173, NLRP12 - nlr family, pyrin domain containing 12, IRF1 - interferon regula…
GO:1903038	negative regulation of leukocyte cell-cell adhesion	0.000224	0.0146	5.68	7	[VSIG4 - v-set and immunoglobulin domain containing 4, IRF1 - interferon regulatory factor 1, IDO1 - indoleamine 2,3-dioxygenase 1, ZBTB7B - zinc finger and btb domain containing 7b, CD86 - cd86 molecule, CD274 - cd274 molecule, HLX - h2.0-like homeobox]
GO:0030335	positive regulation of cell migration	0.000226	0.0146	2.87	15	[CSF1 - colony stimulating factor 1 (macrophage), LGMN - legumain, FN1 - fibronectin 1, CMKLR1 - chemokine-like receptor 1, CLEC7A - c-type lectin domain family 7, member a, CXCL10 - chemokine (c-x-c motif) ligand 10, SPHK1 - sphingosine kinase 1, CCR1 - chemokine (c-c motif) receptor 1, CD274 - cd274 molecule, IL23A - interleukin 23, alpha subunit p19, TNFAIP6 - tumor necrosis factor, alpha-indu…
GO:0034124	regulation of MyD88-dependent toll-like receptor signaling pathway	0.00023	0.0148	65.67	2	[IRF1 - interferon regulatory factor 1, IRF7 - interferon regulatory factor 7]
GO:1904466	positive regulation of matrix metallopeptidase secretion	0.00023	0.0148	65.67	2	[TLR2 - toll-like receptor 2, TLR4 - toll-like receptor 4]
GO:0016046	detection of fungus	0.00023	0.0147	65.67	2	[TLR4 - toll-like receptor 4, CLEC7A - c-type lectin domain family 7, member a]
GO:0050867	positive regulation of cell activation	0.000234	0.0148	3.37	12	[IL23A - interleukin 23, alpha subunit p19, TNFRSF4 - tumor necrosis factor receptor superfamily, member 4, ZBTB7B - zinc finger and btb domain containing 7b, VCAM1 - vascular cell adhesion molecule 1, TLR4 - toll-like receptor 4, CLEC7A - c-type lectin domain family 7, member a, CD86 - cd86 molecule, MAD2L2 - mad2 mitotic arrest deficient-like 2 (yeast), IL6 - interleukin 6 (interferon, beta 2),…
GO:0001932	regulation of protein phosphorylation	0.000236	0.0149	2.02	28	[FN1 - fibronectin 1, STAT2 - signal transducer and activator of transcription 2, 113kda, SPHK1 - sphingosine kinase 1, CCR1 - chemokine (c-c motif) receptor 1, ADAR - adenosine deaminase, rna-specific, IL23A - interleukin 23, alpha subunit p19, TMEM106A - transmembrane protein 106a, PML - promyelocytic leukemia, TLR4 - toll-like receptor 4, PTGS2 - prostaglandin-endoperoxide synthase 2 (prostagl…
GO:0080090	regulation of primary metabolic process	0.00024	0.0151	1.39	77	[ARID3A - at rich interactive domain 3a (bright-like), TIMP1 - timp metallopeptidase inhibitor 1, LGMN - legumain, FN1 - fibronectin 1, DTX3L - deltex 3-like (drosophila), HLX - h2.0-like homeobox, TICAM1 - toll-like receptor adaptor molecule 1, TMEM106A - transmembrane protein 106a, IL23A - interleukin 23, alpha subunit p19, TMEM173 - transmembrane protein 173, PML - promyelocytic leukemia, TLR2…
GO:0002687	positive regulation of leukocyte migration	0.000242	0.0152	5.61	7	[IL23A - interleukin 23, alpha subunit p19, CSF1 - colony stimulating factor 1 (macrophage), LGMN - legumain, CMKLR1 - chemokine-like receptor 1, CXCL10 - chemokine (c-x-c motif) ligand 10, CCR1 - chemokine (c-c motif) receptor 1, IL6 - interleukin 6 (interferon, beta 2)]
GO:0008015	blood circulation	0.000253	0.0158	12.51	4	[OLR1 - oxidized low density lipoprotein (lectin-like) receptor 1, SERPING1 - serpin peptidase inhibitor, clade g (c1 inhibitor), member 1, STAT1 - signal transducer and activator of transcription 1, 91kda, CXCL10 - chemokine (c-x-c motif) ligand 10]
GO:0042590	antigen processing and presentation of exogenous peptide antigen via MHC class I	0.000262	0.0163	6.68	6	[FCGR1A - fc fragment of igg, high affinity ia, receptor (cd64), PSME2 - proteasome (prosome, macropain) activator subunit 2 (pa28 beta), PSMA5 - proteasome (prosome, macropain) subunit, alpha type, 5, PSMB10 - proteasome (prosome, macropain) subunit, beta type, 10, PSMB9 - proteasome (prosome, macropain) subunit, beta type, 9, TAP1 - transporter 1, atp-binding cassette, sub-family b (mdr/tap)]
GO:0050789	regulation of biological process	0.00027	0.0167	1.21	116	[DHX58 - dexh (asp-glu-x-his) box polypeptide 58, LGALS3BP - lectin, galactoside-binding, soluble, 3 binding protein, LGMN - legumain, FN1 - fibronectin 1, USP18 - ubiquitin specific peptidase 18, DTX3L - deltex 3-like (drosophila), UNC93B1 - unc-93 homolog b1 (c. elegans), DDX60 - dead (asp-glu-ala-asp) box polypeptide 60, CD274 - cd274 molecule, TICAM1 - toll-like receptor adaptor molecule 1, T…
GO:2000147	positive regulation of cell motility	0.000281	0.0173	2.81	15	[CSF1 - colony stimulating factor 1 (macrophage), LGMN - legumain, FN1 - fibronectin 1, CMKLR1 - chemokine-like receptor 1, CLEC7A - c-type lectin domain family 7, member a, CXCL10 - chemokine (c-x-c motif) ligand 10, SPHK1 - sphingosine kinase 1, CCR1 - chemokine (c-c motif) receptor 1, CD274 - cd274 molecule, IL23A - interleukin 23, alpha subunit p19, TNFAIP6 - tumor necrosis factor, alpha-indu…
GO:0032760	positive regulation of tumor necrosis factor production	0.000287	0.0176	6.57	6	[IL23A - interleukin 23, alpha subunit p19, TLR2 - toll-like receptor 2, TLR4 - toll-like receptor 4, CLEC7A - c-type lectin domain family 7, member a, DDX58 - dead (asp-glu-ala-asp) box polypeptide 58, TICAM1 - toll-like receptor adaptor molecule 1]
GO:0032480	negative regulation of type I interferon production	0.000291	0.0177	8.42	5	[DHX58 - dexh (asp-glu-x-his) box polypeptide 58, HERC5 - hect and rld domain containing e3 ubiquitin protein ligase 5, UBE2L6 - ubiquitin-conjugating enzyme e2l 6, NMI - n-myc (and stat) interactor, DDX58 - dead (asp-glu-ala-asp) box polypeptide 58]
GO:0042130	negative regulation of T cell proliferation	0.000291	0.0177	8.42	5	[VSIG4 - v-set and immunoglobulin domain containing 4, IDO1 - indoleamine 2,3-dioxygenase 1, ZBTB7B - zinc finger and btb domain containing 7b, CD86 - cd86 molecule, CD274 - cd274 molecule]
GO:0050706	regulation of interleukin-1 beta secretion	0.000305	0.0185	11.94	4	[NLRP12 - nlr family, pyrin domain containing 12, PML - promyelocytic leukemia, TLR4 - toll-like receptor 4, CASP1 - caspase 1, apoptosis-related cysteine peptidase]
GO:0050829	defense response to Gram-negative bacterium	0.000305	0.0184	11.94	4	[IL23A - interleukin 23, alpha subunit p19, MR1 - major histocompatibility complex, class i-related, TLR4 - toll-like receptor 4, IL6 - interleukin 6 (interferon, beta 2)]
GO:0060334	regulation of interferon-gamma-mediated signaling pathway	0.000305	0.0183	11.94	4	[SOCS3 - suppressor of cytokine signaling 3, PARP14 - poly (adp-ribose) polymerase family, member 14, PARP9 - poly (adp-ribose) polymerase family, member 9, STAT1 - signal transducer and activator of transcription 1, 91kda]
GO:0060330	regulation of response to interferon-gamma	0.000305	0.0182	11.94	4	[SOCS3 - suppressor of cytokine signaling 3, PARP14 - poly (adp-ribose) polymerase family, member 14, PARP9 - poly (adp-ribose) polymerase family, member 9, STAT1 - signal transducer and activator of transcription 1, 91kda]
GO:0051272	positive regulation of cellular component movement	0.000337	0.0201	2.77	15	[CSF1 - colony stimulating factor 1 (macrophage), LGMN - legumain, FN1 - fibronectin 1, CMKLR1 - chemokine-like receptor 1, CLEC7A - c-type lectin domain family 7, member a, CXCL10 - chemokine (c-x-c motif) ligand 10, SPHK1 - sphingosine kinase 1, CCR1 - chemokine (c-c motif) receptor 1, CD274 - cd274 molecule, IL23A - interleukin 23, alpha subunit p19, TNFAIP6 - tumor necrosis factor, alpha-indu…
GO:0051173	positive regulation of nitrogen compound metabolic process	0.000338	0.02	1.59	49	[ARID3A - at rich interactive domain 3a (bright-like), LGMN - legumain, FN1 - fibronectin 1, DTX3L - deltex 3-like (drosophila), TICAM1 - toll-like receptor adaptor molecule 1, TMEM106A - transmembrane protein 106a, IL23A - interleukin 23, alpha subunit p19, TMEM173 - transmembrane protein 173, PML - promyelocytic leukemia, SPI1 - spleen focus forming virus (sffv) proviral integration oncogene, T…
GO:0033209	tumor necrosis factor-mediated signaling pathway	0.000349	0.0206	5.28	7	[TNFRSF4 - tumor necrosis factor receptor superfamily, member 4, MAP3K14 - mitogen-activated protein kinase kinase kinase 14, PSME2 - proteasome (prosome, macropain) activator subunit 2 (pa28 beta), PSMA5 - proteasome (prosome, macropain) subunit, alpha type, 5, PSMB10 - proteasome (prosome, macropain) subunit, beta type, 10, STAT1 - signal transducer and activator of transcription 1, 91kda, PSMB…
GO:0032660	regulation of interleukin-17 production	0.000365	0.0214	11.42	4	[IL23A - interleukin 23, alpha subunit p19, TLR4 - toll-like receptor 4, SPHK1 - sphingosine kinase 1, IL6 - interleukin 6 (interferon, beta 2)]
GO:0042036	negative regulation of cytokine biosynthetic process	0.000365	0.0213	11.42	4	[GHSR - growth hormone secretagogue receptor, NLRP12 - nlr family, pyrin domain containing 12, NMI - n-myc (and stat) interactor, IL6 - interleukin 6 (interferon, beta 2)]
GO:0046640	regulation of alpha-beta T cell proliferation	0.000365	0.0213	11.42	4	[IL23A - interleukin 23, alpha subunit p19, IRF1 - interferon regulatory factor 1, ZBTB7B - zinc finger and btb domain containing 7b, CD274 - cd274 molecule]
GO:0043370	regulation of CD4-positive, alpha-beta T cell differentiation	0.000369	0.0214	8.01	5	[IL23A - interleukin 23, alpha subunit p19, ZBTB7B - zinc finger and btb domain containing 7b, IL27 - interleukin 27, CD86 - cd86 molecule, HLX - h2.0-like homeobox]
GO:1902531	regulation of intracellular signal transduction	0.000387	0.0223	1.81	34	[DHX58 - dexh (asp-glu-x-his) box polypeptide 58, FN1 - fibronectin 1, CMKLR1 - chemokine-like receptor 1, DDX60 - dead (asp-glu-ala-asp) box polypeptide 60, STAT1 - signal transducer and activator of transcription 1, 91kda, IER3 - immediate early response 3, SPHK1 - sphingosine kinase 1, TICAM1 - toll-like receptor adaptor molecule 1, CCR1 - chemokine (c-c motif) receptor 1, TMEM106A - transmemb…
GO:0007162	negative regulation of cell adhesion	0.000399	0.0229	3.67	10	[VSIG4 - v-set and immunoglobulin domain containing 4, IRF1 - interferon regulatory factor 1, CCM2L - cerebral cavernous malformation 2-like, IDO1 - indoleamine 2,3-dioxygenase 1, ZBTB7B - zinc finger and btb domain containing 7b, PTPRO - protein tyrosine phosphatase, receptor type, o, CD86 - cd86 molecule, MAD2L2 - mad2 mitotic arrest deficient-like 2 (yeast), HLX - h2.0-like homeobox, CD274 - c…
GO:0045595	regulation of cell differentiation	0.000426	0.0244	1.86	31	[FN1 - fibronectin 1, PSME2 - proteasome (prosome, macropain) activator subunit 2 (pa28 beta), CMKLR1 - chemokine-like receptor 1, PTPRO - protein tyrosine phosphatase, receptor type, o, STAT1 - signal transducer and activator of transcription 1, 91kda, CLEC7A - c-type lectin domain family 7, member a, JUNB - jun b proto-oncogene, HLX - h2.0-like homeobox, CCR1 - chemokine (c-c motif) receptor 1,…
GO:0010565	regulation of cellular ketone metabolic process	0.000428	0.0244	4.45	8	[GHSR - growth hormone secretagogue receptor, DGAT2 - diacylglycerol o-acyltransferase 2, PSME2 - proteasome (prosome, macropain) activator subunit 2 (pa28 beta), PSMA5 - proteasome (prosome, macropain) subunit, alpha type, 5, PDK1 - pyruvate dehydrogenase kinase, isozyme 1, PSMB10 - proteasome (prosome, macropain) subunit, beta type, 10, PTGS2 - prostaglandin-endoperoxide synthase 2 (prostagland…
GO:0050704	regulation of interleukin-1 secretion	0.000433	0.0246	10.95	4	[NLRP12 - nlr family, pyrin domain containing 12, PML - promyelocytic leukemia, TLR4 - toll-like receptor 4, CASP1 - caspase 1, apoptosis-related cysteine peptidase]
GO:0065007	biological regulation	0.000435	0.0246	1.19	120	[DHX58 - dexh (asp-glu-x-his) box polypeptide 58, LGALS3BP - lectin, galactoside-binding, soluble, 3 binding protein, LGMN - legumain, FN1 - fibronectin 1, USP18 - ubiquitin specific peptidase 18, DTX3L - deltex 3-like (drosophila), UNC93B1 - unc-93 homolog b1 (c. elegans), DDX60 - dead (asp-glu-ala-asp) box polypeptide 60, CD274 - cd274 molecule, TICAM1 - toll-like receptor adaptor molecule 1, T…
GO:0048585	negative regulation of response to stimulus	0.000438	0.0246	1.89	30	[DHX58 - dexh (asp-glu-x-his) box polypeptide 58, LGMN - legumain, PSME2 - proteasome (prosome, macropain) activator subunit 2 (pa28 beta), PTPRO - protein tyrosine phosphatase, receptor type, o, STAT1 - signal transducer and activator of transcription 1, 91kda, HLX - h2.0-like homeobox, TICAM1 - toll-like receptor adaptor molecule 1, ADAR - adenosine deaminase, rna-specific, ZBTB7B - zinc finger…
GO:0002718	regulation of cytokine production involved in immune response	0.000445	0.0249	6.06	6	[RSAD2 - radical s-adenosyl methionine domain containing 2, FFAR2 - free fatty acid receptor 2, TLR4 - toll-like receptor 4, DDX58 - dead (asp-glu-ala-asp) box polypeptide 58, IL6 - interleukin 6 (interferon, beta 2), TICAM1 - toll-like receptor adaptor molecule 1]
GO:0070661	leukocyte proliferation	0.000445	0.0248	6.06	6	[TNFRSF4 - tumor necrosis factor receptor superfamily, member 4, IL23A - interleukin 23, alpha subunit p19, CSF1 - colony stimulating factor 1 (macrophage), CD180 - cd180 molecule, PSMB10 - proteasome (prosome, macropain) subunit, beta type, 10, TLR4 - toll-like receptor 4]
GO:0040017	positive regulation of locomotion	0.000452	0.0251	2.69	15	[CSF1 - colony stimulating factor 1 (macrophage), LGMN - legumain, FN1 - fibronectin 1, CMKLR1 - chemokine-like receptor 1, CLEC7A - c-type lectin domain family 7, member a, CXCL10 - chemokine (c-x-c motif) ligand 10, SPHK1 - sphingosine kinase 1, CCR1 - chemokine (c-c motif) receptor 1, CD274 - cd274 molecule, IL23A - interleukin 23, alpha subunit p19, TNFAIP6 - tumor necrosis factor, alpha-indu…
GO:0050710	negative regulation of cytokine secretion	0.000463	0.0256	7.64	5	[GHSR - growth hormone secretagogue receptor, TNFRSF4 - tumor necrosis factor receptor superfamily, member 4, NLRP12 - nlr family, pyrin domain containing 12, FN1 - fibronectin 1, PML - promyelocytic leukemia]
GO:0010604	positive regulation of macromolecule metabolic process	0.000475	0.0262	1.55	50	[ARID3A - at rich interactive domain 3a (bright-like), LGMN - legumain, FN1 - fibronectin 1, DTX3L - deltex 3-like (drosophila), TICAM1 - toll-like receptor adaptor molecule 1, TMEM106A - transmembrane protein 106a, IL23A - interleukin 23, alpha subunit p19, TMEM173 - transmembrane protein 173, PML - promyelocytic leukemia, SPI1 - spleen focus forming virus (sffv) proviral integration oncogene, T…
[truncated: 52 more rows]

## Sheet: TableS7D
Table S7D. GO Terms among upregulated genes in high stress group (post- vs. pre-weaning)
GO Term	Description	P-value	FDR q-value	Enrichment	No. Genes	Genes
[truncated: 114 more rows]
